# Supplementary material for: Magnetically-dressed CrSBr exciton-polaritons in ultrastrong coupling regime
Source: Research Square preprint supplement (doi:10.21203/rs.3.rs-3164083/v1), 2023-07-26
Supplement: Supplementary file 1 [file Figure1.xlsx]

## Sheet: b
E//a					E//a				E//b					E//b
Experiment		Simulation				n	k		Experiment		Simulation				n	k
Energy (eV)	△R/R0	Energy (eV)	△R/R0		Energy (eV)	Refractive index			Energy (eV)	△R/R0	Energy (eV)	△R/R0		Energy (eV)	Refractive index
1.3839	0.770025	1.39013	0.846793		1.39013	3.16228	0		1.3839	2.42142	1.39013	2.85971		1.39013	0.659508	5.54087
1.38377	0.781426	1.38998	0.846948		1.38998	3.16228	0		1.38377	2.41484	1.38998	2.8575		1.38998	0.674353	5.57595
1.38365	0.792042	1.38982	0.847102		1.38982	3.16228	0		1.38365	2.48077	1.38982	2.85522		1.38982	0.689756	5.61141
1.38352	0.786324	1.38967	0.847257		1.38967	3.16228	0		1.38352	2.46174	1.38967	2.85285		1.38967	0.705744	5.64725
1.38339	0.767161	1.38951	0.847412		1.38951	3.16228	0		1.38339	2.45788	1.38951	2.8504		1.38951	0.722346	5.68349
1.38326	0.809206	1.38936	0.847566		1.38936	3.16228	0		1.38326	2.44417	1.38936	2.84786		1.38936	0.739592	5.72013
1.38314	0.796114	1.3892	0.847721		1.3892	3.16228	0		1.38314	2.44574	1.3892	2.84523		1.3892	0.757515	5.75715
1.38301	0.791084	1.38904	0.847875		1.38904	3.16228	0		1.38301	2.49849	1.38904	2.84251		1.38904	0.776149	5.79457
1.38288	0.781213	1.38889	0.84803		1.38889	3.16228	0		1.38288	2.47338	1.38889	2.83969		1.38889	0.795531	5.83239
1.38275	0.798719	1.38873	0.848184		1.38873	3.16228	0		1.38275	2.45595	1.38873	2.83676		1.38873	0.815698	5.87059
1.38263	0.794057	1.38858	0.848339		1.38858	3.16228	0		1.38263	2.41643	1.38858	2.83373		1.38858	0.836691	5.90919
1.3825	0.774255	1.38842	0.848493		1.38842	3.16228	0		1.3825	2.45563	1.38842	2.83059		1.38842	0.858553	5.94817
1.38237	0.790456	1.38827	0.848647		1.38827	3.16228	0		1.38237	2.41164	1.38827	2.82733		1.38827	0.88133	5.98752
1.38225	0.745081	1.38811	0.848802		1.38811	3.16228	0		1.38225	2.42035	1.38811	2.82395		1.38811	0.905068	6.02724
1.38212	0.785119	1.38796	0.848956		1.38796	3.16228	0		1.38212	2.44053	1.38796	2.82045		1.38796	0.92982	6.06732
1.38199	0.799688	1.3878	0.84911		1.3878	3.16228	0		1.38199	2.44055	1.3878	2.81681		1.3878	0.955637	6.10775
1.38187	0.767527	1.38765	0.849265		1.38765	3.16228	0		1.38187	2.39555	1.38765	2.81304		1.38765	0.982577	6.1485
1.38174	0.784375	1.38749	0.849419		1.38749	3.16228	0		1.38174	2.45258	1.38749	2.80912		1.38749	1.0107	6.18956
1.38161	0.808681	1.38733	0.849573		1.38733	3.16228	0		1.38161	2.46219	1.38733	2.80505		1.38733	1.04007	6.23091
1.38148	0.823748	1.38718	0.849727		1.38718	3.16228	0		1.38148	2.39641	1.38718	2.80082		1.38718	1.07074	6.27251
1.38136	0.80369	1.38702	0.849881		1.38702	3.16228	0		1.38136	2.40543	1.38702	2.79643		1.38702	1.1028	6.31434
1.38123	0.771387	1.38687	0.850035		1.38687	3.16228	0		1.38123	2.40526	1.38687	2.79187		1.38687	1.13631	6.35637
1.3811	0.794578	1.38671	0.850189		1.38671	3.16228	0		1.3811	2.40557	1.38671	2.78712		1.38671	1.17135	6.39853
1.38098	0.78661	1.38656	0.850343		1.38656	3.16228	0		1.38098	2.37294	1.38656	2.78219		1.38656	1.208	6.4408
1.38085	0.769442	1.3864	0.850497		1.3864	3.16228	0		1.38085	2.35659	1.3864	2.77706		1.3864	1.24634	6.4831
1.38072	0.80174	1.38625	0.850651		1.38625	3.16228	0		1.38072	2.38215	1.38625	2.77173		1.38625	1.28646	6.52538
1.3806	0.804876	1.38609	0.850805		1.38609	3.16228	0		1.3806	2.36894	1.38609	2.76618		1.38609	1.32844	6.56756
1.38047	0.798776	1.38594	0.850959		1.38594	3.16228	0		1.38047	2.31513	1.38594	2.7604		1.38594	1.37237	6.60955
1.38034	0.790282	1.38578	0.851112		1.38578	3.16228	0		1.38034	2.32433	1.38578	2.75439		1.38578	1.41836	6.65126
1.38022	0.762225	1.38563	0.851266		1.38563	3.16228	0		1.38022	2.31405	1.38563	2.74813		1.38563	1.46648	6.69258
1.38009	0.810913	1.38547	0.85142		1.38547	3.16228	0		1.38009	2.28022	1.38547	2.74161		1.38547	1.51685	6.73339
1.37996	0.771267	1.38532	0.851573		1.38532	3.16228	0		1.37996	2.24584	1.38532	2.73482		1.38532	1.56955	6.77354
1.37984	0.796472	1.38517	0.851727		1.38517	3.16228	0		1.37984	2.25546	1.38517	2.72774		1.38517	1.62467	6.81287
1.37971	0.769273	1.38501	0.85188		1.38501	3.16228	0		1.37971	2.21945	1.38501	2.72037		1.38501	1.6823	6.85123
1.37958	0.762046	1.38486	0.852034		1.38486	3.16228	0		1.37958	2.22673	1.38486	2.7127		1.38486	1.74254	6.88841
1.37946	0.814632	1.3847	0.852187		1.3847	3.16228	0		1.37946	2.21651	1.3847	2.7047		1.3847	1.80544	6.92419
1.37933	0.760649	1.38455	0.85234		1.38455	3.16228	0		1.37933	2.19682	1.38455	2.69636		1.38455	1.87108	6.95834
1.3792	0.783726	1.38439	0.852494		1.38439	3.16228	0		1.3792	2.21216	1.38439	2.68768		1.38439	1.93951	6.9906
1.37908	0.801122	1.38424	0.852647		1.38424	3.16228	0		1.37908	2.19511	1.38424	2.67863		1.38424	2.01075	7.02068
1.37895	0.804606	1.38408	0.8528		1.38408	3.16228	0		1.37895	2.22356	1.38408	2.6692		1.38408	2.08483	7.04827
1.37882	0.797648	1.38393	0.852953		1.38393	3.16228	0		1.37883	2.15299	1.38393	2.65939		1.38393	2.16172	7.07303
1.3787	0.779781	1.38377	0.853106		1.38377	3.16228	0		1.3787	2.18338	1.38377	2.64917		1.38377	2.24138	7.0946
1.37857	0.824923	1.38362	0.853259		1.38362	3.16228	0		1.37857	2.15853	1.38362	2.63853		1.38362	2.32372	7.11261
1.37845	0.781698	1.38347	0.853412		1.38347	3.16228	0		1.37845	2.17835	1.38347	2.62747		1.38347	2.40861	7.12664
1.37832	0.806994	1.38331	0.853565		1.38331	3.16228	0		1.37832	2.17416	1.38331	2.61597		1.38331	2.49587	7.13629
1.37819	0.796978	1.38316	0.853718		1.38316	3.16228	0		1.37819	2.152	1.38316	2.60403		1.38316	2.58525	7.14112
1.37807	0.767303	1.383	0.853871		1.383	3.16228	0		1.37807	2.1447	1.383	2.59163		1.383	2.67645	7.14071
1.37794	0.784486	1.38285	0.854023		1.38285	3.16228	0		1.37794	2.15474	1.38285	2.57877		1.38285	2.7691	7.13463
1.37781	0.783783	1.38269	0.854176		1.38269	3.16228	0		1.37781	2.142	1.38269	2.56545		1.38269	2.86276	7.12248
1.37769	0.794449	1.38254	0.854328		1.38254	3.16228	0		1.37769	2.17185	1.38254	2.55166		1.38254	2.9569	7.10388
1.37756	0.756115	1.38239	0.854481		1.38239	3.16228	0		1.37756	2.15721	1.38239	2.53743		1.38239	3.05092	7.0785
1.37744	0.771654	1.38223	0.854633		1.38223	3.16228	0		1.37744	2.14829	1.38223	2.52274		1.38223	3.14416	7.04606
1.37731	0.806729	1.38208	0.854786		1.38208	3.16228	0		1.37731	2.19795	1.38208	2.50762		1.38208	3.23587	7.00637
1.37718	0.805008	1.38192	0.854938		1.38192	3.16228	0		1.37718	2.19646	1.38192	2.49209		1.38192	3.32527	6.95932
1.37706	0.783958	1.38177	0.85509		1.38177	3.16228	0		1.37706	2.26062	1.38177	2.47616		1.38177	3.4115	6.9049
1.37693	0.811927	1.38162	0.855242		1.38162	3.16228	0		1.37693	2.29108	1.38162	2.45987		1.38162	3.49369	6.84321
1.37681	0.814707	1.38146	0.855394		1.38146	3.16228	0		1.37681	2.30849	1.38146	2.44325		1.38146	3.57097	6.77449
1.37668	0.817399	1.38131	0.855546		1.38131	3.16228	0		1.37668	2.31977	1.38131	2.42635		1.38131	3.64245	6.6991
1.37655	0.799122	1.38115	0.855698		1.38115	3.16228	0		1.37655	2.40491	1.38115	2.40921		1.38115	3.70731	6.61752
1.37643	0.784152	1.381	0.85585		1.381	3.16228	0		1.37643	2.39934	1.381	2.39189		1.381	3.76477	6.53035
1.3763	0.792986	1.38085	0.856002		1.38085	3.16228	0		1.3763	2.44996	1.38085	2.37446		1.38085	3.81412	6.43832
1.37618	0.7918	1.38069	0.856154		1.38069	3.16228	0		1.37618	2.48423	1.38069	2.35698		1.38069	3.85477	6.34223
1.37605	0.778009	1.38054	0.856305		1.38054	3.16228	0		1.37605	2.51447	1.38054	2.33953		1.38054	3.88621	6.24298
1.37592	0.802883	1.38039	0.856457		1.38039	3.16228	0		1.37592	2.51373	1.38039	2.32221		1.38039	3.90808	6.14151
1.3758	0.796769	1.38023	0.856608		1.38023	3.16228	0		1.3758	2.56103	1.38023	2.30511		1.38023	3.92014	6.03881
1.37567	0.772695	1.38008	0.85676		1.38008	3.16228	0		1.37567	2.53874	1.38008	2.28834		1.38008	3.92228	5.93587
1.37555	0.774703	1.37992	0.856911		1.37992	3.16228	0		1.37555	2.58492	1.37992	2.27202		1.37992	3.9145	5.83368
1.37542	0.794565	1.37977	0.857062		1.37977	3.16228	0		1.37542	2.62041	1.37977	2.25627		1.37977	3.89694	5.73319
1.3753	0.788022	1.37962	0.857213		1.37962	3.16228	0		1.3753	2.63387	1.37962	2.24122		1.37962	3.86982	5.63533
1.37517	0.79654	1.37946	0.857364		1.37946	3.16228	0		1.37517	2.64688	1.37946	2.22705		1.37946	3.83347	5.54095
1.37504	0.782841	1.37931	0.857515		1.37931	3.16228	0		1.37504	2.67008	1.37931	2.2139		1.37931	3.7883	5.45087
1.37492	0.790861	1.37916	0.857666		1.37916	3.16228	0		1.37492	2.65903	1.37916	2.20195		1.37916	3.73478	5.3658
1.37479	0.792909	1.379	0.857817		1.379	3.16228	0		1.37479	2.686	1.379	2.1914		1.379	3.67345	5.28642
1.37467	0.820559	1.37885	0.857968		1.37885	3.16228	0		1.37467	2.64842	1.37885	2.18245		1.37885	3.60487	5.21333
1.37454	0.770923	1.3787	0.858118		1.3787	3.16228	0		1.37454	2.76182	1.3787	2.17531		1.3787	3.52965	5.14703
1.37442	0.784929	1.37854	0.858269		1.37854	3.16228	0		1.37442	2.7225	1.37854	2.17021		1.37854	3.44843	5.088
1.37429	0.81379	1.37839	0.858419		1.37839	3.16228	0		1.37429	2.72825	1.37839	2.16737		1.37839	3.36186	5.03663
1.37417	0.821437	1.37824	0.85857		1.37824	3.16228	0		1.37417	2.72556	1.37824	2.16702		1.37824	3.27063	4.99323
1.37404	0.812758	1.37808	0.85872		1.37808	3.16228	0		1.37404	2.75394	1.37808	2.16937		1.37808	3.17541	4.95809
1.37391	0.801156	1.37793	0.85887		1.37793	3.16228	0		1.37391	2.76477	1.37793	2.17461		1.37793	3.0769	4.93139
1.37379	0.776276	1.37778	0.85902		1.37778	3.16228	0		1.37379	2.74643	1.37778	2.1829		1.37778	2.97581	4.91328
1.37366	0.801396	1.37762	0.85917		1.37762	3.16228	0		1.37366	2.7906	1.37762	2.19436		1.37762	2.87284	4.90383
1.37354	0.795457	1.37747	0.85932		1.37747	3.16228	0		1.37354	2.82311	1.37747	2.20905		1.37747	2.76869	4.90305
1.37341	0.801685	1.37732	0.85947		1.37732	3.16228	0		1.37341	2.84458	1.37732	2.22695		1.37732	2.66406	4.91087
1.37329	0.770616	1.37717	0.85962		1.37717	3.16228	0		1.37329	2.89575	1.37717	2.24796		1.37717	2.55961	4.92716
1.37316	0.793944	1.37701	0.859769		1.37701	3.16228	0		1.37316	2.80689	1.37701	2.27191		1.37701	2.45599	4.95172
1.37304	0.830699	1.37686	0.859919		1.37686	3.16228	0		1.37304	2.82796	1.37686	2.29853		1.37686	2.35379	4.98428
1.37291	0.811418	1.37671	0.860068		1.37671	3.16228	0		1.37291	2.81227	1.37671	2.32749		1.37671	2.25357	5.0245
1.37279	0.829564	1.37655	0.860217		1.37655	3.16228	0		1.37279	2.83733	1.37655	2.3584		1.37655	2.15581	5.07201
1.37266	0.783255	1.3764	0.860367		1.3764	3.16228	0		1.37266	2.93161	1.3764	2.39081		1.3764	2.06095	5.1264
1.37254	0.801948	1.37625	0.860516		1.37625	3.16228	0		1.37254	2.92816	1.37625	2.42427		1.37625	1.96932	5.18721
1.37241	0.776701	1.3761	0.860665		1.3761	3.16228	0		1.37241	2.94211	1.3761	2.45832		1.3761	1.88121	5.254
1.37229	0.808491	1.37594	0.860814		1.37594	3.16228	0		1.37229	2.99274	1.37594	2.49253		1.37594	1.79682	5.32629
1.37216	0.794732	1.37579	0.860963		1.37579	3.16228	0		1.37216	2.94863	1.37579	2.52648		1.37579	1.71629	5.40363
1.37204	0.79618	1.37564	0.861111		1.37564	3.16228	0		1.37204	2.9548	1.37564	2.55984		1.37564	1.63971	5.4856
1.37191	0.791958	1.37549	0.86126		1.37549	3.16228	0		1.37191	2.974	1.37549	2.59231		1.37549	1.56708	5.5718
1.37178	0.811932	1.37533	0.861408		1.37533	3.16228	0		1.37179	2.93565	1.37533	2.62366		1.37533	1.49838	5.66185
1.37166	0.788274	1.37518	0.861557		1.37518	3.16228	0		1.37166	2.96103	1.37518	2.6537		1.37518	1.43355	5.75542
1.37153	0.804172	1.37503	0.861705		1.37503	3.16228	0		1.37154	2.99856	1.37503	2.68231		1.37503	1.37251	5.85222
1.37141	0.805178	1.37488	0.861854		1.37488	3.16228	0		1.37141	2.95633	1.37488	2.70941		1.37488	1.31512	5.952
1.37128	0.794352	1.37472	0.862002		1.37472	3.16228	0		1.37129	2.96141	1.37472	2.73496		1.37472	1.26127	6.05455
1.37116	0.79607	1.37457	0.86215		1.37457	3.16228	0		1.37116	2.9785	1.37457	2.75897		1.37457	1.2108	6.15968
1.37104	0.807434	1.37442	0.862298		1.37442	3.16228	0		1.37104	2.97053	1.37442	2.78143		1.37442	1.16358	6.26727
1.37091	0.78906	1.37427	0.862446		1.37427	3.16228	0		1.37091	3.01417	1.37427	2.80241		1.37427	1.11945	6.37721
1.37079	0.793654	1.37411	0.862594		1.37411	3.16228	0		1.37079	3.01127	1.37411	2.82194		1.37411	1.07827	6.48942
1.37066	0.777441	1.37396	0.862741		1.37396	3.16228	0		1.37066	2.99807	1.37396	2.8401		1.37396	1.03989	6.60385
1.37054	0.794382	1.37381	0.862889		1.37381	3.16228	0		1.37054	3.00865	1.37381	2.85696		1.37381	1.00418	6.72048
1.37041	0.799071	1.37366	0.863037		1.37366	3.16228	0		1.37041	3.01888	1.37366	2.87259		1.37366	0.97099	6.83933
1.37029	0.792335	1.3735	0.863184		1.3735	3.16228	0		1.37029	2.96208	1.3735	2.88707		1.3735	0.940212	6.96042
1.37016	0.792869	1.37335	0.863331		1.37335	3.16228	0		1.37016	2.97507	1.37335	2.90046		1.37335	0.911724	7.08379
1.37004	0.776172	1.3732	0.863479		1.3732	3.16228	0		1.37004	2.99947	1.3732	2.91286		1.3732	0.88542	7.20951
1.36991	0.76238	1.37305	0.863626		1.37305	3.16228	0		1.36991	2.99018	1.37305	2.92432		1.37305	0.861201	7.33769
1.36979	0.799457	1.3729	0.863773		1.3729	3.16228	0		1.36979	3.00077	1.3729	2.93491		1.3729	0.838979	7.46841
1.36966	0.795993	1.37274	0.86392		1.37274	3.16228	0		1.36966	3.04765	1.37274	2.9447		1.37274	0.818671	7.6018
1.36954	0.823011	1.37259	0.864067		1.37259	3.16228	0		1.36954	2.99794	1.37259	2.95374		1.37259	0.800208	7.73801
1.36941	0.815959	1.37244	0.864214		1.37244	3.16228	0		1.36941	3.04672	1.37244	2.9621		1.37244	0.783527	7.8772
1.36929	0.81904	1.37229	0.86436		1.37229	3.16228	0		1.36929	3.05778	1.37229	2.96981		1.37229	0.768576	8.01954
1.36916	0.794898	1.37214	0.864507		1.37214	3.16228	0		1.36916	3.00463	1.37214	2.97694		1.37214	0.75531	8.16524
1.36904	0.79676	1.37198	0.864654		1.37198	3.16228	0		1.36904	3.04049	1.37198	2.98352		1.37198	0.743696	8.3145
1.36892	0.80214	1.37183	0.8648		1.37183	3.16228	0		1.36892	2.9978	1.37183	2.9896		1.37183	0.733707	8.46758
1.36879	0.780299	1.37168	0.864946		1.37168	3.16228	0		1.36879	3.0058	1.37168	2.9952		1.37168	0.72533	8.62473
1.36867	0.805086	1.37153	0.865093		1.37153	3.16228	0		1.36867	2.99202	1.37153	3.00037		1.37153	0.718559	8.78624
1.36854	0.801763	1.37138	0.865239		1.37138	3.16228	0		1.36854	3.02203	1.37138	3.00514		1.37138	0.7134	8.95242
1.36842	0.80821	1.37123	0.865385		1.37123	3.16228	0		1.36842	3.03228	1.37123	3.00954		1.37123	0.70987	9.12363
1.36829	0.806903	1.37107	0.865531		1.37107	3.16228	0		1.36829	2.99193	1.37107	3.01358		1.37107	0.707998	9.30022
1.36817	0.782617	1.37092	0.865677		1.37092	3.16228	0		1.36817	2.97284	1.37092	3.0173		1.37092	0.707828	9.48263
1.36804	0.799602	1.37077	0.865823		1.37077	3.16228	0		1.36804	3.05041	1.37077	3.02072		1.37077	0.709416	9.6713
1.36792	0.783723	1.37062	0.865968		1.37062	3.16228	0		1.36792	3.01074	1.37062	3.02385		1.37062	0.712836	9.86673
1.3678	0.793886	1.37047	0.866114		1.37047	3.16228	0		1.3678	3.00181	1.37047	3.02672		1.37047	0.718182	10.0695
1.36767	0.778765	1.37032	0.866259		1.37032	3.16228	0		1.36767	2.98177	1.37032	3.02933		1.37032	0.725568	10.2802
1.36755	0.820582	1.37017	0.866405		1.37017	3.16228	0		1.36755	2.96746	1.37017	3.03171		1.37017	0.73513	10.4995
1.36742	0.780206	1.37001	0.86655		1.37001	3.16228	0		1.36742	3.00371	1.37001	3.03386		1.37001	0.747037	10.7282
1.3673	0.796347	1.36986	0.866696		1.36986	3.16228	0		1.3673	2.99513	1.36986	3.03581		1.36986	0.761487	10.9671
1.36717	0.858218	1.36971	0.866841		1.36971	3.16228	0		1.36717	2.99968	1.36971	3.03754		1.36971	0.778724	11.2171
1.36705	0.822718	1.36956	0.866986		1.36956	3.16228	0		1.36705	2.99619	1.36956	3.03909		1.36956	0.799032	11.4795
1.36693	0.784229	1.36941	0.867131		1.36941	3.16228	0		1.36693	2.96426	1.36941	3.04044		1.36941	0.822759	11.7553
1.3668	0.790268	1.36926	0.867276		1.36926	3.16228	0		1.3668	3.01579	1.36926	3.04161		1.36926	0.850318	12.046
1.36668	0.808994	1.36911	0.867421		1.36911	3.16228	0		1.36668	2.98132	1.36911	3.04261		1.36911	0.882213	12.3531
1.36655	0.793514	1.36896	0.867565		1.36896	3.16228	0		1.36655	2.98754	1.36896	3.04342		1.36896	0.919053	12.6785
1.36643	0.79209	1.3688	0.86771		1.3688	3.16228	0		1.36643	2.91761	1.3688	3.04406		1.3688	0.96158	13.0243
1.36631	0.803952	1.36865	0.867854		1.36865	3.16228	0		1.36631	2.95024	1.36865	3.04452		1.36865	1.01071	13.3928
1.36618	0.796977	1.3685	0.867999		1.3685	3.16228	0		1.36618	2.87698	1.3685	3.04481		1.3685	1.06758	13.7871
1.36606	0.807606	1.36835	0.868143		1.36835	3.16228	0		1.36606	2.89894	1.36835	3.0449		1.36835	1.1336	14.2104
1.36593	0.818799	1.3682	0.868288		1.3682	3.16228	0		1.36593	2.86679	1.3682	3.0448		1.3682	1.21056	14.6667
1.36581	0.789859	1.36805	0.868432		1.36805	3.16228	0		1.36581	2.84713	1.36805	3.0445		1.36805	1.30076	15.1609
1.36569	0.793371	1.3679	0.868576		1.3679	3.16228	0		1.36569	2.84346	1.3679	3.04398		1.3679	1.40717	15.6986
1.36556	0.786887	1.36775	0.86872		1.36775	3.16228	0		1.36556	2.77465	1.36775	3.04321		1.36775	1.53368	16.2871
1.36544	0.799077	1.3676	0.868864		1.3676	3.16228	0		1.36544	2.78459	1.3676	3.04218		1.3676	1.68551	16.9349
1.36531	0.808732	1.36745	0.869008		1.36745	3.16228	0		1.36531	2.74836	1.36745	3.04084		1.36745	1.86976	17.6528
1.36519	0.811334	1.3673	0.869151		1.3673	3.16228	0		1.36519	2.76803	1.3673	3.03914		1.3673	2.09631	18.4546
1.36507	0.781996	1.36714	0.869295		1.36714	3.16228	0		1.36507	2.73026	1.36714	3.03702		1.36714	2.37922	19.3574
1.36494	0.778167	1.36699	0.869439		1.36699	3.16228	0		1.36494	2.67949	1.36699	3.03439		1.36699	2.73913	20.3835
1.36482	0.793974	1.36684	0.869582		1.36684	3.16228	0		1.36482	2.65492	1.36684	3.03111		1.36684	3.20719	21.5619
1.3647	0.806551	1.36669	0.869726		1.36669	3.16228	0		1.3647	2.63492	1.36669	3.02702		1.36669	3.8323	22.9295
1.36457	0.777769	1.36654	0.869869		1.36654	3.16228	0		1.36457	2.60865	1.36654	3.02183		1.36654	4.69425	24.5332
1.36445	0.792842	1.36639	0.870012		1.36639	3.16228	0		1.36445	2.59455	1.36639	3.01512		1.36639	5.92919	26.4265
1.36432	0.810578	1.36624	0.870155		1.36624	3.16228	0		1.36433	2.6032	1.36624	3.00621		1.36624	7.77918	28.6502
1.3642	0.767528	1.36609	0.870298		1.36609	3.16228	0		1.3642	2.52642	1.36609	2.99397		1.36609	10.6824	31.1505
1.36408	0.804033	1.36594	0.870441		1.36594	3.16228	0		1.36408	2.54449	1.36594	2.97645		1.36594	15.37	33.4867
1.36395	0.818846	1.36579	0.870584		1.36579	3.16228	0		1.36395	2.50885	1.36579	2.95067		1.36579	22.5074	34.0693
1.36383	0.790275	1.36564	0.870727		1.36564	3.16228	0		1.36383	2.45666	1.36564	2.91414		1.36564	30.4672	30.0875
1.36371	0.79747	1.36549	0.87087		1.36549	3.16228	0		1.36371	2.53299	1.36549	2.86942		1.36549	34.5427	22.2032
1.36358	0.811206	1.36534	0.871012		1.36534	3.16228	0		1.36358	2.4527	1.36534	2.82343		1.36534	34.0594	15.1182
1.36346	0.802518	1.36519	0.871155		1.36519	3.16228	0		1.36346	2.42296	1.36519	2.78049		1.36519	31.8184	10.4647
1.36334	0.82673	1.36504	0.871297		1.36504	3.16228	0		1.36334	2.38061	1.36504	2.74157		1.36504	29.406	7.58406
1.36321	0.816737	1.36489	0.87144		1.36489	3.16228	0		1.36321	2.43041	1.36489	2.70637		1.36489	27.2634	5.74943
1.36309	0.823935	1.36474	0.871582		1.36474	3.16228	0		1.36309	2.47584	1.36474	2.67433		1.36474	25.4452	4.52517
1.36297	0.802947	1.36459	0.871724		1.36459	3.16228	0		1.36297	2.47782	1.36459	2.64498		1.36459	23.9117	3.67068
1.36284	0.8211	1.36444	0.871866		1.36444	3.16228	0		1.36284	2.45409	1.36444	2.61771		1.36444	22.6102	3.05069
1.36272	0.815195	1.36429	0.872008		1.36429	3.16228	0		1.36272	2.38176	1.36429	2.59334		1.36429	21.4946	2.58595
1.3626	0.792087	1.36414	0.87215		1.36414	3.16228	0		1.3626	2.27935	1.36414	2.56596		1.36414	20.5283	2.22796
1.36247	0.790378	1.36399	0.872292		1.36399	3.16228	0		1.36247	2.25633	1.36399	2.55025		1.36399	19.6828	1.94581
1.36235	0.838434	1.36384	0.872434		1.36384	3.16228	0		1.36235	2.36747	1.36384	2.53297		1.36384	18.9363	1.71905
1.36223	0.807941	1.36369	0.872575		1.36369	3.16228	0		1.36223	2.4394	1.36369	2.49237		1.36369	18.2717	1.53375
1.3621	0.840732	1.36354	0.872717		1.36354	3.16228	0		1.3621	2.41164	1.36354	2.46937		1.36354	17.6756	1.38013
1.36198	0.798442	1.36339	0.872858		1.36339	3.16228	0		1.36198	2.40832	1.36339	2.48806		1.36339	17.1374	1.25116
1.36186	0.811883	1.36324	0.873		1.36324	3.16228	0		1.36186	2.39485	1.36324	2.49673		1.36324	16.6487	1.14168
1.36173	0.804313	1.36309	0.873141		1.36309	3.16228	0		1.36173	2.38291	1.36309	2.45597		1.36309	16.2024	1.04784
1.36161	0.818805	1.36294	0.873282		1.36294	3.16228	0		1.36161	2.298	1.36294	2.37527		1.36294	15.793	0.96669
1.36149	0.835184	1.36279	0.873424		1.36279	3.16228	0		1.36149	2.21868	1.36279	2.31311		1.36279	15.4157	0.895967
1.36136	0.843954	1.36264	0.873565		1.36264	3.16228	0		1.36136	2.17266	1.36264	2.32971		1.36264	15.0668	0.833896
1.36124	0.818241	1.36249	0.873706		1.36249	3.16228	0		1.36124	2.0679	1.36249	2.40077		1.36249	14.7428	0.779068
1.36112	0.810202	1.36234	0.873846		1.36234	3.16228	0		1.36112	2.0264	1.36234	2.46309		1.36234	14.441	0.730356
1.361	0.815243	1.36219	0.873987		1.36219	3.16228	0		1.361	2.11627	1.36219	2.48623		1.36219	14.159	0.686845
1.36087	0.821288	1.36204	0.874128		1.36204	3.16228	0		1.36087	2.23517	1.36204	2.46458		1.36204	13.8949	0.647791
1.36075	0.790456	1.36189	0.874269		1.36189	3.16228	0		1.36075	2.38735	1.36189	2.39872		1.36189	13.6467	0.612578
1.36063	0.78666	1.36174	0.874409		1.36174	3.16228	0		1.36063	2.41461	1.36174	2.29284		1.36174	13.4131	0.580695
1.3605	0.788552	1.36159	0.87455		1.36159	3.16228	0		1.3605	2.44278	1.36159	2.16436		1.36159	13.1927	0.551718
1.36038	0.800251	1.36144	0.87469		1.36144	3.16228	0		1.36038	2.56174	1.36144	2.05577		1.36144	12.9843	0.525285
1.36026	0.852153	1.36129	0.87483		1.36129	3.16228	0		1.36026	2.52919	1.36129	2.0204		1.36129	12.7868	0.501093
1.36014	0.805469	1.36114	0.874971		1.36114	3.16228	0		1.36014	2.48919	1.36114	2.07351		1.36114	12.5994	0.478882
1.36001	0.825214	1.36099	0.875111		1.36099	3.16228	0		1.36001	2.50396	1.36099	2.17766		1.36099	12.4213	0.45843
1.35989	0.804082	1.36084	0.875251		1.36084	3.16228	0		1.35989	2.44607	1.36084	2.28639		1.36084	12.2517	0.439546
1.35977	0.848839	1.36069	0.875391		1.36069	3.16228	0		1.35977	2.46987	1.36069	2.37492		1.36069	12.0899	0.422064
1.35964	0.820019	1.36054	0.875531		1.36054	3.16228	0		1.35964	2.3337	1.36054	2.437		1.36054	11.9355	0.405841
1.35952	0.762551	1.36039	0.875671		1.36039	3.16228	0		1.35952	2.27637	1.36039	2.47424		1.36039	11.7878	0.390752
1.3594	0.844532	1.36025	0.87581		1.36025	3.16228	0		1.3594	2.18747	1.36025	2.48989		1.36025	11.6465	0.376686
1.35928	0.802107	1.3601	0.87595		1.3601	3.16228	0		1.35928	2.11772	1.3601	2.48654		1.3601	11.511	0.363547
1.35915	0.826515	1.35995	0.87609		1.35995	3.16228	0		1.35915	2.05604	1.35995	2.46567		1.35995	11.381	0.351249
1.35903	0.817959	1.3598	0.876229		1.3598	3.16228	0		1.35903	1.94926	1.3598	2.42772		1.3598	11.2561	0.339719
1.35891	0.789769	1.35965	0.876368		1.35965	3.16228	0		1.35891	1.86367	1.35965	2.37236		1.35965	11.1361	0.328888
1.35879	0.80419	1.3595	0.876508		1.3595	3.16228	0		1.35879	1.76566	1.3595	2.29897		1.3595	11.0205	0.318697
1.35866	0.816774	1.35935	0.876647		1.35935	3.16228	0		1.35866	1.72645	1.35935	2.20737		1.35935	10.9092	0.309092
1.35854	0.812155	1.3592	0.876786		1.3592	3.16228	0		1.35854	1.6531	1.3592	2.09891		1.3592	10.8019	0.300027
1.35842	0.809443	1.35905	0.876925		1.35905	3.16228	0		1.35842	1.6348	1.35905	1.97808		1.35905	10.6984	0.291458
1.3583	0.833065	1.3589	0.877064		1.3589	3.16228	0		1.3583	1.65317	1.3589	1.85404		1.3589	10.5984	0.283347
1.35817	0.825299	1.35876	0.877203		1.35876	3.16228	0		1.35817	1.6708	1.35876	1.7411		1.35876	10.5018	0.275659
1.35805	0.821576	1.35861	0.877342		1.35861	3.16228	0		1.35805	1.74568	1.35861	1.65638		1.35861	10.4083	0.268363
1.35793	0.853073	1.35846	0.877481		1.35846	3.16228	0		1.35793	1.85877	1.35846	1.61419		1.35846	10.3179	0.261429
1.35781	0.80744	1.35831	0.87762		1.35831	3.16228	0		1.35781	1.94429	1.35831	1.62005		1.35831	10.2303	0.254834
1.35768	0.816055	1.35816	0.877758		1.35816	3.16228	0		1.35768	1.9975	1.35816	1.66847		1.35816	10.1454	0.248552
1.35756	0.826056	1.35801	0.877897		1.35801	3.16228	0		1.35756	2.13579	1.35801	1.74646		1.35801	10.0631	0.242562
1.35744	0.799839	1.35786	0.878035		1.35786	3.16228	0		1.35744	2.22322	1.35786	1.83928		1.35786	9.9832	0.236845
1.35732	0.812673	1.35771	0.878174		1.35771	3.16228	0		1.35732	2.22772	1.35771	1.93488		1.35771	9.90567	0.231384
1.35719	0.821043	1.35757	0.878312		1.35757	3.16228	0		1.35719	2.34551	1.35757	2.02541		1.35757	9.83037	0.22616
1.35707	0.803979	1.35742	0.87845		1.35742	3.16228	0		1.35707	2.35474	1.35742	2.10671		1.35742	9.75718	0.221161
1.35695	0.804581	1.35727	0.878588		1.35727	3.16228	0		1.35695	2.43928	1.35727	2.17725		1.35727	9.68602	0.21637
1.35683	0.807947	1.35712	0.878727		1.35712	3.16228	0		1.35683	2.42761	1.35712	2.23698		1.35712	9.6168	0.211776
1.3567	0.817088	1.35697	0.878865		1.35697	3.16228	0		1.35671	2.44231	1.35697	2.28661		1.35697	9.54942	0.207368
1.35658	0.823901	1.35682	0.879003		1.35682	3.16228	0		1.35658	2.44146	1.35682	2.32717		1.35682	9.48382	0.203133
1.35646	0.833809	1.35667	0.87914		1.35667	3.16228	0		1.35646	2.45066	1.35667	2.3597		1.35667	9.41991	0.199063
1.35634	0.820743	1.35653	0.879278		1.35653	3.16228	0		1.35634	2.51433	1.35653	2.38518		1.35653	9.35762	0.195148
1.35622	0.840347	1.35638	0.879416		1.35638	3.16228	0		1.35622	2.50822	1.35638	2.40446		1.35638	9.2969	0.191378
1.35609	0.820528	1.35623	0.879554		1.35623	3.16228	0		1.35609	2.51475	1.35623	2.41825		1.35623	9.23767	0.187748
1.35597	0.834193	1.35608	0.879691		1.35608	3.16228	0		1.35597	2.54141	1.35608	2.42714		1.35608	9.17988	0.184247
1.35585	0.829299	1.35593	0.879829		1.35593	3.16228	0		1.35585	2.52724	1.35593	2.43161		1.35593	9.12347	0.18087
1.35573	0.797843	1.35578	0.879966		1.35578	3.16228	0		1.35573	2.48094	1.35578	2.43201		1.35578	9.06838	0.177611
1.35561	0.812418	1.35564	0.880103		1.35564	3.16228	0		1.35561	2.43195	1.35564	2.42864		1.35564	9.01458	0.174463
1.35548	0.830885	1.35549	0.880241		1.35549	3.16228	0		1.35548	2.49038	1.35549	2.42171		1.35549	8.962	0.171421
1.35536	0.825556	1.35534	0.880378		1.35534	3.16228	0		1.35536	2.44839	1.35534	2.41138		1.35534	8.91061	0.168479
1.35524	0.830073	1.35519	0.880515		1.35519	3.16228	0		1.35524	2.43619	1.35519	2.39774		1.35519	8.86036	0.165633
1.35512	0.808699	1.35504	0.880652		1.35504	3.16228	0		1.35512	2.44818	1.35504	2.38087		1.35504	8.81121	0.162878
1.355	0.804741	1.3549	0.880789		1.3549	3.16228	0		1.355	2.39314	1.3549	2.36079		1.3549	8.76312	0.160209
1.35487	0.825263	1.35475	0.880926		1.35475	3.16228	0		1.35487	2.31426	1.35475	2.33752		1.35475	8.71605	0.157623
1.35475	0.787973	1.3546	0.881063		1.3546	3.16228	0		1.35475	2.3554	1.3546	2.31104		1.3546	8.66998	0.155116
1.35463	0.804215	1.35445	0.8812		1.35445	3.16228	0		1.35463	2.31971	1.35445	2.28132		1.35445	8.62486	0.152683
1.35451	0.815547	1.3543	0.881336		1.3543	3.16228	0		1.35451	2.29105	1.3543	2.24835		1.3543	8.58067	0.150323
1.35439	0.817413	1.35416	0.881473		1.35416	3.16228	0		1.35439	2.32534	1.35416	2.2121		1.35416	8.53737	0.148032
1.35427	0.811733	1.35401	0.88161		1.35401	3.16228	0		1.35427	2.28477	1.35401	2.17257		1.35401	8.49493	0.145805
1.35414	0.80767	1.35386	0.881746		1.35386	3.16228	0		1.35414	2.216	1.35386	2.12979		1.35386	8.45333	0.143642
1.35402	0.849687	1.35371	0.881882		1.35371	3.16228	0		1.35402	2.21639	1.35371	2.08381		1.35371	8.41255	0.141539
1.3539	0.797477	1.35356	0.882019		1.35356	3.16228	0		1.3539	2.14696	1.35356	2.03475		1.35356	8.37254	0.139494
1.35378	0.817523	1.35342	0.882155		1.35342	3.16228	0		1.35378	2.10247	1.35342	1.98278		1.35342	8.3333	0.137504
1.35366	0.827594	1.35327	0.882291		1.35327	3.16228	0		1.35366	2.02534	1.35327	1.92816		1.35327	8.29479	0.135567
1.35354	0.808616	1.35312	0.882427		1.35312	3.16228	0		1.35354	2.03293	1.35312	1.87124		1.35312	8.257	0.133681
1.35341	0.795972	1.35297	0.882563		1.35297	3.16228	0		1.35341	1.98173	1.35297	1.81246		1.35297	8.21991	0.131845
1.35329	0.821292	1.35283	0.882699		1.35283	3.16228	0		1.35329	1.9325	1.35283	1.7524		1.35283	8.18348	0.130055
1.35317	0.796436	1.35268	0.882835		1.35268	3.16228	0		1.35317	1.83132	1.35268	1.69171		1.35268	8.14771	0.12831
1.35305	0.857932	1.35253	0.882971		1.35253	3.16228	0		1.35305	1.81129	1.35253	1.6312		1.35253	8.11258	0.126608
1.35293	0.838195	1.35238	0.883107		1.35238	3.16228	0		1.35293	1.74892	1.35238	1.57174		1.35238	8.07806	0.124949
1.35281	0.840985	1.35224	0.883243		1.35224	3.16228	0		1.35281	1.67093	1.35224	1.51429		1.35224	8.04414	0.12333
1.35269	0.820163	1.35209	0.883378		1.35209	3.16228	0		1.35269	1.64671	1.35209	1.45983		1.35209	8.0108	0.12175
1.35256	0.829918	1.35194	0.883514		1.35194	3.16228	0		1.35256	1.60137	1.35194	1.40937		1.35194	7.97803	0.120207
1.35244	0.79515	1.35179	0.88365		1.35179	3.16228	0		1.35244	1.54231	1.35179	1.36385		1.35179	7.94581	0.1187
1.35232	0.784298	1.35165	0.883785		1.35165	3.16228	0		1.35232	1.51092	1.35165	1.3241		1.35165	7.91412	0.117228
1.3522	0.826351	1.3515	0.88392		1.3515	3.16228	0		1.3522	1.48339	1.3515	1.29084		1.3515	7.88296	0.11579
1.35208	0.802877	1.35135	0.884056		1.35135	3.16228	0		1.35208	1.43933	1.35135	1.26458		1.35135	7.85231	0.114385
1.35196	0.836687	1.3512	0.884191		1.3512	3.16228	0		1.35196	1.42264	1.3512	1.24562		1.3512	7.82215	0.11301
1.35184	0.793516	1.35106	0.884326		1.35106	3.16228	0		1.35184	1.35808	1.35106	1.23405		1.35106	7.79247	0.111666
1.35171	0.842693	1.35091	0.884461		1.35091	3.16228	0		1.35171	1.33936	1.35091	1.22975		1.35091	7.76326	0.110351
1.35159	0.819072	1.35076	0.884596		1.35076	3.16228	0		1.35159	1.35895	1.35076	1.23238		1.35076	7.7345	0.109065
1.35147	0.814692	1.35062	0.884731		1.35062	3.16228	0		1.35147	1.35917	1.35062	1.24145		1.35062	7.7062	0.107805
1.35135	0.831703	1.35047	0.884866		1.35047	3.16228	0		1.35135	1.32107	1.35047	1.25635		1.35047	7.67833	0.106573
1.35123	0.807133	1.35032	0.885001		1.35032	3.16228	0		1.35123	1.32854	1.35032	1.27636		1.35032	7.65088	0.105366
1.35111	0.804604	1.35017	0.885136		1.35017	3.16228	0		1.35111	1.30356	1.35017	1.30074		1.35017	7.62385	0.104184
1.35099	0.791636	1.35003	0.885271		1.35003	3.16228	0		1.35099	1.31092	1.35003	1.32872		1.35003	7.59722	0.103026
1.35087	0.821752	1.34988	0.885405		1.34988	3.16228	0		1.35087	1.3552	1.34988	1.35956		1.34988	7.57098	0.101892
1.35075	0.861329	1.34973	0.88554		1.34973	3.16228	0		1.35075	1.3416	1.34973	1.39257		1.34973	7.54513	0.10078
1.35062	0.79958	1.34959	0.885675		1.34959	3.16228	0		1.35062	1.36614	1.34959	1.4271		1.34959	7.51965	0.0996894
1.3505	0.826241	1.34944	0.885809		1.34944	3.16228	0		1.3505	1.37917	1.34944	1.4626		1.34944	7.49455	0.0986211
1.35038	0.866805	1.34929	0.885943		1.34929	3.16228	0		1.35038	1.39721	1.34929	1.49856		1.34929	7.4698	0.097573
1.35026	0.787184	1.34915	0.886078		1.34915	3.16228	0		1.35026	1.43422	1.34915	1.53457		1.34915	7.4454	0.0965449
1.35014	0.833579	1.349	0.886212		1.349	3.16228	0		1.35014	1.44242	1.349	1.57028		1.349	7.42134	0.0955367
1.35002	0.830166	1.34885	0.886346		1.34885	3.16228	0		1.35002	1.4363	1.34885	1.6054		1.34885	7.39761	0.0945467
1.3499	0.779587	1.34871	0.88648		1.34871	3.16228	0		1.3499	1.45375	1.34871	1.6397		1.34871	7.37422	0.093576
1.34978	0.796287	1.34856	0.886615		1.34856	3.16228	0		1.34978	1.54646	1.34856	1.67302		1.34856	7.35114	0.0926224
1.34966	0.819875	1.34841	0.886749		1.34841	3.16228	0		1.34966	1.5286	1.34841	1.7052		1.34841	7.32838	0.0916867
1.34954	0.81442	1.34827	0.886883		1.34827	3.16228	0		1.34954	1.57817	1.34827	1.73617		1.34827	7.30592	0.0907682
1.34941	0.832009	1.34812	0.887016		1.34812	3.16228	0		1.34942	1.63323	1.34812	1.76586		1.34812	7.28376	0.0898656
1.34929	0.825259	1.34797	0.88715		1.34797	3.16228	0		1.34929	1.63894	1.34797	1.79422		1.34797	7.2619	0.0889788
1.34917	0.839657	1.34783	0.887284		1.34783	3.16228	0		1.34917	1.67044	1.34783	1.82125		1.34783	7.24032	0.088108
1.34905	0.820405	1.34768	0.887418		1.34768	3.16228	0		1.34905	1.6863	1.34768	1.84694		1.34768	7.21902	0.0872528
1.34893	0.836042	1.34753	0.887552		1.34753	3.16228	0		1.34893	1.73061	1.34753	1.87131		1.34753	7.198	0.0864115
1.34881	0.846325	1.34739	0.887685		1.34739	3.16228	0		1.34881	1.74261	1.34739	1.89438		1.34739	7.17725	0.085585
1.34869	0.843412	1.34724	0.887819		1.34724	3.16228	0		1.34869	1.79726	1.34724	1.91618		1.34724	7.15676	0.0847723
1.34857	0.83223	1.34709	0.887952		1.34709	3.16228	0		1.34857	1.8225	1.34709	1.93675		1.34709	7.13653	0.0839736
1.34845	0.838185	1.34695	0.888086		1.34695	3.16228	0		1.34845	1.84169	1.34695	1.95612		1.34695	7.11655	0.0831878
1.34833	0.839455	1.3468	0.888219		1.3468	3.16228	0		1.34833	1.86018	1.3468	1.97434		1.3468	7.09682	0.0824158
1.34821	0.828712	1.34666	0.888352		1.34666	3.16228	0		1.34821	1.88477	1.34666	1.99145		1.34666	7.07734	0.0816557
1.34809	0.864965	1.34651	0.888485		1.34651	3.16228	0		1.34809	1.87179	1.34651	2.0075		1.34651	7.05809	0.0809079
1.34797	0.807694	1.34636	0.888618		1.34636	3.16228	0		1.34797	1.91014	1.34636	2.02253		1.34636	7.03908	0.0801725
1.34785	0.814446	1.34622	0.888752		1.34622	3.16228	0		1.34785	1.90525	1.34622	2.03658		1.34622	7.02029	0.079449
1.34773	0.801028	1.34607	0.888884		1.34607	3.16228	0		1.34773	1.93044	1.34607	2.0497		1.34607	7.00173	0.0787369
1.34761	0.821173	1.34592	0.889017		1.34592	3.16228	0		1.34761	1.97431	1.34592	2.06193		1.34592	6.98339	0.0780359
1.34748	0.845021	1.34578	0.88915		1.34578	3.16228	0		1.34748	1.99629	1.34578	2.07331		1.34578	6.96527	0.0773452
1.34736	0.825858	1.34563	0.889283		1.34563	3.16228	0		1.34736	2.00793	1.34563	2.08387		1.34563	6.94736	0.0766658
1.34724	0.824936	1.34549	0.889416		1.34549	3.16228	0		1.34724	1.97973	1.34549	2.09366		1.34549	6.92966	0.0759973
1.34712	0.850489	1.34534	0.889548		1.34534	3.16228	0		1.34712	2.0191	1.34534	2.1027		1.34534	6.91216	0.0753382
1.347	0.80368	1.34519	0.889681		1.34519	3.16228	0		1.347	2.03745	1.34519	2.11104		1.34519	6.89486	0.0746897
1.34688	0.82035	1.34505	0.889813		1.34505	3.16228	0		1.34688	2.02972	1.34505	2.1187		1.34505	6.87776	0.0740502
1.34676	0.829855	1.3449	0.889945		1.3449	3.16228	0		1.34676	2.05604	1.3449	2.12571		1.3449	6.86086	0.0734209
1.34664	0.829506	1.34476	0.890078		1.34476	3.16228	0		1.34664	2.05004	1.34476	2.1321		1.34476	6.84414	0.0728002
1.34652	0.816072	1.34461	0.89021		1.34461	3.16228	0		1.34652	2.06027	1.34461	2.1379		1.34461	6.82761	0.0721892
1.3464	0.84961	1.34446	0.890342		1.34446	3.16228	0		1.3464	2.04967	1.34446	2.14314		1.34446	6.81126	0.0715873
1.34628	0.812721	1.34432	0.890474		1.34432	3.16228	0		1.34628	2.04801	1.34432	2.14783		1.34432	6.7951	0.0709938
1.34616	0.796775	1.34417	0.890606		1.34417	3.16228	0		1.34616	2.07823	1.34417	2.152		1.34417	6.77911	0.0704083
1.34604	0.805034	1.34403	0.890737		1.34403	3.16228	0		1.34604	2.11249	1.34403	2.15567		1.34403	6.76329	0.0698321
1.34592	0.817535	1.34388	0.890869		1.34388	3.16228	0		1.34592	2.10179	1.34388	2.15886		1.34388	6.74764	0.0692634
1.3458	0.819314	1.34374	0.891001		1.34374	3.16228	0		1.3458	2.12007	1.34374	2.1616		1.34374	6.73217	0.068703
1.34568	0.81541	1.34359	0.891132		1.34359	3.16228	0		1.34568	2.09466	1.34359	2.16388		1.34359	6.71685	0.0681502
1.34556	0.865629	1.34345	0.891264		1.34345	3.16228	0		1.34556	2.12322	1.34345	2.16575		1.34345	6.7017	0.0676052
1.34544	0.802703	1.3433	0.891395		1.3433	3.16228	0		1.34544	2.09177	1.3433	2.1672		1.3433	6.68671	0.0670673
1.34532	0.784037	1.34315	0.891526		1.34315	3.16228	0		1.34532	2.10955	1.34315	2.16826		1.34315	6.67188	0.0665375
1.3452	0.851123	1.34301	0.891657		1.34301	3.16228	0		1.3452	2.1195	1.34301	2.16893		1.34301	6.6572	0.0660143
1.34508	0.838763	1.34286	0.891788		1.34286	3.16228	0		1.34508	2.13266	1.34286	2.16924		1.34286	6.64267	0.0654985
1.34496	0.879407	1.34272	0.891919		1.34272	3.16228	0		1.34496	2.11104	1.34272	2.16919		1.34272	6.62829	0.0649896
1.34484	0.821902	1.34257	0.89205		1.34257	3.16228	0		1.34484	2.14305	1.34257	2.16879		1.34257	6.61406	0.0644877
1.34472	0.842362	1.34243	0.892181		1.34243	3.16228	0		1.34472	2.13814	1.34243	2.16807		1.34243	6.59997	0.063992
1.3446	0.801253	1.34228	0.892311		1.34228	3.16228	0		1.3446	2.13408	1.34228	2.16701		1.34228	6.58602	0.0635027
1.34448	0.789261	1.34214	0.892442		1.34214	3.16228	0		1.34448	2.14696	1.34214	2.16565		1.34214	6.57221	0.0630199
1.34436	0.81493	1.34199	0.892572		1.34199	3.16228	0		1.34436	2.16072	1.34199	2.16398		1.34199	6.55854	0.0625436
1.34424	0.810479	1.34185	0.892702		1.34185	3.16228	0		1.34424	2.11191	1.34185	2.16202		1.34185	6.54501	0.0620732
1.34412	0.827051	1.3417	0.892832		1.3417	3.16228	0		1.34412	2.11965	1.3417	2.15977		1.3417	6.53161	0.0616096
1.344	0.879296	1.34156	0.892962		1.34156	3.16228	0		1.344	2.13656	1.34156	2.15725		1.34156	6.51834	0.0611513
1.34388	0.876053	1.34141	0.893092		1.34141	3.16228	0		1.34388	2.13823	1.34141	2.15445		1.34141	6.5052	0.0606984
1.34376	0.838722	1.34127	0.893222		1.34127	3.16228	0		1.34376	2.16322	1.34127	2.15139		1.34127	6.49219	0.0602517
1.34364	0.798822	1.34112	0.893352		1.34112	3.16228	0		1.34364	2.09523	1.34112	2.14807		1.34112	6.4793	0.0598105
1.34352	0.810331	1.34098	0.893481		1.34098	3.16228	0		1.34352	2.12081	1.34098	2.1445		1.34098	6.46653	0.059375
1.3434	0.848249	1.34083	0.893611		1.34083	3.16228	0		1.3434	2.1829	1.34083	2.14069		1.34083	6.45389	0.0589443
1.34328	0.814521	1.34069	0.89374		1.34069	3.16228	0		1.34328	2.1231	1.34069	2.13663		1.34069	6.44136	0.0585194
1.34316	0.847223	1.34054	0.893869		1.34054	3.16228	0		1.34316	2.10527	1.34054	2.13235		1.34054	6.42896	0.0580996
1.34304	0.83126	1.3404	0.893998		1.3404	3.16228	0		1.34304	2.09966	1.3404	2.12784		1.3404	6.41667	0.0576849
1.34292	0.827321	1.34025	0.894127		1.34025	3.16228	0		1.34292	2.12857	1.34025	2.12311		1.34025	6.40449	0.0572755
1.3428	0.805277	1.34011	0.894256		1.34011	3.16228	0		1.3428	2.15212	1.34011	2.11816		1.34011	6.39242	0.0568704
1.34268	0.799301	1.33996	0.894385		1.33996	3.16228	0		1.34268	2.18534	1.33996	2.113		1.33996	6.38047	0.0564707
1.34257	0.823677	1.33982	0.894513		1.33982	3.16228	0		1.34257	2.08698	1.33982	2.10763		1.33982	6.36863	0.0560757
1.34245	0.84882	1.33967	0.894642		1.33967	3.16228	0		1.34245	2.13193	1.33967	2.10206		1.33967	6.35689	0.0556852
1.34233	0.821806	1.33953	0.89477		1.33953	3.16228	0		1.34233	2.09316	1.33953	2.09629		1.33953	6.34526	0.0552987
1.34221	0.851627	1.33938	0.894898		1.33938	3.16228	0		1.34221	2.12704	1.33938	2.09032		1.33938	6.33374	0.0549178
1.34209	0.834016	1.33924	0.895026		1.33924	3.16228	0		1.34209	2.0934	1.33924	2.08417		1.33924	6.32232	0.0545409
1.34197	0.80976	1.33909	0.895154		1.33909	3.16228	0		1.34197	2.10552	1.33909	2.07783		1.33909	6.311	0.0541682
1.34185	0.818114	1.33895	0.895282		1.33895	3.16228	0		1.34185	2.16691	1.33895	2.07131		1.33895	6.29978	0.0537995
1.34173	0.861049	1.3388	0.89541		1.3388	3.16228	0		1.34173	2.17526	1.3388	2.06461		1.3388	6.28866	0.0534351
1.34161	0.827695	1.33866	0.895537		1.33866	3.16228	0		1.34161	2.143	1.33866	2.05774		1.33866	6.27763	0.0530758
1.34149	0.82344	1.33851	0.895665		1.33851	3.16228	0		1.34149	2.09438	1.33851	2.05069		1.33851	6.2667	0.0527191
1.34137	0.845069	1.33837	0.895792		1.33837	3.16228	0		1.34137	2.12926	1.33837	2.04348		1.33837	6.25587	0.0523676
1.34125	0.816028	1.33823	0.895919		1.33823	3.16228	0		1.34125	2.13385	1.33823	2.03611		1.33823	6.24513	0.0520197
1.34113	0.835329	1.33808	0.896046		1.33808	3.16228	0		1.34113	2.11641	1.33808	2.02857		1.33808	6.23449	0.0516755
1.34101	0.858532	1.33794	0.896173		1.33794	3.16228	0		1.34101	2.19987	1.33794	2.02088		1.33794	6.22393	0.0513349
1.34089	0.870319	1.33779	0.896299		1.33779	3.16228	0		1.34089	2.14174	1.33779	2.01304		1.33779	6.21346	0.0509981
1.34077	0.856719	1.33765	0.896426		1.33765	3.16228	0		1.34077	2.13619	1.33765	2.00504		1.33765	6.20309	0.0506659
1.34066	0.86916	1.3375	0.896552		1.3375	3.16228	0		1.34066	2.14371	1.3375	1.9969		1.3375	6.1928	0.0503367
1.34054	0.840959	1.33736	0.896679		1.33736	3.16228	0		1.34054	2.14376	1.33736	1.98862		1.33736	6.18259	0.0500106
1.34042	0.830496	1.33722	0.896805		1.33722	3.16228	0		1.34042	2.17128	1.33722	1.9802		1.33722	6.17247	0.0496883
1.3403	0.77447	1.33707	0.896931		1.33707	3.16228	0		1.3403	2.17101	1.33707	1.97165		1.33707	6.16244	0.0493701
1.34018	0.813484	1.33693	0.897056		1.33693	3.16228	0		1.34018	2.20477	1.33693	1.96296		1.33693	6.15249	0.049055
1.34006	0.837515	1.33678	0.897182		1.33678	3.16228	0		1.34006	2.17834	1.33678	1.95415		1.33678	6.14262	0.0487431
1.33994	0.836287	1.33664	0.897307		1.33664	3.16228	0		1.33994	2.11318	1.33664	1.9452		1.33664	6.13283	0.0484344
1.33982	0.806008	1.33649	0.897433		1.33649	3.16228	0		1.33982	2.16491	1.33649	1.93614		1.33649	6.12312	0.0481291
1.3397	0.839219	1.33635	0.897558		1.33635	3.16228	0		1.3397	2.14643	1.33635	1.92696		1.33635	6.11349	0.0478262
1.33958	0.806809	1.33621	0.897683		1.33621	3.16228	0		1.33958	2.12276	1.33621	1.91767		1.33621	6.10393	0.0475275
1.33946	0.794321	1.33606	0.897808		1.33606	3.16228	0		1.33947	2.12808	1.33606	1.90826		1.33606	6.09446	0.0472314
1.33935	0.825748	1.33592	0.897932		1.33592	3.16228	0		1.33935	2.10789	1.33592	1.89875		1.33592	6.08506	0.0469388
1.33923	0.850559	1.33578	0.898057		1.33578	3.16228	0		1.33923	2.13533	1.33578	1.88913		1.33578	6.07573	0.0466487
1.33911	0.847676	1.33563	0.898181		1.33563	3.16228	0		1.33911	2.19553	1.33563	1.87941		1.33563	6.06648	0.0463622
1.33899	0.779957	1.33549	0.898306		1.33549	3.16228	0		1.33899	2.13742	1.33549	1.8696		1.33549	6.0573	0.0460783
1.33887	0.812291	1.33534	0.89843		1.33534	3.16228	0		1.33887	2.12336	1.33534	1.85969		1.33534	6.04819	0.0457972
1.33875	0.830336	1.3352	0.898554		1.3352	3.16228	0		1.33875	2.15593	1.3352	1.8497		1.3352	6.03916	0.0455188
1.33863	0.865275	1.33506	0.898677		1.33506	3.16228	0		1.33863	2.10165	1.33506	1.83962		1.33506	6.03019	0.045244
1.33851	0.828673	1.33491	0.898801		1.33491	3.16228	0		1.33851	2.1347	1.33491	1.82946		1.33491	6.02129	0.0449712
1.3384	0.809609	1.33477	0.898924		1.33477	3.16228	0		1.3384	2.11267	1.33477	1.81922		1.33477	6.01246	0.0447013
1.33828	0.864817	1.33462	0.899048		1.33462	3.16228	0		1.33828	2.09009	1.33462	1.80891		1.33462	6.0037	0.0444342
1.33816	0.827649	1.33448	0.899171		1.33448	3.16228	0		1.33816	2.11688	1.33448	1.79853		1.33448	5.99501	0.0441692
1.33804	0.825063	1.33434	0.899293		1.33434	3.16228	0		1.33804	2.1199	1.33434	1.78808		1.33434	5.98638	0.0439071
1.33792	0.863588	1.33419	0.899416		1.33419	3.16228	0		1.33792	2.08377	1.33419	1.77757		1.33419	5.97782	0.043648
1.3378	0.830819	1.33405	0.899539		1.33405	3.16228	0		1.3378	2.07646	1.33405	1.767		1.33405	5.96932	0.043391
1.33768	0.816542	1.33391	0.899661		1.33391	3.16228	0		1.33768	2.13187	1.33391	1.75639		1.33391	5.96089	0.043137
1.33756	0.843469	1.33376	0.899783		1.33376	3.16228	0		1.33756	2.13632	1.33376	1.74572		1.33376	5.95252	0.0428844
1.33745	0.832018	1.33362	0.899905		1.33362	3.16228	0		1.33745	2.08263	1.33362	1.73501		1.33362	5.94421	0.0426356
1.33733	0.86041	1.33348	0.900027		1.33348	3.16228	0		1.33733	2.15057	1.33348	1.72425		1.33348	5.93596	0.0423882
1.33721	0.840248	1.33333	0.900149		1.33333	3.16228	0		1.33721	2.06569	1.33333	1.71346		1.33333	5.92778	0.0421431
1.33709	0.847876	1.33319	0.90027		1.33319	3.16228	0		1.33709	2.09899	1.33319	1.70264		1.33319	5.91965	0.0419011
1.33697	0.816746	1.33305	0.900392		1.33305	3.16228	0		1.33697	2.06073	1.33305	1.69179		1.33305	5.91158	0.0416606
1.33685	0.83077	1.3329	0.900513		1.3329	3.16228	0		1.33685	2.08927	1.3329	1.68092		1.3329	5.90357	0.0414232
1.33673	0.872093	1.33276	0.900634		1.33276	3.16228	0		1.33674	2.08519	1.33276	1.67002		1.33276	5.89562	0.0411873
1.33662	0.81737	1.33262	0.900755		1.33262	3.16228	0		1.33662	2.07218	1.33262	1.65912		1.33262	5.88773	0.0409538
1.3365	0.829003	1.33247	0.900875		1.33247	3.16228	0		1.3365	2.06227	1.33247	1.6482		1.33247	5.8799	0.0407227
1.33638	0.859882	1.33233	0.900996		1.33233	3.16228	0		1.33638	2.05025	1.33233	1.63728		1.33233	5.87212	0.0404939
1.33626	0.831595	1.33219	0.901116		1.33219	3.16228	0		1.33626	2.06557	1.33219	1.62635		1.33219	5.86439	0.0402668
1.33614	0.857884	1.33204	0.901236		1.33204	3.16228	0		1.33614	2.05911	1.33204	1.61543		1.33204	5.85672	0.040042
1.33602	0.86258	1.3319	0.901356		1.3319	3.16228	0		1.33602	2.02107	1.3319	1.60451		1.3319	5.84911	0.0398189
1.33591	0.860937	1.33176	0.901476		1.33176	3.16228	0		1.33591	2.01674	1.33176	1.59361		1.33176	5.84155	0.0395983
1.33579	0.825471	1.33162	0.901596		1.33162	3.16228	0		1.33579	2.01497	1.33162	1.58272		1.33162	5.83404	0.0393792
1.33567	0.866917	1.33147	0.901715		1.33147	3.16228	0		1.33567	1.96932	1.33147	1.57185		1.33147	5.82658	0.0391628
1.33555	0.857452	1.33133	0.901835		1.33133	3.16228	0		1.33555	1.98114	1.33133	1.56101		1.33133	5.81918	0.0389479
1.33543	0.837583	1.33119	0.901954		1.33119	3.16228	0		1.33543	1.98488	1.33119	1.55019		1.33119	5.81183	0.0387348
1.33532	0.82702	1.33104	0.902073		1.33104	3.16228	0		1.33532	2.00887	1.33104	1.53941		1.33104	5.80452	0.0385234
1.3352	0.878054	1.3309	0.902192		1.3309	3.16228	0		1.3352	2.02858	1.3309	1.52867		1.3309	5.79727	0.0383146
1.33508	0.832159	1.33076	0.902311		1.33076	3.16228	0		1.33508	1.95121	1.33076	1.51797		1.33076	5.79007	0.0381075
1.33496	0.886329	1.33061	0.902429		1.33061	3.16228	0		1.33496	1.93499	1.33061	1.50731		1.33061	5.78292	0.0379022
1.33484	0.839676	1.33047	0.902548		1.33047	3.16228	0		1.33484	1.94988	1.33047	1.49671		1.33047	5.77581	0.0376986
1.33472	0.816932	1.33033	0.902666		1.33033	3.16228	0		1.33472	1.93738	1.33033	1.48616		1.33033	5.76876	0.0374968
1.33461	0.853837	1.33019	0.902784		1.33019	3.16228	0		1.33461	1.9372	1.33019	1.47566		1.33019	5.76175	0.0372968
1.33449	0.847186	1.33004	0.902902		1.33004	3.16228	0		1.33449	1.90874	1.33004	1.46524		1.33004	5.75479	0.0370978
1.33437	0.845996	1.3299	0.90302		1.3299	3.16228	0		1.33437	1.89989	1.3299	1.45487		1.3299	5.74787	0.0369015
1.33425	0.826237	1.32976	0.903138		1.32976	3.16228	0		1.33425	1.89443	1.32976	1.44458		1.32976	5.741	0.036707
1.33413	0.821327	1.32962	0.903256		1.32962	3.16228	0		1.33413	1.89874	1.32962	1.43437		1.32962	5.73418	0.0365135
1.33402	0.84971	1.32947	0.903373		1.32947	3.16228	0		1.33402	1.85803	1.32947	1.42423		1.32947	5.7274	0.0363219
1.3339	0.845165	1.32933	0.90349		1.32933	3.16228	0		1.3339	1.88874	1.32933	1.41417		1.32933	5.72067	0.0361321
1.33378	0.866392	1.32919	0.903608		1.32919	3.16228	0		1.33378	1.85988	1.32919	1.4042		1.32919	5.71398	0.0359434
1.33366	0.865972	1.32905	0.903725		1.32905	3.16228	0		1.33366	1.88571	1.32905	1.39432		1.32905	5.70734	0.0357566
1.33354	0.829492	1.3289	0.903842		1.3289	3.16228	0		1.33355	1.80579	1.3289	1.38453		1.3289	5.70073	0.0355717
1.33343	0.837331	1.32876	0.903959		1.32876	3.16228	0		1.33343	1.8661	1.32876	1.37484		1.32876	5.69418	0.0353888
1.33331	0.814118	1.32862	0.904075		1.32862	3.16228	0		1.33331	1.8125	1.32862	1.36525		1.32862	5.68766	0.035206
1.33319	0.865801	1.32848	0.904192		1.32848	3.16228	0		1.33319	1.8401	1.32848	1.35577		1.32848	5.68119	0.0350261
1.33307	0.816551	1.32833	0.904309		1.32833	3.16228	0		1.33307	1.77428	1.32833	1.34638		1.32833	5.67475	0.0348473
1.33296	0.829952	1.32819	0.904425		1.32819	3.16228	0		1.33296	1.81289	1.32819	1.33711		1.32819	5.66836	0.0346696
1.33284	0.814698	1.32805	0.904541		1.32805	3.16228	0		1.33284	1.79825	1.32805	1.32795		1.32805	5.66201	0.034493
1.33272	0.835939	1.32791	0.904658		1.32791	3.16228	0		1.33272	1.81192	1.32791	1.31891		1.32791	5.6557	0.0343185
1.3326	0.847415	1.32777	0.904774		1.32777	3.16228	0		1.3326	1.77995	1.32777	1.30998		1.32777	5.64943	0.0341459
1.33248	0.832022	1.32762	0.90489		1.32762	3.16228	0		1.33249	1.78638	1.32762	1.30118		1.32762	5.6432	0.0339745
1.33237	0.846252	1.32748	0.905005		1.32748	3.16228	0		1.33237	1.72138	1.32748	1.29249		1.32748	5.63701	0.0338034
1.33225	0.888869	1.32734	0.905121		1.32734	3.16228	0		1.33225	1.75208	1.32734	1.28394		1.32734	5.63085	0.0336352
1.33213	0.817591	1.3272	0.905237		1.3272	3.16228	0		1.33213	1.72838	1.3272	1.27551		1.3272	5.62474	0.0334673
1.33201	0.871342	1.32705	0.905352		1.32705	3.16228	0		1.33201	1.70225	1.32705	1.26721		1.32705	5.61866	0.0333015
1.3319	0.817682	1.32691	0.905468		1.32691	3.16228	0		1.3319	1.71428	1.32691	1.25905		1.32691	5.61263	0.033136
1.33178	0.833798	1.32677	0.905583		1.32677	3.16228	0		1.33178	1.69278	1.32677	1.25102		1.32677	5.60662	0.0329726
1.33166	0.858106	1.32663	0.905698		1.32663	3.16228	0		1.33166	1.70564	1.32663	1.24312		1.32663	5.60066	0.0328104
1.33154	0.84123	1.32649	0.905814		1.32649	3.16228	0		1.33154	1.69927	1.32649	1.23536		1.32649	5.59473	0.0326495
1.33143	0.870313	1.32635	0.905929		1.32635	3.16228	0		1.33143	1.70062	1.32635	1.22775		1.32635	5.58884	0.0324897
1.33131	0.838995	1.3262	0.906044		1.3262	3.16228	0		1.33131	1.6461	1.3262	1.22027		1.3262	5.58299	0.0323322
1.33119	0.842585	1.32606	0.906158		1.32606	3.16228	0		1.33119	1.63545	1.32606	1.21294		1.32606	5.57716	0.032175
1.33107	0.843895	1.32592	0.906273		1.32592	3.16228	0		1.33107	1.65459	1.32592	1.20575		1.32592	5.57138	0.032019
1.33096	0.833063	1.32578	0.906388		1.32578	3.16228	0		1.33096	1.63345	1.32578	1.1987		1.32578	5.56563	0.0318643
1.33084	0.838075	1.32564	0.906502		1.32564	3.16228	0		1.33084	1.65081	1.32564	1.1918		1.32564	5.55992	0.0317109
1.33072	0.829619	1.32549	0.906617		1.32549	3.16228	0		1.33072	1.63417	1.32549	1.18505		1.32549	5.55423	0.0315588
1.33061	0.857297	1.32535	0.906731		1.32535	3.16228	0		1.33061	1.59371	1.32535	1.17845		1.32535	5.54859	0.0314071
1.33049	0.82898	1.32521	0.906846		1.32521	3.16228	0		1.33049	1.60753	1.32521	1.172		1.32521	5.54297	0.0312576
1.33037	0.843679	1.32507	0.90696		1.32507	3.16228	0		1.33037	1.56609	1.32507	1.16569		1.32507	5.53739	0.0311094
1.33025	0.874308	1.32493	0.907074		1.32493	3.16228	0		1.33025	1.58334	1.32493	1.15954		1.32493	5.53185	0.0309616
1.33014	0.828613	1.32479	0.907188		1.32479	3.16228	0		1.33014	1.60723	1.32479	1.15353		1.32479	5.52633	0.0308152
1.33002	0.834797	1.32464	0.907302		1.32464	3.16228	0		1.33002	1.56602	1.32464	1.14768		1.32464	5.52085	0.0306701
1.3299	0.892832	1.3245	0.907416		1.3245	3.16228	0		1.3299	1.5609	1.3245	1.14197		1.3245	5.5154	0.0305254
1.32978	0.869608	1.32436	0.90753		1.32436	3.16228	0		1.32978	1.58573	1.32436	1.13642		1.32436	5.50998	0.0303821
1.32967	0.859308	1.32422	0.907644		1.32422	3.16228	0		1.32967	1.54672	1.32422	1.13101		1.32422	5.50459	0.0302402
1.32955	0.863126	1.32408	0.907758		1.32408	3.16228	0		1.32955	1.5113	1.32408	1.12576		1.32408	5.49924	0.0300996
1.32943	0.860141	1.32394	0.907872		1.32394	3.16228	0		1.32943	1.52393	1.32394	1.12066		1.32394	5.49391	0.0299595
1.32932	0.844114	1.3238	0.907985		1.3238	3.16228	0		1.32932	1.50807	1.3238	1.11571		1.3238	5.48862	0.0298208
1.3292	0.866012	1.32365	0.908099		1.32365	3.16228	0		1.3292	1.4932	1.32365	1.1109		1.32365	5.48336	0.0296825
1.32908	0.892544	1.32351	0.908212		1.32351	3.16228	0		1.32908	1.496	1.32351	1.10625		1.32351	5.47812	0.0295466
1.32897	0.824406	1.32337	0.908326		1.32337	3.16228	0		1.32897	1.47136	1.32337	1.10174		1.32337	5.47292	0.0294103
1.32885	0.823587	1.32323	0.908439		1.32323	3.16228	0		1.32885	1.47683	1.32323	1.09738		1.32323	5.46775	0.0292753
1.32873	0.887282	1.32309	0.908553		1.32309	3.16228	0		1.32873	1.45027	1.32309	1.09317		1.32309	5.4626	0.0291418
1.32861	0.830121	1.32295	0.908666		1.32295	3.16228	0		1.32861	1.46484	1.32295	1.08911		1.32295	5.45749	0.0290097
1.3285	0.808727	1.32281	0.908779		1.32281	3.16228	0		1.3285	1.45423	1.32281	1.08519		1.32281	5.4524	0.0288772
1.32838	0.873483	1.32267	0.908892		1.32267	3.16228	0		1.32838	1.44256	1.32267	1.08141		1.32267	5.44734	0.0287471
1.32826	0.842895	1.32253	0.909006		1.32253	3.16228	0		1.32826	1.4304	1.32253	1.07778		1.32253	5.44231	0.0286165
1.32815	0.814085	1.32238	0.909119		1.32238	3.16228	0		1.32815	1.40845	1.32238	1.07429		1.32238	5.43731	0.0284884
1.32803	0.887642	1.32224	0.909232		1.32224	3.16228	0		1.32803	1.3976	1.32224	1.07093		1.32224	5.43234	0.0283598
1.32791	0.862626	1.3221	0.909345		1.3221	3.16228	0		1.32791	1.42374	1.3221	1.06772		1.3221	5.42739	0.0282327
1.3278	0.874279	1.32196	0.909458		1.32196	3.16228	0		1.3278	1.37953	1.32196	1.06465		1.32196	5.42247	0.0281071
1.32768	0.859118	1.32182	0.909571		1.32182	3.16228	0		1.32768	1.37789	1.32182	1.06171		1.32182	5.41758	0.0279821
1.32756	0.857512	1.32168	0.909683		1.32168	3.16228	0		1.32756	1.37758	1.32168	1.05891		1.32168	5.41271	0.0278576
1.32745	0.881219	1.32154	0.909796		1.32154	3.16228	0		1.32745	1.3621	1.32154	1.05624		1.32154	5.40788	0.0277336
1.32733	0.861787	1.3214	0.909909		1.3214	3.16228	0		1.32733	1.35503	1.3214	1.0537		1.3214	5.40306	0.0276112
1.32721	0.845649	1.32126	0.910022		1.32126	3.16228	0		1.32721	1.35292	1.32126	1.0513		1.32126	5.39828	0.0274893
1.3271	0.824005	1.32112	0.910135		1.32112	3.16228	0		1.3271	1.34431	1.32112	1.04902		1.32112	5.39352	0.027369
1.32698	0.873322	1.32098	0.910247		1.32098	3.16228	0		1.32698	1.33637	1.32098	1.04687		1.32098	5.38878	0.0272492
1.32686	0.871518	1.32084	0.91036		1.32084	3.16228	0		1.32686	1.29902	1.32084	1.04484		1.32084	5.38408	0.02713
1.32675	0.848818	1.32069	0.910472		1.32069	3.16228	0		1.32675	1.31226	1.32069	1.04294		1.32069	5.37939	0.0270114
1.32663	0.851887	1.32055	0.910585		1.32055	3.16228	0		1.32663	1.29813	1.32055	1.04116		1.32055	5.37473	0.0268944
1.32651	0.829849	1.32041	0.910698		1.32041	3.16228	0		1.32651	1.29849	1.32041	1.0395		1.32041	5.3701	0.0267779
1.3264	0.850154	1.32027	0.91081		1.32027	3.16228	0		1.3264	1.26859	1.32027	1.03796		1.32027	5.36549	0.026662
1.32628	0.837907	1.32013	0.910923		1.32013	3.16228	0		1.32628	1.28108	1.32013	1.03653		1.32013	5.36091	0.0265468
1.32616	0.827523	1.31999	0.911035		1.31999	3.16228	0		1.32616	1.26923	1.31999	1.03522		1.31999	5.35635	0.0264331
1.32605	0.840844	1.31985	0.911148		1.31985	3.16228	0		1.32605	1.25246	1.31985	1.03402		1.31985	5.35181	0.0263191
1.32593	0.837593	1.31971	0.91126		1.31971	3.16228	0		1.32593	1.26793	1.31971	1.03293		1.31971	5.3473	0.0262067
1.32581	0.835281	1.31957	0.911373		1.31957	3.16228	0		1.32581	1.2404	1.31957	1.03195		1.31957	5.34282	0.0260949
1.3257	0.852787	1.31943	0.911485		1.31943	3.16228	0		1.3257	1.24187	1.31943	1.03108		1.31943	5.33835	0.0259837
1.32558	0.810537	1.31929	0.911597		1.31929	3.16228	0		1.32558	1.22394	1.31929	1.03031		1.31929	5.33391	0.0258741
1.32546	0.836912	1.31915	0.91171		1.31915	3.16228	0		1.32547	1.22784	1.31915	1.02964		1.31915	5.32949	0.0257642
1.32535	0.816573	1.31901	0.911822		1.31901	3.16228	0		1.32535	1.21169	1.31901	1.02908		1.31901	5.3251	0.0256549
1.32523	0.845193	1.31887	0.911935		1.31887	3.16228	0		1.32523	1.20707	1.31887	1.02861		1.31887	5.32073	0.0255473
1.32512	0.831958	1.31873	0.912047		1.31873	3.16228	0		1.32512	1.2053	1.31873	1.02824		1.31873	5.31638	0.0254403
1.325	0.846909	1.31859	0.912159		1.31859	3.16228	0		1.325	1.18444	1.31859	1.02797		1.31859	5.31205	0.025333
1.32488	0.866319	1.31845	0.912272		1.31845	3.16228	0		1.32488	1.20598	1.31845	1.02779		1.31845	5.30774	0.0252273
1.32477	0.903656	1.31831	0.912384		1.31831	3.16228	0		1.32477	1.20078	1.31831	1.02769		1.31831	5.30346	0.0251223
1.32465	0.851266	1.31817	0.912496		1.31817	3.16228	0		1.32465	1.17152	1.31817	1.02769		1.31817	5.2992	0.0250179
1.32453	0.871194	1.31803	0.912609		1.31803	3.16228	0		1.32453	1.19453	1.31803	1.02777		1.31803	5.29496	0.0249143
1.32442	0.896993	1.31789	0.912721		1.31789	3.16228	0		1.32442	1.17104	1.31789	1.02794		1.31789	5.29074	0.0248113
1.3243	0.862415	1.31775	0.912833		1.31775	3.16228	0		1.3243	1.16877	1.31775	1.0282		1.31775	5.28655	0.0247089
1.32419	0.88039	1.31761	0.912945		1.31761	3.16228	0		1.32419	1.16391	1.31761	1.02853		1.31761	5.28237	0.0246073
1.32407	0.857369	1.31747	0.913057		1.31747	3.16228	0		1.32407	1.17088	1.31747	1.02894		1.31747	5.27822	0.0245054
1.32395	0.858806	1.31733	0.91317		1.31733	3.16228	0		1.32395	1.15793	1.31733	1.02943		1.31733	5.27408	0.0244052
1.32384	0.851571	1.31719	0.913282		1.31719	3.16228	0		1.32384	1.14967	1.31719	1.02999		1.31719	5.26997	0.0243056
1.32372	0.85248	1.31705	0.913394		1.31705	3.16228	0		1.32372	1.12993	1.31705	1.03063		1.31705	5.26588	0.0242068
1.32361	0.816845	1.31691	0.913506		1.31691	3.16228	0		1.32361	1.15655	1.31691	1.03134		1.31691	5.26181	0.0241086
1.32349	0.851626	1.31677	0.913618		1.31677	3.16228	0		1.32349	1.15401	1.31677	1.03212		1.31677	5.25776	0.0240102
1.32337	0.840823	1.31663	0.91373		1.31663	3.16228	0		1.32337	1.12048	1.31663	1.03296		1.31663	5.25373	0.0239135
1.32326	0.892292	1.31649	0.913842		1.31649	3.16228	0		1.32326	1.13166	1.31649	1.03387		1.31649	5.24971	0.0238165
1.32314	0.8466	1.31635	0.913954		1.31635	3.16228	0		1.32314	1.1554	1.31635	1.03485		1.31635	5.24572	0.0237212
1.32303	0.870283	1.31621	0.914066		1.31621	3.16228	0		1.32303	1.12927	1.31621	1.03589		1.31621	5.24175	0.0236257
1.32291	0.874671	1.31607	0.914178		1.31607	3.16228	0		1.32291	1.119	1.31607	1.03699		1.31607	5.2378	0.0235309
1.32279	0.871461	1.31593	0.91429		1.31593	3.16228	0		1.32279	1.10697	1.31593	1.03815		1.31593	5.23386	0.0234368
1.32268	0.895034	1.31579	0.914402		1.31579	3.16228	0		1.32268	1.09508	1.31579	1.03936		1.31579	5.22995	0.0233434
1.32256	0.830004	1.31565	0.914513		1.31565	3.16228	0		1.32256	1.11914	1.31565	1.04063		1.31565	5.22605	0.0232508
1.32245	0.867605	1.31551	0.914625		1.31551	3.16228	0		1.32245	1.08091	1.31551	1.04195		1.31551	5.22218	0.0231589
1.32233	0.824301	1.31537	0.914737		1.31537	3.16228	0		1.32233	1.10198	1.31537	1.04333		1.31537	5.21832	0.0230668
1.32222	0.825954	1.31523	0.914849		1.31523	3.16228	0		1.32222	1.06381	1.31523	1.04476		1.31523	5.21448	0.0229764
1.3221	0.783964	1.31509	0.91496		1.31509	3.16228	0		1.3221	1.1048	1.31509	1.04623		1.31509	5.21066	0.0228858
1.32198	0.858707	1.31495	0.915072		1.31495	3.16228	0		1.32198	1.05845	1.31495	1.04776		1.31495	5.20686	0.0227959
1.32187	0.878359	1.31481	0.915183		1.31481	3.16228	0		1.32187	1.10491	1.31481	1.04932		1.31481	5.20308	0.0227068
1.32175	0.861024	1.31467	0.915295		1.31467	3.16228	0		1.32175	1.07007	1.31467	1.05094		1.31467	5.19931	0.0226174
1.32164	0.810093	1.31453	0.915406		1.31453	3.16228	0		1.32164	1.08491	1.31453	1.05259		1.31453	5.19556	0.0225298
1.32152	0.895596	1.31439	0.915518		1.31439	3.16228	0		1.32152	1.10485	1.31439	1.05429		1.31439	5.19183	0.022442
1.32141	0.855694	1.31426	0.915629		1.31426	3.16228	0		1.32141	1.05663	1.31426	1.05603		1.31426	5.18812	0.0223549
1.32129	0.891179	1.31412	0.915741		1.31412	3.16228	0		1.32129	1.0762	1.31412	1.0578		1.31412	5.18442	0.0222677
1.32117	0.831934	1.31398	0.915852		1.31398	3.16228	0		1.32117	1.06813	1.31398	1.05961		1.31398	5.18075	0.0221821
1.32106	0.868811	1.31384	0.915963		1.31384	3.16228	0		1.32106	1.04314	1.31384	1.06146		1.31384	5.17709	0.0220964
1.32094	0.872831	1.3137	0.916074		1.3137	3.16228	0		1.32094	1.07193	1.3137	1.06334		1.3137	5.17344	0.0220114
1.32083	0.844836	1.31356	0.916186		1.31356	3.16228	0		1.32083	1.05018	1.31356	1.06526		1.31356	5.16982	0.0219273
1.32071	0.835576	1.31342	0.916297		1.31342	3.16228	0		1.32071	1.07573	1.31342	1.06721		1.31342	5.16621	0.0218429
1.3206	0.860307	1.31328	0.916408		1.31328	3.16228	0		1.3206	1.06268	1.31328	1.06918		1.31328	5.16262	0.0217593
1.32048	0.911218	1.31314	0.916519		1.31314	3.16228	0		1.32048	1.04738	1.31314	1.07119		1.31314	5.15904	0.0216765
1.32037	0.888081	1.313	0.91663		1.313	3.16228	0		1.32037	1.06294	1.313	1.07323		1.313	5.15548	0.0215945
1.32025	0.865797	1.31286	0.916741		1.31286	3.16228	0		1.32025	1.06167	1.31286	1.07529		1.31286	5.15194	0.0215123
1.32014	0.799263	1.31272	0.916851		1.31272	3.16228	0		1.32014	1.07524	1.31272	1.07737		1.31272	5.14841	0.0214309
1.32002	0.852374	1.31259	0.916962		1.31259	3.16228	0		1.32002	1.03444	1.31259	1.07949		1.31259	5.1449	0.0213503
1.3199	0.857145	1.31245	0.917073		1.31245	3.16228	0		1.3199	1.03403	1.31245	1.08162		1.31245	5.14141	0.0212695
1.31979	0.864847	1.31231	0.917184		1.31231	3.16228	0		1.31979	1.03909	1.31231	1.08378		1.31231	5.13793	0.0211895
1.31967	0.837419	1.31217	0.917294		1.31217	3.16228	0		1.31967	1.04365	1.31217	1.08596		1.31217	5.13447	0.0211103
1.31956	0.841243	1.31203	0.917405		1.31203	3.16228	0		1.31956	1.03586	1.31203	1.08815		1.31203	5.13102	0.0210309
1.31944	0.85942	1.31189	0.917515		1.31189	3.16228	0		1.31944	1.02682	1.31189	1.09037		1.31189	5.12759	0.0209533
1.31933	0.877219	1.31175	0.917626		1.31175	3.16228	0		1.31933	1.05962	1.31175	1.09261		1.31175	5.12417	0.0208746
1.31921	0.830858	1.31161	0.917736		1.31161	3.16228	0		1.31921	1.02284	1.31161	1.09486		1.31161	5.12077	0.0207976
1.3191	0.850421	1.31148	0.917846		1.31148	3.16228	0		1.3191	1.01682	1.31148	1.09713		1.31148	5.11739	0.0207205
1.31898	0.873034	1.31134	0.917957		1.31134	3.16228	0		1.31898	1.01597	1.31134	1.09941		1.31134	5.11402	0.0206432
1.31887	0.876924	1.3112	0.918067		1.3112	3.16228	0		1.31887	1.04667	1.3112	1.10171		1.3112	5.11067	0.0205678
1.31875	0.854545	1.31106	0.918177		1.31106	3.16228	0		1.31875	1.03585	1.31106	1.10402		1.31106	5.10733	0.0204911
1.31864	0.846892	1.31092	0.918287		1.31092	3.16228	0		1.31864	1.03851	1.31092	1.10635		1.31092	5.104	0.0204163
1.31852	0.886112	1.31078	0.918397		1.31078	3.16228	0		1.31852	1.02396	1.31078	1.10868		1.31078	5.10069	0.0203414
1.31841	0.860253	1.31064	0.918507		1.31064	3.16228	0		1.31841	1.03693	1.31064	1.11103		1.31064	5.0974	0.0202672
1.31829	0.896212	1.31051	0.918617		1.31051	3.16228	0		1.31829	1.02719	1.31051	1.11339		1.31051	5.09412	0.0201929
1.31818	0.824043	1.31037	0.918726		1.31037	3.16228	0		1.31818	1.02129	1.31037	1.11575		1.31037	5.09085	0.0201194
1.31806	0.872044	1.31023	0.918836		1.31023	3.16228	0		1.31806	1.01536	1.31023	1.11813		1.31023	5.0876	0.0200468
1.31795	0.851731	1.31009	0.918946		1.31009	3.16228	0		1.31795	1.04909	1.31009	1.12051		1.31009	5.08436	0.019974
1.31783	0.865974	1.30995	0.919055		1.30995	3.16228	0		1.31783	0.996327	1.30995	1.1229		1.30995	5.08114	0.019901
1.31772	0.890751	1.30981	0.919165		1.30981	3.16228	0		1.31772	1.03439	1.30981	1.1253		1.30981	5.07793	0.0198299
1.3176	0.891511	1.30967	0.919274		1.30967	3.16228	0		1.3176	1.03963	1.30967	1.1277		1.30967	5.07474	0.0197587
1.31749	0.859805	1.30954	0.919383		1.30954	3.16228	0		1.31749	1.02837	1.30954	1.13011		1.30954	5.07155	0.0196873
1.31737	0.907806	1.3094	0.919493		1.3094	3.16228	0		1.31737	1.03862	1.3094	1.13252		1.3094	5.06839	0.0196167
1.31726	0.897639	1.30926	0.919602		1.30926	3.16228	0		1.31726	1.02397	1.30926	1.13494		1.30926	5.06523	0.019546
1.31714	0.860712	1.30912	0.919711		1.30912	3.16228	0		1.31714	1.03041	1.30912	1.13736		1.30912	5.06209	0.0194761
1.31703	0.945768	1.30898	0.91982		1.30898	3.16228	0		1.31703	1.05401	1.30898	1.13978		1.30898	5.05897	0.0194071
1.31691	0.884511	1.30885	0.919929		1.30885	3.16228	0		1.31691	1.03698	1.30885	1.1422		1.30885	5.05585	0.019338
1.3168	0.842814	1.30871	0.920038		1.30871	3.16228	0		1.3168	1.02025	1.30871	1.14463		1.30871	5.05275	0.0192697
1.31668	0.807977	1.30857	0.920146		1.30857	3.16228	0		1.31668	1.04514	1.30857	1.14705		1.30857	5.04967	0.0192013
1.31657	0.864409	1.30843	0.920255		1.30843	3.16228	0		1.31657	1.06343	1.30843	1.14948		1.30843	5.0466	0.0191337
1.31645	0.866829	1.30829	0.920364		1.30829	3.16228	0		1.31645	1.04111	1.30829	1.15191		1.30829	5.04354	0.019066
1.31634	0.81561	1.30815	0.920472		1.30815	3.16228	0		1.31634	1.03948	1.30815	1.15433		1.30815	5.04049	0.0189991
1.31622	0.85631	1.30802	0.920581		1.30802	3.16228	0		1.31622	1.05287	1.30802	1.15676		1.30802	5.03746	0.0189322
1.31611	0.850888	1.30788	0.920689		1.30788	3.16228	0		1.31611	1.03024	1.30788	1.15918		1.30788	5.03443	0.0188661
1.316	0.833557	1.30774	0.920797		1.30774	3.16228	0		1.316	1.02113	1.30774	1.1616		1.30774	5.03143	0.0187998
1.31588	0.858101	1.3076	0.920905		1.3076	3.16228	0		1.31588	1.02964	1.3076	1.16402		1.3076	5.02843	0.0187345
1.31577	0.898897	1.30747	0.921013		1.30747	3.16228	0		1.31577	1.05218	1.30747	1.16644		1.30747	5.02545	0.018669
1.31565	0.855279	1.30733	0.921121		1.30733	3.16228	0		1.31565	1.03315	1.30733	1.16885		1.30733	5.02248	0.0186044
1.31554	0.876593	1.30719	0.921229		1.30719	3.16228	0		1.31554	1.06298	1.30719	1.17126		1.30719	5.01952	0.0185396
1.31542	0.856671	1.30705	0.921337		1.30705	3.16228	0		1.31542	1.0547	1.30705	1.17366		1.30705	5.01657	0.0184758
1.31531	0.856206	1.30691	0.921445		1.30691	3.16228	0		1.31531	1.02421	1.30691	1.17606		1.30691	5.01364	0.0184118
1.31519	0.899975	1.30678	0.921552		1.30678	3.16228	0		1.31519	1.0479	1.30678	1.17846		1.30678	5.01072	0.0183487
1.31508	0.874681	1.30664	0.92166		1.30664	3.16228	0		1.31508	1.05231	1.30664	1.18085		1.30664	5.00781	0.0182854
1.31496	0.875389	1.3065	0.921767		1.3065	3.16228	0		1.31497	1.06305	1.3065	1.18324		1.3065	5.00491	0.0182231
1.31485	0.85134	1.30636	0.921874		1.30636	3.16228	0		1.31485	1.04278	1.30636	1.18561		1.30636	5.00203	0.0181606
1.31474	0.882256	1.30623	0.921982		1.30623	3.16228	0		1.31474	1.06827	1.30623	1.18799		1.30623	4.99915	0.0180981
1.31462	0.867821	1.30609	0.922089		1.30609	3.16228	0		1.31462	1.06548	1.30609	1.19035		1.30609	4.99629	0.0180364
1.31451	0.830359	1.30595	0.922196		1.30595	3.16228	0		1.31451	1.07422	1.30595	1.19271		1.30595	4.99344	0.0179756
1.31439	0.868138	1.30581	0.922303		1.30581	3.16228	0		1.31439	1.05779	1.30581	1.19507		1.30581	4.9906	0.0179147
1.31428	0.844571	1.30568	0.922409		1.30568	3.16228	0		1.31428	1.05149	1.30568	1.19741		1.30568	4.98778	0.0178536
1.31416	0.865588	1.30554	0.922516		1.30554	3.16228	0		1.31416	1.06334	1.30554	1.19975		1.30554	4.98496	0.0177935
1.31405	0.847807	1.3054	0.922623		1.3054	3.16228	0		1.31405	1.04505	1.3054	1.20208		1.3054	4.98216	0.0177333
1.31394	0.841319	1.30526	0.922729		1.30526	3.16228	0		1.31394	1.06146	1.30526	1.2044		1.30526	4.97937	0.0176729
1.31382	0.836536	1.30513	0.922836		1.30513	3.16228	0		1.31382	1.07696	1.30513	1.20672		1.30513	4.97659	0.0176145
1.31371	0.846287	1.30499	0.922942		1.30499	3.16228	0		1.31371	1.06644	1.30499	1.20902		1.30499	4.97382	0.0175549
1.31359	0.876456	1.30485	0.923048		1.30485	3.16228	0		1.31359	1.07792	1.30485	1.21132		1.30485	4.97106	0.0174963
1.31348	0.879549	1.30471	0.923154		1.30471	3.16228	0		1.31348	1.06081	1.30471	1.2136		1.30471	4.96831	0.0174375
1.31336	0.874661	1.30458	0.92326		1.30458	3.16228	0		1.31337	1.07575	1.30458	1.21588		1.30458	4.96557	0.0173797
1.31325	0.869664	1.30444	0.923366		1.30444	3.16228	0		1.31325	1.05785	1.30444	1.21815		1.30444	4.96285	0.0173217
1.31314	0.86191	1.3043	0.923472		1.3043	3.16228	0		1.31314	1.0736	1.3043	1.22041		1.3043	4.96013	0.0172647
1.31302	0.859024	1.30416	0.923578		1.30416	3.16228	0		1.31302	1.06054	1.30416	1.22266		1.30416	4.95743	0.0172075
1.31291	0.848677	1.30403	0.923683		1.30403	3.16228	0		1.31291	1.08798	1.30403	1.2249		1.30403	4.95474	0.0171503
1.31279	0.897353	1.30389	0.923789		1.30389	3.16228	0		1.31279	1.07223	1.30389	1.22713		1.30389	4.95206	0.0170939
1.31268	0.861639	1.30375	0.923894		1.30375	3.16228	0		1.31268	1.07715	1.30375	1.22935		1.30375	4.94938	0.0170375
1.31257	0.837673	1.30362	0.923999		1.30362	3.16228	0		1.31257	1.08856	1.30362	1.23156		1.30362	4.94672	0.0169809
1.31245	0.863989	1.30348	0.924105		1.30348	3.16228	0		1.31245	1.07351	1.30348	1.23376		1.30348	4.94407	0.0169253
1.31234	0.868842	1.30334	0.92421		1.30334	3.16228	0		1.31234	1.12781	1.30334	1.23595		1.30334	4.94143	0.0168696
1.31222	0.895654	1.30321	0.924315		1.30321	3.16228	0		1.31222	1.10309	1.30321	1.23813		1.30321	4.9388	0.0168148
1.31211	0.899115	1.30307	0.92442		1.30307	3.16228	0		1.31211	1.094	1.30307	1.24029		1.30307	4.93618	0.0167599
1.312	0.847678	1.30293	0.924524		1.30293	3.16228	0		1.312	1.08005	1.30293	1.24245		1.30293	4.93357	0.0167059
1.31188	0.905443	1.30279	0.924629		1.30279	3.16228	0		1.31188	1.1064	1.30279	1.24459		1.30279	4.93098	0.0166509
1.31177	0.853426	1.30266	0.924734		1.30266	3.16228	0		1.31177	1.08468	1.30266	1.24673		1.30266	4.92839	0.0165977
1.31166	0.901245	1.30252	0.924838		1.30252	3.16228	0		1.31166	1.09678	1.30252	1.24885		1.30252	4.92581	0.0165435
1.31154	0.868715	1.30238	0.924942		1.30238	3.16228	0		1.31154	1.10039	1.30238	1.25096		1.30238	4.92324	0.0164902
1.31143	0.823615	1.30225	0.925047		1.30225	3.16228	0		1.31143	1.09718	1.30225	1.25306		1.30225	4.92068	0.0164368
1.31131	0.848252	1.30211	0.925151		1.30211	3.16228	0		1.31131	1.11861	1.30211	1.25514		1.30211	4.91813	0.0163843
1.3112	0.876004	1.30197	0.925255		1.30197	3.16228	0		1.3112	1.11377	1.30197	1.25722		1.30197	4.91559	0.0163317
1.31109	0.867107	1.30184	0.925359		1.30184	3.16228	0		1.31109	1.08696	1.30184	1.25928		1.30184	4.91306	0.0162791
1.31097	0.890126	1.3017	0.925463		1.3017	3.16228	0		1.31097	1.1436	1.3017	1.26134		1.3017	4.91054	0.0162273
1.31086	0.893964	1.30156	0.925567		1.30156	3.16228	0		1.31086	1.09025	1.30156	1.26338		1.30156	4.90803	0.0161755
1.31075	0.901796	1.30143	0.925671		1.30143	3.16228	0		1.31075	1.10852	1.30143	1.26541		1.30143	4.90553	0.0161236
1.31063	0.889844	1.30129	0.925774		1.30129	3.16228	0		1.31063	1.13646	1.30129	1.26742		1.30129	4.90304	0.0160727
1.31052	0.872111	1.30115	0.925878		1.30115	3.16228	0		1.31052	1.14981	1.30115	1.26943		1.30115	4.90056	0.0160216
1.3104	0.872476	1.30102	0.925981		1.30102	3.16228	0		1.3104	1.14842	1.30102	1.27142		1.30102	4.89809	0.0159705
1.31029	0.898763	1.30088	0.926084		1.30088	3.16228	0		1.31029	1.12624	1.30088	1.2734		1.30088	4.89563	0.0159203
1.31018	0.95524	1.30074	0.926188		1.30074	3.16228	0		1.31018	1.14322	1.30074	1.27537		1.30074	4.89317	0.0158701
1.31006	0.88428	1.30061	0.926291		1.30061	3.16228	0		1.31006	1.12168	1.30061	1.27732		1.30061	4.89073	0.0158197
1.30995	0.881129	1.30047	0.926394		1.30047	3.16228	0		1.30995	1.14782	1.30047	1.27927		1.30047	4.8883	0.0157703
1.30984	0.864891	1.30034	0.926497		1.30034	3.16228	0		1.30984	1.12806	1.30034	1.2812		1.30034	4.88587	0.0157208
1.30972	0.916667	1.3002	0.9266		1.3002	3.16228	0		1.30972	1.14075	1.3002	1.28312		1.3002	4.88345	0.0156713
1.30961	0.910614	1.30006	0.926703		1.30006	3.16228	0		1.30961	1.1458	1.30006	1.28502		1.30006	4.88105	0.0156227
1.3095	0.896458	1.29993	0.926805		1.29993	3.16228	0		1.3095	1.13327	1.29993	1.28692		1.29993	4.87865	0.015574
1.30938	0.87187	1.29979	0.926908		1.29979	3.16228	0		1.30938	1.14863	1.29979	1.2888		1.29979	4.87626	0.0155252
1.30927	0.901535	1.29965	0.92701		1.29965	3.16228	0		1.30927	1.14164	1.29965	1.29067		1.29965	4.87388	0.0154764
1.30916	0.860488	1.29952	0.927113		1.29952	3.16228	0		1.30916	1.1674	1.29952	1.29253		1.29952	4.87151	0.0154285
1.30904	0.83551	1.29938	0.927215		1.29938	3.16228	0		1.30904	1.16222	1.29938	1.29437		1.29938	4.86914	0.0153816
1.30893	0.891068	1.29925	0.927317		1.29925	3.16228	0		1.30893	1.18275	1.29925	1.29621		1.29925	4.86679	0.0153335
1.30882	0.874892	1.29911	0.92742		1.29911	3.16228	0		1.30882	1.20862	1.29911	1.29803		1.29911	4.86444	0.0152864
1.3087	0.862528	1.29897	0.927522		1.29897	3.16228	0		1.3087	1.15613	1.29897	1.29983		1.29897	4.86211	0.0152393
1.30859	0.866314	1.29884	0.927624		1.29884	3.16228	0		1.30859	1.16214	1.29884	1.30163		1.29884	4.85978	0.015192
1.30848	0.915944	1.2987	0.927725		1.2987	3.16228	0		1.30848	1.19278	1.2987	1.30341		1.2987	4.85746	0.0151458
1.30836	0.883787	1.29857	0.927827		1.29857	3.16228	0		1.30836	1.15429	1.29857	1.30518		1.29857	4.85515	0.0150994
1.30825	0.908201	1.29843	0.927929		1.29843	3.16228	0		1.30825	1.1715	1.29843	1.30694		1.29843	4.85285	0.015053
1.30814	0.871797	1.29829	0.928031		1.29829	3.16228	0		1.30814	1.17824	1.29829	1.30868		1.29829	4.85055	0.0150076
1.30802	0.885277	1.29816	0.928132		1.29816	3.16228	0		1.30802	1.16849	1.29816	1.31042		1.29816	4.84827	0.014961
1.30791	0.847332	1.29802	0.928234		1.29802	3.16228	0		1.30791	1.17043	1.29802	1.31214		1.29802	4.84599	0.0149154
1.3078	0.884958	1.29789	0.928335		1.29789	3.16228	0		1.3078	1.18679	1.29789	1.31385		1.29789	4.84372	0.0148708
1.30768	0.864951	1.29775	0.928436		1.29775	3.16228	0		1.30768	1.19238	1.29775	1.31554		1.29775	4.84146	0.0148251
1.30757	0.876124	1.29761	0.928537		1.29761	3.16228	0		1.30757	1.16112	1.29761	1.31723		1.29761	4.83921	0.0147803
1.30746	0.865249	1.29748	0.928638		1.29748	3.16228	0		1.30746	1.18041	1.29748	1.3189		1.29748	4.83696	0.0147365
1.30735	0.84104	1.29734	0.928739		1.29734	3.16228	0		1.30735	1.20922	1.29734	1.32056		1.29734	4.83472	0.0146916
1.30723	0.84637	1.29721	0.92884		1.29721	3.16228	0		1.30723	1.16887	1.29721	1.32221		1.29721	4.8325	0.0146477
1.30712	0.885066	1.29707	0.928941		1.29707	3.16228	0		1.30712	1.19239	1.29707	1.32384		1.29707	4.83028	0.0146037
1.30701	0.905988	1.29694	0.929042		1.29694	3.16228	0		1.30701	1.20167	1.29694	1.32546		1.29694	4.82806	0.0145597
1.30689	0.86693	1.2968	0.929143		1.2968	3.16228	0		1.30689	1.17602	1.2968	1.32707		1.2968	4.82586	0.0145166
1.30678	0.854643	1.29666	0.929243		1.29666	3.16228	0		1.30678	1.22967	1.29666	1.32867		1.29666	4.82366	0.0144724
1.30667	0.881966	1.29653	0.929344		1.29653	3.16228	0		1.30667	1.20001	1.29653	1.33026		1.29653	4.82147	0.0144302
1.30655	0.900357	1.29639	0.929444		1.29639	3.16228	0		1.30655	1.21488	1.29639	1.33183		1.29639	4.81929	0.014387
1.30644	0.888896	1.29626	0.929544		1.29626	3.16228	0		1.30644	1.19632	1.29626	1.33339		1.29626	4.81712	0.0143436
1.30633	0.861286	1.29612	0.929645		1.29612	3.16228	0		1.30633	1.21236	1.29612	1.33494		1.29612	4.81495	0.0143013
1.30622	0.815948	1.29599	0.929745		1.29599	3.16228	0		1.30622	1.20958	1.29599	1.33648		1.29599	4.81279	0.0142589
1.3061	0.849229	1.29585	0.929845		1.29585	3.16228	0		1.3061	1.18764	1.29585	1.33801		1.29585	4.81064	0.0142174
1.30599	0.862217	1.29572	0.929945		1.29572	3.16228	0		1.30599	1.1999	1.29572	1.33952		1.29572	4.8085	0.0141749
1.30588	0.853973	1.29558	0.930045		1.29558	3.16228	0		1.30588	1.20062	1.29558	1.34103		1.29558	4.80637	0.0141333
1.30576	0.903138	1.29545	0.930145		1.29545	3.16228	0		1.30577	1.20608	1.29545	1.34252		1.29545	4.80424	0.0140917
1.30565	0.865845	1.29531	0.930245		1.29531	3.16228	0		1.30565	1.23339	1.29531	1.344		1.29531	4.80212	0.0140511
1.30554	0.909341	1.29517	0.930344		1.29517	3.16228	0		1.30554	1.1949	1.29517	1.34546		1.29517	4.8	0.0140094
1.30543	0.883098	1.29504	0.930444		1.29504	3.16228	0		1.30543	1.23927	1.29504	1.34692		1.29504	4.7979	0.0139686
1.30531	0.893249	1.2949	0.930543		1.2949	3.16228	0		1.30531	1.22537	1.2949	1.34836		1.2949	4.7958	0.0139278
1.3052	0.903051	1.29477	0.930643		1.29477	3.16228	0		1.3052	1.26125	1.29477	1.34979		1.29477	4.79371	0.0138869
1.30509	0.83391	1.29463	0.930742		1.29463	3.16228	0		1.30509	1.25047	1.29463	1.35122		1.29463	4.79163	0.0138471
1.30498	0.866336	1.2945	0.930841		1.2945	3.16228	0		1.30498	1.24492	1.2945	1.35262		1.2945	4.78955	0.0138071
1.30486	0.890526	1.29436	0.930941		1.29436	3.16228	0		1.30486	1.24901	1.29436	1.35402		1.29436	4.78748	0.0137661
1.30475	0.88529	1.29423	0.93104		1.29423	3.16228	0		1.30475	1.24687	1.29423	1.35541		1.29423	4.78542	0.0137271
1.30464	0.912885	1.29409	0.931139		1.29409	3.16228	0		1.30464	1.25912	1.29409	1.35678		1.29409	4.78336	0.013687
1.30453	0.889272	1.29396	0.931238		1.29396	3.16228	0		1.30453	1.26651	1.29396	1.35815		1.29396	4.78132	0.0136479
1.30441	0.854956	1.29382	0.931337		1.29382	3.16228	0		1.30441	1.22193	1.29382	1.3595		1.29382	4.77927	0.0136088
1.3043	0.88504	1.29369	0.931435		1.29369	3.16228	0		1.3043	1.22643	1.29369	1.36084		1.29369	4.77724	0.0135695
1.30419	0.868576	1.29355	0.931534		1.29355	3.16228	0		1.30419	1.26496	1.29355	1.36217		1.29355	4.77521	0.0135303
1.30408	0.887261	1.29342	0.931633		1.29342	3.16228	0		1.30408	1.26895	1.29342	1.36349		1.29342	4.77319	0.013492
1.30396	0.876354	1.29328	0.931731		1.29328	3.16228	0		1.30396	1.22336	1.29328	1.3648		1.29328	4.77118	0.0134537
1.30385	0.897886	1.29315	0.93183		1.29315	3.16228	0		1.30385	1.25089	1.29315	1.3661		1.29315	4.76917	0.0134143
1.30374	0.888613	1.29301	0.931928		1.29301	3.16228	0		1.30374	1.25554	1.29301	1.36738		1.29301	4.76717	0.0133769
1.30363	0.905015	1.29288	0.932027		1.29288	3.16228	0		1.30363	1.24411	1.29288	1.36866		1.29288	4.76518	0.0133384
1.30351	0.894291	1.29274	0.932125		1.29274	3.16228	0		1.30351	1.27516	1.29274	1.36992		1.29274	4.7632	0.0133009
1.3034	0.870015	1.29261	0.932223		1.29261	3.16228	0		1.3034	1.27682	1.29261	1.37117		1.29261	4.76122	0.0132634
1.30329	0.887531	1.29247	0.932321		1.29247	3.16228	0		1.30329	1.25697	1.29247	1.37242		1.29247	4.75924	0.0132258
1.30318	0.860325	1.29234	0.932419		1.29234	3.16228	0		1.30318	1.28222	1.29234	1.37365		1.29234	4.75728	0.0131882
1.30306	0.934333	1.29221	0.932517		1.29221	3.16228	0		1.30307	1.28967	1.29221	1.37487		1.29221	4.75532	0.0131505
1.30295	0.840958	1.29207	0.932615		1.29207	3.16228	0		1.30295	1.27023	1.29207	1.37608		1.29207	4.75337	0.0131139
1.30284	0.921422	1.29194	0.932713		1.29194	3.16228	0		1.30284	1.28182	1.29194	1.37728		1.29194	4.75142	0.0130771
1.30273	0.860128	1.2918	0.93281		1.2918	3.16228	0		1.30273	1.2653	1.2918	1.37847		1.2918	4.74948	0.0130404
1.30262	0.886742	1.29167	0.932908		1.29167	3.16228	0		1.30262	1.30144	1.29167	1.37965		1.29167	4.74755	0.0130036
1.3025	0.896927	1.29153	0.933006		1.29153	3.16228	0		1.3025	1.3018	1.29153	1.38082		1.29153	4.74562	0.0129677
1.30239	0.88597	1.2914	0.933103		1.2914	3.16228	0		1.30239	1.30705	1.2914	1.38198		1.2914	4.7437	0.0129319
1.30228	0.865403	1.29126	0.933201		1.29126	3.16228	0		1.30228	1.25818	1.29126	1.38313		1.29126	4.74179	0.0128949
1.30217	0.895257	1.29113	0.933298		1.29113	3.16228	0		1.30217	1.27597	1.29113	1.38427		1.29113	4.73988	0.01286
1.30206	0.915702	1.29099	0.933395		1.29099	3.16228	0		1.30206	1.29886	1.29099	1.38539		1.29099	4.73798	0.012824
1.30194	0.918009	1.29086	0.933493		1.29086	3.16228	0		1.30194	1.2843	1.29086	1.38651		1.29086	4.73608	0.012788
1.30183	0.863966	1.29073	0.93359		1.29073	3.16228	0		1.30183	1.24971	1.29073	1.38762		1.29073	4.73419	0.012753
1.30172	0.914083	1.29059	0.933687		1.29059	3.16228	0		1.30172	1.29341	1.29059	1.38872		1.29059	4.73231	0.0127179
1.30161	0.95211	1.29046	0.933784		1.29046	3.16228	0		1.30161	1.28817	1.29046	1.38981		1.29046	4.73043	0.0126828
1.3015	0.889508	1.29032	0.933881		1.29032	3.16228	0		1.3015	1.28875	1.29032	1.39089		1.29032	4.72856	0.0126476
1.30138	0.893255	1.29019	0.933977		1.29019	3.16228	0		1.30138	1.28018	1.29019	1.39195		1.29019	4.7267	0.0126135
1.30127	0.849499	1.29005	0.934074		1.29005	3.16228	0		1.30127	1.30513	1.29005	1.39301		1.29005	4.72484	0.0125782
1.30116	0.911877	1.28992	0.934171		1.28992	3.16228	0		1.30116	1.31688	1.28992	1.39406		1.28992	4.72299	0.012544
1.30105	0.884716	1.28979	0.934267		1.28979	3.16228	0		1.30105	1.30772	1.28979	1.3951		1.28979	4.72114	0.0125097
1.30094	0.882578	1.28965	0.934364		1.28965	3.16228	0		1.30094	1.33358	1.28965	1.39613		1.28965	4.7193	0.0124754
1.30082	0.896224	1.28952	0.93446		1.28952	3.16228	0		1.30082	1.3022	1.28952	1.39715		1.28952	4.71747	0.012441
1.30071	0.900897	1.28938	0.934557		1.28938	3.16228	0		1.30071	1.3187	1.28938	1.39816		1.28938	4.71564	0.0124076
1.3006	0.913267	1.28925	0.934653		1.28925	3.16228	0		1.3006	1.29081	1.28925	1.39916		1.28925	4.71382	0.0123743
1.30049	0.890948	1.28912	0.934749		1.28912	3.16228	0		1.30049	1.30548	1.28912	1.40016		1.28912	4.712	0.0123398
1.30038	0.897088	1.28898	0.934845		1.28898	3.16228	0		1.30038	1.3067	1.28898	1.40114		1.28898	4.71019	0.0123074
1.30026	0.848207	1.28885	0.934941		1.28885	3.16228	0		1.30027	1.31561	1.28885	1.40211		1.28885	4.70839	0.0122738
1.30015	0.905524	1.28871	0.935037		1.28871	3.16228	0		1.30015	1.28784	1.28871	1.40308		1.28871	4.70659	0.0122403
1.30004	0.927724	1.28858	0.935133		1.28858	3.16228	0		1.30004	1.34092	1.28858	1.40403		1.28858	4.70479	0.0122078
1.29993	0.943469	1.28845	0.935229		1.28845	3.16228	0		1.29993	1.31674	1.28845	1.40498		1.28845	4.70301	0.0121741
1.29982	0.897319	1.28831	0.935325		1.28831	3.16228	0		1.29982	1.26726	1.28831	1.40591		1.28831	4.70123	0.0121415
1.29971	0.928207	1.28818	0.935421		1.28818	3.16228	0		1.29971	1.30902	1.28818	1.40684		1.28818	4.69945	0.0121089
1.29959	0.859194	1.28804	0.935516		1.28804	3.16228	0		1.2996	1.35877	1.28804	1.40776		1.28804	4.69768	0.0120772
1.29948	0.899082	1.28791	0.935612		1.28791	3.16228	0		1.29948	1.33651	1.28791	1.40867		1.28791	4.69591	0.0120445
1.29937	0.896452	1.28778	0.935707		1.28778	3.16228	0		1.29937	1.32993	1.28778	1.40957		1.28778	4.69416	0.0120128
1.29926	0.891311	1.28764	0.935802		1.28764	3.16228	0		1.29926	1.30346	1.28764	1.41046		1.28764	4.6924	0.01198
1.29915	0.907925	1.28751	0.935897		1.28751	3.16228	0		1.29915	1.31864	1.28751	1.41135		1.28751	4.69065	0.0119482
1.29904	0.86256	1.28738	0.935993		1.28738	3.16228	0		1.29904	1.37373	1.28738	1.41222		1.28738	4.68891	0.0119164
1.29893	0.863439	1.28724	0.936088		1.28724	3.16228	0		1.29893	1.31079	1.28724	1.41309		1.28724	4.68718	0.0118856
1.29881	0.872423	1.28711	0.936183		1.28711	3.16228	0		1.29881	1.3262	1.28711	1.41394		1.28711	4.68544	0.0118537
1.2987	0.915985	1.28697	0.936278		1.28697	3.16228	0		1.2987	1.36835	1.28697	1.41479		1.28697	4.68372	0.0118229
1.29859	0.906594	1.28684	0.936372		1.28684	3.16228	0		1.29859	1.33087	1.28684	1.41563		1.28684	4.682	0.0117909
1.29848	0.89923	1.28671	0.936467		1.28671	3.16228	0		1.29848	1.34188	1.28671	1.41647		1.28671	4.68028	0.01176
1.29837	0.91413	1.28657	0.936562		1.28657	3.16228	0		1.29837	1.31811	1.28657	1.41729		1.28657	4.67857	0.011729
1.29826	0.88618	1.28644	0.936656		1.28644	3.16228	0		1.29826	1.3249	1.28644	1.41811		1.28644	4.67687	0.011698
1.29815	0.914261	1.28631	0.936751		1.28631	3.16228	0		1.29815	1.36173	1.28631	1.41891		1.28631	4.67517	0.011668
1.29803	0.876394	1.28617	0.936845		1.28617	3.16228	0		1.29803	1.33195	1.28617	1.41971		1.28617	4.67347	0.011637
1.29792	0.908385	1.28604	0.93694		1.28604	3.16228	0		1.29792	1.34384	1.28604	1.4205		1.28604	4.67179	0.0116069
1.29781	0.916999	1.28591	0.937034		1.28591	3.16228	0		1.29781	1.33022	1.28591	1.42129		1.28591	4.6701	0.0115768
1.2977	0.889535	1.28577	0.937128		1.28577	3.16228	0		1.2977	1.36555	1.28577	1.42206		1.28577	4.66843	0.0115467
1.29759	0.908939	1.28564	0.937222		1.28564	3.16228	0		1.29759	1.36722	1.28564	1.42283		1.28564	4.66675	0.0115166
1.29748	0.859044	1.28551	0.937316		1.28551	3.16228	0		1.29748	1.40233	1.28551	1.42359		1.28551	4.66508	0.0114864
1.29737	0.876629	1.28537	0.93741		1.28537	3.16228	0		1.29737	1.37194	1.28537	1.42434		1.28537	4.66342	0.0114562
1.29726	0.918868	1.28524	0.937504		1.28524	3.16228	0		1.29726	1.36544	1.28524	1.42508		1.28524	4.66176	0.011427
1.29714	0.915865	1.28511	0.937597		1.28511	3.16228	0		1.29714	1.31591	1.28511	1.42581		1.28511	4.66011	0.0113978
1.29703	0.918281	1.28497	0.937691		1.28497	3.16228	0		1.29703	1.33185	1.28497	1.42654		1.28497	4.65846	0.0113675
1.29692	0.874645	1.28484	0.937784		1.28484	3.16228	0		1.29692	1.3416	1.28484	1.42726		1.28484	4.65682	0.0113382
1.29681	0.8612	1.28471	0.937878		1.28471	3.16228	0		1.29681	1.36209	1.28471	1.42797		1.28471	4.65519	0.0113089
1.2967	0.861902	1.28457	0.937971		1.28457	3.16228	0		1.2967	1.3696	1.28457	1.42868		1.28457	4.65355	0.0112806
1.29659	0.912098	1.28444	0.938064		1.28444	3.16228	0		1.29659	1.35633	1.28444	1.42937		1.28444	4.65193	0.0112513
1.29648	0.897878	1.28431	0.938158		1.28431	3.16228	0		1.29648	1.36662	1.28431	1.43006		1.28431	4.6503	0.0112229
1.29637	0.879212	1.28418	0.938251		1.28418	3.16228	0		1.29637	1.37606	1.28418	1.43074		1.28418	4.64869	0.0111935
1.29626	0.918897	1.28404	0.938344		1.28404	3.16228	0		1.29626	1.38242	1.28404	1.43142		1.28404	4.64707	0.0111651
1.29614	0.915669	1.28391	0.938437		1.28391	3.16228	0		1.29614	1.34903	1.28391	1.43208		1.28391	4.64546	0.0111367
1.29603	0.833617	1.28378	0.938529		1.28378	3.16228	0		1.29603	1.36612	1.28378	1.43274		1.28378	4.64386	0.0111082
1.29592	0.901423	1.28364	0.938622		1.28364	3.16228	0		1.29592	1.36027	1.28364	1.4334		1.28364	4.64226	0.0110797
1.29581	0.882428	1.28351	0.938715		1.28351	3.16228	0		1.29581	1.33883	1.28351	1.43404		1.28351	4.64067	0.0110523
1.2957	0.914433	1.28338	0.938807		1.28338	3.16228	0		1.2957	1.3691	1.28338	1.43468		1.28338	4.63908	0.0110237
1.29559	0.893903	1.28325	0.9389		1.28325	3.16228	0		1.29559	1.38116	1.28325	1.43531		1.28325	4.6375	0.0109962
1.29548	0.950596	1.28311	0.938992		1.28311	3.16228	0		1.29548	1.42921	1.28311	1.43593		1.28311	4.63592	0.0109687
1.29537	0.90124	1.28298	0.939084		1.28298	3.16228	0		1.29537	1.3412	1.28298	1.43655		1.28298	4.63435	0.0109411
1.29526	0.891754	1.28285	0.939177		1.28285	3.16228	0		1.29526	1.39583	1.28285	1.43716		1.28285	4.63278	0.0109135
1.29515	0.912311	1.28271	0.939269		1.28271	3.16228	0		1.29515	1.3976	1.28271	1.43776		1.28271	4.63121	0.0108859
1.29504	0.89756	1.28258	0.939361		1.28258	3.16228	0		1.29504	1.34219	1.28258	1.43835		1.28258	4.62965	0.0108583
1.29492	0.872591	1.28245	0.939453		1.28245	3.16228	0		1.29492	1.34696	1.28245	1.43894		1.28245	4.6281	0.0108317
1.29481	0.820504	1.28232	0.939544		1.28232	3.16228	0		1.29481	1.345	1.28232	1.43952		1.28232	4.62655	0.010804
1.2947	0.855159	1.28218	0.939636		1.28218	3.16228	0		1.2947	1.37432	1.28218	1.4401		1.28218	4.625	0.0107773
1.29459	0.938772	1.28205	0.939728		1.28205	3.16228	0		1.29459	1.3805	1.28205	1.44067		1.28205	4.62346	0.0107506
1.29448	0.875112	1.28192	0.939819		1.28192	3.16228	0		1.29448	1.34594	1.28192	1.44123		1.28192	4.62192	0.0107239
1.29437	0.865636	1.28179	0.939911		1.28179	3.16228	0		1.29437	1.36751	1.28179	1.44178		1.28179	4.62039	0.0106972
1.29426	0.898403	1.28165	0.940002		1.28165	3.16228	0		1.29426	1.35522	1.28165	1.44233		1.28165	4.61886	0.0106704
1.29415	0.882145	1.28152	0.940093		1.28152	3.16228	0		1.29415	1.34941	1.28152	1.44287		1.28152	4.61734	0.0106436
1.29404	0.944744	1.28139	0.940185		1.28139	3.16228	0		1.29404	1.37592	1.28139	1.44341		1.28139	4.61582	0.0106168
1.29393	0.874815	1.28126	0.940276		1.28126	3.16228	0		1.29393	1.37205	1.28126	1.44393		1.28126	4.6143	0.010591
1.29382	0.908149	1.28112	0.940367		1.28112	3.16228	0		1.29382	1.40466	1.28112	1.44446		1.28112	4.61279	0.0105652
1.29371	0.863403	1.28099	0.940457		1.28099	3.16228	0		1.29371	1.42159	1.28099	1.44497		1.28099	4.61129	0.0105383
1.2936	0.921379	1.28086	0.940548		1.28086	3.16228	0		1.2936	1.37175	1.28086	1.44548		1.28086	4.60979	0.0105124
1.29349	0.855712	1.28073	0.940639		1.28073	3.16228	0		1.29349	1.39906	1.28073	1.44598		1.28073	4.60829	0.0104865
1.29338	0.938985	1.28059	0.94073		1.28059	3.16228	0		1.29338	1.3765	1.28059	1.44648		1.28059	4.6068	0.0104617
1.29327	0.923626	1.28046	0.94082		1.28046	3.16228	0		1.29327	1.36306	1.28046	1.44697		1.28046	4.60531	0.0104358
1.29315	0.881804	1.28033	0.94091		1.28033	3.16228	0		1.29315	1.39141	1.28033	1.44745		1.28033	4.60383	0.0104098
1.29304	0.899021	1.2802	0.941001		1.2802	3.16228	0		1.29304	1.34509	1.2802	1.44793		1.2802	4.60235	0.0103849
1.29293	0.874529	1.28007	0.941091		1.28007	3.16228	0		1.29293	1.37733	1.28007	1.4484		1.28007	4.60087	0.0103589
1.29282	0.886371	1.27993	0.941181		1.27993	3.16228	0		1.29282	1.38093	1.27993	1.44887		1.27993	4.5994	0.010334
1.29271	0.851303	1.2798	0.941271		1.2798	3.16228	0		1.29271	1.38988	1.2798	1.44933		1.2798	4.59793	0.010309
1.2926	0.912524	1.27967	0.941361		1.27967	3.16228	0		1.2926	1.39817	1.27967	1.44978		1.27967	4.59647	0.010284
1.29249	0.930726	1.27954	0.941451		1.27954	3.16228	0		1.29249	1.34808	1.27954	1.45023		1.27954	4.59501	0.010259
1.29238	0.890043	1.27941	0.941541		1.27941	3.16228	0		1.29238	1.35215	1.27941	1.45067		1.27941	4.59356	0.0102339
1.29227	0.947508	1.27927	0.94163		1.27927	3.16228	0		1.29227	1.40725	1.27927	1.4511		1.27927	4.59211	0.0102088
1.29216	0.896974	1.27914	0.94172		1.27914	3.16228	0		1.29216	1.38501	1.27914	1.45153		1.27914	4.59066	0.0101848
1.29205	0.87279	1.27901	0.941809		1.27901	3.16228	0		1.29205	1.41178	1.27901	1.45196		1.27901	4.58922	0.0101597
1.29194	0.892497	1.27888	0.941899		1.27888	3.16228	0		1.29194	1.40918	1.27888	1.45237		1.27888	4.58778	0.0101356
1.29183	0.927382	1.27875	0.941988		1.27875	3.16228	0		1.29183	1.42741	1.27875	1.45279		1.27875	4.58635	0.0101115
1.29172	0.889192	1.27861	0.942077		1.27861	3.16228	0		1.29172	1.40577	1.27861	1.45319		1.27861	4.58492	0.0100874
1.29161	0.897688	1.27848	0.942166		1.27848	3.16228	0		1.29161	1.39695	1.27848	1.45359		1.27848	4.58349	0.0100622
1.2915	0.936644	1.27835	0.942255		1.27835	3.16228	0		1.2915	1.39488	1.27835	1.45399		1.27835	4.58207	0.0100391
1.29139	0.872784	1.27822	0.942344		1.27822	3.16228	0		1.29139	1.41508	1.27822	1.45438		1.27822	4.58066	0.0100149
1.29128	0.889229	1.27809	0.942433		1.27809	3.16228	0		1.29128	1.42311	1.27809	1.45476		1.27809	4.57924	0.00999073
1.29117	0.927574	1.27796	0.942521		1.27796	3.16228	0		1.29117	1.43339	1.27796	1.45514		1.27796	4.57783	0.0099665
1.29106	0.921106	1.27782	0.94261		1.27782	3.16228	0		1.29106	1.43153	1.27782	1.45551		1.27782	4.57643	0.00994334
1.29095	0.887637	1.27769	0.942698		1.27769	3.16228	0		1.29095	1.41349	1.27769	1.45588		1.27769	4.57503	0.00991907
1.29084	0.889544	1.27756	0.942787		1.27756	3.16228	0		1.29084	1.39148	1.27756	1.45624		1.27756	4.57363	0.00989586
1.29073	0.945544	1.27743	0.942875		1.27743	3.16228	0		1.29073	1.37914	1.27743	1.4566		1.27743	4.57224	0.00987263
1.29062	0.931517	1.2773	0.942963		1.2773	3.16228	0		1.29062	1.37707	1.2773	1.45695		1.2773	4.57085	0.00984938
1.29051	0.897183	1.27717	0.943051		1.27717	3.16228	0		1.29051	1.40613	1.27717	1.4573		1.27717	4.56946	0.0098261
1.2904	0.912313	1.27703	0.943139		1.27703	3.16228	0		1.2904	1.39794	1.27703	1.45764		1.27703	4.56808	0.00980281
1.29029	0.929754	1.2769	0.943227		1.2769	3.16228	0		1.29029	1.40497	1.2769	1.45797		1.2769	4.5667	0.00977949
1.29018	0.913784	1.27677	0.943315		1.27677	3.16228	0		1.29018	1.45048	1.27677	1.4583		1.27677	4.56533	0.00975615
1.29007	0.875136	1.27664	0.943403		1.27664	3.16228	0		1.29007	1.39301	1.27664	1.45863		1.27664	4.56396	0.00973388
1.28996	0.933717	1.27651	0.94349		1.27651	3.16228	0		1.28996	1.4125	1.27651	1.45895		1.27651	4.56259	0.00971049
1.28985	0.913581	1.27638	0.943578		1.27638	3.16228	0		1.28985	1.40954	1.27638	1.45926		1.27638	4.56123	0.00968818
1.28974	0.964699	1.27625	0.943665		1.27625	3.16228	0		1.28974	1.43269	1.27625	1.45957		1.27625	4.55987	0.00966585
1.28963	0.906992	1.27611	0.943753		1.27611	3.16228	0		1.28963	1.36761	1.27611	1.45988		1.27611	4.55851	0.0096424
1.28952	0.925699	1.27598	0.94384		1.27598	3.16228	0		1.28952	1.42888	1.27598	1.46017		1.27598	4.55716	0.00962002
1.28941	0.917082	1.27585	0.943927		1.27585	3.16228	0		1.28941	1.39837	1.27585	1.46047		1.27585	4.55582	0.00959762
1.2893	0.86813	1.27572	0.944014		1.27572	3.16228	0		1.2893	1.42788	1.27572	1.46076		1.27572	4.55447	0.00957521
1.28919	0.882841	1.27559	0.944101		1.27559	3.16228	0		1.28919	1.39357	1.27559	1.46104		1.27559	4.55313	0.00955276
1.28908	0.901045	1.27546	0.944188		1.27546	3.16228	0		1.28908	1.41203	1.27546	1.46132		1.27546	4.5518	0.0095314
1.28897	0.923342	1.27533	0.944275		1.27533	3.16228	0		1.28897	1.42087	1.27533	1.4616		1.27533	4.55046	0.00950892
1.28886	0.85615	1.2752	0.944361		1.2752	3.16228	0		1.28886	1.40313	1.2752	1.46187		1.2752	4.54913	0.00948642
1.28875	0.927636	1.27506	0.944448		1.27506	3.16228	0		1.28875	1.41869	1.27506	1.46214		1.27506	4.54781	0.009465
1.28864	0.918385	1.27493	0.944534		1.27493	3.16228	0		1.28864	1.41777	1.27493	1.4624		1.27493	4.54649	0.00944356
1.28853	0.92282	1.2748	0.944621		1.2748	3.16228	0		1.28853	1.39535	1.2748	1.46265		1.2748	4.54517	0.00942099
1.28842	0.87159	1.27467	0.944707		1.27467	3.16228	0		1.28842	1.43877	1.27467	1.4629		1.27467	4.54385	0.00939951
1.28831	0.916464	1.27454	0.944793		1.27454	3.16228	0		1.28831	1.38883	1.27454	1.46315		1.27454	4.54254	0.00937801
1.2882	0.961536	1.27441	0.94488		1.27441	3.16228	0		1.2882	1.40859	1.27441	1.46339		1.27441	4.54123	0.00935649
1.28809	0.898722	1.27428	0.944966		1.27428	3.16228	0		1.28809	1.42199	1.27428	1.46363		1.27428	4.53993	0.00933495
1.28799	0.892949	1.27415	0.945052		1.27415	3.16228	0		1.28799	1.41378	1.27415	1.46386		1.27415	4.53863	0.00931338
1.28788	0.938348	1.27402	0.945137		1.27402	3.16228	0		1.28788	1.43876	1.27402	1.46409		1.27402	4.53733	0.0092929
1.28777	0.958562	1.27389	0.945223		1.27389	3.16228	0		1.28777	1.38817	1.27389	1.46432		1.27389	4.53604	0.0092713
1.28766	0.893705	1.27375	0.945309		1.27375	3.16228	0		1.28766	1.41398	1.27375	1.46454		1.27375	4.53475	0.00925079
1.28755	0.917789	1.27362	0.945395		1.27362	3.16228	0		1.28755	1.42718	1.27362	1.46475		1.27362	4.53346	0.00922915
1.28744	0.92006	1.27349	0.94548		1.27349	3.16228	0		1.28744	1.40703	1.27349	1.46496		1.27349	4.53218	0.00920859
1.28733	0.966868	1.27336	0.945565		1.27336	3.16228	0		1.28733	1.44211	1.27336	1.46517		1.27336	4.5309	0.00918691
1.28722	0.9355	1.27323	0.945651		1.27323	3.16228	0		1.28722	1.4303	1.27323	1.46537		1.27323	4.52963	0.00916632
1.28711	0.873995	1.2731	0.945736		1.2731	3.16228	0		1.28711	1.39806	1.2731	1.46557		1.2731	4.52835	0.00914571
1.287	0.914568	1.27297	0.945821		1.27297	3.16228	0		1.287	1.40899	1.27297	1.46577		1.27297	4.52708	0.00912508
1.28689	0.867729	1.27284	0.945906		1.27284	3.16228	0		1.28689	1.44085	1.27284	1.46596		1.27284	4.52582	0.00910443
1.28678	0.917546	1.27271	0.945991		1.27271	3.16228	0		1.28678	1.40454	1.27271	1.46614		1.27271	4.52455	0.00908377
1.28667	0.886138	1.27258	0.946076		1.27258	3.16228	0		1.28667	1.42151	1.27258	1.46632		1.27258	4.5233	0.00906308
1.28656	0.945154	1.27245	0.946161		1.27245	3.16228	0		1.28656	1.44544	1.27245	1.4665		1.27245	4.52204	0.00904349
1.28645	0.969432	1.27232	0.946246		1.27232	3.16228	0		1.28645	1.38492	1.27232	1.46668		1.27232	4.52079	0.00902276
1.28634	0.858978	1.27219	0.946331		1.27219	3.16228	0		1.28634	1.42095	1.27219	1.46684		1.27219	4.51954	0.00900313
1.28624	0.871728	1.27206	0.946415		1.27206	3.16228	0		1.28624	1.44023	1.27206	1.46701		1.27206	4.51829	0.00898237
1.28613	0.891632	1.27193	0.9465		1.27193	3.16228	0		1.28613	1.41928	1.27193	1.46717		1.27193	4.51705	0.00896271
1.28602	0.89568	1.27179	0.946584		1.27179	3.16228	0		1.28602	1.43143	1.27179	1.46733		1.27179	4.51581	0.00894192
1.28591	0.919232	1.27166	0.946668		1.27166	3.16228	0		1.28591	1.37878	1.27166	1.46748		1.27166	4.51458	0.00892221
1.2858	0.857519	1.27153	0.946753		1.27153	3.16228	0		1.2858	1.4468	1.27153	1.46763		1.27153	4.51334	0.00890249
1.28569	0.916122	1.2714	0.946837		1.2714	3.16228	0		1.28569	1.40497	1.2714	1.46778		1.2714	4.51211	0.00888276
1.28558	0.995992	1.27127	0.946921		1.27127	3.16228	0		1.28558	1.38178	1.27127	1.46792		1.27127	4.51089	0.008863
1.28547	0.895782	1.27114	0.947005		1.27114	3.16228	0		1.28547	1.41543	1.27114	1.46806		1.27114	4.50966	0.00884323
1.28536	0.823945	1.27101	0.947089		1.27101	3.16228	0		1.28536	1.38946	1.27101	1.46819		1.27101	4.50844	0.00882344
1.28525	0.8844	1.27088	0.947173		1.27088	3.16228	0		1.28525	1.39824	1.27088	1.46832		1.27088	4.50723	0.00880475
1.28514	0.897241	1.27075	0.947256		1.27075	3.16228	0		1.28514	1.40575	1.27075	1.46845		1.27075	4.50601	0.00878493
1.28504	0.88148	1.27062	0.94734		1.27062	3.16228	0		1.28504	1.41656	1.27062	1.46857		1.27062	4.5048	0.00876509
1.28493	0.861456	1.27049	0.947424		1.27049	3.16228	0		1.28493	1.43712	1.27049	1.46869		1.27049	4.5036	0.00874634
1.28482	0.91998	1.27036	0.947507		1.27036	3.16228	0		1.28482	1.424	1.27036	1.46881		1.27036	4.50239	0.00872647
1.28471	0.9371	1.27023	0.94759		1.27023	3.16228	0		1.28471	1.42643	1.27023	1.46892		1.27023	4.50119	0.00870769
1.2846	0.905667	1.2701	0.947674		1.2701	3.16228	0		1.2846	1.45165	1.2701	1.46903		1.2701	4.49999	0.0086889
1.28449	0.920426	1.26997	0.947757		1.26997	3.16228	0		1.28449	1.43908	1.26997	1.46913		1.26997	4.4988	0.00867009
1.28438	0.955304								1.28438	1.42182
1.28427	0.94357								1.28427	1.42246
1.28416	0.949332								1.28416	1.40961
1.28406	0.96247								1.28406	1.40172
1.28395	0.888147								1.28395	1.39602
1.28384	0.930203								1.28384	1.37885
1.28373	0.889753								1.28373	1.45518
1.28362	0.902832								1.28362	1.46362
1.28351	0.90125								1.28351	1.4461
1.2834	0.877544								1.2834	1.42189
1.28329	0.906238								1.28329	1.41052
1.28319	0.942137								1.28319	1.42661
1.28308	0.909683								1.28308	1.42178
1.28297	0.895962								1.28297	1.47395
1.28286	0.955745								1.28286	1.45708
1.28275	0.911406								1.28275	1.44414
1.28264	0.9678								1.28264	1.43347
1.28253	0.932186								1.28253	1.46242
1.28242	0.963211								1.28243	1.45858
1.28232	0.906721								1.28232	1.41976
1.28221	0.925007								1.28221	1.46125
1.2821	0.872301								1.2821	1.43241
1.28199	0.885224								1.28199	1.43821
1.28188	0.888563								1.28188	1.40261
1.28177	0.906077								1.28177	1.42589
1.28167	0.912252								1.28167	1.41247
1.28156	0.959071								1.28156	1.46172
1.28145	0.871662								1.28145	1.44853
1.28134	0.924482								1.28134	1.41812
1.28123	0.930584								1.28123	1.42023
1.28112	0.94397								1.28112	1.44279
1.28102	0.939561								1.28102	1.44675
1.28091	0.933461								1.28091	1.42493
1.2808	0.910956								1.2808	1.45065
1.28069	0.911851								1.28069	1.44953
1.28058	0.929431								1.28058	1.441
1.28047	0.972663								1.28047	1.41615
1.28037	0.957395								1.28037	1.44712
1.28026	0.891781								1.28026	1.42428
1.28015	0.919169								1.28015	1.44543
1.28004	0.902545								1.28004	1.45563
1.27993	0.909463								1.27993	1.46397
1.27983	0.913223								1.27983	1.45949
1.27972	0.914068								1.27972	1.3835
1.27961	0.990052								1.27961	1.44068
1.2795	0.942397								1.2795	1.44017
1.27939	0.936252								1.27939	1.43216
1.27929	0.928827								1.27929	1.40541
1.27918	0.991194								1.27918	1.43867
1.27907	0.922069								1.27907	1.4528
1.27896	0.952685								1.27896	1.4336
1.27885	0.896559								1.27885	1.49089
1.27875	0.927168								1.27875	1.48254
1.27864	0.914506								1.27864	1.42164
1.27853	0.937412								1.27853	1.45005
1.27842	0.90737								1.27842	1.39729
1.27831	0.910223								1.27832	1.39448
1.27821	0.924028								1.27821	1.39784
1.2781	0.910525								1.2781	1.42252
1.27799	0.930702								1.27799	1.44239
1.27788	0.896665								1.27788	1.40124
1.27778	0.914334								1.27778	1.41142
1.27767	0.848755								1.27767	1.44424
1.27756	0.900592								1.27756	1.39005
1.27745	0.936425								1.27745	1.44638
1.27735	0.949641								1.27735	1.37587
1.27724	0.949685								1.27724	1.44839
1.27713	0.931993								1.27713	1.4048
1.27702	0.918685								1.27702	1.44828
1.27692	0.933852								1.27692	1.4192
1.27681	0.943311								1.27681	1.42334
1.2767	0.895651								1.2767	1.4424
1.27659	0.957641								1.27659	1.41593
1.27649	0.955703								1.27649	1.41734
1.27638	0.912171								1.27638	1.42051
1.27627	0.904151								1.27627	1.41402
1.27616	0.982031								1.27616	1.41052
1.27606	0.936839								1.27606	1.44697
1.27595	0.899592								1.27595	1.42837
1.27584	0.992487								1.27584	1.40127
1.27573	1.02634								1.27573	1.39103
1.27563	0.947244								1.27563	1.45626
1.27552	0.900343								1.27552	1.47903
1.27541	0.920404								1.27541	1.43656
1.2753	0.909155								1.2753	1.43518
1.2752	0.931198								1.2752	1.41412
1.27509	0.885661								1.27509	1.44532
1.27498	0.945882								1.27498	1.41883
1.27488	0.92937								1.27488	1.47368
1.27477	0.960696								1.27477	1.41286
1.27466	0.893551								1.27466	1.41489
1.27455	0.935083								1.27455	1.45205
1.27445	0.994791								1.27445	1.43853
1.27434	0.977826								1.27434	1.41302
1.27423	0.881922								1.27423	1.42313
1.27413	0.973809								1.27413	1.44177
1.27402	0.919353								1.27402	1.38191
1.27391	0.957634								1.27391	1.45707
1.2738	0.923868								1.2738	1.43426
1.2737	0.898446								1.2737	1.43014
1.27359	0.91017								1.27359	1.44199
1.27348	0.915748								1.27348	1.4744
1.27338	0.949808								1.27338	1.41965
1.27327	0.923154								1.27327	1.43227
1.27316	0.91897								1.27316	1.41228
1.27306	0.963213								1.27306	1.44573
1.27295	0.922136								1.27295	1.4202
1.27284	0.924765								1.27284	1.47201
1.27274	0.920181								1.27274	1.45103
1.27263	0.911451								1.27263	1.44357
1.27252	0.920735								1.27252	1.4311
1.27242	0.917381								1.27242	1.41351
1.27231	0.933321								1.27231	1.44291
1.2722	0.911187								1.2722	1.4205
1.2721	0.952625								1.2721	1.397
1.27199	0.941544								1.27199	1.43857
1.27188	0.930384								1.27188	1.39765
1.27178	1.00552								1.27178	1.41577
1.27167	0.920526								1.27167	1.39749
1.27156	0.98155								1.27156	1.39132
1.27146	0.975735								1.27146	1.41404
1.27135	0.97574								1.27135	1.43208
1.27124	0.958157								1.27124	1.45049
1.27114	0.910542								1.27114	1.44799
1.27103	0.884092								1.27103	1.40687
1.27092	0.96146								1.27092	1.40434
1.27082	0.979314								1.27082	1.39057
1.27071	0.839111								1.27071	1.39257
1.2706	0.885873								1.2706	1.41867
1.2705	0.906142								1.2705	1.45981
1.27039	0.869154								1.27039	1.44219
1.27028	0.974621								1.27028	1.44605
1.27018	0.975361								1.27018	1.38245
1.27007	0.9082								1.27007	1.43156
1.26997	1.01234								1.26997	1.42641
