# Supplementary material for: Magnetically-dressed CrSBr exciton-polaritons in ultrastrong coupling regime
Source: Research Square preprint supplement (doi:10.21203/rs.3.rs-3164083/v1), 2023-07-26
Supplement: Supplementary file 5 [file Figure2.xlsx]

## Sheet: a
Position (μm)	Height (nm)
0	189.366
0.0194725	189.302
0.0389449	189.311
0.0584174	189.279
0.0778899	189.335
0.0973623	189.469
0.116835	189.599
0.136307	189.577
0.15578	189.539
0.175252	189.636
0.194725	189.65
0.214197	189.651
0.23367	189.806
0.253142	189.913
0.272615	190.099
0.292087	190.134
0.31156	190.329
0.331032	190.457
0.350504	190.465
0.369977	190.477
0.389449	190.65
0.408922	190.723
0.428394	190.754
0.447867	190.872
0.467339	190.825
0.486812	190.959
0.506284	191.214
0.525757	191.382
0.545229	191.333
0.564702	191.377
0.584174	191.495
0.603647	191.578
0.623119	191.643
0.642591	191.717
0.662064	191.874
0.681536	191.957
0.701009	192.215
0.720481	192.404
0.739954	192.389
0.759426	192.402
0.778899	192.674
0.798371	192.767
0.817843	192.867
0.837316	192.917
0.856788	193.08
0.876261	193.225
0.895733	193.337
0.915206	193.491
0.934678	193.656
0.954151	193.605
0.973623	193.855
0.993096	194.169
1.01257	194.415
1.03204	194.615
1.05151	194.848
1.07099	194.963
1.09046	195.227
1.10993	195.571
1.1294	195.83
1.14888	195.835
1.16835	196.162
1.18782	196.522
1.20729	197.148
1.22677	197.599
1.24624	198.105
1.26571	199.078
1.28518	199.888
1.30466	196.523
1.32413	184.558
1.3436	174.977
1.36307	154.915
1.38255	117.942
1.40202	51.0495
1.42149	35.4551
1.44096	23.2738
1.46044	18.0621
1.47991	18.3928
1.49938	18.428
1.51885	19.0274
1.53833	19.4867
1.5578	17.0841
1.57727	6.60459
1.59674	-11.7043
1.61622	-34.1497
1.63569	-57.6568
1.65516	-86.9686
1.67463	-128.95
1.69411	-188.727
1.71358	-250.241
1.73305	-266.49
1.75252	-266.406
1.772	-266.573
1.79147	-266.978
1.81094	-266.489
1.83041	-266.553
1.84989	-265.811
1.86936	-265.611
1.88883	-265.504
1.9083	-265.52
1.92778	-265.966
1.94725	-266.304
1.96672	-265.827
1.98619	-266.075
2.00567	-266.731
2.02514	-266.613
2.04461	-266.976
2.06408	-266.925
2.08356	-267.305
2.10303	-267.708
2.1225	-267.79
2.14197	-267.538
2.16145	-267.798
2.18092	-267.379
2.20039	-267.593
2.21986	-268.237
2.23934	-268.349
2.25881	-268.233
2.27828	-268.312
2.29775	-268.222
2.31723	-268.477
2.3367	-268.835
2.35617	-269.185
2.37564	-269.166
2.39512	-269.549
2.41459	-269.163
2.43406	-269.697
2.45353	-269.672
2.47301	-269.917
2.49248	-270.06
2.51195	-270
2.53142	-270.186
2.5509	-270.271
2.57037	-271.024
2.58984	-271.155
2.60931	-270.906
2.62879	-271.254
2.64826	-272.009
2.66773	-271.973
2.6872	-271.655
2.70668	-271.94
2.72615	-272.912
2.74562	-272.437
2.76509	-272.325

## Sheet: b
sinθ	Energy (eV)	△R/R0
-0.65	1.37623	1.01564	1.01101	1.00354	1.00086	0.998633	0.999258	1.01346	0.995829	0.997714	0.999072	1.00609	1.00403	1.00675	1.0023	1.00403	1.00464	0.999421	1.00838	1.00475	0.998743	1.01183	1.02543	1.00192	0.989252	0.968314	0.976929	0.982691	0.983905	0.998507	0.99406	0.992403	0.994315	1.00019	1.01139	1.00089	1.00652	0.999164	0.98949	1.00297	0.992734	0.992398	1.0177	1.00586	1.00224	0.986575	1.00873	1.00826	1.00163
-0.622917	1.37611	1.01015	1.01301	1.00532	1.00122	0.996024	0.996169	0.999822	1.00128	1.00339	1.00577	1.00607	1.00836	1.01345	1.0041	0.998877	0.995024	1.00734	1.01094	1.01537	1.00709	1.01375	1.01994	1.00183	0.992857	0.976013	0.992808	0.989995	0.991451	0.997168	0.996269	1.00076	1.0053	1.00129	1.00374	0.996691	1.00393	0.993868	0.993901	1.00145	0.996827	0.995914	1.00885	1.00896	0.998857	0.992821	0.997256	1.00939	1
-0.595833	1.37599	1.0122	1.01155	0.991821	0.987465	0.99619	0.992975	1.00337	0.989759	0.994431	1.00153	1.00843	0.999822	1.00704	1.0078	1.00929	1.00119	1.00593	1.00848	1.00187	0.998427	1.01762	1.01714	0.999639	0.977675	0.97768	0.978812	0.98905	0.995073	0.994841	0.987678	0.993616	1.00336	1.00421	0.997561	1.00613	1.00227	0.992166	0.985754	0.993954	0.988599	1.01056	0.997869	1.00566	0.991061	0.990431	1.00051	1.00489	1.00826
-0.56875	1.37587	1.00902	1.01579	0.99941	0.991878	0.99391	0.997603	0.999139	1.00199	1.00456	1.00866	1.01703	1.01028	1.00444	1.00793	1.00925	0.997531	0.993009	1.00859	1.01589	0.998516	1.01551	1.02657	1.00349	1.00039	0.992607	0.992558	0.984703	0.993728	0.998217	0.994912	0.990539	0.997762	0.994949	1.00041	0.998929	1.01731	0.997859	0.991213	0.985114	0.986507	1.00316	1.01217	1.01732	1.01077	0.983452	1.00888	1.01177	1.00512
-0.541667	1.37575	1.01054	1.00561	1.00119	0.998782	0.996549	0.99931	1.00173	0.994245	0.990807	1.00153	1.00758	1.00228	1.0092	1.01557	0.997917	0.998895	1.00263	1.01341	1.00063	1.00367	1.01575	1.02371	0.996649	0.977357	0.98572	0.979545	0.981248	0.990768	0.994503	0.998827	0.986653	0.996904	1.00346	1.00518	0.9875	0.995925	0.998435	0.991594	0.986772	0.996078	0.995316	1.00707	1.01665	1.00568	0.976996	1.00599	1.0114	1.01006
-0.514583	1.37563	1.014	1.01331	0.989	0.999179	0.994659	0.999826	1.00641	0.999641	1.0015	1.00816	1.00118	1.0014	1.01161	1.00642	0.990794	1	1.00034	0.999492	1.00864	0.997021	1.0198	1.01721	0.997397	0.982387	0.970993	0.976933	0.991801	0.987647	0.992193	0.998459	0.998431	1.0018	1.0049	1.00292	1.00708	1.00308	1.00762	1.00083	0.989922	1.00435	1.00337	1.01942	1.01173	1.00217	0.982474	1.00462	1.00771	1.00918
-0.4875	1.37551	1.00685	1.00824	0.978607	0.998352	0.993275	0.992537	1.00192	0.995477	0.994231	1.00868	1.00682	1.00348	1.00548	1.01101	0.995355	0.99598	1.00233	1.00316	1.00136	1.00437	1.01032	1.03122	1.01136	0.97769	0.989151	0.98931	0.983229	0.996969	1.00114	0.999431	0.987053	0.994393	0.999326	0.992068	1.00677	0.99838	0.990306	0.995527	0.991099	0.99744	0.999256	1.00631	1.01062	1.00762	0.998295	0.99704	1.00831	1.00536
-0.460417	1.37539	1.01309	1.008	0.996738	0.999792	0.995509	0.999464	1.00603	0.99467	0.994366	1.00398	1.00205	1.02285	1.01015	1.00784	0.986265	1.00159	1.00148	1.00995	1.0112	1.00992	1.01578	1.02685	1.00633	0.995646	0.989094	0.983649	0.980974	0.989788	0.995112	0.994519	0.989038	0.992442	1.00408	0.99961	0.994471	1.00297	0.999243	0.998384	1.00254	0.998297	0.999443	1.00795	1.01527	0.998231	0.990055	0.995147	1.00842	1.01449
-0.433333	1.37528	0.996054	1.01436	0.998965	0.995148	1.0021	1.00489	1.00394	1.0013	0.996897	1.01311	1.00962	1.01148	1.00561	1.00815	1.00907	0.995771	1.00232	1.00495	1.00311	0.998565	1.0199	1.01902	1.00632	0.99278	0.987247	0.983344	0.985036	0.990503	0.992848	1.00364	0.992879	0.999819	1.00544	1.00352	1.00266	1.00837	1.01454	1.00053	0.993864	0.991121	1.00369	1.00861	1.01652	1.00676	0.997685	1.00473	1.01255	1.00545
-0.40625	1.37516	1.01424	1.00702	0.998528	0.996132	1.00505	0.992674	1.00271	0.998104	1	1.0025	1.00299	1.00292	1.00472	1.00128	1.00147	0.998731	1.00594	1.01344	1.01138	1.00397	1.01136	1.03367	1.01842	0.997773	0.985154	0.979058	0.988397	0.991521	1.00503	1.00039	0.994289	0.995606	1.00979	1.00098	1.00228	1.01415	0.988722	0.991612	0.996072	0.991612	1.00731	1.02022	1.01978	1.00992	0.984608	0.992507	1.01023	1.01066
-0.379167	1.37504	1.00855	1.00725	0.989653	0.998949	0.997885	1.00036	1.00286	0.996445	1.00035	1.00336	1.01098	1.00937	1.00257	1.00961	0.997072	0.990372	0.998124	1.00637	1.00241	0.996467	1.01328	1.0186	1.00682	0.983913	0.977896	0.990777	0.980797	1.00038	0.998853	0.985379	0.99677	0.994198	1.00209	0.999406	1.00208	1.00023	0.992008	0.993954	1	0.990293	1	1.01146	1.0132	1.01457	0.994883	1.00132	1.0147	0.999754
-0.352083	1.37492	1.00942	1.01154	1.00145	1.00566	0.99337	1.0011	0.996383	0.996993	1.00139	0.996404	0.99735	1.01318	1.00758	1.00281	0.998938	0.994829	1.00487	1.01015	1.00678	0.998275	1.02389	1.0212	1.00414	0.973773	0.99339	0.984869	0.98853	0.997459	1.00328	0.989339	0.995472	0.998685	1.00229	1.00142	1.00021	1.00447	0.997973	0.992366	1.00196	0.99167	0.996099	1.0088	1.01706	1.01283	0.991055	1.00307	1.00622	1.0046
-0.325	1.3748	1.00716	1.01111	0.991655	0.981738	0.998866	0.989113	1.00232	0.994236	0.99862	1.01087	1.00457	0.99816	1.00995	1.00236	0.996836	1.00607	1.00293	1.00594	1.00424	0.992599	1.01052	1.01894	0.992784	0.991701	0.989177	0.992667	0.98418	0.989551	0.997677	0.989717	0.994202	0.996414	1.01229	0.994929	0.995296	1.00963	1.00127	1	0.991799	0.991131	1.00583	1.01363	1.01304	1.0051	0.991149	1.00321	1.01969	1.01466
-0.297917	1.37468	1.00219	1.01443	0.995466	0.990982	0.993109	0.99541	0.999819	0.994951	0.997046	1.00625	1.00458	1.01062	1.00783	1.01965	1.00234	0.994461	1.00383	1.0028	1.00843	0.998306	1.01488	1.01857	1.00916	0.990868	0.992974	0.981157	0.976992	0.983031	0.99803	0.999604	1	0.995073	1.00534	1.00203	1.01028	0.994478	0.988648	0.99894	0.991009	0.994956	0.997711	1.01189	1.02543	0.997696	0.994488	1.00083	1.00466	1.01602
-0.270833	1.37456	1.00789	1.0054	0.991873	0.997482	1.00172	1.00019	0.991382	0.996546	0.99964	0.999107	1.00175	1.01113	1.0087	1.00393	1.00216	0.996113	1.00622	1.00943	1.01984	0.996573	1.01085	1.00722	1.00629	0.978796	0.982886	0.994309	0.983213	0.995339	0.993553	0.993869	1	0.99281	0.997338	1.00224	1.00281	1.00854	1.00052	0.990336	0.997536	0.995133	0.995429	1.0114	1.01465	1.00232	0.995097	0.998958	1.01393	1.01334
-0.24375	1.37444	1.01425	1.01231	0.994217	0.99333	0.989903	1.00295	1.00056	1.01052	0.999253	1.00596	1.0065	1.00201	1.00219	1.0153	0.998732	1.00203	0.998786	1.00646	1.01327	0.992362	1.01529	1.00779	0.994417	0.981982	0.98186	0.98238	0.984597	0.995087	1.00059	0.985572	0.997252	0.997906	1.00921	0.999391	1.00087	1.01021	0.997923	1.00245	0.98834	0.981256	1.00979	1.0083	1.01776	0.998133	0.992124	0.9979	1.02	1.01026
-0.216667	1.37432	1.00908	1.00625	1.00679	0.994237	0.995127	0.993687	0.989211	0.993732	0.99603	0.995327	1.00295	1.0138	0.999405	0.998706	1.00508	0.996313	0.999826	1.0112	1.01027	0.991875	1.01849	1.00932	1.00314	0.978097	0.992484	0.970248	0.990104	0.99152	1.00396	0.992696	0.986773	0.996226	1.00612	1.00206	0.99715	0.998024	0.992655	0.999181	1	0.990799	1.00441	1.00465	1.01512	1.0119	0.991787	1.00232	1.01364	1.01102
-0.189583	1.37421	1.00589	1.01388	0.99344	0.995439	0.988943	0.995289	0.996843	1.00144	0.997752	1.00493	1.00956	1.00506	1.00041	1.00044	0.990899	0.995404	1.00571	1.00949	1.00875	1	1.01587	1.02054	1.00526	0.96896	0.999208	0.983362	0.979156	0.987803	0.989754	0.995028	0.992714	1.00075	1.00143	0.999794	0.994568	1.00808	0.986972	1.00247	0.986802	0.992647	0.999264	0.999456	1.02432	0.999528	0.993561	0.999577	1.00225	1.00619
-0.1625	1.37409	1.00272	1.00153	0.996136	0.991216	0.994129	0.993253	1.00245	1	0.98959	1.01229	1	1.00785	1.00731	1.01598	0.993427	1.00131	1.00069	1.00561	1.00944	0.995201	1.00642	1.0304	1.00428	0.990998	0.984032	0.976918	0.977359	0.991066	1.0037	0.984218	0.984307	0.99697	0.997712	1.00285	1.0024	1.0084	0.997604	0.995645	0.990097	0.993082	0.99048	1.00731	1.01022	1.00848	0.983439	0.997635	1.01129	1.00046
-0.135417	1.37397	1.01065	1.00667	0.994419	1.00315	0.991692	0.998547	0.99447	0.994134	0.996363	0.996976	1.00059	1.00475	1.00851	1.00238	1.00023	1.0095	1.00125	1.00478	1.00444	0.995558	1.02108	1.02734	1.00822	0.976275	0.990037	0.99576	0.972145	0.990423	0.997886	0.995456	0.993138	0.996046	1.00425	1.00164	1.01063	1.00243	0.998421	0.996202	0.995928	0.996042	0.99853	1.01526	1.0191	0.998082	0.992069	0.991944	1.00452	1.01145
-0.108333	1.37385	1.00834	1.01025	0.997272	0.996708	0.993851	0.997408	0.993411	1.00492	0.996176	1.00335	1.01003	1.00303	1.0011	1.00118	0.989861	1.00166	1.00208	1.01099	1.0194	1.00526	1.02298	1.01217	1.00187	0.991495	0.991475	0.982281	0.981097	0.985078	1	0.983803	0.994701	1.00295	1.00125	1.01197	0.99721	1.00587	1.0029	0.993755	0.99489	0.988745	1.00778	1.00552	1.0208	0.995926	0.999779	0.996293	1.00161	0.994835
-0.08125	1.37373	1.00559	1.00354	0.99975	0.995896	0.993407	0.996173	0.99518	0.993225	0.997265	1.00882	1.00304	1.00092	0.999514	1.01516	0.996461	1.00304	1.00554	1.00674	1.01146	1.00268	1.02209	1.01578	1.00828	0.991068	0.98492	0.987673	0.990393	0.984729	0.998429	0.998713	0.993798	0.991455	0.997189	0.998968	1.00716	1.00809	0.999208	0.999458	0.994411	0.997246	0.999088	1.0205	1.01227	1.00956	0.994637	0.997162	1.00346	1.00907
-0.0541667	1.37361	1.00726	1.01044	0.997138	0.990289	0.989466	1.00022	1.00677	0.998145	0.995102	1.00625	1.00946	1.00204	1.01247	1.00136	0.993892	1.00309	0.99825	1.00285	1.00319	1.00208	1.02076	1.02176	1.00325	0.996455	0.981124	0.980348	0.993503	0.995254	1.00047	0.987025	0.998201	0.99443	1.00193	0.999784	1.00965	0.996614	0.99476	0.994009	0.994704	0.996451	1.00516	1.00883	1.0167	1.00804	0.991732	0.996901	1.01171	1.00335
-0.0270833	1.37349	1.0079	1.01617	1.01282	0.988722	1.00096	1.00674	0.996824	1.00616	0.997809	1.00935	1.00373	0.999316	1.01266	1.01179	0.991931	0.989826	0.990065	1.00404	1.01264	1.00316	1.02162	1.0211	1.01341	0.983621	0.988564	0.979463	0.991528	0.983382	0.999764	0.991515	1.00745	0.993709	0.996154	1.00178	1.00379	1.01148	1.00996	0.99538	1.00077	0.997474	1.00552	1.00637	1.02046	1.00438	0.99688	1.0053	1.00776	1.00482
0	1.37337	1.00693	1.00196	0.996606	0.985668	0.986321	1.00138	1.00343	1.00588	0.996934	1.00067	1.01752	1.00897	1.00565	1.00697	0.996827	0.996069	1.00888	1.00903	1.00264	0.992032	1.00672	1.02672	1.00786	0.992891	0.98233	0.984739	0.99883	0.991113	0.999054	0.99249	0.993582	0.9897	0.989676	0.994458	0.998589	1.00158	1.00391	1.00055	0.99544	0.991658	1.00809	1.00475	1.01702	1.01486	0.99602	0.994986	1.00873	1.00794
0.0270833	1.37326	1.00837	1.00722	0.998153	0.997023	0.991144	1.00023	0.99036	0.992404	0.99	1	1.01062	1.00047	1.00788	1.01078	1.01106	0.995121	0.99606	0.993584	1.01769	1.00597	1.02479	1.01603	1.00701	0.993945	0.991437	0.979107	0.978539	0.983112	1	0.996615	0.992255	1.00686	1.00447	0.998097	1.00845	0.998392	0.995419	0.997075	0.990539	0.985147	0.99684	1.00458	1.01312	0.999756	0.993547	0.994707	1.00956	1.0089
0.0541667	1.37314	1.00571	1.01189	0.995033	0.984644	0.997567	1.0028	1.00878	0.99595	0.989854	1.00272	1.00404	1.00234	1.00328	1.01217	0.998386	0.997223	1.0057	1.0035	1.01944	1.00162	1.01939	1.02113	1.01402	0.987598	0.992259	0.991342	0.991231	0.997553	1.00122	0.98701	0.985868	0.995617	0.997242	0.992766	0.997241	0.993346	0.992235	0.992968	0.989997	1.00387	1.00616	0.998708	1.01556	0.994131	1.00405	0.990376	1.00904	1.00452
0.08125	1.37302	0.997182	1.00997	0.99488	0.999468	0.994424	0.997442	0.998844	0.995705	1.00202	1.00183	1.00135	1.01159	1.00715	1.01196	0.998641	0.998125	0.991064	1.00665	0.997918	1.00514	1.01589	1.02712	1.00993	0.985668	0.977798	0.989958	0.992918	0.990038	1.01145	0.994056	0.985587	1.00407	0.995653	0.994364	1.00103	1.00267	0.994136	0.998472	0.987832	0.994554	0.996037	1.01535	1.01648	1.00174	0.989824	0.998673	1.00849	1.01033
0.108333	1.3729	1.01006	1.00792	0.99174	0.994898	0.995967	0.991041	0.999083	0.991724	1.00066	1.00045	1.01018	1.00417	1.00784	1.00306	1.00403	0.996734	1.00712	1.00285	1.00838	1.00681	1.02035	1.0238	0.9984	0.991174	0.977488	0.985938	0.982471	1.00139	0.994814	0.991	0.994256	0.9922	1.00917	1.00533	1.00211	0.998814	0.991754	0.995475	0.991844	0.994717	0.995985	1.00427	1.01467	1.01002	0.996782	0.990397	0.999539	1.00867
0.135417	1.37278	1.00757	1.00624	0.996761	0.99616	0.989093	0.996407	0.995302	1.00357	1.0011	1.00448	1.00268	1.00522	1.00225	0.998621	0.987234	0.989906	1.00022	1.01796	1.01275	1.00135	1.01625	1.0137	0.991758	0.980579	0.995779	0.991121	0.989406	0.999301	0.995822	0.989166	0.98941	0.997626	1.00267	1.00519	1.008	1.00121	1.01344	1.00066	0.991041	0.996474	1.00457	1.01425	1.01276	1.01126	0.982055	0.99131	1.01241	1.01318
0.1625	1.37266	1.01215	0.996577	0.988508	0.989287	0.9941	0.994854	1.00021	1.00023	0.999575	0.994088	0.998002	1.00384	1.01317	1.01324	0.997113	0.9984	0.993063	0.999143	1.01212	0.999227	1.02252	1.01029	1.00366	0.989882	0.989418	0.9811	0.989156	0.983211	1.00498	0.991397	0.985906	1	0.994416	1.00052	1.00332	1.01032	0.99967	0.991636	0.987774	0.998959	0.999092	1.00045	1.01373	1.01051	0.99393	1.00558	1.01323	1.0098
0.189583	1.37255	1.01224	1.0054	0.990995	1.00066	0.993216	0.988656	1.0004	1	0.990305	1.00641	0.997243	0.998887	1.01616	1.00726	0.997699	1.00154	1.00421	1.00272	1.00641	0.996252	1.01895	1.0271	1.00633	0.988151	0.998351	0.983073	0.98884	0.991509	0.990701	0.991885	0.995666	0.995606	1.00427	1.00375	1.00519	1.00618	1.00132	0.991678	1.00289	0.992434	1.00413	1.00811	1.01756	1.00638	0.990736	0.994592	1.00078	1.0053
0.216667	1.37243	1.00327	1.00222	0.994937	0.992999	0.994178	0.999222	1.00515	0.993336	0.99565	1.00451	1.00101	1.00841	1.01762	1	1.00736	0.994852	1	1.009	1.00359	1.00847	1.0176	1.01768	0.998122	0.994262	0.987094	0.989924	0.974566	0.990406	0.998536	0.994589	0.990321	0.992775	1.00273	1.00143	1.00565	1.00461	0.987392	0.98828	1.00197	1.0016	0.992436	1.01311	1.01267	1.006	0.978928	0.998444	1.00898	0.997563
0.24375	1.37231	1.00378	1.0004	0.995702	0.99336	0.990377	0.999226	1.00892	0.995972	0.996158	1.00666	1.00321	1.00411	1.00921	1.00587	1.00511	0.995517	0.996012	0.995346	1.00848	1.00546	1.00749	1.02224	1.02184	0.984783	0.995971	0.985131	0.988809	0.990059	0.986634	0.994466	0.994004	1.0011	0.995578	0.998603	1.01991	1.00461	1.00418	0.994917	0.991396	0.989952	1.00376	1.00878	1.00164	1.00421	0.994048	0.991069	1.0119	1.0144
0.270833	1.37219	1.01252	1.01148	0.992126	0.998485	0.988818	0.99024	0.996963	0.99674	1.0027	1.00783	1.01089	1.00077	1.0022	1.0089	0.997687	0.989798	1.00156	1.00913	1.00022	0.994259	1.01734	1.00941	0.987184	0.98984	0.98317	0.983233	0.975723	0.992775	0.994555	0.996468	0.985698	0.992994	1.00663	1.00117	1.001	1.00481	0.999693	1.00485	0.996302	0.996345	0.996512	1.01496	1.01754	1.00854	1.00139	1.00163	1.00919	0.99837
0.297917	1.37207	1.0115	1.00194	0.995869	0.99767	0.984663	0.994299	0.998898	0.998498	0.992761	1.00451	1.01261	1.00975	1.00558	1.00067	1.00731	1.00308	0.996188	1.00914	1.01037	0.995528	1.01338	1.00971	1.0069	0.964355	0.98319	0.977318	0.989413	0.995925	0.995825	0.987848	0.982965	0.997678	1.00788	1.0119	0.999511	0.99943	0.999094	0.992102	0.992632	0.992487	1.00516	1.00723	1.00672	1.00958	0.992289	0.99319	0.998862	1.00916
0.325	1.37195	0.999198	1.00476	0.984462	0.995343	0.99596	0.990973	1.0053	1.00019	0.997002	0.999098	1.00374	1.00202	1.00549	0.991723	1.00129	1	1.0023	1.00867	1.00859	0.988181	1.01192	1.00946	0.998932	0.984213	0.982073	0.977355	0.985926	0.988915	0.996944	0.994017	0.994545	0.996292	1.00165	1.00335	1.00411	1.00516	1.0021	0.995768	0.995533	0.994345	0.990866	1.00948	1.01705	1.00309	0.990074	1.00528	1.00198	0.995291
0.352083	1.37183	1.00589	1.00361	0.992968	0.986351	0.989893	0.995347	0.99427	0.999436	0.999645	1.0022	1.00396	1.00281	1.00489	1.01042	0.996784	0.989987	1.00351	1.00298	1.00187	0.996546	1.01273	1.02568	1.00391	0.989647	0.996874	0.974175	0.990437	0.993307	1.00463	0.997584	0.987668	0.999804	1.00391	1.00319	0.992392	1.00151	0.994152	0.994604	0.993803	0.999095	1.00162	1.01126	1.02319	1.00774	0.991803	0.994917	1.00729	1.00208
0.379167	1.37172	1.00518	0.998184	0.986156	0.993066	0.991613	0.991358	0.997953	1.00345	0.998904	0.99277	1.00577	1.00414	1.00041	0.999114	0.993543	0.99756	0.996617	1.00794	1.01275	0.997009	1.01502	1.01498	0.986416	0.9817	0.99259	0.977866	0.983544	0.993709	1.00197	0.995218	0.99233	0.988211	1.00073	0.994475	1.00046	1.00449	1.00294	1.00418	0.998362	0.98838	0.989448	1.00971	1.0171	1.00832	0.99117	0.998039	1.00148	1.00546
0.40625	1.3716	1.00477	1.00228	0.991745	0.99911	0.991762	0.996724	0.999809	0.995297	0.994823	0.998874	1.00055	1.00968	1.00084	1.0068	1.00816	0.996766	1.00602	1.00324	0.998724	1.00924	1.00973	1.02748	1.00394	0.986528	0.98141	0.974942	0.982507	0.986059	1.00441	0.992922	0.98675	1.00401	1.00286	0.990035	0.999543	0.995178	0.993114	0.990721	0.990914	0.991387	1.00433	1.00255	1.01291	1.0017	1.00261	0.995345	1.00325	1.00714
0.433333	1.37148	1.00857	1.0041	0.996501	0.990168	0.988769	0.996711	0.999043	1	0.987379	0.998683	1	0.998263	1.00295	1.01146	0.990995	0.999037	0.996749	1.00144	1.01164	0.997571	1.0201	1.01087	1.00107	0.99229	0.981748	0.986535	0.982644	0.993125	0.992124	0.989608	0.982835	0.98294	1.00178	1.0002	0.995781	0.999495	0.995993	0.998894	0.987771	0.983407	0.992906	1.00878	1.00865	0.999442	0.993253	0.997169	1.01282	1.012
0.460417	1.37136	1.00042	1.00605	0.988732	0.981924	0.990558	0.993026	0.998266	0.986821	1.0015	0.99828	1.00261	1.00117	1.00809	1.00116	0.996197	1.00546	0.998902	1.00055	1.01167	0.99734	1.01193	1.02001	0.985875	0.97964	0.975465	0.983322	0.989146	0.993247	0.995608	0.996781	0.988472	0.991951	1.00288	1.00041	0.996952	1.00997	0.995453	0.992267	0.982538	0.997439	1.00206	1.00156	1.00785	1.01787	0.9926	0.996244	1.01023	1.00507
0.4875	1.37124	1.00104	1.00969	1.00446	0.989969	0.990555	0.989057	0.994305	0.995498	0.998899	1.00582	1.00713	1.00213	0.998935	1.00484	0.999325	0.992232	1.0011	1.00257	1.00044	0.994593	1.01991	1.02409	1.00408	0.97985	0.983793	0.984761	0.979808	0.989996	0.992383	0.991393	0.986664	0.990921	0.995551	0.99183	0.996494	1.00494	0.997073	1.00358	0.980047	0.991346	0.995025	1.00452	1.01794	1.00896	0.988063	1.0079	1.00755	1.00815
0.514583	1.37113	1.00855	1.00733	0.996055	0.987597	0.992748	0.990581	1.00076	0.997267	0.999081	0.99869	1.00092	1.00734	0.998528	1.01294	0.990687	0.99726	0.994645	1.01347	1.00108	1.00133	1.01432	1.0109	1.01112	0.989964	0.980519	0.984127	0.976796	0.989527	1.00141	0.991522	0.987182	0.993341	0.996933	1.00544	0.997114	1.00501	1	0.99861	0.997932	0.987582	0.997853	1.02055	1.0077	0.993093	0.992581	0.996861	1.00493	1.00289
0.541667	1.37101	1.01661	1.00822	0.990504	0.991383	1.00142	0.990582	1.00058	0.992915	0.993677	1.00271	1.00472	1.0058	1.00299	1.00995	0.991921	0.996118	0.993241	1.00281	0.997569	0.997317	1.01188	1.02173	0.995522	0.980447	0.989414	0.982019	0.983346	0.989733	0.990414	0.989219	0.989731	0.996746	1.00145	0.993337	0.994362	1.00659	0.990466	0.994396	0.997935	0.998072	1.00907	1	1.00716	1.00708	0.993373	0.992234	1.00319	1.00159
0.56875	1.37089	1.01449	1.00948	1.0031	0.98949	0.999798	1.00098	0.99475	0.994411	0.994137	0.996813	1.00515	0.999605	1.00194	1.00768	0.996203	0.991358	1.00037	1.0053	1.00903	1.01542	1.01102	1.01473	1.00482	0.982085	0.973631	0.986202	0.987046	0.988355	1.00209	0.993566	0.997196	0.991048	0.997294	0.993694	1.00068	0.998474	0.997544	0.993559	0.993766	0.998523	1.0019	1.01596	1.01764	1.00102	1.00327	1.0043	1.00585	0.998246
0.595833	1.37077	0.992093	1.00854	0.995287	0.991977	0.994293	0.988677	1.00181	0.991627	0.99496	1.00428	0.998395	0.999796	1.00457	1.00442	0.990993	0.998052	0.989512	1.00723	1.00532	0.994844	1.00565	1.01742	0.996273	0.975443	0.998335	0.978502	0.980402	0.993308	0.995308	0.988708	0.99242	0.990202	0.999084	0.992169	0.996595	1.00567	0.996977	0.99353	0.987786	0.991755	1.00341	1.0046	1.01651	1.00283	0.994767	0.992146	1.00692	1.01229
0.622917	1.37065	1.00325	1.00808	0.998494	0.98762	0.993057	0.989717	1.00204	0.992075	0.990054	1.0025	1.00021	1.00251	1.00686	1.00564	0.991351	0.989031	0.997367	1.00752	1.00155	0.993956	1.00593	1.02321	0.999627	0.988741	0.969955	0.981843	0.989141	0.979541	0.997915	0.991337	0.993443	0.996806	0.999814	0.996782	0.9918	0.997196	0.998362	1.00339	0.984176	0.9911	0.997552	1.00114	1.00247	0.996012	0.994946	0.991707	0.997832	1.00741
0.65	1.37054	1.00764	0.998301	0.993979	0.97904	0.986493	0.988243	0.998024	0.993987	0.991681	0.994282	1.00343	1.00548	1.00572	1.00707	1.00376	0.993504	1.00059	1.00288	1.00565	0.998641	1.0049	1.02327	0.991698	0.9773	0.982709	0.974991	0.986555	0.980029	0.996404	0.986481	0.98905	0.994735	0.999808	0.996497	1.00327	0.993231	0.989029	0.989406	0.986269	0.988288	1.00365	1.00058	1.01459	1.00479	0.989323	0.996573	1.00432	1.001
	1.37042	1.01421	0.99555	0.988642	0.995192	0.995292	0.993387	0.996514	0.98036	1.00066	1.0009	0.998678	0.998395	1.00327	1.00709	0.982528	0.990351	0.99288	1.00851	1.00119	1.00047	1.00596	1.01769	1.0175	0.975993	0.970528	0.985577	0.983723	0.992517	1	0.996384	0.988137	0.995013	0.998858	1.00242	0.997652	0.988699	0.991902	0.993568	0.998948	0.982957	0.996171	1.00232	1.01785	1.00903	0.99018	1.00295	0.998121	0.994592
	1.3703	1.00373	0.997255	0.988728	0.981572	0.992701	0.991455	0.99387	1.0005	0.999537	1	0.993757	0.996417	1.0109	1.00787	0.990746	1.00023	0.992515	1.01492	0.99975	0.990817	1.02141	1.01594	1.00161	0.987675	1.00257	0.995069	0.984074	0.990155	0.996845	0.994295	0.992932	1.0002	0.994002	1.00417	0.997141	1.00106	0.994898	1.00256	1.00053	0.982908	0.999806	1.01286	1.01737	0.99366	0.982078	0.99525	1.00048	0.997296
	1.37018	1.00614	0.994264	0.983496	0.988844	1.00465	0.992372	1.00122	1.00277	0.998349	0.99783	0.99762	1.00649	1.00323	1.00964	1.00414	0.998823	0.996021	1.00883	1.00823	1.00529	1.01164	1.02317	1.00814	0.98094	0.992084	0.978441	0.979995	0.990989	0.994938	0.976638	0.993984	0.985135	1.00345	0.994979	1.00328	0.994756	0.992651	0.985298	0.985718	0.985143	0.998614	1.00433	1.00488	0.99898	0.995332	0.996562	1.00768	1.00824
	1.37006	1.00559	0.999741	0.997794	0.98606	0.981963	0.990666	1	0.994239	0.987742	1.00144	1.00683	1.00591	1.0076	0.998821	1.00337	0.992081	1.00699	1.00468	1.00775	1.00444	1.00666	1.00534	0.996897	0.971377	0.983235	0.980558	0.991266	0.986032	0.995705	0.985863	0.992989	0.985762	0.996805	0.991071	0.990472	0.995616	0.991599	0.987759	0.99346	0.986374	0.988775	1.01002	1.01352	1.00025	0.985829	0.993312	1.00024	1.0042
	1.36995	1.007	1.0032	0.989498	0.993625	0.988551	0.988352	0.992233	0.988253	0.989827	1.00311	0.98896	1.00732	0.993629	0.999705	0.997993	0.989862	0.984594	1.00903	1.00525	0.990401	1.00831	1.0139	0.987586	0.9971	0.982364	0.982325	0.970426	0.999773	0.984974	0.98246	0.987493	0.995544	1.00095	0.998018	1.00048	0.998944	0.992744	0.990111	0.985487	0.988603	0.9886	1.00121	1.01114	0.988677	0.98423	0.993237	0.997597	1.00905
	1.36983	1.01	1.00079	0.996063	0.984077	0.981481	0.992389	0.990312	1.00351	0.988031	0.999763	0.986794	1.00285	1.0036	0.99858	0.998066	0.995619	1.0014	1.0007	0.996092	0.994921	1.0176	1.00038	1.00898	0.972802	0.979622	0.962632	0.983367	0.994742	0.989796	0.981623	0.987865	0.992696	0.988628	0.993646	0.996943	0.997378	0.986263	0.993638	0.991141	0.993561	0.996785	0.996404	1.01191	1.00104	0.980635	1.00372	1.00901	1.00455
	1.36971	0.994835	1.00305	0.98635	0.975759	0.993961	0.993032	0.989326	0.98797	0.995343	0.998578	0.992534	1.00211	1.00204	1.00856	0.997059	1.00209	0.998878	1	1.01645	0.999712	1.01638	1.00458	1.00239	0.986253	0.976337	0.98725	0.97439	0.988075	0.992904	0.989396	0.980918	0.985658	1.00865	1.00204	0.993821	0.989656	0.978016	0.980758	0.988092	0.984144	1.00259	1.01694	0.999033	1.00341	0.98275	0.99429	0.998521	1.01158
	1.36959	1.00439	0.997692	0.989092	0.979855	0.986027	0.999768	0.993177	0.981622	1.00786	0.998606	0.994853	1.00112	0.994557	1.01036	0.99793	1.00881	0.993524	0.997978	1	0.990654	1.01429	1.01632	1.00428	0.973028	0.980198	0.988666	0.971813	0.992757	0.993616	0.989125	0.9917	0.994061	0.996613	0.992132	1.00222	0.999211	0.998306	0.993335	0.97243	0.986966	0.994296	0.993439	1.00685	0.992972	0.993534	0.987966	0.996795	1.00651
	1.36947	1.01047	0.998195	0.987161	0.985016	0.991606	1	0.992401	0.989233	0.988947	0.997315	0.9921	1.01018	1.00265	0.994462	0.990927	0.982189	0.995024	0.996769	0.999737	0.998652	1.01366	1.01428	0.988279	0.980671	0.991109	0.977283	0.979315	0.990907	0.993609	0.984424	0.993977	0.981128	0.998685	0.999028	1.00156	0.998894	0.999711	0.99414	0.99533	0.986676	0.991597	1.01648	1.01209	1.00314	0.989222	0.997832	1.00902	1.00469
	1.36936	0.993697	1	0.991917	0.979377	0.988338	0.995733	0.991947	0.998302	0.998193	1.00273	0.998942	1.00245	1.00584	0.999483	0.997584	0.99206	0.989863	1.00682	0.998748	0.996489	1.01296	1.00686	0.995387	0.98836	0.988409	0.969777	0.983062	0.986782	0.98814	0.993796	0.984634	0.98663	0.983484	0.999009	0.992198	1.00428	0.996777	0.99588	0.99835	0.991728	1.007	1.00482	1.00924	0.996107	0.980175	0.98805	0.999246	1.00633
	1.36924	0.994217	0.996328	0.986924	0.989359	0.992861	0.984589	0.992126	0.995365	0.997094	0.993605	1.00283	1.00619	1.00331	1.00562	0.988056	0.992178	0.996422	1.0091	1.00371	0.998788	1.01571	1.01108	0.996449	0.995049	0.991727	0.98046	0.983199	0.984026	0.979866	0.985235	0.983871	0.980436	0.992839	0.983867	0.996284	0.995713	0.996723	0.988313	0.99446	0.983066	0.992405	1.00199	1.01414	0.995564	0.987086	0.984202	0.996324	1.00677
	1.36912	1.00761	0.992255	0.985919	0.98133	0.989506	0.982282	0.989431	0.988517	0.993943	1.00292	0.992929	1.0043	0.998875	0.996025	0.990724	0.989379	1.00166	0.998778	0.989801	0.989056	1.00324	1.02215	0.992818	0.976526	0.987946	0.981427	0.974579	0.98899	0.992975	0.988767	0.979921	0.994043	1.00504	0.993522	0.991427	1.00366	0.986838	0.990789	0.978504	0.980198	1.00183	1.00205	1.01061	0.994466	0.990247	0.983505	0.997477	0.993005
	1.369	1.00357	0.998135	0.991829	0.975388	0.992635	0.986827	0.985393	0.99444	0.984296	0.998068	0.998085	1.002	0.998257	0.996432	0.9934	0.987298	0.985899	0.999215	0.996006	0.987551	1.01542	1.01715	0.988163	0.970982	0.977581	0.966483	0.976	0.979693	0.987193	0.985581	0.986322	0.991028	0.995379	0.990358	0.9931	0.997769	0.987694	0.989596	0.987076	0.988944	1.0054	0.995746	1.00165	1.01084	0.98017	0.978608	1.00348	0.994309
	1.36888	0.999369	1.00376	0.982227	0.985451	0.983657	0.991565	0.986296	0.990702	0.986988	1.0047	0.990004	1.00482	0.996049	0.997622	0.986618	0.981966	0.995916	0.994872	1.00998	0.994813	1.01174	1.00523	0.983797	0.975803	0.977048	0.978854	0.990105	0.988407	0.995043	0.985714	0.985478	0.987073	0.990914	0.996018	0.996691	1.00833	0.981973	0.990829	0.987176	0.990308	1.0015	1.00213	1.012	0.995496	0.980458	0.998049	0.998486	1.00843
	1.36877	1.00873	0.992918	0.982456	0.983889	0.985059	0.990111	0.994741	0.988609	0.991474	0.985756	1.00252	0.997785	0.995235	0.99738	0.993916	0.98697	0.991256	1.00284	1.00023	0.989515	1.00976	1.01583	0.987765	0.97912	0.981141	0.983764	0.975927	0.985542	0.994674	0.988326	0.98667	0.981543	0.98954	0.989613	0.980072	0.987201	0.994685	0.987589	0.987391	0.9843	0.992527	0.995173	1.00941	1.00644	0.977556	0.996798	0.997946	1.00162
	1.36865	0.988406	0.997469	0.981158	0.989869	0.990395	0.98483	0.982243	0.984302	0.987861	0.989557	1.00373	0.994886	0.992902	0.992039	0.987019	0.995858	0.986694	1.01213	1.00383	0.992042	1.00073	1.00683	0.996367	0.972426	0.968528	0.972131	0.972056	0.988501	0.989936	0.990155	0.977325	0.982979	0.991476	0.996007	0.987466	1.00103	0.989397	0.997406	0.980392	0.994589	0.983707	1.008	1.00794	0.990791	0.989256	0.98755	0.993947	1.00739
	1.36853	1.00063	0.998303	0.980309	0.986574	0.976696	0.991073	0.986312	0.988401	0.975766	0.992368	0.99901	1.00371	0.998426	1.00597	0.993892	0.98497	0.991827	0.99609	1.00135	1.00495	1.00355	1.00929	0.989307	0.968989	0.977424	0.980572	0.976006	1.00133	0.985352	0.989376	0.986021	0.994517	0.98983	0.995173	1.00435	0.993522	0.987659	0.989434	0.985664	0.980162	0.98372	1.01705	1.0028	0.989654	0.986531	0.991411	0.996481	1.01052
	1.36841	1.0015	0.996542	0.983758	0.981734	0.985143	0.985378	0.991566	0.986131	0.989154	0.99052	0.999801	0.992554	0.996796	0.991111	0.985507	0.982644	0.996724	0.992254	0.993739	0.990083	1.00742	1.0028	0.990661	0.987696	0.977103	0.978022	0.969546	0.9835	0.988658	0.978728	0.989742	0.989497	0.993236	1	0.995404	0.985488	0.986147	0.99172	0.977848	0.985185	0.999743	1.01225	1.00089	0.9875	0.978939	0.988685	0.989327	0.998457
	1.3683	0.995008	0.998462	0.98189	0.988117	0.980589	0.984504	0.984104	0.985068	0.992849	0.994281	0.990042	0.993571	0.997024	0.994257	0.988865	0.990455	0.99883	0.993278	0.99931	0.99226	0.99814	1.00123	0.982811	0.978342	0.972381	0.978441	0.976486	0.978779	0.976524	0.986153	0.983263	0.989664	0.993001	0.998695	0.98602	0.984297	0.993156	0.987575	0.990826	0.973409	1	0.989788	1.01058	0.98668	0.989753	0.995842	0.994809	1.00422
	1.36818	0.992725	1.00753	0.981641	0.990259	0.98413	0.98629	0.982363	0.985236	0.981998	0.986623	0.984924	1.00419	0.995673	0.996774	0.981412	0.988156	0.987117	0.994377	0.997933	0.979521	1.00237	1.00739	0.995094	0.981217	0.975241	0.967697	0.965794	0.983213	0.983238	0.979055	0.992527	0.993934	0.981966	0.989759	0.988761	0.987925	0.988862	0.98513	0.989521	0.991188	0.990991	1.00284	0.995732	0.98996	0.970704	0.99693	0.992188	1.01085
	1.36806	0.992683	0.993704	0.974929	0.978546	0.9873	0.981316	0.991808	0.983692	0.991348	0.994246	0.980865	0.992923	0.996563	1.00025	0.978843	0.985994	0.978778	0.989447	0.998601	0.981256	1.00896	1.00628	0.980579	0.977077	0.968685	0.974439	0.975147	0.975906	0.984425	0.984218	0.975877	0.996035	0.992497	0.993176	0.997021	0.984733	0.996308	0.994622	0.977559	0.983894	0.988903	1.00077	1.00701	0.989718	0.986014	0.985312	0.987836	0.987022
	1.36794	0.996033	0.986778	0.983633	0.969007	0.969852	0.976705	0.993199	0.979171	0.98613	0.998359	0.98755	0.988348	0.9936	1.00829	0.980355	0.986217	0.984025	0.998829	0.998589	0.988263	1.01098	1.01284	0.992546	0.976926	0.968187	0.969363	0.971429	0.981259	0.991814	0.982795	0.983922	0.984194	0.990364	0.991122	0.994809	0.994444	0.995229	0.980485	0.978807	0.972371	0.996519	0.999001	0.993161	0.997416	0.977823	0.996723	1.00691	0.997677
	1.36783	0.999334	0.990708	0.982876	0.983532	0.982324	0.981493	0.986915	0.981215	0.985427	0.987783	0.993605	0.994748	0.986667	0.99573	0.985453	0.980675	0.989007	0.995679	1.00047	0.986127	1.00758	1.01675	0.990913	0.980591	0.978186	0.979306	0.967601	0.977119	0.979863	0.977153	0.979616	0.984223	0.992165	0.985258	0.990117	0.991384	0.985432	0.987013	0.986179	0.976203	0.997856	1.00338	1.01118	0.981378	0.983295	0.988299	0.979988	1.00947
	1.36771	0.991906	0.988079	0.97628	0.976019	0.973775	0.99544	0.978641	0.983285	0.992297	0.991232	0.994158	0.99521	0.992834	0.991355	0.989011	0.979324	0.990476	0.99218	0.983071	0.981425	1.01057	1.01485	0.990461	0.968925	0.974015	0.963306	0.970066	0.979579	0.985026	0.977312	0.971642	0.981414	0.993459	0.986283	0.992138	0.99573	0.97985	0.99719	0.9799	0.987605	0.997303	0.990547	0.996141	0.997604	0.986412	0.979728	0.991733	1.01638
	1.36759	1.00111	0.991723	0.977762	0.978313	0.978115	0.978943	0.98723	0.978891	0.989528	0.985351	0.997983	0.992296	0.98866	0.999246	0.98259	0.995042	0.980554	0.994337	0.987631	0.989875	1.0059	1.00679	0.990016	0.97931	0.981041	0.968594	0.971823	0.991341	0.988779	0.975589	0.967039	0.97789	0.998255	0.986953	0.989054	0.993088	0.974854	1.00093	0.990662	0.986493	0.993425	0.990387	0.998979	0.990953	0.972782	0.980506	1	1.00282
	1.36747	0.998393	0.982069	0.981613	0.975132	0.981284	0.973389	0.980124	0.980745	0.9895	0.984339	0.998566	0.995767	0.989943	0.990486	0.980443	0.983767	0.984221	0.997443	1.00119	0.987503	1.01117	0.99967	0.985496	0.978346	0.966505	0.982847	0.976281	0.985798	0.981616	0.973316	0.966986	0.980933	0.987329	0.982123	0.986836	0.994437	0.989343	0.972653	0.978445	0.974347	0.987884	0.99322	1.00471	0.994284	0.979494	0.986442	0.989869	0.99753
	1.36736	0.988433	0.982607	0.982042	0.985606	0.978691	0.983627	0.980482	0.979264	0.978932	0.993777	0.980404	0.994886	0.997681	0.983034	0.985155	0.982527	0.995729	0.990163	0.999525	0.988079	0.99782	1.00908	0.98358	0.968376	0.987692	0.967754	0.981238	0.982554	0.985118	0.985616	0.985619	0.981769	0.984433	0.989218	0.976327	0.985123	0.988178	0.982728	0.980425	0.992113	0.992731	0.995916	1.01523	1.00316	0.984772	0.990603	0.998711	0.987602
	1.36724	0.992854	0.979869	0.964785	0.962905	0.986228	0.98498	0.976699	0.977944	0.993017	0.986726	0.992211	0.998442	0.993839	0.985352	0.985874	0.994205	0.989251	0.997287	0.991201	0.982448	0.998519	1.00656	0.981899	0.962741	0.984703	0.989729	0.976946	0.979716	0.982404	0.985734	0.98811	0.98023	0.988457	0.98556	0.975485	0.983083	0.986163	0.989234	0.976673	0.971239	0.983248	0.989495	1.00536	0.991223	0.975412	0.986189	0.995658	1.00289
	1.36712	0.991434	0.984604	0.973787	0.973829	0.97774	0.977727	0.982701	0.976434	0.988894	0.979787	0.987508	0.986076	0.992844	0.994502	0.978234	0.982522	0.988819	1.0002	0.983415	0.992395	1	1.01222	0.982215	0.975203	0.980778	0.974836	0.978302	0.979352	0.978365	0.978628	0.980227	0.983518	0.98317	0.982599	0.98791	1.0011	0.978899	0.97688	0.987815	0.976023	0.98606	1.00103	1.00937	0.98628	0.974007	0.984995	0.993242	0.991113
	1.367	0.988922	0.9904	0.976439	0.97303	0.987432	0.985443	0.975615	0.974834	0.984425	0.991688	0.993657	0.999064	0.983187	0.982038	0.981879	0.982912	0.988726	1.00079	1.00024	0.990145	1.00715	1.00959	0.983387	0.961017	0.972043	0.97546	0.974297	0.968085	0.979246	0.978733	0.970392	0.983648	0.985578	0.985681	0.980056	0.972517	0.986055	0.983036	0.979017	0.974743	0.994294	0.998765	1.00487	0.991216	0.978811	0.984545	0.994471	0.997121
	1.36689	0.998019	0.986641	0.973662	0.970515	0.982827	0.976023	0.983274	0.985923	0.988258	0.982669	0.991907	0.995038	0.999458	0.995936	0.979447	0.974775	0.981551	0.987912	0.990868	0.990099	1.00174	1.00327	0.989817	0.968227	0.973163	0.965567	0.977766	0.988839	0.973731	0.983595	0.972705	0.978335	0.9865	0.988051	0.99319	0.975583	0.989887	0.981325	0.985012	0.982378	0.990961	0.994628	1.00171	0.99377	0.981594	0.987654	0.996163	0.997896
	1.36677	0.988242	0.985867	0.968618	0.982914	0.972859	0.98281	0.981477	0.980318	0.970838	0.982474	0.983533	0.979114	0.979305	0.989657	0.983306	0.986508	0.981546	0.992761	0.991163	0.973938	0.99629	0.996433	0.987932	0.968126	0.962882	0.976122	0.968641	0.979089	0.980058	0.972142	0.969916	0.983005	0.978906	0.989197	0.991862	0.979694	0.979278	0.989526	0.98287	0.973625	0.988984	0.99629	0.994691	0.995991	0.980188	0.988894	0.990807	0.988684
	1.36665	0.997431	0.987833	0.976022	0.979776	0.975216	0.977206	0.988339	0.97455	0.980142	0.972817	0.989302	0.990385	0.993275	0.985446	0.980519	0.975	0.992069	0.992857	0.990693	0.984848	0.997127	1.01146	0.993001	0.975185	0.975243	0.960862	0.966468	0.983259	0.987302	0.97139	0.970747	0.982762	0.98793	0.993833	0.996108	0.987113	0.975698	0.978551	0.977463	0.97643	0.985174	0.995997	0.998272	0.993538	0.974835	0.985895	0.986818	0.991416
	1.36654	0.987962	0.981277	0.975794	0.975248	0.990155	0.983196	0.994678	0.977843	0.998737	0.990304	0.987371	0.984127	1.0012	0.984958	0.97881	0.981402	0.98644	0.990192	0.991062	0.981059	1.00273	0.999659	0.994503	0.959667	0.972198	0.972934	0.97217	0.97229	0.990718	0.980253	0.974037	0.991975	0.98355	0.986735	0.992945	0.989563	0.982535	0.971948	0.983866	0.970697	0.99383	0.997459	0.995268	0.989417	0.984298	0.989079	0.995121	0.991987
	1.36642	0.994562	0.985528	0.980857	0.970186	0.981121	0.978577	0.990091	0.970113	0.989014	0.98219	0.986365	0.986764	0.98244	0.999358	0.986659	0.986273	0.977899	0.984558	0.987695	0.979896	0.993664	1.00575	0.986415	0.987603	0.967727	0.963125	0.98088	0.965952	0.984347	0.979973	0.972338	0.974827	0.991037	0.981822	0.988847	0.984663	0.982483	0.985885	0.975991	0.973111	0.983964	0.997201	0.993027	0.99558	0.972859	0.980842	0.981601	0.996216
	1.3663	0.989891	0.994395	0.980614	0.980633	0.9715	0.994407	0.984123	0.977085	0.984959	0.980709	0.987283	0.995646	0.986745	0.986349	0.976283	0.981355	0.981581	0.987575	0.99519	0.981298	1.00784	1.01384	0.972122	0.977099	0.972407	0.980362	0.970564	0.975278	0.989627	0.974686	0.97224	0.97711	0.983874	0.990436	0.991076	0.978854	0.975163	0.979006	0.978963	0.971729	0.989966	0.989353	1.00153	0.989978	0.981736	0.988241	0.988406	0.993996
	1.36618	0.996923	0.986223	0.980824	0.984555	0.986788	0.979069	0.982586	0.975	0.976709	0.980789	0.984947	0.979841	1	0.977472	0.973645	0.977496	0.98275	0.990855	0.996467	0.990043	0.986721	1.00994	0.965137	0.97517	0.97451	0.965735	0.969048	0.984727	0.980314	0.978806	0.970334	0.987155	0.99918	0.983785	0.99292	0.973872	0.982712	0.977914	0.975443	0.973556	0.978205	0.99095	1.00076	0.992333	0.97875	0.983682	0.998407	0.989442
	1.36607	0.993189	0.981903	0.973123	0.986697	0.982252	0.970978	0.971297	0.970992	0.984719	0.9882	0.992563	0.986764	0.992096	0.981889	0.988488	0.983208	0.9888	0.986176	0.987303	0.987427	1.00211	1.00388	0.985929	0.962038	0.98001	0.958214	0.975951	0.965797	0.980599	0.979231	0.983404	0.978941	0.990363	0.992097	0.994158	0.987754	0.989273	0.983344	0.976884	0.975063	1.00022	0.99589	0.992268	0.994212	0.965345	0.981387	0.993872	0.995877
	1.36595	0.988188	0.986017	0.974208	0.974788	0.976621	0.975698	0.979249	0.974245	0.986699	0.991375	0.981137	0.98118	0.99181	0.99202	0.983592	0.975825	0.988664	0.986634	0.978507	0.986944	1.00031	1.01364	0.977587	0.971614	0.962909	0.97764	0.976641	0.982542	0.978305	0.976343	0.973833	0.979539	0.98614	0.993665	0.991342	0.990473	0.991042	0.97934	0.971121	0.975548	0.990434	0.994084	1.00815	0.986581	0.973991	0.985923	0.986462	0.987593
	1.36583	0.986336	0.989102	0.972383	0.964259	0.975566	0.978921	0.98395	0.975327	0.981297	0.986836	0.988136	0.989578	0.986286	0.98232	0.985869	0.985722	0.986875	0.990226	0.983508	0.991013	1.00508	0.99467	0.969864	0.984785	0.979645	0.979176	0.9713	0.981432	0.985378	0.975941	0.982493	0.982633	0.988432	0.988767	0.995074	0.983518	0.971394	0.991266	0.980858	0.987092	0.980703	0.992602	1.00127	0.981573	0.972572	0.980872	0.988372	0.996194
	1.36572	0.986822	0.990243	0.973391	0.97138	0.975148	0.9853	0.98238	0.986627	0.985667	0.988399	0.985572	0.983902	0.996449	0.992727	0.990809	0.970857	0.976504	0.993602	0.990964	0.981026	1.00189	1.00289	0.985787	0.972566	0.968348	0.968875	0.970521	0.98015	0.980339	0.980403	0.966523	0.984975	0.984273	0.981953	0.986779	0.988469	0.967169	0.97681	0.974477	0.980437	0.982267	0.983561	0.994125	0.994121	0.984623	0.980779	0.979443	0.99891
	1.3656	0.992878	0.988052	0.973466	0.979092	0.978952	0.979772	0.984751	0.983286	0.986848	0.987861	0.985136	0.982671	0.979496	0.991282	0.994161	0.98811	0.984327	0.98541	0.982914	0.983837	1.00699	1.00958	0.968166	0.988474	0.963401	0.96862	0.969471	0.979684	0.971629	0.975305	0.976102	0.979975	0.981282	0.982489	0.996571	0.977565	0.984863	0.986947	0.978337	0.980966	0.98867	0.999344	0.989484	0.981389	0.969372	0.99013	0.985775	0.996219
	1.36548	0.978961	0.976692	0.978607	0.986074	0.964072	0.973784	0.98322	0.971319	0.979459	0.979524	0.991326	0.985363	0.98381	0.987328	0.980599	0.985849	0.986692	0.986833	0.980529	0.990482	0.999371	1.00464	0.982252	0.97885	0.967923	0.968591	0.967609	0.980747	0.983237	0.983533	0.977176	0.974392	0.988847	0.988726	0.978032	0.983398	0.976729	0.974233	0.979507	0.974439	0.984529	1.00153	0.992589	0.98513	0.972881	0.974753	0.982555	0.990929
	1.36536	0.987643	0.977483	0.971008	0.964829	0.975387	0.976353	0.98103	0.963606	0.972085	0.989973	0.98423	0.996557	0.983611	0.995821	0.976319	0.968366	0.981304	0.996974	0.997148	0.988711	1.0003	1	0.984655	0.983014	0.976004	0.969949	0.956014	0.982091	0.976246	0.973669	0.970756	0.972172	0.984123	0.985928	0.983835	0.98207	0.992532	0.983675	0.970195	0.966413	0.98699	0.990321	0.992109	0.992351	0.972126	0.985139	0.978718	0.982721
	1.36525	0.988683	0.99169	0.981942	0.975924	0.974359	0.967648	0.978008	0.977325	0.976558	0.981295	0.989075	0.987267	0.989184	0.981545	0.980099	0.974071	0.980105	0.990222	0.98139	0.988066	0.997942	0.999208	0.993599	0.976022	0.972036	0.968173	0.974965	0.974971	0.979508	0.988389	0.966138	0.979345	0.980804	0.986612	0.985696	0.988302	0.977364	0.975663	0.979579	0.976546	0.975711	0.992126	1.00108	0.985803	0.976675	0.981634	0.982934	0.993606
	1.36513	0.985511	0.978065	0.977143	0.977497	0.971523	0.981887	0.978001	0.978687	0.978467	0.986801	0.991855	0.986099	0.984243	0.986555	0.985129	0.981667	0.99171	0.987374	0.996135	0.984806	0.995697	0.993524	0.975291	0.971588	0.968835	0.980081	0.975787	0.971847	0.9777	0.976074	0.969769	0.98398	0.980484	0.978578	0.997792	0.991175	0.977894	0.981859	0.983903	0.972245	0.983948	0.987077	0.993105	0.984985	0.974461	0.979121	0.982725	0.99716
	1.36501	0.989775	0.989988	0.965157	0.973257	0.972692	0.976303	0.975893	0.966188	0.968787	0.985504	0.989241	0.987862	0.988224	0.994415	0.985203	0.990468	0.982554	0.987231	0.994011	0.989128	0.996419	0.989454	0.982854	0.965689	0.964249	0.979897	0.970745	0.972446	0.972319	0.982659	0.963544	0.985395	0.985251	0.98826	0.989889	0.980844	0.99465	0.9853	0.969377	0.97514	0.989927	1.00024	0.989586	0.988268	0.982183	0.982183	0.991511	0.989052
	1.3649	0.988628	0.983599	0.975688	0.969469	0.971067	0.976185	0.985782	0.981051	0.978115	0.976644	0.990117	0.982668	0.986282	0.994418	0.987648	0.977453	0.982624	0.990764	0.990887	0.984553	0.984848	0.999279	0.984127	0.972236	0.981809	0.978834	0.971675	0.980203	0.988526	0.982	0.975066	0.98332	0.984551	0.986252	0.98735	0.97152	0.983619	0.972329	0.977457	0.973873	0.988248	0.997235	0.9942	0.996231	0.978519	0.986056	0.994526	0.994553
	1.36478	0.991628	0.981969	0.968242	0.968274	0.980148	0.971932	0.972909	0.976185	0.986195	0.984164	0.989203	0.981553	0.988876	0.992102	0.986344	0.984889	0.98424	0.990811	0.98692	0.98643	0.999229	1.0087	0.988265	0.967517	0.978357	0.965745	0.980903	0.974019	0.983738	0.969282	0.969761	0.973409	0.986779	0.981132	0.978655	0.992089	0.966983	0.973518	0.971685	0.97863	0.976223	0.991931	0.997241	0.988925	0.971851	0.982558	0.985376	0.994102
	1.36466	0.982338	0.983368	0.977981	0.965687	0.982285	0.982371	0.972609	0.98	0.973046	0.989474	0.984405	0.984569	0.995476	0.985634	0.981849	0.978934	0.976321	0.994458	0.984229	0.979196	0.998008	0.988819	0.988207	0.95879	0.970954	0.964859	0.985813	0.972299	0.976368	0.979861	0.973763	0.983753	0.97921	0.977672	0.99168	0.985749	0.979424	0.986177	0.97076	0.96852	0.991578	0.99011	1.0013	0.986007	0.966346	0.986069	0.968292	0.993229
	1.36455	0.990291	0.98156	0.970799	0.978492	0.977707	0.983417	0.983158	0.977744	0.966077	0.990765	0.975579	0.980298	0.978779	0.978065	0.979019	0.982605	0.977844	0.985763	0.990097	0.982444	1.00025	1.00494	0.979535	0.956915	0.954505	0.975449	0.970349	0.977301	0.976113	0.977267	0.971161	0.978145	0.981542	0.984934	0.990609	0.997198	0.975921	0.971884	0.978677	0.982022	0.988559	0.993723	0.995794	0.985649	0.972722	0.965592	0.990711	0.985033
	1.36443	0.988235	0.978225	0.966008	0.975561	0.962323	0.977948	0.978908	0.972878	0.981179	0.98185	0.987863	0.983846	0.988712	1.00161	0.981505	0.97639	0.979493	0.97943	0.99313	0.977751	0.996674	0.985648	0.985203	0.978612	0.961387	0.959657	0.960331	0.973628	0.96502	0.971075	0.975144	0.971927	0.985308	0.985406	0.985159	0.984071	0.975565	0.979584	0.982955	0.975245	0.978457	0.98358	0.988558	0.985175	0.97013	0.975172	0.984005	0.975252
	1.36431	0.984982	0.991082	0.978223	0.972491	0.982579	0.981858	0.985078	0.968316	0.983138	0.986501	0.994635	0.996209	0.990951	0.993384	0.979271	0.974112	0.977291	0.989444	0.982729	0.974922	1.00177	1.00535	0.971974	0.966782	0.967572	0.968085	0.956105	0.967125	0.982159	0.977539	0.96615	0.977313	0.985594	0.986791	0.989024	0.981394	0.983471	0.966296	0.977008	0.96875	0.983367	1.00364	0.987666	0.979464	0.964475	0.9732	0.994651	0.991611
	1.36419	0.979986	0.979252	0.977041	0.954648	0.968772	0.984694	0.971091	0.966885	0.982504	0.990194	0.981517	0.982183	0.990067	0.980518	0.9819	0.986597	0.985059	0.987593	1.00126	0.993144	0.990051	0.989097	0.990833	0.972735	0.962356	0.975917	0.968019	0.980009	0.982955	0.970687	0.977268	0.965015	0.979212	0.996966	0.996927	0.985019	0.985234	0.978026	0.983541	0.979531	0.990179	0.993503	1.00218	0.978599	0.972947	0.976661	0.980386	0.99686
	1.36408	0.988021	0.982207	0.970066	0.966059	0.971072	0.97526	0.981486	0.970263	0.981706	0.982504	0.979	0.984802	1.00147	0.984085	0.985287	0.966406	0.979802	0.992409	0.983004	0.989297	1.00848	0.996584	0.967662	0.989872	0.978533	0.972374	0.969223	0.971921	0.972259	0.9726	0.980343	0.978585	0.986194	0.985396	0.982956	0.987375	0.986854	0.993966	0.972791	0.977285	0.981709	0.980909	1.00175	0.977939	0.962131	0.989358	0.983791	0.990351
	1.36396	0.982604	0.975	0.972879	0.967964	0.971347	0.974593	0.975541	0.973261	0.974897	0.986593	0.979966	0.986381	0.978952	0.994204	0.968612	0.982105	0.978309	0.993477	0.987676	0.985742	1.00182	0.985369	0.979062	0.970758	0.967279	0.96444	0.967134	0.974136	0.986566	0.975787	0.97332	0.971245	0.979525	0.979509	0.980159	0.986253	0.977975	0.97085	0.978932	0.969511	0.977636	1	0.996526	0.984157	0.965006	0.995597	0.986125	0.988001
	1.36384	1.00103	0.984176	0.958368	0.972618	0.967312	0.977035	0.97162	0.960078	0.979012	0.984839	0.985062	0.98769	0.989843	1.00585	0.987892	0.9841	0.983932	0.992262	0.995565	0.985528	0.992049	0.993058	0.966959	0.974003	0.971749	0.962257	0.967524	0.981216	0.979391	0.982852	0.975082	0.976797	0.981402	0.983505	0.984339	0.983416	0.977867	0.966585	0.981407	0.967526	0.987633	0.989806	1.00117	0.989264	0.968822	0.976862	0.980689	0.986708
	1.36373	0.990932	0.969359	0.959478	0.964747	0.974516	0.976248	0.9686	0.979991	0.975843	0.968311	0.983704	0.985922	0.985042	0.982001	0.983504	0.983188	0.983504	0.989516	0.990182	0.978723	0.991952	1.0017	0.98218	0.967132	0.96229	0.953006	0.972472	0.978978	0.975148	0.969447	0.963048	0.966687	0.982488	0.986427	0.971479	0.980293	0.986719	0.978882	0.987697	0.967187	0.980591	0.98604	0.996921	0.976555	0.979989	0.983631	0.979167	0.981114
	1.36361	0.994198	0.974315	0.964508	0.983582	0.96732	0.973127	0.977828	0.975224	0.96839	0.969876	0.984358	0.997485	0.985419	1	0.981378	0.972265	0.975283	0.988852	0.995298	0.974201	0.992798	0.99724	0.97275	0.971326	0.980672	0.973284	0.978947	0.980522	0.981643	0.975665	0.967701	0.97135	0.973438	0.984416	0.977817	0.994084	0.991002	0.97558	0.984366	0.969724	0.988428	0.998929	0.987579	0.986593	0.964356	0.967761	0.99328	0.994887
	1.36349	0.988983	0.977739	0.969144	0.976087	0.985254	0.976123	0.96965	0.974019	0.97473	0.984598	0.984056	0.975456	0.981961	0.986568	0.970574	0.975652	0.980821	0.989225	0.984627	0.989133	0.994632	1.00444	0.976678	0.964145	0.972653	0.967303	0.972763	0.968214	0.969933	0.973929	0.970774	0.980192	0.978524	0.982623	0.985448	0.98667	0.973117	0.978606	0.971926	0.980031	0.976358	0.998095	0.988384	0.983347	0.96948	0.972065	0.990926	0.987078
	1.36338	0.983565	0.969956	0.977485	0.984948	0.975525	0.967308	0.975845	0.964567	0.984465	0.986003	0.985391	0.985064	0.981187	0.991309	0.978158	0.975325	0.992405	0.982391	0.98614	0.9791	0.992965	1.00793	0.970223	0.969724	0.987238	0.967153	0.964375	0.965124	0.971129	0.971494	0.974293	0.972793	0.98946	0.983973	0.984424	0.979184	0.982451	0.972674	0.971743	0.97868	0.986418	0.996169	1.00303	0.988439	0.975346	0.977596	0.977567	0.990325
	1.36326	0.990871	0.972599	0.975055	0.966892	0.978447	0.977363	0.981399	0.969981	0.975843	0.988339	0.984765	0.985193	0.981743	0.986741	0.977568	0.986427	0.981737	0.985962	0.99186	0.985045	0.994184	1.00524	0.976869	0.970315	0.978339	0.970242	0.966271	0.978768	0.978753	0.973636	0.979474	0.981358	0.989962	0.991858	0.985923	0.986517	0.975008	0.975389	0.97308	0.974353	0.98569	1.00382	0.998997	0.985318	0.986758	0.976969	0.990078	0.984127
	1.36314	0.971462	0.976085	0.981341	0.96767	0.978402	0.987832	0.970825	0.96724	0.980129	0.981642	0.980053	0.98119	0.994922	0.983172	0.984546	0.977988	0.978396	0.997151	0.988988	0.995012	0.991541	1.00535	0.995382	0.973847	0.970975	0.975921	0.967724	0.969346	0.980974	0.971481	0.969554	0.980472	0.98397	0.991994	0.979795	0.982992	0.982922	0.979391	0.975386	0.982246	0.985087	0.991527	0.988645	0.985468	0.975901	0.980196	0.994613	0.978378
	1.36303	0.983686	0.969249	0.967276	0.971292	0.974609	0.979231	0.971516	0.985117	0.983289	0.984041	0.976533	0.99049	0.984069	0.981585	0.980251	0.972854	0.989491	0.993017	0.990164	0.984457	0.989788	0.993277	0.972527	0.965935	0.983974	0.966643	0.97375	0.976454	0.988429	0.977097	0.970133	0.982963	0.987604	0.996131	0.985647	0.986705	0.973427	0.988935	0.98314	0.973112	0.989653	0.992738	0.994221	0.982913	0.962936	0.972085	0.98095	0.996556
	1.36291	0.980168	0.969715	0.963712	0.974968	0.965708	0.970145	0.977349	0.970083	0.983759	0.978506	0.978752	0.986824	0.983186	0.978498	0.980727	0.975309	0.972422	0.984682	0.973968	0.985313	0.991729	0.992632	0.981156	0.970891	0.973136	0.970308	0.965704	0.983051	0.978615	0.979629	0.973612	0.972452	0.977119	0.985458	0.984821	0.98129	0.978287	0.97728	0.976067	0.979297	0.976655	0.98234	0.995475	0.981784	0.963986	0.985152	1.00439	0.986337
	1.3628	0.981917	0.980633	0.96455	0.967581	0.962329	0.982422	0.958636	0.980409	0.982796	0.974973	0.985179	0.98634	0.98564	0.984512	0.980089	0.979815	0.979424	0.984175	0.991796	0.978383	1.00279	1.00219	0.980085	0.965704	0.968924	0.972779	0.962192	0.968058	0.983333	0.97214	0.972288	0.990105	0.985966	0.980505	0.978523	0.98829	0.977538	0.973709	0.967107	0.972268	0.979853	0.987061	1.00129	0.975465	0.969542	0.988012	0.979215	0.988341
	1.36268	0.998194	0.975925	0.969056	0.970489	0.965527	0.966526	0.964898	0.976847	0.983689	0.987414	0.969849	0.976455	0.989935	0.981095	0.986042	0.969957	0.978272	0.985828	0.977812	0.98005	0.986558	1.0085	0.968643	0.95598	0.971869	0.961286	0.959211	0.977677	0.98158	0.971694	0.97408	0.985618	0.979996	0.984659	0.994547	0.982199	0.97897	0.971241	0.97248	0.969099	0.974806	0.980273	0.978582	0.989094	0.966667	0.985649	0.987686	0.984052
	1.36256	0.986059	0.980735	0.967792	0.969623	0.974062	0.981624	0.981671	0.968121	0.969603	0.98686	0.981402	0.985298	0.983761	0.983328	0.980964	0.972222	0.98151	0.979518	0.969687	0.981381	0.994721	0.991147	0.966413	0.977348	0.965631	0.96767	0.956131	0.973923	0.978768	0.960356	0.965561	0.964735	0.98626	0.979909	0.976166	0.984848	0.972146	0.981288	0.961404	0.971601	0.976769	0.984402	0.996351	0.983416	0.963555	0.981491	0.982124	0.994416
	1.36245	0.995845	0.978304	0.978025	0.967169	0.95926	0.971757	0.977589	0.976774	0.982086	0.986767	0.980647	0.982183	0.972463	0.990378	0.971599	0.975635	0.976506	0.974399	0.976553	0.982638	0.98592	0.992525	0.975191	0.962439	0.972045	0.967288	0.967795	0.981619	0.96864	0.979416	0.967749	0.973607	0.981659	0.968654	0.969898	0.973543	0.972474	0.971402	0.973854	0.98269	0.982278	0.989207	1.00183	0.980609	0.970595	0.982487	0.987536	0.999729
	1.36233	0.98921	0.983629	0.96996	0.979244	0.971206	0.974956	0.977404	0.977591	0.970392	0.978071	0.971436	0.977522	0.990126	0.991575	0.978438	0.97069	0.989431	0.980114	0.992123	0.980694	0.983803	0.993945	0.977551	0.970266	0.970648	0.960978	0.965418	0.971732	0.983514	0.976952	0.973464	0.9761	0.977235	0.980651	0.989145	0.984055	0.968126	0.971145	0.970944	0.967251	0.988749	0.989747	1.00103	0.988356	0.970881	0.965248	0.976999	0.988098
	1.36221	0.982873	0.990605	0.979586	0.976618	0.975719	0.984641	0.979552	0.976639	0.984427	0.982699	0.986667	0.99486	0.989362	0.98688	0.972655	0.977111	0.987081	0.994923	0.991885	0.97787	0.987383	0.999566	0.976769	0.987307	0.961249	0.964171	0.964737	0.971029	0.965268	0.975051	0.967695	0.962065	0.982961	0.971408	0.981162	0.983471	0.986942	0.983183	0.972482	0.982335	0.988136	0.991665	0.995834	0.994713	0.973817	0.99353	0.990596	0.987456
	1.3621	0.994378	0.981514	0.967377	0.96118	0.975708	0.974949	0.978175	0.977686	0.979389	0.980512	0.994264	0.993887	0.991953	0.98552	0.993129	0.979504	0.983353	0.987019	0.98926	0.980704	0.995887	1.01076	0.976575	0.956287	0.96663	0.955508	0.968024	0.988059	0.97888	0.973358	0.968107	0.978643	0.991297	0.974396	0.9875	0.9917	0.978209	0.976794	0.977461	0.972372	0.991744	0.989697	0.983223	0.98527	0.976196	0.986582	0.989093	0.986724
	1.36198	0.983219	0.978528	0.962054	0.980924	0.980356	0.972866	0.976981	0.983572	0.983326	0.987759	0.987086	0.991028	0.988079	0.984935	0.990564	0.97752	0.969835	0.987157	0.990763	0.979102	1.00186	1.00126	0.972539	0.968992	0.964246	0.969265	0.964599	0.978552	0.963804	0.984641	0.982609	0.977011	0.98505	0.981486	0.992553	0.993421	0.995511	0.977883	0.984792	0.977066	0.984648	1	1.00692	0.997773	0.990517	0.987548	0.99362	0.999166
	1.36186	0.981098	0.973272	0.971972	0.967812	0.970856	0.970588	0.981926	0.969359	0.977053	0.986231	0.984671	0.997318	0.983672	0.990171	0.979347	0.974359	0.983967	0.992591	0.994606	0.989077	0.996564	1.00041	0.99393	0.979637	0.967796	0.965899	0.961273	0.976693	0.986681	0.97841	0.977263	0.975075	0.982527	0.986406	0.977109	0.988169	0.96872	0.98315	0.971728	0.975421	0.990387	0.996992	0.98892	0.990766	0.988731	0.987274	0.988834	1.00163
	1.36175	0.987448	0.98386	0.968043	0.963826	0.978865	0.972222	0.968374	0.970582	0.979744	0.986263	0.989951	0.986673	0.986914	0.979356	0.98278	0.979771	0.982872	0.991269	0.98517	0.979381	1.00063	0.998733	0.9818	0.9814	0.977005	0.960072	0.960784	0.976659	0.978827	0.979581	0.977294	0.976812	0.985841	0.994413	0.984313	0.98805	0.987111	0.972286	0.97935	0.976866	0.982396	0.993551	0.993366	0.980482	0.977114	0.983178	0.984061	0.988704
	1.36163	0.977331	0.972535	0.962871	0.964989	0.973424	0.968214	0.976818	0.973375	0.981549	0.985795	0.989467	0.984158	0.986483	0.984698	0.970847	0.980782	0.993678	0.992609	0.986372	0.982153	0.997505	1.00254	0.985005	0.957539	0.97409	0.95806	0.976973	0.975403	0.982556	0.98453	0.96766	0.976601	0.98965	0.998983	0.992531	0.991632	0.987226	0.986354	0.975354	0.97585	0.987197	0.98809	0.988069	0.981729	0.965391	0.982815	0.978718	0.992169
	1.36152	0.972986	0.972202	0.95769	0.964471	0.964889	0.975558	0.97541	0.971649	0.96754	0.988384	0.977846	0.988513	0.982385	0.985849	0.969363	0.976002	0.990149	0.991276	0.988172	0.986451	1.0072	1.01508	0.985722	0.971978	0.986696	0.974879	0.967066	0.973482	0.981683	0.980473	0.979677	0.978461	0.982604	0.980549	0.982148	0.988026	0.974937	0.976168	0.973884	0.963303	0.979351	0.996058	0.981823	0.980661	0.973479	0.986456	0.979486	0.978615
	1.3614	0.981141	0.98161	0.958791	0.957715	0.956384	0.970677	0.962028	0.962422	0.971119	0.977329	0.984739	0.979596	0.993117	0.980417	0.980765	0.975874	0.97756	0.985442	0.979323	0.985975	1.00059	0.987347	0.988506	0.954375	0.962716	0.96875	0.964686	0.975761	0.977305	0.97076	0.968316	0.978881	0.982199	0.983305	0.987444	0.978198	0.98715	0.978408	0.9784	0.965592	0.981711	0.976982	0.990382	0.975588	0.95999	0.977885	0.980372	0.982542
	1.36128	0.984554	0.971341	0.964205	0.955079	0.9607	0.962907	0.979622	0.964758	0.963321	0.976359	0.985352	0.96877	0.974733	0.977336	0.975655	0.978358	0.981266	0.990903	1.0079	0.977595	0.990269	1.0055	0.975117	0.972039	0.970921	0.96777	0.960239	0.969339	0.992301	0.963656	0.963108	0.971436	0.975268	0.985587	0.97619	0.990854	0.972505	0.965952	0.968702	0.965653	0.971511	0.982083	0.984819	0.97761	0.96053	0.965909	0.965417	0.988639
	1.36117	0.983822	0.976248	0.963507	0.964851	0.978562	0.971921	0.971661	0.963146	0.967447	0.976635	0.978558	0.98511	0.975035	0.971635	0.971745	0.964784	0.97869	0.979276	0.98789	0.980302	0.993312	0.991304	0.992823	0.963343	0.970709	0.957667	0.961279	0.97037	0.967825	0.965774	0.966976	0.971436	0.977141	0.977509	0.975756	0.974991	0.982317	0.977582	0.970121	0.966767	0.995171	0.972733	0.995879	0.969452	0.975744	0.975309	0.987966	0.983908
	1.36105	0.997915	0.969133	0.962572	0.971774	0.97613	0.964356	0.969816	0.974254	0.963752	0.972297	0.966022	0.9717	0.97695	0.984004	0.978241	0.969472	0.969442	0.977778	0.988593	0.979485	0.987832	0.985703	0.968411	0.952404	0.9667	0.954621	0.970957	0.965585	0.974899	0.967589	0.971693	0.961519	0.976897	0.983534	0.975309	0.975899	0.971161	0.975048	0.959495	0.954721	0.974521	0.99524	0.986555	0.984539	0.964768	0.975049	0.989267	0.986453
	1.36093	0.991369	0.969797	0.979026	0.970788	0.969552	0.975225	0.980093	0.963323	0.975509	0.976231	0.97921	0.98016	0.975957	0.979474	0.968728	0.972025	0.963816	0.978875	0.97812	0.969481	0.985888	0.982456	0.969121	0.973684	0.961499	0.961234	0.967075	0.957716	0.959459	0.969487	0.960248	0.97422	0.969744	0.979531	0.965517	0.98051	0.969821	0.96916	0.963067	0.961743	0.974833	0.986227	0.990646	0.98268	0.966801	0.98434	0.988568	0.988164
	1.36082	0.980576	0.987399	0.976937	0.9724	0.971319	0.981284	0.975768	0.969334	0.97448	0.975353	0.98066	0.990599	0.981745	0.973924	0.981346	0.968932	0.976846	0.974455	0.973159	0.971317	0.984114	0.989428	0.965376	0.964214	0.950464	0.964524	0.954111	0.969319	0.974701	0.970374	0.96129	0.965437	0.974046	0.972603	0.973584	0.982513	0.965764	0.967151	0.973637	0.965478	0.981975	0.988527	0.996452	0.98009	0.973314	0.980985	0.987063	0.98599
	1.3607	0.986796	0.98291	0.965973	0.968098	0.976057	0.973814	0.985696	0.97618	0.977846	0.993822	0.982759	0.984639	0.988918	0.977943	0.967628	0.972892	0.983625	0.979528	0.984686	0.963463	1.00106	0.9911	0.976785	0.969623	0.969269	0.964783	0.968264	0.970956	0.973503	0.962803	0.963451	0.978333	0.972734	0.977719	0.993561	0.988449	0.973684	0.970851	0.980524	0.976884	0.97512	0.976389	0.990566	0.985621	0.977699	0.988678	0.986153	0.995459
	1.36059	0.998811	0.983485	0.973609	0.979082	0.970061	0.992588	0.982073	0.969502	0.981961	0.985637	0.981384	0.983308	0.993031	0.990166	0.979523	0.975474	0.98252	0.985899	0.981756	0.978123	0.991614	0.998948	0.966181	0.961207	0.976721	0.961402	0.962565	0.969156	0.972348	0.964268	0.962692	0.973006	0.974878	0.983723	0.974442	0.979447	0.985283	0.980303	0.972155	0.976632	0.993265	1	0.992964	0.984947	0.976631	0.982181	0.983178	0.988976
	1.36047	0.996069	0.974233	0.970497	0.982345	0.982249	0.980928	0.984179	0.977297	0.974065	0.979037	0.980921	0.984281	0.9847	0.994785	0.977698	0.972939	0.978662	0.98965	0.979886	0.978553	0.994885	0.989318	0.974947	0.964904	0.973963	0.96687	0.96164	0.970405	0.97883	0.969027	0.968727	0.985521	0.982461	0.983597	0.987126	0.98391	0.985688	0.982025	0.977912	0.970238	0.986298	0.988621	0.981227	0.978909	0.979148	0.976081	1	0.992887
	1.36035	0.979305	0.980528	0.976349	0.974726	0.97504	0.97098	0.979816	0.977181	0.979421	0.990687	0.981328	0.986003	0.992392	0.990705	0.979908	0.982471	0.98158	0.989215	0.983937	0.980009	0.990277	1	0.985036	0.97277	0.970164	0.955811	0.966266	0.96716	0.97606	0.967927	0.978068	0.984135	0.991824	0.986227	0.983987	0.996833	0.97102	0.980675	0.978831	0.968742	0.996934	1.00686	0.997819	0.975317	0.982122	0.981138	0.98643	1.00265
	1.36024	0.983249	0.998347	0.988382	0.984729	0.972447	0.978653	0.977412	0.984848	0.981859	0.985852	0.982909	0.988016	0.986714	0.993582	0.981792	0.983569	0.990059	0.996008	0.991525	0.975155	0.989219	1.00199	0.977981	0.958314	0.974492	0.967453	0.972337	0.97051	0.98089	0.986429	0.974261	0.979637	0.979535	0.987948	0.978762	0.994631	0.986291	0.978471	0.971157	0.984804	0.977077	0.990287	0.997292	0.990039	0.9793	0.980054	1.00094	0.996354
	1.36012	0.984379	0.986344	0.966575	0.968313	0.981727	0.974551	0.98117	0.979587	0.978558	0.977164	0.983333	0.994685	0.98912	0.983423	0.984379	0.97955	0.992562	0.983784	0.989803	0.990993	1	0.997727	0.98332	0.965827	0.978221	0.96733	0.963875	0.974474	0.981787	0.976553	0.974412	0.984214	0.99225	0.991074	0.97985	0.982725	0.977884	0.989119	0.986766	0.975352	0.97492	0.991076	0.998561	0.988424	0.969962	0.981344	0.990586	0.991329
	1.36001	0.994069	0.978242	0.976977	0.974045	0.970338	0.979491	0.981953	0.973557	0.987292	0.981807	0.985883	0.98839	0.994399	0.991629	0.977413	0.979495	0.989207	0.996393	0.985348	0.985511	1.00243	0.999032	0.992966	0.981077	0.971213	0.978664	0.975751	0.971567	0.985842	0.977541	0.97395	0.98555	0.982316	0.97934	0.989486	0.986825	0.984491	0.977357	0.985237	0.976689	0.987016	1.00097	0.999165	0.987302	0.973212	0.981373	0.985663	0.985322
	1.35989	0.985528	0.978592	0.971113	0.973732	0.976956	0.984966	0.984146	0.974747	0.985461	0.980146	0.982601	0.990069	0.9897	0.975137	0.975685	0.980859	0.984929	0.992194	0.999023	0.98427	1.01182	1.00386	0.996101	0.97324	0.984454	0.967893	0.967013	0.986017	0.984541	0.972742	0.97157	0.978333	0.991606	0.989074	0.995628	0.992857	0.978548	0.96876	0.97911	0.987546	0.980207	0.991255	1.00221	0.981303	0.967284	0.977398	0.984362	0.982186
	1.35977	0.986305	0.977877	0.976957	0.978268	0.964984	0.972517	0.973834	0.96815	0.981978	0.983864	0.982766	0.995851	0.995473	0.992924	0.973585	0.976554	0.978641	0.983237	0.985163	0.976886	0.996815	0.99901	0.984357	0.977926	0.972058	0.975536	0.973935	0.981566	0.98293	0.979683	0.973511	0.980431	0.996416	0.981878	0.993696	0.981487	0.978204	0.978558	0.990216	0.979016	0.986361	0.994028	0.996033	0.980926	0.968164	0.976423	0.973127	0.98906
	1.35966	0.972424	0.967388	0.9715	0.966376	0.970809	0.974909	0.973165	0.969485	0.97693	0.970941	0.982963	0.989488	0.986366	0.985644	0.984116	0.984474	0.981797	0.996254	0.992012	0.987185	0.994579	1.00398	0.975475	0.968606	0.968737	0.969374	0.976896	0.971398	0.975859	0.979167	0.976176	0.985464	0.989825	0.980005	0.98605	0.986004	0.969821	0.983035	0.983793	0.977092	0.9834	0.998333	0.9919	0.982576	0.976026	0.977789	0.986612	0.98513
	1.35954	0.962172	0.969679	0.969918	0.956942	0.971477	0.97058	0.97988	0.967471	0.965986	0.986628	0.98894	0.981038	0.97547	0.990699	0.980346	0.980995	0.994425	0.990232	0.980387	0.978723	0.997766	1.00234	0.986868	0.968763	0.976596	0.962441	0.976305	0.979122	0.982989	0.975283	0.978323	0.979974	0.977916	0.984296	0.987831	0.991453	0.976524	0.982042	0.984987	0.969451	0.990674	0.993282	0.997079	0.976889	0.968706	0.977164	0.974145	0.990302
	1.35943	0.978915	0.962014	0.956989	0.957427	0.967923	0.975189	0.968725	0.962225	0.974518	0.976317	0.985132	0.982888	0.991093	0.991278	0.979896	0.985081	0.990643	0.99454	0.994734	0.973015	0.991949	1.00465	0.975678	0.96796	0.984972	0.966499	0.97064	0.976759	0.972099	0.984637	0.975762	0.977764	0.984482	0.984201	0.981547	0.981487	0.98091	0.979442	0.961353	0.980308	0.977615	0.988678	1.00244	0.976661	0.963748	0.969653	0.975452	0.982152
	1.35931	0.981963	0.958889	0.957394	0.93945	0.954777	0.950794	0.971983	0.962683	0.968518	0.97344	0.977097	0.982532	0.981951	0.976034	0.975541	0.966767	0.981766	0.987051	0.987348	0.978643	0.991781	1.00953	0.973486	0.959123	0.981034	0.96159	0.96021	0.977424	0.97953	0.971834	0.974289	0.991247	0.990206	0.98695	0.979907	0.991656	0.972024	0.975631	0.981057	0.969403	0.967468	0.980828	0.9826	0.97675	0.963403	0.970801	0.974871	0.979268
	1.35919	0.976761	0.961399	0.958566	0.955717	0.956069	0.9583	0.963533	0.969345	0.968734	0.971313	0.979698	0.979937	0.982018	0.986709	0.966757	0.981381	0.980616	0.985962	0.979611	0.974576	0.989099	0.99082	0.987635	0.981308	0.982847	0.96295	0.963149	0.973667	0.973765	0.97275	0.979552	0.974455	0.983148	0.988587	0.980458	0.986055	0.982072	0.9662	0.968463	0.967104	0.974838	0.979839	0.991835	0.96377	0.962886	0.964822	0.978409	0.988613
	1.35908	0.979924	0.964181	0.961826	0.957601	0.957389	0.951181	0.967447	0.957424	0.955846	0.968955	0.968093	0.979151	0.989709	0.993966	0.976474	0.972198	0.985846	0.987074	0.981477	0.974819	1.0017	0.992172	0.982101	0.97619	0.966372	0.965128	0.964518	0.970607	0.976206	0.970807	0.968867	0.971541	0.983935	0.977168	0.977539	0.977702	0.972393	0.958297	0.958236	0.969855	0.976636	0.988126	0.987704	0.9793	0.967491	0.973501	0.984881	0.985163
	1.35896	0.992274	0.967947	0.951768	0.954788	0.958593	0.950677	0.955431	0.954509	0.972834	0.964386	0.963164	0.9703	0.972056	0.981345	0.968004	0.968509	0.973011	0.991187	0.978149	0.975045	0.999269	0.985602	0.983353	0.954527	0.964994	0.953519	0.966591	0.962565	0.967784	0.963697	0.970395	0.96577	0.969782	0.974599	0.97519	0.967204	0.977522	0.967798	0.961992	0.956774	0.976387	0.979406	0.976979	0.970708	0.957861	0.968502	0.969843	0.990957
	1.35885	0.994857	0.981634	0.965353	0.950627	0.962063	0.958091	0.960313	0.950013	0.962972	0.970708	0.956651	0.978145	0.969517	0.971306	0.963202	0.968996	0.969635	0.974101	0.968325	0.973525	0.994209	1.00032	0.976807	0.962124	0.968208	0.950637	0.965441	0.964688	0.97313	0.955215	0.96185	0.974359	0.977966	0.973051	0.972079	0.968134	0.960944	0.965753	0.960855	0.957648	0.977669	0.977608	0.984712	0.979785	0.969251	0.972368	0.980458	0.982849
	1.35873	0.971742	0.985659	0.967697	0.965197	0.963556	0.967693	0.968772	0.965023	0.959289	0.973711	0.962812	0.964333	0.966129	0.974907	0.95796	0.969067	0.959754	0.975677	0.968718	0.972468	0.976442	0.98806	0.970055	0.964005	0.949503	0.961159	0.956341	0.964053	0.977533	0.960526	0.963235	0.967207	0.971273	0.966964	0.964648	0.970767	0.963284	0.955639	0.970992	0.960556	0.961209	0.977133	0.98345	0.974821	0.965242	0.960182	0.982431	0.994031
	1.35862	0.990143	0.981722	0.964987	0.973629	0.974229	0.979921	0.969521	0.952941	0.961556	0.966	0.964187	0.961196	0.966874	0.973259	0.964112	0.958275	0.961019	0.966411	0.966263	0.970731	0.981118	0.973746	0.959952	0.949876	0.951827	0.946411	0.950892	0.952926	0.961091	0.949029	0.959332	0.96771	0.963727	0.963297	0.961604	0.964903	0.962106	0.971244	0.95066	0.953807	0.967626	0.987749	0.99063	0.973469	0.96396	0.98524	0.985234	0.988886
	1.3585	1.00134	0.969979	0.96111	0.977772	0.974764	0.970852	0.964148	0.966128	0.968183	0.975989	0.969818	0.97604	0.976143	0.961807	0.957253	0.957442	0.962588	0.966396	0.967803	0.961548	0.978432	0.984321	0.969262	0.944017	0.959816	0.955282	0.951722	0.954203	0.960341	0.956274	0.960373	0.965683	0.955564	0.971037	0.970617	0.975525	0.964419	0.960565	0.964456	0.970919	0.980699	0.979739	1.0014	0.981244	0.968577	0.989619	0.991554	0.984977
	1.35838	0.987065	0.992138	0.97174	0.963971	0.972235	0.975796	0.972331	0.964008	0.968897	0.973905	0.970202	0.979471	0.979704	0.981648	0.960973	0.968067	0.972204	0.977122	0.974201	0.971633	0.972543	0.985999	0.961456	0.961199	0.953579	0.937459	0.946299	0.960743	0.963471	0.9539	0.959284	0.962934	0.969317	0.966857	0.968215	0.968984	0.969706	0.96155	0.969377	0.970276	0.980586	0.991292	0.989014	0.995906	0.97943	0.978492	0.986972	0.996441
	1.35827	0.994074	0.971928	0.974508	0.973125	0.981416	0.985692	0.97395	0.975214	0.973339	0.977384	0.980079	0.987475	0.978025	0.968327	0.966619	0.960497	0.97994	0.971917	0.970629	0.973935	0.982067	0.990988	0.965875	0.970235	0.963212	0.944685	0.954557	0.966709	0.968065	0.97021	0.961561	0.956437	0.968149	0.975319	0.976316	0.977356	0.973758	0.972756	0.957903	0.969276	0.973574	0.993181	0.987524	0.98265	0.978167	0.984782	0.993303	1.00374
	1.35815	0.992761	0.981782	0.979128	0.980262	0.971042	0.980329	0.98652	0.975292	0.974796	0.984222	0.977697	0.977461	0.988649	0.981322	0.970504	0.973592	0.976739	0.9828	0.973593	0.970282	0.990277	1	0.980892	0.958333	0.949886	0.953496	0.957828	0.978091	0.975436	0.967281	0.969871	0.96806	0.980037	0.978213	0.993207	0.982595	0.988332	0.978261	0.974172	0.97801	0.983235	0.994961	0.997863	0.995438	0.978612	0.988988	0.994664	0.998237
	1.35804	0.991056	0.978422	0.98068	0.976244	0.973825	0.965819	0.982824	0.976861	0.977812	0.991183	0.98763	0.992088	0.989274	0.983735	0.970815	0.983313	0.98802	0.989	0.997667	0.976166	0.997971	0.987961	0.980787	0.962201	0.962841	0.957379	0.953656	0.96722	0.96699	0.973114	0.98737	0.975235	0.984575	0.97913	0.983244	0.98457	0.979299	0.991733	0.982795	0.986447	0.97818	0.991384	0.993898	0.990462	0.978648	0.989193	0.99588	0.997971
	1.35792	0.996335	0.984172	0.973451	0.969371	0.983037	0.971933	0.980028	0.976911	0.982573	0.980116	0.987363	0.98794	0.998035	0.984935	0.984748	0.976943	0.977418	0.983481	0.984606	0.988984	1.00149	0.995623	0.975777	0.971878	0.966875	0.958364	0.975049	0.97632	0.982934	0.970052	0.97232	0.974068	0.981396	0.986298	0.993792	0.996208	0.982591	0.976864	0.985336	0.975974	0.984579	0.996648	1.00162	0.991324	0.988421	0.99016	0.998567	0.989396
	1.35781	0.991812	0.983524	0.975128	0.977602	0.976439	0.988708	0.982622	0.978405	0.979667	0.984388	0.980169	0.990647	0.98857	0.986039	0.972418	0.979483	0.976526	0.99449	0.994734	0.993452	1.0039	0.992041	0.983467	0.963671	0.982841	0.963396	0.982528	0.973086	0.981141	0.976648	0.973955	0.977429	0.993205	0.99169	0.986462	0.986842	0.989846	0.985448	0.97681	0.973782	0.987463	0.996647	1.00117	0.994464	0.978676	0.987004	0.995148	0.995813
	1.35769	0.984953	0.969617	0.973476	0.982958	0.973397	0.974414	0.982719	0.97255	0.982752	0.97911	0.9866	0.986404	0.982538	0.996088	0.984278	0.984667	0.987396	0.996849	0.989218	0.984783	1.00234	1.00517	0.983537	0.977887	0.976039	0.953313	0.964907	0.977126	0.985565	0.985793	0.986351	0.981091	0.994688	0.98722	0.985191	0.984379	0.979771	0.980146	0.983782	0.984583	0.995894	0.998612	0.987025	0.979208	0.98058	0.982703	0.985741	0.991742
	1.35758	0.989592	0.986748	0.978204	0.969028	0.983678	0.984679	0.980281	0.9659	0.981543	0.988131	0.981913	0.989811	0.989418	0.991195	0.977643	0.985135	0.989759	0.990834	0.996044	0.987299	0.998616	1.00395	0.986197	0.976119	0.97009	0.972104	0.979068	0.992359	0.974561	0.974661	0.985389	0.99262	0.987389	0.984748	0.993192	0.996737	1.00061	0.982611	0.988663	0.981698	0.990562	0.999383	0.991398	0.999245	0.96967	0.988952	0.999015	0.993482
	1.35746	0.987926	0.980418	0.976091	0.970064	0.981988	0.983502	0.983224	0.976067	0.98413	0.989775	0.983871	0.983458	0.989659	0.975649	0.981977	0.992647	0.981932	0.993051	0.977589	0.980799	1	0.992279	0.981969	0.974449	0.986507	0.976726	0.981376	0.975337	0.986656	0.982741	0.979379	0.984489	0.994522	0.992632	0.989353	0.988964	0.981876	0.991366	0.982181	0.977744	0.995441	0.998936	1.00099	0.98705	0.977699	0.978576	0.995856	0.995311
	1.35735	0.990604	0.982163	0.973453	0.975368	0.965131	0.978321	0.972841	0.968203	0.978217	0.987139	0.984256	0.989007	0.990145	0.9911	0.990032	0.990138	0.977563	0.996787	0.988499	0.983382	0.993748	1.00597	0.975078	0.976721	0.973434	0.977725	0.971386	0.973827	0.973326	0.980275	0.973589	0.985262	0.990925	0.996737	1.00475	0.997398	0.988749	0.978274	0.987559	0.977773	0.983857	1.00087	1.0111	0.993655	0.96899	0.980824	0.995127	0.99896
	1.35723	0.990217	0.986355	0.975717	0.967359	0.980363	0.979109	0.981117	0.973129	0.97893	0.986989	0.985441	0.990474	0.993726	0.991272	0.984113	0.976259	0.978591	0.993789	0.985746	0.985279	1.00143	1.01234	0.994956	0.969253	0.966683	0.974438	0.974541	0.971649	0.985275	0.969342	0.977289	0.984925	0.990138	0.973832	0.98926	0.977027	0.975568	0.985465	0.97588	0.982054	0.987213	1.00647	1.00846	0.978273	0.978856	0.976444	0.995978	0.996167
	1.35711	0.988565	0.975917	0.97846	0.975365	0.977907	0.971803	0.979486	0.967785	0.975748	0.983379	0.983789	0.988179	0.987631	0.982712	0.987847	0.977794	0.998105	0.994467	0.988898	0.982252	0.996378	1.00771	0.96347	0.975834	0.964912	0.966966	0.973444	0.984981	0.982794	0.970595	0.984742	0.978789	0.986871	0.988156	0.988653	0.981366	0.976503	0.969922	0.967369	0.978221	0.988682	0.99156	1	0.984668	0.977347	0.986245	0.989142	0.985199
	1.357	0.986164	0.968547	0.965424	0.975599	0.985072	0.972774	0.980333	0.959789	0.982988	0.982382	0.981895	0.989825	0.988827	0.996866	0.984964	0.976693	0.983413	0.989062	0.993031	0.984668	1.00139	1.00534	0.989986	0.972262	0.979875	0.959089	0.976673	0.985314	0.979626	0.983228	0.977467	0.981856	0.987038	0.983046	0.988814	0.995736	0.971439	0.977871	0.982622	0.974591	0.984942	0.991405	0.995101	0.975159	0.975274	0.983748	0.983446	0.996074
	1.35688	0.982694	0.976714	0.958026	0.975906	0.971644	0.982806	0.982957	0.976667	0.974132	0.98733	0.980973	0.99057	0.982685	0.985459	0.978477	0.985823	0.986526	0.993457	0.994805	0.985177	0.991988	0.998537	0.981272	0.970395	0.967623	0.972826	0.972706	0.981772	0.98243	0.972439	0.969853	0.984515	0.987301	0.991709	0.986998	0.980867	0.977679	0.978367	0.979798	0.980136	0.990967	0.989107	0.998886	0.99231	0.973806	0.989639	0.983897	0.991046
	1.35677	0.978795	0.973724	0.971863	0.970852	0.965062	0.966783	0.982329	0.975114	0.974548	0.974526	0.985981	0.991525	0.990605	0.987039	0.976407	0.98512	0.978517	0.992964	0.995843	0.977955	0.995712	0.99828	0.978381	0.959927	0.960838	0.968283	0.974262	0.974421	0.983379	0.983626	0.972112	0.985412	0.986792	0.987429	0.987654	0.997476	0.981626	0.992637	0.972488	0.97325	0.98887	1	0.990875	0.983126	0.968717	0.976397	0.990606	0.987794
	1.35665	0.979874	0.968552	0.960453	0.963108	0.9706	0.968272	0.972017	0.970448	0.973358	0.977691	0.989535	0.98903	0.985237	0.985809	0.981792	0.976993	0.987346	0.986304	0.985985	0.98362	1.00452	0.994961	0.98781	0.969184	0.962439	0.971283	0.982339	0.971952	0.986828	0.97788	0.974644	0.989575	0.986936	0.988178	0.984131	0.982963	0.975116	0.988475	0.97561	0.973421	0.984487	0.99687	0.993776	0.995434	0.960149	0.980321	0.987794	0.986888
	1.35654	0.974754	0.968097	0.960535	0.972046	0.963736	0.973761	0.974151	0.959333	0.984748	0.984303	0.977618	0.986737	0.993728	0.982558	0.969021	0.971871	0.981228	0.995964	0.980612	0.986081	1.00044	0.992751	0.988218	0.966279	0.975011	0.966899	0.968209	0.97461	0.976406	0.971743	0.978185	0.978938	0.981917	0.988213	0.988438	0.980986	0.982262	0.974437	0.976495	0.978811	0.982211	0.996323	0.986286	0.990617	0.968096	0.980737	0.980315	0.977025
	1.35642	0.968677	0.962619	0.953042	0.957451	0.95895	0.972482	0.978371	0.974349	0.972338	0.984495	0.983139	0.973725	0.989871	0.98464	0.977417	0.97808	0.983863	0.98799	0.987673	0.989139	1.00525	1.00147	0.986306	0.970421	0.966253	0.967187	0.968879	0.973428	0.974813	0.974564	0.972908	0.975532	0.990448	0.987375	0.983549	0.989238	0.972381	0.977394	0.965749	0.965742	0.984257	0.994015	0.995271	0.982637	0.969697	0.978747	0.972125	0.976425
	1.35631	0.965268	0.951705	0.954596	0.957843	0.945857	0.964594	0.967933	0.966089	0.971963	0.974483	0.98072	0.987062	0.98378	0.988526	0.978706	0.976437	0.978892	0.989356	0.98327	0.990606	0.995081	0.999127	0.976036	0.974861	0.960364	0.963886	0.974081	0.977209	0.980777	0.980412	0.971156	0.970429	0.996205	0.98942	0.978	0.9871	0.983998	0.972956	0.965449	0.977773	0.977254	0.989657	0.99586	0.97058	0.967882	0.980075	0.98072	0.973841
	1.35619	0.969598	0.946188	0.955842	0.953355	0.957243	0.961808	0.96349	0.960825	0.972373	0.980581	0.974144	0.982929	0.979473	0.983096	0.976642	0.986594	0.986772	0.987339	0.985104	0.985823	0.996793	0.984438	0.987237	0.972836	0.982342	0.962556	0.970657	0.971112	0.96975	0.976979	0.97866	0.97836	0.980094	0.981765	0.985234	0.983501	0.970611	0.970811	0.969799	0.98056	0.981628	0.987652	0.983773	0.96896	0.960891	0.96353	0.967134	0.972214
	1.35608	0.969877	0.942032	0.942278	0.94899	0.946498	0.961489	0.964697	0.96125	0.967137	0.971168	0.987584	0.978212	0.980162	0.983362	0.977425	0.983747	0.974852	0.983267	0.981128	0.976387	0.995185	0.996548	0.981954	0.972828	0.965848	0.967643	0.964345	0.97954	0.976855	0.972915	0.972769	0.969739	0.986528	0.975872	0.987833	0.973633	0.965823	0.97233	0.961045	0.967181	0.984261	0.990745	0.977922	0.967157	0.964226	0.96113	0.966983	0.980424
	1.35596	0.975615	0.942948	0.943154	0.951034	0.944455	0.951956	0.9571	0.958156	0.954667	0.971793	0.977879	0.973049	0.990176	0.988774	0.972443	0.973269	0.978026	0.987915	0.983538	0.979867	0.996772	0.995882	0.985852	0.968318	0.962244	0.965663	0.963179	0.969214	0.972832	0.969686	0.971167	0.969042	0.980891	0.984388	0.978943	0.984731	0.967563	0.956273	0.966893	0.972822	0.974556	0.979187	0.992065	0.968303	0.9555	0.964346	0.964496	0.957568
	1.35585	0.961446	0.956322	0.949965	0.944846	0.953619	0.948128	0.964531	0.950826	0.952113	0.960449	0.97536	0.981811	0.971041	0.98321	0.972062	0.971561	0.981729	0.977797	0.983733	0.986415	0.993811	1.00685	0.968664	0.961115	0.968208	0.970006	0.962683	0.971857	0.979668	0.967973	0.974589	0.971356	0.981445	0.982533	0.982041	0.979496	0.979559	0.970991	0.976539	0.959324	0.981429	0.981752	0.977505	0.963745	0.948604	0.962783	0.976338	0.967684
	1.35573	0.975396	0.963119	0.950295	0.942277	0.949497	0.948074	0.947996	0.948909	0.951024	0.955767	0.96415	0.963438	0.974348	0.979432	0.969215	0.966411	0.966076	0.984615	0.97141	0.975059	0.999112	0.988561	0.978006	0.96434	0.959385	0.969063	0.966914	0.96785	0.977059	0.965749	0.973535	0.982002	0.980312	0.973993	0.98651	0.972216	0.9757	0.969583	0.961149	0.96459	0.967748	0.974616	0.972564	0.960656	0.952495	0.963869	0.966423	0.963592
	1.35562	0.974903	0.953763	0.949518	0.952987	0.956379	0.948529	0.945208	0.939538	0.95428	0.958801	0.962223	0.959191	0.963335	0.970758	0.9674	0.971841	0.963981	0.971454	0.979306	0.96984	0.982827	0.986747	0.969428	0.977761	0.966305	0.962325	0.961128	0.972877	0.970918	0.96318	0.9683	0.973265	0.968434	0.974208	0.976071	0.971264	0.961327	0.952917	0.957447	0.950738	0.964563	0.967393	0.972641	0.957261	0.954779	0.955214	0.97491	0.962734
	1.3555	0.987161	0.977267	0.959341	0.952322	0.947869	0.962447	0.956066	0.950615	0.942578	0.958497	0.953222	0.959613	0.975122	0.962457	0.956531	0.960634	0.964134	0.977742	0.972699	0.967039	0.986626	0.993489	0.965409	0.965142	0.958644	0.951674	0.96078	0.973759	0.971363	0.954086	0.961158	0.973366	0.971057	0.96674	0.979286	0.973308	0.958344	0.958064	0.95189	0.955803	0.963342	0.970779	0.9761	0.957212	0.949355	0.956285	0.969244	0.977567
	1.35539	0.985006	0.971982	0.962646	0.965163	0.968357	0.955012	0.963943	0.951534	0.949025	0.957879	0.954496	0.96259	0.962808	0.970437	0.956108	0.955698	0.968798	0.965256	0.966424	0.966957	0.992016	0.993391	0.965193	0.953601	0.94867	0.949352	0.95638	0.955429	0.971562	0.953935	0.966601	0.965075	0.958011	0.97405	0.957494	0.962791	0.952211	0.958569	0.94946	0.945173	0.965652	0.967003	0.966488	0.964485	0.955719	0.961691	0.977138	0.975331
	1.35527	0.979198	0.977684	0.968683	0.957595	0.965677	0.951873	0.961723	0.946655	0.963344	0.964789	0.963209	0.955301	0.957522	0.969125	0.957284	0.951241	0.953378	0.972591	0.967291	0.965592	0.976898	0.976394	0.970394	0.95073	0.958425	0.947384	0.948729	0.957512	0.950491	0.947446	0.954807	0.964084	0.963696	0.953871	0.964367	0.96911	0.962009	0.956431	0.957024	0.94855	0.965965	0.969906	0.988795	0.96931	0.957468	0.969948	0.981941	0.988364
	1.35516	0.993016	0.977766	0.974208	0.974694	0.96896	0.967101	0.964174	0.944002	0.967575	0.965476	0.964389	0.958877	0.951367	0.959106	0.952124	0.945646	0.96336	0.969686	0.956569	0.960311	0.97692	0.977032	0.962653	0.944486	0.948964	0.944732	0.944623	0.953697	0.958415	0.954942	0.959957	0.95093	0.958441	0.966694	0.956433	0.954163	0.951181	0.957101	0.943511	0.955359	0.967096	0.972929	0.979873	0.972093	0.963829	0.976329	0.987749	0.987794
	1.35504	0.985321	0.980852	0.980661	0.969942	0.972083	0.966417	0.973855	0.970762	0.96626	0.964114	0.973	0.957954	0.975567	0.964584	0.94632	0.949881	0.95472	0.963016	0.954882	0.956369	0.969757	0.98128	0.951306	0.930766	0.945145	0.951984	0.943905	0.945086	0.95206	0.95795	0.949946	0.954223	0.95935	0.95818	0.956797	0.963427	0.963192	0.95357	0.951824	0.959708	0.972045	0.979079	0.982818	0.977647	0.968656	0.981302	0.98619	0.980782
	1.35493	0.991399	0.974919	0.978322	0.978982	0.975146	0.978441	0.980507	0.960797	0.971065	0.973145	0.971044	0.966012	0.972198	0.966997	0.956569	0.945936	0.963712	0.974464	0.956206	0.961858	0.965278	0.97233	0.949345	0.954992	0.936414	0.932972	0.946022	0.947469	0.957799	0.946207	0.954505	0.952482	0.95983	0.95321	0.96477	0.964082	0.968379	0.951897	0.95563	0.964142	0.983454	0.990406	0.989707	0.978723	0.976772	0.9874	0.990179	0.997939
	1.35481	0.994925	0.981491	0.973903	0.978172	0.975736	0.977587	0.976874	0.970199	0.977322	0.969684	0.974322	0.977575	0.979299	0.97354	0.96481	0.960468	0.96325	0.965261	0.967282	0.953806	0.976409	0.969669	0.950478	0.943833	0.952045	0.954612	0.953169	0.962293	0.947553	0.950298	0.940747	0.955094	0.965069	0.962329	0.970702	0.977873	0.96656	0.971007	0.956147	0.960716	0.98109	0.995034	0.996409	0.989474	0.977782	0.981278	0.987861	0.993321
	1.3547	0.99873	0.969142	0.97362	0.97168	0.97434	0.97239	0.974204	0.974268	0.978334	0.989348	0.975097	0.984455	0.986954	0.976077	0.964003	0.968555	0.968508	0.9768	0.970139	0.967463	0.98051	0.979585	0.962312	0.949791	0.947897	0.942782	0.945486	0.947766	0.968635	0.960857	0.946719	0.966555	0.968917	0.975301	0.98089	0.97066	0.967388	0.985342	0.968386	0.961961	0.983269	0.992665	0.99143	0.987365	0.980793	0.984355	0.999113	0.994015
	1.35458	1.00102	0.969013	0.975204	0.968867	0.977978	0.977449	0.988856	0.972557	0.978325	0.975683	0.984357	0.984353	0.98034	0.980538	0.986551	0.976493	0.971198	0.976106	0.974701	0.96584	0.979714	0.979332	0.972274	0.950338	0.965918	0.947166	0.948355	0.957357	0.965692	0.954579	0.96674	0.960285	0.974944	0.969336	0.976734	0.982557	0.972852	0.974117	0.979426	0.970848	0.987757	0.988497	0.997791	0.983863	0.983668	0.979503	0.985507	0.996967
	1.35447	0.998786	0.987855	0.979853	0.968931	0.979004	0.98482	0.9814	0.975217	0.984905	0.992221	0.981689	0.97883	0.988546	0.98162	0.975826	0.974191	0.983413	0.987538	0.985665	0.976458	0.984523	0.988132	0.975336	0.954195	0.95835	0.958825	0.95874	0.969349	0.966667	0.96815	0.965733	0.970401	0.986031	0.986637	0.980539	0.982741	0.971968	0.979357	0.971509	0.981014	0.990254	0.998312	1.00465	0.984505	0.981214	0.984297	0.996154	0.994352
	1.35435	0.989691	0.978841	0.976467	0.987176	0.979243	0.983401	0.987042	0.983365	0.980492	0.978392	0.997174	0.982514	0.987186	0.98274	0.97411	0.9769	0.975923	0.984801	0.976318	0.974571	0.987829	0.993509	0.969489	0.964358	0.976181	0.963128	0.964371	0.970092	0.963729	0.970227	0.964228	0.970661	0.978873	0.988848	0.981699	0.983666	0.981117	0.977646	0.974893	0.971505	0.987816	0.991426	1.01166	0.985294	0.977654	0.981501	1.00426	1.00514
	1.35424	0.988544	0.983364	0.97803	0.97898	0.978106	0.979147	0.984231	0.976139	0.985126	0.97333	0.986753	0.990061	0.984318	1.00057	0.974657	0.980931	0.983432	0.987591	0.980469	0.975576	0.989881	1.00453	0.970483	0.9769	0.970755	0.972436	0.964768	0.969194	0.979575	0.978861	0.976916	0.991944	0.983515	0.982642	0.991918	0.989089	0.986949	0.983518	0.989448	0.972777	0.994685	1.0045	0.99978	0.991653	0.984927	0.995212	1.00497	0.998361
	1.35412	0.986924	0.983982	0.982656	0.976255	0.982147	0.98439	0.971909	0.973221	0.985145	0.994691	0.987318	0.977068	0.990261	0.980079	0.982886	0.974602	0.981882	0.985986	0.981326	0.985866	0.992889	1.0014	0.978206	0.964646	0.970493	0.960298	0.972066	0.970848	0.98183	0.976612	0.979511	0.970578	0.990554	0.984451	0.992572	0.976831	0.982368	0.973858	0.988872	0.986837	0.997767	0.999065	0.997811	0.990609	0.984036	0.997004	1.00156	1.0063
	1.35401	0.991692	0.978024	0.973936	0.976602	0.976476	0.986423	0.975393	0.974504	0.977191	0.992655	0.984749	0.986692	0.992283	0.999422	0.983347	0.977226	0.989698	0.990762	0.994256	0.986823	0.995571	1.00435	0.980076	0.974451	0.954682	0.974951	0.968082	0.981079	0.986396	0.976893	0.976363	0.985266	0.988213	0.996875	0.994465	0.990102	0.98476	0.981504	0.981656	0.974429	0.998412	1.00135	1.01332	0.984484	0.98242	0.985307	1.00336	0.999765
	1.35389	0.991303	0.975026	0.974865	0.984855	0.97485	0.974183	0.974331	0.979111	0.987821	0.983036	0.98654	0.980674	0.986298	0.98887	0.991046	0.97721	0.994708	0.99564	0.9894	0.976561	1.00157	1.00035	0.986492	0.979945	0.975741	0.970154	0.966902	0.979583	0.980967	0.980802	0.97335	0.981617	0.994873	0.991485	0.990113	0.988024	0.984549	0.981387	0.979144	0.982483	0.993736	0.998981	1.00046	0.987479	0.994216	0.996768	1.00067	0.994848
	1.35378	0.987976	0.983786	0.976222	0.973039	0.984723	0.976654	0.985263	0.982299	0.983093	0.99161	0.996976	0.986269	0.987516	0.991455	0.986125	0.98133	0.998896	0.99385	0.990751	0.979733	1.0036	1.00255	0.981529	0.975474	0.984142	0.970503	0.973089	0.973739	0.987724	0.986776	0.983888	0.983898	0.98903	0.989464	0.992691	0.992695	0.988088	1.00241	0.978666	0.983307	0.995041	1.00242	0.993539	0.994488	0.978737	0.989174	0.993697	0.999288
	1.35366	0.99818	0.978631	0.959436	0.973863	0.976535	0.981496	0.976688	0.985723	0.984722	0.997254	0.986676	0.97893	0.989471	1.00054	0.984091	0.979231	0.988476	0.997081	0.990991	0.975129	1.00569	1.00648	0.980486	0.976334	0.978764	0.959912	0.972423	0.978656	0.987696	0.979679	0.974594	0.993282	0.996383	0.985198	0.992111	0.986026	0.981728	0.993798	0.989339	0.990493	1.00066	0.99887	1.0008	0.985665	0.983991	0.985692	0.998361	1.0017
	1.35355	0.988483	0.983278	0.969301	0.982073	0.98011	0.974714	0.984654	0.984579	0.98964	0.986891	0.994658	1.00266	0.994588	1.00239	0.971491	0.98639	0.994903	0.998064	0.990685	0.983508	1.00028	0.999239	0.988734	0.987701	0.974166	0.971815	0.965919	0.983764	0.979016	0.97659	0.978362	0.986744	0.991665	0.984761	0.988441	0.994484	0.991197	0.983671	0.975563	0.978237	0.996769	1.00456	1.00858	0.984231	0.977756	0.984203	0.996386	0.999754
	1.35343	0.986845	0.975853	0.970364	0.97551	0.98019	0.983859	0.985659	0.976977	0.976597	0.985661	0.986999	0.991972	0.988484	0.999734	0.988166	0.984937	0.984804	0.992921	0.989702	0.988212	1.00086	1.01799	0.995027	0.970631	0.978479	0.965834	0.972576	0.984095	0.985427	0.985053	0.983427	0.981573	0.983897	0.982183	0.998281	0.997513	0.988537	0.987726	0.981388	0.983215	0.998045	0.999553	1.00342	0.992227	0.981742	0.993483	0.999469	1.00134
	1.35332	0.993866	0.983633	0.968169	0.974175	0.984467	0.982822	0.988753	0.980446	0.977049	0.98799	0.983478	0.996124	0.986595	0.988787	0.992679	0.983585	1.00106	0.995079	1.00377	0.9785	1.00733	1.00615	0.994568	0.974929	0.983886	0.972893	0.982242	0.991836	0.989665	0.982688	0.97816	0.986314	0.994578	0.996922	0.986629	0.992289	0.980007	0.992708	0.982349	0.984986	0.993032	1.00494	1.00234	1.00083	0.989561	0.99628	1.00084	1.00715
	1.3532	0.99253	0.975948	0.961775	0.96894	0.978532	0.991264	0.98522	0.981835	0.976931	0.986356	0.987954	0.983627	0.996264	1.00179	0.968021	0.987013	0.989319	1.00285	0.993515	0.993665	1.00028	1.00309	0.977738	0.975504	0.981862	0.975546	0.983871	0.9865	1.0023	0.980325	0.964929	0.991055	1.0034	0.981647	0.985664	0.991429	0.983712	0.997886	0.986663	0.982456	0.996445	1.00332	0.999729	0.991713	0.974928	0.986985	1.00086	0.9991
	1.35309	0.981756	0.981303	0.976744	0.979817	0.974186	0.972398	0.983079	0.980977	0.981363	0.988654	0.98737	0.986747	0.990808	0.994173	0.987716	0.991172	0.989598	1.01065	0.986141	0.988171	0.999725	1.00189	0.987446	0.965249	0.975012	0.9878	0.973495	0.983768	0.983839	0.977063	0.977331	0.991098	0.989764	0.987789	0.990294	0.988997	0.980473	0.98855	0.985859	0.972393	0.998806	0.998789	0.990828	1.00344	0.971163	0.980367	0.999717	0.998803
	1.35298	0.988827	0.971849	0.979176	0.966604	0.975072	0.978508	0.979264	0.976094	0.975819	0.989425	0.986949	0.991364	0.992987	0.987791	0.981736	0.980209	0.980263	1.00291	0.993613	0.993493	1.00876	1.00299	0.98145	0.979093	0.978648	0.978723	0.982095	0.982233	0.983309	0.976809	0.984626	0.988508	0.987312	1.00156	0.990967	0.985308	0.975776	0.986116	0.990663	0.984589	1.00628	0.995867	1.00432	0.984141	0.970168	0.980047	0.988798	0.993501
	1.35286	0.987449	0.979601	0.971199	0.967983	0.974031	0.973757	0.978847	0.974802	0.986387	0.976667	0.984723	0.989207	0.982965	0.990529	0.984792	0.982771	0.991342	0.996155	0.987354	0.990009	1.01022	0.998147	0.988598	0.979842	0.975298	0.972607	0.979826	0.983744	0.977412	0.985633	0.983937	0.990568	0.99397	0.991784	1.00376	0.982473	0.978531	0.990722	0.984171	0.982085	1.00312	0.990657	0.989553	0.993037	0.973797	0.996927	1.00057	0.997344
	1.35275	0.982654	0.972522	0.967314	0.972204	0.973341	0.970152	0.977247	0.97158	0.975811	0.984803	0.987845	0.989187	0.992124	0.996084	0.992977	0.976678	0.996099	0.996935	0.992826	0.991649	1.01381	1.00362	0.985648	0.97617	0.97773	0.975553	0.979066	0.982886	0.982751	0.974851	0.973913	0.975707	0.98609	0.981791	0.985083	0.987846	0.98868	0.974863	0.975624	0.980311	0.993102	1.00687	0.997998	0.994555	0.979368	0.984007	0.989832	0.995787
	1.35263	0.973668	0.976636	0.960203	0.965502	0.976844	0.97568	0.972481	0.975097	0.976773	0.986179	0.986482	0.984681	0.987548	0.999778	0.969087	0.980721	0.982995	0.995281	0.98469	0.99594	1.00295	1.00664	0.986848	0.980982	0.979301	0.977975	0.967213	0.990594	0.986478	0.983255	0.98097	0.983764	0.997674	0.988782	0.993884	0.994526	0.990708	0.985089	0.969765	0.979381	0.995561	0.992785	1.00634	0.995128	0.984682	0.989941	0.999707	0.98959
	1.35252	0.979403	0.966269	0.961572	0.967227	0.970046	0.969703	0.970129	0.975244	0.979508	0.977265	0.980715	0.984238	0.991353	0.991814	0.977917	0.985502	0.981916	0.99286	0.984131	0.99182	0.994621	1.00602	0.986729	0.975158	0.971649	0.982363	0.965322	0.97254	0.990864	0.98165	0.982898	0.984987	0.987917	0.992174	0.976738	0.989622	0.979548	0.981092	0.978913	0.984234	1.00154	1.00275	0.991683	0.979864	0.975266	0.982931	0.994581	0.980729
	1.3524	0.976796	0.978791	0.956762	0.962264	0.969931	0.973829	0.972244	0.975181	0.985558	0.981679	0.984513	0.982212	0.98653	0.988626	0.98114	0.975157	0.98504	0.99431	0.977212	0.994949	1.00157	0.996797	0.98921	0.970902	0.973163	0.952769	0.97129	0.988762	0.984998	0.980489	0.977594	0.982323	0.98594	0.987423	0.991239	0.985144	0.976634	0.986858	0.979233	0.983585	0.997659	0.989359	0.989718	0.981088	0.977934	0.983818	1.00141	0.99296
	1.35229	0.976981	0.967566	0.965502	0.962995	0.967819	0.983006	0.974703	0.975527	0.97391	0.976604	0.988731	0.989601	0.989093	0.994076	0.978252	0.983455	0.986824	0.992065	0.992376	0.983754	0.999334	1.00122	0.979415	0.976892	0.970449	0.955749	0.972293	0.991145	0.9879	0.975637	0.97911	0.981947	0.988999	0.980179	0.984922	0.992685	0.980155	0.984492	0.970694	0.974587	0.981136	1.00237	0.993399	0.98196	0.988594	0.983875	0.988095	0.983707
	1.35217	0.97621	0.966604	0.960442	0.967694	0.963119	0.968863	0.976342	0.970616	0.974493	0.977758	0.985696	0.985607	0.988704	0.980732	0.976438	0.977225	0.983059	0.999125	0.996556	0.986098	1.00482	1.0027	0.979549	0.975985	0.974379	0.967346	0.969524	0.977734	0.983786	0.976495	0.97851	0.98135	0.984893	0.994451	0.984368	0.98288	0.990513	0.973684	0.980054	0.970918	0.988363	1.00342	1.00456	0.97843	0.966532	0.984604	0.982538	0.986602
	1.35206	0.977368	0.969769	0.957747	0.966567	0.970839	0.964245	0.971638	0.965556	0.98449	0.978785	0.980454	0.976762	0.969804	0.981145	0.978883	0.983057	0.983712	0.994414	0.983416	0.994787	0.996941	1.0012	0.968271	0.962202	0.969377	0.966477	0.970127	0.980179	0.981384	0.976779	0.979408	0.98136	0.986762	0.987827	0.994155	0.976133	0.97879	0.973312	0.965701	0.970765	0.992152	0.993523	1.00451	0.989612	0.970127	0.981361	0.985129	0.985278
	1.35195	0.977374	0.964425	0.960482	0.962435	0.963955	0.964312	0.969956	0.977502	0.969349	0.985546	0.980548	0.982772	0.98222	0.985501	0.977714	0.973661	0.9814	0.990128	0.988434	0.984091	0.996753	1.00208	0.984061	0.976	0.975661	0.96624	0.963813	0.984387	0.978497	0.971846	0.971773	0.982285	0.9831	0.987897	0.985197	0.98021	0.97956	0.976678	0.980342	0.979818	0.976933	0.999801	0.981186	0.975361	0.969508	0.979268	0.981868	0.987313
	1.35183	0.965952	0.969074	0.959619	0.965698	0.96932	0.96132	0.976301	0.963582	0.967127	0.97356	0.979091	0.978917	0.990046	0.977838	0.968045	0.97682	0.986934	0.995555	0.985185	0.98532	0.991046	0.994939	0.983726	0.967883	0.973517	0.963175	0.960499	0.982281	0.976735	0.976838	0.972605	0.980358	0.98977	0.984269	0.979812	0.976984	0.9794	0.968	0.974634	0.981524	0.989669	0.981232	0.990952	0.982436	0.970041	0.977614	0.974809	0.982835
	1.35172	0.966263	0.965244	0.952927	0.961176	0.963485	0.966452	0.965597	0.965166	0.968609	0.970683	0.978171	0.989922	0.982535	0.988611	0.975841	0.986407	0.981507	0.982098	0.978681	0.987623	1.00022	0.99556	0.973657	0.962319	0.973489	0.959323	0.970558	0.972445	0.975874	0.968773	0.970123	0.982152	0.986021	0.976369	0.986649	0.977982	0.967866	0.987355	0.969049	0.968842	0.985807	0.999062	0.98646	0.970072	0.962926	0.976655	0.976137	0.973753
	1.3516	0.970888	0.949225	0.950988	0.948683	0.959315	0.971029	0.966279	0.959199	0.964483	0.971084	0.981882	0.980066	0.975529	0.970641	0.971	0.974567	0.983495	0.985888	0.977444	0.979969	0.999557	0.991614	0.96484	0.971262	0.968361	0.968254	0.96917	0.97729	0.983198	0.979064	0.978373	0.976445	0.983142	0.980558	0.98683	0.982221	0.972366	0.978104	0.971343	0.975233	0.976376	0.985283	0.990897	0.975331	0.969231	0.972904	0.973105	0.971678
	1.35149	0.956511	0.951775	0.943324	0.949693	0.955942	0.971232	0.975502	0.962388	0.963199	0.983604	0.980766	0.975857	0.982496	0.973583	0.97327	0.969425	0.977736	0.981897	0.982759	0.985848	0.988711	1.00339	0.984741	0.965796	0.97765	0.960333	0.964842	0.979111	0.982132	0.970572	0.971619	0.976138	0.985681	0.977389	0.9797	0.974235	0.970122	0.968766	0.966028	0.976226	0.989302	0.98812	0.978556	0.976538	0.964528	0.967042	0.978366	0.972222
	1.35137	0.957573	0.956685	0.955443	0.960686	0.960092	0.960904	0.955946	0.958491	0.970513	0.967582	0.983182	0.971203	0.980706	0.976999	0.98099	0.972948	0.984201	0.984486	0.986259	0.977228	1.00068	0.997849	0.986121	0.969248	0.963485	0.982827	0.963197	0.976399	0.971051	0.979171	0.970095	0.976359	0.980428	0.978556	0.986274	0.981032	0.964414	0.966106	0.97921	0.969008	0.979838	0.990396	0.988933	0.963217	0.954065	0.974903	0.977483	0.981132
	1.35126	0.952107	0.950958	0.944959	0.947238	0.953198	0.955595	0.961163	0.957819	0.966512	0.969526	0.973605	0.96457	0.982306	0.98117	0.975124	0.962996	0.975188	0.980603	0.978865	0.977546	0.994555	0.983542	0.969783	0.961394	0.957757	0.972781	0.970859	0.9676	0.971756	0.969395	0.970626	0.969158	0.980751	0.982254	0.972901	0.988017	0.970977	0.971791	0.972318	0.958711	0.969876	0.978041	0.985112	0.97569	0.960947	0.968449	0.969859	0.973145
	1.35115	0.955252	0.945549	0.947204	0.952481	0.955984	0.955994	0.956942	0.955075	0.968974	0.970872	0.981555	0.976072	0.976161	0.980244	0.969495	0.977187	0.976525	0.986467	0.975803	0.973015	0.996216	0.991865	0.980142	0.970743	0.961891	0.959854	0.956109	0.974895	0.972846	0.964232	0.973675	0.972444	0.985036	0.98395	0.984106	0.981609	0.974111	0.96484	0.970043	0.971859	0.978705	0.983448	0.993302	0.964401	0.953961	0.959721	0.975731	0.970994
	1.35103	0.953192	0.945946	0.946841	0.939207	0.939499	0.957021	0.957539	0.952704	0.959822	0.970675	0.973854	0.973488	0.975921	0.978978	0.971148	0.972008	0.978128	0.987749	0.969392	0.97818	0.991218	0.986222	0.975542	0.966979	0.970832	0.969049	0.965984	0.968511	0.970807	0.968908	0.976371	0.970708	0.989735	0.97568	0.983816	0.978288	0.966684	0.963802	0.964162	0.960157	0.979946	0.979679	0.973773	0.95323	0.960017	0.96623	0.967691	0.961364
	1.35092	0.949511	0.943373	0.936181	0.950684	0.940169	0.949469	0.943025	0.946917	0.951344	0.967316	0.967755	0.969439	0.970588	0.975588	0.968092	0.964887	0.97639	0.983825	0.980109	0.986542	0.978519	0.993621	0.968337	0.971207	0.965692	0.958253	0.967823	0.964786	0.967449	0.970234	0.967091	0.972427	0.978289	0.976413	0.970776	0.978392	0.967716	0.962953	0.967434	0.958255	0.975458	0.982393	0.978872	0.957878	0.957915	0.964908	0.954005	0.958534
	1.3508	0.954401	0.942288	0.935654	0.938696	0.943628	0.941703	0.960081	0.947441	0.955319	0.960342	0.966146	0.961237	0.970477	0.982703	0.971321	0.966806	0.972912	0.975205	0.975701	0.969336	0.988341	0.991177	0.968597	0.970188	0.954611	0.958023	0.955162	0.97229	0.973833	0.975924	0.96695	0.975968	0.97556	0.97428	0.978596	0.961032	0.964865	0.962587	0.968838	0.970978	0.972047	0.980153	0.975106	0.958994	0.939992	0.954825	0.956039	0.966085
	1.35069	0.960032	0.951515	0.936606	0.944198	0.938903	0.94091	0.94594	0.949104	0.953509	0.953514	0.971455	0.969946	0.969234	0.963687	0.958195	0.960292	0.969849	0.97989	0.975292	0.984105	0.982767	0.983188	0.961402	0.9627	0.954331	0.954673	0.952818	0.964557	0.969512	0.965088	0.960763	0.96929	0.97529	0.972518	0.971639	0.970025	0.965161	0.97008	0.965345	0.965764	0.963871	0.965236	0.976002	0.959812	0.940333	0.970422	0.963237	0.958243
	1.35058	0.958323	0.949798	0.93657	0.937346	0.937916	0.939203	0.950888	0.950303	0.952218	0.971866	0.961538	0.967083	0.974936	0.957267	0.968977	0.96519	0.973093	0.979376	0.968975	0.969292	0.981675	0.999044	0.967638	0.961125	0.952639	0.958286	0.955901	0.971574	0.974026	0.964774	0.971341	0.969145	0.97477	0.969789	0.975548	0.969584	0.968649	0.952609	0.957756	0.959148	0.971802	0.972694	0.960456	0.955064	0.95364	0.957261	0.968714	0.966683
	1.35046	0.958998	0.945932	0.936917	0.933746	0.941959	0.930653	0.950839	0.934502	0.954592	0.9557	0.968957	0.966371	0.96638	0.963667	0.973493	0.960387	0.971676	0.978765	0.964974	0.980773	0.993528	0.982872	0.971374	0.952783	0.959361	0.956754	0.960368	0.957531	0.967542	0.951397	0.968572	0.969097	0.963787	0.969515	0.972247	0.971479	0.968733	0.952538	0.957651	0.955885	0.961829	0.969413	0.96399	0.954248	0.938407	0.943665	0.958247	0.966023
	1.35035	0.972361	0.960503	0.937617	0.937777	0.939386	0.936867	0.938341	0.946379	0.944931	0.950307	0.953455	0.950902	0.973788	0.960089	0.949909	0.962377	0.959022	0.981339	0.973456	0.970834	0.984645	0.979612	0.965772	0.965339	0.962728	0.95	0.957924	0.954422	0.969423	0.960861	0.968931	0.96362	0.977208	0.968322	0.969939	0.96734	0.96664	0.956138	0.959313	0.961781	0.961708	0.969841	0.967389	0.956251	0.941383	0.948628	0.961149	0.961796
	1.35023	0.966827	0.955171	0.939313	0.937372	0.944579	0.936486	0.943645	0.93726	0.94115	0.947944	0.963551	0.956992	0.963607	0.964804	0.961348	0.950737	0.960888	0.965424	0.957062	0.968728	0.983303	0.970969	0.9608	0.948801	0.953253	0.947337	0.956206	0.964713	0.960573	0.963134	0.957601	0.962064	0.970678	0.973228	0.969746	0.966156	0.959827	0.954715	0.951028	0.950617	0.961924	0.967997	0.96159	0.958458	0.937925	0.961234	0.956257	0.971628
	1.35012	0.975489	0.959016	0.941766	0.94581	0.940674	0.945287	0.949121	0.937573	0.939164	0.953107	0.957756	0.960352	0.965257	0.957464	0.9535	0.951465	0.964398	0.966258	0.964194	0.969449	0.977491	0.980536	0.958784	0.970124	0.947179	0.945853	0.948977	0.964331	0.964721	0.957307	0.958984	0.970768	0.959863	0.967712	0.965261	0.960754	0.961517	0.948412	0.944745	0.95573	0.964867	0.960731	0.958613	0.949051	0.941519	0.953176	0.960713	0.976912
	1.35	0.987782	0.965621	0.940998	0.954023	0.94506	0.946744	0.944307	0.933215	0.945318	0.954257	0.954373	0.95595	0.963655	0.962402	0.944241	0.947265	0.95321	0.965106	0.960902	0.967709	0.985397	0.984009	0.963669	0.974734	0.95515	0.93904	0.953704	0.958786	0.959272	0.953296	0.955828	0.96422	0.960752	0.957253	0.967097	0.957429	0.952984	0.947426	0.948953	0.949783	0.953466	0.964882	0.960547	0.958148	0.946661	0.950521	0.963771	0.97244
	1.34989	0.971278	0.967609	0.959931	0.947312	0.957436	0.946758	0.939093	0.935689	0.941592	0.945571	0.946098	0.963083	0.949414	0.962751	0.94848	0.955738	0.961966	0.966174	0.969644	0.955307	0.976882	0.967768	0.955696	0.962424	0.944444	0.958714	0.952286	0.959821	0.961976	0.952674	0.954817	0.955572	0.967345	0.965038	0.957697	0.953955	0.956198	0.936002	0.948206	0.953786	0.950668	0.954367	0.966569	0.951538	0.945632	0.970095	0.977502	0.990068
	1.34978	0.988579	0.962052	0.964599	0.955963	0.943093	0.949125	0.947356	0.941855	0.953261	0.944002	0.947701	0.957402	0.948858	0.964286	0.95017	0.938856	0.948969	0.96183	0.959302	0.958514	0.970083	0.970301	0.954792	0.939437	0.946119	0.949612	0.940349	0.947133	0.958937	0.951777	0.954407	0.955951	0.949198	0.959384	0.955573	0.958583	0.952037	0.939567	0.944262	0.95534	0.958183	0.964661	0.967451	0.955692	0.951169	0.975028	0.978733	0.973406
	1.34966	0.983913	0.971225	0.960883	0.947771	0.954405	0.958553	0.947106	0.939146	0.949314	0.95174	0.946088	0.944189	0.966438	0.962106	0.946391	0.947661	0.952029	0.960226	0.952775	0.960323	0.982264	0.974833	0.951033	0.966715	0.954652	0.946287	0.952629	0.941976	0.943095	0.954028	0.951857	0.953259	0.959432	0.960724	0.954369	0.950437	0.958138	0.936713	0.939297	0.943063	0.959629	0.973387	0.972819	0.964304	0.958681	0.971876	0.967495	0.989036
	1.34955	0.99933	0.976242	0.95968	0.971159	0.969875	0.957391	0.949309	0.95787	0.940844	0.948815	0.953135	0.942935	0.9531	0.950566	0.943508	0.934924	0.953215	0.9447	0.962025	0.973785	0.971217	0.964511	0.949706	0.93945	0.941468	0.942837	0.939712	0.958519	0.952067	0.943709	0.944186	0.952116	0.95517	0.954816	0.95352	0.950309	0.9431	0.944577	0.945065	0.938894	0.955869	0.967322	0.967717	0.964029	0.957226	0.974177	0.980844	0.988423
	1.34944	0.986358	0.975358	0.976412	0.967791	0.963575	0.962147	0.959561	0.953236	0.945837	0.957115	0.95914	0.95245	0.943171	0.960109	0.959246	0.944904	0.949026	0.953641	0.953502	0.947648	0.962342	0.965354	0.952925	0.931244	0.947275	0.939692	0.941118	0.950375	0.947051	0.946528	0.948519	0.951165	0.954806	0.947656	0.949799	0.965452	0.955309	0.949079	0.94931	0.952723	0.956184	0.960864	0.99039	0.974036	0.959361	0.968483	0.986755	0.979937
	1.34932	0.98779	0.976749	0.96962	0.96415	0.974394	0.963186	0.960934	0.958529	0.950614	0.966413	0.954422	0.954606	0.959561	0.955468	0.944958	0.949426	0.946305	0.955052	0.951569	0.956987	0.970908	0.968513	0.954734	0.923186	0.925561	0.941196	0.934217	0.953962	0.945631	0.94894	0.94065	0.948126	0.954534	0.951369	0.9546	0.949626	0.96041	0.947134	0.95283	0.965526	0.955882	0.973599	0.979113	0.976364	0.970855	0.972637	0.984636	0.988239
	1.34921	0.993468	0.975071	0.968457	0.961655	0.971524	0.964856	0.966163	0.959902	0.958415	0.955551	0.957418	0.959888	0.965849	0.951238	0.948016	0.944162	0.957224	0.950667	0.950752	0.952957	0.950232	0.966577	0.950178	0.951046	0.939339	0.931539	0.928154	0.936609	0.949966	0.937373	0.950944	0.94787	0.950302	0.956869	0.953791	0.954767	0.959544	0.955056	0.953026	0.94285	0.976463	0.978896	0.993562	0.965095	0.962808	0.976307	0.981602	0.993236
	1.34909	0.994256	0.986166	0.971386	0.964322	0.962238	0.965337	0.967448	0.955827	0.968666	0.969579	0.965891	0.952892	0.958788	0.953061	0.948932	0.956506	0.956076	0.956685	0.951386	0.946602	0.964814	0.963636	0.949634	0.939435	0.935201	0.937415	0.93268	0.949922	0.943846	0.944805	0.949967	0.93746	0.953227	0.954379	0.976681	0.967004	0.965409	0.960417	0.95313	0.958633	0.969599	0.985198	0.982849	0.979224	0.972162	0.977028	0.98742	0.996124
	1.34898	1	0.988766	0.978633	0.981463	0.976026	0.975642	0.969715	0.963898	0.958333	0.966262	0.969401	0.963315	0.972946	0.960748	0.960028	0.952846	0.955938	0.957051	0.955536	0.954367	0.960387	0.976643	0.9527	0.940806	0.935377	0.936608	0.937915	0.954894	0.951208	0.941756	0.943816	0.947178	0.952597	0.957954	0.95909	0.968188	0.962797	0.964544	0.962538	0.974874	0.977184	0.983843	0.984505	0.978704	0.983246	0.979372	0.989765	0.995922
	1.34887	1.00355	0.982989	0.979794	0.968251	0.978584	0.972117	0.974093	0.961176	0.961998	0.972075	0.976176	0.969723	0.966919	0.970347	0.955748	0.952391	0.963161	0.966349	0.962101	0.951983	0.964725	0.972118	0.952346	0.952082	0.941589	0.937519	0.944217	0.947488	0.949928	0.94471	0.940047	0.953267	0.957559	0.960064	0.966362	0.974885	0.960667	0.965147	0.957622	0.966985	0.975863	1	0.992047	0.970185	0.962121	0.989873	0.995513	0.98378
	1.34875	0.992267	0.981762	0.97201	0.98223	0.978736	0.984835	0.970264	0.967944	0.963332	0.966282	0.974016	0.971261	0.970103	0.971357	0.951966	0.960546	0.959405	0.959391	0.95955	0.970419	0.976824	0.967388	0.943568	0.961624	0.934633	0.942388	0.935926	0.940926	0.954061	0.948268	0.947571	0.96297	0.968838	0.964652	0.971784	0.974063	0.96761	0.956647	0.964409	0.959479	0.982448	0.991605	0.989393	0.977757	0.989846	0.994678	0.996069	0.995326
	1.34864	0.991419	0.986406	0.980223	0.984499	0.975299	0.984386	0.973324	0.970546	0.974797	0.971443	0.974143	0.973528	0.970439	0.977804	0.954704	0.961438	0.9583	0.972842	0.967355	0.953516	0.981888	0.975712	0.960811	0.935343	0.94713	0.947978	0.945321	0.952466	0.968437	0.956639	0.952697	0.954574	0.968052	0.96348	0.978627	0.967692	0.963155	0.965855	0.964455	0.965978	0.983909	0.987621	0.999429	0.978648	0.972584	0.992989	0.997596	0.998738
	1.34853	0.9963	0.985569	0.973501	0.984622	0.971847	0.973902	0.981234	0.972054	0.973569	0.975244	0.981788	0.975554	0.991255	0.971182	0.971814	0.963871	0.9672	0.965311	0.974721	0.961202	0.971998	0.972874	0.961205	0.957127	0.950849	0.944861	0.956522	0.956207	0.959213	0.955402	0.948557	0.956549	0.9724	0.975794	0.976617	0.975701	0.971682	0.967624	0.967646	0.97514	0.98841	0.992116	1.00056	0.973768	0.976671	0.99223	1.0009	0.988962
	1.34841	0.994416	0.986969	0.980524	0.975883	0.974659	0.977994	0.969816	0.975807	0.971025	0.981049	0.987972	0.98102	0.9837	0.976643	0.968949	0.963844	0.974704	0.967742	0.964612	0.972745	0.981198	0.977827	0.960139	0.963058	0.962689	0.949839	0.944795	0.966004	0.962762	0.949555	0.961646	0.965825	0.961324	0.982113	0.969044	0.978745	0.973684	0.973798	0.964178	0.981841	0.986695	0.989476	0.988487	0.986111	0.983465	0.986775	0.995092	0.997495
	1.3483	1.00529	0.985219	0.981627	0.979158	0.976308	0.972685	0.980403	0.973867	0.976666	0.974608	0.983829	0.970301	0.988406	0.974518	0.967716	0.965347	0.966811	0.975751	0.96907	0.971808	0.984974	0.983607	0.958304	0.96223	0.953488	0.950949	0.949606	0.963351	0.96709	0.962922	0.959928	0.96802	0.976224	0.979481	0.977589	0.979512	0.973985	0.975368	0.975289	0.977016	0.989826	0.991657	0.999485	0.979161	0.98389	0.994848	0.996508	1.00179
	1.34818	0.998156	0.981032	0.976978	0.986072	0.968191	0.982821	0.973664	0.975841	0.977502	0.984224	0.989187	0.990084	0.984054	0.973944	0.963526	0.974542	0.978546	0.979101	0.978112	0.972841	0.990066	0.984127	0.970748	0.969168	0.957606	0.946239	0.957031	0.958459	0.971922	0.961312	0.955564	0.968064	0.973381	0.986137	0.979455	0.983707	0.982558	0.977797	0.973806	0.976616	0.988834	0.997178	1.00523	0.987383	0.985979	1.00199	0.998703	1.00113
	1.34807	0.997116	0.995502	0.982574	0.980371	0.982265	0.973126	0.987868	0.975969	0.985621	0.979584	0.98006	0.983382	0.973771	0.987004	0.966484	0.971531	0.971507	0.978671	0.98089	0.978893	0.983233	0.983886	0.986375	0.973887	0.95945	0.94996	0.963039	0.966446	0.972595	0.952779	0.966167	0.965606	0.981512	0.988873	0.981243	0.980049	0.980876	0.981177	0.970993	0.982923	0.99504	1.00403	0.993114	0.986	0.984761	0.992852	1.00202	1.00109
	1.34796	0.999138	0.989045	0.982634	0.973296	0.987676	0.976797	0.971065	0.973595	0.983073	0.982402	0.989313	0.982782	0.987995	0.983707	0.984446	0.976625	0.985648	0.988558	0.981157	0.980897	0.999774	0.987172	0.969888	0.960863	0.97596	0.949544	0.961333	0.97349	0.96672	0.965063	0.962061	0.969516	0.976608	0.983673	0.978166	0.988747	0.98086	0.969057	0.975412	0.992486	0.991623	1.01116	1.01403	0.988841	0.977898	0.992916	1.00603	0.99653
	1.34784	0.995927	0.98265	0.978017	0.984425	0.986842	0.98094	0.970667	0.970971	0.979499	0.987376	0.983632	0.98806	0.977173	0.983838	0.97771	0.972826	0.980296	0.98518	0.976027	0.979503	0.992767	0.982521	0.970049	0.956156	0.96338	0.958444	0.961593	0.967604	0.967817	0.961119	0.971311	0.974672	0.978129	0.981792	0.987606	0.968626	0.977723	0.980688	0.973052	0.990612	0.992808	1.00577	0.998016	0.989323	0.984502	0.993229	0.991796	1.00862
	1.34773	1.00199	0.984166	0.984709	0.983283	0.984778	0.980515	0.987772	0.975019	0.978054	0.988495	0.99144	0.975358	0.981041	0.980883	0.980988	0.974294	0.976818	0.981782	0.973485	0.983236	0.991447	0.974167	0.956568	0.968042	0.948954	0.960444	0.966803	0.978216	0.970685	0.968155	0.981842	0.979918	0.983146	0.990182	0.982419	0.996958	0.975708	0.980585	0.980926	0.984164	0.990523	0.993214	1.01279	0.98576	0.983671	0.996919	0.989903	0.990336
	1.34762	0.990061	0.989461	0.979617	0.98029	0.982885	0.979964	0.980338	0.979813	0.986167	0.989199	0.991071	0.987572	0.986336	0.992918	0.986675	0.978237	0.980071	0.986001	0.98371	0.979727	0.9932	0.994307	0.985704	0.974534	0.972282	0.958196	0.958707	0.978343	0.976094	0.976973	0.976683	0.983239	0.990642	0.985356	0.988174	0.988801	0.988764	0.989727	0.981473	0.984357	0.980468	1.00487	0.99727	0.997715	0.97703	0.989739	1.00045	0.997156
	1.3475	1.00523	0.996432	0.973022	0.987636	0.978093	0.981245	0.972172	0.978478	0.984433	0.989908	0.985572	0.987235	0.990664	0.991728	0.983792	0.978008	0.981695	0.98855	0.986055	0.978985	0.995117	0.991842	0.975891	0.965244	0.959666	0.960872	0.968321	0.983224	0.981427	0.966994	0.980938	0.985299	0.995627	0.99622	0.984966	0.986277	0.984865	0.986981	0.981844	0.989819	0.995842	1.00326	1.00423	0.994034	0.983755	0.989188	1.01302	1.00657
	1.34739	1.00746	0.985729	0.984379	0.97874	0.991544	0.987941	0.983912	0.984798	0.983469	0.980155	0.988749	0.991691	0.992212	0.98555	0.981417	0.983066	0.981792	0.990402	0.990045	0.991886	0.998352	0.992721	0.98573	0.96779	0.96973	0.962296	0.971753	0.983392	0.977113	0.971948	0.974695	0.980063	0.992424	0.99288	0.992385	1.00129	0.987483	0.994209	0.975847	0.986922	0.999071	0.995931	1.00201	0.991798	0.995896	0.992524	0.997037	1.00938
	1.34728	0.996	0.990265	0.966295	0.984542	0.978698	0.982967	0.981115	0.982116	0.985331	0.989089	0.993225	0.985628	0.989973	0.991737	0.985057	0.982178	0.985869	0.998553	0.991129	0.986374	0.988211	0.992156	0.987277	0.969996	0.972101	0.957347	0.954881	0.985084	0.968308	0.97451	0.97651	0.990518	0.988226	0.989027	0.992555	0.989378	0.989318	0.996125	0.985721	0.988365	0.999429	1.00099	0.999321	0.994273	0.994606	0.992586	1.00359	1.00705
	1.34716	0.993757	0.992084	0.966969	0.985049	0.974591	0.984039	0.985724	0.97788	0.983552	0.987035	0.996703	0.987608	0.994845	0.998394	0.98704	0.983239	0.994325	0.989206	0.992609	0.995228	0.992338	1.0051	0.987894	0.972012	0.983835	0.967697	0.973613	0.980059	0.981829	0.984928	0.986847	0.982388	0.989609	0.991877	0.990849	0.995418	0.984526	0.988122	0.986258	0.980697	0.99351	1.00503	1.01191	0.984805	0.987691	0.991587	1.00294	1.00741
	1.34705	1.00463	0.990149	0.97583	0.987136	0.975811	0.990058	0.980107	0.982916	0.980641	0.980961	0.990176	0.985379	0.985139	0.992618	0.986798	0.985542	0.989961	0.988797	0.991837	0.97984	1.00115	1.00032	0.978014	0.977744	0.966763	0.965412	0.971775	0.980347	0.982766	0.967035	0.976809	0.993303	0.988059	0.989004	0.997166	0.991366	0.981813	0.980785	0.994978	0.993128	0.996178	1.00606	1.01184	0.994968	0.982112	0.986957	1.0023	1.00097
	1.34694	1.00188	0.992637	0.988375	0.98834	0.991861	0.986609	0.985127	0.982631	0.988087	0.989607	0.995907	0.986212	0.980912	0.99454	0.982763	0.97849	0.987363	0.996198	0.985886	0.989605	0.999295	0.993746	0.985591	0.976771	0.961497	0.962217	0.976975	0.976307	0.97998	0.982726	0.980326	0.984756	0.992854	0.996199	0.997613	1.00103	0.998617	0.99187	0.982431	0.981321	0.99432	1.0008	0.999079	0.99365	0.977764	1.00345	1.00537	1.00243
	1.34682	0.997907	0.995523	0.978161	0.989696	0.977597	0.979841	0.984246	0.970452	0.988053	0.984708	0.995317	0.984837	0.996833	0.995699	0.994426	0.982729	0.984456	0.989126	0.990034	0.9946	1.00664	0.99934	0.983553	0.970678	0.974135	0.963692	0.975301	0.97764	0.985367	0.977176	0.979297	0.993189	0.996484	0.991107	1.00436	0.985901	0.982604	0.987197	1.00095	0.994636	0.994833	1.00341	1.00588	0.99455	0.981907	1.00046	0.988307	0.999251
	1.34671	0.994415	0.994455	0.978971	0.99519	0.981919	0.975533	0.984199	0.980741	0.994502	0.985935	0.994338	0.991899	1.00462	1.00822	0.984608	0.972796	0.99557	0.996025	0.990623	0.991356	0.990856	1.0031	0.987264	0.992552	0.973954	0.967895	0.96653	0.976786	0.982359	0.983623	0.968619	0.981373	0.987175	0.987649	0.990236	0.994769	0.991089	0.984607	0.982886	0.987222	0.999034	1.01396	1.0056	0.999763	0.977499	0.998431	1.00811	1.0015
	1.3466	1.00525	0.988558	0.976241	0.978512	0.98669	0.985145	0.982353	0.985447	0.981016	0.996428	1.00328	0.995306	0.991776	0.995617	0.985379	0.978805	1.00266	1.00164	0.991397	1.00728	1.00653	0.997826	0.982996	0.981031	0.972688	0.962408	0.981179	0.980465	0.986712	0.974174	0.975029	0.993708	0.996837	0.991104	1.00048	0.995035	0.989421	0.983765	0.980208	0.990002	0.993986	1.00841	1	0.99173	0.98982	0.992255	0.998369	1.00124
	1.34648	0.994265	0.998759	0.980251	0.980035	0.983614	0.982593	0.990066	0.986121	0.991264	0.981217	0.994953	0.988584	1.00166	0.992927	0.976054	0.996472	0.988367	0.999047	1.00264	0.989342	0.991501	1.01362	0.987283	0.983094	0.974026	0.962299	0.979232	0.992419	0.987323	0.981833	0.981829	0.987537	0.995992	0.990611	0.992098	0.998713	0.986298	0.988369	0.990029	0.988116	0.992681	1.00427	1.01612	0.994463	0.982403	1.00827	0.997441	1.00323
	1.34637	1.00366	0.992699	0.9707	0.985749	0.977292	0.981784	0.979766	0.982029	0.991756	0.992417	0.992816	1.00197	0.989508	0.99144	0.989823	0.980142	0.994163	0.998548	0.990782	0.987139	1.00341	1.00868	0.984581	0.975243	0.974864	0.965975	0.963333	0.977214	0.986308	0.979605	0.972419	0.986624	0.99756	0.997965	1	1.00137	0.992281	0.990944	0.980679	0.994319	0.994636	1.00944	1.00524	0.995196	0.992637	0.992223	1.00163	1.01217
	1.34626	1.00441	0.993889	0.972526	0.989701	0.987083	0.986214	0.983563	0.983424	0.983624	0.991791	0.988734	0.991288	0.997439	0.978261	0.992992	0.985455	0.994369	0.99341	0.98366	1.00584	1.01281	0.991301	0.974774	0.99325	0.97134	0.970084	0.97506	0.983939	0.977014	0.979811	0.980045	0.984723	0.986484	0.985123	0.997698	0.993899	0.99054	0.995902	0.977148	0.982304	1.00057	1.00607	1.00144	1.00365	0.987078	1.00069	1.0124	1.01231
	1.34614	0.998988	0.986848	0.981768	0.990122	0.986257	0.987117	0.988174	0.983312	0.986436	0.991134	0.996249	0.991917	0.990568	1	0.984312	0.983429	0.98739	0.998568	0.995297	0.985489	1.00453	1.00616	0.99187	0.967472	0.963704	0.983566	0.980104	0.987266	0.987937	0.975023	0.983765	0.990805	1.0045	0.992687	0.984426	1.00084	0.986209	1.00615	0.986737	0.988207	0.999617	1.00542	1.01331	0.989615	0.99437	1.00257	1.00327	1.00399
	1.34603	0.995161	0.982124	0.982931	0.97882	0.97988	0.985075	0.993066	0.983174	0.98658	0.997016	0.990723	0.998152	0.984334	1.00586	0.98283	0.9875	0.998735	0.993289	0.996747	0.992754	1.0089	1.00282	0.978078	0.976733	0.984316	0.97803	0.97433	0.992191	0.979566	0.98541	0.972653	0.996495	0.991573	0.993385	0.996898	0.996588	0.986599	0.989771	0.98099	1.00022	1.00418	1.01065	1.01553	0.992388	0.993338	1.00023	1.00286	1.01267
	1.34592	1.00182	0.978901	0.968574	0.985028	0.992518	0.978089	0.990468	0.986055	0.991404	0.988581	0.993531	0.995593	0.988017	0.992636	0.981877	0.985984	0.989977	0.986765	0.992508	0.988003	1.00693	1.00499	0.981308	0.980699	0.976297	0.981219	0.975711	0.979607	0.989518	0.975622	0.97659	0.986718	0.990196	1.00025	1.00474	0.988816	0.985256	0.975885	0.988046	0.991054	0.998743	0.998122	1.00596	1.00048	0.985696	0.995006	1.01151	1.01506
	1.3458	0.996327	0.987618	0.980035	0.985856	0.98481	0.980943	0.977048	0.986427	0.980286	0.998229	0.995677	0.987013	0.995434	0.991028	0.984528	0.99235	0.996075	0.988665	0.989345	0.996726	1.00553	1.01767	0.980093	0.971515	0.978481	0.966141	0.977561	0.996094	0.979423	0.978953	0.986556	0.986239	0.997133	0.987186	0.991575	0.999093	0.992862	0.984806	0.981203	0.9906	0.994103	1.00138	1.00993	0.997486	0.975169	0.994067	1.00867	0.999248
	1.34569	0.990995	0.980499	0.977587	0.98731	0.982588	0.990821	0.987529	0.984451	0.991954	0.988947	0.987077	0.984032	0.995369	0.993068	0.991252	0.984249	0.998358	0.996615	0.995283	0.996605	1.00481	0.998599	0.994309	0.974937	0.978201	0.964219	0.975742	0.986329	0.98343	0.970741	0.98103	0.989089	0.989892	0.988588	1.00278	0.992215	0.988981	0.985183	0.994883	0.995485	1.00293	1.00764	1.01208	0.99383	0.977533	1.00425	0.999761	1.00682
	1.34558	0.991718	0.981489	0.983422	0.981293	0.975183	0.983016	0.97902	0.980264	0.995648	0.992487	0.997836	0.994994	0.986791	0.989226	0.983476	0.990699	0.994101	0.998186	0.992594	0.993316	1.00951	1.00777	0.986842	0.973165	0.975601	0.967146	0.976058	0.989006	0.978918	0.981544	0.987808	0.995408	0.985967	0.996148	1.00342	0.995958	0.990644	0.992645	0.981954	0.992943	0.999326	1.00745	0.994232	0.985471	0.992911	0.996509	1.00492	0.99213
	1.34546	0.998518	0.97837	0.973105	0.980974	0.985745	0.986619	0.977556	0.987605	0.986499	0.99431	0.992571	1.00222	1.00196	1	0.98392	0.991017	0.99278	1.00109	0.991331	0.989476	1.00439	0.997819	0.978944	0.974311	0.988209	0.968895	0.990418	0.99493	0.987699	0.979756	0.978097	1.00046	0.99753	0.993132	1.00317	1.01141	0.991134	1.00107	0.996111	0.979473	0.998884	1.00637	0.996721	0.989784	0.99706	0.986608	1.00027	1.00243
	1.34535	0.991263	0.986445	0.970861	0.970187	0.984757	0.991899	0.978544	0.986973	0.992536	0.99135	0.998689	0.997857	0.999371	0.991641	0.986386	0.988838	0.996169	1.00672	0.999334	0.990947	1.00299	1.01599	0.993836	0.976597	0.981017	0.973961	0.975681	0.990971	0.987469	0.985643	0.990249	0.987312	0.997946	1.0028	1.00092	1.00103	1.00223	0.98784	0.99131	0.991785	1.00579	1.0084	1.00583	1.00142	0.985434	0.992892	1.00484	1.00202
	1.34524	0.985437	0.986925	0.98715	0.981198	0.980758	0.987342	0.979623	0.989362	0.996575	0.994263	0.999049	0.989851	1.00063	1.00228	0.983357	0.990971	0.995968	0.995951	0.992783	0.990058	1.00496	0.995539	0.994868	0.980645	0.986142	0.966323	0.980074	0.979145	0.979309	0.975145	0.985458	0.991572	0.999125	0.998297	0.992063	0.993631	0.991045	0.987268	0.995271	0.980585	1.00343	1.01021	1.01253	0.995671	0.982362	0.989109	1.00617	1.0043
	1.34513	0.994622	0.976678	0.986117	0.977841	0.98559	0.988792	0.985742	0.982517	0.986566	0.992006	0.991825	1.0006	0.99235	0.996133	0.98459	0.986762	0.995269	1.00574	0.99731	1.00242	1.00835	1.00966	0.994415	0.996109	0.974772	0.974288	0.978594	0.978163	0.992176	0.97585	0.97737	0.997134	0.989518	1.0047	1.00785	1.00417	1	0.994978	0.992096	0.981014	0.999499	1.00386	1.00914	0.991726	0.991857	0.994069	0.993074	1
	1.34501	0.994128	0.986105	0.971822	0.985116	0.996953	0.979707	0.986369	0.976545	0.991472	0.993212	0.992958	0.999004	0.993757	0.995416	0.98662	0.993075	0.997149	1.0028	0.990081	0.997172	1.01146	1.00326	0.976048	0.979481	0.975139	0.982422	0.972938	0.995877	0.986263	0.988363	0.979548	0.984022	0.993448	0.997128	1.00342	0.999381	0.991156	0.99109	0.991223	0.996325	1.00434	1.00797	1.00674	0.998776	0.980298	0.996829	0.998836	0.995092
	1.3449	0.987112	0.981969	0.968938	0.988701	0.98015	0.980167	0.979246	0.980204	0.983835	1.00312	1.00097	1.00201	0.994363	1.00023	0.998735	0.986299	0.990532	1.00095	1.00161	0.99087	1.00408	1.00325	0.993563	0.997224	0.972501	0.969903	0.97582	0.990844	0.983471	0.988536	0.985671	0.999101	0.996229	1.0034	0.990114	0.997079	0.994137	0.989681	0.987323	0.986421	1.0023	0.99437	1.01361	0.994684	0.984694	0.999396	0.999401	0.994049
	1.34479	0.981946	0.98636	0.969549	0.976408	0.975263	0.979946	0.982941	0.984196	0.985052	0.992768	0.991321	0.991958	0.996752	0.999306	0.985282	0.987805	0.982683	0.999809	0.996761	0.993215	1.01184	1.0128	0.97881	0.988924	0.977703	0.976638	0.986519	0.982603	0.984944	0.989657	0.990262	0.992081	1.00345	0.998963	0.993272	0.994054	0.996343	0.998778	0.979569	0.979048	1.00369	0.999194	1.00589	0.986211	0.986242	0.996934	0.998444	0.998392
	1.34467	0.989905	0.976646	0.976062	0.978497	0.971975	0.981026	0.983256	0.973112	0.983265	0.991303	0.993877	0.993353	0.994923	0.999767	0.992607	0.988793	0.993759	0.995628	0.987859	0.999788	1.00218	1.00563	0.993177	0.978707	0.978772	0.968981	0.982402	0.991586	0.990852	0.97956	0.977485	0.992212	0.996752	1.00297	1.00672	1.00401	0.993054	0.992477	0.978543	0.990601	0.998605	1.0041	0.993592	0.994016	0.990241	0.988889	1.01466	0.994615
	1.34456	0.974132	0.966146	0.971108	0.971397	0.979459	0.978526	0.97088	0.98081	0.990235	0.985743	1.00097	1.00124	0.992744	0.993907	0.985374	0.977487	0.989021	0.999436	1.00279	0.989897	1.00898	0.995114	0.995044	0.992496	0.979715	0.981187	0.979787	0.991216	0.994322	0.981496	0.986473	0.987984	0.998451	1.00106	0.994983	0.998171	0.985087	0.993408	0.979725	0.995509	1.00878	1.00839	1.0102	0.991763	0.98788	0.993448	1.00406	1.00135
	1.34445	0.978502	0.975901	0.969522	0.97308	0.979167	0.982014	0.968453	0.983173	0.990417	0.994512	0.991337	1.00306	1.00088	0.987564	0.987497	0.981893	0.992868	0.999428	0.998617	0.988648	1.01329	1.01014	0.995372	0.970055	0.978466	0.968992	0.98071	0.993856	0.984194	0.978845	0.985323	1.00144	1.00099	1.00457	1.00886	0.98879	0.985778	0.987755	0.981949	1	1.00125	1.00557	1.00787	0.989374	0.989707	1.00259	0.99025	0.996337
	1.34433	0.989625	0.98657	0.977451	0.976621	0.979625	0.974525	0.984674	0.97908	0.984397	1.00319	0.999788	0.998939	1.00353	0.995564	0.985168	0.99096	0.99816	0.993016	0.992786	0.995625	1.01355	1.01659	0.983396	0.979657	0.985294	0.976603	0.988616	0.99565	0.987699	0.984794	0.980227	0.986978	0.98943	1.00374	1.00375	0.999735	0.994118	0.9967	0.990485	0.990012	1.00768	1.01033	1.00025	1.00319	0.983998	0.997077	1.00029	0.995785
	1.34422	0.981216	0.970352	0.970054	0.974219	0.986547	0.985966	0.971779	0.985033	0.986914	0.993291	0.994097	0.989511	1.00479	0.999292	0.991228	0.992816	0.99449	1.00038	0.992483	0.992745	1.0049	1.00391	0.990913	0.980063	0.994755	0.976491	0.976507	0.981545	0.989183	0.985297	0.988506	0.990369	0.995204	0.998265	1.00225	0.995444	0.988717	1.00388	0.989844	0.994265	0.998262	1.01299	1.00527	0.997939	0.978555	0.995864	0.996351	0.995545
	1.34411	0.989323	0.970453	0.956646	0.975006	0.980585	0.974206	0.982889	0.98163	0.982898	0.992889	0.992673	0.994952	0.984103	1.00103	0.976383	0.99329	1.00926	0.99884	0.997421	0.992642	1.01437	1.00266	0.991503	0.970391	0.983767	0.975372	0.96963	0.984783	0.992092	0.988746	0.983516	0.992438	0.994965	1.00132	0.994764	0.998632	0.991205	0.99802	0.989631	0.996209	0.999035	1.00186	1.00142	0.991665	0.988029	0.988411	0.999255	1.00164
	1.344	0.982053	0.965449	0.968313	0.975718	0.976079	0.974055	0.984075	0.981396	0.979295	0.98176	0.993873	0.987371	0.99314	0.987825	0.980578	0.994636	0.986746	0.9992	1.00781	0.996131	1.01118	0.999002	0.985524	0.974328	0.984843	0.975811	0.976083	0.988398	0.984362	0.985054	0.987662	0.997316	0.996401	0.989579	1.00474	0.996715	0.984154	0.988405	0.9846	0.986435	1.00385	0.997568	1.0089	0.989092	0.979454	0.992062	1.00509	0.995107
	1.34388	0.984935	0.966392	0.959641	0.969978	0.976244	0.982556	0.983943	0.974515	0.988882	0.990312	0.994515	1.0009	0.992128	0.984602	0.982785	0.986806	0.997123	1.0032	0.995694	0.989125	1.00902	1.00438	0.99113	0.976957	0.981312	0.980138	0.978337	0.987556	0.993305	0.987493	0.992128	0.99562	1	0.98837	0.999499	1.00331	0.9968	0.988732	0.984433	0.985706	0.993492	1.00685	1.0052	0.985896	0.989189	0.986434	0.985649	0.984123
	1.34377	0.984331	0.970335	0.96788	0.964947	0.987169	0.973474	0.974771	0.982436	0.983416	0.993939	0.988487	0.98956	1.00025	1	0.978197	0.986467	1.00263	1.00596	0.98905	0.995401	1.00138	1.00209	0.993304	0.97518	0.985171	0.98394	0.983152	0.995274	0.99766	0.984073	0.986922	0.995622	0.997371	0.997352	1.00225	1.00382	1	0.986891	0.987877	0.987853	0.9996	0.995585	1.00456	0.991819	0.974841	0.992102	1.00552	1.00306
	1.34366	0.988895	0.977359	0.965961	0.966676	0.96756	0.974023	0.972052	0.97266	0.98211	0.989638	0.990316	0.988533	0.987452	0.993059	0.976115	0.978897	0.994918	1.00076	0.998775	0.98414	0.994477	1.00154	0.985449	0.97506	0.98318	0.972022	0.972557	0.988917	0.99303	0.986787	0.981238	0.990609	0.995363	0.995554	0.994007	0.986021	0.980246	0.991499	0.990325	0.989478	1.00485	0.99407	1.00632	0.991009	0.987333	0.991094	0.990328	1.00353
	1.34355	0.971602	0.970564	0.963751	0.965949	0.976086	0.974163	0.969478	0.970267	0.97266	0.993866	0.993224	0.99078	0.99262	0.988184	0.990438	0.992838	0.996149	1.00435	1.00617	0.991765	1.00912	1.00468	0.98	0.972031	0.979568	0.964692	0.982646	0.984452	0.986714	0.981436	0.984292	0.987761	0.998994	1.002	0.991777	0.99563	0.995908	0.980569	0.988825	0.990235	0.996351	1.00781	1.00579	0.990262	0.987514	0.996407	0.991388	0.993611
	1.34343	0.972301	0.959435	0.959218	0.9689	0.96664	0.968726	0.966457	0.9832	0.981957	0.989263	0.977738	0.989275	0.994702	0.982759	0.985151	0.998833	1.00809	0.996465	0.987823	0.997611	1.00286	1.00216	0.980516	0.979445	0.98053	0.973305	0.981175	0.986225	0.978285	0.990762	0.974775	0.996559	1.00441	0.996723	0.997783	1.00108	0.985972	0.983515	0.988089	0.984037	0.99521	0.999363	0.997296	0.988506	0.980959	0.991054	1.00295	0.993282
	1.34332	0.973721	0.966339	0.965595	0.967943	0.978139	0.974753	0.971269	0.975916	0.981169	0.983914	0.990823	0.980217	0.99623	0.993648	0.980507	0.983019	1.00145	1.00103	0.989548	0.99514	1.00253	1.00423	0.977034	0.989637	0.971941	0.978675	0.97755	0.98541	0.986429	0.982057	0.985821	0.984554	0.995861	0.99934	1.00417	0.987674	0.993939	0.995757	0.97355	0.984078	0.989802	1.00794	0.999262	0.986757	0.979471	0.988567	1.00425	0.995012
	1.34321	0.967969	0.960744	0.94593	0.96807	0.966777	0.972723	0.966281	0.969171	0.979029	0.988667	0.989578	0.994365	0.986463	0.988022	0.989816	0.982008	0.982452	0.992154	0.993769	0.994793	1.00222	0.99159	0.997541	0.988126	0.980087	0.970203	0.981722	0.979109	0.979761	0.990713	0.980574	0.988359	0.995195	0.991206	0.995455	0.990408	0.974433	0.990792	0.990174	0.991808	0.997206	1.00231	1.0039	0.97479	0.972304	0.988786	0.990464	0.980606
	1.34309	0.976258	0.951948	0.952557	0.961505	0.970696	0.970178	0.9667	0.977981	0.982218	0.988671	0.987073	0.99149	0.997004	0.991053	0.987139	0.970454	0.993967	1.0128	0.996583	0.994982	1.00844	1.00643	0.975691	0.987103	0.975892	0.970478	0.973669	0.986163	0.973767	0.968303	0.974673	0.98936	0.997688	0.982617	0.995198	1.00112	0.980227	0.992233	0.975824	0.977606	0.994228	0.999364	0.999514	0.986067	0.971935	0.972442	0.995267	0.979034
	1.34298	0.971771	0.965733	0.949058	0.954691	0.957373	0.958786	0.967766	0.968057	0.974995	0.979789	0.989305	0.991185	0.994389	0.979625	0.979891	0.9838	0.99213	0.993114	0.997181	0.99335	1.00918	1.0022	0.993056	0.984802	0.991577	0.968382	0.977419	0.983148	0.980267	0.970981	0.984019	0.989674	0.998679	1	0.997662	0.989266	0.982743	0.983621	0.975422	0.98304	0.988784	0.99872	1.01099	0.990186	0.979721	0.979121	0.995244	0.976489
	1.34287	0.963776	0.95258	0.944768	0.953528	0.967968	0.964157	0.962471	0.971082	0.985614	0.983893	0.985616	0.992549	0.994977	0.981062	0.974755	0.982477	0.986478	1.00524	0.989979	0.999721	1.00775	1.01323	0.97594	0.973658	0.974178	0.972578	0.976611	0.986523	0.989039	0.985998	0.969528	0.988838	0.991434	0.995452	0.988381	0.984438	0.982803	0.987589	0.972508	0.984375	0.995354	1.00387	0.992915	0.985023	0.96772	0.991878	0.983831	0.983862
	1.34276	0.970215	0.955939	0.949242	0.963059	0.964898	0.960267	0.960031	0.962281	0.986438	0.970017	0.988209	0.990699	0.997033	0.98415	0.988547	0.989517	0.993045	0.994589	1.00029	0.995943	1.00388	0.999126	0.980962	0.990063	0.982927	0.964168	0.978652	0.978393	0.991815	0.981857	0.975103	0.995202	0.991554	1.00175	1.00349	0.996502	0.987658	0.97747	0.969621	0.97973	0.996171	0.990264	0.987666	0.977783	0.976374	0.979452	0.990521	0.973447
	1.34264	0.962972	0.955144	0.942285	0.959576	0.97076	0.966709	0.963563	0.964286	0.97635	0.979761	0.985398	0.981941	0.994918	0.983994	0.978759	0.984736	0.985177	0.989759	0.981647	0.988943	1.00184	0.995764	0.997499	0.982245	0.975645	0.968089	0.992203	0.979809	0.98358	0.981069	0.990034	0.990163	0.995357	0.99233	0.994712	0.996394	0.978422	0.979313	0.97493	0.984891	0.995691	1	0.987882	0.973911	0.982488	0.989538	0.993225	0.979217
	1.34253	0.955386	0.965175	0.933593	0.955183	0.962582	0.954716	0.957197	0.967125	0.974061	0.975415	0.986506	0.985613	0.996013	0.97906	0.980198	0.977838	0.992589	0.997459	0.993621	0.991814	1.00779	1.00433	0.978027	0.976888	0.988083	0.965789	0.976085	0.982538	0.995196	0.985036	0.982021	0.982261	0.9911	0.985932	0.98917	0.987433	0.976985	0.985045	0.988346	0.98223	0.99233	0.988753	0.99168	0.973976	0.970825	0.98046	0.98656	0.969284
	1.34242	0.954031	0.944387	0.943721	0.951597	0.95903	0.957483	0.957345	0.972462	0.979117	0.979992	0.978994	0.990424	0.993654	0.972261	0.980417	0.978893	0.983688	0.991311	0.992406	0.987069	1.01392	0.997862	0.985113	0.985479	0.977295	0.965414	0.980729	0.983524	0.994017	0.984643	0.978169	0.980202	0.993634	0.985025	0.986278	0.977477	0.988563	0.984449	0.98552	0.980198	0.981731	0.983498	0.985809	0.965257	0.965378	0.990274	0.98256	0.981356
	1.34231	0.956772	0.941899	0.949006	0.954725	0.95877	0.959903	0.969762	0.964948	0.975183	0.973272	0.983488	0.98884	0.978266	0.97905	0.976101	0.981271	0.988476	1	1.00094	0.99197	0.999004	1.00336	0.980143	0.970091	0.986173	0.966499	0.977399	0.975193	0.973945	0.977141	0.986548	0.99053	0.995263	0.990981	0.994955	0.980908	0.973903	0.978913	0.974962	0.975466	0.991013	0.986305	0.993062	0.965093	0.960286	0.973555	0.982365	0.973163
	1.34219	0.945262	0.946164	0.951263	0.953606	0.950721	0.959434	0.972308	0.956449	0.967687	0.965302	0.974872	0.984835	0.987273	0.978017	0.977144	0.977142	0.989583	0.985036	0.987912	0.985241	1.00299	0.994977	0.979767	0.980956	0.977849	0.964064	0.973677	0.99174	0.978875	0.981313	0.975642	0.986518	0.982088	1.00085	0.995712	0.977289	0.973903	0.972624	0.979791	0.970217	0.978451	0.975985	0.989021	0.965829	0.965008	0.975703	0.973978	0.979739
	1.34208	0.943976	0.93617	0.946429	0.947116	0.951983	0.961689	0.962209	0.970369	0.969276	0.976013	0.976936	0.97479	0.975995	0.991337	0.977489	0.974595	0.987046	0.988981	0.990467	0.986281	0.998285	0.991694	0.977429	0.969117	0.966076	0.978603	0.978272	0.978245	0.987872	0.97883	0.982148	0.992987	0.987968	0.98629	0.988194	0.986955	0.974494	0.974177	0.97429	0.969848	0.978658	0.977662	0.99276	0.968452	0.962451	0.96354	0.977076	0.973692
	1.34197	0.941063	0.938776	0.937676	0.947098	0.960136	0.959188	0.953916	0.951881	0.962643	0.971195	0.976988	0.96955	0.979739	0.983852	0.969842	0.972749	0.986114	0.994464	0.992738	0.988312	0.999247	1.0017	0.979592	0.9776	0.974465	0.961417	0.973457	0.97759	0.989503	0.972959	0.972631	0.984333	0.975741	0.987607	0.979288	0.981633	0.97359	0.984512	0.973325	0.979603	0.976632	0.986542	0.9784	0.961992	0.964123	0.960191	0.967807	0.969623
	1.34186	0.936736	0.94057	0.93145	0.944286	0.940776	0.949487	0.960638	0.954326	0.958743	0.980697	0.976824	0.978238	0.977913	0.971123	0.978634	0.973679	0.991267	0.991899	0.984439	0.983603	1.00205	0.997244	0.982477	0.967181	0.974301	0.965037	0.982866	0.979853	0.985564	0.970561	0.983934	0.979093	0.989852	0.983774	0.985372	0.98274	0.978955	0.964745	0.964547	0.960718	0.979342	0.982487	0.983773	0.957622	0.963452	0.964699	0.974985	0.970087
	1.34174	0.945792	0.930787	0.931106	0.935413	0.948197	0.947557	0.955998	0.95605	0.960405	0.967869	0.975259	0.980863	0.97884	0.966932	0.965517	0.977973	0.976667	0.994504	0.985869	0.982542	1.00329	1.00549	0.982629	0.974328	0.972317	0.965805	0.974507	0.975931	0.980712	0.974094	0.971803	0.97719	0.981564	0.980012	0.986991	0.988269	0.964549	0.967488	0.976011	0.978749	0.981633	0.979071	0.978723	0.973676	0.957105	0.969958	0.97193	0.945477
	1.34163	0.940629	0.943343	0.929009	0.948822	0.944655	0.950173	0.944941	0.946513	0.956113	0.970112	0.97501	0.978513	0.972727	0.971221	0.970358	0.970677	0.992877	0.983278	0.994268	0.990173	1.00127	0.983729	0.971691	0.980809	0.983619	0.973412	0.975654	0.979929	0.975468	0.979732	0.97823	0.977075	0.983538	0.987991	0.981599	0.966571	0.96236	0.965991	0.968436	0.971905	0.976331	0.979957	0.992048	0.971516	0.956535	0.961562	0.969016	0.958947
	1.34152	0.926873	0.933535	0.930919	0.937939	0.93617	0.949271	0.940896	0.950416	0.954413	0.959199	0.967004	0.970013	0.966387	0.973356	0.97079	0.966806	0.98783	0.985655	0.98487	0.987377	0.995729	0.990866	0.982136	0.956026	0.964591	0.962764	0.966997	0.974668	0.977678	0.970822	0.975478	0.973395	0.981637	0.983427	0.983673	0.977865	0.974227	0.961216	0.960928	0.970595	0.973799	0.979818	0.974266	0.960569	0.958138	0.962844	0.958668	0.95532
	1.34141	0.928768	0.921592	0.927358	0.934317	0.941919	0.946354	0.937407	0.951476	0.962347	0.962242	0.977843	0.97311	0.970082	0.975778	0.963573	0.978513	0.971947	0.97688	0.971503	0.977093	0.997205	0.986441	0.973427	0.981735	0.961303	0.971283	0.970212	0.971349	0.975775	0.97252	0.977478	0.97759	0.996415	0.974086	0.976396	0.989851	0.973694	0.979599	0.971848	0.969165	0.984135	0.983693	0.987798	0.968345	0.955896	0.953728	0.967388	0.954577
	1.3413	0.924528	0.919632	0.923115	0.941149	0.934003	0.934471	0.96123	0.946883	0.959571	0.966329	0.971212	0.963085	0.974152	0.969886	0.968076	0.969402	0.969486	0.983827	0.981919	0.979592	0.991304	0.996559	0.980415	0.967347	0.966965	0.960882	0.960177	0.974556	0.968289	0.965759	0.974484	0.978743	0.984817	0.985371	0.98827	0.981069	0.963806	0.963768	0.961224	0.962065	0.971243	0.976726	0.975058	0.958392	0.945574	0.934928	0.954795	0.938456
	1.34118	0.91783	0.917114	0.917528	0.93097	0.928385	0.939318	0.940435	0.947072	0.952967	0.950842	0.965128	0.962223	0.965818	0.966584	0.96753	0.969192	0.979973	0.978623	0.978357	0.964201	0.996907	0.994826	0.971749	0.977578	0.977692	0.968576	0.964435	0.966493	0.976009	0.971754	0.973413	0.986586	0.984632	0.981603	0.974664	0.977506	0.974375	0.972037	0.973222	0.964194	0.977398	0.974761	0.969952	0.955432	0.944733	0.945705	0.953841	0.942521
	1.34107	0.908822	0.9112	0.914405	0.9249	0.941125	0.92988	0.939751	0.943415	0.954092	0.965143	0.966028	0.965314	0.960226	0.980289	0.9632	0.964947	0.978056	0.976106	0.9819	0.973381	0.987556	0.9851	0.969697	0.958434	0.965251	0.9628	0.96216	0.975917	0.983284	0.967031	0.970874	0.983391	0.97793	0.977484	0.979936	0.969169	0.965381	0.955965	0.960806	0.971513	0.970275	0.979726	0.972248	0.948025	0.940132	0.952302	0.955176	0.939145
	1.34096	0.909806	0.896006	0.919505	0.91804	0.934996	0.933879	0.937021	0.945173	0.951364	0.952526	0.963148	0.964796	0.965621	0.971464	0.959869	0.955538	0.970733	0.98627	0.975622	0.979578	0.988054	0.996809	0.973579	0.962127	0.965891	0.963279	0.967409	0.977917	0.968177	0.966646	0.97603	0.972035	0.982524	0.975808	0.983074	0.981325	0.952266	0.964782	0.954093	0.966876	0.960726	0.964885	0.965976	0.952819	0.935457	0.948575	0.940335	0.93566
	1.34085	0.907145	0.901562	0.901763	0.904399	0.923837	0.938074	0.931725	0.935569	0.945498	0.956194	0.960668	0.958838	0.965116	0.955846	0.960272	0.963676	0.960488	0.98154	0.981084	0.969196	0.987624	0.995281	0.979727	0.969953	0.957082	0.965497	0.963628	0.970838	0.975369	0.96819	0.970984	0.976097	0.981534	0.989995	0.976712	0.964497	0.963173	0.956167	0.946962	0.964278	0.971749	0.97196	0.96219	0.941341	0.940842	0.933121	0.938315	0.925711
	1.34073	0.913173	0.902623	0.891973	0.918926	0.9156	0.922125	0.927703	0.940317	0.946987	0.960065	0.954536	0.968939	0.959639	0.959693	0.95502	0.956166	0.967457	0.980221	0.963454	0.972406	0.993494	0.985951	0.965264	0.960034	0.971406	0.959881	0.969718	0.968838	0.971909	0.967728	0.964099	0.970874	0.971679	0.96881	0.975041	0.973676	0.956729	0.969344	0.947661	0.966549	0.963652	0.968714	0.953208	0.941619	0.932536	0.924579	0.931616	0.93082
	1.34062	0.90693	0.884281	0.901255	0.900246	0.913478	0.9122	0.926531	0.943062	0.949585	0.95539	0.948397	0.953097	0.958001	0.956901	0.946895	0.966301	0.971201	0.971641	0.974346	0.973938	0.984054	0.971882	0.971605	0.957076	0.965586	0.940102	0.963135	0.967351	0.963053	0.960371	0.956911	0.971533	0.976754	0.968546	0.971374	0.96833	0.957197	0.948428	0.952228	0.949846	0.954747	0.961808	0.952692	0.925028	0.926595	0.935284	0.925378	0.929412
	1.34051	0.914106	0.904523	0.88892	0.904213	0.911805	0.920107	0.918961	0.929605	0.936226	0.951848	0.957152	0.950868	0.959204	0.952225	0.950055	0.953041	0.965408	0.973679	0.955706	0.975136	0.978503	0.991938	0.966302	0.966552	0.959789	0.96167	0.956293	0.963355	0.96351	0.959891	0.950499	0.960633	0.968805	0.962338	0.966237	0.967876	0.947649	0.96433	0.940816	0.950598	0.947796	0.955365	0.953043	0.937682	0.920414	0.926322	0.928841	0.930014
	1.3404	0.928284	0.89187	0.879463	0.896819	0.904513	0.913364	0.916898	0.922862	0.933522	0.950539	0.954621	0.946717	0.962815	0.956766	0.944582	0.957472	0.960103	0.974841	0.961635	0.968474	0.975385	0.981588	0.968425	0.96875	0.959043	0.951355	0.960682	0.968959	0.966599	0.964353	0.96173	0.956004	0.972308	0.963274	0.981137	0.957658	0.950031	0.961681	0.952062	0.948025	0.954326	0.948004	0.955804	0.921589	0.915031	0.911174	0.919685	0.921121
	1.34029	0.93	0.903902	0.891835	0.888669	0.8962	0.918275	0.921466	0.916354	0.930053	0.939815	0.944415	0.959502	0.964595	0.955941	0.943779	0.954281	0.967663	0.965089	0.961103	0.971963	0.975014	0.978325	0.950184	0.957539	0.960243	0.948837	0.948417	0.964149	0.969435	0.953654	0.953404	0.953024	0.970268	0.965324	0.958172	0.952867	0.949841	0.946078	0.942658	0.945205	0.951069	0.946998	0.951827	0.918432	0.909624	0.908301	0.923836	0.923147
	1.34017	0.932555	0.916345	0.900926	0.895149	0.898752	0.89878	0.908089	0.915011	0.919665	0.944093	0.948941	0.94581	0.953103	0.961054	0.943711	0.948782	0.950143	0.970697	0.9619	0.966452	0.989738	0.972122	0.955084	0.951094	0.955673	0.953207	0.951983	0.965239	0.963958	0.958486	0.956157	0.964867	0.97115	0.968002	0.955187	0.95339	0.945739	0.949908	0.950145	0.936642	0.942657	0.948919	0.937841	0.918991	0.903818	0.900517	0.925887	0.924528
	1.34006	0.946194	0.922643	0.903523	0.903367	0.89084	0.893473	0.905737	0.909539	0.920164	0.934579	0.942905	0.934069	0.954131	0.947891	0.945638	0.950394	0.958195	0.960977	0.963881	0.958372	0.975089	0.978371	0.961948	0.965116	0.952612	0.947401	0.956049	0.955972	0.957737	0.95431	0.948767	0.96625	0.967058	0.961443	0.962379	0.949985	0.939694	0.946149	0.939137	0.933767	0.946291	0.943932	0.937196	0.91988	0.899673	0.914058	0.93063	0.925822
	1.33995	0.948948	0.927574	0.902464	0.891284	0.899822	0.893869	0.894472	0.899255	0.92541	0.926439	0.943804	0.944511	0.940231	0.947646	0.935726	0.949145	0.948291	0.956677	0.9581	0.957947	0.972355	0.967153	0.961237	0.944278	0.947602	0.943706	0.950145	0.957534	0.949965	0.939064	0.959228	0.970356	0.962855	0.957089	0.955382	0.945038	0.935352	0.935846	0.938765	0.933379	0.936856	0.946581	0.926076	0.907392	0.906218	0.913326	0.932666	0.932948
	1.33984	0.959165	0.938574	0.917311	0.888677	0.897413	0.896262	0.895325	0.89322	0.911646	0.913363	0.935113	0.940487	0.947795	0.936058	0.951696	0.950886	0.96037	0.968787	0.964179	0.964053	0.975917	0.964784	0.942363	0.957031	0.94574	0.94897	0.943992	0.954855	0.956411	0.950781	0.943861	0.953822	0.952721	0.958497	0.955642	0.957065	0.940342	0.935692	0.921642	0.932838	0.92537	0.940167	0.934294	0.900459	0.890068	0.915809	0.930987	0.949808
	1.33973	0.965547	0.944512	0.930378	0.897348	0.898124	0.894108	0.8841	0.893669	0.903588	0.918081	0.931785	0.93415	0.93366	0.953274	0.932048	0.92576	0.953344	0.953049	0.960194	0.955302	0.982869	0.964083	0.942979	0.934896	0.953994	0.938476	0.943152	0.956581	0.957605	0.94077	0.958132	0.956608	0.957149	0.94777	0.953893	0.944327	0.936058	0.932581	0.930188	0.925571	0.933093	0.93013	0.912393	0.901644	0.903511	0.90274	0.940336	0.942883
	1.33961	0.981649	0.950297	0.921236	0.906087	0.908024	0.892723	0.879967	0.890726	0.897797	0.91103	0.914399	0.930057	0.941389	0.933221	0.934705	0.938868	0.954148	0.952287	0.956594	0.95282	0.962496	0.954916	0.951251	0.951482	0.955342	0.942643	0.936852	0.947085	0.951766	0.944263	0.946348	0.946823	0.9581	0.945192	0.951604	0.947048	0.937938	0.926029	0.925251	0.917068	0.921005	0.925737	0.915113	0.906461	0.912513	0.917576	0.933611	0.953943
	1.3395	0.968153	0.962953	0.93061	0.934039	0.915848	0.907286	0.883144	0.886276	0.888123	0.905071	0.913068	0.921557	0.927945	0.931219	0.928487	0.949166	0.952559	0.95	0.952169	0.948989	0.955788	0.961864	0.947562	0.95088	0.934038	0.934076	0.937101	0.95318	0.95265	0.946905	0.94169	0.94146	0.95386	0.940816	0.950043	0.945107	0.927041	0.922522	0.923454	0.913346	0.918839	0.920408	0.920269	0.913673	0.909959	0.934587	0.951437	0.954318
	1.33939	0.977099	0.959711	0.943463	0.93623	0.910788	0.902752	0.894953	0.896409	0.890741	0.90281	0.905882	0.914613	0.935701	0.931766	0.916691	0.932961	0.934252	0.95372	0.953375	0.962097	0.980044	0.972209	0.946295	0.946751	0.934643	0.938582	0.925248	0.943329	0.947881	0.933288	0.943917	0.943081	0.945119	0.944255	0.946009	0.932972	0.93772	0.921322	0.912781	0.910245	0.910041	0.911408	0.917592	0.901885	0.911349	0.928493	0.964126	0.97791
	1.33928	0.984193	0.958333	0.955817	0.938366	0.931702	0.914311	0.894927	0.885075	0.892744	0.897373	0.903633	0.911856	0.909091	0.932792	0.91441	0.931969	0.935009	0.952284	0.942719	0.951679	0.956361	0.958591	0.943856	0.943603	0.945447	0.931848	0.936719	0.937837	0.937592	0.932405	0.938462	0.942803	0.95112	0.945643	0.939946	0.939652	0.924328	0.928284	0.905995	0.901284	0.908354	0.917564	0.916007	0.922216	0.922434	0.943596	0.972881	0.986277
	1.33917	0.97732	0.968731	0.952313	0.949092	0.929793	0.927411	0.909773	0.891241	0.890176	0.892418	0.901456	0.895017	0.913606	0.926443	0.914518	0.921846	0.937984	0.942229	0.93653	0.954474	0.964728	0.952239	0.940881	0.936801	0.936703	0.929408	0.936088	0.943559	0.942615	0.933238	0.93282	0.936351	0.950079	0.939931	0.936429	0.925525	0.9203	0.904298	0.901611	0.892712	0.916105	0.913739	0.920554	0.910615	0.935891	0.957936	0.959739	0.97316
	1.33906	0.989371	0.96394	0.952771	0.950975	0.948724	0.936777	0.914468	0.904762	0.895677	0.900203	0.885983	0.8955	0.908303	0.922321	0.916146	0.910266	0.928383	0.940921	0.945272	0.946792	0.951219	0.951843	0.930804	0.943936	0.935113	0.921591	0.925146	0.955013	0.930574	0.929215	0.928695	0.93786	0.934295	0.927725	0.931307	0.922237	0.914408	0.894791	0.892352	0.889183	0.915185	0.924054	0.935775	0.926245	0.934014	0.957111	0.981303	0.976907
	1.33894	0.9987	0.975978	0.962691	0.959587	0.949774	0.932339	0.928571	0.918016	0.900574	0.905774	0.896388	0.890046	0.896515	0.900142	0.900352	0.914286	0.929093	0.935106	0.920543	0.942451	0.944018	0.96596	0.939411	0.937574	0.939989	0.931119	0.934845	0.939233	0.948761	0.93724	0.933557	0.933708	0.930394	0.917767	0.920954	0.914863	0.912933	0.909636	0.874227	0.89995	0.911194	0.923097	0.943418	0.937067	0.950448	0.965624	0.981268	0.987342
	1.33883	0.99201	0.979384	0.962439	0.963273	0.953105	0.951971	0.930732	0.922355	0.913704	0.906859	0.892304	0.895341	0.904689	0.904476	0.894082	0.910548	0.912324	0.925821	0.927073	0.932949	0.947977	0.951789	0.922946	0.927348	0.916256	0.907315	0.912972	0.929846	0.94478	0.926711	0.920941	0.928317	0.929875	0.924893	0.922296	0.909496	0.900385	0.891075	0.888178	0.900329	0.912614	0.940086	0.944329	0.956509	0.955126	0.958102	0.979185	0.991708
	1.33872	0.997856	0.970975	0.965874	0.96759	0.965534	0.949046	0.940009	0.935311	0.925532	0.909808	0.901082	0.892551	0.891326	0.894532	0.890307	0.892803	0.902742	0.907417	0.935342	0.925794	0.951141	0.947912	0.938626	0.930629	0.923035	0.907884	0.922251	0.937461	0.923855	0.929463	0.921437	0.920759	0.925214	0.91526	0.915603	0.901975	0.905911	0.905833	0.897282	0.90023	0.914794	0.950967	0.955331	0.964371	0.964227	0.978415	0.980623	1.00216
	1.33861	1.00096	0.981062	0.96588	0.967633	0.963409	0.953075	0.953986	0.940986	0.932735	0.917515	0.914147	0.90131	0.901423	0.890601	0.887953	0.901066	0.892086	0.902037	0.91553	0.920391	0.944584	0.935546	0.934145	0.926182	0.913493	0.906211	0.901886	0.925755	0.9217	0.911385	0.914484	0.92264	0.926656	0.909777	0.893491	0.894798	0.899425	0.909163	0.89697	0.907328	0.933316	0.960324	0.954885	0.960438	0.966292	0.971987	0.979765	0.997825
	1.3385	1.00193	0.977663	0.972367	0.976014	0.971047	0.961701	0.951445	0.944293	0.943249	0.935636	0.92326	0.904011	0.899975	0.898407	0.888328	0.88535	0.890811	0.897911	0.903742	0.911136	0.93181	0.937297	0.913134	0.910538	0.909139	0.900721	0.915074	0.911565	0.912592	0.901246	0.912233	0.900602	0.905655	0.910165	0.905865	0.902537	0.89592	0.892092	0.907332	0.914443	0.945362	0.960497	0.969651	0.961153	0.965187	0.97388	0.994534	0.984786
	1.33838	0.997356	0.975213	0.97838	0.975117	0.973122	0.967516	0.964082	0.955788	0.960764	0.937397	0.931217	0.913064	0.914214	0.909808	0.889249	0.888412	0.890647	0.902028	0.90446	0.903872	0.916102	0.93203	0.898933	0.915455	0.888718	0.893121	0.903256	0.906547	0.90854	0.897769	0.893498	0.901362	0.911793	0.897542	0.91323	0.910182	0.912183	0.905782	0.911663	0.93201	0.949099	0.965374	0.979689	0.96616	0.965919	0.991036	0.990883	1.00296
	1.33827	0.999283	0.972077	0.978444	0.975574	0.975486	0.971971	0.958815	0.95105	0.953886	0.951957	0.936787	0.93185	0.924387	0.90395	0.880373	0.893949	0.897131	0.903954	0.886954	0.894764	0.91623	0.923964	0.896654	0.902807	0.90286	0.895331	0.898745	0.91037	0.905379	0.889906	0.894737	0.896633	0.891456	0.904665	0.893592	0.898312	0.9148	0.918308	0.910132	0.937065	0.964147	0.999685	0.984486	0.960722	0.978976	0.987255	0.98794	0.998965
	1.33816	0.998525	0.979072	0.972068	0.983034	0.971766	0.975436	0.954114	0.967217	0.953149	0.950222	0.942971	0.936541	0.93427	0.917879	0.907822	0.897214	0.905899	0.899775	0.896214	0.893659	0.908662	0.905095	0.896912	0.880435	0.889562	0.871749	0.893151	0.885066	0.891175	0.888572	0.889779	0.887341	0.902516	0.899322	0.897037	0.933448	0.924944	0.934987	0.932967	0.947999	0.976546	0.983424	1.0018	0.97928	0.982154	0.986478	1.00227	0.995431
	1.33805	0.999748	0.990248	0.97761	0.974767	0.977332	0.971376	0.973603	0.957172	0.972253	0.965577	0.952173	0.94218	0.948961	0.927177	0.912783	0.912179	0.902469	0.905514	0.897712	0.892207	0.907575	0.900237	0.886415	0.884597	0.888889	0.883862	0.884025	0.88644	0.892792	0.887324	0.889609	0.891233	0.90304	0.911303	0.918657	0.921503	0.940519	0.93592	0.9354	0.954459	0.978348	0.991033	0.993994	0.981681	0.980431	0.989641	1.00068	1.00074
	1.33794	0.99127	0.979395	0.975322	0.985339	0.985238	0.981555	0.961466	0.966518	0.960354	0.968041	0.974718	0.952473	0.952581	0.943149	0.920829	0.915844	0.916169	0.904036	0.892459	0.892796	0.917329	0.906141	0.887026	0.880897	0.877932	0.881499	0.883095	0.892434	0.885208	0.89058	0.884786	0.896838	0.911076	0.909515	0.928979	0.937129	0.947256	0.962613	0.950575	0.961749	0.985244	0.973978	0.999618	0.981668	0.979557	0.990132	0.996745	1.00715
	1.33783	1.00052	0.994099	0.972546	0.968014	0.980373	0.982448	0.979352	0.967347	0.969037	0.973461	0.977363	0.968935	0.957253	0.942297	0.934798	0.924716	0.924189	0.925187	0.902845	0.898376	0.908984	0.902544	0.894737	0.878788	0.888603	0.895508	0.884077	0.89131	0.893296	0.883804	0.901528	0.897126	0.915246	0.924667	0.930217	0.942554	0.962781	0.966052	0.953435	0.975358	0.976115	0.987337	0.999223	0.986367	0.988116	0.996963	1.01357	0.991325
	1.33771	0.997948	0.982602	0.979236	0.983867	0.971909	0.980797	0.972377	0.978192	0.978281	0.974847	0.972721	0.975909	0.965945	0.961729	0.934907	0.931937	0.939996	0.933273	0.914992	0.908978	0.925839	0.912993	0.905998	0.896279	0.894604	0.877946	0.878197	0.90606	0.904844	0.896883	0.906174	0.923944	0.929037	0.93225	0.960479	0.958434	0.967594	0.965504	0.965681	0.969473	0.987468	1.00314	0.99844	0.981161	0.974054	0.994646	1.00271	1.00287
	1.3376	1.01319	0.974934	0.974195	0.979287	0.984084	0.981406	0.973424	0.973391	0.973849	0.980118	0.975689	0.975363	0.963356	0.964217	0.95776	0.955275	0.947136	0.945479	0.928223	0.922023	0.920868	0.926706	0.907995	0.903603	0.902428	0.90312	0.907232	0.902642	0.899976	0.903026	0.913464	0.9331	0.929627	0.940717	0.96062	0.960027	0.969402	0.963824	0.962427	0.97177	0.994386	0.999657	0.998825	0.986827	0.984627	0.989571	1.00708	0.998751
	1.33749	1.00667	0.991498	0.987462	0.974097	0.986826	0.982092	0.980945	0.975108	0.979518	0.972826	0.984774	0.986367	0.977862	0.970482	0.949512	0.949219	0.9517	0.95405	0.94721	0.923401	0.942399	0.931782	0.93384	0.914864	0.900956	0.909669	0.907271	0.910981	0.916605	0.919	0.92518	0.932674	0.93772	0.959456	0.965507	0.968803	0.970463	0.979352	0.965887	0.983343	0.985597	1.00299	1.01233	0.981569	0.988218	0.997651	1.01693	1.00859
	1.33738	0.993773	0.984015	0.968869	0.985352	0.983248	0.975909	0.974647	0.978814	0.993119	0.967672	0.981898	0.977673	0.974583	0.957529	0.957105	0.961649	0.958541	0.969476	0.941495	0.940827	0.952083	0.955241	0.935972	0.929702	0.915041	0.922999	0.907349	0.921991	0.934013	0.92206	0.937616	0.951911	0.958415	0.956475	0.980277	0.971523	0.97338	0.978268	0.97177	0.982703	0.99103	1.01094	0.99776	0.990512	0.981481	1.01215	1.00961	1.01117
	1.33727	1.00428	0.991334	0.978571	0.992614	0.997804	0.987161	0.978797	0.977722	0.987646	0.990079	0.986676	0.982801	0.987818	0.972875	0.960784	0.955458	0.960503	0.955809	0.959604	0.957757	0.963907	0.960048	0.933034	0.938861	0.935596	0.922661	0.930109	0.929521	0.936397	0.936078	0.941643	0.956728	0.968098	0.968801	0.978591	0.991287	0.973277	0.981749	0.980969	0.983191	0.98742	0.998825	1.01035	0.982882	0.990179	0.994617	1.00438	1.00216
	1.33716	0.996819	0.986359	0.979426	0.980292	0.972498	0.986111	0.97465	0.97483	0.984361	0.988584	0.990083	0.975137	0.986494	0.982525	0.966106	0.964038	0.972727	0.974248	0.957123	0.961216	0.975039	0.958522	0.961698	0.958885	0.94365	0.932836	0.932217	0.94877	0.950828	0.948992	0.949682	0.970882	0.96972	0.970811	0.986826	0.972884	0.969972	0.971997	0.975731	0.985729	0.987189	0.999165	1.02679	1.00269	0.999663	0.998527	1.0073	0.996198
	1.33705	1.00641	0.992498	0.986475	0.991348	0.986382	0.989482	0.97913	0.982155	0.980433	0.981395	0.999053	0.989036	0.987936	0.98235	0.978104	0.966008	0.978005	0.980359	0.962974	0.976695	0.976656	0.969205	0.960545	0.958494	0.950286	0.932931	0.945911	0.951913	0.94944	0.954251	0.959297	0.967546	0.973309	0.985241	0.982021	0.984074	0.986033	0.973978	0.981606	0.987777	0.985115	1.0059	1.00186	0.989956	0.99563	0.993785	1.01187	0.990767
	1.33693	0.999196	0.991927	0.978999	0.988483	0.987541	0.981965	0.990281	0.979985	0.98341	0.986721	0.993745	0.990037	0.987193	0.990423	0.976073	0.972011	0.978767	0.982143	0.970136	0.972111	0.98507	0.980186	0.975541	0.966586	0.953798	0.943403	0.938603	0.959698	0.966369	0.955933	0.967766	0.974148	0.979183	0.983504	0.988156	0.98512	0.986277	0.983373	0.97961	0.967119	1.00195	0.994178	1.00778	1.00122	0.997045	0.992905	1.00505	0.996569
	1.33682	1.0011	0.979361	0.98829	0.991523	0.984149	0.978645	0.98581	0.980036	0.983013	0.98257	0.995365	0.98392	0.986964	0.983231	0.972277	0.969433	0.990374	0.981823	0.9777	0.973929	0.98515	0.979342	0.977208	0.953262	0.955405	0.948585	0.952562	0.958037	0.963565	0.960746	0.971054	0.966755	0.982524	0.99203	0.987245	0.972059	0.986851	0.988336	0.973954	0.989431	0.993386	1.00951	1.01402	0.998792	0.99346	0.996678	1.00887	1.01114
	1.33671	1.01302	0.979665	0.986194	0.985574	0.982783	0.979877	0.99533	1.0034	0.998951	0.998527	0.991921	0.993491	0.990088	0.986579	0.980417	0.980942	0.988767	0.988311	0.982132	0.981392	0.99129	0.980367	0.964491	0.958087	0.970279	0.960812	0.961803	0.966181	0.967621	0.976761	0.961943	0.980691	0.978048	0.987338	1.00422	0.985881	0.988222	0.985435	0.970757	0.986094	1.00124	1.0183	1.00185	0.996369	0.999427	0.9988	1.01656	1.00245
	1.3366	1.00032	0.991977	0.986826	0.988686	0.985888	0.979921	0.972524	0.980488	0.986818	0.992664	0.974735	0.989127	0.997666	0.988838	0.985923	0.981955	0.986502	0.995037	0.97036	0.981397	1.00742	0.989783	0.963052	0.952031	0.963458	0.963592	0.957613	0.978636	0.970964	0.964804	0.976598	0.980014	0.974895	1.00493	0.992303	0.996514	0.987541	0.992837	0.982531	1.00207	1.0112	1.01109	1.00461	1.00366	0.993707	0.993954	1.01187	1.00573
	1.33649	0.99562	0.995451	0.989737	0.983692	0.984879	0.982405	0.990468	0.990785	1.00129	0.998501	0.983407	0.993852	0.990887	0.990746	0.980745	0.982232	0.992198	0.985721	0.988112	0.981283	1.00127	1.00639	0.985984	0.964799	0.949259	0.962526	0.962752	0.980382	0.974386	0.974545	0.966751	0.98409	0.981268	0.982385	1.00033	0.995387	0.991018	0.991422	0.976272	0.983255	1.00076	1.01401	1.00434	0.996943	0.994772	1.0134	1.01017	1.01532
	1.33638	1.00173	0.992106	0.98337	0.992595	0.991495	0.980695	0.994944	0.969641	0.986416	0.979556	0.982148	0.994723	0.999681	0.994959	0.975507	0.995149	0.986354	0.998725	0.986737	0.983932	1.00099	0.993139	0.981196	0.984653	0.977982	0.96682	0.966134	0.98858	0.982982	0.982328	0.976221	0.983822	0.997033	0.99853	0.998647	0.993537	0.990623	0.992427	0.990551	0.994318	1.01036	1.00961	1.00609	0.998458	0.98514	1.00031	1.00312	1.00067
	1.33627	1.00455	0.990274	0.993628	0.986014	1.00428	0.996064	0.984697	0.982947	0.999462	0.990556	0.989056	0.995346	1.00094	0.99968	0.978887	0.986464	0.990142	0.997751	0.991762	0.994064	1.00428	0.99651	0.984519	0.982613	0.972838	0.966144	0.975671	0.987654	0.984561	0.985682	0.97885	0.989372	0.981794	0.992057	0.990645	1	0.995485	0.987069	0.985253	0.990644	1.00235	1.01524	0.996451	1.00157	0.99911	1	1.00475	0.99865
	1.33616	1.00431	0.990863	0.981248	0.980851	0.992091	0.996337	0.978887	0.983146	0.995826	0.990814	0.996354	0.989257	1.00322	0.98535	0.993425	0.984996	0.991091	0.996526	0.989267	0.998072	0.991661	0.984869	0.98268	0.969168	0.963956	0.968583	0.970036	0.989145	0.983157	0.991133	0.976124	0.990702	0.983015	0.990743	1.00236	0.991088	0.997301	0.994449	0.985159	0.992169	1.0065	1.00199	1.01918	0.998722	0.996372	1.00031	1.01093	0.997945
	1.33604	1.00699	0.983465	0.985742	0.988306	0.978976	0.982515	0.979791	0.989241	0.992754	0.995082	0.996901	0.99851	0.992397	0.991095	0.988496	0.984891	0.99742	0.981926	0.984375	0.99259	1.00099	0.993827	0.982314	0.982796	0.969609	0.963333	0.964521	0.984115	0.982815	0.979001	0.977447	0.990847	0.9904	0.996182	1.00202	1.00706	0.984375	0.9929	0.998403	1.00137	0.998947	1.00689	1.01391	0.994537	1.0028	1.00597	1.00776	0.997599
	1.33593	1.02336	0.994521	0.986033	0.990955	0.98895	0.98162	0.994471	0.988608	0.991458	0.997644	0.997358	0.992031	0.994264	0.997259	0.988717	0.988142	0.989239	1.0021	0.984704	0.995651	1.00599	1.00633	0.995471	0.981809	0.972472	0.977742	0.972283	0.98887	0.989668	0.971037	0.976627	0.98311	1.00444	0.994682	1.00507	0.994915	0.994147	0.995116	0.983177	0.987865	1.00054	1.01441	1.015	0.994888	1.0034	1.01107	1.01953	1.00593
	1.33582	1.00261	0.989575	0.997171	0.982893	0.981533	0.990069	0.994382	0.994104	0.992152	0.99619	1.00543	0.994322	1.00209	1.0021	0.992392	0.992548	0.991148	0.99395	0.987491	0.98219	0.993728	1.0015	0.989496	0.961498	0.968457	0.967423	0.997275	0.984064	0.982985	0.986062	0.983585	0.996182	1.0049	0.996532	0.999311	1.00036	0.990004	0.995822	0.993458	0.996388	1.0008	1.01383	1.00837	0.997051	0.996613	1.00921	1.00438	1.00791
	1.33571	1.00375	0.99809	0.982072	0.995485	0.989839	0.999307	0.987737	0.983903	0.993058	0.993614	0.996328	0.999667	0.989369	1.00751	0.976865	0.983209	0.999446	1.00549	0.983877	0.983888	1.01298	1.01939	0.978199	0.978642	0.967613	0.972245	0.9759	0.986364	0.987468	0.973543	0.98044	0.990541	0.997458	0.994725	0.998964	0.997047	0.989172	0.997393	0.989546	0.994139	1.0113	1.01475	1.01052	0.997346	0.992136	1.00876	1.01335	0.994949
	1.3356	1.00715	0.992154	0.98746	0.985052	1.00351	0.993735	0.9982	0.998657	0.98309	0.998042	1.00138	1.00537	1.00733	0.985584	0.972462	0.995949	0.987595	0.996852	0.993301	0.990553	1.0065	0.99422	0.986817	0.982434	0.968698	0.974615	0.986165	0.991669	0.973019	0.987191	0.985685	0.983904	0.994369	0.994081	0.997929	1	0.999208	0.996182	0.976623	0.993803	1.008	1.00849	1.01789	0.994067	0.999364	0.99143	1.00641	1.01258
	1.33549	1.02038	0.983587	0.977044	0.978372	0.98416	0.984578	0.977208	0.985005	0.991074	1.00851	0.993464	0.997121	1.00039	0.994473	0.977801	0.99133	1.00942	1.00729	0.986577	1.00142	1.00904	1.01928	0.983062	0.98248	0.973122	0.983915	0.979385	0.974141	0.988945	0.989057	0.988947	0.990492	1.00328	0.9875	1.00035	1.0053	0.994438	0.990812	0.9921	0.999436	1.00412	1.01044	1.0146	0.995316	0.995214	0.997037	1.01405	1
	1.33538	1.01179	1	0.981989	0.980444	0.987522	0.981526	0.99964	0.993723	0.9917	0.99611	1.00521	1.0011	0.997172	0.98998	0.996768	0.992405	1.00242	1.0013	1.00114	0.993156	1.00909	0.988263	0.988079	0.978709	0.979644	0.961095	0.994156	0.983427	0.98998	0.970653	0.973208	0.99126	1.00295	0.998307	1.00543	0.994593	1.00726	0.996887	0.983784	0.997071	1.01752	1.02203	1.01066	0.984202	1	0.999334	1.01156	1.00818
	1.33527	1.00111	0.997327	0.981255	0.986782	0.989753	0.992517	0.990466	0.980169	0.97655	1.00195	0.984348	0.9883	1.00524	0.99105	0.981548	0.983166	0.993344	1.00138	0.986781	0.994156	1.02317	1.0131	0.988008	1.00069	0.97707	0.983168	0.992641	1.00394	0.988976	0.992285	0.976199	0.982807	1.00643	1.00681	0.999225	0.99756	1.00527	0.992675	0.988525	1.00268	1.00494	1.00989	1.01718	1.00271	0.995396	1.00414	1.01362	1.01199
	1.33516	1.00356	0.992023	0.999206	0.981832	0.984288	0.983305	0.988087	0.991231	0.992635	0.993993	1.0007	0.983242	0.99045	0.999591	0.980421	0.983665	0.995456	1	0.993949	0.995891	0.991323	0.999411	0.999329	0.979917	0.98722	0.966152	0.974777	0.983193	0.99166	0.987202	0.993821	0.985303	0.998196	1.00441	1.00751	1.01204	1	0.997623	0.989164	0.99187	1.01199	1.0268	1.01942	1.00103	0.996089	0.996565	1.00804	1.00111
	1.33504	1.00796	0.991274	1.00499	0.981765	0.997942	0.985572	0.990466	0.984242	0.991368	1.00161	0.992039	0.987027	1.00981	1.00458	0.985792	0.989069	1.00066	0.983339	0.985857	1.00467	1.01153	1.00616	0.990404	0.985765	0.978346	0.981351	0.984885	0.989053	0.992647	0.983273	0.978284	0.999364	1.00793	0.99373	1.00883	1.0014	1.00819	0.991663	0.985709	0.996658	1.00726	1.01026	1.01609	0.992207	0.991616	0.987066	1.00811	1.01063
	1.33493	1.01188	0.980301	0.984133	0.984741	0.991127	0.993758	0.999306	0.980098	0.994578	0.987828	1.0076	1.00107	1.00238	0.993475	1.00431	0.987084	0.994389	1.00547	0.988026	1.00944	1.01722	0.998764	0.967123	0.984375	0.974675	0.952976	0.976975	0.985393	0.97883	0.974766	0.979964	0.985823	0.994817	0.993856	1.00393	1.00145	1.00099	1.01254	0.99177	0.995607	0.997895	1.01344	1.00038	0.993771	0.995909	1.01121	1.01098	0.997347
	1.33482	1.00441	0.991503	0.9982	0.981924	0.985806	0.993943	0.990847	0.984785	0.98559	1	0.998954	0.997825	0.996494	1.0012	0.992377	0.994622	0.989576	0.997811	0.997504	0.998064	1.01333	1.00378	0.989576	0.986966	0.971932	0.982161	0.975502	0.990262	0.991781	0.988368	0.996307	0.999665	1.0082	1.00488	1.01064	0.999032	0.995342	0.993952	0.994567	1.00374	1.02213	1.02041	1.0137	1.00152	0.999286	1.00817	1.01665	1.01234
	1.33471	1.01235	0.991071	0.986408	0.989839	0.999048	0.988683	0.991738	1.00031	0.989515	1.00099	1.00465	0.998526	1.00759	1	0.994	0.990491	0.997484	1.00036	0.993021	1.00805	1.01403	1.00188	0.977194	0.993483	0.971803	0.991778	1.00123	0.998478	0.972931	0.976864	0.990853	0.983001	1.00747	1.00215	1.00915	1.00497	0.995378	0.99898	0.981619	0.98694	1.01868	1.02733	1.00985	0.998483	1.01233	0.998884	1.01077	1.00582
	1.3346	1.00679	0.992842	0.987138	0.984157	0.996371	0.997284	0.989049	0.988228	0.993667	0.996162	0.988388	1.01223	1.00477	1.00316	0.981305	0.995536	0.999704	1.00725	1.00081	1.00261	1.0082	1.00432	0.988404	0.991465	0.984147	0.973313	0.983085	0.988584	0.990959	0.995194	0.996684	0.987276	0.999215	1	1.01142	0.984318	0.993243	0.992545	0.99206	0.98888	1.012	1.01899	1.00081	1.00733	0.998199	1.00113	1.00562	1.0116
	1.33449	1.01218	0.980314	0.983317	0.995092	0.984407	0.992692	0.979381	0.994099	1.00217	1.00648	0.992774	1.0142	0.999207	1.0004	0.979861	0.996397	1.00058	1.00368	0.995343	1.00514	1.01605	0.998155	0.994543	0.992366	0.97673	0.981845	0.974338	0.987452	1.00202	0.984815	0.981818	0.994326	1.00552	1.00659	1.0178	0.995657	1	0.994347	0.993447	0.994242	0.998443	1.00292	1.00851	0.988353	0.998112	0.999237	1.02612	1.01383
	1.33438	1.0026	0.984214	0.976715	0.989932	0.986201	0.996669	0.985252	0.989819	0.986037	0.993185	1.00395	1.0053	0.999616	0.996104	0.989973	1.0006	1.0092	1.00846	0.982944	1.0045	1.0149	0.991672	0.980443	0.98711	0.992643	0.977177	0.969483	0.987537	0.996854	0.99479	0.982994	0.995327	1.00627	0.989073	0.998996	1.00759	0.996018	0.982888	0.996459	1.00038	1.00272	1.02188	1.02451	0.991312	0.996871	1.00155	1.0124	1.01144
	1.33427	1.00885	0.997546	0.991011	0.983819	0.989679	0.98501	0.988433	0.986188	0.995099	0.990759	0.999682	0.998618	0.995517	0.988675	1.00604	0.990763	1.02059	1.01704	0.988561	1.00633	1.00852	1.02039	0.984137	0.992686	0.993243	0.984252	0.985481	0.992997	1.00077	0.990207	0.993974	1.00034	0.995305	0.998667	1.01106	1.0011	1.0052	0.997785	1.00759	1.00395	1.00078	1.02141	1.00293	1.01229	1	1.00414	0.999226	1.00412
	1.33416	1.00353	0.991926	0.987552	0.981754	0.994152	0.990751	0.987209	0.984665	0.998354	0.98829	1.0049	1.02153	1.00752	0.995677	0.991117	0.998542	1.0075	0.990218	0.999632	1.0033	1.01642	0.988942	0.990208	0.994812	0.982384	0.968129	0.994165	0.995895	0.995971	0.975895	0.989679	0.991263	1.01142	0.995624	1.00199	1.00484	0.993746	0.99673	0.97999	1.00209	1.02021	1.00563	1.02573	0.995667	0.994235	1.01372	1.0177	1.00689
	1.33405	1.0003	0.98908	0.989162	0.994023	0.97933	0.983092	0.988326	0.996791	0.995441	0.991795	1.00058	0.997474	1.00101	0.99046	0.992975	0.996134	1.00431	0.992612	0.995339	0.995719	1	1.01513	0.995928	0.994451	0.983717	0.983228	0.979614	0.99312	1.00179	0.9941	0.98497	1.01355	0.996875	1.00518	0.988648	0.997868	1.00113	1.01375	0.985769	0.988439	1.01666	1.02554	1.01529	1.00619	1.00639	0.995318	1.00136	1.01516
	1.33394	0.998207	0.983448	0.991806	0.996315	0.988055	0.994393	0.993967	0.985329	1.00054	1.01111	1.00548	1.00826	1.00763	0.989531	0.983646	0.989951	1	1.01169	1.00427	1.00233	1.0192	1.00797	0.993503	0.983193	0.97969	0.985249	0.974377	0.992353	0.991055	0.98656	0.990906	0.995426	1.00312	0.995228	1.0152	0.994638	0.993707	0.995553	1.00048	0.993372	1.00657	1.02353	1.01492	1	0.995442	1.00721	1.02616	1.00404
	1.33382	1.0091	0.985475	0.989166	0.97986	0.994502	0.998569	1.00376	1.00027	0.990696	0.989071	1.00168	0.997051	1.00161	0.996679	1	0.982926	0.99261	1.00812	1.00204	1	1.00647	1.00373	0.993007	0.977907	0.984864	0.97262	0.976705	0.988491	0.994784	0.98522	0.979078	0.99493	0.987881	1.00586	1.01465	0.993517	0.983551	1.00388	0.996154	0.988017	1.00908	1.01933	1.01279	1.00893	0.985368	1.00875	1.01747	0.994201
	1.33371	1.00157	0.982876	0.99833	0.990464	0.995915	0.98677	0.979039	0.992871	1.00082	0.997643	1.00764	0.998527	1.00065	0.992659	0.990954	0.998134	0.994226	1.01014	1.00988	1.00553	1.02221	1.00697	0.983343	0.996433	0.984	0.979708	0.98961	0.98825	0.985205	0.986692	0.982564	1.00281	1.0073	0.997565	0.99425	1.00829	1.0035	0.991175	1.00048	1.00417	1.01406	1.01669	1.00968	1.00555	0.993272	0.991142	1.01737	0.998413
	1.3336	1.01354	0.986265	0.985095	0.993409	0.983125	0.985357	0.985172	1.00195	1.00056	1.00406	0.992308	0.994364	1.00195	0.998999	0.988873	0.994149	0.999738	0.996786	0.99396	1.00387	1.02081	1.00901	0.981276	0.980132	0.973853	0.981715	0.989464	0.990817	0.988555	0.998746	1.00293	0.995483	1.00431	0.997601	1.01191	0.993169	0.998271	0.994493	0.996646	0.990488	1.01673	1.02587	1.00878	0.998995	0.992126	1.00256	1.00252	1.00485
	1.33349	1.00546	0.990946	0.987543	0.977345	0.997924	0.99509	0.988663	0.981538	1.00057	0.988844	0.998255	0.996677	1.0069	0.997645	0.992548	0.985577	1.00852	1.00473	0.998665	0.996493	1.00625	1.00457	0.990783	0.986795	0.979504	0.97545	0.999352	0.998146	1	0.986618	1.00125	0.992459	1.00742	1.00966	1.00365	0.998996	1.00499	0.998896	0.987494	1.00337	1.01625	1.0217	1.01029	1.00854	0.993151	1.01442	1.02305	1.02835
	1.33338	1.01321	0.996898	0.980565	0.984211	0.988131	0.992483	0.988981	0.991497	0.9911	0.99944	1.00267	0.995655	1.00067	1.00716	0.989445	0.99313	1.00298	1.00664	0.995261	0.996124	1.01694	0.988855	1	0.995244	0.970915	0.977556	0.981639	0.994077	0.997355	0.982675	0.987326	0.990311	1.00947	0.9988	1.00857	0.999506	0.998394	0.991393	0.991275	0.986377	1.01223	1.01764	1.01968	0.99587	1.00499	1.00316	0.998925	1.01039
	1.33327	1.01861	0.986231	0.981065	0.988426	0.997529	1.00244	0.991398	0.990305	0.999711	1.00168	1.0006	1.01301	1.00412	0.995209	0.982186	0.994773	1.00083	1	0.998287	0.996758	1.00664	1.00573	0.990291	0.996424	0.972237	0.966199	0.988293	0.989434	0.989631	0.975799	0.987882	1.00581	0.993291	1.00565	1.02123	0.9976	0.993212	1.00157	0.992634	1.01413	1.01399	1.02066	1.01764	1.01284	1	0.997349	1.01892	1.00172
	1.33316	1.00469	0.992673	0.980541	0.990955	0.988546	0.990105	0.987074	0.989446	0.993845	0.988065	0.9884	0.994553	1.00567	0.992632	0.983551	0.988132	0.997766	1.00709	0.994402	1.00099	1.01222	0.997371	0.997083	1.00121	0.980718	0.978243	0.975155	1.00159	0.994413	0.99878	0.984127	1.00504	1.00698	1	1.00257	0.999516	1.00519	1.00307	1.00627	1.00747	1.00912	1.01795	1.01973	0.988775	1.00152	1.00481	1.01143	0.998269
	1.33305	1.01202	0.995442	1.00036	0.9976	0.986504	0.995048	0.985947	0.988341	0.993393	0.993625	1.00151	0.998397	1.00107	0.989568	0.981404	1.00143	1	1.01113	1.00813	0.997285	1.01518	0.997286	0.988187	0.985194	0.986644	0.977476	0.994343	0.990542	0.991033	0.986184	0.982875	0.995538	0.999668	1.00648	1.0142	1.00047	1.00254	1.00692	1.00619	0.999623	1.01836	1.02969	0.989765	0.993798	1.00461	1.01523	1.02676	1.01189
	1.33294	1.02109	0.987094	0.973694	0.989875	0.995171	0.993732	0.991324	0.991554	0.996084	0.999413	0.99969	1.00326	1.0036	1.0069	0.991972	0.990751	1.00604	1.02506	1.00072	1.0079	1.01699	0.999454	0.978055	0.98948	0.970067	0.97382	0.980088	1.00987	0.976494	0.9763	0.99752	1.01454	0.999667	1.00036	1.00698	0.9991	0.992747	0.995692	0.993835	0.991754	1.01315	1.01292	1.02909	0.990365	1.0041	1.00325	1.00935	0.987074
	1.33283	1.01059	0.98947	0.990511	0.977929	0.993833	1.00127	0.996415	0.989936	0.992133	0.993466	0.995261	1.00599	1.00872	0.992934	0.996069	1.00503	0.991597	1.00261	0.99817	1.00919	1.01922	1.00224	0.999387	0.992448	0.971894	0.984749	0.997567	0.989268	1.00507	0.981589	0.983172	1.00661	1.01167	0.996643	1.01795	0.998218	0.996652	1.00671	0.989192	0.997357	1.02126	1.01837	1.00394	1.00687	0.996486	1.01274	1.00845	1.00909
	1.33272	1.00447	0.986448	0.995247	0.992879	0.97619	0.996561	0.988979	0.990934	1.00429	1.00656	0.987187	1.01466	1.01031	0.994766	1.00332	0.996739	1.00379	1.00097	0.999262	1.00247	1.00086	1.00737	0.99197	1	0.9937	0.979727	0.984011	0.995369	0.987915	0.988416	0.989975	1.00028	1.00949	1	0.989139	1.00316	0.999058	1.00184	0.987216	0.99444	1.00591	1.00173	1.01101	1	0.996604	1.00484	1.01681	1.02253
	1.33261	1.01152	0.993847	0.993331	0.984236	1.01115	0.999057	0.999352	1.00307	0.99326	1.00966	1.00032	1.00608	1.01467	0.996266	1.00269	0.992171	0.992255	0.997	0.996648	0.998931	1.00307	1.01099	0.991077	0.987614	0.988399	0.977605	0.973966	0.99154	0.985028	0.99106	0.989162	1.00232	1.0024	1.00224	1.01231	0.998177	0.984345	1.00138	0.993535	0.997462	1.01371	1.0048	1.01109	1.01794	0.998081	0.999477	1.01282	1.01234
	1.3325	1.00902	0.986296	0.982817	0.997911	0.989477	0.991285	0.983992	0.991489	0.997537	0.99281	1.0013	0.993939	0.998896	0.990706	0.991284	1.00091	1.00452	1.01594	0.996601	1.01994	1.00438	0.990894	0.994253	0.987549	0.982153	0.983554	0.986477	1.0024	0.993967	0.979837	0.98506	1.00982	1.0014	1.00644	1.00939	1.00879	0.991764	0.989815	0.986334	1.0043	1.0108	1.02131	1.01602	0.990444	1.00536	0.99489	1.00983	1.01592
	1.33239	0.996171	0.988917	0.987528	0.989853	0.987813	0.982577	1.00133	0.987466	0.991968	0.998786	0.998387	1.01175	1.00447	1.00869	0.987082	0.99789	1.00534	1.01488	1.00301	1.00506	1.01223	0.995984	0.986607	0.989501	0.989976	0.985546	0.99453	0.982218	0.987748	0.998668	0.983692	0.996686	1.01002	1.00348	1.01701	1.00563	1.0085	1.00187	0.993574	1.00541	1.00599	1.00877	1.01011	0.992449	0.99613	1.00988	1.01937	1.01565
	1.33228	0.997194	0.989781	0.983276	0.998219	0.988583	0.98471	0.983551	0.992417	0.98375	0.991443	1.00686	1.0101	1.00113	1.01003	0.997949	1.00278	1.0006	1.01223	1.00536	1.00403	1.02077	1.01536	1.00192	0.987467	0.984661	0.985561	0.979645	1.0036	0.989083	0.983898	0.975198	1.0037	1.00219	0.994043	1.01501	1.00337	1.00498	0.993922	1.00247	1.00434	1.01949	1.01967	0.994982	0.992023	1.00777	0.98593	1.01198	1.02257
	1.33216	1.01166	0.98655	1.00191	0.991896	0.997639	0.99217	0.979714	0.992222	0.992096	0.993344	1.00599	0.9969	0.993296	0.997315	0.980743	1.00062	0.987959	0.995333	1.00263	1.00182	1.01673	1.01172	1.00064	0.99934	0.977778	0.977304	0.969168	0.994955	0.988914	0.992193	0.986636	0.995985	1.00961	1.00202	1.02157	1.01623	0.991504	1	1.00041	1.00287	1.02134	1.01981	1.01412	0.993846	0.994395	1.00759	1.01612	1.00965
	1.33205	1.00332	0.993514	0.988924	0.987699	0.982058	0.989305	1.00103	0.996173	0.99447	1.00032	0.997584	1.00536	1.00625	0.983966	1.00174	1.00536	0.992962	0.993797	1.00384	1.00589	1.01048	1.01079	1.01384	0.995333	0.982036	0.975474	0.999621	0.990962	0.994279	0.991053	0.991792	1.00032	1.00941	1.00291	1.01638	1.00705	0.985604	0.99021	0.979253	1.00257	1.0174	1.02928	1.01112	1.00218	0.990679	1.01115	1.00866	1.00705
	1.33194	1.00154	0.997179	0.984362	0.994133	0.992291	0.994956	0.979739	0.990702	0.988274	1.00032	1.00476	1.00294	0.998816	0.997588	0.993695	1.00191	1.00314	1.01125	0.99687	1.00981	1.03053	1.00909	0.996078	0.997308	0.985419	0.998561	0.989537	0.999274	0.987121	0.995081	0.994797	0.994257	1.01842	1.01336	1	1.00611	0.995767	0.994508	0.994852	0.99963	1.00432	1.01167	1.02383	1.00616	1.01544	1.01155	1.02259	1.00502
	1.33183	0.997977	0.976522	0.986597	0.992416	0.98896	0.989521	0.989639	1	0.995429	1.00292	0.98968	1.00073	1.0053	0.999576	1.00296	0.987021	1.00514	0.998224	1.00674	1.00497	1.01581	1.00677	1.02068	0.99381	0.994438	0.968589	0.993111	0.989996	0.979901	0.995375	0.997505	1.01548	1.00886	1.01142	1.00471	1.0119	1.00161	1.00154	0.991189	1.00375	1.00911	1.01094	1.00317	1.00851	1.00174	1.02206	1.0239	0.997916
	1.33172	1.01226	0.9973	0.980838	1.0004	1.00302	0.986277	0.984	0.988937	0.982661	0.998354	0.998953	1.01214	0.998362	1.00604	0.993769	0.993691	1.00165	1.01556	1.0008	1.00544	1.00807	1.01255	0.98929	0.9875	0.968673	0.978968	0.994563	1.00905	0.989325	0.992537	0.993136	1.00264	1.01617	1.01112	1.01219	1.01538	0.998338	1.00262	0.995979	1.01436	1.0149	1.03117	1.01397	0.99729	0.996474	1.01145	1.01312	1.01424
	1.33161	1.00955	1.00234	0.983059	0.988916	0.998813	0.995455	0.973408	0.983679	0.997586	1.00102	1.0057	0.998535	0.993993	0.994188	0.999223	1.0022	1.00671	1.01429	1.00206	1.01492	1.0229	1.00502	0.986367	0.997915	0.97818	0.975845	0.990208	0.995116	0.989683	0.990029	0.993197	1.00928	1.00511	1.00345	1.01372	1.01056	1.00385	1.00158	0.998203	1.0129	1.02772	1.01626	1.00418	0.999551	0.99216	0.985799	1.01934	1.02276
	1.3315	1.00264	0.984004	0.997522	0.993016	0.980408	0.987215	0.992727	0.981858	1.00214	0.99897	1.00146	0.999243	1.00699	1.00419	1.00425	0.998529	0.996309	1.00285	0.994732	1.01317	1.00299	0.998084	0.992455	0.987041	0.984645	0.971866	0.982819	0.995843	1.00197	0.98363	0.984121	0.998664	1.01122	1.00483	1.01058	1.01627	1.02561	0.98984	0.991781	0.993235	1.00155	1.01062	1.00188	1.00593	0.997344	0.997692	1.00529	1
	1.33139	1.01129	0.992218	0.994811	0.992944	0.990213	0.985087	0.985833	0.986538	0.987814	0.997196	1.0015	1.00931	0.998728	1.00171	0.989734	1.00645	1.00362	1.00706	1.00649	1.00343	1.02514	1.01962	1.01064	1.01169	0.9892	0.994456	0.985194	1	0.995276	0.987654	0.999628	1.00508	1.00079	0.995178	1.01048	0.996714	1.00226	1.00108	1	1.00487	1.01139	1.01304	1.00629	0.9954	0.995459	1.00512	1.01051	1.01862
	1.33128	1.00132	0.991408	0.983232	1.00097	0.990884	0.994463	0.99748	1.00158	0.997606	0.99176	1	1.00198	1.00481	0.996444	0.997681	1.00106	1.0014	1.01721	1.00048	0.99411	1.015	1.00336	0.992193	0.985476	0.985788	0.996369	0.988081	0.991406	0.99282	0.985789	0.990573	1.01408	1.0016	1.00758	1.00543	0.991781	1.01733	0.995645	0.988822	0.999184	0.999208	1.01714	1.00536	0.994369	0.993984	1.00381	1.01335	1.0155
	1.33117	1.01247	0.99264	0.98049	0.988615	0.988235	0.987843	0.996419	1.01053	0.989916	1.00284	1.00512	0.990917	1.00233	0.990038	0.992768	0.99607	0.991444	1.0012	0.981167	1.00514	1.01106	1.02235	1.00603	0.992302	0.991234	0.975828	0.97827	1.00168	0.992516	0.993626	1.00382	0.993068	1.01003	1.01315	1.00152	1.01614	1.0129	1.00668	0.989479	0.99917	1.02072	1.00761	1.00858	1.00576	1.00237	1.01833	1.00499	1.00053
	1.33106	1.01179	0.993357	0.986822	0.993362	0.998614	0.99865	0.998116	1.00476	0.99738	1.00815	0.997767	1.00668	1.01167	0.995996	0.996665	0.986652	0.997436	1.00124	0.996726	1.0123	1.01587	1.01722	1	0.992794	0.982118	0.983261	0.988476	0.995748	0.994384	0.984487	1	1.00456	1.00251	1.01753	1.00816	1.01333	1.00115	0.996652	0.99759	1.0038	1.01308	1.01307	1.02506	0.988995	0.992954	1.01656	1.01595	1.0181
	1.33095	0.998951	0.99071	0.983554	0.985444	0.987649	0.992428	0.993874	0.997297	1	0.985765	0.997284	1.01405	0.979624	1.00589	0.995673	0.992447	0.996526	0.995663	0.997549	0.998628	1.01293	1.00819	0.988992	0.977891	0.99631	0.983579	0.981639	0.992612	0.985533	0.986111	0.991696	1.00396	1.00213	0.995824	1.01579	1.02152	1.00843	1.00866	1.00099	0.99655	1.0169	1.01435	1.01255	0.991687	0.997083	0.997993	1.01162	1.00113
	1.33084	0.995226	0.988713	0.981533	0.987903	0.985012	0.987849	0.973832	0.988408	1.00283	1.00237	1.00142	1.00875	1.01029	1.00557	0.997176	1.00483	0.994005	1.00713	1.00456	1	1.01658	0.999261	1.0017	0.994755	0.974704	0.978169	0.968209	1.00714	0.997709	0.999578	0.995108	1.00748	1.0132	1.0086	1.01087	1.00415	0.993987	0.990741	0.994955	1.00533	1.01298	1.02382	1.02571	1.01081	1.00702	1.00156	1.00585	1.01938
	1.33073	0.996177	0.986379	0.969785	0.992489	0.991146	0.998597	0.990935	0.998223	1.01253	1.0033	1.00247	0.986782	1.00723	0.998293	0.987078	0.991652	1.00868	1.02703	0.977364	1.00921	1.01165	0.992157	1.00248	0.983802	0.980551	0.973111	0.979571	0.992877	1.00189	0.992461	0.992386	1.01528	1.00456	1.0147	1.01028	0.992353	0.992583	0.992317	0.987873	1.01088	1.01054	1.0275	1.0098	0.984568	0.995933	1.01068	1.01681	0.995944
	1.33062	1.0149	0.995413	1.00729	0.981677	0.989583	0.991076	0.994442	0.988873	0.987985	1.01544	0.997549	1.00857	1.00293	1.00058	0.99383	1.00234	1.01743	1.00435	0.996371	1.00434	1.00948	0.995974	0.986464	0.98418	0.981665	0.98141	0.997861	0.99037	0.998509	0.996848	0.98185	1.00077	1.00553	1.00794	1.01321	1.01137	1.00372	1.00787	0.985604	0.995083	1.00435	1.01073	1.02139	1.00474	0.994835	1.00269	1.01807	1.00953
	1.33051	0.999443	0.989074	1.00542	1.00226	1.00423	0.992791	0.984318	0.991752	1.00582	0.996698	0.996126	1.01393	1.01319	0.991576	0.990016	1.00286	0.993094	1	1.00218	1.00501	1.01281	1.00252	1.00266	0.993103	0.97048	0.982467	0.983812	0.99013	0.982857	0.984082	0.980401	1.00394	1.01451	1.00204	1.01341	1.00119	0.987685	0.989741	0.981903	1.00367	1.01744	1.03429	1.00995	1.00847	1.00312	0.993992	1.01112	1.01442
	1.3304	1.00455	0.976605	0.993928	0.983118	0.991857	1.00107	0.974207	0.99242	0.983789	1.00838	0.99603	0.996275	1.00061	1.00842	0.988907	1.00401	1.00474	0.998941	0.99478	0.995676	1.00457	1.01143	0.989908	1	0.971474	0.97764	0.994982	0.991761	0.996212	1.00149	1	1.00124	1.00529	1.00427	1.01689	1.00493	1.01214	1.00792	0.989501	1.00471	1.01599	1.01014	1.00555	0.995169	1.00534	1.01979	1.00573	0.99214
	1.33029	1.00057	0.997598	0.979012	1.00058	1.00442	0.993052	0.984222	0.99332	0.984927	1.00154	0.996839	0.997265	1.01649	1.02145	0.993326	1.00305	0.998044	1.0027	0.988081	1.00688	1.01976	0.999093	0.989662	1.00865	0.975569	0.993481	0.987915	0.999009	0.992232	0.997075	0.990982	1.02242	1.01191	1	1.01871	1.00635	1.01565	1.00304	0.993236	0.992981	1.00509	1.01695	1.02059	1.02042	1.00596	1.0146	0.998858	1.01559
	1.33018	1.02069	0.992285	0.991283	0.984321	1.00282	0.974304	0.987925	0.987454	0.988683	0.992835	0.993969	0.995434	1	1.00663	0.99341	1.00563	0.999005	1.00964	0.9895	1.01311	1.00734	1.00188	1	0.987305	1.00175	0.978305	1.00159	1.00655	0.994987	0.997612	0.987654	0.999524	1.00631	1.01011	1.01296	1.0191	1.00335	0.993627	0.992965	0.999052	1.01795	1.00257	1.02281	0.993355	1.00439	1.01639	1.0212	1.00631
	1.33007	0.993506	0.993718	0.98038	0.995373	0.988802	0.98913	0.977925	1.01335	0.99947	1.00626	0.991006	0.984697	1.00323	0.989274	1.00553	0.996923	1.00657	1.01039	1.01108	1.0133	1.02372	1.0118	0.994737	0.978328	0.98565	0.986833	0.991781	0.994127	1.00532	0.983302	0.984879	1.00813	1.02176	1.00297	1.0013	0.997286	1.00976	0.999336	1	1.00962	1.02318	1.02559	1.00954	1.01083	1.00733	0.993721	1.00591	1.0091
	1.32996	1.00639	0.984983	0.988643	0.994469	1.00322	0.984359	1.00713	1	1.00746	0.998951	0.990513	1	1.00129	1	1.00058	1.00831	1.00656	1.00936	1.00194	1.00575	1.01006	1.02035	0.995694	0.982777	0.968431	0.982882	0.999432	0.9956	0.998887	0.997974	1.00149	1.00045	1.00873	1	1.01092	1.01065	0.997163	1.00936	1.00631	0.996026	1.01938	1.02031	1.00704	1.00686	1.01021	1.01168	1.02292	0.997419
	1.32985	1.00358	0.974958	0.993162	0.978632	0.98432	0.991719	0.995848	0.982501	1.02577	0.987792	1.00626	1.00181	1.01437	0.996005	0.976373	1	1.00053	1.00846	1.00461	1.01372	0.996828	1.02908	0.989011	0.991021	0.988	0.982115	0.974312	0.995887	0.997615	0.995742	0.988301	0.994697	1.00106	1.00847	1.00922	1.00924	1.01516	0.991579	0.97791	0.987952	1.00454	1.03513	1.00916	0.989613	1.00995	1.0048	1.01117	1.01263
	1.32974	1.01433	0.985217	0.984162	0.984192	0.994141	0.984026	0.988423	0.995562	0.996827	0.985959	1.0039	1.00299	1.0111	0.992825	0.988372	0.989071	0.990914	1.00546	0.994691	1.01235	1.02638	1.01357	0.988802	1.00908	0.984772	0.975	0.970513	0.998156	0.976059	1.00111	0.975181	1.00185	1	1.01401	1.01728	1.00883	1.0192	0.999257	0.992337	0.995082	1.01443	1.01221	1.00189	1.00178	0.986014	1.01271	1.00372	1.02237
	1.32963	1.00562	0.982578	0.990664	0.980901	0.973321	1.00091	1.00328	0.994337	0.984669	1	1.00214	1.00649	1.00399	1.00463	0.985014	1	0.999452	1.00977	0.999327	1.00132	1.0165	1.00525	1.00461	0.975381	0.998952	0.971924	0.986693	1.021	0.996154	0.986812	0.99408	1.0073	1.00111	0.997054	0.995199	0.990061	0.991763	1.00323	0.990972	0.985836	1.03148	1.02235	1.00655	1.0068	1.00725	1.00185	1.02864	1.01305
	1.32952	0.993762	0.998018	0.982314	0.990512	0.993821	0.984397	0.988868	0.999541	1.00848	0.998628	1.01161	1.00519	1.00268	0.988652	0.982497	0.996685	1.0011	1.00684	0.995129	1.01027	1.01258	1.01965	0.998826	1.00246	0.973291	0.991475	0.972109	0.987316	0.990463	0.989728	1.01256	1.00623	1.00175	1.00581	1.01307	1.025	1.00245	1.01801	0.999249	1.01187	1.01197	1.02793	1.02705	0.982445	1.01237	1.00461	1.01444	1.00707
	1.32941	0.998515	0.979663	0.993035	0.988879	0.980674	0.98193	0.971799	0.994725	0.996886	0.991308	1.00716	0.992358	1.01243	0.990885	1.00295	0.998335	1.00054	1.00121	0.985675	0.996626	1.01689	1.01415	0.989412	0.983133	0.992432	0.978814	0.988332	0.99466	1.00685	0.980637	0.99882	1.0021	1.00899	1.00331	1.00446	0.996899	0.989516	0.987066	0.995562	0.998713	1.01805	1.00383	1.00557	1.00716	0.998049	0.99868	0.992763	1.01207
	1.3293	0.996914	0.991736	0.991304	0.990136	0.991047	0.990022	0.991491	1.01041	1.00395	1.00524	0.990905	1.00267	1.01819	0.989109	1.00238	1.0028	1.00822	1.00422	1.00544	1.01297	1.02131	1.00773	1.00482	1	1.00219	0.971503	0.983229	0.995927	1.01	0.989644	1.00318	1.00172	1.02006	1.00135	1.01742	1.00412	1.01183	0.996025	0.997915	0.994933	1.01245	1.03814	0.995671	1	0.99934	0.993984	1.01532	1.00729
	1.32919	1.0066	0.993779	0.992663	1.00335	0.979812	0.996056	0.985752	0.997058	1.00911	0.993077	1.00809	1.00577	1.01607	0.99876	1.00627	1.00382	1.00268	1.01123	1.01557	0.998647	1.01524	0.976445	0.990326	0.993655	1	0.977935	0.998577	1.0103	0.996408	0.978346	0.989039	1.00488	1	1.01569	1.02552	0.994907	0.988465	0.994337	0.9993	0.998789	1.02001	1.02861	1.01959	1.01007	0.997932	1.00414	1.01637	0.999242
	1.32908	1.0005	0.977249	0.984697	0.997534	0.982118	0.999552	0.99544	0.982464	0.994792	0.99826	1.00797	1.01133	1.01822	0.995277	0.994152	1.00051	1.01124	1.01053	0.998004	1.00268	0.996656	1.00441	0.99271	0.985093	0.998873	0.965608	1.00216	0.997886	0.992852	0.99458	0.998654	1.00988	1.0073	0.996269	0.99515	1.0044	1.01935	0.995004	0.997797	1.00882	1.00307	1.01894	1.00822	1.01101	1.01345	1.0079	0.996364	0.992132
	1.32897	0.994021	0.992593	0.992969	0.992493	0.981578	0.990005	0.984665	0.990244	0.992873	0.992544	1.02361	0.997983	1.01184	1.00345	0.98922	0.99105	1.01258	1.00338	1.01265	0.998658	1.01712	1.00333	1	1	0.987514	0.982727	0.989035	1.0079	0.991118	0.993103	0.994494	1.025	1.00148	1.02383	1.01487	1.00576	1.00666	0.983304	0.980363	1.00066	1.00314	1.02054	1.00325	1.00082	0.998374	1.0055	1.01783	1.00252
	1.32886	0.988454	0.975954	0.979526	0.970414	0.984119	1.00231	0.984471	0.994163	0.97899	0.975045	0.996198	1.00251	0.989041	0.996579	1.00205	0.991874	1.00138	1.01776	1.00965	1.01009	1.01258	1.01774	0.982968	0.98278	0.985667	0.983171	0.997793	0.994249	1.00749	0.986869	0.988268	1.00259	0.987796	1.00737	1.01467	1.01195	0.99801	0.980392	0.984928	1.00137	1.02318	1.02643	1.0117	0.993666	0.989158	1.02886	1.02381	0.99554
	1.32875	0.976732	0.989674	0.976554	1.00261	0.974647	0.987666	0.983238	0.995421	0.995816	1.00514	0.994123	1.00154	1.00742	1	1	0.9908	1.00778	1.00158	1.00496	0.990372	1.01727	0.996629	0.998733	0.97967	0.983642	0.990385	1.00455	1	0.996183	0.985043	0.968927	0.997351	1.01111	1.01211	1.00095	0.994903	1.00948	1.00192	0.976581	1.00903	1.0095	1.03561	1	0.985827	1.00828	1.00173	1.01596	1.00951
	1.32864	0.997384	0.99011	0.984967	0.973168	0.98654	0.993211	0.986295	1.00505	1.00186	1.00655	0.997534	0.997388	1.01404	1.00523	0.989209	0.991608	1.0064	0.997889	1.00715	0.995732	1.00853	1.00777	1.01781	1.00128	1.00993	1.00088	0.982143	1.00829	0.989256	1	1.00578	0.99866	1.0064	1.01578	1	0.986584	0.99027	1	1.01104	0.995049	1.01708	1.02212	1.01815	0.987241	0.989699	1.01952	1.00271	0.989066
	1.32853	0.992354	0.985915	0.980493	0.984785	0.975451	0.981382	0.99749	0.987061	1.00423	0.990624	1.00401	0.9936	0.996424	1.01136	0.984029	0.991569	1.00139	1.01497	1.01731	0.995308	1.02815	0.994845	1.01356	0.97867	1.01232	0.972542	0.977105	1.01279	0.990762	0.997091	1.00293	0.986477	1.00159	1.0177	0.989268	0.994641	1.01705	0.993697	0.98374	1.0061	0.990826	1.02479	1.01628	1.02082	1.00244	1.0143	1.02443	1.00097
	1.32842	1.00286	0.980322	0.981359	0.979212	0.981733	0.978011	0.987799	0.985707	0.992733	0.990258	0.989324	1.0044	0.99633	0.987805	0.976077	1.01236	0.99952	1	1.00843	1.01653	1.02336	0.980257	1.0035	1.00125	0.985475	0.978241	0.973939	1.00595	1.00548	0.994905	0.984467	1.0049	0.994172	1.00726	1.00416	1.00888	0.987179	0.997773	0.994366	1.00735	1.02331	1.00924	0.998205	1	1.00418	1.01216	1.00947	1.0028
	1.32831	0.989708	0.979653	0.977723	0.990363	0.988121	0.972769	0.990698	0.987739	0.982742	0.999507	0.996901	0.993414	1.0061	1.00806	0.987958	0.996016	1.01401	1.00166	0.992849	0.998821	1.01057	1.00983	0.981799	1	0.983678	0.990958	0.98873	0.98169	0.990957	0.985765	1.00515	0.999289	1.00256	1.00563	1.037	1.01714	1.00237	0.997719	0.974163	0.997508	1.02163	1.0276	0.99807	0.994792	0.993934	1	1.02332	1.00097
	1.3282	0.995362	0.982958	0.973024	0.998833	0.988814	0.989396	0.97544	0.99453	0.989879	1.0005	0.998931	1.008	1.00248	0.997505	0.989532	0.994371	1.01483	1.00227	0.986699	0.993487	1.01448	0.990918	1.0043	0.993274	0.986708	0.970364	0.991189	0.988756	0.994849	0.992046	1.00378	1.02833	1.0252	1.00381	1.00847	0.986301	1.00711	0.997699	0.993915	1.00873	0.996619	1.00479	1.01142	1.00767	1.00367	1.01869	1.00095	0.995833
	1.32809	0.99705	0.980993	0.972905	0.989279	0.980888	0.976732	0.983471	1.00408	0.992809	1.00361	1.00161	1.0023	0.9975	0.992509	0.98618	0.996419	0.990895	1.01143	0.998142	1.00302	1.0068	1.01906	1.01413	0.995546	0.986355	1	0.995723	1.01123	0.977892	0.991279	1.00605	1.00356	1.00945	0.989524	1.00326	1.03173	1.01923	0.996516	0.984894	0.986667	1.01604	1.00957	1.0137	1.00309	1.00394	0.997115	1.00689	0.998937
	1.32798	0.974925	0.998724	0.987179	0.986153	0.970787	0.994961	0.979513	0.988947	0.987234	0.993734	0.996124	1.01457	0.998083	0.996164	0.982123	0.995874	1.00817	1.01107	0.995544	0.99566	1.03061	0.996994	0.978402	0.987696	0.98419	0.990148	0.995865	1.01081	0.989146	1.00142	0.975465	1.00356	0.991387	1.00768	1.03122	0.984688	0.992718	0.998836	0.985816	1.01196	1.01727	1.00692	1.01517	1.02545	1.0021	1.00106	1.01472	1.01557
	1.32787	0.988272	0.991509	0.974043	0.995113	0.980278	0.986947	0.975	0.979679	0.993892	1.00274	0.998857	0.993983	1.02184	0.990844	0.997095	0.99682	0.993808	1.02269	0.990397	1.00064	1.01532	1.00101	0.997802	0.994279	1.00306	0.9832	0.991222	1.00265	0.990787	0.990978	0.992717	0.986301	1.01033	1.00388	1.00445	0.998773	1.00767	0.984412	0.980473	0.983271	1.01642	1.02092	1.03132	0.990196	0.998924	1.02227	1.01732	1.02375
	1.32776	1	0.986175	0.978667	0.982801	0.988869	0.992639	0.982276	0.990899	0.999448	0.990576	1.00716	0.989513	1.00272	0.988636	0.989311	0.988776	1.01155	1.00415	0.997404	1.00518	1.01048	1.0031	0.998883	0.988688	1.00303	0.991093	0.980692	0.992931	1.00139	0.99729	0.998622	0.994421	1.00597	0.998054	0.992188	1.00374	1.00261	1.00761	1.01842	1	0.99454	1.02503	1.01869	0.993289	0.988864	1.00229	0.996471	1.02481
	1.32765	0.989724	0.979347	0.968515	0.989828	0.995755	0.978886	0.993529	1.00111	1.00969	0.986286	0.987995	0.997428	0.997899	1.00636	1.00922	0.979989	1.00376	0.997552	0.994087	0.988903	0.997541	0.986126	1.00918	0.992908	1	0.982056	0.982597	0.996713	0.991041	0.993408	0.986459	0.999312	1.01645	1.00692	1.04137	0.998739	1.00663	1.00383	0.994407	1.00904	1.00957	1.01919	1.00117	0.987371	0.998839	1.01794	0.998783	0.992136
	1.32754	0.988365	0.985695	0.970485	1.00066	1.00252	0.981797	0.981527	0.998851	0.991264	0.988908	1.0162	0.995425	0.99854	1.01324	0.997429	1.01881	1.00391	1.0209	1.00818	0.996642	1.01796	1.0011	0.989336	0.972671	0.978495	0.97708	0.980151	1.00201	0.990793	0.982353	0.990079	0.999341	0.995798	1.00293	1.00812	1.01682	0.970169	1	0.987528	1.02497	1.001	1.01116	1.01966	0.998804	0.983274	1.00993	1.0051	1.01107
	1.32744	1.00266	0.972261	0.983826	0.973702	0.978358	0.998184	0.968235	0.994223	0.984945	0.999413	0.981378	0.998021	1.01234	1.00074	0.978792	0.987342	1.0063	1.00776	1.01168	1.03755	1.02172	1.01891	0.980884	0.990062	0.980176	0.967241	0.98743	1.00894	1.00431	0.994071	1.01525	1.00575	0.999214	1.01665	1.00566	1.01533	1.00649	1.00772	0.989726	0.989733	1.01344	0.997725	1.01252	1.00951	1	1	1.02341	0.995873
	1.32733	0.978709	0.976344	0.963636	0.971391	0.985209	0.988043	0.982803	0.984652	0.999401	0.986731	0.993029	1.00404	0.985915	0.991834	0.999332	0.985915	1.0006	1.00267	0.992888	1.00282	1.00443	0.994299	0.987893	0.993598	0.979933	0.961573	0.985497	1.01064	1.00072	0.994634	0.993307	0.99281	0.991345	1.00883	1.00432	0.994994	0.996134	0.994845	0.990751	1.00417	1.00513	1.02345	0.996154	1	1.02244	1.02953	1.00793	1.02315
	1.32722	0.992455	0.967025	0.99626	1.00069	0.977332	0.983534	1.00128	0.974435	0.991379	0.994489	1.00461	1.0035	1.01143	1	0.99056	0.990695	1.00865	1.01304	0.982079	1.00433	1.04475	1.00576	1.01498	1.0039	0.996575	0.980287	1.01443	0.987796	1.02015	0.993848	0.991126	1.00936	1.02396	1.00886	0.991903	0.99759	1	1.00129	1.00462	1.00731	1.01228	0.997685	1.013	0.997478	1.00513	1.01713	1.01355	1.00873
	1.32711	0.990661	0.974848	0.996097	0.986311	0.994429	0.984646	0.97465	0.986102	0.993532	1.00129	1.00899	0.984772	1.0226	0.995192	0.994413	1.0158	0.992985	1.02435	1.01082	1.01465	1.00949	0.978698	1.01167	0.97619	0.994125	0.988669	0.995352	0.993837	0.989836	0.991354	0.994203	1.00277	0.997508	0.999088	1.02194	0.99295	1.02461	1.02	0.99295	1.01722	1.01494	1.00355	1.0174	1.01169	0.997344	1.00275	1.01401	1.01841
	1.327	0.989154	0.97798	0.982906	0.999278	1.00836	0.983806	0.964048	0.977157	0.971172	1.00323	0.995876	1.00511	0.991339	0.998387	0.988596	0.987055	0.993025	1.00732	0.9992	0.990719	1.02233	1.03258	0.970323	0.977394	1.0097	0.975355	0.98446	1.00536	0.98986	0.987537	0.983297	1.00698	1.00328	1.03014	1.00614	0.995381	1.01111	0.983931	0.979118	0.985217	0.992655	1.00965	1.00546	0.978177	1.02561	1.00275	0.998582	1.00313
	1.32689	0.993851	0.969364	0.987962	0.981631	0.990648	0.977335	0.975962	0.978723	0.992637	0.994652	0.988842	1.01051	1.02078	0.988496	1.01332	0.991316	1.00655	1.00817	1.01548	1.00961	1.01111	1.00757	0.985411	0.983562	1.00123	0.99612	0.98511	0.993018	0.97852	0.991692	0.990277	0.996449	0.996661	0.993659	1.00104	1.02284	1.0025	0.987923	0.992248	1.00737	1.01178	1.01095	1.00681	1.00925	0.997326	1.00279	0.977077	1.00158
	1.32678	0.990446	0.967213	0.968543	0.967125	0.990203	0.991398	0.991465	0.995283	0.987805	1.0082	1.00143	0.997717	0.994191	0.994962	0.993338	0.99328	1.01408	1.0068	1.00164	0.995895	1.01339	0.996027	0.990463	0.984594	0.998742	0.978088	0.968254	1	1	1	0.999234	1.00292	1.00254	0.998127	1.00642	1.01193	0.979772	1.00244	0.990415	0.998988	1.01196	1.02343	1.02371	0.992063	0.994674	1.007	1.00581	1.00638
	1.32667	0.980149	0.993876	0.971329	0.982955	0.962733	0.99037	0.980147	0.996525	0.986815	0.988145	0.984398	1.00634	0.994022	1.00779	0.970852	0.979833	0.994498	1.00545	1.01095	0.999165	0.980229	1	0.966102	0.988338	0.983503	0.98374	0.986831	0.998373	0.988343	0.985156	0.999221	1.00298	1.00962	0.995229	1.00854	1.00118	1.0235	0.991379	0.996839	0.996967	0.991675	1.0358	1.01536	1.01598	0.979973	0.991608	1.0043	1
	1.32656	0.984848	0.965867	0.958829	0.994885	0.988458	0.978342	0.975665	0.98059	0.998565	0.999294	0.997771	0.997638	1.00781	1.01402	0.985562	0.987465	1.01547	1.00561	0.999155	1.0076	1.01386	1.02751	0.99562	1.00304	0.986842	0.985507	0.998317	1.00496	0.979866	0.991235	1	1.00526	1.01606	1.01082	0.997826	1.01441	1.0038	1.02083	0.990436	1.01204	1.01308	1.00467	1.00134	1.00896	0.987013	0.998623	0.997147	0.989164
	1.32645	0.969925	0.966767	0.988855	0.983971	0.985569	0.965571	0.99444	0.975717	0.989505	0.983988	1.00464	1.01306	1.00898	0.994662	0.975875	0.990674	1.00071	1.00891	1.00953	1.03051	1.01197	0.998623	1.01657	0.993874	0.98913	0.978678	0.994787	0.983319	0.987158	0.992724	0.993543	1.01308	1.00455	1.01896	1.00224	1.01214	1.01001	0.997579	0.972632	1.00595	1.02275	1.0226	1.01797	1.03851	0.966038	1.00274	1.00427	0.996909
	1.32634	0.957992	0.968917	0.966194	0.968868	0.989556	0.975124	0.972673	0.994427	1.01871	1.0053	0.995945	0.984823	1.00091	0.999095	0.981013	1.01341	0.985735	0.979741	0.985891	1.00712	1.00979	1.00855	0.982036	0.970588	0.991678	0.977553	1.00548	1.00087	0.984224	0.985197	0.981209	1.00717	0.995383	1.03189	0.995434	0.992611	1.00259	0.990208	1.00109	0.999019	1.02846	1.01237	1.01637	0.991813	0.98773	0.99177	1.00725	1.00466
	1.32623	0.974557	0.964612	0.968822	0.976507	0.968372	0.984155	0.97075	0.982051	0.997579	0.993755	0.999138	1.02277	0.994302	1.00558	0.992531	1.00303	1.00075	0.997451	1.0082	1.00091	1.02762	1.00719	0.983333	0.983793	1.00144	0.984971	0.991485	0.991682	1.00459	0.980591	0.991453	0.994318	1.00869	0.997917	1.01643	0.998731	1.01337	0.990979	1.00551	1.002	1.01067	1.04028	1.013	0.995244	0.979493	1.00273	1.01724	0.990826
	1.32612	0.959322	0.979641	0.940547	0.966377	0.983301	0.985361	0.98835	0.981498	0.980591	0.997555	0.983171	1.00095	1.01586	1.00291	1.00514	0.998453	0.997717	0.997405	0.98725	1.02516	1.00573	0.985549	1.00155	1.00654	0.998536	0.976852	0.992315	0.994419	1.00663	0.994769	0.984784	0.997521	1.02473	1.01589	0.996458	1.01144	0.986559	1.00917	1.0023	0.998962	1.012	1.00336	0.994885	1.00856	1.00498	0.977778	0.99589	0.985075
	1.32601	0.957944	0.97764	0.978535	0.967742	0.968652	0.970472	0.983385	0.987793	0.98279	1.00612	1.0066	0.983463	1.01249	1.01562	0.995528	0.986179	0.985838	1.01266	0.991477	1.02122	0.983333	1.0181	0.990228	0.984874	0.974963	0.984375	1.00706	0.993197	0.983317	0.989918	0.990018	1.01033	1.00203	1.01902	0.998761	0.984211	1.01834	1.00409	0.990488	0.985059	1.01675	0.997666	1	1.00126	0.976101	0.988064	0.991903	0.995549
	1.3259	0.97552	0.954774	0.971242	0.962424	0.996602	0.995717	0.977124	0.982231	1.00198	0.989011	0.997065	1.01126	0.982571	0.998934	0.999052	0.994894	0.988599	1.00091	1.00484	0.991098	1.00607	1	0.980392	0.979203	0.983459	0.984146	1.00101	1.00394	1.00517	1	0.997126	1.00444	0.992835	1	0.998741	0.990604	0.987342	1.00548	0.995074	1.00659	1.02578	1.02706	1.02961	0.994924	0.989677	0.993351	0.990489	0.992625
	1.32579	0.992593	0.945666	0.963206	0.981481	0.967252	0.992009	0.971559	0.978125	0.992678	0.988119	1	1.00634	0.99884	1.01354	0.996158	0.984099	1.01388	1.01977	1.01633	1.013	1.02491	1.00317	1.00172	1	1.0031	0.983871	0.970165	0.984848	0.98218	0.992203	1.0119	1.01328	1.0011	1.00233	0.981982	1.00693	1.03448	0.998595	0.9975	1.01591	1.00553	1.00991	1.00546	1.0013	0.997333	1	0.986169	0.995496
	1.32569	0.959476	0.957198	0.971467	0.972656	0.968408	0.983412	0.970096	1.00222	0.96696	0.988147	1.0102	0.996587	0.993857	0.973594	1.01129	0.998155	0.989918	1.00404	0.997932	1.00941	1.01047	1.0049	1.0208	0.958855	0.970968	1.00525	0.982814	0.990486	0.978678	0.990946	0.997955	1	1.00452	1.00497	1.00954	0.998557	1	0.995608	0.979434	1.00935	1.04238	1.00903	1.00985	0.998647	0.990358	1.017	1.00437	0.986175
	1.32558	0.961176	0.946085	0.972	0.963338	0.974296	0.965311	0.986487	0.989595	0.990577	0.996528	0.98063	1.02125	1.01697	0.991326	1.01522	0.998996	1.00486	0.99477	0.991435	1.00539	1.02692	1	0.970383	1.00558	0.991749	0.982574	0.988999	1.0076	0.99118	0.988798	1.01653	0.984127	1.00942	1	1.00142	1.01357	1.0269	1.0121	1.00133	0.994076	1.01288	1.02397	0.995733	1.01248	0.977809	0.982808	1.00445	0.988906
	1.32547	0.961446	0.94402	0.968877	0.982028	0.971975	0.992318	0.994825	0.972189	0.991358	0.976801	1.0013	0.986577	1.01154	0.982289	0.995249	0.983854	0.995736	1.00809	0.982659	1.01151	1.0211	0.996528	0.996324	1.00786	0.976231	0.988904	0.970819	1.00903	1.00232	0.994618	1.00437	0.996835	1.01714	0.997333	1.02691	0.995268	0.973554	0.99064	1.00846	0.98239	1.01966	1.00685	1.01349	1.00289	0.985401	0.996988	1.01881	0.96796
	1.32536	0.944181	0.945342	0.956298	0.975155	0.984887	0.969887	0.979301	0.968561	0.968098	0.983951	1.00676	0.998617	0.998505	0.989914	0.964198	0.99557	1.04227	1.02002	1.00856	1.00471	1.02594	1.0053	1	0.990348	1.00879	0.954795	1.00703	1.00583	0.987239	0.991247	0.99779	0.993664	0.997515	1.02044	1.01964	1.0081	0.984823	0.998344	0.984241	0.997403	1.02911	1.00852	1.0216	0.99269	1.01229	1.01426	0.974026	0.959292
	1.32525	0.970588	0.952081	0.961333	0.968828	0.972488	0.983233	0.965517	0.99508	0.97037	0.981108	1.00677	0.991549	0.995378	0.980333	0.974522	0.993127	0.986971	0.99642	1.00785	0.974138	1.00295	0.985533	1	1.01	0.985637	0.989971	0.990385	1.00465	0.99759	0.989691	1.00682	1.01095	0.984925	0.997286	1.01229	0.990164	1.02982	1.00509	0.982301	1	1.00893	1.00435	1.00315	0.973254	0.972851	1.01597	0.985318	0.973214
	1.32514	0.934757	0.965924	0.965753	0.969427	0.985401	0.970519	0.980843	0.97294	0.968828	0.996063	0.984848	1.01799	0.983687	1.00159	0.989116	1.00367	1.02212	1.00381	0.986413	1.00397	1.00485	0.994106	0.979675	1.01467	0.978378	0.986587	0.992443	0.989051	0.991337	1.01746	0.972414	1.01144	1.00131	1.00424	1.02057	1.03813	1.00543	0.967466	1.00623	0.995856	1.01374	1.00152	0.996753	0.990654	1	0.964286	1.0034	0.976059
	1.32503	0.958134	0.946633	0.969822	0.949677	0.9754	0.96195	1	0.991337	0.982885	1.01902	0.970339	1.00312	1.00169	1.00832	0.989943	1	0.985019	1.00556	1.00142	1.03683	1.00675	0.977778	0.993763	0.984946	0.988484	0.978691	0.998723	1.02767	0.996164	0.981993	0.979641	0.990719	0.990654	1.01166	1.00657	1.01604	0.989209	0.989418	0.995238	1.02326	1.00559	1.01713	0.981728	0.970313	0.966997	0.978003	0.992995	0.992188
	1.32492	0.948317	0.94957	0.955696	0.970323	0.982781	0.968632	0.978803	1.00862	0.985019	0.989404	1.00147	0.96302	1.02087	1.0192	0.973966	0.998605	1.01357	0.998532	0.985008	1.01484	1.01815	0.993506	0.966216	0.984375	0.985656	0.972492	0.993151	0.997406	0.982736	1.00253	1.00256	1.00746	1.00423	1.01235	1.01015	1.02033	1.01181	1.00377	0.98682	0.99403	1.01625	0.988449	0.996497	0.991667	0.982578	0.994652	0.998162	0.972332
	1.32481	0.942892	0.948529	0.928224	0.954051	0.961089	0.994798	0.969974	0.998753	0.974042	1.02372	1.01153	1.00621	1.02285	0.985866	1.00636	0.973951	1.0159	1.00776	0.990566	0.992138	1.02687	0.970252	0.96934	0.988345	1.00218	0.965636	0.966667	0.991903	1.00693	1.0144	1.00519	1.00513	0.98987	0.990755	1.03114	1.00752	1.00778	0.996219	0.981481	0.972435	0.975867	1.04211	1.00945	0.982175	0.9839	0.994545	1.00375	0.96701
	1.3247	0.920635	0.938287	0.967172	0.940334	0.960784	0.986198	0.958816	0.963795	1.0038	0.978149	0.980447	0.99696	0.979661	0.989305	0.996732	0.997019	1.0178	0.996678	0.995008	1.02852	0.995968	0.992736	0.982927	1.00505	0.984234	0.978339	1.00892	0.988811	1.00145	0.983871	0.977602	1.0065	1.01935	1.04032	1.02688	1.01152	0.996055	0.965385	0.982729	0.976526	1.00314	1.00532	1.00566	0.996364	1.00738	0.988636	0.965714	0.964876
	1.32459	0.932668	0.955959	0.964333	0.97125	0.96977	0.984261	0.97335	0.987245	0.99336	0.985115	0.995714	0.981735	1.01358	0.991039	0.978333	0.97856	0.98773	1.01062	1.00894	0.982517	0.991416	1.021	1.00539	0.992042	0.995305	0.964684	0.969088	0.989247	0.993631	0.982533	1.00139	1.0163	1.00313	0.988468	1.00917	0.982283	1.02537	1.01018	0.985714	0.988543	1.00963	1.02394	0.971319	0.985047	0.992381	0.981928	0.97996	0.951965
	1.32449	0.897059	0.906128	0.923387	0.961006	0.958987	1.00482	0.967702	0.973717	0.977807	0.997226	0.983965	1.00155	1.01503	1.00531	0.973422	1.0208	1.01618	0.98741	0.987156	1.01299	0.981982	0.994505	0.969697	1	0.98533	0.992048	0.98036	0.98843	1	0.986364	1.00746	1.01681	1.01592	1.01382	1.02524	1.00401	1.00214	1.0084	1.01493	0.988372	1.00165	1.02026	1.002	0.965318	0.95992	1.02731	0.97479	0.96347
	1.32438	0.918987	0.925575	0.948895	0.957309	0.962687	0.956938	0.975278	0.988971	0.969659	0.983696	0.992582	0.979167	0.958904	0.991166	0.957377	1	0.988487	0.972171	0.976699	0.994118	1.00726	0.982759	0.98494	1.03715	0.976064	0.985169	0.99651	0.998308	1.00722	0.98843	1.00486	1.00614	1.01382	0.978984	1.00198	1.01279	0.980089	1.01087	1	1.00351	1.01568	1.00584	0.99384	0.983968	0.971253	0.993603	0.986696	0.95962
	1.32427	0.935829	0.917007	0.930889	0.953457	0.953105	0.958853	0.966165	0.96337	0.978908	0.978261	0.989971	0.958533	0.983754	0.994545	0.986622	0.980738	0.988468	1.00969	0.98773	0.994	1.02764	0.982036	0.980831	1.00331	1.0086	0.968889	0.990654	0.982175	0.971429	0.994718	0.97774	0.996785	1.0053	0.981273	0.991903	1.0108	1.01856	0.99115	0.980469	0.996337	1.01449	1.0125	1.01316	0.971545	0.964135	0.986696	0.979775	0.968059
	1.32416	0.927989	0.909986	0.94058	0.945983	0.964143	0.963777	0.9677	0.97171	0.984694	0.988417	0.993017	0.980583	0.976059	0.998124	0.980231	0.990369	1.01163	0.953935	0.989691	1.03426	0.989899	1.02201	1	1.01748	0.976048	0.950704	1.016	0.994307	0.990584	0.980072	1.01289	0.988055	0.998099	0.997988	0.980892	0.986395	1.00487	1.01179	0.993802	1	1.00189	1.00205	1.01587	0.980603	0.971678	0.961969	0.974713	0.964377
	1.32405	0.936872	0.922741	0.907875	0.954738	0.949728	0.961385	0.950402	0.962821	1.00403	0.99734	0.982955	1.00657	1.00375	1.00585	1.00175	1.00327	0.981818	0.996032	0.993576	0.997812	0.97619	0.96463	1	1.02158	1.00974	0.976923	0.982456	0.983122	1.00402	0.990584	0.990177	0.981851	0.989691	0.985169	1.02638	1.00483	0.970588	1.00242	1.0022	1.022	0.974952	1.00889	0.985882	0.96614	0.983871	0.978622	0.942584	0.952
	1.32394	0.907738	0.958074	0.952756	0.946064	0.944521	0.974044	0.957064	0.978523	0.997257	0.993094	0.985251	0.998353	1.03214	0.99812	0.965035	0.994881	0.975166	1.02395	1	1.02609	1.0027	0.973941	0.975352	0.985185	0.986487	0.957784	0.979821	0.958696	0.978678	0.976238	0.985859	0.973077	1.00652	1.0162	0.990291	1.01554	0.987047	0.9675	0.973034	0.985537	0.998016	1.02041	0.990196	0.983491	0.964201	0.958838	0.960199	0.941667
	1.32383	0.926868	0.914239	0.910891	0.95768	0.95301	0.943056	0.968616	0.969822	1	0.979769	0.953632	0.986532	1.01862	0.990637	0.968804	0.977702	1.00346	1.00205	0.987041	1.02857	1.00829	1	1.00722	0.977528	0.989437	0.980282	0.969412	0.988399	1	0.995842	1.01754	1.0083	0.970787	1.00732	0.951031	1.00538	1.00552	0.950392	1.00235	0.987152	1.01266	1	0.9875	0.95	0.960396	0.98961	0.950131	0.959302
	1.32372	0.875606	0.915225	0.924658	0.936275	0.945205	0.932053	0.949853	0.961972	0.972303	0.964809	0.96563	0.977153	0.977273	0.990177	0.996485	0.983165	0.99823	0.985801	0.997763	1.03628	1.01389	0.986395	0.971831	1.01969	0.967971	0.979229	0.984925	0.987654	0.973236	0.986333	0.997696	1.00442	1.0075	0.967742	0.994334	0.973451	0.976812	0.991429	0.997468	0.971678	1	1.01238	0.997355	0.97201	0.984	0.950521	0.933702	0.925595
	1.32361	0.86755	0.932021	0.903052	0.935264	0.949919	0.941085	0.937117	0.973723	0.986765	0.980422	0.978964	0.991166	0.952199	1.00404	0.984127	1	1.0118	1.02579	0.991131	0.995475	1.00276	0.965986	0.960573	1.04	0.988848	0.972973	0.989637	1.01531	0.992288	1.00959	0.98801	1.02791	0.992424	1.01887	0.965418	0.99359	0.993671	0.987842	0.997297	0.978673	1.0069	1.00783	0.986339	0.959184	0.952255	0.961111	0.962963	0.939394
	1.32351	0.844068	0.924771	0.934109	0.921147	0.954003	0.951923	0.939935	0.953917	1.00155	0.97956	0.982729	0.966912	1.0101	0.942973	0.974359	1.02435	1.02226	1.00994	0.997859	1.01402	0.997101	1.00353	0.971429	0.996139	0.964413	0.984472	1.01351	1	0.981233	1.00258	1.00781	1.00752	0.983333	0.997126	1.02258	1.02048	1.04947	0.993464	0.973451	0.966667	0.992519	0.981383	0.994253	0.965147	0.958333	0.940171	0.952381	0.902208
	1.3234	0.82149	0.872222	0.917323	0.944341	0.94386	0.915563	0.957338	0.971292	0.971429	0.991736	0.968142	1.01338	0.989817	0.983333	0.998095	0.986014	0.982425	1	0.968354	1.03712	1.00295	0.992701	0.944649	0.984733	0.937063	1	0.973822	0.986979	1	1.00533	0.98916	1.00792	0.991379	0.954545	0.97651	0.968421	1.04	0.989796	0.984472	0.991379	0.963824	1.00583	0.99375	0.99711	0.964497	0.951952	0.932515	0.912752
	1.32329	0.825046	0.860421	0.907445	0.906716	0.923218	0.925	0.94955	0.957411	0.983108	0.971429	0.962162	0.974708	0.995763	0.971983	0.955426	0.989091	1	0.995671	0.98441	1.00913	0.982036	1.01498	1.01544	0.988048	0.96679	0.98125	1.0163	0.976253	1.01433	0.994413	0.975	0.949062	0.969136	1.01993	1.01075	0.960145	1	0.981949	0.980328	0.975976	1	1.00314	0.958064	0.971519	0.940439	0.961905	0.928571	0.91844
	1.32318	0.851779	0.857715	0.922432	0.940358	0.931818	0.959335	0.954111	0.950791	0.968641	0.977233	0.962687	0.97546	0.997826	0.969027	0.993827	0.974453	1.0019	1.00223	0.970252	0.984127	1.00289	0.985816	1.01538	0.995868	1.00787	0.984076	0.97319	0.986702	1	0.977901	0.974504	1.00287	1.00327	0.99661	1.01556	0.976923	0.979839	0.977011	1	0.957831	1.00601	0.990196	0.99631	0.949324	0.95302	0.936027	0.952055	0.849817
	1.32307	0.839662	0.847966	0.916115	0.90593	0.92549	0.945312	0.960938	0.936248	0.960073	0.975746	0.959538	0.991614	0.975113	1.00708	0.995833	1	1.00571	1.01605	0.988038	1.01932	0.982857	0.99635	1.01946	1.00847	0.969112	0.98366	1.02235	0.99458	1.01972	1.01377	1	0.991525	1.00331	1.02174	0.992095	0.991667	0.978632	0.959184	0.98893	1.01014	0.984026	0.989286	0.988327	0.956522	0.935943	0.977359	0.932384	0.888462
	1.32296	0.802661	0.831839	0.888112	0.902174	0.894422	0.928144	0.927835	0.98249	0.960227	0.982213	0.985386	0.96468	1.00723	1.00241	1.01092	0.968872	0.993988	1	0.992443	0.977887	0.991098	1.03358	0.980989	0.971888	1	0.976744	1.00893	1.01685	0.964384	1.03371	0.980282	1.00288	0.960133	1.00735	1	0.977679	0.981132	0.995413	1.00806	0.996296	0.950178	1	0.933333	0.934866	0.948207	0.927126	0.918033	0.905983
	1.32285	0.820093	0.811456	0.885645	0.913717	0.911017	0.913481	0.923236	0.927875	0.968254	0.97996	1.01324	0.983759	0.968447	0.977887	0.984749	0.996008	1.0123	0.986047	1.00998	0.967822	0.996979	1.01916	1	0.905138	0.959259	0.963696	0.994118	1	1	0.960106	1.00275	0.969274	0.956113	0.967391	0.9875	0.99537	0.97561	0.990566	1.00424	1	0.969582	0.96748	0.961538	0.962963	0.963115	0.939655	0.857741	0.813853
	1.32275	0.790361	0.823834	0.851282	0.926714	0.908096	0.907173	0.930085	0.965726	0.951219	0.991614	0.982022	0.955083	1.0026	0.976804	1.00911	0.997908	0.997912	0.976019	0.990123	0.977387	1.01863	1.03089	0.972	0.970464	0.96875	0.986885	0.974063	0.953039	0.982906	0.964674	1.00575	1.01111	0.981538	1.02612	1.02966	1.03721	0.98	0.980861	0.995575	0.971545	0.976654	0.958159	0.959091	0.936709	0.936709	0.911111	0.908676	0.817352
	1.32264	0.796569	0.789474	0.828338	0.857855	0.874157	0.914989	0.933036	0.947479	0.935146	0.982301	0.981043	0.933498	0.983471	0.98374	0.961995	0.991228	0.971862	0.990148	0.969072	1.01323	0.996764	0.980916	0.979424	0.969432	0.968627	0.956811	1.00287	0.983003	1.00293	1.01163	0.971014	0.969444	0.996914	0.961268	0.987342	0.986239	1.01036	1.00995	0.97235	0.991597	0.963415	0.969565	0.948837	0.972603	0.950451	0.915493	0.873171	0.835821
	1.32253	0.82732	0.77628	0.802667	0.904	0.885086	0.87963	0.925059	0.944444	0.958696	0.963883	0.941589	0.958442	0.994366	0.950138	0.940887	0.995402	0.968182	0.970899	1.03306	0.981132	1.03367	0.976744	0.983122	0.982301	0.987705	0.986487	1	1.02671	0.959654	0.967033	1.0059	0.985549	0.980392	0.975089	0.97992	0.972973	0.995	0.995074	0.986175	0.986957	0.969828	0.963303	0.942857	0.92381	0.922705	0.940298	0.832512	0.858639
	1.32242	0.856338	0.765043	0.810888	0.850267	0.897906	0.874074	0.928571	0.916667	0.944573	0.99284	0.984962	1.00274	0.991045	1	0.955614	0.983254	0.990385	1.02292	0.947075	1.03458	0.97561	0.995745	1.00873	0.959276	0.983539	1.01038	0.960606	0.940476	0.98209	0.983099	0.978788	0.982143	0.99308	1.01938	1.0332	0.928889	0.974619	0.959799	0.916279	1.01389	0.965665	0.952381	0.948454	0.965686	0.927835	0.90625	0.867347	0.873626
	1.32231	0.840708	0.814241	0.820189	0.831025	0.884211	0.925831	0.900763	0.945409	0.94686	0.948478	0.981912	0.974719	0.954819	0.958333	0.994565	0.984615	0.982544	0.982808	1.00904	0.987768	1.00362	0.987288	0.973094	0.976636	0.983122	1.00356	0.978659	0.996904	0.966967	0.985423	1	0.964602	0.972125	0.96679	0.979508	0.968326	0.965517	0.975369	0.962617	0.981481	1.00448	0.980583	0.903553	0.942708	0.880208	0.86631	0.861111	0.858824
	1.3222	0.84466	0.787582	0.789298	0.824405	0.859838	0.908854	0.913158	0.928753	0.924812	0.916456	0.95082	0.954416	0.984277	1.01608	0.994286	0.994695	0.989583	0.970414	0.969325	0.981424	1	1.02262	0.990868	1.00483	1.01333	0.960289	0.996855	0.966154	0.990476	0.981928	0.987988	0.982196	1	0.92963	0.966527	0.972093	0.954774	0.960591	0.931507	1	0.977578	0.927536	0.935484	0.95288	0.944134	0.892473	0.872832	0.860465
	1.32209	0.832168	0.84058	0.798561	0.81759	0.848837	0.893855	0.900553	0.924479	0.952632	0.943243	0.965909	0.987578	0.970199	0.986755	0.990909	1.00277	1.0112	1.00315	0.990033	0.99	1.02024	1.01422	1.0101	0.989796	0.971698	0.984962	0.971519	0.98722	0.967427	0.990385	0.993808	0.990566	0.978799	0.996212	0.978632	0.971292	0.949239	0.964646	0.93722	0.955752	0.95614	0.959799	0.936842	0.927461	0.88587	0.878453	0.852273	0.8875
	1.32199	0.888031	0.836653	0.807087	0.836364	0.853968	0.882698	0.919771	0.935484	0.92876	0.942623	0.990712	0.946541	0.92953	0.996689	0.970501	0.967302	0.988796	0.974359	0.980263	1	1.02954	0.943925	1	0.944162	0.97235	0.953125	0.993355	0.996721	0.983444	0.990712	0.981073	1.00637	1.00357	0.940075	0.969697	0.972093	0.953846	0.960199	0.962963	0.983333	0.962343	0.935185	0.957447	0.916667	0.877005	0.835227	0.872093	0.899371
	1.32188	0.917012	0.851695	0.820961	0.793893	0.828671	0.879479	0.898089	0.908824	0.940341	0.926136	0.971519	0.986111	0.924188	0.989247	0.942424	0.979769	0.988338	0.986348	0.975352	1.02817	1.01747	0.9799	0.924242	0.983333	0.951691	0.979339	1.00348	0.976667	1.00344	1.00673	1.00339	0.947883	0.970696	1.00816	0.982609	0.990698	0.994898	0.984848	0.96347	0.953192	0.919679	0.944186	0.96875	0.893401	0.854167	0.847826	0.834286	0.888889
	1.32177	0.944915	0.900901	0.81982	0.807377	0.829545	0.874552	0.877133	0.914013	0.93913	0.943114	0.927215	0.925926	0.939394	0.969466	0.966997	0.990854	1.00608	1.01389	0.961131	0.971223	0.995575	0.994872	0.973262	0.942529	0.964286	0.966942	0.985401	0.986063	0.996479	0.99	1.00697	0.979798	0.977444	0.987755	1.00444	0.963303	0.955882	0.935644	0.966981	0.936709	0.953587	0.962617	0.921569	0.865385	0.869565	0.798942	0.847458	0.919255
	1.32166	0.943231	0.896226	0.855769	0.800885	0.790123	0.820611	0.882129	0.89547	0.891304	0.929936	0.906977	0.942652	0.94902	0.923664	0.975177	0.983607	0.98722	1.00741	0.98893	1.01521	1	0.967742	1	1.0407	0.967033	0.955947	0.933824	0.996282	1.00738	0.972125	0.924138	0.989474	0.961089	0.946281	0.99537	0.975962	0.979798	0.927536	0.891304	0.915966	0.909483	0.908257	0.961165	0.898551	0.812183	0.854839	0.910615	0.939024
	1.32155	0.933036	0.862559	0.812808	0.76	0.839286	0.828685	0.851562	0.845614	0.920962	0.955782	0.953901	0.942748	0.929688	0.956863	0.950704	0.969595	0.986441	0.969811	0.961977	0.992308	1.00465	0.989071	0.96648	0.963636	1.01714	0.977578	0.941634	0.980916	0.966667	0.944251	0.951219	0.962199	1.01587	0.974138	0.986111	0.971154	0.948718	0.984772	0.927602	0.944206	0.943231	0.939535	0.946078	0.877934	0.809756	0.865	0.873684	0.884393
	1.32144	0.971698	0.88835	0.865979	0.792453	0.801762	0.817021	0.869748	0.930233	0.876405	0.935018	0.932331	0.987755	0.965957	0.920319	0.948718	0.976027	1.00351	0.92126	0.980545	0.98419	0.972093	0.983871	0.977528	0.95858	0.907216	1.00465	0.980315	1	0.988281	0.962963	0.978261	0.996364	1	0.956522	0.976852	0.970149	0.978378	0.919598	0.953704	0.911017	0.912134	0.944186	0.902439	0.844037	0.858537	0.833333	0.935	0.945652
	1.32133	0.985437	0.924623	0.887179	0.822967	0.831776	0.824885	0.898617	0.902439	0.878431	0.914062	0.953782	0.930435	0.951111	0.949153	0.932331	0.978947	1.01786	1.01688	0.987654	0.971774	1.03398	0.956522	0.949721	1.01863	0.960894	0.949541	1.01619	0.944882	0.945736	0.996226	1	1.01509	0.975104	0.957447	0.976636	0.95098	1.01075	0.952381	0.949772	0.973913	0.962025	0.877828	0.845794	0.818605	0.830918	0.837963	0.92233	0.9375
	1.32123	0.952607	0.910995	0.85567	0.811594	0.835749	0.824645	0.829493	0.914027	0.891304	0.871369	0.945205	0.921296	0.92823	0.923767	0.939271	0.958333	0.97491	0.966527	0.942857	0.987342	1.0303	0.988827	1	1.04459	0.943182	1	0.97166	0.952569	0.988048	0.988593	0.984436	0.973384	0.9875	0.947598	0.943662	0.909524	0.989247	0.989418	0.9447	0.915612	0.895833	0.887892	0.870192	0.818182	0.876777	0.904762	0.960784	0.90099
	1.32112	0.972477	0.945	0.849741	0.852041	0.83	0.790476	0.866667	0.857143	0.893805	0.913636	0.947368	0.974747	0.94359	0.91866	0.912863	0.965251	0.992395	0.991632	0.970711	1.00431	0.973684	0.964497	1.02484	0.993711	0.971264	0.952607	0.953975	0.964286	0.971888	0.945946	0.960784	0.992395	1.00433	0.963134	0.971292	0.914573	0.968085	0.951872	0.938679	0.943478	0.885246	0.912442	0.902913	0.821429	0.874396	0.858491	0.926471	0.978947
	1.32101	0.990741	0.925	0.935484	0.867347	0.823232	0.805825	0.806763	0.864486	0.892523	0.929577	0.893204	0.908163	0.994444	0.969072	0.981132	0.939024	0.96124	0.995516	0.965368	0.986547	1.00532	0.968354	0.925926	0.936306	0.97561	1	0.906504	0.963415	0.979675	0.976096	0.996016	0.941406	1	0.968182	0.936585	0.962963	0.966851	0.964467	0.938095	0.929825	0.929167	0.843318	0.87619	0.830275	0.867924	0.889952	0.917073	0.949495
	1.3209	0.977169	0.950739	0.911458	0.89899	0.81592	0.79602	0.833333	0.857143	0.87037	0.964824	0.953368	0.926316	0.965517	0.935135	0.931707	0.944915	0.983193	0.972222	0.981982	0.986301	0.968586	0.975758	0.962733	0.992908	0.981366	0.960591	0.970213	0.979592	0.987448	1	0.955645	0.988095	0.977876	0.963134	0.969697	0.951872	0.971591	0.951087	0.938095	0.956522	0.90678	0.933014	0.817757	0.859155	0.855204	0.909091	0.952153	1.00524
	1.32079	0.990521	0.95	0.921569	0.859223	0.879397	0.795122	0.843434	0.866995	0.861244	0.898551	0.956757	0.956522	0.929825	0.960227	0.909091	0.962963	0.926724	0.980296	0.963134	0.962441	0.962162	0.95679	0.974194	1	0.942675	0.945274	1	0.921488	1.00433	0.953307	0.97561	0.956863	0.926407	0.926941	0.969072	0.950276	0.959538	0.924731	0.923077	0.9	0.870833	0.859729	0.814815	0.874419	0.915888	0.899083	0.92381	0.930693
	1.32069	1.01471	0.966019	0.969388	0.872642	0.868932	0.787736	0.80203	0.841584	0.877451	0.925373	0.875648	0.9375	0.905882	0.873563	0.953368	0.929907	0.968182	0.955	0.970874	0.960976	1	0.969136	0.948718	0.95302	0.890244	0.964103	0.973333	0.958848	0.966667	0.968627	0.967871	0.953125	0.973333	0.939252	0.922705	1.00549	0.964912	0.961538	0.911628	0.932735	0.906383	0.851852	0.834123	0.894977	0.912844	0.962617	0.927273	0.932039
	1.32058	0.981221	0.9799	0.945813	0.91866	0.830986	0.819512	0.802885	0.834951	0.843902	0.891626	0.905263	0.931034	0.916667	0.896552	0.903061	0.932692	0.957547	0.969231	0.984375	0.944444	0.988166	1.02649	0.980392	0.938776	0.91875	0.942408	0.95	0.986784	0.957447	0.956	0.972332	0.976096	0.911392	0.967136	0.974227	0.96875	0.944444	0.93617	0.918269	0.933333	0.896996	0.841629	0.828571	0.860987	0.904977	0.954338	0.963636	0.995215
	1.32047	1.01415	0.971014	0.974874	0.956311	0.882353	0.85782	0.791667	0.881517	0.800971	0.919192	0.894737	0.916667	0.928144	0.909605	0.93956	1.01587	0.94686	0.95288	0.917098	0.968586	0.99375	1.0137	0.966443	0.972973	0.969136	0.984043	0.942731	0.931507	0.973451	0.995833	0.948617	0.938697	0.982906	0.976415	0.959799	0.91623	1	0.930481	0.937799	0.885593	0.818182	0.87963	0.865741	0.896396	0.917808	0.931507	1.03774	0.976526
	1.32036	0.963636	0.92823	0.944724	0.906863	0.924528	0.837838	0.841629	0.818182	0.849765	0.873832	0.869347	0.926136	0.95	0.918605	0.907609	0.983871	1.01026	0.983516	0.923913	0.989071	1	0.965753	0.979167	0.992958	0.949367	0.944162	0.973568	0.982222	0.990868	0.938776	0.961089	0.979839	0.986726	0.958904	0.975	0.937173	0.913514	0.954315	0.951923	0.86383	0.907173	0.833333	0.846154	0.897778	0.950451	0.99095	1.02752	0.995238
	1.32025	0.990698	0.971154	0.889952	0.927536	0.916279	0.888393	0.840183	0.817391	0.785714	0.813953	0.869347	0.928962	0.89881	0.917647	0.950276	0.901478	0.897059	0.953757	0.933702	0.982759	1.01307	0.922535	0.934783	0.957747	1	0.989583	0.940425	0.932773	0.948052	0.92887	0.962343	0.937008	0.950893	0.948837	0.941176	0.892857	0.946237	0.932642	0.924528	0.929825	0.84739	0.868996	0.878924	0.912281	0.964602	1.00455	1.02283	1.01942
	1.32014	0.99061	0.980676	0.974619	0.919431	0.924883	0.885321	0.844749	0.824561	0.816964	0.844749	0.909091	0.900524	0.905882	0.889535	0.863158	0.969697	0.984694	0.938202	0.954023	0.96	0.993197	0.985507	0.948529	0.921986	0.94	0.952632	0.93913	0.927966	0.978448	1.00444	0.906122	0.987448	0.96875	0.943662	0.902913	0.928571	0.886598	0.905	0.857143	0.828571	0.819231	0.857759	0.882096	0.918455	0.991111	0.982301	1	1
	1.32004	0.980952	0.990148	0.955665	0.93578	0.944186	0.913636	0.890411	0.820961	0.804348	0.848214	0.880952	0.871287	0.88172	0.88764	0.956757	0.917073	0.945545	0.954802	0.972222	0.949438	0.928105	0.962963	0.963235	1	0.928571	0.951087	0.96347	0.965065	0.956522	0.940928	0.955102	0.946721	0.972477	0.904762	0.905	0.878173	0.917949	0.871287	0.869565	0.850807	0.823529	0.857741	0.927928	0.936709	0.991342	1	1.00433	0.946903
	1.31993	0.995122	1	0.989796	0.95814	0.90625	0.864035	0.883408	0.845133	0.825328	0.817391	0.837963	0.868932	0.890625	0.918033	0.942708	0.927536	0.934673	0.965909	0.966292	0.93956	0.961538	0.985611	0.977612	0.906475	0.946667	0.897849	0.920561	0.936073	0.973214	0.933884	0.974576	0.976096	0.956332	0.931707	0.91	0.967742	0.880208	0.896552	0.827004	0.833992	0.835165	0.893162	0.938053	0.922131	0.958678	1.00858	0.966102	0.991071
	1.31982	0.967136	1.02591	1.01053	0.953917	0.946429	0.902128	0.907895	0.82716	0.806723	0.791667	0.831776	0.846154	0.898477	0.873096	0.915094	0.919048	0.941176	0.923913	0.951087	0.955056	0.974194	0.956835	0.956522	0.992424	0.939189	0.944751	0.971154	0.927602	0.950893	0.957447	0.901235	0.926923	0.944915	0.915493	0.957895	0.935829	0.893617	0.890547	0.853448	0.854962	0.885609	0.904382	0.928571	0.952381	0.92549	0.987705	0.959514	0.954357
	1.31971	0.990338	0.935644	0.984293	0.937799	0.938053	0.95279	0.930736	0.854772	0.861925	0.857759	0.844037	0.827273	0.839806	0.868545	0.935185	0.936937	0.948837	0.972678	0.961749	0.920213	0.974684	0.992857	1.00746	0.985401	0.939189	0.928177	0.975845	0.961165	0.936364	0.915612	0.934211	0.915663	0.937239	0.930233	0.889447	0.859375	0.920904	0.836735	0.845815	0.864341	0.843416	0.918699	0.953975	0.94186	0.972112	0.957854	0.963855	1.00415
	1.3196	0.976415	0.951923	0.969231	0.962791	0.995413	0.946903	0.932203	0.916667	0.864	0.798419	0.815789	0.843318	0.836538	0.876147	0.917749	0.919492	0.912134	0.921951	0.963158	0.964467	0.932927	0.944056	0.965035	0.94964	0.921569	0.939227	0.913462	1.0197	0.930556	0.969697	0.922747	0.961864	0.940171	0.943925	0.919598	0.895833	0.861878	0.849741	0.824561	0.851406	0.888889	0.928571	0.938776	0.961977	0.976471	0.958647	1.01581	0.976378
	1.3195	0.966825	0.932692	0.969849	1	0.951754	0.965665	0.92562	0.899193	0.876923	0.836576	0.831933	0.834821	0.890476	0.924883	0.886555	0.918699	0.920635	0.961538	0.916279	0.970874	0.928994	0.927632	0.985714	0.985714	0.948387	0.98895	0.949074	0.930556	0.915929	0.956897	0.934783	0.966387	0.955556	0.957143	0.895735	0.885572	0.880435	0.835052	0.826484	0.879668	0.895911	0.96	0.995984	0.981132	0.98155	1.00369	1.02593	1.01141
	1.31939	1.00495	0.975728	0.955	0.995305	1.00455	0.961373	0.937759	0.908	0.889328	0.862745	0.808	0.805085	0.828704	0.922018	0.884774	0.914062	0.904215	0.937778	0.923767	0.919643	0.960452	0.933333	0.925676	0.907285	0.986842	0.934426	0.900901	0.959459	0.938596	0.924051	0.868852	0.92887	0.936364	0.947368	0.858491	0.924242	0.863636	0.852041	0.824074	0.898734	0.942085	0.970464	0.9625	0.960432	0.981818	0.996269	1.00364	0.988764
	1.31928	0.966184	0.946341	1	0.985646	0.952991	0.974249	0.92623	0.918919	0.906015	0.857143	0.791667	0.841667	0.8	0.866379	0.870079	0.904215	0.898496	0.939655	0.936975	0.927039	0.927835	0.98125	0.937107	0.993378	0.944785	0.948186	0.951111	0.934783	0.919492	0.899582	0.953192	0.92623	0.903084	0.896861	0.892019	0.876238	0.816425	0.827907	0.856522	0.862903	0.908745	0.935223	1.02075	0.942029	0.967857	0.982877	0.989547	1.05747
	1.31917	0.953271	0.980769	1.00515	0.959459	0.928571	0.987288	0.971774	0.939623	0.965649	0.894737	0.815789	0.826772	0.821739	0.844	0.854478	0.913669	0.894928	0.92	0.903226	0.953782	0.948186	0.923529	0.993631	0.928571	0.918129	0.892157	0.986487	0.945378	0.927711	0.937255	0.908367	0.928571	0.913793	0.880734	0.901961	0.841584	0.831683	0.823529	0.841004	0.876866	0.961538	0.941176	0.995885	0.966038	0.977612	0.95	1.01042	0.98951
	1.31906	1.01422	1.0198	0.975369	0.96347	0.949791	0.929134	1	0.964844	0.892473	0.876812	0.857678	0.834677	0.811475	0.835294	0.862816	0.893471	0.902685	0.913726	0.922449	0.929752	0.935644	0.920904	0.931429	0.910112	0.905556	0.889952	0.956897	0.938525	0.925197	0.87037	0.934109	0.902344	0.930435	0.929907	0.868293	0.883838	0.835821	0.847222	0.836653	0.923954	0.934783	0.927711	1.0087	0.953668	0.977099	0.96831	0.986063	1.00351
	1.31896	0.981481	0.976959	1.00481	0.960526	0.946058	0.960159	0.933594	0.93633	0.939068	0.877622	0.89313	0.85214	0.829876	0.830709	0.828671	0.834921	0.917219	0.857143	0.933333	0.940476	0.915493	0.918919	0.932584	0.922652	0.917098	0.933333	0.908	0.968379	0.917293	0.914498	0.910394	0.893382	0.906504	0.896104	0.861905	0.826923	0.864734	0.889423	0.877551	0.92674	0.961538	1.004	1.03404	0.956522	0.988417	1.02583	0.98913	1
	1.31885	1.00457	0.936364	1.01923	0.960699	0.97561	0.971545	0.941406	0.949275	0.932624	0.925267	0.944238	0.826415	0.856557	0.814672	0.835664	0.817891	0.883281	0.886447	0.915129	0.912548	0.931507	0.90625	0.941176	0.925134	0.930693	0.932489	0.902985	0.900735	0.920755	0.939164	0.904594	0.926573	0.911197	0.864407	0.862385	0.84466	0.875622	0.87963	0.873518	0.956364	0.944444	0.992366	0.975708	0.972763	0.980392	1.00755	1.00749	0.989247
	1.31874	1.04206	0.96875	0.981567	0.96281	0.971429	0.996139	1.01158	0.97417	0.958042	0.971326	0.916364	0.893536	0.844961	0.84375	0.853659	0.866667	0.848024	0.898551	0.890411	0.904255	0.902542	0.916256	0.888325	0.947368	0.922018	0.910853	0.942652	0.905923	0.923636	0.913194	0.85906	0.906574	0.88172	0.891566	0.853982	0.853081	0.874396	0.858447	0.876448	0.942652	0.945946	0.981203	0.984496	1.00741	1.00766	1.04215	1.02372	0.98524
	1.31863	0.990868	0.977064	1.02315	0.959677	0.98	0.988806	0.984906	0.985765	0.905537	0.989583	0.932862	0.9	0.854962	0.837638	0.780731	0.787879	0.807808	0.881119	0.916388	0.9375	0.89916	0.923445	0.875	0.891626	0.954751	0.877698	0.930693	0.915858	0.892857	0.848297	0.884868	0.87013	0.854167	0.816176	0.844156	0.839827	0.884444	0.887892	0.88764	0.935943	0.965753	0.985455	0.981132	1.01075	0.960854	0.985348	0.996183	0.992337
	1.31852	0.96861	0.981481	0.977578	1.02954	0.996047	0.977528	0.981949	0.972881	0.97	0.930921	0.928082	0.932143	0.888889	0.832727	0.824916	0.814024	0.80531	0.839465	0.842444	0.88961	0.873016	0.891403	0.871429	0.884058	0.930131	0.90493	0.898773	0.879056	0.863502	0.85	0.867257	0.858025	0.853242	0.82397	0.859504	0.8583	0.858333	0.92735	0.954717	0.982332	0.960656	1.03371	0.973978	0.982759	0.932432	0.978495	0.996296	0.99631
	1.31842	0.973913	0.963964	0.981735	0.967611	0.937269	0.938849	0.971429	0.996678	0.987097	0.923567	0.906667	0.899306	0.892857	0.842105	0.795031	0.795918	0.786517	0.83612	0.874214	0.858974	0.896154	0.923767	0.896396	0.927885	0.8583	0.87541	0.901734	0.891061	0.86119	0.866477	0.855978	0.811798	0.818182	0.843066	0.862348	0.866142	0.928	0.897638	0.932143	0.979522	1.00977	1.0036	0.98155	0.978799	0.946809	0.982877	1.05455	0.978495
	1.31831	0.939655	1.00901	0.968182	0.995918	0.996198	0.996429	0.968531	0.973771	0.943925	0.977273	0.947195	0.878689	0.909091	0.876289	0.816265	0.807471	0.780282	0.810289	0.826219	0.853968	0.866412	0.932735	0.883929	0.92891	0.870968	0.876582	0.890141	0.841823	0.872629	0.862434	0.873315	0.829333	0.855828	0.84375	0.833333	0.8659	0.926923	0.914894	0.972973	0.948485	1.03859	1.00348	1.01141	1.00707	1.03226	1.00702	1.01706	0.97619
	1.3182	0.977974	0.974359	1.00452	1.03279	1.03409	0.972414	1.00347	0.977492	0.968944	0.960123	0.925466	0.912903	0.915194	0.901695	0.803519	0.788462	0.781081	0.805643	0.810398	0.85625	0.87037	0.857759	0.870536	0.84375	0.868217	0.885093	0.867924	0.848718	0.821883	0.831234	0.822055	0.808458	0.828652	0.847826	0.873239	0.913858	0.900735	0.931507	0.987421	0.965714	0.985673	1.00328	1.01742	0.983389	0.966102	1.02381	1.01365	1.00346
	1.31809	0.970339	0.970213	0.965065	0.96371	0.992593	0.985866	0.972973	0.932722	0.975232	0.984568	0.962963	0.915625	0.920962	0.912752	0.870871	0.824022	0.793566	0.801242	0.808383	0.842767	0.823529	0.865801	0.858407	0.857143	0.854406	0.866261	0.867725	0.833333	0.84131	0.817102	0.803782	0.786385	0.794195	0.90991	0.892508	0.890034	0.935252	0.969492	0.952239	0.956757	0.973958	1.02454	0.99361	0.996835	0.961039	1.00332	1.02414	1.02076
	1.31799	0.978814	0.964912	1.00897	0.941176	0.95053	1.0365	0.949495	0.957187	0.952802	0.965116	0.948949	0.949686	0.95189	0.894231	0.877551	0.839572	0.813953	0.797546	0.777126	0.824926	0.848708	0.847458	0.852174	0.843049	0.824427	0.835329	0.846354	0.804938	0.826303	0.82381	0.782511	0.811791	0.837975	0.875706	0.900621	0.937086	0.968085	0.925566	0.938202	0.989583	0.959036	1.01081	0.945402	1.01208	0.987302	0.996743	1.01324	1.0068
	1.31788	1.0084	0.983122	1.01304	0.949612	1.00738	0.97619	0.996667	0.963077	0.971014	0.980057	0.955752	0.939759	0.957929	0.929448	0.885475	0.871134	0.846354	0.804734	0.792717	0.788732	0.795139	0.838174	0.844156	0.823529	0.798535	0.788571	0.805	0.826923	0.812352	0.802247	0.793028	0.803419	0.845783	0.899456	0.868195	0.9625	0.95	0.972393	0.962366	0.9875	0.99536	0.997382	0.958904	0.983784	1.01441	0.996933	1.03215	1.01667
	1.31777	0.978261	0.95	0.974576	0.954373	0.975	0.996564	0.966887	0.957055	0.961988	0.982659	0.947674	0.944118	0.934985	0.914634	0.910082	0.8875	0.8523	0.873156	0.79558	0.772603	0.824561	0.836066	0.838983	0.845188	0.810409	0.773256	0.804938	0.796253	0.769932	0.799555	0.799145	0.820513	0.86014	0.940104	0.90113	0.969789	0.953846	0.951841	0.963542	0.967059	0.97931	0.987212	1.01093	0.997494	1.01333	0.99435	1.01238	1.03834
	1.31766	1.02242	0.957983	0.9875	0.996094	0.950877	1.03401	0.976667	0.96988	0.956268	0.952113	0.953216	0.913793	0.947205	0.973214	0.914062	0.915254	0.879902	0.852368	0.841962	0.812849	0.816949	0.789883	0.7751	0.845188	0.793594	0.752841	0.806295	0.8125	0.791762	0.802966	0.8361	0.857143	0.875	0.919512	0.952646	0.951705	0.971429	0.997238	0.997531	0.988987	0.949367	1.02835	1.0026	0.971292	1.02736	1.03618	1	1.04242
	1.31756	1.01322	0.982301	0.987448	1.01167	1	0.963576	0.966997	0.974922	0.946479	0.98324	0.9941	0.982143	0.990415	0.938053	0.92228	0.898383	0.895349	0.893557	0.837696	0.871233	0.844068	0.826255	0.816733	0.820408	0.783688	0.786111	0.785203	0.774049	0.819635	0.817227	0.816901	0.864542	0.896703	0.907143	0.965241	0.94429	0.988764	0.968586	0.94843	0.973523	1.02075	0.997608	0.994987	0.995227	0.990408	1.01165	1.03258	0.973545
	1.31745	1.03211	0.95614	0.982684	1.00772	0.965398	1.01974	0.96732	0.990566	0.964809	0.980057	1.01994	0.954023	0.978328	0.966867	0.948586	0.941995	0.938497	0.906915	0.856041	0.8509	0.823344	0.826415	0.824219	0.86166	0.795848	0.814917	0.816514	0.809955	0.819383	0.855072	0.868687	0.89662	0.92094	0.938824	0.96063	0.966942	0.975544	0.972081	0.969499	0.991968	1.00786	0.984375	0.976415	1.00915	1.01869	1.03953	1.02535	1.03571
	1.31734	0.995633	0.969432	0.95339	1.00787	0.964539	0.981481	0.996904	0.970501	0.957627	0.972826	0.967213	0.997085	0.952096	0.957055	0.952255	0.928241	0.933036	0.92126	0.880096	0.902256	0.879257	0.879121	0.841699	0.838462	0.821549	0.808673	0.848624	0.846827	0.854701	0.876797	0.908184	0.908915	0.936306	0.952164	0.950617	0.955959	0.979003	0.973105	0.971253	0.981132	1.00745	1.03648	0.993274	0.997854	1.00436	1.02165	1.02902	1.00444
	1.31723	1.01717	0.969697	0.973799	0.992157	0.982394	0.965625	0.966967	0.971831	1.00287	0.960106	0.986188	0.97151	0.987842	0.970501	0.938992	0.947242	0.941834	0.930233	0.912833	0.915	0.873112	0.897436	0.873563	0.829545	0.836013	0.863049	0.849138	0.85654	0.8357	0.887129	0.90856	0.951076	0.951477	0.968036	0.960298	0.969152	0.963731	0.96028	1.0042	0.988764	0.990942	0.994048	0.985138	1.02495	0.981328	1.03871	0.978858	0.970402
	1.31713	0.995763	0.974684	0.936709	0.965517	0.971119	0.986928	0.962209	0.968571	0.961003	0.968421	0.967302	0.988304	0.985119	0.927374	0.976127	0.915493	0.925508	0.931937	0.930456	0.919708	0.905044	0.891986	0.897436	0.865248	0.871473	0.875634	0.867368	0.888889	0.892713	0.873805	0.906593	0.94162	0.960663	0.975281	1.01535	0.989474	0.982051	0.983373	0.962376	0.98725	1.01246	1.00198	1.0021	1.02339	1	0.992032	1.02954	0.993506
	1.31702	0.976096	1.02449	0.970213	1.00389	1.00357	0.966777	0.996753	0.971098	0.983607	0.978947	0.994475	0.991379	0.982249	0.933884	0.96144	0.95962	0.961538	0.945876	0.927361	0.910959	0.933526	0.955172	0.909408	0.890845	0.877301	0.852459	0.881764	0.91498	0.90297	0.914972	0.923077	0.931095	0.956522	0.958785	0.976134	0.982544	0.984615	1.01179	0.990079	0.99115	0.988156	1	1.02658	0.988868	1	1	1.02621	0.989817
	1.31691	1.02724	0.946154	0.984	1	1.01068	0.973941	0.964744	1.01524	1.00576	1.01362	0.964187	0.965714	1	0.969274	0.929648	0.980952	0.947727	0.948849	0.938242	0.957747	0.953757	0.952218	0.900344	0.921769	0.906706	0.910377	0.9	0.905303	0.932171	0.930657	0.924694	0.954466	0.968872	0.995708	0.983529	0.990099	0.987835	0.993119	0.978968	1.00351	1.01877	1.02652	0.998	0.996282	0.994393	1.01883	1.03488	1.00771
	1.3168	1.00364	0.978022	0.981273	0.918367	0.990099	1.01324	0.971519	0.967552	1.00845	0.946667	0.997275	0.991453	0.979592	0.975676	0.984925	0.972158	1.02558	0.963918	0.913551	0.923611	0.942029	0.952218	0.948805	0.929766	0.921053	0.920635	0.934236	0.921642	0.91573	0.941281	0.953925	0.962649	0.95539	1.00209	0.995327	0.97619	0.961722	1.00226	0.988743	1.00691	0.996732	1.01667	0.996094	0.987478	0.974592	1.01465	1.02578	0.998145
	1.3167	1.04317	0.951557	0.952899	0.993464	0.987768	0.978528	0.984568	1.02367	0.994382	1	0.978261	0.99422	1.00847	0.973404	0.959906	0.951111	0.957303	0.948849	0.960591	0.970149	0.963526	0.939502	0.948097	0.94863	0.939655	0.941441	0.910584	0.925183	0.962162	0.953528	0.948161	0.970297	0.988722	0.989817	0.993289	0.961098	0.974239	0.986985	1.00942	0.998322	1.04112	0.998214	1.0019	0.992895	0.968966	0.998205	1.04436	0.998185
	1.31659	1	0.969388	0.975352	0.981538	0.976676	0.98	0.979351	0.961111	0.962567	0.986226	1.00284	1.00865	0.93913	0.951872	0.954654	0.931567	0.96868	0.992228	0.945107	0.969543	0.993958	0.967391	0.971326	0.97193	0.923077	0.936404	0.937736	0.932971	0.959649	0.96173	0.9616	0.967897	0.976449	0.972332	0.99345	0.993088	0.983721	0.972973	0.967684	0.988746	0.993721	1.02151	1.02718	1.02113	1.00178	1.02313	1.02	1.02588
	1.31648	1.02121	1.00327	1.0066	0.98503	0.99169	0.994778	0.980822	1	1.00798	1.00802	1	0.983051	1.00606	0.972678	0.961631	0.974576	0.954262	0.967581	0.959906	1.00721	0.955882	0.989362	0.978723	0.942373	0.954286	0.936957	0.95438	0.983725	0.962649	0.947883	0.970126	0.979907	0.98087	0.962121	1.01489	0.991091	0.986333	0.946108	0.978947	0.995238	1.00156	1.00344	1.00371	0.994915	0.967354	1.02977	1.04293	0.973404
	1.31637	0.981481	0.951149	0.972973	0.988439	1.01872	0.9675	1.01323	0.992424	0.97555	1.01312	0.973684	0.954424	1.0209	0.978022	0.967059	0.974414	0.968685	0.93617	0.945455	0.965438	0.984985	0.971831	1.02158	0.971326	0.941176	0.944444	0.951762	0.941489	0.962712	0.928	0.955385	0.968657	0.98495	0.971963	0.991753	0.997836	0.991111	0.983773	0.981293	0.978295	0.979198	1.0378	1.00361	0.991625	1.00172	1.02573	1.03333	1.01423
	1.31627	1	0.951531	1.01676	0.973615	0.974811	0.9975	0.975062	1.00928	0.984305	1	0.963054	1.00777	0.969697	0.986595	1	0.957173	0.987603	0.995049	0.97235	0.952055	1	0.941781	0.933555	0.968641	0.924856	0.962472	0.943396	0.960993	0.963333	0.958074	0.969419	0.994039	0.975728	1.00534	1.00813	0.995717	0.981092	0.988119	1.00334	0.98827	1.01159	1.01159	0.980936	0.981848	1.01689	1.00168	1.00334	0.984642
	1.31616	0.993039	0.985714	0.971014	0.97852	0.965116	0.983412	0.955916	0.997793	0.972632	0.976035	1.0339	0.967337	0.984	0.997368	0.981221	1	0.971311	0.978155	0.988372	0.972286	1.01729	0.979381	0.985765	0.925926	0.937322	0.933333	0.962756	0.977778	0.960884	0.963837	0.985008	0.955817	1.00643	1.00694	0.988439	0.989754	1.0251	0.958412	0.990244	0.994278	1.01403	1.03268	1.0119	1.0197	0.991909	1.01292	1.01322	1.00503
	1.31605	1.02506	1.0068	1.00227	0.978541	1.00858	1.01333	0.982609	0.974249	0.977178	0.966805	1.00674	0.997625	0.982051	0.982587	0.975556	0.989384	0.976793	0.997506	0.956019	0.983373	0.991379	0.966777	0.986207	1	0.953757	0.935556	0.957611	0.964552	0.953571	0.969453	0.983206	1.00148	0.982143	0.991166	0.992263	0.992	1.02062	0.985158	0.979751	0.994302	1.00138	1.00797	1.00167	1.014	0.990476	1.05281	1.00486	1.01508
	1.31594	0.997807	0.975771	0.991342	1	0.990385	0.992322	0.986381	0.975952	0.960239	0.996008	0.96701	1.0235	0.979118	0.96729	0.980349	0.967936	0.975659	0.985577	0.993023	0.988372	0.974648	0.973333	0.949664	0.989619	0.973451	0.97973	0.959223	0.980732	0.962025	0.958472	0.99689	0.976505	0.989045	0.991525	1.01367	0.992308	1.0099	0.98018	0.990783	1.0125	1.00407	1.02665	1.01144	0.982169	0.987749	1.0156	1.00468	1.00645
	1.31584	1.01747	0.987069	0.953878	0.991853	0.987085	0.99823	0.994728	0.990876	0.959781	0.992352	0.984252	1	0.967532	0.993363	0.978992	1.0099	0.971319	0.976581	0.945652	0.952381	0.991597	0.99	0.980066	1.00694	0.961538	0.981818	0.986538	0.95539	0.972973	1	0.987159	1.01858	0.99341	0.993019	1.01161	1.00786	0.988166	0.972222	0.983631	1.01626	0.992105	1.00602	1.01923	1.02269	1.02937	1.00751	1.02782	1.00628
	1.31573	0.985201	0.969199	1.0235	0.969868	0.987633	0.994898	0.988176	1.01165	0.980519	0.985891	0.998141	1.00975	0.958506	1.00839	0.986408	0.994361	0.97037	0.988764	0.976546	0.997748	0.994253	0.970297	0.961415	0.969388	0.962963	0.960613	0.964684	1	0.967971	0.980198	0.970827	1.00809	0.98	0.968366	0.994129	1.01139	0.980843	1.00896	1.00147	1.01995	1.01548	1.01608	1.02022	0.989706	0.998523	1.01327	1.03163	1.01515
	1.31562	1.00415	0.995833	0.966203	0.981378	0.964587	0.99	0.969106	0.984639	0.980655	0.99684	0.989761	0.989051	0.950787	0.990234	0.9625	0.998276	1.00364	0.985106	0.985356	0.99115	0.975676	0.970492	1.01316	0.977124	0.957507	0.980603	0.962832	0.966312	0.983725	0.973466	0.967136	0.991974	0.983137	1.00372	1.00191	0.988701	0.988528	1.01627	0.98987	0.988327	1.00635	1.03305	1.01212	0.995726	1.02647	0.992898	1.02515	0.988166
	1.31552	0.988048	0.967413	0.974308	0.998131	0.988215	1.01466	0.988746	0.95942	0.977044	0.981241	0.998462	0.979275	0.998066	0.980989	0.977702	0.993421	0.993559	0.992048	0.986	1.01702	0.986523	0.984026	0.980392	0.980198	0.955923	0.970021	0.969259	1.00536	0.941781	0.970443	0.978056	1.00162	0.988075	0.969203	0.994186	0.988506	0.992352	1.00888	1.00291	1	0.995929	1.02262	1.0181	0.997249	1.02899	1.01146	1.00881	0.997024
	1.31541	0.98855	0.98249	0.982072	0.980287	0.986733	0.976672	0.992038	0.991329	0.972145	1.01678	0.994211	1.00469	0.994746	0.990975	0.978333	1.00158	1.01555	1.0206	1.0056	0.970703	0.977387	1.0061	0.972222	0.970684	0.969863	0.962025	0.994652	0.969231	0.976391	0.977124	0.984472	0.965891	1.02062	1.01664	0.980469	1.00398	1.02579	0.998236	0.975146	1.00137	1.01664	1.003	1.03733	1.01543	1.0227	1.00279	1.03774	0.989899
	1.3153	0.98835	1	1.01383	0.980634	0.955882	0.993651	0.99374	0.974212	0.997241	0.991758	0.985836	0.988113	0.985197	0.993432	0.99682	0.981735	0.977545	0.985891	0.967354	0.987156	0.954106	0.994152	0.975976	0.96	0.936675	0.960251	0.98574	0.961214	0.979452	0.990491	0.978295	0.993769	1.00686	0.988909	1.01629	0.978088	1	1.00371	0.969027	0.992938	1.01648	0.989264	1	0.987671	0.993094	1.00139	1.02432	0.994135
	1.31519	0.987132	0.964151	1.0019	0.972789	0.97327	0.996899	0.98494	0.994211	0.997249	0.986357	1.01264	1.00439	0.981453	0.989537	0.967236	0.998563	0.992806	0.998264	0.977273	0.967427	0.986755	0.977778	0.985163	0.994048	0.979058	0.97556	0.994624	0.979021	0.996558	0.98254	0.986322	1.00628	1.02397	0.988593	0.997934	1.0211	1.01048	0.975238	0.976266	0.997106	1.02729	1.0414	1.00658	1	1.01156	1.0098	1.01422	1.00581
	1.31509	1	0.996255	0.986965	0.974874	0.995261	0.980031	0.975867	0.969359	1.01644	0.997301	1.00829	0.989855	0.971429	0.977305	0.992136	0.989924	0.988174	0.972313	0.973479	1	1.01253	1.01031	0.978022	0.974576	1.00765	0.960152	0.981197	0.978003	0.978188	0.98576	0.989568	0.990868	1.00858	1	1.00406	0.991786	1.02049	0.984615	0.991948	0.989855	1.00676	1.01524	1.00985	1.0091	1.00597	1.00278	0.998603	1.01004
	1.31498	1.01411	0.97007	0.980702	0.969106	0.995434	0.989676	1.00878	0.9729	0.97619	0.996027	1	0.989086	1.00296	1.00414	0.973585	0.982538	0.98467	1.00452	1.00291	0.977477	1.02595	1.03686	0.974227	1.00272	0.966981	0.981618	0.980614	1.00326	0.980424	0.996825	0.977778	1.01685	0.972177	1.00548	0.997963	1.00636	0.989691	0.990157	1.00167	1	1.02453	1.02932	1.01515	1.01393	0.998403	0.995556	1	1.01039
	1.31487	1.01186	0.957699	0.993289	0.970497	0.972583	1.00143	0.995839	1.00268	1.02767	0.989848	1.00132	0.991848	0.998584	0.991848	0.984069	0.990826	0.982022	1.00408	1	0.985423	1.00762	1.00451	0.997647	0.980149	0.976546	0.979203	0.976959	0.978626	0.98626	0.974359	0.965909	0.992733	1.0016	1.01971	1	1	0.997955	0.990458	0.984051	1.02985	0.998567	1.02318	1.00165	0.978038	1.00472	0.978723	1.01067	1.00308
	1.31477	1.00336	1.0069	1.00846	0.992296	0.984353	0.995851	0.993132	0.985788	0.997459	0.992376	0.998677	0.987871	0.995816	0.998672	0.970203	1.00684	0.979821	1.01486	0.987342	1.0096	1.00175	1	1	0.952489	0.956439	0.988906	0.991098	0.991045	0.974063	0.967376	1.00141	0.974895	1	1.00521	1.00595	0.961924	0.995951	0.988764	0.983871	0.992775	1.01719	1.02791	1.01358	0.997037	0.998454	1.01082	1.02117	0.993691
	1.31466	1.02269	0.977199	0.993661	0.993958	0.982118	0.958388	0.970509	0.988447	0.988861	1.00617	1.00511	1.00133	0.984743	0.994709	0.969448	1.00664	0.99889	0.990667	1.0213	1.00261	0.996627	0.997984	0.964657	0.993407	0.969534	0.967651	0.98248	0.978873	1.0043	0.995907	0.993481	1.0097	1	1.01906	1.01524	1.02236	0.995951	1.0325	0.990491	1.01441	0.998584	1.00637	1.00343	1.01562	0.987635	0.998415	0.993538	0.990338
	1.31455	0.990521	0.982567	0.962906	0.986957	0.972222	1.0013	0.992238	0.989051	0.996386	0.989234	1	0.998695	0.995879	0.985788	0.990654	0.982851	0.99027	0.976714	0.984524	0.998752	0.981424	0.994307	1.00593	1.00422	0.965928	0.95739	1.00995	0.974587	0.986807	1	1.01627	1.00253	0.983776	0.983471	1.02072	1.01181	1.01581	1.00356	1.00634	1.00989	1.02358	1.01254	1.00656	1.01246	1.01429	1.00778	1.00471	0.990385
	1.31444	1	0.959438	0.99362	0.978962	0.985372	1.00384	0.970996	0.991627	0.993023	0.994125	0.99388	1.01693	1.01226	0.978562	0.989571	0.982888	1.00542	0.989937	0.991784	1.01988	1.00766	0.99635	0.98482	0.968627	0.97651	0.988016	0.982558	0.972789	0.996377	0.954217	1.00472	0.997685	1.00823	1.00482	1.00919	0.996176	0.990366	0.954861	1.01378	0.993056	1.02313	1.00909	1.01942	1.01042	1.02164	1.00782	1.03662	1.01774
	1.31434	1.01276	0.986175	0.967456	0.995856	0.988402	0.992574	0.957473	0.995311	0.981216	0.986652	0.978923	0.971848	1.02148	1.00494	0.978959	0.978373	0.995781	1.01247	0.989571	1.01832	1.02607	1.01089	1.01509	0.983271	1.00478	0.976654	0.954148	0.998922	0.996771	0.983498	0.992274	1.00328	0.998739	1.00741	1.05699	1.00898	1.01311	0.986063	0.980994	1.01482	1.01316	1.00884	0.983257	0.998557	0.994074	1.00597	1.03583	1.00475
	1.31423	1.0066	0.973479	0.989855	0.986376	0.983668	0.986699	0.9807	0.98641	0.976796	0.99888	0.992018	1.00482	0.987163	0.991576	0.99345	0.984615	0.978593	1	0.966781	0.991726	0.998512	0.987589	0.989091	1.01294	0.983051	0.974515	0.984009	0.992746	0.988741	0.986694	0.986855	1.01446	1.01975	0.99177	1.00149	1.00327	1.00707	0.995058	0.971671	1.03298	1.01802	1.0273	1.00596	1.01117	1.00282	1.00418	1.04518	1.00752
	1.31412	0.982847	0.976471	0.983129	0.99455	0.988848	0.976498	0.98111	0.997722	1.01443	0.983731	0.988649	0.977726	1	0.996479	0.981779	1.00511	1.00503	1.01214	0.985092	0.980117	0.986607	0.99297	1.00368	1.0128	0.946889	0.976581	0.989796	1.00305	0.972441	0.999016	0.987985	0.991501	0.997738	0.989664	1.02193	1	0.977707	1.00627	0.998619	1.0305	1.0285	1.03125	1.01189	1.01642	0.991792	1.01501	1.02168	1.00875
	1.31402	0.993031	0.959578	1.0152	0.994318	0.989962	1	0.996512	0.968202	1.00215	0.981562	1.00337	1.00707	0.997512	0.973333	0.958078	0.99707	0.983701	1.01156	1.0022	0.987254	1.02343	0.969125	0.987544	1	0.959701	0.986951	0.974232	0.988439	0.976767	0.996262	0.994737	0.994624	1.00628	1.00243	1.01261	1.0186	1.00293	1.00721	1.01724	1.00597	1.01548	1.02885	1.01136	0.990654	1.01626	1.01447	1.03168	1.02241
	1.31391	0.993019	1.0146	0.994709	0.981846	0.979839	1.00957	0.979381	1.00109	0.97921	1.00647	0.978818	0.991954	0.993812	0.998857	1	0.986768	0.992263	1	0.978925	1.01831	1.01747	0.986371	0.987589	0.996422	0.960411	0.976717	1.00402	0.97151	0.97191	0.98915	0.990468	1.01329	0.996059	0.995402	1.00672	1.0113	1.00432	0.972074	0.984524	0.983731	1.02208	1.02601	1.00972	1.0184	1.00131	1.02362	1.00789	0.998663
	1.3138	1.03293	0.989418	0.982456	0.948837	0.982955	1.00376	0.982164	0.966845	0.995902	0.992746	0.996689	0.990805	0.987952	0.981027	0.987667	1.00093	1.01143	1.00903	0.994775	0.990121	1.01536	0.986622	0.991379	0.982818	0.983895	0.977038	0.986341	0.975379	0.980538	0.995591	0.987448	0.995629	0.994253	1.00988	0.994994	0.986911	0.991585	0.971867	0.989328	1.00887	1.0185	1.01467	0.990826	1.01633	1.01285	1.02302	1.02111	1.00908
	1.3137	0.986301	0.967185	0.97973	0.99375	0.97554	1	0.97707	0.984091	0.989701	1.01537	0.986287	0.994318	0.990442	0.985635	0.97449	0.992481	0.989021	1.00558	0.9857	0.984962	0.995879	1.01153	0.971572	0.983108	0.966197	0.992081	0.985409	0.981678	1.0028	0.982348	0.977254	0.994132	0.976657	1.01512	0.989461	1.005	0.970052	0.968828	1.0148	0.995296	1.00573	1.02775	1.01389	1.00598	1.01242	1.02384	1.00911	0.997455
	1.31359	0.998302	0.984293	1.00169	0.968036	0.981077	0.969402	0.972789	0.99388	0.992489	1.01527	0.998946	0.988004	0.995365	0.987193	0.995984	0.987376	1.0083	1.0119	0.995943	1.02882	1.03444	1.01135	0.991708	0.986689	0.980392	0.982202	1.00193	0.968343	0.980501	0.975737	0.990212	0.999182	0.99724	1.00715	1.00342	0.996437	1.01574	1.00696	0.972332	0.99726	1.00805	1.02878	1.01379	1.00338	1	1.02021	1.03504	1.00504
	1.31348	0.975288	0.98325	0.973984	1.00454	0.973239	0.972603	0.97832	0.972938	0.970828	0.990395	0.984359	0.971185	1.02483	0.995833	0.980392	0.981416	0.999116	1.00214	1.017	1	1.00937	0.993779	0.996805	0.983793	0.959294	0.977395	0.975701	0.991736	0.96477	0.993955	0.982301	1	0.992864	1.02155	1.03125	0.99656	1	0.988323	0.990792	0.986911	1.01654	1.01929	1.02654	1.01471	1.00573	1.02275	1.00807	0.990665
	1.31337	0.98495	0.966102	0.97	1.0142	0.974322	0.984701	0.979253	0.97365	0.996178	0.989387	0.978482	0.994401	1.00229	0.97428	0.994313	1.00613	0.994624	1.00433	0.979269	0.995876	0.996129	0.98752	0.99026	0.977564	0.990371	0.992449	0.998155	0.995421	0.992754	0.988822	1.0008	1.00572	1.00362	1.01296	1.00872	0.989808	1.00929	1.01933	0.996374	1	1.01441	1.00604	1.00726	1.0109	1.01086	0.984946	1.01204	0.997795
	1.31327	1.00822	1	0.985	1.00922	0.965714	0.979424	0.983584	0.968709	0.998729	0.987516	0.998742	1	0.991607	0.977778	0.984891	0.981067	1	0.991471	1.01448	1.00421	0.981627	0.984177	0.995049	0.995161	0.99455	0.951832	0.973419	0.960396	0.983636	0.972626	0.993426	1.00248	1.01568	1.01013	1.0102	1.02375	1.00235	1.01166	1.00271	0.996724	1.01484	1.01303	1.02944	0.994214	1.01667	0.991761	1.0246	1.02148
	1.31316	1	0.967593	0.971654	0.984035	0.99316	0.992	1.00267	0.974074	0.992762	0.991272	1	0.983565	1.01372	0.986229	0.981735	0.980426	0.997479	1.00714	1	1.01729	1.03179	0.992224	1.00489	0.981481	0.968545	0.976362	0.983842	0.993897	0.991409	0.981697	0.986781	0.980111	1.01339	1.00888	0.995556	1.00924	0.98307	0.986855	0.991319	0.99361	1.01817	1.02399	1.00967	0.977231	1.02984	1.00674	1.01488	1.017
	1.31305	1.00748	0.958904	0.976672	0.994269	0.991814	0.968709	0.976804	0.982609	0.990315	0.976134	1.01018	0.98294	1.00271	0.977604	0.985323	1.00345	0.993383	1.00301	0.988593	0.981	0.983204	1.03215	1.01536	0.987402	0.978233	0.971458	0.976449	0.999108	0.989865	0.993405	0.973645	0.998444	0.990325	1.01072	1.00441	1.00694	1.01394	1.02204	0.999137	1.00944	1.01925	1.0277	1.02334	0.982639	0.993513	0.998155	1.02448	1.019
	1.31295	0.977333	0.974286	0.980882	0.975241	0.980341	0.988506	0.991228	0.990184	0.98351	1.00977	1.01247	0.997386	1.00135	0.988109	0.964876	1.01021	0.996581	0.985958	0.986072	1.0051	1.00642	1.00624	0.979866	0.983923	0.989333	0.965021	0.995459	1.02156	0.99326	0.98336	1.00221	0.992319	1.00253	1.00478	1.00536	0.996652	0.992099	1.00727	0.996522	1.0023	1.01376	1.02005	1.00458	0.985544	1.01154	1.00534	1.01993	0.999057
	1.31284	1	0.989515	1.01808	0.998682	0.979721	0.965261	0.976716	1.00821	0.987557	0.990654	0.993969	1.00639	1.01646	1	0.976139	1.00396	1.0045	1.00309	0.988764	0.988048	1.02326	1.00458	1.0114	0.995041	0.99589	0.971816	0.980685	1.00777	0.963866	0.969913	0.978166	1.00226	1.01	1.00373	0.996825	0.981701	0.996696	1.0061	0.999126	1.00235	1.01836	1.03296	1.01275	0.99915	0.998262	1.025	1.01842	1.00907
	1.31273	0.997807	0.986967	0.987654	1.00608	0.972586	0.989286	0.97482	0.970522	0.977124	0.994273	0.98467	1.02329	1.01321	1	0.974128	0.986598	0.982742	0.986985	1.00587	1.04244	1.01023	0.998483	0.9952	0.971564	0.984993	0.962325	0.981802	0.987879	0.978778	0.995114	0.981385	1.01489	1.00247	1.0037	1.0103	1.00434	1.01856	0.981225	1.0051	1.00622	1.01897	1.0102	0.99911	0.997492	1.00773	1.02663	1.01918	0.994737
	1.31263	0.984375	0.98109	1.01379	0.988069	0.989212	0.983607	0.994253	0.99774	1	1	0.98951	0.993812	1.0144	0.973778	0.980066	0.985386	1.01022	1.02014	0.982474	1.00105	0.980892	1.00302	0.993779	0.9808	0.993132	0.980132	1.00463	0.98579	0.983912	0.996803	1.00747	1.01685	0.985507	1.02273	1.00615	1.01281	0.982218	1.00784	1.00256	1.00301	1.01357	1.0178	1.01146	1.01331	1.00085	1.00929	1.01195	1.00086
	1.31252	0.996859	0.980285	0.992537	0.969728	0.951737	0.981169	0.972603	0.99137	0.993513	0.966814	0.995418	0.981481	1.01592	1.02699	0.99337	1.00209	0.992663	0.977968	0.995455	1.01605	1.00963	1.00936	0.990937	0.988691	0.987395	0.972036	0.978363	1.00849	0.978204	0.982085	0.978293	0.993119	1.00169	1.00458	0.995922	1.00213	0.997901	1.00678	1.00247	1.00985	1.01119	1.03004	1.00813	1	1.02575	1.0162	1.03351	1.01232
	1.31241	0.994995	0.97801	0.967579	0.978404	0.980479	0.977193	0.985728	0.969608	0.996891	0.983836	0.98983	0.998807	1.0013	1.0024	0.989189	1.01135	1.00508	0.972189	1.00115	0.998815	0.997097	0.985173	0.989181	0.986003	0.993197	0.986828	0.978182	0.995404	1.00831	0.988196	0.985086	1.00076	0.993238	0.991636	1.00307	1.00629	1.00104	1.00282	0.983173	1.00877	1.01163	1.00749	1.00705	1.00082	1.01005	0.992543	1.00947	1.00695
	1.31231	0.996047	0.992791	1	1	1.00087	0.990662	0.99146	0.981216	0.984834	1.01354	0.984716	1.00355	1.0025	0.996466	1.02039	0.986028	1.01742	0.985832	0.989865	0.98692	1.00906	1.01413	0.986842	0.973354	0.977242	0.97739	0.98374	0.979354	0.988909	0.987921	1.01032	1.00236	1.01049	0.997164	1.01869	0.990436	0.990625	1.00467	1.00972	1.00933	1.01777	1.0123	1.00944	0.983133	0.988353	1.00753	1.01357	1.00511
	1.3122	1	0.984032	0.986341	1.00812	0.983306	0.980535	0.97881	0.991108	0.99738	0.99418	0.995807	0.989773	1.00749	0.983871	0.983539	1.00196	1.002	0.994069	0.985683	1.01413	0.989537	1.01616	0.980322	0.983361	1.00137	0.989627	0.988587	0.984475	1	0.978051	1.00999	1.01941	1	1.00958	1.00216	1.01314	0.989529	0.992474	1.00318	1.00357	1.02822	1.02303	1.01459	0.992834	0.994229	0.990969	1.03752	1.02951
	1.31209	1.0047	0.98756	1.01054	0.977625	0.991667	0.986508	0.980484	0.969674	0.986454	0.983607	0.991493	0.990425	1	0.989808	0.992857	1.00671	0.985795	0.996524	1.00439	0.99654	1.00731	1.01201	0.96831	0.998261	0.976776	0.987302	0.978122	0.989427	0.986702	0.974293	0.994088	1	0.997309	1	1.02153	1.00326	1.00869	0.994214	1.00946	0.997203	1.01105	1.03097	1.01884	1.00965	1.0171	1.01379	1.00668	1.01607
	1.31199	0.986654	0.969319	0.996216	0.964164	0.981007	0.980284	0.993716	0.990902	1	1.00328	1.0072	1.00705	0.989095	1.01471	1.00103	1.0087	1.01406	1	0.986185	0.996567	1.00145	0.991554	0.958763	0.98917	1.00733	0.983982	0.997093	0.989228	0.992895	0.997418	0.977593	1.00349	1.01399	1.00711	1.00551	1.00769	0.992248	1.00915	1	1.02182	1.01611	1.03063	0.998301	1.00078	0.991857	1.00886	1.01653	1.00337
	1.31188	0.987001	1.00285	0.975904	0.987277	0.988755	0.996877	0.984091	0.981858	0.993558	1	0.994176	0.988214	1.00299	0.970317	0.975538	0.995349	1	0.990693	0.986974	0.984581	0.997203	1.01701	0.969072	1.01786	0.983776	0.984831	0.981151	1.0019	0.984028	0.989011	0.992101	0.982716	1.00191	0.990635	1.01839	1.00571	1.00693	0.983351	1.00251	1.01196	1.01286	1.00735	0.992405	1.00079	1.00898	1.01369	1.01298	0.990156
	1.31178	0.996265	0.977528	0.988879	0.993215	0.984089	0.976515	0.99699	0.987743	0.992455	0.989818	0.999208	1.00593	1.01184	0.988051	0.984821	0.97227	0.995622	1.00512	0.977273	0.998941	1.00681	1.00839	0.979275	0.986418	0.969609	0.977117	0.980905	1	0.989834	0.985482	0.986708	1.00888	1.02235	1.03168	1.00118	0.98692	0.978824	0.98668	1.00084	1.00607	1.00433	1.02809	1	1.0143	0.989608	1.01617	1.03466	1.01243
	1.31167	0.995327	0.970476	0.986239	0.993971	0.99212	0.990211	0.991864	1.00571	0.988178	0.989884	0.993893	1.00397	0.983816	0.994037	0.983227	1.00951	1.00335	0.998006	1.01029	1.0216	1.00931	1.01138	0.998302	0.944724	0.985775	0.984462	1.002	1.019	1.00391	0.97007	1.00557	1.00485	1.00089	1.00633	0.9953	1	1.00856	1.00745	0.984443	1.00544	1.0243	1.03109	1.00262	1.00158	1.00162	0.988477	1.02161	1.00502
	1.31156	0.986376	0.97486	0.989991	0.989787	0.974239	0.988654	1	0.998591	1.00546	1	0.983788	1.01474	0.990323	0.983696	0.988321	0.995162	1.01199	0.999086	0.994604	0.999005	1.03851	0.987673	0.977564	0.969206	0.983607	0.964781	0.989852	0.985701	0.994242	0.98916	0.991143	1.00559	1.00176	1.00409	1.00459	1.01683	1.00123	1.00987	1.01379	1.02215	1.01961	1.04462	1.02058	1.01174	1.00162	1.00801	1.01008	1.00251
	1.31146	0.975365	0.97417	0.980018	0.994941	0.984812	0.994741	0.989744	0.982639	1	0.995215	1.00654	0.991648	1.00482	0.979198	1	0.999332	0.997988	0.999148	0.992412	0.989423	1.01028	0.989394	0.978756	0.993661	0.963589	0.982292	0.989964	0.994318	0.982358	1.00541	0.986611	1.01506	0.999087	1.01151	1.00801	1.02696	0.996212	1.00789	0.985876	0.993459	0.994458	1.02973	1.01484	0.97961	1.00431	1.03442	1.02694	0.996694
	1.31135	1.01956	0.963523	0.979242	0.985025	0.981087	0.976173	0.992058	0.985014	0.986084	1.00068	1	1.00297	1.01205	1.00364	0.984997	1.00762	0.998709	0.999222	1.00681	0.992007	1.01472	0.985229	0.996979	0.970414	0.974937	0.976024	1.00837	1.01046	0.971229	0.977612	1.00486	1.01638	0.997159	1.01044	1.00342	1.00245	1.00865	0.986726	0.994214	0.988946	1.00166	1.02064	0.998987	0.996251	1	1.01482	1.0273	0.994118
	1.31124	0.987013	0.986559	1.00177	0.991013	0.960576	0.96679	0.995671	0.987663	0.97358	1.01222	0.984817	0.992738	0.988985	0.990566	0.989032	0.987109	1.0056	1.00075	0.974126	1.0008	0.982514	0.998588	0.994048	0.998538	0.967431	0.985577	0.977817	1.00543	0.968564	0.987529	0.981618	1.01076	1.01231	1.02775	1.0081	1.01673	0.997567	0.996644	0.984601	1.02892	1.02562	1.01675	1.00613	0.987203	1.00184	1.01805	1.04159	1.02208
	1.31114	1.00794	0.979021	0.980936	0.978998	0.98403	1.00448	0.976087	0.985201	0.989858	0.997292	0.99096	0.994792	1.00233	0.983345	0.990073	0.986378	1.00125	1.00844	0.987671	1.01776	1.01646	0.996119	0.974895	0.984035	0.983233	0.99907	1	0.99659	0.977704	0.986903	1.00218	0.997598	1.0119	1.01399	0.997608	0.979567	0.996319	1.00454	0.991288	0.995606	1.02566	1.01331	1.01072	0.984704	1.00875	1.00562	1.02751	1.01682
	1.31103	1	0.980786	0.983844	0.979544	0.977974	1.00216	0.995733	0.993882	0.988808	1.00135	0.986915	0.994148	0.99616	0.994366	0.994249	0.997008	0.996357	1.01123	0.995283	1.00957	1.01338	1.00956	0.987113	0.997249	1.0057	0.972783	0.984424	0.998419	0.985294	0.989568	0.981664	1.00831	0.984797	0.994106	1.02476	1.03453	0.992899	0.9967	0.995206	1.0199	1.01869	1.02834	1.00421	1.01069	1.01978	0.997172	1.04127	1.01335
	1.31092	1.00091	0.994485	0.996525	1	0.990434	0.995049	0.992313	0.989967	0.982213	1.0027	0.988153	1.00149	1.0095	0.997857	0.98852	0.990471	1.00302	0.994131	1.00136	1	1.03263	0.995455	0.977354	0.987326	0.957311	0.985088	0.981707	1.00233	0.973392	0.984914	1.00277	0.994092	1.01147	0.990884	0.997833	1.0061	0.992692	1.0068	1.01744	1.00515	1.00593	1.02603	0.992693	1.01178	0.996985	1.01159	1.02863	1.01081
	1.31082	1.00737	0.987896	0.978799	0.980221	0.999259	0.956974	0.985507	0.989269	0.996066	0.986056	0.994425	0.995575	0.988933	0.989369	0.988005	0.998792	0.985172	1.0044	1.00744	1.01913	1.03036	0.988889	0.991954	0.99763	0.973361	0.967374	0.989402	0.998458	0.991085	0.981645	1.00064	0.996491	1.01454	1.00541	0.998989	0.988713	0.994173	0.996703	1.00675	1.01401	1.01127	0.999015	1.00933	1.00586	1.00813	1.02282	1.02725	1.01204
	1.31071	0.973022	0.994377	0.981166	0.979708	0.984456	0.981106	0.991108	0.982917	0.992921	1.00326	1.00903	0.988397	1.00156	0.992126	0.975734	1.00424	1.00243	0.999276	1.00133	1.00498	0.998145	0.993457	0.981941	0.994376	0.985521	0.978412	0.974535	0.990518	0.999274	0.998029	0.994608	1.00066	0.99613	0.9938	1.02189	1.00726	1.00106	1.00315	0.999067	1.00427	1.01448	0.997082	1.01753	1.01452	0.983152	1.02365	1.03753	0.997982
	1.31061	0.982095	0.979648	0.963972	1	0.986582	0.979403	1.0055	0.986996	1.00261	0.998016	0.984962	0.993416	1.01986	1	0.98789	0.988499	0.98601	0.994245	1.00403	1.01675	1.04004	0.997788	0.997706	0.990868	0.980263	0.973939	0.99473	0.991842	0.988203	1.00399	1.00651	0.992665	1.01101	1.01135	1.00798	0.98913	1.00593	0.991115	0.987421	0.998324	1.01203	1.00196	1.03135	1.00284	1.00799	0.99803	1.02273	1.01773
	1.3105	1.01313	0.983081	0.984469	0.989975	0.979969	0.985106	0.975383	0.986399	0.98814	1.00261	1	1.00931	0.996965	0.98615	0.994937	0.994709	1.01279	1.00573	1.00662	1.00493	1.03247	1.01788	0.989842	0.996644	0.958106	0.9734	1.00063	1.0076	0.986425	0.988593	0.974434	0.998807	1.01032	1.01618	1.02231	1.02392	0.995274	0.993677	0.992742	1.00388	1.01728	1.01823	1.01022	0.990715	1.01961	1.00193	1.01809	1.00812
	1.31039	0.993049	0.958855	0.964971	0.999185	0.982294	0.980659	0.983848	0.992126	0.99185	1.01805	0.99143	0.993653	1	1.00761	0.977982	1.00294	1.00661	1.00359	0.994695	1.01577	1.00727	1.01739	0.983444	1.00789	0.974522	0.971591	0.988693	0.995644	0.976161	0.996355	1.00174	1.01886	0.998695	1.01877	0.983621	0.998119	1.01283	0.975966	0.994007	0.9993	1.00381	0.996307	1.02115	0.989786	1.01371	1.01461	1.01564	0.998008
	1.31029	0.997917	0.96771	0.994676	0.977419	0.971927	0.984275	0.973684	0.991126	0.982558	0.98886	0.975464	1.00211	1.00076	1.00687	0.984242	0.995979	1.00059	0.993612	0.992758	1.00641	1.01018	0.975815	0.98895	0.983389	0.967273	0.973315	0.98453	0.984691	0.9807	1.01036	0.987486	0.987854	1.00459	1.00443	1.01208	1.01503	1.0009	0.998319	0.999276	1.01124	1.02075	1.03823	1.01552	0.983725	1.00956	1.01536	1.0185	1.00098
	1.31018	0.983957	0.975	0.996132	0.985939	0.986239	0.982833	0.995004	0.978142	0.987582	0.993324	0.991144	1	1.00969	1.01722	0.992088	0.990904	1.00461	0.988316	0.998053	1.0071	1.02296	1.00758	0.9989	0.991238	0.972924	0.990826	0.998756	1.00185	0.981099	0.98948	0.997937	1.01063	1.01687	1.01318	1.01781	1.0043	1.00172	1.01229	1.00502	1.00773	1.0032	1.01247	1.01065	0.998247	0.994485	1.01908	1.01829	1.0097
	1.31007	0.991471	0.97306	0.977249	0.980699	0.999189	0.982558	0.994286	0.985547	1.0093	0.997908	1.00141	1.00512	0.999237	1.01166	0.987226	0.979143	0.99885	1.02227	0.989815	1.00069	1.00928	0.996674	0.992257	0.993385	0.965116	0.964059	0.993769	0.990619	0.996992	0.994347	1.00051	1	0.992044	1.0301	1.01695	1.00171	0.995871	0.986122	0.995286	1.00634	1.03232	1.02156	1.004	0.997539	1.00177	1.00555	1.00774	1.01468
	1.30997	0.993789	0.950802	1.00753	0.984834	0.974958	0.967767	0.988148	0.991741	0.97038	1.00344	0.991379	0.997766	1.00394	0.982841	0.993373	1.01003	1.0108	1.01645	0.996847	1	1.0163	0.989023	0.990066	0.987925	0.971971	0.974447	0.993823	1.00062	0.983929	0.973064	0.999492	1.00319	1.01193	1.01444	1.00811	0.994958	0.998373	0.993151	0.993473	1.01345	1.0122	1.01149	1.00597	0.986597	1.00567	1.00436	1.01058	1.00784
	1.30986	0.986721	0.982105	0.977964	0.99031	1.00182	1.0068	0.979876	0.99089	0.976175	1.00068	1.00918	1.00218	1.0057	0.992086	0.980827	0.994966	0.984261	1.00273	1.00063	1.02207	1.00976	0.994652	0.992391	1.00109	0.964158	0.967899	0.989051	0.975212	1.0006	0.990935	1.00052	1.01026	1.00954	1.01685	0.987997	0.998377	0.983037	1.00676	0.995575	1.01054	1.01749	1.02656	1.00796	0.995907	1.01321	1.01113	1.02737	1.00772
	1.30976	0.974535	1.00102	1.00515	0.973435	0.982727	0.972926	0.976955	0.975983	0.996678	0.986047	1.00482	0.991398	0.99679	0.989698	0.974582	0.998857	0.999432	1.00962	0.994371	0.99446	1.02342	1.01451	1.00217	0.989305	0.99819	0.972689	0.987132	1.01415	0.992299	0.984208	1.00312	1.00323	1.00954	1.02538	1.00149	1.01256	0.988942	1.00303	1.01073	0.994401	1.0254	1.01107	1.01336	0.997948	0.993746	1.01691	1.01944	0.982975
	1.30965	0.997204	0.988315	0.988131	0.999069	0.990351	0.997414	0.982993	0.983784	0.96756	0.995807	0.991848	0.995733	1.00078	0.987564	0.986443	0.991093	0.994718	0.981856	0.99938	1.00068	1.00088	1.00515	1.02015	0.981033	0.974606	0.972106	0.998802	1.00181	0.987625	0.978912	0.98895	1.00483	1.01071	1.00406	1.00519	1.00378	1.00616	0.995686	1.00558	0.997238	1.02627	1.01754	1.00867	1.01357	1.00275	0.99047	1.01292	1.00327
	1.30954	0.995459	0.995305	0.995117	0.981132	0.991431	0.972682	0.975773	0.987805	0.98993	0.986456	1.00074	0.99926	1.02492	0.989154	0.997277	0.998144	1.008	1.00504	1.00319	0.984116	1.01892	1.00208	0.996802	0.976042	0.98185	0.964746	0.98389	1.00665	0.987005	0.982016	0.973	1.00965	0.992225	1.00339	1.01522	0.999225	1.01237	1.0028	0.98006	1.00615	1.01834	1.02274	1.00947	1.0119	1.02334	0.987984	1.03752	0.993338
	1.30944	1.01246	0.978182	0.97619	0.99063	0.981117	0.983023	0.982526	0.988968	0.983542	0.98629	0.989617	1.00961	0.991235	0.978832	0.990585	1.00569	1.0019	0.988856	1.00199	1.01293	1.01745	1.01293	1	0.994692	0.95794	0.980641	0.979858	0.983635	1	0.996692	0.998504	0.995772	1.00671	1.01223	1.00076	0.996845	1.00309	0.988973	0.99297	1.00216	1.00765	1.0113	1.01858	0.993754	1.00066	1.01141	1.01801	1.00572
	1.30933	0.986633	0.990468	0.986934	0.977654	1.00632	0.976708	1	1.00226	0.976959	0.980143	0.994229	0.994078	0.991611	0.988823	0.984655	1.00186	0.988903	0.994007	0.997324	1.0059	1.02068	1.0163	0.981681	0.990506	0.970715	0.976729	0.999415	0.981966	0.977311	0.985546	0.994975	1.00855	1.02138	1.0135	1.00228	0.997678	1.00315	1.00494	1.00293	0.993089	1.03084	1.01424	1.02547	1.00786	1.01076	1.00764	1.0175	1.01124
	1.30923	0.978108	0.986356	0.953771	0.989354	0.978261	0.97048	0.992614	0.994078	0.993243	0.986729	0.99179	0.993908	0.992793	0.988497	0.996811	0.995698	1.00971	1.00617	1.0056	1.01648	1.00579	1.00777	0.983389	0.976242	0.986014	0.976158	1.00118	0.990041	1.00572	0.995174	0.998035	1.00734	1.01243	1.00941	1.02011	0.996877	1.007	1.00287	0.989917	0.996766	1.02554	1.01115	1.01668	1.01552	0.998759	1.03308	1.01111	1.01351
	1.30912	0.996441	0.977122	1.00838	0.999294	0.996496	0.991501	0.994346	0.987787	0.989099	0.983283	1.00323	0.997436	1.01565	1.00638	0.990112	1.00616	1.01611	0.998462	0.99316	0.984733	1.02953	1.00234	0.988814	0.982143	0.973868	0.977027	0.99176	0.993548	1.00279	1.00263	0.996636	1.00308	0.999424	1.01664	1.01881	1.00077	1	0.982505	1.0006	1.01167	1.02016	1.01342	1.00959	0.994107	1.01856	1.01295	1.0232	1.00393
	1.30901	0.989145	0.992335	0.995043	0.987392	0.990391	0.978695	0.983662	0.997199	1.00069	0.994917	1.01012	0.992487	0.997243	0.995086	0.981455	0.997389	0.993598	1.01009	1.0082	1.02552	1.01793	1.01748	0.989399	0.998814	0.987226	0.960948	0.973652	0.988074	1.00574	0.997361	1.00478	1.01417	1.00918	1.01598	1.0171	1.00303	1.00835	0.997912	0.998803	1.00386	1.01156	1.02391	1.00445	1.00831	1.01215	1.01165	1.01823	0.993639
	1.30891	1.00399	0.969819	0.99396	0.994371	0.970267	0.971268	0.996755	0.983913	0.97322	1.00617	0.991163	1.00568	1.01415	0.993339	0.99776	0.995182	0.988443	0.991179	0.979763	1.014	1.01367	1	0.998747	0.997549	0.98482	0.969264	0.992303	0.997538	1.00117	0.989328	0.989247	1.01129	1.01812	1.01568	1.00222	1.00995	1.00607	0.986477	1.0006	0.998359	1.02314	1.02906	1.0129	0.996483	0.996944	1.00739	1.03167	0.999367
	1.3088	0.984677	0.970336	0.981735	0.979604	0.979757	0.981939	0.978979	0.994399	1.00189	1.00464	0.988219	0.993082	0.998302	1.00479	0.985326	1.01189	0.996466	0.983727	0.997076	1.00306	0.996024	1.01472	0.993523	0.976456	0.991124	0.974417	0.996078	0.991829	0.99195	0.989589	1.00095	1.00668	0.996614	1.02414	1.01213	1.0128	0.994043	1.01109	1.0111	0.997875	1.02045	1.03006	1.01161	1.00059	1.00989	1.0175	1.02107	1.00689
	1.3087	0.982609	0.986459	0.981924	0.988568	0.976611	0.989137	0.988941	0.983938	0.998172	0.99673	0.992372	0.973154	1.00417	0.979102	0.99419	1.01809	1.01924	1.01025	1.01325	0.98539	0.986139	0.9843	0.97561	0.975919	0.983454	0.981833	0.996571	0.996829	0.98481	0.976663	1.01459	0.997375	0.980737	1.00254	1.00807	1.00597	1.00366	0.991875	1.00646	1.02161	1.00921	1.03648	1.00903	1.00597	0.993823	1.02488	1.00309	1.00374
	1.30859	1.00331	0.979361	0.976175	0.997004	0.997125	0.97746	0.973018	0.9819	0.990566	0.994901	0.98386	0.997763	0.998351	1.00151	0.982069	1.00743	1.01307	0.997504	0.989305	0.994103	1.02796	0.987835	0.981297	0.971069	0.969506	0.97547	0.993103	0.994036	0.990183	0.989209	0.996915	1.01051	1.00468	1.03023	1.03169	1.01366	0.999267	0.995296	0.998859	0.995246	1.01866	1.01403	1.02726	0.999397	1.0082	1.01856	1.02406	1.00191
	1.30848	0.998072	0.986711	0.986504	0.986928	0.978127	0.976433	0.985294	0.989867	0.998339	1.00305	1.0129	0.997135	1.01358	0.987134	0.9967	1.00379	1.00518	1.01354	1.00893	1.01951	1.01429	1.01403	1.01394	0.99877	0.991614	0.989048	1.00073	0.989532	0.987214	0.994888	1.01421	1.01187	1.0159	1.00856	1.00297	1	1.00456	0.993984	1.00569	1.02068	1.02286	1.00725	1.01659	1.00481	1.00868	1.00742	1.0136	0.998758
	1.30838	0.985933	0.983161	0.976553	1.00059	0.986592	0.980978	0.980239	1.00258	0.987799	1.00403	0.987485	1.00066	0.99697	0.989754	0.993679	0.987234	0.999374	0.993077	0.987069	1.0056	1.00213	1.00127	0.974293	0.967822	0.9727	0.964984	0.98357	0.999264	1.00071	0.983628	1.01341	1.00172	1.00946	1.01253	1.01852	1.00157	0.995437	0.994595	1	1.01251	1.00797	1.02649	1.00444	0.992398	1.00798	1.01777	1.02815	1.0152
	1.30827	0.992213	0.978361	0.982846	0.994226	0.990613	0.984383	0.989594	0.987026	0.987599	1.00053	0.986637	0.993839	1.00781	0.987734	0.989183	0.992455	0.989355	1.00665	1.00903	1	1.01217	0.996287	0.997452	0.973848	0.987755	0.976763	0.988987	1.00964	0.985925	0.988764	1.00459	0.999411	0.997424	1.01304	1.02762	1.00725	1.00614	0.998646	1.0069	1.0082	1.0337	1.03047	1.00498	1.01112	1.00424	1.00914	1.0037	0.995056
	1.30817	1.00722	0.97816	0.991688	0.98498	0.997231	0.980246	0.983971	0.994908	1.0049	0.990886	0.987766	0.980747	0.991973	0.98582	0.97937	0.996665	1.00232	0.994346	0.988552	1.00744	1.0079	0.998812	0.987562	1.0051	0.960847	0.97543	0.989209	0.986311	0.984507	0.99933	0.995892	1.00857	1.02754	1.0203	1.01477	1.00911	0.99839	0.971188	1.00176	1.02332	1.02733	1.00289	1.0169	1.01101	1.01396	1.02808	1.00989	1.0183
	1.30806	0.992935	0.974593	0.994216	0.991339	0.995607	0.983149	0.994408	0.98618	0.988253	0.998992	0.985348	1.00112	0.996917	0.98458	0.989829	0.984211	1.00839	0.997965	0.984107	1.00713	1.03195	0.998853	1.00962	1.00121	0.978261	0.994992	0.996464	1.00778	0.997915	0.994008	1.02169	0.998739	1.0021	1.03357	0.992525	1.01807	1.01448	1.01667	0.998782	1.01045	1.02086	1.01672	1.00122	1.00636	0.99403	1.02074	1.02864	0.999368
	1.30796	1.00258	0.992773	0.990397	0.992402	0.993926	0.978489	0.979808	0.984841	0.985701	1.00804	0.994353	1.00275	1.00893	1.0126	0.99647	0.998507	1.00157	1.01535	1.00659	1.0081	1.02102	1.00972	1.00115	0.98307	0.990177	0.978049	1.00145	0.991483	0.972509	0.986755	0.983432	1.0052	1.01938	1.00715	1.02078	1.00956	0.997416	0.989922	0.99566	1.01608	1.01879	1.02916	1.01842	0.994398	1.00534	1.01391	1.01535	1.00796
	1.30785	1.00129	1.00134	0.995434	0.997036	0.994901	0.981512	0.994342	0.990631	0.9946	1	0.989632	0.987376	0.99073	0.998942	1.00195	0.995292	0.997016	1.00903	1.00974	1.00389	1.02805	1.01366	0.996743	0.981701	0.978424	0.990734	0.990196	0.979885	1.01428	0.996719	0.980918	1.00132	1.01107	0.999178	0.997302	0.995532	0.98939	1.00884	0.998715	1.01657	1.02575	1.00916	1.02295	0.998866	1.00355	1.01727	1.04107	1.00743
	1.30774	0.996226	0.993494	0.986102	0.979745	0.980684	0.979559	0.9826	0.97929	0.994299	1.00443	1.00716	1.00272	0.99366	0.982804	0.987294	0.986099	0.992534	0.99194	0.995636	1.00994	1.02678	0.996055	0.992886	0.994764	0.99729	0.980797	0.994809	0.980887	0.996513	0.969954	0.988187	1.00129	1	1.01821	0.98832	0.99632	1.02587	1.00477	1.00401	1.01201	1.01474	1.02854	1.00798	1.00624	1.00289	1.01634	1.02142	1.00062
	1.30764	1.00955	0.981627	0.998728	1.00413	0.985971	0.978284	0.992147	0.985464	1.00049	1.002	1.00051	0.997812	1.00058	0.991961	0.980132	1.00943	1.01732	1.01314	0.992529	1.00177	1.01474	0.994197	0.991054	0.984568	0.998247	0.991696	0.994455	0.992208	0.977941	0.997332	1.00547	1.00328	1.01167	0.990107	1.00836	0.991412	0.982472	1.01256	0.995798	1.01021	1.00455	1.00826	1.01161	0.99886	0.998819	1.02197	1.02328	1.02625
	1.30753	1.01426	0.971268	0.979115	0.988034	0.989691	0.974506	0.989643	0.988563	0.990319	0.989087	1.00203	0.995154	0.994315	0.983272	0.996263	0.994702	1.00676	1.00769	1.00051	1.0028	1.01617	1.01497	0.999063	0.998054	0.997487	0.971613	0.992308	0.984802	0.98452	1.00312	1.00823	1.0078	1.00499	1.00891	1.02581	1.01781	0.999073	0.98362	0.993146	1.02037	1.00519	1.01169	0.991672	1.00994	1.0024	1.01792	1.00359	1.01389
	1.30743	0.993349	0.982467	0.986285	0.988327	0.991485	0.997905	0.991005	0.983487	0.984514	0.979065	1.00973	1.00707	0.995488	0.997937	0.980681	0.995671	1.00497	0.998382	0.999501	1.01734	1.0116	0.996546	1.01098	0.972371	1	0.977146	0.98755	0.989523	0.979452	0.990286	0.998897	1.00811	1.012	1.01208	1.01065	1.01659	1.00643	1	1.00069	1.01198	1.01862	1.02177	1.00585	1.00587	1.0114	1.00994	1.01296	1.00416
	1.30732	0.994431	0.978856	0.995752	0.977411	0.995778	0.975232	0.990104	0.990333	0.996135	1.01606	1.00052	1.00111	0.995989	0.99641	1.00186	0.994787	0.996413	0.989719	1.00697	1.00497	1.01708	0.990606	0.996463	0.981974	0.983847	0.970885	0.986249	0.990986	0.987527	0.984817	1.00937	0.99655	1.00696	1.00737	1.01343	0.99459	1.01268	1.00921	0.985406	1.01122	1.01908	1.0135	1.00132	1.02337	0.9943	1.00546	1.03771	1.01222
	1.30722	0.987402	0.990712	0.993317	0.972588	0.99735	0.996416	0.992225	0.991928	0.978634	0.989357	0.988718	1.00109	0.995362	0.980061	0.997211	0.991045	1.00888	0.995117	1	1.00991	1.00709	1.00336	0.985507	0.992347	0.984184	0.987342	0.986309	1.00645	1.0026	0.983887	0.993243	1.00914	0.997454	1.00701	1	0.998172	0.996429	0.996686	0.992356	1.01669	1.0088	1.03291	1.00273	0.993073	1.01212	1.00917	1.02536	1.00252
	1.30711	0.984976	0.996904	1.00431	0.983662	0.988064	0.984925	0.989382	0.991958	0.989744	0.991748	0.993444	0.983324	1.00695	0.987047	0.988046	0.998309	1.00044	1.0043	0.986248	0.991342	1	1.01245	0.989848	0.994191	0.974306	0.994966	0.995427	0.983068	0.990355	0.994071	1.01529	1.00406	1.01189	1.00218	1.00515	1.0092	0.999103	1.00166	0.993548	1.02231	1.01423	1.01518	1.01125	0.996146	1.00277	1.01821	1.03154	1.0097
	1.307	0.989558	0.990741	0.97419	0.982515	0.983087	0.975673	0.982169	0.990883	0.994828	1.00146	1.0056	0.977322	1.00115	0.990645	0.994329	1.00439	0.997321	1.01358	1.00845	1.01255	0.993626	0.996644	1	0.98418	0.986159	0.973628	0.980497	1.00507	0.993571	0.995702	0.99777	1.0227	1.00405	1.01683	1.018	1.00271	1.01279	1.02122	0.994993	0.995398	1.01139	1.00147	1.00888	1.01027	1.00072	1.03375	1.01915	0.994624
	1.3069	0.991189	0.980308	0.972222	0.993285	0.993827	0.975959	0.994552	0.992874	1.00655	0.992782	1.00448	0.984632	1.00115	0.995874	1.00374	0.994333	0.994168	1.01955	1	1.0092	1.01643	1.00856	0.981293	0.963744	0.975559	0.979493	1.00335	0.998556	0.989469	0.986499	1.00814	1.00292	1.00224	1.00997	0.996923	1.00857	1.01506	0.995868	0.998595	1.01239	1.02004	1.04475	1.01227	0.992938	1.02379	1.02784	1.02175	1.02073
	1.30679	1.00266	0.970849	0.982541	0.982496	0.993664	0.966067	0.986993	0.983181	0.992948	0.99322	1.00199	0.984475	1.00459	0.986025	0.99262	1	1.00676	1.00443	1.002	1.01032	1.00563	1.0102	0.990525	0.983564	0.96648	0.982271	0.997099	1.00333	0.991521	0.988041	0.9937	1.01011	1.00992	1.01673	1.00743	1.00162	0.990841	1.02473	1.0072	1.01126	1.00668	1.01437	0.998445	1.01033	1.00835	0.996266	1.03267	1.00418
	1.30669	1	0.977379	0.986233	0.992563	0.969425	0.980173	0.980129	0.987703	0.991354	0.977317	0.988107	0.997291	0.999435	0.996429	0.992266	1.00087	1.0009	1.00379	1.00551	1.00275	1.01126	1.00508	1.00885	1.0061	0.980198	0.974972	0.993181	1.00048	0.982044	0.982479	1.00868	1.02528	1.00105	1.01774	1.00141	0.995485	1.00769	0.978629	0.991078	1.00779	1.01936	1.0306	1.00312	1.00444	1.00616	1.02141	1.02061	1.01422
	1.30658	0.98929	0.983914	0.990316	1.00246	0.988398	0.971429	0.987531	1.00498	0.99562	0.995037	0.997006	1.0043	1.00674	0.984359	0.998191	0.990702	0.995115	1.00706	0.989635	1.00165	1.00701	1.0042	0.992379	1.0017	0.97454	0.981707	0.991695	1	1.00508	0.990761	0.98719	1.00936	1.0056	0.997688	1.00266	0.992857	0.998554	0.986906	0.987237	1.01514	1.02196	1.00677	1.00776	1.02557	1.00675	1.00228	1.02969	1
	1.30648	0.984796	0.985878	1.00199	0.989123	0.975754	0.967444	0.993219	1.00393	0.99756	0.995268	1.00104	1.00111	0.997669	0.987718	1.00089	0.984746	0.99651	0.995213	1.00843	1.00878	1.00924	1.00252	0.989735	0.974769	0.98443	0.99944	0.987141	1.00097	1.00375	0.980786	1.0035	1.00655	1.01023	1.01027	1.02996	0.981856	1.00138	0.985113	1.00487	1.01855	1.0223	1.02359	1.00156	0.99855	1.02857	1.01699	1.03557	1.01114
	1.30637	0.999292	0.97941	0.977361	0.987053	0.977206	0.979722	0.997856	0.99497	0.991592	1.00371	0.978051	1.00564	0.989324	0.990456	1.00046	0.999575	0.995688	1.01285	0.995081	1.01481	1	1.00083	0.994068	0.999163	0.991495	1.00167	1.00942	0.997082	0.986417	0.989837	0.993738	1.0051	0.996234	1.00889	0.999365	1.00541	1.00467	0.993816	1.00692	0.99723	1.02328	1.00291	1.00377	1.01752	0.996983	1.01917	1.01087	1.01572
	1.30627	0.993888	0.973626	0.991356	0.978873	0.998209	0.996372	0.989755	0.995283	1.00458	0.99839	0.986501	0.992554	1.00674	0.992333	0.992785	0.999114	1.00625	1.00431	0.993197	1.02296	0.987552	0.998328	1.00433	0.9734	0.984551	0.988877	0.995586	0.997549	0.987845	0.989773	1.00161	1.0026	0.993399	1.01916	0.992029	1.00521	1.00763	0.995146	1.01579	1.01851	1.03422	1.01308	1.00801	1.02094	1.00836	1.02964	1.00928	0.99146
	1.30616	0.985542	0.975781	0.974825	1	0.982008	0.970885	0.991908	1.00536	0.985021	1.00493	0.990741	0.991846	0.988322	0.99776	0.985956	1.00774	1.0101	1.00758	0.981216	1.00435	1.02042	1.00248	1.01027	0.98472	0.994409	0.996663	0.980097	0.985784	0.999056	0.981522	0.99158	1.00311	1.01269	1.006	1.02267	1.00774	0.998095	0.993389	0.995271	1.00728	1.03366	1.03444	1.02486	1.01839	1.00513	1.00978	1.03523	1.0102
	1.30606	1.00161	0.993543	0.996997	0.98345	0.989336	0.985128	0.988597	1.00672	0.989218	1.00332	1.008	1.00366	0.987662	0.993374	0.987462	1	0.993027	1.01299	0.99603	1.00504	1.00211	1.00162	0.989941	0.998339	0.993084	0.983097	0.99853	0.982626	0.995761	0.991209	1.00201	1.01266	1.01229	1.01265	1.00906	1.00315	1.01359	0.989163	0.998455	1.01643	1.01722	1.02459	1.01226	1.00372	1.0055	1.00506	1.025	1.01908
	1.30595	0.999196	0.980279	0.978227	0.972992	1.00065	0.982099	0.994079	0.984778	1.00115	0.992987	0.997568	0.993622	0.990826	1.00172	1.00155	0.996141	1.01989	1.00527	0.991614	1.01307	1.02709	1.00909	1.01266	0.97853	0.966285	0.982133	0.994138	1.00295	0.994779	1.00045	1.01225	0.997295	1.01554	1.01021	1.01317	1.00126	1.00252	0.997596	1.00568	1.00628	1.00929	1.01192	1.01419	1.01119	1.00706	1.00272	1.01644	1.00937
	1.30584	0.990476	0.980159	0.984472	0.992052	0.974751	0.983439	0.970249	0.995899	1.00751	1.00119	0.99151	1.00719	0.996628	0.990594	0.999484	0.996671	0.992471	0.9941	1.0011	0.996379	1.01842	0.991653	0.989238	0.997543	0.99109	0.964668	0.990935	0.990935	0.993882	0.997795	0.995986	1.00798	0.997544	1.02236	1.00185	1.01093	0.989362	0.981956	1.00763	1.00845	1.01184	1.03499	1.02522	0.987903	0.988002	1.01327	1.01629	1.00226
	1.30574	0.99684	0.98629	0.992869	0.98557	1.00625	0.99002	1.00064	0.993533	1.00508	1	1.00183	1.00589	1.01108	0.979344	0.981761	0.985602	1.02113	0.999407	0.993344	1.01549	1.00383	1.00518	1.00604	0.984975	0.982924	0.970449	1.0024	0.996187	0.989091	0.992924	1.01037	1.0097	1.0213	1.00725	0.993185	1.00892	1.01115	0.987129	0.999514	1.00313	1.02003	1.03003	1.01373	0.99774	1.01605	1.01058	1.02052	0.988621
	1.30563	0.988985	0.988728	0.973975	0.984892	0.996533	0.993894	1	1.00243	0.980713	1.00975	0.985375	0.992152	0.993094	0.974518	0.995609	0.993795	1.00934	1.00248	1.00675	0.986981	1.02466	1.01043	0.986413	0.982788	0.972936	0.979592	0.990094	0.986891	0.97635	1.00305	0.998011	1.01333	1.01924	1.00889	1.00502	1.00259	0.998748	1.00689	1.00287	1.03104	1.01333	1.00648	1.00515	1.00385	0.999426	1.01018	1.01188	0.994336
	1.30553	0.988532	0.975416	0.986614	0.97952	0.993831	0.972093	0.99551	0.985267	0.983784	0.990111	0.996931	1.01308	1.0155	0.993594	0.987049	1.00973	1.00202	1.01355	0.985714	0.996944	1.00777	1.03156	0.983992	0.987589	0.996525	1	0.990584	1.00332	0.997315	1.00341	0.990403	1.01041	0.993692	1.0112	1.00982	1.01089	0.993025	1	1.00048	1.01295	1.02469	1.03234	1.02664	1.00316	1.01319	1.01538	1.0267	1.02046
	1.30542	0.994753	1.00079	0.987768	0.986591	1.00549	0.968977	0.984066	0.992491	1.00061	0.996875	0.984267	0.999336	1.00856	0.982097	1.00525	1.00328	0.997844	0.992042	1.00341	1.02226	1.03577	0.983501	0.987607	0.992667	0.994917	0.979855	1.00387	0.997148	0.967494	0.992201	1.00469	1.00477	1.00434	1.01985	1.01442	0.989657	1.00128	0.99007	1.00201	0.991495	1.02692	1.02104	1.0157	1.00154	1.00979	1.03273	1.01767	1.00942
	1.30532	0.995021	0.985141	0.99353	0.987057	0.990099	0.983182	0.999371	1.00185	0.98285	1.00619	0.989697	1.00478	1.00363	0.981302	0.994176	0.99616	1.00111	1.01905	0.985574	0.992505	1.0182	0.986162	0.996187	0.991674	0.989521	0.99242	0.987058	0.999046	0.980162	0.995639	0.999608	1.01173	1	1.00337	1.01119	1.00517	1.01475	1.00175	1.0005	1.01196	1.01838	1.03669	1.02658	0.993045	1.01154	1.00531	1.01579	1.02008
	1.30521	0.982155	0.98017	0.972612	0.988564	1	0.990031	0.975713	0.97116	1.00876	0.999384	0.989089	1.00349	0.990392	0.986211	0.993201	1	0.989944	0.995981	1.00421	1.02929	0.998363	1.00379	1.01446	0.979265	0.983594	0.995828	0.976781	1.01043	1.00568	0.97084	1.00078	0.989637	1.00426	1.00708	1.01405	1.00707	1.00956	0.998834	0.994546	1.01523	1.01535	1.00785	1.00847	1.0005	0.993302	1.01753	1.01471	1.00334
	1.30511	0.976998	0.987702	0.997421	0.995773	0.994656	0.988228	0.981341	0.990105	0.993135	0.995068	0.999362	0.996559	1.0188	0.99066	0.987599	0.995738	1.01299	0.997963	0.981051	1.02692	1.01747	1.00593	0.995136	0.99903	0.974563	0.976529	0.996736	0.992919	1.00202	0.990591	0.992897	1.00739	1.01582	1.00719	1.00992	0.997404	1.00258	0.987194	0.997034	1.01597	1.02473	1.01782	0.986645	0.997494	1.00052	1.00567	1.01704	0.996743
	1.305	0.988701	0.991463	0.976548	0.985836	0.972633	0.979524	0.961067	0.989702	0.988796	1.00304	0.993711	1.01207	1.00217	0.996664	0.992353	1.00108	0.998344	0.989086	1.01072	1.01413	0.995556	0.998981	1.001	1.00097	0.985222	0.967224	0.992235	1.00334	0.985546	1.00096	1.00123	1.01472	0.995599	1.00222	1.00993	0.993659	1.00646	1.01485	1.00401	1.01358	1.02127	1.01856	1.01264	1.01233	1.00531	1.00471	1.03562	1.01429
	1.3049	0.996169	0.99421	0.985963	0.982979	0.981538	0.969509	0.991786	0.978511	1.00946	1.00526	1.00373	0.998666	1.01305	1.01134	0.9988	0.983489	1.00114	1.00138	0.987358	1.01607	1.01077	0.974568	1.00299	0.981244	0.982544	0.988135	0.997729	1.01284	0.996118	1.0085	0.998313	1.00508	0.999024	0.997779	1.02211	1.00762	0.997505	1.00463	1.01215	1.01969	1.01027	1.02943	1.01942	1.00261	1.00481	1.01869	1.02796	1.00163
	1.30479	1.00589	0.991625	0.983801	0.983392	0.989448	0.980948	0.996558	0.980769	0.993114	0.997254	0.998177	0.997292	0.995736	0.989137	0.987798	1.00504	0.994807	1.00774	0.987453	1.01733	1.00538	0.996907	0.98392	0.989433	0.988487	0.985469	0.976998	1.00409	0.986325	0.984224	0.996912	1.01182	1.00406	1.00798	0.993301	1.00127	1.00438	0.997156	1.00295	1.0116	1.01363	1.02149	1.02879	1.00261	1.00271	1.02481	1.01544	1.00543
	1.30469	0.993757	0.982786	0.989936	0.988417	0.979099	0.985253	0.959339	0.992108	0.982726	1.00615	1.00634	0.997424	1.00756	0.986957	0.994413	1	1.00057	1.0007	0.989375	1.0076	0.994629	0.997897	1.0031	0.986922	0.981054	0.977506	0.983198	0.995269	0.997738	0.989707	0.98725	1.01067	1.00963	1.00512	1.01413	1.0069	0.992647	0.991587	0.999517	1.00949	1.01826	1.03344	0.997841	0.9959	1.00635	1.01227	1.01887	1.01191
	1.30458	1	0.979905	0.979466	0.986361	0.986922	0.966546	0.990675	0.986559	0.983448	0.980835	1.01087	0.998761	0.981071	1.00542	0.992445	0.996308	1.00388	0.997292	1.00845	1.00276	1.00456	0.983264	0.997919	0.985477	0.986968	0.984738	0.982415	0.988532	0.98441	0.978203	0.995234	1.01001	0.996716	1.00354	1.00824	1.0038	1.00621	0.992554	1.01622	1.00357	1.0226	0.997879	1.01775	1.00669	1.00489	1.03133	1.04171	1.00166
	1.30448	0.999487	0.981442	0.981122	0.989032	0.973327	0.986124	0.997431	0.995789	0.988261	0.991412	1.00315	1.01358	0.991946	0.982623	0.983342	0.997386	1.00216	0.992792	0.982412	1.00501	1.02703	1.00214	1.00632	0.991761	0.974672	0.986357	0.997024	0.988486	0.977663	0.98174	1.00921	0.980434	1.01559	1.01523	1.02274	1.00582	0.994997	0.990128	1.005	1.01972	1.0176	1.02767	1.00216	1.01242	1.00321	1.02087	1.02564	0.996143
	1.30437	0.981016	0.96651	0.981084	0.97824	0.986061	0.97358	0.985362	0.986864	0.990856	1.01519	1.01669	1.00171	0.992271	0.994092	0.997973	0.991824	1.0016	1.00793	1.00495	1.02054	1.02281	1	0.981557	0.978373	0.985009	0.96547	1	0.998217	0.987784	0.974608	0.984526	1.01561	0.998859	1.01927	1.00337	1.01037	0.997387	0.999408	1.00551	1.01189	1.01534	1.0229	1.01495	1.00252	1.00953	1.01319	1.02053	1.01263
	1.30427	0.990596	0.977091	0.984592	0.974263	1.00045	0.97064	0.978759	0.995483	1.00124	1.00801	0.99952	1.00321	0.985722	0.991662	1.00049	0.993167	0.993688	0.982387	0.999382	1.0125	1.01147	0.988323	0.992577	1.00104	0.98241	0.98662	0.999375	1.00751	0.991682	0.980317	0.999021	1.00972	1.00702	1	1.00074	0.997033	1.00425	0.993305	0.995902	1.02516	1.03022	1.02295	1.0122	1.00051	0.993048	1.02417	1.02608	0.995595
	1.30416	0.98917	0.975341	0.987817	0.985123	0.983943	0.991619	0.987972	0.985708	0.999188	0.997869	0.995995	1.00101	0.998902	0.997445	1.01004	0.992971	0.993384	0.991173	0.985233	1.00067	1.01308	0.996875	1.01306	0.992616	0.974892	0.992324	0.987029	0.997508	0.977541	0.979467	1.00771	0.995774	1.0112	1.0187	1.00701	0.996154	1.02234	0.979747	1.00314	1.02155	1.02602	1.03459	0.98643	0.997985	0.982848	1.01171	1.02784	1.00276
	1.30406	0.991706	0.998403	0.991841	0.989603	0.990493	0.981157	0.98065	0.984211	0.994398	1.00342	1.00134	1.00197	1.00478	0.974665	0.998155	1.00091	1.00589	1.01161	1.00696	1.00719	0.993109	0.99692	0.99789	0.975532	0.969271	0.991453	0.994953	0.996849	0.9843	0.9983	0.999009	1.02326	1	1.01927	1.00694	1.02721	0.999236	0.99734	1.01965	1.0074	1.01429	1.02024	1.01439	1.00201	1.01573	0.99896	1.01401	1.00891
	1.30395	0.99174	0.976203	1.00358	0.986755	0.986541	0.98635	0.980913	1.00657	0.989281	0.984356	0.980017	0.999033	0.997944	0.996189	0.985249	0.996985	1.00273	0.997746	1.00111	1.0097	0.986452	1.0216	0.998971	0.988671	0.995567	0.974071	0.995586	0.992491	0.998186	0.994886	0.9913	1.01494	1	0.998654	1.01137	1.00081	1	1.01661	1.00878	1.00263	1.01232	1.03146	1.00267	0.997006	0.997377	1.01727	1.01102	1.00609
	1.30385	0.994318	0.968734	0.991919	0.995798	0.985228	0.981272	0.984413	0.996792	0.996046	0.995453	0.991839	0.989187	0.986726	0.9848	0.988411	0.995173	0.99915	0.998947	0.984496	1.00309	1.02956	1.00599	1.00295	0.988293	0.990598	0.97955	0.9969	0.995046	0.988152	1.00057	1.00682	1.02278	1.0122	1.02155	1.0059	1.02655	0.992366	1.01194	1.00661	1.01224	1.0157	1.01984	1.02136	1.00609	1.01392	1.01109	1.03263	1.00162
	1.30374	0.990196	0.979354	0.990261	0.984529	0.991039	0.990205	0.980611	1.00778	0.989976	1.00083	0.998724	0.993461	0.990718	0.991888	0.989592	0.999614	0.992635	1	0.995575	0.990741	1.00322	0.989443	0.998073	0.970106	1.00661	0.993494	0.984579	1.01293	0.980357	0.993107	0.994837	0.997057	0.993703	0.985656	1.02219	1.01189	1.03011	1.0058	1.00126	1.01708	1.02506	1.01903	1.01353	1.01618	1.01423	1.01489	1.00869	0.992481
	1.30364	0.991723	0.99153	0.981435	0.985812	0.987077	0.97744	0.994215	0.998781	1.00723	0.983471	0.99201	1.00374	0.995599	0.985983	0.978707	0.997033	1.01116	1.00455	0.999053	1.02319	1.01126	1.01073	0.997243	1.00646	0.960031	0.98429	0.987675	1.00059	0.978588	0.998854	0.993918	1.00762	0.993663	1.02498	1.03064	0.998453	0.99689	1.00953	1.00062	1.0135	1.02473	1.02361	1.00999	1.01023	1.00542	1.0032	1.02048	1.00322
	1.30353	0.992216	0.98836	0.994416	0.99581	0.982238	0.97487	0.98368	0.998796	0.998375	0.993779	0.997473	0.994954	0.987858	0.985545	0.998819	0.996669	1.00276	1.02044	0.9931	1.01442	1	1.01015	0.999124	0.995471	0.984187	0.997052	0.987811	1	0.979306	1.00114	1.00206	1.01586	1.03238	1.0155	1.02063	1.01617	0.997654	1.00881	0.998155	1.00813	1.02031	1.0093	1.01137	0.989058	1.00685	1.00749	1.03212	1.01356
	1.30343	1.00315	0.984169	0.975302	0.981733	0.997288	0.972246	0.984362	0.993488	0.993232	1.00703	1.00596	1.0051	0.986719	0.992204	0.992996	0.993706	1.00156	0.996622	1	1.02385	1.00693	1.00653	0.989482	1.00512	0.982001	0.99061	0.995283	0.992437	0.976681	0.98234	0.999487	1.00582	1.00706	0.991888	1.02862	1.01336	1.02339	1	0.991358	1.00691	1.02805	1.01935	1.01847	1.00263	1.00976	1.01605	1.0158	1.00773
	1.30332	0.98954	0.996279	0.990659	0.980337	0.989333	0.996004	0.986826	0.990024	0.98908	0.991922	0.987717	0.992227	1.00099	0.997406	0.99113	0.99742	1.00385	1.01188	1.0071	1.01139	1.00597	1.01112	0.984375	0.986465	0.984807	0.987407	0.985915	0.98202	1.00052	0.978568	1.00481	1.01072	1.00821	1.01105	1.02769	1.02284	1	1.00518	1.00125	1.02474	1.01646	1.01096	1.02436	1.00335	1.01226	1.00688	1.02151	1.02432
	1.30322	0.992192	0.992416	0.979381	0.988107	0.994543	0.972731	0.981871	0.991082	0.993257	1.01236	0.985238	1.01123	0.99269	0.997803	0.995713	0.995554	1.00734	1.00566	0.986481	1.00536	1.01018	1.00767	0.989189	0.9883	0.98364	0.99118	0.980173	0.996318	0.9826	0.995394	0.993714	1.01307	1.02032	1.02498	0.985565	1.00169	0.995054	0.999245	0.992318	1.01227	1.02521	1.02334	1.01649	0.998659	1.00201	1.01507	1.0133	1.01027
	1.30311	1.00103	0.985923	0.989827	0.994811	0.981465	0.990558	0.975248	0.984745	0.992445	0.998346	1.00127	0.983864	0.999512	0.992679	0.995367	0.989279	1.01733	0.998122	1.00695	1.00386	1.02228	1.00821	1.00684	0.986228	0.988008	0.9868	1.00581	0.982544	0.994658	0.988276	0.993908	1.01919	1.00485	1.0117	1.02002	1.01005	0.990954	1.0038	0.998717	1.01908	1.01437	1.01386	1.0091	0.982307	1.01924	1.00267	1.0188	1.02037
	1.30301	0.994805	0.976129	0.976406	0.984157	0.984636	0.9786	0.986881	1.00407	0.996855	0.997503	1.00509	0.999534	0.998559	1.01001	0.991889	1.00147	0.996513	1.00665	1.00173	1.02122	1.01115	1.00365	0.991215	0.980712	0.977578	0.982134	0.98915	0.986854	0.985151	0.988124	0.99777	1.00697	1.01445	1.01542	1.02008	1	1.00814	1	0.987188	1.02282	1.02114	1.02444	1.01531	1	0.987879	1.02195	1.02969	0.988537
	1.3029	0.975207	0.981501	0.987212	0.982201	0.995432	0.979157	0.990336	0.987238	0.983078	1.00418	0.999136	1.00707	0.990795	0.982502	0.989619	1.00037	0.998813	1.00874	1.00347	1.00191	1.0044	0.993492	1.01118	1.00593	0.969406	0.983034	0.997365	0.984545	0.99459	1.00227	0.97994	1.01537	1.00508	1.01396	1.02088	1.00167	1.02082	0.999235	0.985171	1.00241	1.0111	1.02054	1.02551	0.999346	1.01573	1.0076	0.985539	1.00072
	1.3028	0.984576	0.995179	0.986245	0.978495	1.00136	0.980018	0.980607	0.995907	0.976846	0.994491	1.00086	0.994865	0.999514	0.989773	0.998045	0.995956	0.998058	1.00339	0.998697	1.0174	1.02145	0.997801	0.995578	0.982609	0.985757	0.984998	1.00172	0.987698	0.984563	0.999577	0.989152	1.01059	1.01613	1.00512	1.01981	0.985692	0.993564	0.997739	1.0131	1.01634	1.0354	1.02491	1.01419	0.993456	1.00809	1.01865	1.0176	1.01017
	1.30269	0.994241	0.984697	0.985901	0.988879	0.994558	0.974945	0.980817	1.00494	0.979887	1.00296	0.991006	1.0028	0.996116	0.999116	0.992633	0.988157	1.02389	1.00239	1.00131	1.02016	0.993711	1.01946	1.00074	0.992017	0.974571	0.989312	0.997887	0.989669	0.994832	0.986122	1.00832	1.0092	1.01041	1.02129	0.997179	1.01402	1.00463	1.00074	0.996124	1.00778	1.02572	1.02313	0.99929	1.00134	1.00067	1.02259	1.0165	1.00636
	1.30259	0.996286	0.990385	0.981294	0.984	0.992841	0.979878	0.984767	0.987775	1.00243	0.986406	1.00087	1.00377	0.991146	0.989395	0.984801	1.0056	0.994886	1.00917	1	1.00297	1.00907	0.979058	1.00377	0.99422	0.981786	0.980769	0.986656	0.997909	0.986369	0.989332	0.992687	1.00651	1.01783	1.01156	1.01689	1.00758	0.996321	1.00494	1.00315	1.0126	1.00848	1.0335	1.01727	1.02351	0.994417	1.00136	1.01267	0.991667
	1.30248	0.98388	0.989429	0.986908	0.99812	0.985034	0.987687	0.975849	1.0004	0.981438	1.00331	0.996565	0.996265	1.00737	1	0.99097	1.00679	1.00865	1.00725	1.01368	0.993117	1.01404	0.999261	0.994043	0.987022	0.980369	0.991605	0.988769	0.995056	0.982079	0.977847	1.0018	1.00209	1.00719	1.02652	1.01432	1.00223	1.00511	0.996021	0.996346	1.00823	1.03163	1.02639	1.02443	1.01425	1.01402	1.03215	1.01892	0.978142
	1.30238	0.992408	0.976216	1.00309	0.972935	0.995419	0.979249	0.985886	0.995155	1.00641	1.00084	1.00346	0.997633	0.993069	0.984729	0.998804	1.00302	0.989007	1.00971	0.982616	0.995588	1.02601	1	0.989529	0.998519	0.964539	0.982276	0.995372	1.00591	0.988533	0.996924	1.0063	1.01648	1.01514	1.02995	1.02661	1.02106	0.998582	1.00907	1.00703	1.00906	1.03392	1.01879	1.02273	0.996633	1.01319	1.01327	1.02575	1.01832
	1.30228	0.999454	0.985654	0.972459	0.978322	0.990562	0.985379	0.973523	0.997132	0.993304	0.997938	0.99076	0.995875	1.0054	0.986374	0.982436	1	0.998454	0.986171	1.00262	1.00882	1.00507	1.00297	0.999256	0.994883	0.988561	0.98546	0.985012	0.997094	0.98976	0.995797	1.00512	1.00593	1.0103	1.02298	1.00728	1.00068	1.00352	0.989335	1.005	1.0026	1.02309	1.01893	1.00697	1	1.00767	1.02648	1.02836	1.0029
	1.30217	0.988197	0.98377	0.995418	0.989454	0.989061	0.988074	0.980737	0.999173	1.01079	0.985603	1.0021	0.996357	1.0053	0.979112	0.994136	1.00113	1.00747	1.00633	1.00219	1.02793	1.01078	1.01179	0.999255	1.00294	0.983676	0.971335	0.999151	0.99916	1.00201	0.99381	1.00103	1.00157	1.00439	1.01755	1.02413	1.0104	1.00946	1.00964	1.01439	1.01807	1.03009	1.02635	1.00067	1.00464	1.0125	1.02483	1.01823	0.99278
	1.30207	0.999459	1	0.982314	0.970227	0.994478	0.977558	0.985556	0.983306	0.992329	0.99036	0.999149	1.00141	0.982767	0.988032	0.988605	0.99586	0.996813	0.992708	1.00089	1.00151	1.01565	1.00147	0.998496	0.989637	0.964307	0.973443	0.991349	1.00722	0.998391	1.00352	1.00247	1.00316	1.01352	1.0085	1.02781	1.02966	1.02306	1.01429	1	1.01796	1.02263	1.01341	1.00507	1.01773	1.00905	1.03436	0.997059	1.02819
	1.30196	0.991282	0.984631	0.991621	0.994447	0.989728	0.977857	0.988964	1.00487	0.997617	1.00083	0.998723	0.994485	0.989914	0.982059	0.987688	1.00437	1.00154	1.00903	0.987831	1.01081	1.01144	0.997057	1.01722	0.984229	0.996982	0.992921	1.00213	0.995773	0.994031	0.994299	0.995571	1.00821	1.01391	1.00757	1.00626	1.01104	1.00748	0.98483	0.990541	1.02695	1.01786	1.02784	1.02388	1.00541	1.01003	1.01981	1.03188	1.00357
	1.30186	0.988787	0.973953	0.98816	0.984855	0.994232	0.979185	0.984422	0.992958	0.992388	0.996207	0.998691	1.01297	1.00587	0.988972	0.99186	0.996389	1.00039	0.988208	1.00571	1.00343	1.00888	1.01496	0.993323	0.990545	0.986293	0.980483	0.986504	0.991915	0.994728	0.989243	1.00624	1.01732	1.02228	1.01989	1.00942	0.998239	1.01137	1.00409	0.998455	1.02059	1.02456	1.01945	1.00518	0.997178	1.01061	1.021	1.02003	1.00947
	1.30175	0.991786	0.993805	0.986758	0.996324	0.982917	0.98412	0.988641	0.988525	0.998381	0.99915	0.990983	1.00614	0.989696	0.987347	0.994129	0.987587	0.994971	0.994374	1.00218	1.01085	1.00384	1.01193	0.999263	0.993483	0.978861	0.99439	0.9895	0.988545	0.989767	0.990559	1.00744	1.01454	1.01254	1.00939	1	1.00456	1.01545	0.99503	0.988183	1.01186	1.00564	1.02015	1.0062	0.999448	1.00996	1.00962	1.0393	1.00781
	1.30165	0.984793	0.987308	0.987186	0.99405	0.989987	0.973765	0.990107	0.992665	1.01513	0.990472	0.998272	1	0.990005	0.992481	0.979199	0.998525	1.0031	0.998097	0.992278	1.01254	1.01124	1.01758	0.986966	0.977617	0.992754	0.978371	0.991162	0.99787	0.98658	0.993262	1.0025	1.01804	1.00595	1.01098	1.01552	0.99549	1.00055	0.996273	0.998102	1.00565	1.01255	1.0211	1.02062	1.00546	1.00613	1.00733	1.0175	1.00205
	1.30154	0.991914	0.976819	0.983155	0.994413	0.985205	0.973965	0.98366	0.992286	0.988603	1.00533	1.01036	1.00694	1.00371	0.986413	0.987276	1.00224	1.00078	1.00765	0.992285	1.00192	0.993214	1.01485	0.98524	0.987663	0.979677	0.976636	0.993655	0.991479	0.989091	0.992439	0.994703	1.00693	1.00261	1.02055	1.00977	1.0017	1.0139	0.999486	0.988187	1.02501	1.01893	1.02138	1.00052	1.02608	0.998342	1.01276	1.01808	1.00906
	1.30144	0.987932	0.997765	0.975923	0.984878	0.993378	0.982957	0.976247	0.985433	1.00124	0.998283	0.993383	0.992496	1.00162	0.982176	0.998381	0.999622	0.992993	1.00241	0.996005	1.00685	1.01395	1.0095	0.986091	0.990668	0.968824	0.977145	0.985319	0.993679	0.989457	0.98749	1.00142	1.00201	1.01482	1.01307	1.00803	0.997221	0.998341	0.998996	0.997813	1.02044	1.01497	1.02114	1.01197	0.99453	1.01698	1.01241	1.02711	1.00724
	1.30133	0.996612	0.990778	0.983012	0.993309	0.99013	0.969019	0.990658	0.991345	1.0008	1.00123	1.00968	0.985121	0.997802	0.982143	0.986538	0.993299	1.00992	1.00292	0.989541	1.01701	1.02647	0.988555	0.995674	0.971811	0.958212	0.994874	1.00253	1.00042	0.994321	0.992863	0.993974	1.01844	1.01253	1.01742	1.00983	1.00112	1.00769	0.995441	0.994825	1.02196	1.02348	1.02061	1.01362	1.00917	1.0035	1.01156	1.0308	1
	1.30123	0.993548	0.984786	0.997691	0.975139	0.998586	0.977828	0.98696	0.999203	0.982899	0.996735	1.00858	1.0005	0.998329	0.969477	1.0013	0.986593	1.01781	1.00759	1.00838	1.02317	1.03623	1.00872	1.00432	0.998545	0.961245	0.979196	0.987239	1.00342	0.987664	0.992502	0.997866	1.00243	1.00224	1.01504	1.01733	0.989235	1.01499	1.00051	1.0082	1.00202	1.02168	1.02643	1.01305	1.00812	0.999515	1.01515	1.03529	1.01153
	1.30113	0.997636	0.964139	0.983662	0.985693	0.99953	0.984223	0.985062	1.0012	0.998051	0.995169	0.988391	1	1.00262	0.97888	0.984959	0.990873	1.0021	0.993414	1.01053	1.00408	1.01139	1.00148	1.0201	0.99576	0.977868	0.984821	0.988778	1.00759	0.989678	0.98781	0.990516	1.01223	1.00309	1.00816	1.01976	1.00575	1.00168	0.99949	0.999567	1.00242	1.02628	1.02355	1.01297	1.00094	1.01415	1.00728	1.02279	1.00494
	1.30102	0.988147	0.961094	0.984438	0.979011	0.99381	0.980458	0.978076	0.993822	1.0004	1.00573	1.00634	0.993879	0.996964	0.996635	0.993013	1.00881	1.00597	1.00567	1.00048	1.00262	1.00935	1.01237	0.981146	0.994879	0.990076	0.986543	0.977612	0.997017	0.983434	0.992073	0.99646	1.01023	0.99866	1.00315	1.02396	0.998829	1.00461	0.998425	1.00837	1.01311	1.01896	1.03032	1.00431	1.01362	0.988948	1.01953	1.01832	1.00697
	1.30092	1.0026	0.97492	0.98045	0.986301	0.984863	0.982336	0.984201	0.989996	0.99183	0.997903	0.997887	1.00413	0.990287	0.980347	0.990889	0.995798	1.01539	1.00402	0.999529	0.997875	1.01697	1.01023	0.995388	0.993358	0.98282	0.989011	1.00798	0.988769	0.994389	0.992922	0.99929	1.00653	1.00666	1.02175	1.01398	0.999415	1.01221	0.994701	1.02491	1.01543	1.0337	1.0277	0.998537	1.01119	1.01306	1.01694	1.02629	0.999484
	1.30081	0.98998	0.987442	0.9719	0.979924	0.99949	0.977912	0.971442	0.989267	0.999572	0.990061	1.00086	1.00419	1.00673	0.992411	0.998699	0.991939	1.00827	1.00418	1.00096	1.00387	0.995848	0.992869	0.987568	0.986557	0.97923	0.992034	0.989071	0.988838	1.00487	1.00712	1.01176	1.00287	1.00802	1.00412	1.01797	0.991889	0.990857	1.0085	1.0009	1.01986	1.02402	1.01603	0.994132	1.00655	1.00911	1.00943	1.02172	1.00803
	1.30071	0.984293	0.98152	0.98838	0.973654	0.984904	0.985582	0.976202	0.992067	0.987297	1.00135	1.00269	0.994801	0.995612	0.984424	1.00472	1.00811	1.00261	0.994813	1.00648	0.995923	1.00287	1.00163	0.994449	0.981623	0.983638	0.991133	1.0043	1.00633	0.9988	0.99331	1.00284	1.01356	0.995558	1.01903	1.01467	1.00234	1.00115	0.999472	0.998189	0.997478	1.01901	1.01879	1.0129	1.01098	1.00888	1.01506	1.02987	1.00757
	1.3006	1.00516	0.982655	0.98294	1.00122	0.992537	0.989562	0.9846	0.990865	0.999082	0.998138	0.99719	0.997057	0.991198	0.997717	0.984532	0.993952	0.997863	1.00522	0.997512	1.01399	1.01449	1.01619	1.00714	0.984639	0.984456	0.983284	0.992133	0.991402	0.984684	1.00548	0.993754	1.01066	1.00666	1.00568	1.01785	1.01053	1.00057	0.990135	1.0009	1.00849	1.01853	1.01736	1.00149	1.00808	1.00398	1.01845	1.01815	1.01402
	1.3005	0.988947	0.980471	0.992627	0.98398	0.979213	0.993304	1.00155	1.002	0.995642	0.996043	1.00443	1.00206	0.99035	1.00748	0.995805	0.994845	0.998318	1.00362	0.993677	1.009	1.00217	0.98124	0.997529	0.986356	0.97932	0.997459	0.993264	0.99387	0.997842	0.983775	1.00885	1.01543	1.01393	1.00052	1.00506	0.998236	0.994299	1.00105	1	1.02428	1.02361	1.029	1.01146	1.01343	1.01053	1.01629	1.01496	1.01055
	1.30039	0.99934	0.983108	0.977632	0.991369	0.993664	0.991304	0.969094	0.996465	0.995493	0.989372	1.00998	0.989345	0.999471	0.984127	0.989805	0.99489	0.999167	0.994882	1.01033	1.01888	1.00144	1.0043	1.00769	0.986777	0.976934	0.971385	0.998608	0.999543	0.988566	0.989682	0.994452	1.00486	1.01985	1.00154	1	1.00176	1.00572	1	1.00868	1.01282	1.01841	1.01139	1.00856	1.02103	0.994505	1.02313	1.01415	1.00816
	1.30029	1.00205	0.987871	0.982713	0.98601	1.00293	0.983412	0.975383	0.996335	1.00154	1.01799	0.993464	1.0263	0.990028	0.984729	1.00616	1.0048	1.01407	1.00407	1.00319	1.00308	1.00284	1.00784	0.977835	0.984034	1.00279	0.978341	0.992802	0.987709	0.987255	1.00042	0.992925	1.01055	0.991316	1.00613	1.02323	1	1	0.994211	1.00911	1.0034	1.02408	1.03809	1.01832	0.998565	1.00905	1.02306	1.0178	1.01927
	1.30019	1.00276	0.977351	0.998654	0.994417	0.980105	0.989765	0.997749	0.990359	0.997869	0.993048	0.997878	0.993135	0.993976	0.992612	0.996269	1.00471	0.993931	1.00106	1.00233	1.01777	1.00282	1.00952	0.975043	1.00174	0.98282	0.980609	0.994913	0.984748	0.990319	0.993267	1	1.00509	1.00227	1.01459	1.00451	1.01368	1.01391	0.995724	1.00556	1.02939	1.02026	1.02552	1.01958	1.0212	0.997475	1.00302	1.0186	1.01109
	1.30008	0.994444	0.993031	0.986019	0.985384	0.988331	0.99287	0.98337	0.996183	0.996807	0.992877	0.997862	1.00775	1.00803	0.993059	0.989094	1.00307	0.985022	0.993517	1	1.00366	0.98913	0.996735	0.994872	0.978596	0.969477	0.980359	1.00052	1.00315	1.00202	1.00474	0.991433	1.0197	1.00943	1.01575	1.00448	1.02004	1.00342	1	0.995918	1.00639	1.02567	1.03057	1.0056	0.996159	1.001	1.02115	1.00586	0.991688
	1.29998	0.995219	0.98661	0.983718	0.971059	0.984375	0.976107	0.971302	1.00437	1.00972	0.999442	0.998323	1.00797	1.00494	0.979493	1.00148	0.987404	0.995542	0.988901	0.999511	1.01713	1.00532	0.996808	0.990961	0.995805	0.992593	0.976177	0.99148	0.98576	1.00155	0.992149	0.998373	0.998214	1.00762	1	1.00992	1.00058	1.01157	0.981977	1.01372	1.01493	1.02022	1.02362	1.00502	1.01222	1.01754	1.02274	1.03696	1.00208
	1.29987	0.995918	0.999294	0.979647	0.978657	0.989911	0.983343	0.983544	0.995119	0.99087	0.991041	0.999422	0.985855	1.00187	0.991639	0.994062	0.981481	0.996298	0.983754	0.996006	1.01154	1.01172	1.00394	0.978775	1.00574	0.976995	0.983081	0.993475	0.993923	1.00846	0.990946	1.0106	1.00092	0.996049	1.01224	1.01903	1.01129	1.00579	0.996325	1.0155	1.01566	1.01	1.01118	0.993457	1.01222	1.00701	1.0075	1.01004	0.984927
	1.29977	1.00402	0.989108	0.984211	0.987554	0.995865	0.983549	0.965499	0.985043	0.986766	1.00952	1.00114	1.01381	1	0.991578	1.00914	0.990619	0.994077	0.994839	0.997978	0.997814	1.01271	0.999192	1.00556	0.993666	0.967764	0.991468	0.98821	0.997778	0.99472	0.978184	1.00346	1.0165	1.0005	1.01786	1.00723	1.01095	1.00292	1.00793	0.991131	1.00585	1.02023	1.01831	1.00602	1.00431	1.01567	1.01697	1.00949	1.00361
	1.29967	0.990691	0.972789	0.977749	0.997506	0.986975	0.979327	0.979569	0.993513	0.993033	0.992746	0.988055	1.00444	0.995463	0.993578	1.00259	0.989454	1.00465	1	1.00678	1.01566	1.02551	1.01086	1.0033	1.00402	0.98745	0.987048	0.99519	1.00111	0.995261	0.990702	0.9973	1.00916	1.0096	1.01349	1.01261	1.02211	1.00618	0.990603	0.999545	1.01349	1.02515	1.02343	0.999495	1.01204	0.994475	1.00646	1.01586	0.985582
	1.29956	0.998049	0.978695	0.97426	0.991315	0.98997	0.968066	0.976821	1.00601	1.00161	1.00225	0.994869	0.989506	1.00131	0.990413	0.996827	0.990225	1.01167	0.992083	1.0027	1.00855	1	1.01744	1.00514	0.980048	0.983913	0.977356	1.00155	1	0.991654	0.996373	0.991659	1.01807	1.00863	1.02251	1.01426	0.998656	0.99678	1.00174	1.00697	1.00043	1.0182	1.02201	1.02078	1.00145	1.0005	1.03103	1.02004	0.997353
	1.29946	0.997529	0.977676	0.967439	0.996315	1.00058	0.967466	0.982609	0.983288	0.996253	0.979989	1.0051	0.99566	1.00393	1.00476	0.99841	0.989557	1.01215	0.993876	1.01234	1.00498	1.00876	1.01154	0.999115	0.9799	0.983628	0.992727	1.01119	1.00055	1	0.996891	1.00617	1.00726	1.01338	1.00898	1.01456	0.98954	1.00202	1	0.990768	1.00699	1.02706	1.0286	1.01144	0.998081	1.01402	1.01582	1.01851	1.00417
	1.29935	0.998813	0.988206	0.9725	0.993865	1.00352	0.989205	0.994051	0.990821	1.00482	0.997183	0.992542	0.991363	0.990741	1.01091	0.970992	1.00661	0.998935	0.995575	0.990444	1.00893	1.0166	1.01386	0.991674	1.0018	0.984061	0.979156	0.97998	0.99569	0.985808	0.986667	1.00095	0.990715	1.01204	1.00921	1.00277	1.00439	1.01321	1.00308	1.00827	1.0229	1.01315	1.01168	1.01562	0.995671	1.00956	1.02529	1.03777	0.998962
	1.29925	0.974888	1	0.97494	0.986581	0.975798	0.98259	0.988607	0.996827	0.98444	0.985596	0.999427	1.00816	0.982005	0.984127	0.986214	1.00306	0.999464	1.01285	1.00522	1.01318	1.00423	1.00573	0.986854	1.00748	0.967129	0.980832	0.995968	1.01163	0.984752	0.992008	0.994933	1.00386	1.02608	1.01653	1.01247	1.01985	0.998573	0.977429	1.00357	1.0041	1.01741	1.02123	1.02269	1.00432	1.001	1.01055	1.01736	1.01839
	1.29914	0.98545	0.977594	0.991013	0.993166	0.995156	0.985181	0.981875	1	0.986274	0.983343	1.00504	1.00942	1.00465	0.994549	0.989768	0.988566	1.00272	0.994812	1.0042	1.03053	1.00962	1.00996	0.987391	0.978785	0.972613	0.969858	0.989829	1.00639	0.984653	1.0025	0.99361	1	1.01467	1.00814	1.00073	1.00519	1.01255	0.998025	0.997819	1.01817	1.0136	1.02784	0.995415	1.01453	1.01178	1.02	1.02166	1.00313
	1.29904	0.997838	0.985714	0.983973	0.981142	1	0.98175	0.988636	0.99645	0.979862	1.01647	1.00324	1.00182	0.994071	0.988737	0.988704	0.988366	1.02013	0.989046	0.998199	1.009	1.01411	1.00201	0.991124	0.98913	0.997553	0.988184	1.01078	0.996739	0.991828	1.00102	0.998248	1.00356	1.02443	1.01103	1.00299	1.00152	1.01483	0.985245	0.993796	1.00955	1.0333	1.0273	1.01752	1.01411	1.00934	1.0207	1.02426	0.999471
	1.29894	0.993229	0.971111	0.994574	0.979253	0.996432	0.980598	0.972987	0.992075	1.00484	1.00053	0.996819	1.00534	1.00959	0.978098	0.989774	0.998493	0.987882	1.00065	1.00835	1.01637	1.00702	0.993097	0.990215	0.988361	0.985554	0.995636	0.993355	0.988895	0.997884	1	0.996957	1.0096	1.01484	1.01584	1.03202	1.00534	1.00372	1.00341	1.00984	1.02038	1.02966	1.02695	1.00867	1.01132	1.00996	1.01994	1.01793	0.998423
	1.29883	1.00624	0.991918	0.977903	0.989848	0.996456	0.965222	0.97654	0.98872	0.986269	0.986359	0.998411	0.993593	0.984049	0.994269	1.00214	0.991911	1	1.01225	1.0006	1.0117	1.00527	1.01217	0.980237	0.991115	0.987086	0.986014	1.01101	0.990111	0.995079	0.994262	0.990876	1.01279	1.01327	1.00512	1.0078	1.0101	1.00898	1	0.997043	1.01933	1.01787	1.03446	1.009	1.00477	1.00597	1.00661	1.03654	1.00639
	1.29873	1.01876	0.993707	0.990575	0.996585	0.99619	0.98088	0.968504	0.997633	0.992534	0.994419	0.993862	1.01197	0.996975	0.976641	1	0.995062	1.00053	1	1.00238	1.01014	1.00608	1.00498	1	0.989289	0.987903	0.986111	0.979989	1.00235	0.992201	0.981383	1.00719	1.00627	1.01888	1.0092	1.01115	0.993949	1.04106	1.01254	1.00945	1.00382	1.01969	1.02145	1.00418	0.991233	1.01294	1.01341	1.01792	1.00322
	1.29863	0.991772	0.986514	0.990215	0.977972	0.990165	0.980063	0.994709	0.974336	0.993761	1	0.996051	1.00056	0.987805	0.994152	0.973856	1	1.01565	1	0.995255	1.01013	1.00172	0.982249	0.977473	1.00784	0.986508	0.991819	0.990862	1.00995	0.969883	1.01044	1.00388	0.99836	1.00997	0.995398	0.995346	1.01518	1.00286	1.01102	1.00403	1.0072	1.03104	1.01866	1.00856	1.01206	1.01999	1.03674	1.03166	1
	1.29852	0.998064	0.993523	0.975938	0.976136	0.991031	0.98737	0.992716	0.984784	0.996627	1.00688	0.98747	1.00435	0.998872	1.00153	0.994189	0.999531	1.00239	1.01265	0.995887	1.02123	1.01681	1.00404	1.01313	0.979788	0.975436	0.978777	0.977156	1.00118	0.985884	1.00952	0.99558	1.01244	1.00121	1.01854	1.01441	1.00689	0.993183	1.00196	1.00941	1.01078	1.01477	1.03876	1.01666	1.00962	1.02054	1.03523	1.01921	0.986402
	1.29842	0.991429	0.986849	0.997633	0.984382	0.993819	0.976858	0.975899	0.99179	0.994391	0.985017	0.999097	0.988781	1	0.973497	0.990553	0.997308	0.997727	1.00683	0.998872	1.00067	1.01938	1.00893	0.989184	0.991329	0.98056	0.972973	0.990852	0.993634	1.00396	1.00652	0.992172	1.01591	1.01535	1.00694	1.01694	1.00281	1.00135	1.02128	1.01351	1.00495	1.0287	1.01852	1.01152	1.00495	1.01133	1.01667	1.02949	0.985611
	1.29831	0.993336	0.97695	0.991033	0.989565	0.985159	0.97694	0.987644	0.988022	0.999222	0.975294	0.994709	1.00498	1.00103	0.993148	0.982774	1.00176	1.00448	1.01451	0.996737	1.01313	1.01043	0.99503	0.98998	0.987595	0.975762	0.969623	0.994279	0.993645	1.00225	0.983324	1.01199	1.01222	1.00871	1.0184	1.02489	1.01945	1.00351	0.997549	0.995647	1.01863	1.04391	1.02351	1.01987	1.00689	1.00404	0.993451	1.0194	1.00517
	1.29821	0.987234	0.975291	0.97905	0.98232	0.982128	0.991604	0.981407	0.99015	0.982517	1.0074	1.00422	0.99282	1	0.999104	0.990833	0.99118	1.00576	1.00551	1.0059	1.02416	1.02594	1.01178	0.983284	0.999025	0.987352	0.997525	0.988751	0.985665	0.996141	0.989201	0.99504	1.0174	1.01129	1.02533	1.01692	1.01252	1.01195	0.999377	1.00374	1.01903	1.03005	1.02578	1.00414	1.01033	1.02164	1.01289	1.02293	1.00862
	1.29811	0.979465	0.976834	0.98271	0.972031	0.993644	0.974555	0.974108	0.989871	0.989575	1.00164	0.991439	0.999077	0.99512	1.00832	0.973759	0.994368	1.00131	1.00482	1.01637	1.01359	1.00611	1.0038	1.00295	1.00097	0.977273	0.991975	0.989296	0.978321	0.98617	0.987173	1.00392	1.0052	1.03101	0.987752	1.00308	1.00557	0.991519	0.995527	1.01391	1.01267	1.01302	1.01194	1.01083	0.99871	1	1.00841	1.03014	1.00463
	1.298	0.978081	0.98967	0.996209	0.978779	0.989225	0.980753	0.984442	0.994628	0.988132	1.00122	1.00163	1.00493	0.997627	0.985813	0.994783	1.00438	1.00131	0.985923	0.981969	1.02065	1.00375	0.992754	0.974672	0.982226	0.99444	0.993064	1.00057	0.992746	0.993684	1.00537	1.00545	1.01529	1.01668	1.01121	1.01266	0.982899	0.990536	1.00067	1.01264	1.00728	1.03034	1.01886	1.00936	1.00651	0.997284	1.03333	1.01964	1.00414
	1.2979	1.00499	0.982134	0.998572	0.98308	1.00124	0.967307	0.980993	0.986797	0.996221	0.995964	0.995966	1.00619	1.00556	0.98942	0.986719	0.999242	1	0.998997	1.00048	1.01467	1.00537	1.01713	1.0073	0.979223	0.974596	0.992424	0.986207	0.99317	0.986104	1.00893	1.00192	1.01316	1.0152	0.998533	1.01274	1.02259	1.00241	1.00902	1	1.0276	1.02432	1.01496	1.01426	1.01824	1.00687	1.03696	1.03077	0.987297
	1.29779	0.994	0.977103	0.990887	0.984581	0.976792	0.977769	0.984139	0.997356	1.00822	0.99491	0.997596	0.996082	0.99909	1.00209	0.996545	1.00074	1.01147	1.00144	1	1.00874	1.01608	1	0.989501	0.995759	0.969675	1.00121	0.974432	0.991511	0.991095	0.990042	0.999532	1.00959	1.01075	1.01188	1.01257	1.02609	1.0163	0.987779	1.01945	1.02152	1.02753	1.0268	1.01167	0.997475	1.0068	1.02096	1.01499	1.01684
	1.29769	0.992489	0.9913	0.988889	0.974756	0.988324	0.981544	0.98417	1.00229	0.998886	0.987539	0.998397	0.996522	0.999546	1.00948	0.980068	0.997845	1.005	0.998101	0.999097	1.01939	1.02199	1.00338	0.989149	0.989575	0.974377	0.991615	1.00585	1.00773	0.988988	0.992268	1.00514	1.01221	1	1.00515	1.02078	0.999169	1.00824	0.991888	0.999377	1.01761	1.04195	1.03511	0.991094	1.01279	1.00609	1.00758	1.03338	0.994087
	1.29759	0.997005	0.983086	0.989816	0.983878	0.982966	0.970248	0.987165	0.983359	0.984943	0.998835	0.998032	0.997834	0.996405	0.983633	1.00037	1.00246	1.01541	1.00046	0.992184	1.0101	1.02207	0.999213	0.989891	0.991506	0.994754	0.994292	0.991658	1.00052	0.98968	0.989632	1.00892	1.01532	1.00789	1.00141	1.01507	0.999166	1.00406	0.999259	1.00253	1.02035	1.02367	1.01428	1.00392	1.01579	1.00995	1.01295	1.03556	0.99564
	1.29748	0.988978	0.986632	0.994106	0.977117	0.981021	0.982008	0.975828	1.00498	1.0041	0.996905	1.00397	1.00695	1.00181	0.99186	0.981805	0.996497	1.00633	1.00422	0.990125	1.00579	1.01183	1	0.985789	0.990943	0.985369	0.986147	0.985412	1	0.996971	0.987173	1.00474	1.00945	1.00849	1.00488	1.01144	1.00491	1	1.00296	1.01943	1.01128	1.02156	1.02949	1.00741	1.01529	0.998692	1.0209	1.00509	1.01178
	1.29738	0.996495	0.995387	0.993634	0.96748	0.982657	0.985188	0.983488	0.986159	0.988315	0.992079	0.999191	0.991699	0.989593	0.988687	0.997027	0.987104	1.012	0.986965	1.00211	1.0155	0.994901	1.01513	1.00443	0.987332	0.981028	0.970443	0.990023	0.990249	0.996194	0.994581	1.00236	1.01244	1.00612	0.99864	1.01145	1.01133	1.00159	1.00074	1.00896	1.01204	1.02571	1.01997	1.01976	1.02214	1.01619	1.00539	1.00509	1
	1.29728	0.979602	0.98318	0.9942	0.981548	0.991041	0.991891	0.983685	0.992275	0.990527	1.00399	0.994792	1.00574	1.00137	0.991456	0.98689	1.0084	0.993326	1.00548	1	1.01821	1.02593	1.00913	0.980099	0.982979	0.985311	0.973734	0.99736	0.984579	0.99316	0.991379	0.996441	0.985808	0.995172	1.0123	1.01136	1.01519	1.00857	1.00144	0.999369	1.01562	1.02444	1.02281	1.01348	1.00201	1.00621	1.02935	1.0324	1.00283
	1.29717	0.99899	0.982857	0.992661	0.974126	0.992331	0.970865	0.990091	0.990909	1.00697	1.00935	1.00244	1	0.999071	1.00206	0.980741	0.988007	1.00485	0.99686	1.00126	1.01016	0.994495	1	0.982444	0.989518	0.978579	0.986818	0.98713	0.997692	0.991255	0.991405	0.989924	1.00359	1.02157	1.01276	0.993902	1.01596	0.984837	0.995789	1.00571	1.01924	1.0261	1.0278	1.01848	1.00411	1.01202	1.02058	1.02517	1.00728
	1.29707	0.987148	0.980173	0.988478	0.993665	0.981203	0.993151	0.969697	0.990916	1.00387	0.994373	0.99754	1.00269	0.993956	0.988482	1.00112	1.00534	0.996681	1.00222	1	1.01954	1.01897	0.993002	0.99861	0.987846	0.989433	0.984534	0.988353	1	0.995303	0.992007	1.01158	1.01499	1.02227	1.0258	1.00601	1.00314	1.0127	0.993216	1.00186	1.0089	1.0122	1.03004	1.00349	1.01094	1.02352	1.00995	1.01711	1.00808
	1.29696	0.999506	0.993942	0.985521	0.986161	0.992331	0.978224	0.9836	0.987674	0.986133	0.984502	1.00247	1.00359	1.0033	1.00169	0.983545	0.997842	1	0.996905	1.00333	1.01387	1.02239	1	0.999308	0.975051	0.976885	0.987071	1.00881	0.992238	0.983684	1.00128	1.0077	1.01576	1.01238	1.01711	1.01792	1.00311	1.01426	1.00343	1.00917	1.0058	1.03331	1.02528	1.01249	1.0061	0.993697	1.00847	1.04135	1.01351
	1.29686	0.990557	0.973896	0.98621	0.991391	0.992304	0.98035	0.988339	1.002	0.981125	0.997491	0.987347	0.99416	1.00522	0.986198	0.985103	0.988735	1	0.99822	1.00334	1.01682	1.01936	1.02159	0.987101	0.98929	0.977273	0.973592	0.99496	1.00174	1.00735	0.996633	1.02066	1.00524	1.01734	1.03395	1.00488	1.00694	1.00149	1.00135	1.00358	1.00845	1.02698	1.03719	1.0143	0.99933	1.01625	1.01893	1.01477	1.01505
	1.29676	0.982257	0.980139	0.983365	0.979964	0.999146	0.987548	0.978182	0.997597	0.995741	0.99755	1.00876	0.985195	1.00559	1.00298	0.989985	0.997433	1.00534	0.999554	1.01382	1.00187	1.02218	1.00837	1.00414	0.983289	0.974289	0.976385	1.00325	0.994529	0.995462	0.993957	1.00659	1.00732	1.01429	1.01843	1.02484	1.02086	0.980728	1.00201	1.00766	1.00755	1.03262	1.02339	1.00387	1.00784	1.00755	1.01025	1.02415	1
	1.29665	0.9925	0.969682	0.991779	0.974313	0.988105	0.976038	0.980653	0.993195	0.994066	0.989635	0.990822	1.00091	1.00142	0.991866	0.981323	0.995908	0.998051	1.00229	1.00503	1.01016	1.0031	0.978576	0.98488	0.989305	0.97135	0.98713	0.990822	0.995439	0.991903	0.99764	1.00824	1.01158	1.01079	1.0173	1.00602	1.00537	0.997927	1.00941	1.00706	0.993229	1.0345	1.01827	1.01401	1.00127	1.01149	1.02129	1.01537	1.01865
	1.29655	0.998492	0.99389	0.994166	0.989096	0.998296	0.998706	0.970623	0.993636	0.990242	0.993781	1.00872	1.00964	1.00528	0.996587	0.989776	0.985213	0.990333	0.992252	1.00843	1.02234	0.993711	0.99101	0.99306	0.976836	0.976282	0.979906	0.989562	0.985726	0.988698	0.992808	0.985886	1.01007	1.02487	1.01386	1.00703	1.01757	1.00261	0.993723	1.0098	1.00951	1.0398	1.02062	1.01004	1.00496	1.00399	1.02187	1.02159	0.998603
	1.29645	0.99599	0.987774	0.979808	0.995436	0.990678	0.981616	0.975207	0.992493	0.994134	1	1.00421	0.996843	1.0014	0.99067	0.994953	0.986367	1.00272	1.0073	1.01135	1.00096	1.00311	1.00755	1.0021	1.01214	0.971117	0.995695	0.999601	0.979469	0.98993	0.989853	0.991	1.00364	0.994607	1.00974	1.01147	1.01308	1.01534	1.00406	1.00977	1.01592	1.02229	1.02105	0.998776	1.016	1.01619	1.01404	1.02663	1.00543
	1.29634	0.984725	0.995866	0.993124	1.00687	0.98209	0.982706	0.982456	0.991736	0.987872	0.999178	1.00546	1.00181	1.00189	0.996132	0.978964	0.993673	1.0055	0.987091	1.00729	1.00637	1.01196	1.00139	1.0007	0.990534	0.977765	0.985114	0.991587	0.994311	0.984965	0.986369	1.00411	1.00521	1.01574	1.01401	1.00787	1.01381	1.00648	1.00943	0.998467	1.01159	1.02621	1.02171	1.01689	1.00587	1.03687	1.00965	1.02538	0.985934
	1.29624	0.990946	0.977967	0.973064	0.98199	0.990752	0.98725	0.981267	0.99103	1.00039	0.99102	0.997502	0.993679	0.992019	0.998296	1.00514	0.987454	0.996101	1.00371	0.995692	1.01752	1.00503	1.02996	0.999289	0.995264	0.973771	0.98822	0.995589	0.993522	0.988523	0.989028	0.994882	1.00681	1.0224	1.02354	1.0195	1.00293	1.01568	0.994189	1.01446	1.01625	1.03077	1.01806	1.01872	1.00515	1.0115	1.0042	1.02279	1.00588
	1.29614	0.994405	0.981247	0.983981	0.991822	0.995772	0.975955	0.983187	0.993636	0.991755	1.00536	0.99376	1.00273	1.00659	0.988913	0.997661	0.99745	1.00696	0.982973	1.00348	1.00694	1.01217	0.998568	0.99437	0.977867	0.979283	0.997816	0.989152	0.985703	0.984878	0.984962	1.00685	1.00562	1.01058	1.02268	1.01152	1.00639	0.99094	0.999477	0.994077	1.01615	1.03629	1.02714	1.01755	1.00557	1.01973	1.015	1.0159	1
	1.29603	0.990182	0.98941	0.983149	0.990901	0.990542	0.979741	0.993445	0.990323	0.990529	1.00375	0.997493	0.99772	0.986963	0.985262	0.983471	0.992529	0.99611	1.00139	1.00307	0.99598	1.01067	1.00731	0.996382	1.00983	0.971831	0.999114	0.987092	0.995823	0.997242	0.982916	1.00521	0.998397	1.00804	1.00828	0.996696	1.00407	1.01726	1.00156	1.01582	1.02289	1.02083	1.02489	1.01614	1.0101	0.998815	1.02025	1.03197	1.01119
	1.29593	0.998495	0.988994	0.977885	0.979279	0.996565	0.975277	0.986747	0.99128	0.996466	1	0.990833	1.01044	0.994326	0.993174	0.982565	0.991894	1.01005	0.993622	0.990638	0.997039	1.01616	0.988489	0.995711	0.988475	0.970621	0.986951	0.988773	0.989243	0.97898	0.98941	1.00952	1.02329	1.00484	1.01986	0.997822	1.00925	1.01071	0.994929	0.999121	1.01463	1.03368	1.01849	1.01271	1.00371	1.00638	1.02463	1.02975	0.998779
	1.29583	1.00201	0.984375	0.986855	0.975124	0.985157	0.982825	0.976277	1.00603	1.0004	0.99014	0.987035	0.993258	0.991489	0.989303	0.987829	0.998518	1.01367	0.993059	0.998301	0.996592	1.0241	1.00657	0.992831	0.987569	0.973918	0.983857	0.997962	0.996279	0.995581	0.999224	0.997213	1.01058	1.0094	1.01907	1.01503	1.00352	1.01533	0.992904	0.997352	0.991847	1.0397	1.01698	1.0131	0.998504	1.00503	1.02069	1.03163	1.00993
	1.29572	1.00909	0.989873	0.976386	0.985474	0.982143	0.974457	0.97491	0.990916	0.996448	0.97538	0.990417	1.00736	0.996686	0.988922	0.986387	0.983007	1.00551	0.999078	1.00981	1.02307	1.019	1.00221	1.00654	0.986769	0.981513	0.987191	0.987825	0.994973	0.985277	0.996475	0.99789	1.01816	1.01253	1.02125	1.01613	1.0094	1.00621	0.99898	1.01138	1.0287	1.03287	1.02036	1.01441	1.01496	1.01481	1.02504	1.01651	1.01852
	1.29562	1.00702	0.976299	0.989315	0.973182	0.976803	0.985921	0.979667	0.98295	0.995272	0.998345	0.992908	1.00543	0.996214	0.990642	0.979703	1.0052	1.00782	0.993572	1.00828	1.00737	1.0077	1	0.97724	0.984962	0.979787	0.992799	0.99631	0.995795	0.995545	0.98908	1.01023	1.01196	1.01228	1.02091	1.0061	1.00236	1.01263	0.992883	1.00397	1.02009	1.01549	1.00688	1.0083	1.00426	0.998981	1.02517	1.03409	1.00785
	1.29552	1.00766	0.988815	0.986031	0.980935	0.995293	0.981474	0.978391	0.988732	0.996484	0.991773	0.994499	0.999085	0.990566	0.981108	0.988451	0.995903	1.00762	1.01445	1.01708	1.01662	1.00387	1.01006	1.01	1.00693	0.982964	0.988759	0.987572	0.996584	0.995927	0.996436	1.02411	1.01964	0.995	1.01425	1.0318	1.01013	1.01812	0.998441	1.01169	1.01464	1.02026	1.0256	1.00931	0.999052	1	1.01905	1.01056	1.00929
	1.29541	0.989076	0.981028	0.994206	0.990389	0.984486	0.983837	0.972397	0.994817	0.995331	1	0.993719	1.00046	1.01011	0.996114	1.00437	0.991035	1.00314	1.00557	1.00173	1.00604	1.01088	0.994282	1.00217	0.978897	0.983744	0.99865	1.00881	0.975011	0.985158	1.00278	1.00463	1	1.00965	1.00367	1.01285	1.00295	1.01796	1.00366	1.0054	1.03151	1.02545	1.03134	1.00632	1.017	1.0178	1.03314	1.02404	1.00768
	1.29531	0.991462	0.994911	0.975852	0.979317	0.997031	0.984208	0.977044	0.98846	0.98374	0.9921	0.998315	0.993685	0.998569	0.991786	1.00119	1.00676	1.00554	1.00188	1.00437	1.01821	0.99419	1.00936	0.992086	0.982081	0.98308	0.993243	0.988201	0.99103	0.998343	0.984009	1.00036	1.00803	1.00506	0.998946	1.01012	0.98997	1.0222	0.984054	1.0073	1.03235	1.02107	1.02094	0.993714	0.993355	1.00786	1.01385	1.00934	1.00052
	1.29521	0.982741	0.974477	0.984608	0.988149	0.991018	0.997378	0.974031	0.979447	0.991787	0.990883	1.00339	1.00998	0.984856	0.98914	0.985039	0.994037	0.998411	0.992991	1.00353	0.998472	1.00866	1.01112	1.00434	0.979267	0.978747	0.982982	0.988698	0.989247	0.983924	0.991536	1.00763	1.01493	1.007	1.01187	1.01326	1.00851	0.997665	0.999476	1.01005	1.00466	1.02228	1.02882	1.01901	1.00726	1.01099	1.01677	1.01621	1.01148
	1.2951	0.983607	0.97619	0.986969	0.974888	0.982218	0.978769	0.98671	0.988203	0.98071	0.99422	0.999177	0.992401	1.00466	0.991887	0.990927	1.00186	1.01269	1.00321	1.00172	1.01056	0.998695	1.00875	0.990641	0.97493	0.977528	0.986191	0.992475	0.983397	0.994222	1.00241	0.995649	1.00604	1.00944	1.01904	1.02916	1.01415	1.00407	1.01388	1.00225	1.0025	1.01114	1.03617	1.02868	1.00727	1.01351	1.02757	1.03968	1.01728
	1.295	0.98076	0.975794	0.988366	0.974253	0.988312	0.98766	0.984204	0.990767	0.993772	0.988372	1.00424	0.993176	0.992442	0.992238	0.992849	0.995492	1.00906	1.00092	1.00172	1.02034	1.00521	0.987752	0.991183	0.995784	0.978458	0.995518	0.988415	0.997427	0.98583	0.992424	0.994541	1.00474	1.00958	1.0126	1.01214	1.01046	0.998817	0.99892	1.01184	1.01541	1.03145	1.0191	1.02012	1.00778	1.01008	1.02413	1.01151	0.996333
	1.2949	0.991246	0.982224	0.98747	0.978519	0.9775	0.991558	0.980995	0.996815	0.99804	0.989243	0.995353	0.989991	0.99383	0.99426	1.00119	0.988131	0.995669	1.00092	1.00343	1.01418	1.00066	1.00735	1	0.997141	0.965497	0.984601	0.995403	1.00386	0.975354	0.996013	0.993555	1.00648	0.997169	1.01975	1.0176	1.01055	1.00238	0.993579	0.996265	1.00343	1.02579	1.01445	1.01826	1.00097	1.0005	1.01147	1.00572	1.00583
	1.29479	0.996875	0.975597	0.992661	0.992353	0.992265	0.980169	0.990392	0.992913	0.990265	1.0096	0.990437	1.00543	0.99615	0.988546	0.988147	0.997041	0.99883	0.991751	1.00478	1.01364	1.01373	1.00799	0.994199	0.995795	0.991249	0.978695	1.00085	0.999572	0.993007	0.986646	1.00072	1.01947	1.00329	1.02468	1.014	1.01608	0.993397	0.997294	1.01269	0.998711	1.02069	1.02221	1.02938	0.988423	1.002	1.02305	1.00368	1
	1.29469	1.00266	0.982282	0.995556	0.982926	0.980989	0.994363	0.98748	0.9968	1.0004	0.990852	0.999577	0.987353	1.01503	0.993441	1.0028	0.996205	0.994841	1.00939	0.983899	1.01967	1.00399	1.00892	1.0097	0.991477	0.987051	0.978032	0.992691	0.99913	0.993044	0.999599	1.0062	1.01507	1.00956	1.01261	1.01231	1.01765	1.02132	0.998363	0.997158	1.00352	1.03166	1.02268	1.01183	0.99516	1.01035	1.02584	1.02291	0.998909
	1.29459	0.99408	0.982239	1.00101	0.987822	0.988442	0.97227	0.989174	1.00278	0.990161	1.01177	1.0017	1.00271	0.993851	0.992194	0.993964	1.00377	0.994488	0.986245	1.00479	1.02057	1.00133	0.991876	0.99483	0.972535	0.978372	0.981685	0.986336	0.994012	0.978913	1.0024	0.994977	1.0132	1.00564	1.01081	1.02126	1.00371	1.01027	1.00108	1.00285	1.01449	1.03363	1.01893	0.998961	1.00902	1.0167	1.03816	1.01872	0.995575
	1.29448	0.991516	0.977879	0.998965	0.979592	0.980095	0.999131	0.966211	0.995566	0.986171	0.996253	0.999155	1.00322	1.0019	0.989669	0.999202	0.993516	1.00599	1	0.995631	1.00152	0.987475	0.999257	1.00292	0.966855	0.978699	0.993959	0.999562	1.00312	0.987411	0.985881	0.982709	1.00129	1.0024	1.01903	0.995392	0.995028	1.02195	0.994018	1	1.02051	1.01018	1.03985	1.00982	1.00811	1.00105	1.01361	1.016	1.01004
	1.29438	0.987349	0.966507	1.00217	0.967435	0.973475	0.979757	0.985921	0.995471	0.984133	1.00084	1.00952	1.00648	1.00096	0.988566	0.989833	0.994636	1.00323	0.992227	0.991247	1.0056	1.01183	1.01494	1.00671	0.984925	0.972222	0.974603	1.00477	1.01025	0.996144	0.989448	1.00037	1.0104	1.01859	1.01456	1.00348	1	1.0079	1.00546	1.01288	1.02492	1.033	1.02312	1.02781	1.0149	1.0053	1.02691	1.0131	1.00786
	1.29428	0.987269	0.986172	0.996629	0.980859	0.984629	0.978082	0.977273	1.00124	0.997597	0.997445	1.00947	0.990859	0.998093	0.993427	0.994019	0.995441	1.00635	1.00512	0.990422	1.01549	1	0.989788	1.0113	0.991489	0.969213	1.00415	0.9918	1.00452	0.986515	0.997124	1.00816	1.00562	1.01737	1.01271	1.00293	1.00747	1.01391	1.00054	1.00141	1.00745	1.02489	1.02106	1.02116	0.997437	1.01226	1.00995	1.02486	0.991081
	1.29417	0.998657	0.975974	0.981917	0.979693	0.983205	0.975712	0.999127	0.995323	0.982864	0.994442	1.00605	0.994432	0.998548	0.994276	0.980661	0.997333	1.00161	1.00185	0.994744	0.998469	1.01062	1.00297	0.987247	1.00502	0.970981	0.986746	0.998691	0.98963	0.997878	1	0.998525	1.00885	1.01268	1.03228	1.01018	1.00638	1.02203	1.00612	1.01163	1.01803	1.01519	1.01914	1.01448	1.0021	1.01669	1.00208	1.00677	1.01138
	1.29407	0.991041	0.961408	0.991783	0.989368	0.986245	0.98099	0.983208	1.00131	1.01208	0.988774	0.991541	1.00094	0.991791	0.992461	0.992662	0.995774	1.00936	0.988827	1.00308	0.996407	0.99734	1.00224	0.982733	0.982257	0.976838	0.982641	0.997015	0.996851	0.985569	1.00333	1.00902	1.01647	1.00195	1.00557	1.0252	1.00063	1.00865	1.00827	1.00095	1.02401	1.0163	1.02252	1.00861	1.00946	1.00432	1.01068	1.02687	1.00746
	1.29397	0.992461	0.96609	0.973231	0.981515	0.992469	0.982049	0.97405	1.0027	1.00338	1.00133	1.00269	0.99623	0.99135	0.996061	1.0004	1.00765	1.00284	0.993497	1.01696	1	1.00662	1.00671	0.970653	0.98784	0.97806	0.988569	0.98401	0.997791	0.987105	1.00207	0.985364	0.99823	1.01089	1.02184	1.00651	1.02663	1.00495	1.00327	1.01037	1.01128	1.02711	1.01745	1.01371	0.994265	1.01538	1.02799	1.02963	1.00569
	1.29387	0.990922	0.981767	0.991624	0.977804	0.990603	0.985205	0.982809	1.00607	0.981312	1.00139	0.987365	0.991827	0.997526	0.984354	0.99046	1.00434	0.990264	1.0019	1.0009	0.998447	1.00744	1.01132	1.00762	0.993631	0.975265	0.992523	0.996537	0.991597	1.00635	0.983911	1.00265	1.01604	1.00396	1.01361	1.01316	1.01332	1	0.986615	1.01113	1.02448	1.03403	1.01975	1.02507	0.995838	1.00721	1.02047	1.02125	1.01689
	1.29376	0.980099	0.967899	0.978044	0.96977	0.983607	0.982291	0.992424	1.00484	0.997764	0.999078	0.997188	1.00501	0.994908	0.996838	0.996715	0.991016	1.00248	1.01376	0.982842	1.00729	1.00339	0.993166	0.990342	0.995007	0.977051	0.973297	0.992567	0.993786	0.995819	0.985431	0.995155	1.0155	1.01127	1.01004	1.01844	1.00319	1.01129	0.986218	0.999515	1.0253	1.02543	1.04436	1.0167	1.01592	1.02314	1.01427	1.02865	0.997135
	1.29366	0.997097	0.975557	0.981907	0.99164	0.986959	0.984208	0.983988	0.979879	0.988769	0.991232	0.995327	0.995017	0.981623	0.987671	0.993305	1.00597	1.00705	0.991485	1.00672	1.00465	1.01524	1.00764	0.988756	0.981241	0.979204	0.978952	0.994288	0.984774	0.984441	0.995438	1.00789	1.008	1.00439	1.01645	1.01737	1.01744	1.00434	0.996678	1.01772	1.01679	1.02299	1.03263	1.01245	1.0037	1.01426	1.03497	1.02048	1.00805
	1.29356	0.992481	0.984479	0.992867	0.983957	0.977025	0.974526	0.976089	1.01374	1.01015	0.989163	0.996615	1.00669	1.01281	0.990575	1.00087	0.993257	0.992083	0.995788	0.997313	1.01262	0.99061	1.00847	0.999229	0.973439	0.975694	0.992366	0.99955	1.00686	0.989168	0.988255	1.00113	1.01478	1.01089	1.0091	1.02578	1.00322	1.01061	1.00836	1.00482	0.999537	1.01736	1.0412	1.00327	1.02172	1	1.00538	1.02597	0.994731
	1.29345	0.985108	0.988789	0.974612	0.990629	0.993317	0.985472	0.977945	1.00107	1.00689	0.994186	1.00982	0.983693	1.00796	1.00436	0.98703	0.99033	1.00752	1.01095	1.00675	1	1.0081	1.01677	1.02221	1	0.97795	0.984127	0.998625	0.986782	0.992126	0.990033	1.01414	1.00939	1.01963	1.02041	1.00721	1.0155	0.992063	1.01379	0.998565	1.00584	1.01953	1.03539	1.00681	1.00724	1.018	1.01731	1.01261	0.993682
	1.29335	0.998491	0.969127	1.00798	0.995202	0.976947	0.972923	0.986325	0.984958	0.993015	0.987093	1.00165	0.991266	1	0.994587	0.977283	0.999155	0.993478	1.01027	1.00182	1.01435	1.00481	0.990776	0.999232	0.991098	0.968263	0.989305	1.00653	1.01064	0.98931	0.986152	1.00547	1.00553	1.01106	1.01499	1.0037	1.02332	0.981413	1.00564	1.00393	1.01452	1.0242	1.03569	1.01025	0.99262	1.02326	1.02015	1.02093	1.01739
	1.29325	0.999251	0.978342	0.974017	1.00206	0.982716	0.978084	1.00059	0.9749	0.982901	1	1.00174	0.99252	0.999436	0.980592	0.995683	0.978046	1.00446	1.00926	1.00757	1.0187	1.02293	0.996944	0.998485	0.98022	0.981651	0.976813	0.987683	1.00759	0.985294	0.998285	1.01879	1.01486	1.01879	1.01552	1.01519	1.01573	1.0025	1.00168	0.99804	1.00644	1.02294	1.01552	1.00324	1.0016	1.00447	1.03189	1.01633	1.00993
	1.29314	1.00298	0.969562	0.97305	0.980511	0.998733	0.999363	0.977634	0.984211	0.992045	0.99051	1.0024	0.996403	0.99114	0.992412	0.99801	1.00221	0.996387	1.00529	1.00251	1.01521	1.01781	1.00152	1.00471	0.98449	0.98714	0.997596	0.992873	0.992575	0.984134	0.987983	1.01846	1.01589	1.01187	1.01849	1.02372	1.02102	1.0241	0.994512	1.00674	1.02441	1.02878	1.03786	1.01464	1.01366	1.01294	1.01616	1.0328	1.00868
	1.29304	0.983138	0.992447	0.984127	0.966553	0.991772	0.991054	0.971924	0.995215	1.00234	1.00498	0.994393	0.993773	0.993099	1.00224	1.00156	1.00272	0.989091	0.993569	1.00772	1.01772	1.01687	1.01157	0.987402	0.987906	0.965144	0.983559	0.98417	0.998109	0.987865	0.996979	1.01195	1.02169	1.00214	0.99359	1.00675	1.0247	1.0025	0.98654	1.01559	1.0138	1.02963	1.01761	1.01523	1.02141	1.00226	1.02004	1.028	1.0041
	1.29294	1.02654	0.976761	0.983193	0.977318	0.986259	0.986241	0.987589	0.985748	0.99827	0.995708	0.988875	0.987821	0.99678	0.997079	1.00157	0.995804	1.00432	1.0055	1.01171	1.00658	1.01217	1.00564	0.995242	0.992419	0.983529	0.969455	0.99048	1.00332	0.986673	0.996147	1.01166	1.00392	0.999452	1.02251	1.01993	1.00734	0.997517	0.99888	1.01316	1.03103	1.01995	1.02464	1.02803	0.996822	1.01006	1.03394	1.01402	1.02162
	1.29284	1.00573	0.986833	0.981557	0.989933	0.989893	0.987898	0.982079	0.985057	1.00118	0.99566	0.994282	1.00397	1	0.987842	0.982114	0.992636	0.995925	0.990508	1.00564	1.02046	1	0.988186	1	0.984484	0.987303	0.992782	1	0.987969	0.99195	0.998293	1.00844	1.01339	1.01448	1.00862	1.00839	1.02274	1.00381	0.99333	1.00394	1.00825	1.03282	1.03521	1.01333	1.00374	1.0157	1.02303	1.01259	1.00363
	1.29273	1.00426	0.986467	0.983729	0.994712	0.973668	0.987734	0.977218	1.0012	0.996409	0.994969	0.992998	1.00626	0.990351	0.98805	0.994912	0.998964	1.00275	0.993593	1.00945	0.998195	1.00397	0.991282	1.01313	0.988496	0.97931	0.981068	0.994877	1.01284	0.990604	0.973134	1.00041	1.01046	1.01594	1.01596	1.01003	1.00141	0.996669	1.00749	1.02053	1.01441	1.02506	1.01982	1	0.999464	0.997783	1.01276	1.02248	1.00499
	1.29263	0.981919	0.9753	0.996559	0.975049	0.970067	0.995572	0.979677	0.982322	0.998227	1.00627	1.0051	0.998639	0.98519	0.998098	1.00349	0.993555	0.988611	1.00243	1.0088	1.01009	1.00558	0.995532	1.0027	0.973199	0.97029	0.981209	0.997188	1.0059	0.998662	0.993543	1.00925	1	1.00927	1.00691	1.00526	0.995125	0.990691	0.998837	1.00496	1.02162	1.02792	1.0323	1.01443	1.00319	1.01174	1.02655	1.02361	0.994438
	1.29253	0.993797	0.980714	0.980309	0.971279	0.97276	0.974795	0.992891	0.995796	0.995255	0.986224	0.986521	1.01313	0.9964	0.978655	0.993452	0.992214	1.00889	0.99553	1.01215	1.00135	1.01614	0.996364	0.993578	0.995675	0.967468	0.969499	0.98091	1.0015	0.980309	0.997787	1.01054	1.02109	1.00054	1.01982	1.01609	1.00563	1.00415	1.00478	1.02448	1.00717	1.02166	1.02204	1.0182	1.01031	1.01826	1.03331	1.00585	1.00736
	1.29242	0.979443	0.974825	0.981532	0.994667	0.980746	0.982132	0.990341	0.990671	1.00476	0.988191	0.982748	0.987179	0.970609	0.987694	0.987327	0.995444	1.00235	1	1.00121	1.0097	1.01131	0.990826	1.00729	0.983022	0.982906	0.996002	0.984103	0.996392	0.987025	0.994573	1.00811	1.01952	0.995243	1.03072	1.0054	1.00645	1.01466	1.00118	1.01178	1.02122	1.01216	1.01888	1	1.00647	1.01911	1.0513	1.03708	1.00599
	1.29232	0.985341	0.982539	0.983585	0.992777	0.979141	0.995682	0.982701	0.991404	0.983149	0.993163	1.0058	0.994561	0.997886	0.976908	0.991582	0.986984	1.01077	0.982678	0.993142	1.00072	1.02624	0.999043	1.0076	0.976231	0.972896	0.972334	1.01024	0.989931	0.97267	1.0028	0.998774	1.0072	0.987926	1.02368	1.01335	1.00502	0.998589	0.995089	1.00311	1.01829	1.0264	1.03104	1.0028	0.99679	1.00955	1.01278	1.01984	0.996475
	1.29222	0.969769	0.970205	0.974065	0.984087	0.984117	0.977132	0.992533	0.992433	0.980995	0.988663	1.00442	1.00269	1.01577	0.986346	0.995181	0.989784	0.982779	0.995882	1.00451	0.995522	1.01408	0.996951	1.0051	0.987929	0.979725	0.995894	0.99729	0.986265	0.988407	1.00472	1.00754	1.01667	1.01196	1.01429	1.00795	1.01138	1.00912	1.0057	1.01472	1.01384	1.02109	1.0159	1.00617	1.00218	1.0107	1.00838	1.03279	1.0012
	1.29212	1.00171	0.982655	0.994299	0.986269	0.992563	0.974112	0.988662	1.00925	0.998909	0.979272	0.985384	0.998681	0.994409	0.993582	1.00419	1.00057	1.01963	0.991848	0.993515	1.01228	1.0019	1.02674	0.976166	0.990412	0.983434	0.990082	0.998908	0.983498	0.993753	0.999044	0.995697	0.999019	0.99621	1.02713	1.01299	0.996606	0.997973	0.996193	1.0073	1.01988	1.03407	1.00988	1.01427	1.00387	1.01089	1.00829	1.02145	1.01337
	1.29201	0.989944	0.961628	0.980447	0.97651	0.980274	0.972044	0.978723	0.993714	0.983471	0.993771	0.999408	1.00194	0.981532	0.996793	0.997636	1.00573	0.996966	1.00207	1.01363	1.01313	1.00783	0.981896	0.977683	0.979879	0.996779	0.973052	0.985202	0.995935	0.998896	1.01482	0.997733	1.00677	1.00456	1.00811	0.98838	0.990457	1.00692	0.996825	1.01587	1.01993	1.02263	1.00636	1.01815	0.988453	1.00751	1.02079	1.03837	1.01324
	1.29191	0.985397	0.981419	0.991615	0.991629	0.973447	0.978524	0.979109	0.978555	0.994388	0.986542	0.996466	1	1.00961	0.995527	0.994709	1.00114	0.999394	0.99583	0.989671	1.0239	1.02293	1.00986	1.00768	0.993878	1	0.977955	0.982456	1.01028	0.993289	1.00746	1.0029	1.02251	1.01244	1.02466	1.01852	1.02101	0.993984	0.996917	1.0126	1.02309	1.03578	1.02635	1.01356	1.0159	1.01465	1.0117	1.04594	0.996139
	1.29181	0.983684	0.976681	0.978249	0.984607	0.992393	0.980977	0.968172	0.999466	0.983987	0.986502	0.985924	0.995101	0.998061	1.00435	1.00353	1.00667	1.00179	0.993923	0.996161	1.02147	1.00589	1.00763	1.00108	1.00203	1.00165	0.985256	0.993954	0.992059	0.98995	0.984896	0.999505	1.00643	1.00551	1.01673	1.01512	0.993188	1.00468	0.995703	1.01349	1.0252	1.02185	1.02345	1.00844	1.01261	1.01255	1.02627	1.01797	1.00263
	1.29171	0.982641	0.971703	1.00052	0.98643	0.979779	0.985619	0.984951	0.983736	0.989207	1.00528	0.989929	0.994969	0.999366	1	0.981271	0.993979	0.997653	0.98645	1.01102	1.02916	1.01961	0.993513	1.00548	0.969728	0.979644	0.995951	0.994361	0.994962	0.997062	0.995164	1.00202	1.00847	1.00717	1.0119	1.01559	1.00584	0.995962	0.990148	1.00108	1.01967	1.0135	1.02423	0.99866	1.00661	1.01268	1.01702	1.026	1.00068
	1.2916	0.985722	0.986141	0.979438	0.990191	0.968313	0.991609	0.976595	0.997126	0.99747	1.00385	0.988869	0.996226	1.0065	0.996487	0.995044	1.0085	0.995413	1.00068	1.00257	1.00375	1.01075	0.998922	0.992366	0.987603	0.987234	0.98447	0.992429	1.00394	0.980665	0.994385	0.99802	1.01259	1.00066	1.0122	1.01696	1.01654	1.00424	1.00448	1.00666	1.01435	1.03062	1.02657	1.01736	1.02592	1.00554	1.02485	1.0274	0.996451
	1.2915	0.984144	0.988433	0.996	0.989933	0.979317	0.98482	0.981355	0.976863	1.01164	1.00307	0.987661	0.995059	0.996671	0.985874	0.994627	1.01055	1.00503	1.01215	0.999356	1.00305	1.01263	1.00962	1.00108	0.996849	0.980525	0.993848	0.992258	0.993399	1.00503	0.991856	1.00503	1.00237	1.00605	1.02532	1.00556	1.02431	1.01363	1.00262	0.9931	1.02533	1.02292	1.0206	1.01036	1.0187	1.00213	1.00068	1.03024	1.00628
	1.2914	0.996832	0.967437	0.988793	0.984203	0.983686	0.98894	0.985228	0.988474	0.993036	0.995035	0.999462	0.980523	0.978	0.97619	0.98536	1.00209	1.00271	0.98835	1.0077	1.0093	1.00098	0.998912	0.991238	0.986667	0.986722	0.996589	1	0.992652	0.985571	1.00485	1.009	1.01361	1.01495	1.01509	1.02736	1.01407	1.00405	0.995267	1.00921	1.02018	1.02914	1.0255	1.02014	1.00977	1.02395	1.00787	1.01353	1.00351
	1.2913	0.978534	0.980485	0.966552	0.97941	0.981353	0.994142	0.983319	0.978433	0.997284	0.99358	0.998955	0.99263	0.9943	0.976984	0.991521	0.997374	0.99788	0.982198	1.0075	1.01526	1.01475	0.995713	0.991534	0.969636	0.986907	0.995984	0.998065	1.00936	1.00763	0.977286	1.00871	0.993247	0.986477	1.0174	1.00494	1.00718	1.03165	0.988685	1.0178	1.00281	1.02109	1.0347	1.01506	1.00904	1.00924	1.02342	1.03004	0.982469
	1.29119	0.992569	0.97703	0.985915	0.979774	0.96791	0.972973	0.974306	0.977749	0.987826	0.998074	0.995511	0.989424	1	0.993645	0.984874	0.998427	1.00322	0.99348	1.00597	1.01199	1.00293	0.987124	1.01501	0.971115	0.978793	0.975674	0.993679	1.00134	0.985598	1.01028	1.00112	1.00714	1.01479	1.01874	1.00922	1.00903	1.00601	0.998493	1.00065	1.01341	1.01507	1.02633	1.00267	1.0026	1.015	1.00954	1.01548	0.999219
	1.29109	0.986737	0.990894	0.995415	0.98088	0.992407	0.974689	0.978661	0.997866	0.989805	0.99718	0.992729	0.998932	0.995019	0.986104	0.974657	0.999486	0.999453	0.99214	1.01123	1.02322	1.01355	0.985217	1	0.98999	0.976327	0.993417	1.0109	0.992243	0.981285	0.992267	0.995483	1.01889	1	1.02228	1.00086	0.998209	1.02003	0.986822	1.01311	1.02167	1.02118	1.03542	1.01273	1.00532	1.0216	1.03306	1.01887	1.01148
	1.29099	0.993668	0.963141	0.98004	0.996681	0.979869	0.989778	0.982522	0.997867	0.991279	0.995528	1.00431	1.00258	0.990875	0.998992	0.992729	0.998534	0.99681	0.995639	0.998823	1.01169	1.01115	1.02294	0.995789	0.981132	0.974277	0.980934	0.995592	0.999356	1.00625	0.998247	1.0039	1.00201	1.02097	1.02517	1.01397	1.00818	1.01135	1.01896	0.998596	1.00831	1.01223	1.02664	1.0109	0.994067	1.03774	1.013	1.01411	1.00551
	1.29089	0.990899	0.975728	0.988319	0.9971	0.987134	0.986559	0.98656	0.995743	0.997482	1.00403	0.987765	1.00753	1.00267	0.987506	1.00048	0.997162	1.00524	0.982032	0.984318	1.0075	1.01276	1.01025	1.00624	1.00199	0.981688	0.995296	0.993651	0.998714	0.987631	0.997057	1.02454	1.0142	1.00746	1.01614	1	1.01398	1	1.00079	1.00696	1.01458	1.0014	1.02226	1.02063	0.997247	1.00141	1.02652	1.02179	0.990698
	1.29078	0.988267	0.983324	0.981837	0.986408	0.987077	0.990579	0.992949	0.998724	0.999579	1.00447	0.995425	1.00445	0.997924	0.991172	0.988811	0.989106	1.00991	0.984033	0.998797	1.00346	1.01622	1.01685	0.990982	0.999046	0.988152	0.996695	0.978562	0.992458	0.994646	1.00283	0.993165	1.00647	0.984046	1.02694	1.02192	0.984962	1.0161	1.00796	1.00352	1.02961	1.01287	1.02204	1.01798	0.992987	1.02076	1.01691	1.03398	0.999218
	1.29068	0.986552	0.991319	0.984977	0.984043	0.980027	0.971656	0.972281	0.988584	1.00167	1.00582	0.979592	0.997556	0.98654	0.990654	0.997719	0.996053	0.995296	0.995578	1.01026	1.00693	1.00721	1.00391	0.998031	0.981533	0.985768	0.974391	0.993691	0.984049	0.990252	0.988531	1.01126	1.01693	1.00639	1.02337	0.996438	1.00664	0.992838	0.991311	0.990223	1.02296	1.02971	1.01876	1.00998	1.01154	1.01198	1.03771	1.02804	0.983871
	1.29058	0.979244	0.984316	0.985294	0.977207	0.984875	0.989096	0.98259	0.986887	0.997873	0.996831	0.98841	1.00246	1.00202	0.990741	0.999107	0.987617	1.00464	0.995785	0.989207	0.995212	1.03041	0.986274	0.99002	0.984559	0.98558	0.995221	1.00598	0.990792	1	0.986645	1.00304	1.00994	1.01933	1.03063	1.02054	0.988785	1.01012	1.00651	0.992226	1.0303	1.01534	1.01399	1.03018	1.01375	1.01326	1.01363	1.0237	0.990521
	1.29048	0.998388	0.977186	0.982915	0.980241	0.971277	0.979492	0.984447	0.998305	1.00126	0.99115	0.996315	0.995086	0.995978	0.985314	0.992105	1.01082	0.997778	1.00306	1.00414	1.01249	1.0199	1.00583	0.981535	0.980909	0.989591	0.969239	0.996644	0.986471	0.991634	0.997847	1.01251	1.02556	1.02113	1.02133	1.01742	1.01289	1.02644	1.00881	0.987225	1.03096	1.02243	1.02864	1.01427	1.00619	1.01912	1.03066	1.02054	0.990469
	1.29037	0.99	0.968612	0.982785	0.983973	0.979344	0.991368	0.985726	0.995699	0.988655	1.0054	0.992596	0.999005	1.00878	0.984446	0.994898	0.99262	1	1.00151	1.00606	1.00815	0.995961	0.987736	0.996116	0.986137	0.997067	0.978297	0.989136	0.982609	0.981132	1.00108	0.998511	1.0186	1.01836	1.00601	1.02864	0.990934	0.999116	0.989625	0.995723	1.02233	1.03259	1.01703	1.0175	1.01795	1.01121	1.01923	1.02256	0.976077
	1.29027	0.967313	0.987585	0.984623	0.992095	0.985081	0.988203	0.980202	0.990937	0.998309	0.997281	0.991585	1.01355	1.00206	0.986879	0.986307	1.00694	0.990944	0.997537	1.00344	1.01031	0.995302	0.994516	0.993365	0.977252	0.974164	0.969715	0.990317	1.00923	1.0055	1.00526	0.999019	1.00636	0.995533	1.02245	0.996782	1.02482	0.994876	1.00155	0.998606	1.00744	1.02434	1.02745	1.01584	1.01814	1.01061	1.02331	1.01191	0.999149
	1.29017	0.971508	0.969714	0.981393	0.976261	0.970694	0.967176	0.97374	0.999154	0.995849	0.994131	1.01253	1.004	0.993457	0.988372	0.996139	0.997978	0.994915	1.00145	1.00889	0.99589	1.01519	0.987983	1.00178	0.990468	0.973471	0.993972	0.983757	0.996137	0.982347	0.991654	1	1.02067	1.00923	1.01289	1.01428	0.998357	1.01233	1	1.01796	1.02755	1.02206	1.03525	1.02309	1	0.991318	1.02097	1.02719	0.981293
	1.29007	0.976504	0.967724	0.982814	0.975819	0.988863	0.97515	0.983621	0.991431	1	0.999092	0.997658	1.0015	1.00712	0.996272	1.00215	0.992759	1.00216	0.999041	1.00741	1.01409	1.02902	1.00334	0.985892	0.981775	0.969381	0.986534	0.991131	0.99441	0.985582	1.00387	1.00808	1.01139	1.01488	1.0171	1.01626	0.986047	1.02244	1.00144	0.979112	1.02524	1.02816	1.0401	1.02396	1.01427	1.02687	1.00805	1.01189	0.993897
	1.28996	0.994941	0.970438	0.989746	0.982671	0.980347	0.986066	0.977066	0.990464	0.977656	0.990946	0.999067	1.01284	1.00456	0.999535	1.00087	0.978998	0.997828	0.992809	0.986001	1.02214	1.01869	1.01447	1	0.981259	0.988975	0.982939	0.993541	0.998872	0.989209	0.987975	1.00823	1.01395	1.00936	1.00342	1.02135	0.996203	0.99115	0.997942	0.99106	1.01374	1.01999	1.01808	0.983371	1.01979	1.00162	1.02023	1.03472	1.00348
	1.28986	0.977235	0.966895	0.983422	0.985242	0.982555	0.979784	0.986877	0.994816	0.988151	1.00045	0.999534	0.991094	1.00151	0.993905	0.99436	0.995559	1.00699	1.00294	0.994385	1.00435	1.01791	1.02022	0.999226	0.982558	0.99328	0.985492	0.996925	1.00832	0.987914	0.987876	1.01211	1.00809	1.02076	1.01688	1.0169	1.00531	0.997137	0.99398	1.01104	1.02887	1.00854	1.02961	0.99703	1.03238	0.996815	1.02348	1.03002	0.999136
	1.28976	0.980802	0.966629	0.981431	0.974794	0.985735	0.977757	0.978892	0.986081	0.982143	0.981261	0.982807	1.01423	0.993374	0.993956	0.975022	1	1.00748	0.99753	0.992864	1.02875	1.00832	0.997726	0.972159	0.970714	0.982414	0.999489	1.00654	1.00324	0.988488	1.0015	1.0041	1.01734	1.02587	1.00592	1.01349	1.01238	1.00217	1.00067	1.00236	1.01625	1.03426	1.00813	1.00667	1.00985	0.998409	1.01118	1.01017	0.983857
	1.28966	0.99194	0.962521	0.977091	0.989707	0.971757	0.973371	0.989423	0.986684	1.00044	0.998155	1	1	0.992393	0.994465	0.984321	1.0029	0.991739	1.00642	1.00619	1.03081	1.02539	1.00983	0.99618	0.999283	0.98303	0.984752	1.00925	0.997445	0.983992	0.982353	0.996249	1.02674	1.01214	1.01227	1.00947	1.00998	0.997037	0.997377	1.00974	1.0284	1.01036	1.01632	1.01485	1.01538	1.03127	1.01859	1.01338	1.00171
	1.28956	0.973004	0.979827	0.982628	0.985515	0.990333	0.98736	0.982589	0.989213	0.980349	0.98409	1.00484	1	0.998445	0.997642	0.985345	0.986885	1.00491	0.995134	1.01045	1.00389	1.00628	0.997705	0.999231	0.992821	0.971057	0.989865	0.991985	0.991711	0.989227	0.995292	1.0163	1.00273	1.02563	1.00818	1.00559	1.02365	0.997761	0.993434	1.01366	1.03092	1.02641	1.02963	1.02333	1.00686	1.00995	1.01997	1.01726	0.990686
	1.28945	0.997669	0.980221	0.992838	0.996855	0.991667	0.984375	0.985041	0.998164	0.981157	0.991379	1.00542	0.996343	0.993704	0.988748	0.984382	0.999584	1.00406	1.00353	1.00094	1.01291	1.01663	0.985441	1.00155	0.98252	0.978015	0.974163	1.00708	0.994732	0.982735	0.984835	0.987735	0.998402	1.02197	1.00386	1.01258	1.00886	0.998544	1.00598	1.01386	1.01722	1.03253	1.02979	1.00897	1	1.00553	1.02307	1.0192	1.00336
	1.28935	0.964922	0.976703	0.9873	0.986835	0.976374	0.97642	0.98476	0.986943	0.985752	0.977927	0.982801	1.00574	0.993724	0.981265	0.985683	1.00661	1.00529	0.999015	1.00818	1.01927	1.02068	1.01859	0.989804	0.986909	0.97323	0.991325	1.0042	0.983871	0.991127	0.991497	0.990527	1.02029	1.01495	1.0079	1.01107	1.01201	1.01625	1.00517	0.98674	1.0059	1.03111	1.02805	1.0116	1.00985	0.998683	1.00069	1.03012	1.01141
	1.28925	0.977404	0.978723	0.993315	0.9744	0.980247	0.990622	0.98268	0.981868	0.99276	0.989274	0.994944	0.987733	1.00536	0.992271	0.986696	0.992503	0.995083	0.99603	1.00828	1.01538	1.00359	1.00399	0.993651	0.980812	0.979431	0.993596	1.00523	0.995134	0.995446	1.00086	0.997952	1.01982	1.0112	1.0146	1.00933	1.00443	1.02138	1.00627	1.01242	1.01701	1.015	1.01549	1.02124	1.00654	1	1.01324	1.01605	0.986143
	1.28915	0.992402	0.970383	0.977386	0.984881	0.995502	0.973121	0.982527	1.00139	0.989908	0.989263	0.997971	1.00483	0.991905	0.990234	0.991047	0.997876	1.00271	1	1.00338	1.00517	1.00215	1.02307	1.0016	0.983446	0.995676	0.982923	0.986164	0.994563	1.01338	0.996491	1.01578	1.00393	1.01371	1.02761	1.00071	1.00899	0.983015	1.00253	1.00111	1.01645	0.995863	1.02281	1.00305	1.00485	1.00381	1.02685	0.993113	1
	1.28904	0.987676	0.977804	0.985173	0.985027	0.977778	0.96746	0.976605	1.00922	0.998628	0.989289	1.00102	0.984721	1.0038	0.981068	0.991885	0.998271	1.00676	1.002	0.994678	1.01316	1.01737	1.00643	0.991214	0.981245	0.995019	0.990341	0.996115	0.989588	1.00093	0.992458	1.00083	1.0193	1.00977	1.00801	1.02853	1.0082	0.997173	1.00062	1.01427	1.01172	1.01128	1.01598	1.02088	1	1.01335	1.02114	1.01807	1.00646
	1.28894	0.968955	0.969479	0.979353	0.979343	0.963654	0.980924	0.999531	0.985294	0.989411	1	0.98934	1.01514	0.992869	0.978175	0.983532	1.00087	0.990323	1	1.01752	1.03044	0.995595	0.997632	0.984677	0.996949	0.98183	0.998446	0.996512	1.00051	0.995292	1.00182	1	1.02047	1.01031	1.01206	1.02221	1.01923	0.986515	1.00562	0.993478	1.01841	1.03481	1.01418	1.00813	1.00912	1.01839	1.01901	1.02368	0.993099
	1.28884	0.981201	0.988984	0.970767	0.982325	0.979341	0.979773	0.991713	0.987407	1.00235	1.00398	0.984826	0.993986	0.989071	0.998002	0.998141	0.992458	0.989848	0.988319	0.994595	1.00173	0.996369	0.99373	0.995154	0.975849	0.990695	0.98467	0.996514	0.995425	0.994307	1.00726	1.00649	1.00763	0.992977	1.00657	1.01313	1.01202	1.02032	0.995737	1.01222	1.01264	1.00283	1.00258	1.01415	1.0073	1.01889	1.03067	1.02386	0.992053
	1.28874	0.984694	0.968176	0.981164	0.986457	0.982257	0.979693	0.979563	0.985554	0.990706	1.00851	0.995387	1.00483	0.993355	0.991601	0.985253	1.00134	1.0066	1.00104	0.992997	1.00584	1.00662	0.999193	1.0049	0.98327	0.986709	0.983921	0.98794	1.00359	0.991408	1.00369	1.00868	1.00618	1.0011	1.02503	1.00998	1.01621	1	1	1.00401	1.01818	1.0142	1.00317	1.01083	0.977421	1.02556	1.01219	1.01995	0.995452
	1.28864	0.980237	0.972816	0.989336	0.976654	0.987873	0.988024	0.984281	0.97493	1.00745	0.98854	0.997971	1.00659	0.983916	0.987065	0.979991	0.996462	0.99425	0.993172	1.00768	1.01611	1.00741	1.02258	0.997539	0.973561	0.983083	0.981395	1.00513	0.988199	0.995681	0.998614	1.00964	1.00362	1.00566	1.02	0.998639	1.00704	1.00465	1.01042	1.01716	1.0143	1.0362	1.03171	0.994173	1.02102	0.993095	1.0262	1.01243	0.982838
	1.28853	0.985085	0.992558	0.993289	0.989296	0.9799	0.9665	0.978301	0.972558	1.00234	1.00404	0.997947	0.987594	1.0039	0.991988	0.996284	0.996449	0.999529	0.996259	1.00206	1.01511	1.01795	1.00322	0.997537	0.978328	0.977273	0.98002	0.992459	1.00412	0.997121	0.995385	0.994709	1.00156	1.00616	1.00617	1.00948	0.992302	1.00402	1	1.01378	1.0123	1.04551	1.02458	1.01261	0.994086	1.00614	1.00063	1.01306	1.00397
	1.28843	0.98405	0.98252	0.96993	0.993656	0.992155	0.97644	0.971347	0.986549	1.0042	0.994955	0.992296	1.00776	0.996663	0.973909	0.988738	0.994645	1.00048	1.00054	0.990726	1.01264	1.01058	1.00081	1.01569	0.983746	0.985906	0.981529	0.999487	1.0194	1.00838	0.992934	1.00672	1.01322	1.02105	0.995006	1.02491	1.01662	1.01812	1	0.990962	1.0298	1.0336	1.02645	1.01051	0.988159	1.00612	1.00309	1.0066	0.996013
	1.28833	0.965818	0.964207	0.980807	0.977108	0.973253	0.980231	0.987173	0.989504	1.00236	1.001	0.996375	1.00056	1.00623	0.994924	0.993387	0.992879	1.01058	0.998924	0.990812	1.00667	0.994544	0.992456	1.00588	0.974583	0.978914	0.990094	1.00861	0.996366	0.997539	0.997137	1.01031	1.00476	1.0099	1.00258	1.0192	0.992821	1.01062	1.00624	1.00712	1.03306	1.01405	1.02442	1.02258	0.995793	1.00304	1.02288	1.01432	1
	1.28823	0.98855	0.963557	0.99006	0.97417	0.981714	0.966537	0.984088	0.987987	0.989464	1.00202	0.977202	1.01163	0.989983	0.985478	0.999065	0.989644	0.98187	1.00053	1.00413	1.0006	1.0054	1.00754	1.00505	0.990446	0.976699	0.979036	0.989837	0.990186	0.985287	0.996221	1.01074	1.01115	1.00873	1.01683	1.0106	1.00965	0.997185	0.986924	0.990223	1.02519	1.03354	1.02486	1.00846	1.0006	1.01602	1.0171	1.01864	1.00534
	1.28813	0.989439	0.970992	0.971141	0.980367	0.97673	0.964943	0.97905	0.978511	0.988024	0.994271	1.00107	0.99888	0.993789	0.994362	0.995706	1.00366	1.00684	0.996196	0.998427	1.00856	1.00233	0.998308	0.99651	0.980583	0.980934	0.98814	0.99948	0.986229	1.00099	0.994769	1.00918	1.00863	1.02998	1.01761	1.0144	0.99699	0.998578	0.994959	1.00784	1.01808	1.02849	1.00437	1.01324	1	1.00749	1.01402	1.00709	1.00066
	1.28802	0.971878	0.956623	0.973451	0.982412	0.979356	0.971074	0.994146	0.982963	1.00203	0.978122	0.998347	1.00398	1.0051	0.988735	1.00192	0.993642	0.995592	0.99569	1.0243	1.0111	1.02208	1.00338	1.00086	0.975845	0.977778	0.98661	0.993757	0.997863	0.9852	0.991565	1.01747	1.01037	1.02206	1.01172	1.0072	0.995489	1	0.999361	0.993243	1.02662	1.04343	1.00254	1.01027	0.995187	1.01153	1.02343	1.02962	0.991459
	1.28792	0.976231	0.969821	0.976962	0.984221	0.996255	0.973023	0.980263	0.993348	1.00584	0.995049	0.991667	0.980969	0.98634	0.990731	1.00189	1.01459	1.0049	1.01141	0.99532	1.00804	0.98986	0.991468	0.977835	0.996797	0.982024	0.995662	0.999479	0.985067	0.993028	0.983992	1	1.00485	1.00119	1.02455	1.00578	1.01278	0.995683	0.995544	0.996631	1.01119	1.01987	1.02418	1.00671	1.0048	1.02211	1.01855	1.02409	0.972549
	1.28782	0.984334	0.986429	0.970747	0.988563	0.964378	0.98201	0.980867	0.981471	0.994328	0.984884	0.984163	0.998781	1.01108	0.981343	0.985707	1.00551	0.999506	0.994438	1	1.01096	1	1.00086	1.00174	0.96875	0.991864	0.989077	0.996812	0.995154	0.98993	0.986004	1.00184	1.007	1.00475	1.01199	1.01472	1.00756	1.00803	1.01108	1.00695	1.02027	1.02874	1.03555	1.01059	0.998141	1.01827	1.0163	1.0152	0.991963
	1.28772	0.98087	0.964379	0.976911	0.979229	0.979068	0.967365	0.967671	0.984677	1.00231	1.00358	0.989247	0.991905	1.00892	0.990597	0.981978	1.00752	1.01517	0.987466	0.982704	1.01935	1.01698	0.99396	0.984969	0.977039	0.970139	1.00331	0.984464	1.0032	0.985686	0.989428	1.01987	1	1.01796	1.02326	1.00945	1.01072	1.01081	0.984015	1.0108	1.02089	1.01358	1.01852	1.01716	1.00438	1.00692	1.0274	1.02206	0.989298
	1.28762	0.974061	0.96521	0.977668	0.979829	0.978448	0.972423	0.988156	0.975072	0.987172	1.00184	0.995037	0.995299	1.00203	0.971655	0.980798	0.993256	0.995935	1.00223	0.984202	1.01392	1.00965	0.999136	0.992964	0.99014	0.992568	0.991257	0.998413	0.986617	0.989889	1.00386	1.01228	0.999451	1.01322	1.01746	1.01168	1.01443	0.999278	1.00519	1.00578	1.00493	1.02886	1.03091	1.00126	1.00511	0.999356	1.01817	1.00534	0.998655
	1.28752	0.980234	0.974569	0.965748	0.970774	0.971976	0.972106	0.982263	0.988582	0.995311	0.983374	0.993498	1.00283	0.990896	1.00181	0.983167	0.997989	1.01008	0.99831	1.00216	1.0025	1.02445	0.984293	0.986819	0.982544	0.960837	0.98995	0.997902	0.990317	0.998483	0.994629	1	1.00222	0.998187	1.01548	1.00073	1.00306	0.994199	0.995513	1.00115	1.00875	1.02292	1.00868	0.991054	1.02441	1.02468	1.02512	1.00614	0.993089
	1.28741	0.973214	0.977437	0.998306	0.987271	0.971935	0.972464	0.98763	0.995595	1.00551	0.987374	0.993984	1.00717	1.00996	0.988757	0.98411	0.995378	0.996241	1.00523	0.993026	1.02215	1.01293	1	1.0151	0.984219	0.973773	0.99055	1.01221	1.00273	0.984879	0.99422	1.01125	1.00775	1.02598	1.01136	1.02653	1.00535	1.01311	1.01227	1.00573	1.01521	1.0171	1.0429	1.00191	1.01294	1.01187	1.02699	1.04568	0.991537
	1.28731	0.974038	0.979091	0.979916	0.982941	0.989474	0.982655	0.981263	0.982178	0.985	1.00198	0.986544	0.990511	0.993368	0.990667	0.984607	0.990436	1.00393	0.983173	1.00337	1.00194	0.986422	0.984127	0.988455	0.985997	0.976255	0.981697	0.992404	0.995114	0.984833	0.992614	1.0141	1.01342	1.01288	1.02397	1.01945	1.01479	0.998523	1.00262	0.99826	1.02553	1.02188	1.01681	1.01671	1.0093	1	1.02394	1.00419	0.981534
	1.28721	0.967257	0.963717	0.977985	0.985577	0.965799	0.968492	0.975661	0.989064	0.996646	0.998585	0.967994	0.989622	0.994661	1.00069	0.994086	1	1.0131	0.978391	1.01093	1.01115	1.01392	1.03086	0.970588	0.98263	0.987535	0.994353	0.986957	1.00168	1.00774	1.00149	1.0104	1.01898	1.0006	1.01949	1.00445	1.00235	1.00517	1.00643	1.00405	1.02404	1.01735	1.01279	1.00254	0.992862	1.01542	1.00732	1.02584	0.988389
	1.28711	0.983957	0.968834	0.983719	0.970874	0.968633	0.956134	0.985253	0.989525	0.976239	0.994868	0.969521	1.01353	0.993865	1.00069	0.991358	0.994839	0.992438	0.98915	1.01924	1.00893	0.994945	1.00355	1.00088	0.981818	0.972087	0.999427	0.997219	0.984127	1.0107	1.01013	1.00654	1.00878	1.00847	1.004	1.01263	1.00621	0.997008	0.996042	1.01173	1.01544	1.01215	1.03087	1.00904	0.994227	0.998686	1.01918	1.01191	0.979211
	1.28701	0.982975	0.982914	0.977682	0.982114	0.978836	0.981017	0.990057	0.991489	0.981289	1.01916	0.990107	0.996145	0.997692	0.984764	0.984365	1.00548	0.996259	0.994137	0.994949	1.01675	1.00182	0.983333	1.00815	0.978261	0.975207	0.975028	0.986887	0.980233	0.986479	0.989832	1.01327	1.00946	1.00429	1.01285	0.995562	0.995323	0.997739	1.01138	0.997066	1.02401	1.03051	1.01299	1.02085	1.00588	1.0134	1.004	1.01124	0.982967
	1.28691	0.97482	0.966697	0.983966	0.996743	0.981887	0.966165	0.976939	0.985159	0.987509	1.00227	1	0.980692	0.994548	0.988284	1.01972	0.998759	1.00525	0.983494	0.988771	1.0092	0.999068	1.00765	0.994382	0.984746	0.987351	0.990899	1.00959	0.995885	1.00055	1.00363	0.991296	1.01241	1.00608	1.002	1.02369	1.00625	0.984581	0.988357	0.997093	1.02781	1.02441	1.02757	1.01606	1.00516	1.00935	1.01905	1.01348	0.982869
	1.2868	0.961086	0.969697	0.981818	0.984628	0.977795	0.980769	0.983769	0.97463	0.999298	0.984837	0.983465	0.990887	0.992695	0.989877	0.980128	0.995584	1.01317	0.997738	1.02077	1	1.00862	1.01512	1.02425	0.975924	0.979211	1.00345	0.991056	0.99238	0.996696	0.983753	0.999503	1.01327	0.995184	1.00895	0.988872	1.00383	0.989622	0.992768	1.00235	1.01556	1.02494	1.02488	1.00654	1.02	1.01083	1.01671	1.01081	0.979137
	1.2867	0.968664	0.980392	0.960616	0.977068	0.974262	0.982184	0.973239	1.0043	0.995742	0.999231	1.0008	0.986543	0.988983	0.983521	1.00068	0.998706	0.998582	0.983721	0.996209	1.01288	0.994018	0.995872	0.994882	1	0.987943	0.97619	0.996652	0.987179	0.983597	1.01449	1.00256	1.00413	1.02132	1.01597	0.989054	1.01185	1.01128	1.0155	1.01141	1.01171	1.02927	1.02682	1.01184	1.00886	1.01333	1.01418	1.023	0.981022
	1.2866	0.961219	0.97698	0.989547	0.980913	0.971991	0.995356	0.977369	1.00144	0.985222	0.987111	0.988959	1.00593	0.992386	0.984103	0.997902	1.002	0.995021	0.99613	0.998487	1.02515	1.03024	1.00546	1.00638	0.98166	0.967939	0.976786	0.994328	0.989559	0.973525	0.990317	0.99949	1.00121	1.01118	1.01674	1.00409	0.999206	1.00983	0.98745	1.01305	1.02948	1.01983	1.02899	1.01517	1.00748	1.02707	1.01576	1.00371	0.975556
	1.2865	0.968254	0.975138	0.968213	0.973244	0.974438	0.970588	0.97516	0.99204	1.00582	1.00384	1.00159	1	1.00761	0.973056	0.99857	1.01009	1.0022	1.00318	1	1.00898	1.01218	1.00232	0.993205	0.961856	0.998397	0.998729	1.00609	1.00554	0.98877	0.985189	1.01427	1.0068	0.997284	1.02658	1.01104	1.00748	1.01368	1.00067	1.0018	1.01695	1.0324	1.02156	1.01268	0.996637	1.01837	1.01023	1.0221	0.976959
	1.2864	0.964513	0.976364	0.965606	0.975104	0.978074	0.969838	0.977857	0.992743	1.01072	0.995352	0.975724	0.989865	0.991646	0.984115	0.988104	0.987084	1.00298	1.00643	1.00693	1.01614	1.0022	0.969231	1.00958	0.996753	0.966942	0.996016	0.983627	0.992352	0.987889	1.00938	0.998947	0.992656	1.01529	1.00705	1.02638	0.998264	1.01743	1.02132	1.00597	1.01609	1.02684	1.02937	1.01136	0.997969	1.01912	1.00145	0.994792	0.973015
	1.2863	0.955674	0.963702	0.971503	0.976647	0.978462	0.98597	0.974946	0.97086	1.00215	0.996928	0.98332	0.992556	1.0108	0.9819	0.977731	1	1.00529	0.996681	0.993034	0.996432	1.02333	0.993983	0.996381	0.980089	0.9869	0.972555	0.983542	1.00194	0.99821	0.996122	1.01162	1.00187	0.998595	1.02276	1.00594	1.01173	1.00322	1.01032	0.998775	1.01644	0.987077	1	1.02222	0.99402	1.01125	1.03656	1.01361	0.986582
	1.28619	0.956102	0.959091	0.975758	0.979642	0.965831	0.977537	0.996398	0.984104	1.01029	0.986154	0.993538	0.987245	0.99159	0.992331	0.993585	0.998623	1.01063	0.992443	1.01298	1.01221	1.01691	0.984069	0.972671	0.986047	0.978424	0.9769	1.00628	0.981757	0.989937	1.01787	1.00109	1.00772	1.00862	1.01425	1.01916	1.02247	1.00697	1.00435	1	1.02457	1.01552	1.02626	0.997954	1.00136	1.01624	1.00707	1.01082	0.978477
	1.28609	0.978632	0.982079	0.978548	0.988691	0.954545	0.974871	0.976744	0.984241	0.990721	1.00541	0.996782	0.998289	0.982412	0.996916	0.989437	1.02004	0.999246	0.989185	0.999197	1.01697	1.00233	0.992528	1	0.967252	0.982473	0.965838	0.99927	0.989347	0.989082	1.00125	1.01352	1.00595	1.01651	1.01392	1.01467	1.02356	1.01553	1.00388	1.01143	1.0323	1.01535	1.03136	1.01151	1.00135	1.02488	1.01793	1.00225	0.98263
	1.28599	0.950751	0.957841	0.972549	0.987062	0.973371	0.979412	0.986197	0.986572	0.987189	1.0039	0.987903	1.01379	0.986555	0.98074	1.00072	1.00138	0.991729	1.00669	0.997579	0.993488	0.995294	1.01399	0.998711	0.978571	0.977473	0.983727	0.993907	0.982288	0.99731	0.986248	1.0098	1.02578	1.00143	1.0159	1.00087	1.01039	0.987215	0.989194	1.01383	1.00907	1.02204	1.02086	1	1.01102	1	1.0069	1.00903	0.97502
	1.28589	0.964315	0.960944	0.968109	0.979562	0.970706	0.966901	0.978523	0.988428	0.984786	0.996163	0.995964	0.995708	1.00344	0.990741	0.981322	1.0014	0.99542	0.991708	1.00571	1	0.997696	1.01658	1.02537	0.991463	0.996979	0.998346	0.990566	1.0031	0.979339	0.979082	0.994286	1.00774	1.00885	1.01989	1.00881	1.00382	1.0082	1	1.00301	1.02885	1.03546	1.01909	1.01883	0.99929	0.989422	1.0035	0.981928	0.979528
	1.28579	0.940632	0.954618	0.979026	0.981481	0.981795	0.978	0.982922	0.974642	0.989153	1.00227	0.988782	0.996581	1.00255	1.00389	0.990714	0.986951	1.00533	0.986134	0.991352	1.0208	1.00779	0.990123	0.992188	1.00607	0.979084	0.979458	1.00474	0.996075	0.983676	1.00139	1.01319	0.997104	1.01129	1.0081	1.01564	0.990494	0.98323	1.01846	1.01629	1.00833	1.01496	1.0207	0.999222	1.00381	1.01244	1.01231	1.01945	0.971321
	1.28569	0.94704	0.981773	0.968445	0.997874	0.968367	0.981646	0.985637	0.969394	0.982962	0.979016	0.992724	0.992255	0.984848	0.995253	0.982001	1	0.992278	1.00501	0.993666	1.00816	1.00998	0.992593	1.00524	0.978155	0.984032	0.969821	0.985748	0.990423	0.983471	1.00588	0.990553	1.00528	1	1.01786	1.01366	0.987379	0.995471	0.988439	0.989731	1.00363	1.01624	1.03655	0.998374	0.985004	0.995444	1.00075	1.0085	0.958111
	1.28558	0.95254	0.952381	0.977239	0.981263	0.97031	0.980589	0.960504	0.996944	0.969191	0.986582	0.998405	0.989646	0.994898	0.992996	1.01096	0.998594	0.99532	0.987785	1.01502	1.01993	1.01205	1.01453	0.985019	0.991657	0.98408	0.982645	1.00721	1.00244	1.00076	1.00074	1.00492	0.994431	1.00497	1.02952	1.02231	1	0.998104	1.01682	1.01288	1.02859	1.01467	1.01429	1.00735	1.00499	1.00081	0.99681	0.986777	0.957177
	1.28548	0.96105	0.953809	0.972043	0.96687	0.976339	0.966484	0.988048	0.988379	0.984587	1.00203	0.970436	1	0.982278	0.972414	0.994249	0.991718	1.00464	0.986755	0.993808	1.00538	1.02466	0.995249	0.996341	0.955882	0.982575	0.985342	0.977883	0.996756	1.01071	0.99115	0.997871	0.995126	1.00259	1.02786	1.01227	0.992723	1.01589	0.975424	1.01847	1.00316	1.02228	1.02688	1.00165	0.986611	1.01004	1.0212	0.995645	0.954435
	1.28538	0.957215	0.944862	0.964232	0.961066	0.962802	0.985933	0.968326	0.990857	0.990431	0.992063	0.977433	0.990315	0.97927	0.999242	0.991489	0.998605	1.01797	0.982293	1.00323	1.00271	1.01477	1.00599	0.991576	0.977974	0.978565	0.993605	1.01584	0.996013	0.984985	0.996321	0.99569	1.01591	1.02488	1.02153	0.996859	1.01737	1.0251	1.02311	1.01066	1.01912	1.02928	1.00755	1.00528	0.997398	1.00974	0.998211	0.983333	0.96303
	1.28528	0.972884	0.963805	0.971364	0.967922	0.978481	0.961189	0.982022	0.986346	0.9977	0.986067	0.980628	1.00775	0.988933	0.991994	1.00566	1.00686	1.0076	0.977686	1.00735	1.00639	1.03378	1.00355	0.990338	0.993464	0.983216	0.997703	0.994669	0.987578	0.982874	0.994131	1.00866	1.0033	1.01825	1.02073	1.00647	0.989071	1.00961	0.989748	1.0327	1.00765	1.00946	1.03189	1	0.986499	1.00925	1.01367	1.0087	0.965682
	1.28518	0.945643	0.954508	0.962179	0.978169	0.974506	0.971304	0.965953	0.991667	0.979353	0.989342	0.996693	0.987822	0.994669	0.998571	0.98849	0.997365	0.993407	1.00166	1.00081	1.00654	1.03143	0.982394	1.0134	0.968992	0.975763	0.994757	0.99848	0.990783	0.981426	0.992669	1.01144	1.00329	1.00359	1.02808	1.00758	1.00916	1.00108	1.00767	0.995715	1.018	1.01455	1.02596	1.00972	0.999063	1.01244	0.991811	0.970986	0.964215
	1.28508	0.945055	0.964058	0.964392	0.978322	0.974725	0.961856	0.980942	0.987771	1.00166	1.01035	0.998025	0.990175	0.996302	0.995088	1.00332	0.996114	0.990539	1.00083	0.989633	1.01318	1.00335	1.00358	0.995068	0.993274	0.991766	0.979073	0.997055	1.00076	0.985391	0.978355	1.00288	0.997553	1.01266	1.00905	0.996729	1.01359	1.00877	0.997082	1.02847	1.00723	1.00088	1.00774	0.99816	0.998082	1.00195	0.985902	1.02154	0.949341
	1.28498	0.949451	0.940133	0.963907	0.980245	0.973255	0.965473	0.985731	0.995	0.983957	0.97891	0.991134	1.00689	1.00286	0.991963	0.993816	1.00491	1	1.00397	1.00626	1.01189	1.00999	0.998807	0.99757	0.988751	0.977819	0.994784	0.990947	0.985075	0.989669	0.998594	1.0106	1.00735	0.986714	1.00978	1.00972	0.982123	0.997845	1.00097	1.01327	1.00972	1.03479	1	0.981966	0.991517	0.998124	1.00378	0.98794	0.952869
	1.28488	0.951236	0.958188	0.966865	0.974834	0.976819	0.987718	0.987515	0.988669	0.994618	1.00819	0.986224	0.989218	0.995225	0.991656	1.00595	0.995275	0.995264	0.998494	1.00922	1.02004	1.00334	0.99537	0.992831	0.986726	0.988879	0.975201	1.0014	0.997155	0.981371	0.985868	0.997253	0.981818	1.00792	1.02665	1.0167	0.991131	1.00757	1.01252	1.02207	1.00836	1.02091	1.02039	1.00093	0.998115	0.997151	0.996169	0.979675	0.931393
	1.28477	0.94664	0.951995	0.96574	0.971759	0.978382	0.970607	0.975133	0.967816	1.00055	0.994162	0.980841	0.977602	1.01667	1.00311	0.997705	0.988532	1.00261	0.992154	1.00948	1.00443	1.01074	0.983778	0.988221	0.986828	0.971844	0.980306	0.999301	0.996506	0.984506	0.98204	0.979765	1.0178	1.01265	1.00862	1	1.02486	1.00211	1	1.00086	1.022	1.00454	1.01906	1.00377	0.992687	0.999065	0.993256	0.997893	0.940987
	1.28467	0.938064	0.937255	0.974874	0.964002	0.962018	0.977564	0.98236	0.98313	0.997759	0.990649	0.997508	0.990956	0.987836	0.977233	0.993879	1.02479	1.00495	1.00408	0.983673	0.996705	1.01155	1.01143	1.00116	1.01537	0.98125	0.976917	0.994322	0.987671	0.985332	0.978777	1.005	1.0104	1.00081	1.02343	1.01579	1.00821	0.99697	1.00458	1.0017	1.01987	1.01186	1.03216	0.992488	0.99722	1.00367	1.00848	0.995897	0.945102
	1.28457	0.933637	0.937831	0.956281	0.965165	0.973166	0.969949	0.97488	1.00415	0.990508	0.994502	0.992366	0.991656	0.983638	0.988007	0.989451	1.01038	1.00707	0.989828	1.01442	1.00563	1.00099	0.989282	1.01362	0.994664	0.985752	1.00305	0.98637	1.00282	0.979798	1.00865	1.00822	1.0007	1.02617	0.991228	1.00771	1.01439	0.983575	1.01603	1.00251	1.01155	1.02955	1.02234	1	1.00291	1.0019	1.00759	0.957447	0.920168
	1.28447	0.938462	0.948218	0.966216	0.954626	0.959514	0.965031	0.962793	0.977727	0.983523	1.00372	0.999352	0.990938	0.988005	0.999434	1.00102	0.997022	0.996644	0.992	1.00629	1.01815	1.00735	0.996036	0.991389	0.989879	0.981116	0.986716	1.00724	0.98807	1.00514	0.987349	0.988814	1.02371	1.00519	1.01983	1.00826	1.03682	1.01307	1	0.990338	1.02404	1.02705	1.00497	1.01942	0.991271	1.00491	0.981818	0.974206	0.92
	1.28437	0.941377	0.930452	0.952586	0.959016	0.963739	0.966338	0.97726	0.990033	0.990368	0.982587	1.00782	0.990873	1.00196	0.983579	0.99695	0.996562	0.996139	1.008	1.00723	0.997839	1.00612	1.01276	0.969136	0.976654	0.970272	0.971528	1.00498	1.00423	0.994839	0.995046	1.01761	1.00797	1.01461	1.0118	1.01826	1.01801	1	1.00495	1.01404	1.00915	1.01576	1	1.00287	1.01182	0.99418	0.99325	0.967164	0.921794
	1.28427	0.939986	0.934256	0.95899	0.97092	0.954289	0.968944	0.973769	0.984979	0.99548	0.985452	0.976297	0.988435	1.00868	0.982981	0.993212	1.00301	0.9972	0.996921	1.00722	1.02361	1.01377	0.988582	1.00508	0.982424	0.98053	0.985235	0.987755	1.01004	0.99422	0.993707	1.01307	1.00393	0.995084	1.01202	1.03085	1.00809	0.994633	1.00081	1.00901	1.01655	1.03046	1.01039	1.00187	1.00198	0.992126	1	0.946841	0.923656
	1.28417	0.921788	0.941053	0.966256	0.975316	0.957871	0.956712	0.960703	0.980719	0.99729	0.997577	0.984674	0.984962	0.984117	0.982068	0.988842	0.995998	1.00113	0.99633	0.98603	1.00277	1.00252	0.999069	0.99711	0.992793	0.975392	0.98722	0.989993	0.987483	0.997462	1.0025	1.00792	0.998701	1.00754	1.00811	1	1.00427	0.995667	0.998418	0.999285	1.00966	1.03008	1.01355	1.00544	1.01065	1.00098	1.01116	0.966014	0.917293
	1.28407	0.923509	0.931834	0.973097	0.959827	0.972547	0.960177	0.972293	1.00106	0.989418	0.979082	0.99812	1.01336	1.00541	0.983745	1.0055	0.993805	1.00508	1.00862	0.991875	1.00895	1.0119	1.0046	0.979611	0.996441	0.978022	0.983364	0.997409	0.996592	0.989402	0.991422	1.00798	0.995979	1.00769	1.01806	1	1.00826	0.988304	0.97561	1.02703	1.02301	1.01317	1.00774	0.99481	1.00372	1.01746	0.972522	0.987138	0.920044
	1.28396	0.919605	0.943804	0.955805	0.967391	0.978094	0.978881	0.976289	0.988415	0.988403	0.997162	0.997567	1.00348	0.981379	0.989659	0.992794	1.00946	1.01492	1.00362	0.997639	1.01588	1.00512	1.00455	0.998145	0.982935	0.97178	0.996301	0.983292	0.992288	0.990178	0.98744	1.0102	0.995302	1.005	1.00683	1	0.999196	0.995157	1.00299	1.00757	1.02426	1.01547	1.01843	1.00492	0.9797	0.984361	0.992203	0.965848	0.883721
	1.28386	0.913805	0.916784	0.968729	0.968849	0.957672	0.975751	0.96514	0.976514	0.976227	0.989439	0.995338	0.9819	0.969251	0.983323	0.99458	0.988607	0.998283	0.983471	0.998247	1.01725	0.995008	1.0018	0.979982	0.989761	0.966596	0.98511	0.983432	0.995184	0.98926	1.00843	1.00812	0.988652	1.00145	1.02701	1.01535	1.01368	0.999201	0.992837	0.992642	1.00767	1.01433	1.02075	1.00474	0.980459	0.985828	1.01258	0.944792	0.889376
	1.28376	0.923626	0.913607	0.948701	0.974093	0.97335	0.957672	0.963567	0.995706	0.996255	0.989893	1.0123	0.992458	1.00969	0.974576	0.98939	0.998952	1.00115	0.993876	0.995189	0.996523	0.994037	1.01092	1	0.987147	0.987943	0.986881	1	0.999413	1.00297	1.00354	1.00859	0.99864	1.00745	1.0008	1.00673	0.99005	0.9784	1.00356	1.01051	1.0025	1.03524	1.01699	1.0139	1.00086	0.988485	0.988604	0.936148	0.87365
	1.28366	0.906362	0.945534	0.950306	0.966731	0.967213	0.966232	0.984641	0.981728	0.989367	0.994921	0.983081	0.996226	0.969846	0.984992	0.987193	0.996452	1.00754	1.00311	1.01158	1.01467	1	0.994475	1.00285	0.991349	0.969525	0.98997	1.00058	0.981428	0.994918	0.993115	1.00791	0.997367	1.01634	1.02387	1.00436	1.0086	0.991987	0.97018	0.997452	1.01765	1.01743	1.0211	0.999201	1.01274	0.988566	0.981802	0.911197	0.84492
	1.28356	0.912064	0.927737	0.942295	0.97406	0.954928	0.953654	0.984925	1.00169	0.986021	0.981577	1.006	1.01075	0.994475	0.985706	1.00828	1.00102	1.00581	0.998737	0.998181	1.01916	1.02439	0.987215	0.988582	0.988783	0.986242	0.991691	1.00459	0.996495	0.987229	0.986271	1.02129	1.00698	0.998567	0.999192	1.00787	1.00087	0.991006	1.00214	1.01789	1.0012	1.02545	1.01213	1.00315	0.967347	0.998273	0.980702	0.928166	0.847648
	1.28346	0.900073	0.939327	0.94407	0.951886	0.948485	0.97923	0.971461	0.996567	0.988531	0.993452	0.997549	0.988947	0.980149	0.997762	1.00157	0.996944	1.01375	0.981646	1.00943	0.998571	1.02307	1.00467	1.00388	0.976	0.990342	0.973262	1.00758	0.977594	0.99055	0.985554	0.992632	1.00311	1.0193	0.998394	0.999125	1	0.998268	1.00574	1.02531	1.00907	0.997955	1.01493	0.983346	0.968652	0.970075	0.978392	0.907847	0.808824
	1.28336	0.898488	0.934462	0.939497	0.959688	0.960558	0.957409	0.964627	0.978311	0.98657	0.983491	0.994431	0.983893	0.98535	0.989284	1.00885	1.00508	0.998252	0.996839	1.00559	1.01739	0.99387	0.998122	0.990186	0.979736	0.972953	0.986618	1.00952	0.995224	0.984556	1.00533	1.00883	1.00425	1.01722	1.00613	1.02766	0.998232	0.997434	1.01023	0.996186	1.00061	1.00134	0.997756	0.987573	0.978963	0.980064	0.975671	0.909991	0.818515
	1.28326	0.895544	0.930882	0.950173	0.955468	0.97113	0.952555	0.968397	0.97726	0.994325	0.990425	0.986742	0.974342	0.993523	1.00057	0.998928	1.00154	1	1.01013	0.989487	1	1.01166	1.00379	0.995103	0.98323	0.966936	0.9938	0.98085	1.00548	0.998883	1.00163	1.01118	1.00303	1.01279	1.00074	1.01493	1.0009	1.00261	1.00075	1.00999	1.00997	1.02106	1.02094	0.988397	0.966716	0.982429	0.98362	0.884854	0.789331
	1.28316	0.869818	0.932432	0.931724	0.947162	0.957302	0.991156	0.978563	0.983768	0.988796	0.998781	0.994917	1.00765	0.998018	0.974284	0.981661	0.991701	1.00534	0.989828	1.01315	0.994144	1.01169	1.01258	0.99311	0.976169	0.983704	0.988103	0.983415	0.995104	0.998853	0.996109	1.01592	0.997558	1.02447	1.01183	1.0033	0.977625	0.988556	0.997701	1.00339	1.02392	1.02135	1.01653	0.99573	0.975682	0.978261	0.976544	0.874246	0.796161
	1.28306	0.853532	0.914328	0.932785	0.966425	0.959925	0.959259	0.958142	0.9754	0.997194	1.0006	0.996835	0.98842	0.991356	0.989267	0.979858	0.992465	0.995786	0.990316	1.00503	1.00962	0.985009	0.992352	0.963947	0.989247	0.98234	0.990512	1.00305	1.00801	1.00172	1.00056	1.01094	1.01177	1	1.01423	1.00409	0.996619	0.983051	1.00228	1.01337	1.01496	1.01727	1.01985	1.00145	0.965618	0.973684	0.97803	0.876667	0.783036
	1.28295	0.845522	0.905716	0.933008	0.959839	0.966328	0.97967	0.974854	0.993027	0.976351	0.974561	1.0058	0.98696	0.984074	0.98444	0.994438	1.0055	0.991895	1.00476	0.986346	1.0015	0.993659	1.00786	0.995035	1.00363	0.98064	0.988651	1.00496	0.990074	0.997086	0.996599	1.00278	1.02936	1.00138	1.00461	0.999181	1.01106	0.994924	0.979561	1	1.01907	1.01282	1	0.986262	0.962417	0.971387	0.964805	0.852606	0.786087
	1.28285	0.84021	0.918898	0.936886	0.955034	0.96065	0.965146	0.965698	0.976093	0.982739	0.988351	1.00194	0.987603	1.00539	0.973621	0.997725	0.991717	1.00828	0.995896	1.00736	1.00384	0.995392	0.992157	0.989848	0.980681	0.965185	0.987723	1	0.986318	0.992303	0.997722	1.00449	1.00781	1.00703	1.00394	1.0399	0.996647	1.00168	0.992424	0.988348	0.998017	1.01738	0.999223	0.982495	0.972871	0.991654	0.951945	0.853678	0.772804
	1.28275	0.828897	0.905375	0.921144	0.936849	0.951105	0.968828	0.966841	0.975723	0.988149	0.996305	0.973819	0.99162	0.97651	0.984709	0.984314	1.00275	1.01894	1.00069	0.99866	1.02042	0.993409	1.01401	1.01118	1.00547	0.980153	0.9919	0.992634	0.998748	0.985172	0.997712	0.992693	1.00065	1.0219	1.0135	1.00849	1.01114	1.02222	1.00074	1.0122	0.995455	1.01381	1.01333	1	0.967504	0.97283	0.953066	0.830249	0.760033
	1.28265	0.805556	0.89283	0.905203	0.940581	0.96114	0.946574	0.974254	0.978861	0.992464	0.990548	0.97215	0.974895	0.985656	0.998129	0.999429	0.992192	0.990428	0.995074	1.01153	1.00158	0.993276	0.984894	1.01376	0.97361	0.982321	0.985498	0.991337	0.995564	1.0018	0.997064	1.00345	1.00066	1.00371	1	1.0026	1.01174	0.99746	0.994118	1.01691	1.01248	1.01761	1.00641	0.981749	0.968093	0.971229	0.926267	0.818765	0.764656
	1.28255	0.790193	0.885425	0.915888	0.930423	0.949807	0.962749	0.974269	0.99115	0.998279	0.980344	0.990891	0.97549	0.999301	0.986916	0.980271	0.997757	0.999356	0.991803	0.999312	1.0048	1.00098	0.984552	0.981992	0.961575	0.978091	0.979805	0.988147	0.981061	0.99523	0.988499	1.01631	1.0175	1.01098	1.01297	1.01339	1.01927	1.00603	0.996241	1.02063	1.00064	1.00999	0.998442	0.979483	0.973643	0.963509	0.923922	0.826547	0.751069
	1.28245	0.789855	0.863565	0.924597	0.9375	0.950392	0.957337	0.970274	0.979665	0.980256	0.999381	0.996101	0.981026	0.980218	0.978986	0.983457	1.00447	0.996803	0.989634	1.01232	0.996022	0.991245	0.989616	0.973656	1	0.991186	0.982827	0.9886	0.987813	0.995816	0.984091	0.994213	1.00799	0.997786	1.03317	1.02534	0.988182	1.00532	0.997683	1.01541	1.01819	1.02309	1.01354	0.983219	0.952267	0.968924	0.906349	0.80719	0.762669
	1.28235	0.769992	0.849758	0.934181	0.94835	0.954424	0.962	0.962126	0.966545	0.994696	0.983051	0.987541	0.987134	0.975309	0.977598	0.982788	0.990346	0.984848	0.982456	0.999306	1.01985	0.988911	1.00739	0.980371	0.983118	0.993426	1.00068	0.995413	0.988786	0.989666	0.986071	0.995899	1.0186	1.0015	1.00823	1.00992	1.01779	0.970951	1.00159	1.01783	0.996032	1.00434	0.998391	0.988654	0.954078	0.942857	0.929343	0.807432	0.741991
	1.28225	0.738035	0.851575	0.917819	0.937816	0.947475	0.96594	0.970735	0.993185	0.997561	0.994904	0.982838	0.997072	0.987413	0.992495	0.986736	1.00508	1.00649	1.00211	1.00891	1.0112	1.01695	1.02542	0.991257	0.982266	0.982801	0.983729	1.00132	0.988304	0.983476	0.997118	0.994216	1.00404	1.00824	1.01832	1.02557	1.02148	1.0181	1	1.00862	1.02441	1.01026	1.0195	0.986466	0.960692	0.943894	0.895659	0.808047	0.749787
	1.28215	0.731788	0.842331	0.907853	0.934082	0.93212	0.946214	0.962677	0.97306	0.981864	0.986599	0.978523	0.982183	0.981508	0.991762	0.99194	0.991986	0.976021	0.994322	0.988889	1.00818	1.002	1.00323	0.979348	0.987366	0.9751	0.997927	0.98929	0.986702	0.9919	0.981054	1.00178	1.00205	0.987988	1.01084	1.01769	1.00748	0.992613	0.988818	0.983607	1.01167	1.00969	0.994314	0.976209	0.98176	0.956452	0.881916	0.802385	0.752356
	1.28205	0.713928	0.816999	0.907149	0.913551	0.932292	0.949495	0.974932	0.989858	0.98713	0.988498	0.982979	0.989954	0.994207	0.991134	0.992987	0.995956	1	0.988612	0.998595	1.00082	0.991812	1.00433	0.994493	0.991984	0.987715	0.98614	0.987384	0.9833	0.996222	0.997577	1.0036	0.993878	1.00456	1.01511	1.00466	1.00943	1.00363	1.00822	1.01994	1.00418	1.02006	1.00084	0.974359	0.982498	0.932602	0.861362	0.782423	0.750221
	1.28195	0.705357	0.80525	0.916938	0.936585	0.951975	0.95572	0.963194	0.972128	0.97816	1.00418	0.987805	0.993939	0.990668	0.980491	0.985337	1.00059	0.994052	0.994338	0.997884	1	1.00206	1.00543	0.99442	0.99397	0.980424	0.982277	0.992768	0.99271	0.986155	0.990947	1.00361	1.00269	1.00539	1.00763	1.0073	1.01035	1.00552	1	0.987654	1.0162	1.00698	1.00085	0.98419	0.964968	0.920597	0.864692	0.802416	0.767568
	1.28185	0.680064	0.783073	0.881703	0.926591	0.92554	0.939158	0.951114	0.987189	0.982841	0.978417	0.978006	0.99	0.982955	0.994311	0.981258	1.00123	1.00343	0.976945	1.00422	1.00252	0.994888	0.995676	1.00787	0.971429	0.98751	0.988873	0.98724	0.987862	0.977806	0.993284	1.00668	1.00701	1.00078	1.01217	1.00848	0.981731	0.986928	0.989353	1.01474	1.01501	1.02623	1.00258	0.972865	0.956017	0.917609	0.857831	0.786325	0.777273
	1.28174	0.671277	0.780247	0.88959	0.921924	0.939711	0.950997	0.965072	0.975071	0.971528	0.980755	0.982169	0.979295	0.991754	0.978488	0.983199	0.989994	1.0021	0.988139	0.981106	0.994172	1.00207	1.0077	1.00343	0.982474	0.986278	0.993599	1.00414	0.982515	0.98811	1.00183	0.989157	1.00557	1.00155	0.97954	1.01927	1.00095	1.00942	0.990123	0.996285	1.01007	1.00477	0.994845	0.976151	0.954925	0.903386	0.829388	0.780446	0.774016
	1.28164	0.656098	0.770658	0.88118	0.924806	0.923375	0.944954	0.95594	0.975537	0.986192	0.966317	1	0.995238	0.982523	0.982024	0.994904	0.996109	1.02308	1.00228	0.98449	0.994083	1.02176	0.980728	1.00115	0.976554	0.968322	0.987152	0.994413	0.986226	0.983565	0.993268	0.998788	1.00981	1.00389	1.02151	1.01237	0.999039	1.01033	0.99916	1.00982	1.00999	0.993636	1.00338	0.976171	0.942905	0.891646	0.823191	0.778351	0.790698
	1.28154	0.664185	0.748663	0.85679	0.91208	0.937832	0.928052	0.964487	0.97352	0.979247	1.00729	0.980707	0.990638	0.979952	0.986591	1.01057	0.983968	1.0133	0.986698	0.993813	1.02016	0.990343	0.985946	0.970621	0.969979	0.975374	0.978293	0.984935	1.01593	0.980263	0.994465	1.01121	1.00635	0.999212	1.02111	1.00191	0.991185	1.0095	0.985	1.00305	0.996372	1.00804	1.00622	0.963485	0.945854	0.863905	0.815319	0.758741	0.791592
	1.28144	0.658744	0.737925	0.850847	0.90768	0.945022	0.924795	0.975169	0.9735	0.982677	0.98273	0.993215	0.988062	0.976764	0.979305	0.982713	0.991408	0.995323	0.98888	0.998406	1.00098	0.987254	1.00227	0.996516	0.979701	0.964696	0.971914	1.00367	0.989474	1.00071	0.99115	1.01086	0.976503	1.0175	1.02892	1.02444	1.01268	0.991517	0.993339	1.00227	0.994207	0.998397	0.990376	0.961125	0.955707	0.852107	0.785592	0.758497	0.790528
	1.28134	0.666959	0.728417	0.826453	0.911093	0.921155	0.932593	0.938937	0.966898	0.992851	0.996624	1	0.986201	0.980479	0.980872	0.984032	1.00066	1.0069	0.996639	0.981667	1.01147	1.00769	1.01333	0.99635	0.967427	0.984127	0.980228	0.994902	0.999209	0.982681	0.99006	0.989053	1.00424	0.996094	1.00786	1.01164	1.00492	1.01261	0.974167	1.01453	0.999286	1.00162	0.980702	0.975692	0.939811	0.849315	0.773356	0.770186	0.804878
	1.28124	0.672493	0.698096	0.824725	0.906838	0.90652	0.946387	0.97586	0.973997	0.979374	0.987879	0.991205	1.0076	0.9963	0.988272	0.96955	1.0041	1.00079	0.987002	0.993966	1.02632	0.985469	1.00128	1.00132	0.993166	0.978947	0.979881	1.01202	0.988226	0.988453	0.997151	1.00069	1.01778	1.01355	1.00969	0.987701	1.00686	1.00965	0.97817	0.996897	1.00582	1.00494	0.985803	0.938758	0.928696	0.834335	0.761946	0.775435	0.813688
	1.28114	0.676083	0.712052	0.806202	0.905336	0.9251	0.921645	0.94413	0.975887	0.964519	0.983278	0.986135	0.978485	0.98482	0.988854	0.981159	0.992372	1.00161	0.997307	0.996451	1.01422	0.996124	1.00626	0.985861	0.984561	1.01113	0.993994	1.00073	1.00536	1.00153	1.00144	0.996403	0.98787	0.994262	0.992939	1.01624	1.00097	0.964491	0.976471	0.987111	0.999272	1.00655	0.971197	0.945332	0.92415	0.824348	0.766462	0.772106	0.829808
	1.28104	0.680872	0.686898	0.780969	0.899731	0.92428	0.9251	0.955979	0.951219	0.979607	0.983146	0.984784	0.990512	1.00489	0.990646	1.00151	0.995529	1.01997	0.980556	0.997258	1.01987	1.00788	1.01459	1.01994	0.968711	0.983431	1.00469	1.01043	1	0.993088	1.00075	1.00377	1.01811	1.01049	1.00926	0.993256	1.00392	0.990458	0.99154	0.999222	0.999257	0.995912	0.97693	0.957877	0.898084	0.812337	0.750883	0.778293	0.839216
	1.28094	0.687831	0.678899	0.77952	0.883333	0.913189	0.929853	0.934191	0.960843	0.974074	0.990618	0.990894	0.979323	0.99108	0.970009	0.986739	0.990588	1.02122	0.984283	1.01782	1.00328	1.02469	0.987772	0.998489	0.988064	0.975967	0.978778	0.991413	0.996873	0.978212	0.985412	1.02415	1.01477	0.99446	1.02761	1.0071	0.996075	1.00382	0.984823	0.997683	0.986833	0.996713	0.964991	0.940386	0.902655	0.791161	0.746667	0.787793	0.838432
	1.28084	0.70684	0.678909	0.762583	0.875989	0.906701	0.898849	0.939613	0.93652	0.972707	0.970149	0.989848	0.969188	0.973938	0.968021	0.992683	0.99348	0.989758	1.01299	0.987884	1.024	0.995856	0.989826	0.992151	0.989071	0.983407	0.987713	0.996519	1	0.996169	0.991994	0.994273	1.01787	0.99816	1.02047	1.00213	1.01134	1.0029	0.962901	1.00229	0.986172	0.994262	0.974775	0.955932	0.894138	0.799824	0.747331	0.792208	0.853167
	1.28074	0.697674	0.689159	0.740451	0.845807	0.911867	0.909479	0.939592	0.966184	0.973101	0.981422	1.00352	0.969501	0.97597	0.966956	1.00085	0.978477	0.990494	0.98997	1.00301	1.00595	1.00143	0.992548	0.9648	0.965616	0.991677	0.963928	1.00373	0.985332	1.00634	1.01316	0.996416	0.995157	1.01966	1.02457	1.02778	0.99235	0.986234	0.9974	0.989946	0.989059	0.999184	0.964801	0.925373	0.89441	0.780553	0.753199	0.797373	0.87234
	1.28064	0.708874	0.659115	0.758551	0.862326	0.888112	0.921861	0.952381	0.972089	0.978244	0.98588	0.986535	0.992606	0.984252	0.990393	0.994876	0.98134	1.0098	0.994939	0.996907	0.978495	1.01429	0.983728	0.998387	0.989855	0.984431	0.984802	0.988899	1.02466	0.983593	0.988183	0.995711	1.02391	1.00739	1.00426	1.01871	0.988611	0.965726	0.981897	1.00154	1.0044	0.99181	0.962667	0.924497	0.871053	0.776985	0.723835	0.809346	0.866273
	1.28054	0.723333	0.673604	0.73029	0.817664	0.890288	0.912926	0.95071	0.96246	0.966062	0.979275	0.990715	0.982025	0.976127	0.979825	1.00084	0.994078	0.995069	1.00631	1.01361	1.01138	1.01182	0.954955	0.987362	0.977591	0.950413	0.978852	0.990263	0.986226	0.98295	0.990491	0.995406	1.00256	1.0235	1.01742	1.01037	1.00719	0.985475	0.977518	0.984933	1.00593	1.00666	0.975297	0.923141	0.869413	0.755459	0.756926	0.81279	0.88724
	1.28044	0.75638	0.673493	0.702906	0.837949	0.895564	0.909348	0.950435	0.950833	0.955649	0.95975	1.00191	0.964462	0.989767	0.978495	0.992537	1	0.992149	0.989236	0.994675	0.998726	1.00152	0.985782	0.980861	0.978873	0.947368	0.989701	0.997988	0.99618	0.996377	1.00938	0.989508	0.997317	0.97822	1.01542	0.997725	1.0146	0.998814	0.984405	0.983264	0.989772	0.985482	0.956364	0.923867	0.845674	0.742831	0.760181	0.832381	0.888211
	1.28034	0.746251	0.680508	0.694233	0.805584	0.888023	0.912055	0.95082	0.953793	0.968366	0.971296	0.980806	0.976289	0.988201	0.986213	0.9967	0.985318	1.00585	0.988298	0.988108	0.989822	0.989394	0.975078	0.996758	0.970255	0.972422	1.00104	0.997018	1.00798	0.981668	0.988705	1.01783	1.01838	1.00484	1.00627	1.00329	0.991851	0.995365	0.980769	0.980926	0.993426	0.97227	0.977695	0.913793	0.832891	0.75986	0.765555	0.85563	0.899202
	1.28024	0.782713	0.691402	0.685528	0.792059	0.888554	0.91129	0.931455	0.93705	0.966816	0.98673	0.981427	0.982049	0.985656	0.985493	0.971878	0.995895	1.00189	0.988421	1.00433	0.981889	0.989181	0.978056	0.978862	0.955966	0.996315	0.979232	0.989889	0.992972	0.985061	0.989918	0.986099	1.00467	0.997996	0.994606	1.01577	0.994206	0.96789	1.00919	1.00684	1.01276	0.978605	0.945076	0.891916	0.819716	0.755396	0.795475	0.869442	0.916503
	1.28014	0.764916	0.693128	0.677348	0.78342	0.874498	0.90982	0.945076	0.95907	0.964991	0.962335	0.975296	0.981838	0.98722	0.971762	0.981928	0.995791	0.990403	1.0127	0.982105	0.991003	0.989198	1	0.975329	0.96361	0.96088	0.969072	0.986935	1.00801	0.983562	0.97861	0.996473	0.985741	0.991543	1.01716	1	0.991879	0.99073	0.984818	1.00395	0.979885	0.965174	0.927579	0.897153	0.801282	0.746935	0.793607	0.856061	0.914767
	1.28004	0.794258	0.703971	0.683333	0.765869	0.85561	0.901296	0.924228	0.947754	0.966486	0.987366	0.976744	1	1.00318	0.966019	0.989455	0.984772	0.975775	0.984647	0.994893	0.992537	0.989362	0.996835	1.01161	0.994135	0.995037	0.977642	0.997012	0.997009	0.99634	0.997338	0.997338	1.01478	1.00992	1.00239	0.997642	1.00364	0.989523	0.982724	0.983479	0.976631	0.967983	0.940314	0.861004	0.802271	0.748649	0.782842	0.889616	0.909266
	1.27994	0.80355	0.723926	0.668177	0.76129	0.857438	0.904137	0.929389	0.949763	0.958866	0.962025	0.985567	1.00656	0.981818	0.977539	0.990072	0.991312	0.990927	0.982383	1.01458	0.995062	1.00462	0.993569	0.963394	0.977811	0.984829	0.997934	0.981873	0.987793	0.977211	0.994681	1.00899	0.997972	1.01387	0.991261	0.998736	1.0101	0.969697	0.963636	0.980151	0.980373	0.955093	0.943221	0.86076	0.778455	0.723853	0.820183	0.900574	0.944609
	1.27984	0.833333	0.722679	0.664391	0.728061	0.831461	0.888446	0.922636	0.927239	0.979265	0.973503	0.994753	0.982571	0.979348	0.990177	0.988117	0.990214	0.98873	0.986444	0.997899	1.00503	1.00452	0.993651	0.998333	0.967017	0.96798	0.9862	0.984741	0.984894	0.986916	1.00179	0.994667	0.997947	1.00581	1.01901	0.992126	0.986487	0.976071	0.996917	0.98244	0.982193	0.95508	0.934524	0.857143	0.758134	0.753479	0.816523	0.917556	0.960082
	1.27973	0.832	0.737986	0.673469	0.710221	0.831276	0.895267	0.913989	0.95057	0.951852	0.987242	0.989744	0.992188	0.961864	0.981169	0.98268	1.00628	1.00936	1.00106	1.00653	1.01279	1.0163	0.979814	0.980392	0.977778	0.991272	0.993603	0.990722	0.972919	1	1.00181	0.99634	1.00411	1.00351	1.02411	0.997271	0.990424	0.965952	0.973739	0.995296	0.982505	0.967942	0.925708	0.854023	0.760417	0.768085	0.825688	0.91358	0.934343
	1.27963	0.866123	0.736142	0.678534	0.693483	0.816701	0.875498	0.917387	0.938389	0.968401	0.968597	0.989627	0.972315	0.962647	0.992118	0.964865	0.985676	0.986584	0.978022	1	1.01571	1.01233	0.989231	0.976936	0.977811	0.995068	0.991453	0.990731	0.982793	1.00383	0.981851	1.0028	1.01795	1.01188	1.01305	0.983584	0.993084	1	0.967885	0.975394	0.969216	0.951194	0.901073	0.814059	0.741359	0.765306	0.846154	0.921053	0.949314
	1.27953	0.842342	0.784768	0.670352	0.691626	0.7846	0.874633	0.89779	0.942593	0.959016	0.967773	0.980691	0.986784	0.995595	0.980119	0.974084	0.97961	0.996917	1.00335	1.01647	0.997416	0.99247	0.983129	0.9712	0.965616	0.972637	0.98944	0.990854	0.989837	1.00095	0.977355	0.989908	0.998964	1.00815	1.01816	1.00967	0.991655	1.00137	0.976663	0.964583	0.972616	0.970085	0.915877	0.816027	0.747017	0.776362	0.862559	0.929078	0.91886
	1.27943	0.858268	0.773649	0.672048	0.698925	0.782852	0.873466	0.932719	0.931284	0.963458	0.95351	0.972561	0.973799	0.952128	0.977137	0.964093	1.00806	0.995906	0.989071	0.992333	1.01423	1.00772	0.990476	0.98722	0.975069	0.970096	0.988457	0.998968	0.964431	0.978032	0.993566	0.984531	1.00529	0.996487	1.0155	1.00549	0.995851	0.994521	0.975816	0.975108	0.950704	0.958659	0.898601	0.801578	0.771011	0.778539	0.860849	0.940678	0.940023
	1.27933	0.871116	0.789779	0.697505	0.677788	0.761404	0.850719	0.892606	0.917034	0.952586	0.967773	0.984725	0.971154	0.992473	0.976654	0.980462	1.00358	1.00728	0.995546	0.992265	0.98961	0.995363	0.973437	0.972973	0.985755	0.961722	1.00532	0.991718	0.978125	0.994225	1	1.0047	1.00525	0.990588	1.01167	1.02687	0.995816	0.969822	0.96988	0.980877	0.952681	0.947674	0.907522	0.810997	0.740651	0.77867	0.862227	0.96005	0.945612
	1.27923	0.90205	0.813848	0.706736	0.674484	0.749787	0.859215	0.907873	0.925424	0.953985	0.963685	0.962392	0.959794	0.985597	0.960114	0.977072	0.988546	0.985772	0.993457	0.994577	1.00255	1.00151	1	0.969793	0.985632	0.94813	0.976289	0.988718	0.988775	0.982709	1.00365	1.013	0.995803	1.02138	1.00904	1.00138	0.969986	1	0.961859	0.990077	0.959077	0.947307	0.901356	0.78186	0.743023	0.792148	0.892086	0.960859	0.962868
	1.27913	0.911765	0.816118	0.715481	0.665125	0.73993	0.823331	0.894309	0.926628	0.96368	0.966471	0.964453	0.969605	0.982983	0.991453	0.976399	0.999118	0.985901	0.98587	0.992333	0.991094	0.980684	0.979845	0.991857	0.971306	0.973072	0.98218	0.995872	0.984584	0.989433	0.989815	1.01394	0.994742	1.0095	1.01167	0.994558	0.980796	0.989056	1	0.956188	0.943038	0.946996	0.884131	0.772567	0.74012	0.816351	0.882567	0.945477	0.949416
	1.27903	0.913143	0.820023	0.737538	0.669492	0.713404	0.837209	0.88161	0.92991	0.943279	0.968344	0.959292	0.971144	0.966475	0.990689	0.97215	0.990325	0.990872	0.994606	0.987248	0.996169	0.992515	0.980153	1.01792	0.986804	0.969697	0.975738	0.981366	0.977459	0.979866	0.985335	1.01581	1.01574	0.996466	0.975827	0.993169	0.9875	0.987603	0.963592	0.967706	0.964059	0.918981	0.861461	0.757683	0.738386	0.823317	0.903614	0.963795	0.966975
	1.27893	0.899093	0.83956	0.741562	0.681267	0.687555	0.830189	0.88749	0.921663	0.939033	0.959877	0.958333	0.957952	0.965961	0.959448	0.985281	0.992221	0.971372	0.992545	0.998955	1.01656	0.994048	1.00461	0.987421	0.988555	0.982079	0.986287	1.00103	0.989848	0.999043	0.989101	0.995366	1	0.993064	0.993663	0.985054	1	0.98248	0.997543	0.961454	0.952033	0.927083	0.862283	0.753864	0.763321	0.827381	0.927007	0.950119	0.969895
	1.27883	0.9	0.859307	0.755082	0.679739	0.686151	0.788576	0.905976	0.934452	0.923929	0.947207	0.970321	0.975741	0.964696	0.97421	0.98495	0.981435	1.00199	0.993737	1.02331	1.01149	0.996992	1.00619	0.99362	0.978663	0.963572	0.976507	0.98773	0.97739	0.997101	0.991728	0.978142	1.00733	1.00581	0.998731	0.98248	0.980769	0.970509	0.976998	0.965784	0.944798	0.890553	0.837638	0.763938	0.775434	0.846902	0.929975	0.981273	0.974734
	1.27873	0.909378	0.872881	0.770048	0.673993	0.68007	0.783402	0.861176	0.897788	0.931084	0.944822	0.957634	0.969905	0.965342	0.956656	0.985202	0.977977	0.983559	0.97855	1.00415	0.995	1.00297	0.990854	0.984848	0.973937	0.968605	0.975635	0.967099	0.979695	0.981956	1.02241	1.0149	0.985552	0.989888	0.987437	1.00411	0.971272	0.978638	0.958234	0.961197	0.922997	0.916084	0.828221	0.746462	0.7866	0.86578	0.938596	0.981935	0.971698
	1.27863	0.929679	0.881512	0.798122	0.695814	0.671465	0.766585	0.887684	0.896065	0.915789	0.954273	0.974279	0.970223	0.956557	0.965411	0.984281	0.99606	0.975904	1.01318	1.0114	0.996255	1.00444	0.997063	0.995363	0.987671	0.984901	0.980847	0.984143	1.00504	0.971725	1.0056	1.0066	1.00205	0.990981	0.997561	0.994751	0.981004	0.983871	0.967971	0.959866	0.933747	0.892078	0.83871	0.747664	0.766265	0.86839	0.949431	1	0.973262
	1.27853	0.941837	0.873883	0.793135	0.695572	0.673111	0.744873	0.840179	0.909774	0.922401	0.942728	0.966485	0.970468	0.981615	0.966617	0.982001	1.00301	0.996429	1	0.99897	1.00126	1.03609	0.991085	0.995327	0.995781	0.98014	0.986974	0.996051	0.987915	0.965291	0.992537	0.995301	1	1.01988	0.984108	1.00392	0.968	0.950713	0.960479	0.941441	0.95284	0.885151	0.832487	0.752086	0.794686	0.854438	0.942211	0.984211	0.955041
	1.27843	0.929878	0.884766	0.80543	0.70676	0.657439	0.724359	0.8273	0.901355	0.923636	0.942179	0.962264	0.961125	0.977397	0.967283	0.983573	0.997135	0.978705	0.992565	1.00595	0.993873	1.00584	1.01048	0.984448	0.9681	0.982353	0.995935	0.992157	0.969961	0.991743	0.991855	1.00093	1.00212	0.996458	1.00123	0.99473	0.97406	0.988447	0.945143	0.961369	0.932203	0.873843	0.803504	0.741706	0.82266	0.896088	0.956688	1.01339	0.969529
	1.27833	0.931864	0.879961	0.830824	0.720303	0.666384	0.705452	0.830986	0.890853	0.914511	0.951515	0.944932	0.971304	0.966746	0.978464	0.978983	0.988404	0.973236	0.986231	0.998127	1.00119	1.00424	1.00733	0.993837	0.987603	0.967328	0.977956	0.98607	1.00489	0.995442	0.986619	0.976037	0.994726	1	0.987547	0.965834	0.964567	0.966912	0.946953	0.964052	0.920886	0.856813	0.775	0.763855	0.80148	0.887136	0.955527	0.968421	0.968232
	1.27823	0.968658	0.895437	0.824232	0.744091	0.653693	0.699588	0.793349	0.876766	0.918681	0.943411	0.948655	0.955959	0.969167	0.957523	0.983039	0.980537	0.983412	0.998328	0.989352	1.00334	0.995879	1.00287	1.00303	0.967347	0.973594	0.971624	0.990196	0.991296	0.975588	0.994671	0.980681	1.00427	1.01066	0.997455	0.990515	0.969496	0.969697	0.945856	0.957402	0.902564	0.838636	0.766378	0.751781	0.829733	0.918591	0.970551	0.979167	0.969739
	1.27813	0.930123	0.892014	0.828283	0.756019	0.652341	0.674803	0.779332	0.871695	0.919609	0.928344	0.955665	0.960549	0.983264	0.967105	0.974881	0.978794	0.984686	0.99115	0.99584	0.998962	0.99354	0.990182	0.986938	0.962629	0.967416	0.977654	0.988561	0.977927	0.978281	0.988936	0.991826	0.991597	0.986175	0.985112	0.983696	0.98248	0.953317	0.952017	0.928425	0.901902	0.823661	0.776233	0.775633	0.831475	0.920988	0.9677	0.997452	0.962759
	1.27803	0.949309	0.899091	0.854377	0.763242	0.663602	0.659954	0.760061	0.858124	0.888643	0.920188	0.961789	0.961505	0.96106	0.953962	0.972357	0.983255	0.983658	1.00416	0.973039	1.01111	0.982587	0.986413	0.983075	0.994845	0.973941	0.972452	0.976614	0.962998	0.991743	0.987931	0.999085	0.996878	1.00459	0.998758	0.988064	0.977151	0.957747	0.934066	0.93	0.878352	0.812081	0.755975	0.765125	0.868256	0.908978	0.977836	0.976532	0.98042
	1.27793	0.942571	0.921267	0.868755	0.765907	0.681302	0.658133	0.741202	0.85474	0.892622	0.925581	0.953279	0.948925	0.951342	0.966514	0.973944	0.981392	0.98913	0.990909	0.997531	0.99218	0.992629	0.97992	0.995833	0.96076	1	0.989767	0.993415	0.987121	0.983607	0.978223	0.98018	0.992806	0.977654	0.98301	1	0.982409	0.954604	0.950617	0.916749	0.870781	0.770992	0.761787	0.774764	0.854839	0.909898	0.963351	0.998638	0.986784
	1.27783	0.952252	0.922587	0.887705	0.777864	0.69121	0.648286	0.719858	0.850549	0.896724	0.921053	0.952998	0.965456	0.958264	0.965491	0.979107	1.0086	0.994561	0.989336	0.991903	1.00295	1.00722	0.981865	0.990476	0.971393	0.966814	0.971001	0.973564	0.977837	0.985676	0.990334	0.980054	0.989775	0.985572	0.997525	0.971466	0.995951	0.952632	0.924743	0.908382	0.868321	0.776087	0.744104	0.781714	0.869619	0.914033	0.99187	0.989071	0.97114
	1.27773	0.943985	0.925183	0.875318	0.798085	0.692668	0.641825	0.711852	0.825774	0.880171	0.912614	0.936842	0.959016	0.971843	0.976923	0.976242	0.971831	0.987981	0.984464	0.989353	1.01207	0.99642	0.98094	0.993307	0.992537	0.968375	0.975845	0.986351	0.987478	0.995528	0.991197	1.00093	0.985356	0.985075	0.98132	0.962629	0.95953	0.94473	0.920582	0.890208	0.831892	0.76516	0.742197	0.799324	0.88191	0.935115	0.985034	1.0014	0.966176
	1.27763	0.958373	0.917516	0.876793	0.829564	0.727484	0.656751	0.683225	0.80361	0.879747	0.91416	0.925781	0.93374	0.965517	0.951538	0.982405	0.983803	0.991122	0.982899	1.00253	0.981225	0.982122	0.985	0.981555	0.972554	0.967513	0.982585	0.992876	0.984545	0.981002	0.991646	0.991251	0.977459	1.00116	0.99375	0.992136	0.965385	0.945912	0.921806	0.904665	0.835616	0.759955	0.741973	0.80308	0.862697	0.965952	0.981358	1.01816	0.95549
	1.27753	0.962209	0.940212	0.891546	0.837993	0.735156	0.64161	0.671522	0.773913	0.87758	0.897341	0.931872	0.936387	0.969773	0.960876	0.964084	0.972803	0.971542	0.995826	1.01171	1.00506	0.991422	0.992528	0.989704	0.973318	0.973581	0.989646	0.981083	0.991848	0.983775	0.984215	1.00338	1.00098	0.98307	0.983689	0.983029	0.971466	0.9375	0.92436	0.896226	0.808636	0.732379	0.740139	0.811902	0.904707	0.939716	0.978233	1.01788	0.980798
	1.27743	0.96333	0.937316	0.89375	0.839831	0.734485	0.642195	0.647144	0.750185	0.864613	0.908953	0.913492	0.955095	0.964725	0.963719	0.958509	0.989316	0.979167	0.981164	0.981974	1	0.977941	0.998728	0.97903	0.980324	0.980751	0.981908	0.987256	0.960208	0.970613	0.995219	0.980263	0.993446	0.990022	0.979115	0.965251	0.951697	0.925736	0.924122	0.882604	0.796146	0.744054	0.758413	0.832604	0.907159	0.950857	0.991347	0.993261	0.96259
	1.27733	0.955268	0.951437	0.898014	0.855085	0.75974	0.654559	0.638095	0.745914	0.845878	0.89577	0.914996	0.939738	0.933014	0.948927	0.986815	0.972202	0.986043	0.968103	0.988656	0.980392	1.01358	1.01567	0.983673	0.963049	0.978558	0.972603	0.986733	0.973266	0.970827	0.973913	0.9837	0.969147	0.991247	0.9807	0.968031	0.952818	0.919897	0.90991	0.863636	0.76631	0.712594	0.768765	0.84738	0.911602	0.944882	0.979665	0.971429	0.974684
	1.27723	0.938431	0.929664	0.896964	0.864392	0.78365	0.6768	0.650566	0.71644	0.850669	0.889901	0.908197	0.939502	0.951987	0.948276	0.960279	0.969338	0.983793	0.971996	0.993805	0.990526	0.97619	0.993532	0.971812	0.952997	0.979532	0.978188	0.995098	0.986722	0.986279	0.989788	0.989439	0.977022	0.97908	0.965792	0.973783	0.943717	0.936592	0.885778	0.843175	0.767018	0.731654	0.772616	0.836944	0.908681	0.962838	1.00589	0.987578	0.986111
	1.27713	0.952859	0.947047	0.926175	0.865591	0.766332	0.687603	0.6375	0.713178	0.824548	0.882168	0.894089	0.929338	0.941277	0.953435	0.959155	0.973907	0.970968	1.00268	1.00353	0.998938	0.985951	0.978864	0.982192	0.973558	0.966403	0.976251	0.989256	0.970732	0.972093	0.968845	1.00729	0.986264	0.971888	0.99096	0.963768	0.940806	0.912533	0.891068	0.82808	0.730522	0.715054	0.786905	0.876443	0.918203	0.961894	1.02524	1.00373	0.979424
	1.27703	0.961225	0.938776	0.914736	0.882613	0.786746	0.684909	0.648542	0.684087	0.78403	0.863919	0.892857	0.941123	0.942907	0.946553	0.969286	0.991459	0.975826	0.971915	0.973067	0.971934	0.971033	1	0.99455	0.972586	0.974435	0.967473	0.986145	0.977474	0.971321	0.970631	0.994644	0.986772	0.986125	0.963323	0.933025	0.937576	0.915935	0.871658	0.812377	0.731773	0.705088	0.797885	0.868391	0.905594	0.972586	0.978698	0.992718	1
	1.27693	0.951546	0.957469	0.919444	0.883303	0.806314	0.715711	0.640823	0.674547	0.772939	0.867043	0.901099	0.936803	0.934612	0.956765	0.958914	0.974341	0.985148	0.96988	1.00176	0.979937	0.983397	0.985235	0.983516	0.972455	0.965829	0.974425	0.979184	0.973554	0.975498	0.977455	0.997741	1.01572	0.993994	0.972284	0.960694	0.942118	0.92176	0.884406	0.791709	0.702087	0.716115	0.811254	0.887218	0.93699	0.971257	0.983193	0.991515	0.968952
	1.27683	0.968815	0.949206	0.932187	0.921409	0.82906	0.727425	0.65214	0.668293	0.76053	0.861526	0.887924	0.902033	0.928889	0.951797	0.950699	0.955	0.969773	0.982684	0.982348	1.0213	0.996139	0.987871	0.975035	0.954272	0.966498	0.972318	0.968067	0.97037	0.962567	0.967696	0.980273	0.969309	0.99502	0.967249	0.941781	0.912736	0.894103	0.862661	0.771717	0.71137	0.736313	0.826555	0.88634	0.913093	0.966667	1.00723	0.995074	0.990838
	1.27673	0.95889	0.947531	0.933892	0.895442	0.842954	0.740496	0.658871	0.6464	0.741502	0.84078	0.87576	0.910882	0.923894	0.96129	0.960206	0.962071	0.983966	1.00627	0.984821	0.995666	0.997396	0.986631	0.976552	0.967548	0.966667	0.97582	0.974145	0.9825	0.985156	0.976296	0.981846	0.965546	0.961127	0.984865	0.961583	0.896391	0.898364	0.854938	0.734753	0.687916	0.737581	0.829296	0.911299	0.94533	0.989808	1.01082	1.01348	0.97351
	1.27663	0.972516	0.941969	0.93021	0.908847	0.848958	0.765812	0.675654	0.645057	0.719453	0.818031	0.877748	0.887112	0.931444	0.938925	0.955303	0.958672	0.958974	0.958892	0.988041	0.993355	0.990765	0.989145	0.961219	0.968098	0.967413	0.956635	0.974271	0.982097	0.980892	0.965723	0.987664	0.968885	0.97811	0.951193	0.949883	0.906433	0.869266	0.820745	0.732645	0.691597	0.74814	0.854503	0.908802	0.967853	0.958002	1	0.996319	0.991957
	1.27653	0.979894	0.953782	0.941509	0.916065	0.860326	0.773109	0.681265	0.621446	0.69968	0.806612	0.850044	0.896453	0.925183	0.951787	0.953846	0.960932	0.968668	0.985308	0.968468	0.983184	0.970861	0.972715	0.97851	0.987516	0.973442	0.971329	0.962712	0.968349	0.962934	0.963691	0.978571	0.97373	0.982635	0.947951	0.934349	0.895294	0.89158	0.813577	0.718546	0.688406	0.760167	0.867257	0.931551	0.955732	1.01256	0.98549	0.993695	0.988032
	1.27643	0.959205	0.954498	0.932563	0.920179	0.875862	0.798118	0.711755	0.639837	0.6852	0.783361	0.851101	0.897585	0.919043	0.928512	0.949231	0.959511	0.953043	0.961051	0.988754	0.998852	0.995913	0.994452	0.980282	0.96679	0.954918	0.97644	0.998261	0.968537	0.972536	0.959137	0.97381	0.988128	0.968685	0.971847	0.93026	0.892052	0.854358	0.784137	0.693593	0.686988	0.784902	0.865491	0.937433	0.965247	0.975771	1.01444	0.997487	0.976712
	1.27634	0.957672	0.964819	0.948594	0.935874	0.875548	0.803463	0.721177	0.636661	0.667742	0.764411	0.843384	0.874636	0.916052	0.920875	0.947203	0.95451	0.961165	0.964319	0.974408	0.977778	1.00563	0.977337	0.978292	0.984674	0.965517	0.98125	0.984014	0.975525	0.961601	0.964202	0.971269	0.967123	0.952128	0.952103	0.92439	0.895054	0.851767	0.788618	0.697566	0.701818	0.784114	0.905299	0.946237	0.967849	0.987737	1.04934	1.02041	0.96206
	1.27624	0.939646	0.965625	0.948643	0.931671	0.884045	0.814974	0.724614	0.641965	0.661031	0.744966	0.843034	0.885965	0.891544	0.925187	0.94204	0.962762	0.965364	0.970315	0.962857	0.967098	0.981429	0.983942	0.9819	0.963104	0.961378	0.960352	0.971905	0.956072	0.970944	0.96916	0.982982	0.943243	0.966631	0.958726	0.916049	0.887531	0.849299	0.751025	0.693032	0.707885	0.799172	0.898551	0.934238	0.961956	1.01881	0.994299	0.994949	0.976648
	1.27614	0.960847	0.954936	0.945919	0.918969	0.922662	0.832186	0.752066	0.65149	0.632554	0.725424	0.814286	0.871219	0.905292	0.927013	0.936972	0.95778	0.951993	0.962085	0.981517	0.971429	0.984463	0.982222	1.01246	0.959371	0.970181	0.97561	0.988372	0.957018	0.964841	0.972244	0.983987	0.952425	0.973118	0.930475	0.901113	0.880745	0.809976	0.733265	0.683365	0.714286	0.841451	0.903153	0.925358	0.972767	0.990077	1.0126	0.993687	0.989116
	1.27604	0.964554	0.965368	0.947876	0.929236	0.897368	0.834201	0.770058	0.656879	0.632953	0.699574	0.799448	0.858546	0.898113	0.914768	0.948413	0.963722	0.958036	0.9492	0.984283	0.982989	0.979914	0.970501	0.977099	0.942408	0.942579	0.96488	0.959276	0.965157	0.95114	0.94576	0.973984	0.970343	0.96	0.925495	0.880952	0.861675	0.812958	0.724576	0.68933	0.751135	0.86178	0.926554	0.943515	0.981339	0.981461	1.0034	1.00485	0.982432
	1.27594	0.957447	0.962284	0.96184	0.934623	0.90837	0.863676	0.79223	0.675164	0.634426	0.685232	0.779614	0.849654	0.881741	0.906542	0.932137	0.941313	0.960467	0.958564	0.969171	1.00121	0.991367	1.00446	0.980213	0.977303	0.979866	0.966387	0.971275	0.959825	0.953771	0.956795	0.977328	0.949215	0.958919	0.929742	0.892947	0.872449	0.807407	0.72549	0.679083	0.732143	0.839341	0.903366	0.962145	0.958333	0.985823	1.00223	0.998818	0.990716
	1.27584	0.963283	0.94984	0.953047	0.930168	0.923214	0.863799	0.795708	0.694755	0.63145	0.663763	0.761861	0.835851	0.875475	0.912174	0.921115	0.94675	0.941176	0.942857	0.982473	0.97558	0.952586	0.965825	0.962963	0.963365	0.950395	0.958685	0.973098	0.954383	0.946809	0.952344	0.960674	0.953402	0.961411	0.91976	0.877215	0.820972	0.771465	0.717949	0.691406	0.76865	0.873284	0.944134	0.960622	0.979798	0.984783	1	1.01064	0.989583
	1.27574	0.963323	0.970427	0.953954	0.931132	0.920693	0.88759	0.813894	0.716997	0.64401	0.664884	0.765267	0.830403	0.857422	0.910714	0.900865	0.940171	0.941176	0.959851	0.97025	0.993925	0.957787	0.976994	0.971787	0.954054	0.960497	0.975681	0.974907	0.976787	0.961571	0.958433	0.940226	0.964929	0.944505	0.932367	0.875	0.842784	0.77204	0.687229	0.699308	0.7851	0.875676	0.961098	0.951745	0.976718	0.958919	1.0195	0.996499	1.01178
	1.27564	0.967427	0.95321	0.962814	0.933396	0.931097	0.884582	0.826745	0.741176	0.650633	0.643993	0.720266	0.835095	0.846909	0.89228	0.920492	0.931145	0.975115	0.962687	0.962818	0.966507	0.95584	0.948225	0.975194	0.97035	0.967927	0.966887	0.965677	0.961468	0.956081	0.952229	0.943022	0.938447	0.930811	0.892857	0.891051	0.833997	0.735404	0.693966	0.725549	0.789524	0.892157	0.950289	0.98218	0.979482	0.989247	1.01578	0.982778	0.993622
	1.27554	0.953745	0.961025	0.957011	0.939623	0.933579	0.899287	0.836457	0.74677	0.669521	0.65009	0.702624	0.790598	0.861254	0.890424	0.91782	0.93514	0.94702	0.94717	0.955621	0.985185	0.985207	0.977273	0.970219	0.965753	0.956965	0.973659	0.967245	0.944238	0.944251	0.949587	0.948739	0.928166	0.922319	0.89525	0.893758	0.820996	0.743226	0.699441	0.717151	0.809298	0.897124	0.966667	0.97766	0.990981	1.00882	1.00339	0.988359	0.982256
	1.27544	0.962801	0.960938	0.941598	0.958095	0.925069	0.886809	0.856652	0.768041	0.670648	0.646483	0.689981	0.769392	0.863911	0.879342	0.913719	0.91874	0.951969	0.956947	0.951195	0.979218	0.973875	0.957037	0.970359	0.97019	0.964037	0.932892	0.951613	0.963653	0.941781	0.960848	0.954198	0.933014	0.913282	0.903148	0.872063	0.794233	0.716604	0.691537	0.743147	0.828708	0.935374	0.947183	0.951246	0.982838	1.00664	1.01019	1.00461	0.989962
	1.27534	0.9699	0.963883	0.952917	0.921739	0.94052	0.905369	0.866667	0.772414	0.699741	0.643761	0.664773	0.764463	0.854871	0.870761	0.887834	0.919355	0.928435	0.947	0.962475	0.94957	0.964758	0.965465	0.944099	0.937838	0.940909	0.955939	0.953333	0.950606	0.946062	0.948822	0.941126	0.924402	0.920759	0.902469	0.854194	0.791005	0.711538	0.68847	0.763485	0.841452	0.924192	0.966306	0.982301	0.960964	1.00883	1.02181	1.01522	0.998747
	1.27524	0.956213	0.977907	0.967539	0.949203	0.938563	0.921788	0.879581	0.804639	0.698988	0.642857	0.659804	0.750524	0.821611	0.847664	0.872285	0.916376	0.928929	0.936656	0.958377	0.966452	0.96904	0.96423	0.954041	0.95	0.951192	0.948544	0.939048	0.95619	0.953778	0.932343	0.949956	0.936821	0.928987	0.882927	0.843546	0.763708	0.695263	0.700114	0.759336	0.865672	0.927536	0.966019	0.973034	0.985799	0.995418	1.01519	1.03365	0.996207
	1.27514	0.971326	0.951333	0.967641	0.944118	0.928085	0.903435	0.870599	0.803322	0.719828	0.639785	0.641153	0.733475	0.807654	0.852284	0.884817	0.919658	0.904762	0.967708	0.980892	0.975936	0.943511	0.970266	0.934169	0.938272	0.932725	0.94636	0.936733	0.963068	0.948517	0.928454	0.918419	0.931774	0.901695	0.872236	0.832461	0.776439	0.688062	0.709571	0.775076	0.885913	0.955631	0.983153	0.968271	0.985748	0.982619	1.01423	1.02657	0.992472
	1.27504	0.959596	0.965174	0.947084	0.9591	0.947007	0.922127	0.887671	0.843836	0.742504	0.661157	0.642857	0.715823	0.813929	0.840844	0.877622	0.913867	0.925358	0.923077	0.95615	0.966988	0.949074	0.957614	0.952224	0.935484	0.943728	0.949268	0.937918	0.924812	0.912811	0.931855	0.935986	0.924213	0.886878	0.863861	0.809019	0.756935	0.712082	0.72067	0.806911	0.892537	0.944633	0.985437	0.966814	0.989157	1.00117	1.01077	0.997616	0.979721
	1.27494	0.968665	0.982527	0.952215	0.963323	0.932308	0.91548	0.909346	0.839471	0.762035	0.685468	0.648705	0.696507	0.780341	0.81903	0.845486	0.901739	0.904472	0.934196	0.954036	0.955245	0.967105	0.932584	0.946341	0.922969	0.956364	0.959184	0.942308	0.938815	0.906632	0.93543	0.940813	0.916583	0.885246	0.857868	0.797023	0.714667	0.689521	0.721186	0.832645	0.902174	0.967555	0.969623	0.964733	0.983412	0.996458	1.02706	0.996319	0.965206
	1.27484	0.97479	0.959834	0.957265	0.944944	0.948802	0.934	0.936647	0.846899	0.795433	0.696651	0.634985	0.664481	0.758308	0.824312	0.866426	0.889771	0.916499	0.918519	0.961143	0.955862	0.962109	0.934454	0.935374	0.936691	0.931956	0.926337	0.950485	0.922642	0.927065	0.919967	0.917749	0.885939	0.885017	0.840452	0.778656	0.708777	0.669598	0.748869	0.826132	0.906588	0.955056	0.983153	0.969061	0.974419	0.988426	1.00602	1.00624	0.968791
	1.27474	0.94382	1.00287	0.951571	0.935446	0.949657	0.932632	0.918	0.882648	0.805985	0.712062	0.644033	0.67893	0.74002	0.814601	0.847349	0.889587	0.903259	0.913044	0.946007	0.935484	0.944724	0.942953	0.918966	0.948071	0.916769	0.926548	0.926733	0.934698	0.939177	0.91534	0.917326	0.898888	0.868871	0.8398	0.760431	0.711382	0.69401	0.764638	0.842268	0.925852	0.975834	0.991597	1.00566	0.986667	0.997633	1.01125	0.998758	1.00405
	1.27464	0.964183	0.971182	0.956233	0.9508	0.943396	0.939189	0.931435	0.885628	0.830357	0.735294	0.66881	0.674944	0.722689	0.807229	0.846298	0.870642	0.899487	0.908995	0.934758	0.938028	0.948074	0.935875	0.928826	0.953101	0.921348	0.926855	0.947639	0.920952	0.917721	0.891825	0.915789	0.881339	0.859977	0.825596	0.765416	0.712366	0.715415	0.771751	0.880978	0.940239	0.985057	0.991484	0.981859	1.00245	0.989234	1.02785	0.984887	1
	1.27454	0.973646	0.979502	0.974667	0.948941	0.929087	0.940968	0.929271	0.863028	0.834872	0.747454	0.664583	0.65711	0.721925	0.783453	0.836231	0.873849	0.887047	0.894682	0.918502	0.935574	0.933555	0.947189	0.942959	0.942724	0.937743	0.927061	0.937372	0.909892	0.908592	0.891709	0.893836	0.877833	0.842225	0.824495	0.736913	0.714286	0.737726	0.804172	0.880333	0.951952	0.973804	0.990373	0.992081	0.975787	0.988194	1.00866	1.01652	0.977454
	1.27445	0.952167	0.977545	0.988842	0.966799	0.940874	0.956098	0.93424	0.90389	0.85169	0.773262	0.676734	0.663082	0.701987	0.786091	0.818681	0.847122	0.872803	0.897655	0.922559	0.958333	0.944444	0.952218	0.907965	0.918836	0.95896	0.912487	0.932548	0.920619	0.910872	0.892105	0.89417	0.866799	0.855478	0.816195	0.715047	0.705163	0.7393	0.814516	0.874739	0.946482	0.979143	0.967073	0.963004	1.01591	0.984634	1.00245	1.03618	0.997279
	1.27435	0.986547	0.961367	0.961326	0.972752	0.933419	0.942118	0.936905	0.933333	0.870455	0.796053	0.710128	0.657485	0.69281	0.756539	0.823638	0.846823	0.882474	0.889474	0.930839	0.943182	0.911519	0.919014	0.917431	0.940989	0.916103	0.927233	0.915847	0.90333	0.917262	0.889189	0.88214	0.850251	0.832761	0.790404	0.71618	0.701847	0.751938	0.826835	0.900739	0.947211	0.974567	0.998783	0.955801	1.01214	0.99521	1.00623	0.996259	0.977181
	1.27425	0.980597	0.943536	0.957983	0.967258	0.956863	0.94226	0.929782	0.919852	0.868664	0.821839	0.749108	0.659008	0.683559	0.74002	0.787823	0.842779	0.858316	0.888075	0.916573	0.932081	0.946237	0.93705	0.921389	0.970199	0.912088	0.908686	0.928571	0.908482	0.914316	0.871889	0.870722	0.848705	0.81984	0.758145	0.714477	0.702667	0.78784	0.831435	0.919456	0.954365	0.990783	0.982014	0.993236	0.98102	1.01432	1.01384	0.997497	1.00137
	1.27415	0.980539	0.986239	0.97561	0.966216	0.945455	0.92875	0.947497	0.922785	0.870327	0.834772	0.750318	0.691816	0.686833	0.71822	0.781104	0.850943	0.847896	0.879691	0.906712	0.903134	0.90161	0.927273	0.94291	0.916933	0.903005	0.914676	0.911504	0.90099	0.88377	0.878218	0.861224	0.852585	0.83414	0.756688	0.704636	0.730717	0.789817	0.863791	0.926425	0.970766	0.996512	1.00864	1	0.997534	1.00237	1.00247	1.00127	0.984952
[truncated: 72 more rows]
[truncated: 1 more columns]

## Sheet: c
sinθ	Energy (eV)	PL Intensity
[truncated: 946 more rows]
[truncated: 55 more columns]

## Sheet: d
Polarization angle (°)	Energy (eV)	△R/R0
[truncated: 1,116 more rows]

## Sheet: e
Experiment			Simulation
△R/R0	Energy (eV)		△R/R0	Energy (eV)
0.990016	1.43987		0.994769	1.43993
0.955106	1.43965		0.994772	1.43985
[truncated: 2,857 more rows]

## Sheet: f
Experiment				X exciton	X* exciton		Cavity mode			One-exciton					Two-exciton
[truncated: 101 more rows]
