# Supplementary material for: Magnetically-dressed CrSBr exciton-polaritons in ultrastrong coupling regime
Source: Research Square preprint supplement (doi:10.21203/rs.3.rs-3164083/v1), 2023-07-26
Supplement: Supplementary file 9 [file Figure3.xlsx]

## Sheet: a
Energy (eV)	Temperature (K)	ΔR/R0
1.42011	7	1.02381	1.0182	1.01644	1.01958	1.02114	1.01527	1.02002	1.01764	1.01556	1.02368	1.02082	1.01343	1.02681	1.01659	1.01627	1.01242	1.01907	1.01619	1.02024	1.01793	1.01559	1.01318	1.0094	1.02132	1.02062	1.02051	1.01479	1.0173	1.01547	1.01864	1.01615	1.01708	1.01879	1.01943	1.01808	1.0158	1.01823	1.01767	1.01854	1.01069	1.01522	1.01743	1.01822	1.02569	1.01479	1.00929	1.01459	1.01662
1.4199	20	1.01599	1.01888	1.01479	1.0174	1.01434	1.01985	1.02174	1.01476	1.01609	1.01642	1.01482	1.017	1.02071	1.02118	1.01578	1.01704	1.01596	1.01095	1.01383	1.02259	1.01355	1.01766	1.01579	1.00906	1.01231	1.01601	1.01538	1.00741	1.0155	1.01997	1.0063	1.01656	1.01736	1.00496	1.02941	1.0162	1.01491	1.01861	1.01912	1.0135	1.01564	1.01434	1.00899	1.01251	1.01916	1.0151	1.01045	1.01299
1.41969	65	1.0179	1.01676	1.01467	1.02065	1.01407	1.01461	1.01025	1.02074	1.01779	1.02114	1.02061	1.01738	1.01756	1.01639	1.01716	1.02151	1.0172	1.01725	1.00816	1.01518	1.0175	1.01727	1.01417	1.01968	1.00986	1.01553	1.00621	1.01606	1.01306	1.00707	1.02046	1.01928	1.01539	1.02136	1.01428	1.01301	1.01623	1.01399	1.01586	1.01937	1.01506	1.01252	1.01548	1.01634	1.01293	1.01361	1.01452	1.01254
1.41948	96	1.01919	1.02488	1.02304	1.01997	1.02525	1.01317	1.0155	1.02008	1.01864	1.01926	1.01297	1.02528	1.01367	1.02248	1.01899	1.01428	1.011	1.01467	1.01832	1.01195	1.01997	1.01959	1.02149	1.02374	1.02383	1.01819	1.00942	1.02162	1.012	1.01359	1.01399	1.01471	1.02238	1.00985	1.02666	1.01744	1.01837	1.01782	1.01137	1.02056	1.02393	1.01744	1.01953	1.01019	1.01638	1.0187	1.00699	1.01331
1.41927	120	1.02122	1.02374	1.02352	1.0246	1.01769	1.02601	1.01814	1.01694	1.02159	1.02336	1.01131	1.02378	1.01988	1.01724	1.02287	1.01713	1.0164	1.01907	1.0245	1.01432	1.02297	1.01661	1.02468	1.02343	1.02405	1.02402	1.01999	1.01653	1.01873	1.0178	1.02343	1.02403	1.01792	1.02016	1.01692	1.0149	1.0185	1.01541	1.01553	1.01695	1.01966	1.01777	1.01548	1.01942	1.01621	1.01866	1.00986	1.01045
1.41906	130	1.01327	1.00992	1.00911	1.00751	1.01027	1.0027	1.01002	1.01179	1.00865	1.01362	1.01123	1.01361	1.0132	1.00685	1.01411	1.01351	1.00032	1.00904	1.01686	1.01095	1.01342	1.00673	1.0063	1.01536	1.00771	1.01315	1.01239	1.00897	1.01543	1.00902	1.01272	1.01463	1.00602	1.01375	1.00585	1.01507	1.00981	1.01023	1.00916	1.00973	1.00416	1.01246	1.00712	1.00519	1.00359	1.01198	1.00793	1.00833
1.41885	140	1.02186	1.01985	1.01984	1.02305	1.02082	1.02033	1.01563	1.01298	1.02105	1.01543	1.01815	1.02036	1.02503	1.01699	1.02018	1.02167	1.02422	1.01885	1.01689	1.02293	1.01555	1.01829	1.02383	1.0199	1.01388	1.0144	1.02229	1.01945	1.01255	1.01666	1.01906	1.02369	1.02354	1.01601	1.01345	1.01758	1.01625	1.01859	1.02157	1.01993	1.00765	1.01622	1.01958	1.02213	1.01817	1.01699	1.01699	1.01347
1.41864	150	1.02436	1.02476	1.01937	1.01578	1.02453	1.02304	1.01701	1.01933	1.00874	1.02249	1.01748	1.02174	1.02183	1.02176	1.02901	1.02095	1.02405	1.01987	1.02476	1.01594	1.02018	1.0135	1.02171	1.01659	1.02517	1.02494	1.0227	1.0229	1.02766	1.01844	1.02182	1.02158	1.01834	1.02878	1.02014	1.02268	1.02131	1.022	1.0214	1.01673	1.01859	1.01452	1.02057	1.01901	1.01468	1.01179	1.0189	1.02176
1.41843	160	1.02415	1.01758	1.02187	1.01756	1.01524	1.02334	1.02277	1.02417	1.01496	1.01581	1.02013	1.01143	1.02119	1.00967	1.02323	1.02136	1.02004	1.01268	1.01406	1.01788	1.01829	1.01892	1.02006	1.02207	1.01835	1.0167	1.02322	1.02274	1.02283	1.01397	1.01277	1.01366	1.01398	1.02371	1.01716	1.02218	1.02424	1.01851	1.01401	1.01635	1.02153	1.02368	1.02266	1.01355	1.01432	1.00834	1.01597	1.01506
1.41822	170	1.01096	1.01923	1.02292	1.01786	1.01634	1.01644	1.02296	1.01957	1.01934	1.02237	1.01765	1.02047	1.01329	1.02076	1.01893	1.01479	1.0224	1.02353	1.02611	1.01362	1.01988	1.02051	1.01951	1.02344	1.02785	1.01471	1.0202	1.01653	1.015	1.02479	1.01991	1.02048	1.02014	1.01715	1.02125	1.02067	1.01161	1.02474	1.01891	1.01577	1.01405	1.0256	1.01863	1.02078	1.01832	1.01238	1.01729	1.01782
1.41802	180	1.02555	1.02342	1.0162	1.01924	1.01827	1.01847	1.01509	1.0185	1.0148	1.01966	1.02407	1.01629	1.01571	1.01987	1.01458	1.02155	1.01162	1.01514	1.02174	1.01309	1.02029	1.02092	1.01909	1.022	1.02255	1.0189	1.01646	1.01343	1.01697	1.01482	1.01666	1.01536	1.01241	1.0187	1.01288	1.01949	1.01377	1.02161	1.02069	1.0154	1.02453	1.01544	1.01548	1.0225	1.01375	1.01193	1.02278	1.00995
1.41781	200	1.02451	1.02414	1.01715	1.02329	1.01708	1.01719	1.01727	1.02342	1.0132	1.01965	1.01414	1.02209	1.01852	1.01614	1.01574	1.01382	1.01978	1.01118	1.01473	1.01991	1.01775	1.01158	1.02269	1.0179	1.01436	1.02292	1.01965	1.01111	1.01714	1.02118	1.02324	1.01224	1.02414	1.01729	1.01613	1.01624	1.01922	1.01091	1.01869	1.01234	1.0179	1.01991	1.0202	1.01923	1.0181	1.01991	1.02084	1.01806
1.4176	230	1.01925	1.01866	1.01381	1.01249	1.01951	1.01071	1.0244	1.01834	1.00942	1.01451	1.01493	1.01927	1.0109	1.01552	1.01505	1.01809	1.01434	1.01765	1.01876	1.01464	1.01377	1.02418	1.01282	1.01757	1.01132	1.01618	1.02126	1.0112	1.02006	1.01281	1.01111	1.02025	1.01736	1.01339	1.00933	1.01324	1.02188	1.01204	1.01861	1.01307	1.00908	1.024	1.0115	1.01829	1.01903	1.02198	1.02202	1.02002
1.41739	256	1.01642	1.01968	1.01694	1.01943	1.0156	1.01807	1.01929	1.01907	1.01531	1.01619	1.01046	1.02012	1.01562	1.01895	1.01698	1.01831	1.0204	1.01724	1.01341	1.02276	1.01965	1.02084	1.02182	1.01515	1.01864	1.01365	1.01954	1.02461	1.01515	1.01596	1.00901	1.01523	1.01449	1.00726	1.01587	1.00388	1.02126	1.01638	1.02198	1.01688	1.01338	1.01713	1.01594	1.01614	1.01669	1.01331	1.01281	1.02
1.41718	300	1.01706	1.02093	1.02242	1.01948	1.01424	1.02174	1.01625	1.01611	1.01978	1.01523	1.02506	1.01494	1.01418	1.02028	1.01432	1.01982	1.02365	1.0155	1.02285	1.02426	1.02457	1.0237	1.01345	1.01933	1.01619	1.02278	1.01926	1.01662	1.02422	1.02283	1.01604	1.01548	1.01448	1.01806	1.0132	1.01581	1.02642	1.018	1.0216	1.01237	1.01899	1.02151	1.01774	1.02101	1.01448	1.0181	1.02111	1.01766
1.41697
1.41676
1.41656
1.41635
1.41614
1.41593
1.41572
1.41551
1.41531
1.4151
1.41489
1.41468
1.41447
1.41427
1.41406
1.41385
1.41364
1.41344
1.41323
1.41302
1.41281
1.41261
1.4124
1.41219
1.41199
1.41178
1.41157
1.41137
1.41116
1.41095
1.41075
1.41054
1.41033
1.41013
1.40992
1.40971
1.40951
1.4093
1.40909
1.40889
1.40868
1.40848
1.40827
1.40806
1.40786
1.40765
1.40745
1.40724
1.40704
1.40683
1.40662
1.40642
1.40621
1.40601
1.4058
1.4056
1.40539
1.40519
1.40498
1.40478
1.40457
1.40437
1.40416
1.40396
1.40375
1.40355
1.40335
1.40314
1.40294
1.40273
1.40253
1.40232
1.40212
1.40192
1.40171
1.40151
1.4013
1.4011
1.4009
1.40069
1.40049
1.40029
1.40008
1.39988
1.39968
1.39947
1.39927
1.39907
1.39886
1.39866
1.39846
1.39825
1.39805
1.39785
1.39765
1.39744
1.39724
1.39704
1.39684
1.39663
1.39643
1.39623
1.39603
1.39582
1.39562
1.39542
1.39522
1.39502
1.39481
1.39461
1.39441
1.39421
1.39401
1.39381
1.3936
1.3934
1.3932
1.393
1.3928
1.3926
1.3924
1.39219
1.39199
1.39179
1.39159
1.39139
1.39119
1.39099
1.39079
1.39059
1.39039
1.39019
1.38999
1.38979
1.38959
1.38938
1.38918
1.38898
1.38878
1.38858
1.38838
1.38818
1.38798
1.38778
1.38758
1.38739
1.38719
1.38699
1.38679
1.38659
1.38639
1.38619
1.38599
1.38579
1.38559
1.38539
1.38519
1.38499
1.38479
1.3846
1.3844
1.3842
1.384
1.3838
1.3836
1.3834
1.38321
1.38301
1.38281
1.38261
1.38241
1.38221
1.38202
1.38182
1.38162
1.38142
1.38122
1.38103
1.38083
1.38063
1.38043
1.38024
1.38004
1.37984
1.37964
1.37945
1.37925
1.37905
1.37885
1.37866
1.37846
1.37826
1.37807
1.37787
1.37767
1.37748
1.37728
1.37708
1.37689
1.37669
1.37649
1.3763
1.3761
1.3759
1.37571
1.37551
1.37531
1.37512
1.37492
1.37473
1.37453
1.37433
1.37414
1.37394
1.37375
1.37355
1.37336
1.37316
1.37297
1.37277
1.37257
1.37238
1.37218
1.37199
1.37179
1.3716
1.3714
1.37121
1.37101
1.37082
1.37062
1.37043
1.37023
1.37004
1.36985
1.36965
1.36946
1.36926
1.36907
1.36887
1.36868
1.36849
1.36829
1.3681
1.3679
1.36771
1.36752
1.36732
1.36713
1.36693
1.36674
1.36655
1.36635
1.36616
1.36597
1.36577
1.36558
1.36539
1.36519
1.365
1.36481
1.36461
1.36442
1.36423
1.36404
1.36384
1.36365
1.36346
1.36327
1.36307
1.36288
1.36269
1.3625
1.3623
1.36211
1.36192
1.36173
1.36153
1.36134
1.36115
1.36096
1.36077
1.36057
1.36038
1.36019
1.36
1.35981
1.35962
1.35942
1.35923
1.35904
1.35885
1.35866
1.35847
1.35828
1.35809
1.35789
1.3577
1.35751
1.35732
1.35713
1.35694
1.35675
1.35656
1.35637
1.35618
1.35599
1.3558
1.35561
1.35542
1.35523
1.35504
1.35485
1.35466
1.35447
1.35428
1.35409
1.3539
1.35371
1.35352
1.35333
1.35314
1.35295
1.35276
1.35257
1.35238
1.35219
1.352
1.35181
1.35162
1.35143
1.35124
1.35105
1.35086
1.35068
1.35049
1.3503
1.35011
1.34992
1.34973
1.34954
1.34935
1.34917
1.34898
1.34879
1.3486
1.34841
1.34822
1.34804
1.34785
1.34766
1.34747
1.34728
1.3471
1.34691
1.34672
1.34653
1.34634
1.34616
1.34597
1.34578
1.34559
1.34541
1.34522
1.34503
1.34485
1.34466
1.34447
1.34428
1.3441
1.34391
1.34372
1.34354
1.34335
1.34316
1.34298
1.34279
1.3426
1.34242
1.34223
1.34204
1.34186
1.34167
1.34148
1.3413
1.34111
1.34092
1.34074
1.34055
1.34037
1.34018
1.33999
1.33981
1.33962
1.33944
1.33925
1.33907
1.33888
1.3387
1.33851
1.33832
1.33814
1.33795
1.33777
1.33758
1.3374
1.33721
1.33703
1.33684
1.33666
1.33647
1.33629
1.3361
1.33592
1.33573
1.33555
1.33537
1.33518
1.335
1.33481
1.33463
1.33444
1.33426
1.33407
1.33389
1.33371
1.33352
1.33334
1.33315
1.33297
1.33279
1.3326
1.33242
1.33224
1.33205
1.33187
1.33169
1.3315
1.33132
1.33114
1.33095
1.33077
1.33059
1.3304
1.33022
1.33004
1.32985
1.32967
1.32949
1.3293
1.32912
1.32894
1.32876
1.32857
1.32839
1.32821
1.32803
1.32784
1.32766
1.32748
1.3273
1.32711
1.32693
1.32675
1.32657
1.32639
1.3262
1.32602
1.32584
1.32566
1.32548
1.3253
1.32511
1.32493
1.32475
1.32457
1.32439
1.32421
1.32403
1.32384
1.32366
1.32348
1.3233
1.32312
1.32294
1.32276
1.32258
1.3224
1.32221
1.32203
1.32185
1.32167
1.32149
1.32131
1.32113
1.32095
1.32077
1.32059
1.32041
1.32023
1.32005
1.31987
1.31969
1.31951
1.31933
1.31915
1.31897
1.31879
1.31861
1.31843
1.31825
1.31807
1.31789
1.31771
1.31753
1.31735
1.31717
1.31699
1.31681
1.31664
1.31646
1.31628
1.3161
1.31592
1.31574
1.31556
1.31538
1.3152
1.31502
1.31485
1.31467
1.31449
1.31431
1.31413
1.31395
1.31377
1.3136
1.31342
1.31324
1.31306
1.31288
1.3127
1.31253
1.31235
1.31217
1.31199
1.31182
1.31164
1.31146
1.31128
1.3111
1.31093
1.31075
1.31057
1.31039
1.31022
1.31004
1.30986
1.30968
1.30951
1.30933
1.30915
1.30898
1.3088
1.30862
1.30845
1.30827
1.30809
1.30791
1.30774
1.30756
1.30738
1.30721
1.30703
1.30686
1.30668
1.3065
1.30633
1.30615
1.30597
1.3058
1.30562
1.30545
1.30527
1.30509
1.30492
1.30474
1.30457
1.30439
1.30421
1.30404
1.30386
1.30369
1.30351
1.30334
1.30316
1.30299
1.30281
1.30263
1.30246
1.30228
1.30211
1.30193
1.30176
1.30158
1.30141
1.30123
1.30106
1.30088
1.30071
1.30053
1.30036
1.30019
1.30001
1.29984
1.29966
1.29949
1.29931
1.29914
1.29896
1.29879
1.29862
1.29844
1.29827
1.29809
1.29792
1.29775
1.29757
1.2974
1.29722
1.29705
1.29688
1.2967
1.29653
1.29636
1.29618
1.29601
1.29584
1.29566
1.29549
1.29532
1.29514
1.29497
1.2948
1.29462
1.29445
1.29428
1.2941
1.29393
1.29376
1.29359
1.29341
1.29324
1.29307
1.2929
1.29272
1.29255
1.29238
1.29221
1.29203
1.29186
1.29169
1.29152
1.29134
1.29117
1.291
1.29083
1.29066
1.29048
1.29031
1.29014
1.28997
1.2898
1.28963
1.28945
1.28928
1.28911
1.28894
1.28877
1.2886
1.28843
1.28825
1.28808
1.28791
1.28774
1.28757
1.2874
1.28723
1.28706
1.28689
1.28671
1.28654
1.28637
1.2862
1.28603
1.28586
1.28569
1.28552
1.28535
1.28518
1.28501
1.28484
1.28467
1.2845
1.28433
1.28416
1.28399
1.28382
1.28365
1.28348
1.28331
1.28314
1.28297
1.2828
1.28263
1.28246
1.28229
1.28212
1.28195
1.28178
1.28161
1.28144
1.28127
1.2811
1.28093
1.28076
1.2806
1.28043
1.28026
1.28009
1.27992
1.27975
1.27958
1.27941
1.27924
1.27907
1.27891
1.27874
1.27857
1.2784
1.27823
1.27806
1.27789
1.27773
1.27756
1.27739
1.27722
1.27705
1.27689
1.27672
1.27655
1.27638
1.27621
1.27605
1.27588
1.27571
1.27554
1.27537
1.27521
1.27504
1.27487
1.2747
1.27454
1.27437
1.2742
1.27403
1.27387
1.2737
1.27353
1.27336
1.2732
1.27303
1.27286
1.2727
1.27253
1.27236
1.2722
1.27203
1.27186
1.2717
1.27153
1.27136
1.2712
1.27103
1.27086
1.2707
1.27053
1.27036
1.2702
1.27003
1.26986
1.2697
1.26953
1.26937
1.2692
1.26903
1.26887
1.2687
1.26854
1.26837
1.2682
1.26804
1.26787
1.26771
1.26754
1.26738
1.26721
1.26705
1.26688
1.26671
1.26655
1.26638
1.26622
1.26605
1.26589
1.26572
1.26556
1.26539
1.26523
1.26506
1.2649
1.26473
1.26457
1.2644
1.26424
1.26407
1.26391
1.26375
1.26358
1.26342
1.26325
1.26309
1.26292
1.26276
1.2626
1.26243
1.26227
1.2621
1.26194
1.26177
1.26161
1.26145
1.26128
1.26112
1.26096
1.26079
1.26063
1.26046
1.2603
1.26014
1.25997
1.25981
1.25965
1.25948
1.25932
1.25916
1.25899
1.25883
1.25867
1.2585
1.25834
1.25818
1.25801
1.25785
1.25769
1.25753
1.25736
1.2572
1.25704
1.25687
1.25671
1.25655
1.25639
1.25622
1.25606
1.2559
1.25574
1.25557
1.25541
1.25525
1.25509
1.25493
1.25476
1.2546
1.25444
1.25428
1.25412
1.25395
1.25379
1.25363
1.25347
1.25331
1.25314
1.25298
1.25282
1.25266
1.2525
1.25234
1.25218
1.25201
1.25185
1.25169
1.25153
1.25137
1.25121
1.25105
1.25089
1.25072
1.25056
1.2504
1.25024
1.25008
1.24992
[truncated: 880 more columns]

## Sheet: b
Temperature (K)	Cavity mode (eV)	Exciton energy (eV)	g (eV)
6	1.39483	1.38085	0.213
20	1.39483	1.38085	0.213
65	1.39326	1.37854	0.212
96	1.39138	1.37335	0.207
120	1.38936	1.3688	0.2
130	1.38858	1.36714	0.197
140	1.38702	1.36639	0.193
150	1.38578	1.36594	0.189
160	1.3847	1.36534	0.185
170	1.38393	1.36339	0.18
180	1.38269	1.36114	0.176
200	1.38054	1.35667	0.167
230	1.37625	1.35076	0.16
265	1.3732	1.3449	0.155
300	1.37396	1.33477	0.15
