# Supplementary material for: Magnetically-dressed CrSBr exciton-polaritons in ultrastrong coupling regime
Source: Research Square preprint supplement (doi:10.21203/rs.3.rs-3164083/v1), 2023-07-26
Supplement: Supplementary file 13 [file Figure4.xlsx]

## Sheet: a
μ0H (T)	Energy (eV)	ΔR/R0
-2.7	1.37778	1.00313	0.998929	0.993774	0.998349	0.995275	1.01463	1.01093	1.00873	0.996847	0.99418	1.01486	1.00704	1.00575	1.00045	0.999346	1.00252	0.989407	0.990905	0.993102	1.00135	1.00148	1.00673	1.00909	1.01588	1.00346	1.00534	1.01329	1.00006	1.00485	1.00655	1.00193	1.01295	0.994589	0.985246	1.00169	0.984711	1.01499	0.991783	1.00758	0.99695	0.987496	0.996777	1.00339	1.00094	1.01417	1.02045	1.01581	1.01057
-2.6	1.37766	1.00848	1.00415	0.992201	0.997855	1.00911	1.01542	1.00527	1.01736	0.99921	0.990382	1.02927	1.01327	1.00731	0.998087	0.992013	1.00031	0.998273	0.990233	1.00213	1.00341	0.993801	1.02328	0.981077	1.01514	1.0031	1.0013	0.995703	1.0107	0.999409	1.00065	1.00273	1.00281	1.00185	0.987924	1.00337	0.997891	1.01123	0.992866	0.994935	1.00247	1.00017	0.993718	1.00908	0.990461	1.02652	1.00346	1.02179	1.01775
-2.5	1.37754	1.00318	0.993162	0.9864	1.01564	1.01075	1.01608	1.00237	1.02909	1.0071	0.992011	1.01156	0.993982	1.00592	0.994041	1.00485	0.997507	0.990084	0.998641	1.00134	0.996673	0.988394	1.01715	0.987511	1.01638	0.999202	1.00088	1.00976	1.00471	1.01176	0.999914	0.996673	0.997052	1.00069	0.991399	1.00162	0.991105	1.0146	0.996494	1.00969	0.992196	1.00353	0.993808	1.00577	0.99667	1.01724	1.01587	1.02651	1.03113
-2.4	1.37742	1.00175	1.0051	0.985116	1.00229	1.00678	1.01543	1.0075	1.01876	0.995544	0.999656	1.01295	1.00696	1.01351	0.997375	1.00601	0.995593	0.989675	0.999047	0.997163	1.00092	1.00105	1.0134	0.999912	1.01071	1.0101	1.00184	1.02247	0.995154	0.998232	0.993272	1.00362	0.997572	1.01452	0.995523	1.00604	0.98784	1.01116	1.00628	1.0063	0.995498	0.995868	0.991943	1.00082	0.984617	1.0118	1.00372	1.02089	1.02713
-2.3	1.3773	0.991754	0.99478	0.981746	1.00154	1.01156	0.99815	1.01002	1.01873	1.00266	0.997139	1.028	1.00106	1.01279	1.00162	0.987875	0.995928	0.998568	0.994151	0.999252	1.00118	0.992555	1.00239	1.00169	1.01562	1.00177	1.00536	1.00447	1.01247	1.01393	1.00085	1.01605	1.00268	1.01208	0.994049	1.00586	0.992573	1.00203	0.990949	1.00904	0.987415	1.00128	1.0034	1.00481	0.985968	1.01552	1.0238	1.02381	1.01525
-2.2	1.37718	1.00836	1.00462	0.987371	1.00776	1.00508	1.01331	1.00432	1.02099	1.00321	1.0053	1.02427	0.999258	1.00718	0.988478	1.00561	1.01868	0.991572	0.993868	0.980434	1.00202	0.996431	1.00683	1.00423	1.0094	1.01217	0.997085	0.998301	0.989508	1.00695	1.00547	1.0148	1.00004	0.999184	0.991873	0.99973	0.988613	1.02168	0.996167	1.00901	0.996892	0.995693	0.991674	1.00489	1.00365	1.01	1.00836	1.01722	1.01349
-2.1	1.37706	1.0019	0.997608	0.984781	1.00505	1.01932	1.01388	0.998131	1.02347	1.00136	1.00171	1.02713	1.01376	0.999533	1.00056	1.00204	0.991583	0.994038	1.00005	0.985023	1.00561	1.01218	0.998533	0.99524	1.00107	0.990288	0.997604	1.00955	0.998706	1.0136	1.00196	0.999469	1.00406	1.00053	1.00095	1.00622	0.991738	1.02058	0.996529	1.01257	1.0047	1.00585	0.990402	1.01341	0.991886	1.01363	1.01208	1.0192	1.01751
-2	1.37694	1.00983	1.00635	0.989685	1.00952	1.00518	1.01998	1.01202	1.01604	1.00566	0.996844	1.0264	1.02034	0.996945	1.00306	0.993469	0.991367	0.995083	0.98384	0.985451	0.999129	0.997924	0.997663	0.999176	1.01006	0.998025	0.998033	1.00777	0.994091	1.008	1.00513	1.01503	1.0054	0.997347	1.00139	1.01	1.00212	1.00489	0.992715	1.00903	1.00177	0.991808	0.992294	1.00689	0.991519	1.0265	1.01197	1.01576	1.01234
-1.9	1.37682	1.00184	1.00291	1.00001	0.999569	1.0099	1.01115	1.01025	1.01145	1.00116	1.00425	1.02135	1.01109	0.997543	1.00512	0.994207	1.01043	1.00475	0.989966	0.997203	0.997661	0.997141	1.01507	0.986198	1.01514	1.00861	1.00583	1.00599	0.997514	1.00917	0.995891	0.997044	1.00252	0.99565	0.987742	1.00628	0.995604	1.00882	0.998824	0.996737	0.997792	0.99441	0.98832	1.02295	0.994093	1.02516	1.01022	1.02131	1.02541
-1.8	1.37671	1.01173	1.00662	0.988096	1.00557	1.01607	1.0095	1.01297	1.02239	1.00523	1.00113	1.01525	1.00206	1.00868	1.01221	0.985278	1.00155	0.997798	0.991726	0.984917	1.00423	1.00128	1.00764	1.00437	1.01301	1.00635	1.00816	1.0005	1.00229	1.01093	0.998366	1.0032	1.00679	0.998156	0.99243	1.00538	0.998956	1.01351	1.0059	1.00293	0.992488	1.00144	0.99321	0.999737	0.989774	1.0298	1.01427	1.0234	1.01073
-1.7	1.37659	1.00263	0.998771	0.994153	1.00022	1.01604	1.00765	1.00767	1.03137	1.00508	1.00609	1.03077	1.00544	1.0095	1.00075	1.00679	1.00989	0.999691	0.987177	0.98195	1.00183	0.99696	1.00493	0.992462	1.01357	1.0101	1.01279	1.01066	0.994888	0.999638	0.999844	1.00323	1.01236	1.01003	0.99507	1.00214	0.990855	1.00409	1.00502	1.00929	0.986395	1.01	0.984006	1.00124	0.988323	1.03364	1.01018	1.0122	1.00271
-1.6	1.37647	1.00596	0.996914	0.991557	1.01082	1.00871	1.00502	1.01359	1.02632	0.998996	1.01056	1.02173	1.00333	1.00443	0.993699	0.997259	0.995639	0.997414	0.990071	0.978877	1.00584	0.99252	1.0137	0.995283	1.01237	0.99802	0.994305	1.00175	1.00043	0.987787	1.0005	1.00101	0.992938	0.998658	0.987352	1.00223	0.995547	1.00371	1.00124	0.99653	1.00284	0.990171	0.992411	0.996247	0.98858	1.01742	1.01634	1.02995	1.02343
-1.5	1.37635	1.00973	0.99538	0.9892	1.00027	1.00739	1.02385	0.998836	1.01604	1.00578	1.006	1.01667	1.0137	0.994925	1.00283	1.00701	1.0036	0.997747	1.00509	0.99157	1.00085	1.00088	1.00232	0.985359	1.0202	1.0146	0.997631	1.01047	0.998184	0.988566	0.991299	1.00847	1.00834	1.00231	0.987904	0.997477	0.999102	1.01936	0.986282	1.00888	0.995818	1.00331	1.00022	0.999791	0.995768	1.01646	1.0099	1.02153	1.0108
-1.4	1.37623	1.00652	0.99767	0.99113	1.00305	1.00865	1.00582	1.01029	1.01419	1.01159	0.998674	1.02625	1.00276	1.01067	1.0038	0.993634	1.00541	1.00209	0.999832	0.991572	1.00743	0.992975	0.997198	0.995865	1.01323	1.01465	1.00652	1.00751	1.00435	0.99872	1.01251	1.01094	1.0135	0.995355	1.00662	0.991937	0.993097	1.02369	1.0034	1.00281	0.998255	1.00461	0.98198	1.00764	0.99163	1.01979	1.00888	1.02482	1.01456
-1.3	1.37611	1.00603	0.995596	0.991041	1.00248	1.0174	0.999395	1.0056	1.02259	0.999173	1.0126	1.03039	1.01597	1.00271	0.999211	1.00512	1.01001	0.998495	0.998381	0.993772	1.00299	1.01076	1.01333	0.991563	1.00017	0.996179	0.995518	1.00752	1.00805	1.00485	0.995765	0.996773	0.999951	0.997166	0.990731	0.998801	1.00133	1.02106	0.994966	0.995727	0.986584	1.00473	0.998114	1.01989	0.993929	1.02456	1.00594	1.01994	1.00593
-1.2	1.37599	0.99819	1.00746	0.99472	1.02206	1.01752	1.00109	0.999788	1.01105	1.00519	1.00393	1.00795	1.00266	1.00806	0.991742	0.998517	1.00552	0.99139	0.989284	0.986877	1.00369	0.992828	1.00794	1.0019	1.00619	1.00699	1.00504	1.01072	0.992667	0.996321	1.00073	1.00807	1.0213	0.995498	0.999219	1.00136	0.99408	1.00917	0.988715	1.01152	0.990124	1.00519	0.995802	1.01691	1.00488	1.03279	1.00958	1.03182	1.01021
-1.1	1.37587	1.00431	1.0032	0.988753	1.0074	1.00533	1.01113	1.01487	1.02281	0.998445	1.00189	1.01866	1.01015	1.00166	1.00265	1.00267	0.998396	1.00443	0.988213	0.992815	1.00256	1.00426	1.00671	0.991924	1.00932	0.99305	0.994032	1.01102	1.01576	0.997177	1.00276	1.01608	1.00933	1.00334	1.00811	1.00171	0.999258	1.00272	1.00686	1.01482	0.996693	0.98564	0.996503	1.00656	0.993516	1.02665	1.01484	1.02259	1.01678
-1	1.37575	1.00914	0.998734	0.99757	1.01028	1.00126	0.998398	0.994452	1.02971	1.0039	0.995433	1.01641	1.00626	1.0083	1.00109	0.99456	1.00254	0.993008	0.994855	0.984297	1.00846	1.00128	1.01177	0.9933	1.01628	1.00385	1.00138	1.01068	0.992411	1.00704	1.00023	1.00104	1.01704	0.99457	0.997828	0.989839	0.994665	1.01363	0.996531	1.0025	0.998844	1.00916	0.993154	1.00623	0.996404	1.02053	1.01854	1.00938	1.01586
-0.9	1.37563	1.01207	1.00516	0.997806	1.00121	1.0038	1.01075	1.00767	1.02436	0.999547	1.00231	1.00944	1.00179	1.0146	1.00643	0.996618	0.998069	0.998819	0.995642	0.996072	1.00911	1.00586	1.01188	0.997504	1.01282	0.996689	1.01316	1.02504	0.997552	0.997651	1.0041	1.00113	0.996182	0.990733	1.00188	0.993606	0.997146	1.01515	1.00535	1.01277	0.987359	0.986761	1.00279	1.00814	1.00493	1.02345	1.02031	1.03227	1.01615
-0.8	1.37551	1.00079	1.00678	0.985467	1.00586	1.01033	1.01255	1.00473	1.02468	1.00021	0.9936	1.02788	1.01291	1.01559	1.00071	0.996375	0.999081	1.0035	0.998125	0.989324	1.00534	0.988351	1.00729	0.99492	1.02007	1.00354	1.00534	1.00763	0.992816	1.00084	1.01149	1.00078	1.01128	1.02557	0.998586	0.99838	0.996676	0.999602	0.992704	1.01247	1.01194	1.00629	0.997846	1.00274	1.00889	1.0187	1.00636	1.01857	1.01611
-0.7	1.37539	1.00762	0.993789	1.00186	1.00296	1.01236	1.00874	0.99732	1.02016	1.00338	1.0037	1.0132	1.01548	1.0112	0.997371	0.996083	1.01396	1.01214	0.996581	1.00397	1.00421	1.00161	1.01682	0.98786	1.00582	1.00646	1.00498	1.01374	1.01108	0.998363	1.00602	1.00715	0.995107	0.991173	1.0023	0.995875	0.997148	1.01119	0.999395	1.00632	1.00625	1.00664	0.981605	1.01238	0.999392	1.01784	1.01256	1.01743	1.00652
-0.6	1.37528	1.0065	1.00447	0.991331	1.01396	1.00219	1.01784	1.00716	1.02273	0.999603	1.00127	1.01061	1.00396	1.00863	0.98836	1.00217	1.00021	0.997572	0.997337	0.989665	0.997766	1.00598	1.01488	0.987776	1.01453	1.008	1.00725	1.01953	1.00821	1.01361	1.0035	0.998647	1.01099	0.994005	0.994389	1.00797	0.996124	1.01142	1.00506	1.00012	0.997212	0.998809	0.996633	1.00179	1.00742	1.02605	1.00488	1.01788	1.02852
-0.5	1.37516	1.01246	0.999758	0.99857	1.00077	1.02051	1.01073	1.01336	1.02049	1.00838	1.00274	1.00917	1.00482	1.00491	1.00293	0.994693	0.996123	0.991574	0.997371	0.99381	0.997039	0.995318	1.00388	1.01004	1.02734	1.00225	1.00045	1.01205	1.01331	1.0061	0.999028	1.0066	1.00645	1.00153	1.00036	0.992627	1.006	1.0197	0.998634	1.00036	0.997932	1.01007	0.996722	1.00664	1.00031	1.0259	1.00867	1.0157	1.01268
-0.4	1.37504	1.00468	1.01211	0.990311	1.00228	1.00762	1.01893	1.00577	1.02156	1.00572	0.993114	1.02015	1.00954	1.01008	1.01705	0.994421	1.00546	0.991359	0.994577	0.997838	1.00312	0.9882	1.00748	1.00091	1.01084	0.997619	0.98716	1.00791	0.99927	1.00694	0.997129	1.00511	0.998467	1.01706	0.988235	1.00051	0.989041	1.0126	0.996901	1.00366	1.00373	0.999744	0.993678	1.0056	1.00254	1.01692	1.00869	1.02736	1.00799
-0.3	1.37492	0.993015	1.00544	0.993273	1.0061	1.01272	1.00949	1.01323	1.03196	1.0091	0.997604	1.00878	1.01404	1.00429	1.00557	0.994584	1.00569	1.00003	1.00198	0.992617	1.01015	0.994847	1.01898	0.988604	1.00777	1.00525	1.00505	1.00371	0.989005	1.00473	1.01048	1.01023	1.00647	1.00188	0.997692	1.00547	0.997163	1.00025	0.995338	0.999861	1.00191	1.0129	0.994176	0.996187	0.990758	1.01304	1.01752	1.0196	1.01326
-0.2	1.3748	0.999466	1.00617	0.997811	1.0066	1.01842	1.00858	1.01323	1.03465	0.999134	1.00376	1.01478	1.01421	1.01442	1.01259	1.00359	1.00616	0.998849	1.0054	0.991722	0.999517	0.991111	1.00414	0.997914	1.01099	1.00114	0.994403	1.00802	1.00725	1.01338	0.996423	1.00949	1.01429	0.998109	0.996357	1.00699	0.981032	1.0104	1.00663	0.993508	1.0086	1.01022	1.00321	1.02003	0.996699	1.01616	1.01281	1.01281	1.03086
-0.1	1.37468	1.01002	1.00354	0.98697	1.01193	1.02038	1.00632	1.00882	1.02914	1.00516	0.999347	1.02225	1.02017	1.01982	0.988738	0.995345	1.00974	1.00719	1.00103	0.98863	1.00135	0.996956	1.02057	1.0085	1.00758	0.994892	1.00049	1.0085	1.00643	1.00292	1.00132	0.999768	1.01395	1.00841	1.00047	1.01823	0.998424	0.999711	0.993367	1.00667	0.995828	1.0013	0.987905	1.01756	0.985844	1.03102	1.01279	1.01209	1.02388
0	1.37456	1.00045	1.00353	0.98361	1.00564	1.00854	1.00992	1.00938	1.02331	1.0054	1.0042	1.0173	1.0131	1.00761	1.00606	0.998986	0.997559	1.00128	1.00297	0.994302	1.01043	0.994608	1.01322	0.997801	1.00422	0.999918	1.01174	1.00306	0.994206	1.00906	0.992156	1.01161	0.991062	0.996189	0.99019	1.00434	1.00798	1.01604	0.996079	1.01065	0.993056	0.995126	0.993645	1.004	1.00468	1.02094	1.01372	1.00909	1.01102
0.1	1.37444	1.0012	1.00474	1.00567	1.00236	1.00882	1.02018	1.0066	1.02166	1.00396	1.00196	1.01647	1.00349	1.00143	1.01608	1.00736	1.00421	1.00615	1.00005	0.995614	1.00452	1.00263	1.01696	0.99867	1.00682	1.00854	0.990787	1.01209	0.997476	1.00636	1.00643	0.99064	1.00777	1.01041	0.997805	0.999689	0.995338	1.012	1.00302	1.00471	1.00782	1.01238	0.998555	1.02651	1.01073	1.02188	0.997765	1.02359	1.02162
0.2	1.37432	1.0107	1.00184	0.997181	1.00724	1.01325	1.02006	1.00961	1.02071	0.999704	1.00144	1.01288	1.01268	1.00369	1.0082	0.998407	1.01247	1.00718	0.995613	0.993742	1.00252	0.997929	1.0035	0.988473	1.0146	1.0014	1.00367	1.00907	0.993563	1.00303	1.00263	1.01083	1.00467	1.00358	0.998879	1.0001	0.995905	1.00644	0.989797	1.00388	0.999422	1.00072	1.00325	1.00799	1.00072	1.03187	1.01177	1.00975	1.01551
0.3	1.37421	1.00744	0.99909	0.98561	0.998509	1.01039	1.01801	0.999048	1.0151	1.0115	0.997226	1.0103	1.01456	1.00522	0.986125	1.00343	0.999306	0.993152	0.998747	0.998209	1.00752	1.0042	1.00975	0.994105	1.00754	1.00107	1.01587	1.0044	0.984315	1.00307	0.999244	1.01284	0.998856	0.987929	0.99574	1.01848	0.999132	1.00623	0.998272	1.00465	0.99117	0.99791	1.0018	1.00383	1.00881	1.02167	1.01654	1.01582	1.01099
0.4	1.37409	1.00777	0.990821	0.997414	1.0119	1.01403	1.00979	1.00517	1.01609	1.00229	0.995805	1.01526	1.00912	1.00328	1.01396	0.992593	1.00892	0.998702	1.00172	0.988948	1.00826	1.003	1.01165	1.00883	1.02276	1.00049	0.99615	1.00802	1.00674	1.00272	1.00071	1.00835	1.00141	1.00464	1.00281	0.998412	0.994569	1.02071	0.987022	1.01386	1.00327	1.01227	0.990996	1.00661	1.00448	1.01714	1.00858	1.02061	1.01389
0.5	1.37397	1.0037	0.998616	1.0032	0.998151	1.01363	1.0109	1.00686	1.01669	1.00754	0.995238	1.01874	1.0054	1.00755	1.00718	1.00281	1.01626	0.996985	1.0026	0.992706	0.993636	0.989955	0.998382	0.987938	1.02521	1.00469	1.00149	0.997827	0.991813	1.01467	0.991436	1.01638	1.00571	1.00301	0.989574	1.01132	0.997352	1.02118	0.992525	1.00734	0.996792	0.994983	1.00251	1.01836	0.997365	1.02017	1.01664	1.02536	1.01655
0.6	1.37385	1.00752	0.995306	0.99209	1.00511	1.01331	1.00776	1.00833	1.02283	1.01696	0.996174	1.02855	1.00246	1.00075	0.995108	1.01224	1.00032	1.00528	0.99503	0.988523	1.00624	1.00103	1.00918	0.992469	1.00316	1.00365	0.991705	1.01248	1.00731	0.999577	1.01986	0.998186	1.00033	1.01772	1.00781	0.998292	1.00757	1.01331	1.00139	1.0099	0.992782	0.997268	1.00048	1.02007	0.998866	1.02872	1.02329	1.01794	1.0087
0.7	1.37373	1.01077	1.00255	0.989589	1.00611	1.00327	1.01029	1.00522	1.02321	1.00514	1.00098	1.01301	1.01506	1.00517	0.997723	0.994331	1.00798	1.00061	0.997318	1.00024	1.00501	0.999753	1.00904	0.997786	1.01527	1.00821	1.0056	1.00655	1.00691	1.00237	1.00943	1.00143	0.998566	1.01047	1.00733	0.995238	0.999354	1.00797	0.985579	1.01402	0.993814	1.00734	0.986691	1.01206	0.982859	1.02772	1.01612	1.02336	1.02443
0.8	1.37361	1.00871	1.00395	0.984914	0.993396	0.998789	1.00762	1.00502	1.0118	1.00591	0.998839	1.02342	1.01828	1.00595	1.00954	0.993378	1.00318	1.01201	1.00154	0.987686	1.00756	0.992011	1.00741	0.998092	1.00057	1.00626	1.00734	1.00206	1.01242	1.00592	1.00825	1.00824	1.01266	1.01463	0.996984	1.00401	0.99761	1.00336	0.997746	0.993031	0.989927	0.99702	1.0181	1.00553	0.999297	1.01325	1.01286	1.02469	1.02074
0.9	1.37349	1.00744	1.0025	0.991447	1.01167	1.00584	1.01141	1.00576	1.02254	1.01405	1.00753	1.0174	1.00049	1.01009	0.995942	1.00135	1.00735	0.997041	1.00135	0.989089	1.0147	0.99005	1.01504	0.985463	1.02005	1.00306	1.00376	1.00985	0.999411	0.98701	1.00883	1.00988	1.00105	1.00055	0.985603	1.01715	1.00315	1.0092	1.00147	1.00616	0.993422	1.00687	0.997995	1.01596	0.997287	1.03093	1.02633	1.01287	1.00124
1	1.37337	1.00479	0.995948	0.99371	1.0049	1.01004	1.00428	1.01877	1.01078	1.00261	1.00422	1.0187	1.00976	1.01227	1.02146	0.998952	1.0151	1.00398	1.00033	0.998313	1.00215	0.999161	1.01121	0.996367	1.01286	1.01163	1.00834	1.01528	1.00886	1.00942	1.01282	0.994615	0.995538	0.99406	0.994932	0.999531	0.987539	1.01652	1.00649	1.0082	1.00415	0.995296	1.00902	1.01574	0.988319	1.02525	1.01749	1.01339	1.01715
1.1	1.37326	1.01021	1.00662	0.993941	1.00824	1.01319	1.01241	1.00687	1.01394	1.00014	1.00564	1.0196	1.01531	1.00201	0.995613	0.99386	1.00291	0.98526	1.00287	1.00108	1.00435	0.998585	1.016	1.01905	1.01943	1.00644	1.00694	1.02553	1.00997	1.00569	1.00803	1.00619	1.01387	1.00375	0.993662	0.984575	0.997824	1.01972	1.00605	1.00229	0.999349	1.00694	0.991654	1.01429	0.996197	1.03193	1.01635	1.01846	1.0243
1.2	1.37314	0.99238	1.00776	0.998865	1.00211	1.00888	1.02366	1.01272	1.0143	1.00694	1.01798	1.01862	1.01191	1.00229	1.01376	0.99511	0.995355	1.00086	1.00309	1.00061	1.00567	0.994823	1.01131	0.993592	1.01266	1.005	0.996239	1.01832	1.00355	0.991081	0.995498	1.00621	1.01569	0.984147	0.985624	1.00449	0.99645	0.997225	0.995605	1.01738	0.991476	0.989258	0.99803	1.02013	1.00576	1.02094	1.00927	1.01721	1.01251
1.3	1.37302	1.00993	1.00278	0.997306	1.02114	1.00658	1.01749	1.00804	1.03448	0.997626	1.00839	1.02878	1.02185	1.00561	0.999656	1.00853	1.01306	1.00047	0.998468	0.99509	0.998978	0.991312	1.02096	1.00998	1.01429	0.993337	1.00752	1.00452	1.00162	1.00714	1.00295	1.01391	0.995928	0.995955	1.00802	1.02256	1.00095	1.01579	1.00966	1.00864	1.00605	0.997395	0.988308	1.01569	0.996915	1.02118	1.00897	1.03165	1.01819
1.4	1.3729	1.00491	1.02096	0.996426	1.01338	1.00926	1.00927	1.01792	1.02113	1.01174	1.01562	1.02923	1.00698	1.00872	1.01534	1.00112	0.992588	1.00515	1.00708	0.99813	1.00266	0.995304	1.01023	0.988857	1.00299	1.00186	1.01212	1.00601	1.00725	0.990398	0.995131	1.00346	0.998029	0.989517	1.00409	1.00383	0.995384	1.01565	1.00221	1.01241	1.00472	1.00798	1.00824	1.00782	0.996883	1.02048	1.02039	1.0181	1.01494
1.5	1.37278	1.0124	0.999721	1.00007	1.01449	1.00953	1.01003	1.00805	1.01143	1.01829	1.018	1.02634	1.01053	1.01166	0.994533	1.00386	1.01492	0.997627	0.988565	1.00193	1.00902	0.993921	1.00862	0.988492	1.01137	1.00164	1.00974	0.993288	0.99652	0.994508	1.00466	1.00732	0.999165	1.00277	1.00373	0.995615	0.998987	1.01473	0.998909	0.996142	0.994714	1.00469	0.991341	1.01621	0.990461	1.01996	1.01902	1.02038	1.00852
1.6	1.37266	0.99995	0.995895	0.995815	0.995469	1.01173	1.00983	0.998476	1.02511	1.00572	1.01532	1.01705	1.01387	1.00126	1.00807	0.995601	1.0107	1.0018	0.999291	0.995932	0.9986	0.995975	0.996094	1.00163	0.999336	1.00691	1.01376	1.00504	1.00601	1.00822	1.0172	0.999223	0.998574	0.989234	0.994529	1.00589	0.991191	1.00642	0.99581	1.01616	0.997084	1.00846	0.998754	1.00444	1.01174	1.03874	1.01708	1.01445	1.00726
1.7	1.37255	1.00736	1.00258	0.997129	1.0026	1.01992	1.01765	1.00743	1.00888	1.01553	1.00425	1.02398	1.0133	1.02056	1.01339	1.00793	1.00589	0.98815	1.00355	1.00165	1.01193	0.998688	1.00734	0.998216	1.01285	0.996211	1.00197	1.01416	1.00428	1.0019	1.00513	1.00836	1.01544	0.998054	1.00068	1.01839	0.991614	1.00811	1.0135	1.01133	0.994084	0.993876	0.988484	1.01853	1.01124	1.01602	1.01488	1.02384	1.01081
1.8	1.37243	1.00757	0.998257	0.999299	1.00963	1.01686	1.01396	1.01836	1.0193	1.00892	1.0022	1.01642	1.00646	1.0082	1.00885	1.0032	0.998381	0.996252	1.00795	0.995629	1.02509	0.993462	1.01121	0.993347	0.999353	1.00886	0.999092	1.01604	1.01053	1.01711	1.02021	1.00319	1.00731	0.997674	1.00345	1.00118	1.0024	1.00914	1.0028	1.00484	1.00218	1.01161	0.994503	1.0248	0.99714	1.01351	1.02493	1.02573	1.02084
1.9	1.37231	1.00659	0.99563	0.998531	1.00944	1.01876	1.02261	1.01433	1.01652	1.00844	1.00995	1.01788	1.01246	1.00183	1.00704	1.0057	1.0023	1.00339	1.0044	0.994159	1.01152	1.00661	1.00911	1.00862	1.00374	1.00266	1.01022	1.02111	1.00093	1.00601	1.00053	1.00526	0.999476	0.996965	1.00239	1.00439	0.992712	1.01132	0.99824	1.00352	1.00426	0.992668	1.0016	1.02496	1.00428	1.01652	1.00929	1.0201	1.01489
2	1.37219	1.00453	1.00891	0.991143	1.00293	1.01979	1.01008	1.01035	1.02531	1.00886	1.00677	1.01251	1.01134	0.998605	1.01129	1.00463	1.01717	1.00809	1.00055	1.01065	1.00512	0.977407	1.0179	0.995247	1.00885	1.01124	1.00357	1.00771	1.0061	1.01482	1.01926	1.01383	1.00628	0.996614	0.995854	1.00286	0.997365	1.01256	1.00561	1.01271	1.00025	1.00903	1.00186	0.999082	0.998707	1.03238	1.0205	1.01596	1.00483
2.1	1.37207	1.00938	1.00015	0.99521	1.00969	1.01314	1.02138	1.01763	1.02984	1.01148	1.00634	1.01428	1.01313	1.00611	1.00917	0.994293	1.01134	0.99318	1.00409	0.995925	1.01308	0.994826	1.01459	1.00616	1.00232	0.992959	1.00712	1.00737	0.980231	1.00961	0.98762	1.01059	0.9963	0.999806	0.997822	1.00315	0.996001	1.02053	0.999537	0.997417	0.995531	1.01266	0.990047	1.01558	1.00049	1.02277	1.01905	1.02466	1.02165
2.2	1.37195	1.00163	0.998648	0.990353	1.00371	1.02757	1.00308	0.999797	1.02942	1.00806	1.00977	1.02083	1.00536	1.01016	0.992363	0.999633	1.01083	1.00252	0.995403	0.991576	1.03094	0.994994	1.00987	1.00207	1.02008	1.00435	0.99668	1.01135	1.00045	1.00533	1.00196	1.01221	0.993347	1.00422	0.999348	1.01431	0.994239	1.01512	0.998543	1.0086	1.0085	1.00247	1.00264	1.00925	1.00136	1.02236	1.03318	1.02822	1.01685
2.3	1.37183	1.00463	1.0014	0.993677	0.997159	1.01057	1.01214	1.01672	1.03324	1.00838	1.0107	1.02811	1.00745	1.00467	1.00329	0.995609	1.00293	1.00538	1.00137	0.994477	1.00157	1.00378	1.00841	0.992463	1.01799	1.00511	1.00212	1.01023	1.00601	1.00002	0.997849	0.997553	0.990203	0.989538	1.00687	1.00012	0.999283	1.00216	0.995955	0.999766	1.00351	1.00291	1.00201	1.01403	0.994897	1.0159	1.00275	1.01492	1.02077
2.4	1.37172	0.998926	1.00387	0.988246	1.0066	1.00497	1.01778	1.00055	1.02829	1.01315	0.993464	1.0123	1.00994	1.01863	1.00973	1.00744	1.00263	0.998887	0.991518	1.00434	1.0071	0.997798	1.01694	1.00401	1.00635	1.01023	1.00259	1.00174	0.997962	1.00538	1.01807	1.0157	1.0167	1.00291	0.986883	1.00552	1.00515	1.0214	1.00752	1.00845	1.0047	1.01197	0.998153	1.02809	1.0022	1.02359	1.02058	1.01091	1.02234
2.5	1.3716	1.0052	1.00712	0.983788	1.01539	1.01686	1.01472	1.00642	1.01983	1.01464	1.00416	1.02402	1.02044	1.00768	1.00011	1.00647	1.00205	1.00667	1.00439	0.997418	1.00508	0.993138	1.00779	1.00438	1.016	1.01105	0.997571	1.01586	1.0029	1.0012	0.991642	1.00387	1.00143	1.00323	1.0009	1.00987	0.993578	1.01345	0.997059	0.996794	1.00204	1.00746	0.999754	1.01817	1.01182	1.0262	1.02275	1.02849	1.01783
2.6	1.37148	0.997459	0.993101	0.989602	1.00167	1.01311	1.01703	1.00713	1.02197	1.00937	1.00646	1.01975	1.01121	0.998007	1.0155	0.984503	1.01376	1.00354	0.997882	0.9981	1.00673	1.01115	1.0091	1.00468	1.00891	1.0154	0.990405	1.01595	1.0088	0.991628	0.997428	1.01269	1.00653	0.993976	1.00236	1.0069	0.996339	1.00629	0.994852	0.997641	0.995419	0.995488	1.00072	1.00763	1.00165	1.02752	1.00903	1.01134	1.02159
2.7	1.37136	1.00577	0.99959	0.99698	1.00328	1.01074	1.00919	1.00907	1.02055	1.00259	0.989734	1.0112	1.0101	1.01348	1.00228	0.995643	1.02267	0.996675	1.00769	0.985224	1.001	0.997837	1.00944	1.00532	1.02079	1.00232	0.997796	1.01332	0.995968	1.01187	1.00411	1.00071	1.00488	0.99368	1.00605	0.988979	0.995066	1.01212	1.00574	1.01276	0.999583	1.00456	1.00511	1.00528	1.00384	1.0271	1.00957	1.01723	1.01317
	1.37124	1.00205	0.995191	0.992335	1.00414	1.02737	1.02371	1.00968	1.02217	1.00195	1.01377	1.03068	1.01904	1.00591	1.01247	1.01436	1.00823	1.00324	0.994912	0.998838	1.0002	1.00536	1.00623	1.00678	0.998191	1.00024	1.00049	1.00132	0.996215	0.994094	1.00168	1.00193	1.00525	1.01729	1.00944	0.9963	0.997957	1.00275	0.993342	0.997469	1.00193	1.00358	0.987997	1.01507	0.998141	1.02496	1.01656	1.02623	1.02037
	1.37113	1.00235	0.990862	0.995783	1.00392	1.0122	1.02167	1.00288	1.02765	1.00802	0.997069	1.02031	1.00983	1.01154	1.01089	0.994065	0.999205	1.00839	1.00115	0.991514	1.00247	0.997196	1.02323	0.99528	1.00236	1.00041	1.00367	1.01193	1.00653	1.00605	1.00088	1.0065	0.990036	0.995029	1.00505	0.994151	0.993893	1.00967	1.00385	1.00788	0.994412	1.00242	1.00608	1.0176	1.00344	1.02071	1.01668	1.02235	1.01183
	1.37101	1.01196	0.996983	0.993204	1.00846	1.01648	1.01021	1.00451	1.02475	1.00945	1.00292	1.01975	1.00986	1.01072	1.00907	0.993954	1.00195	1.00228	0.998825	1.00028	1.00173	0.98932	1.00886	1.00599	1.01612	0.991297	1.0062	1.00334	0.99689	1.00448	0.99936	1.00777	1.00203	1.00561	0.990662	1.00539	0.994376	1.00992	1.00065	1.00947	1.00521	1.0072	1.00736	1.01824	1.00577	1.04206	1.00576	1.01086	1.0152
	1.37089	1.00215	0.995123	0.997458	1.01042	1.00381	1.01672	1.01444	1.02319	1.0066	1.01135	1.01709	1.00947	1.00236	1.01315	0.993046	1.01303	1.00357	0.999887	1.00567	1.00972	1.00721	1.00178	1.00003	1.00975	1.00017	1.0173	1.00915	0.998588	1.01226	1.01291	0.995767	1.00649	0.99655	0.991859	1.00083	0.997337	1.01105	1.00934	1.01414	0.998685	1.02016	1.01154	1.00473	0.996592	1.03357	1.00987	1.01456	1.02581
	1.37077	1.0144	0.996479	0.994787	1.00343	1.00657	1.01221	1.01526	1.02642	1.01064	1.01641	1.00526	1.01118	1.01147	1.00031	1.00579	0.996299	1.00513	0.990621	0.997351	1.01113	1.00454	1.0075	0.995992	1.00068	0.997578	1.00664	0.986878	0.991868	1.00578	1.01123	1.01123	0.999472	1.00196	1.0082	1.00334	0.994504	1.01918	1.00741	1.00536	1.00618	1.00433	0.989348	1.01011	0.999685	1.02114	1.01121	1.02154	1.01725
	1.37065	1.0147	0.998337	0.991989	0.996209	1.01522	1.00237	1.01957	1.01803	1.01678	1.00442	1.02215	1.01561	1.01314	1.01006	1.00153	0.997632	1.01364	0.999017	0.989762	1.00784	0.991237	1.00541	0.996165	1.00824	0.99975	1.01039	1.02462	1.00542	1.00622	1.00759	0.995114	1.00408	1.00408	1.00783	0.995682	0.999595	1.00267	0.9945	0.998971	0.990849	1.00138	1.00391	1.00856	1.01147	1.02413	1.00363	1.02664	1.01794
	1.37054	1.01102	0.995613	0.998896	1.00797	1.00557	1.018	1.00744	1.01476	1.01559	1.0078	1.02018	1.0194	1.00696	1.00181	1.00616	1.01848	0.992206	0.997299	1.00497	0.99861	0.992656	1.00322	0.999533	0.998403	1.00624	0.99682	1.00063	0.993824	1.00503	0.991471	1.00586	0.998807	0.994828	0.99583	1.00143	0.996291	1.00893	1.0047	1.00662	1.00869	1.00692	0.996692	1.01112	1.00614	1.03457	1.00743	1.01743	1.02143
	1.37042	1.00167	1.00331	0.993487	1.00658	1.01041	1.01923	1.01552	1.02751	1.01305	0.99572	1.0237	1.01521	1.0166	1.01558	1.01125	1.00176	0.998853	1.01033	0.998852	0.995502	1.00424	1.00008	0.996027	1.01481	1.00556	1.00308	1.01943	0.992529	1.01346	1.00098	1.00338	0.996333	1.00985	0.981926	0.99901	0.995091	1.01154	0.988979	1.00209	0.999718	1.01307	1.01604	1.01124	1.01364	1.0139	1.00848	1.02752	1.02031
	1.3703	1.00928	1.00438	0.998773	1.0161	1.00997	1.01082	1.01312	1.01288	1.00999	1.00409	1.0142	1.00198	1.0091	0.997372	1.00012	1.00128	1.00419	1.01457	0.986979	0.996723	0.996757	1.00549	0.989848	1.00578	0.998859	1.00547	1.00138	1.00444	0.996215	0.998259	1.01403	0.996301	0.996596	1.00628	0.995613	0.990171	1.01133	1.00977	1.0088	0.990841	1.0044	1.00061	1.02509	1.00767	1.02478	1.01359	1.02325	1.01528
	1.37018	1.00408	0.999887	0.996801	1.00624	1.01822	1.01278	1.0106	1.01512	1.00334	1.0059	1.01985	1.01002	1.00309	1.02255	1.00042	0.991886	1.00899	0.999931	1.00936	1.00693	0.99911	1.02122	0.999987	0.999412	0.980871	1.00544	1.00779	0.997626	1.00037	0.996644	1.01069	1.00087	0.991306	0.997596	0.999016	0.997579	1.01215	0.99937	1.01334	0.986966	1.00071	1.00055	1.01533	0.995513	1.02638	1.01573	1.01513	1.02258
	1.37006	1.00447	1.00893	1.00741	1.0115	1.01824	1.01854	1.01042	1.00574	1.00869	1.01201	1.02189	1.02131	1.01493	1.0034	1.00002	0.992746	1.00081	1.0061	1.00572	1.00557	1.00521	1.01667	1.00517	1.00998	1.00749	1.0076	1.01146	0.987933	0.997569	1.01445	0.999156	1.00193	1.00114	0.996917	0.994959	1.00499	1.02028	0.992292	1.0078	1.00089	1.01597	1.00457	1.01706	1.01184	1.03063	1.00895	1.01402	1.01535
	1.36995	1.00024	1.0123	0.996968	0.994141	1.00943	1.01361	1.00426	1.02386	1.01049	1.01001	1.02311	1.00872	1.00695	1.02154	0.996912	1.00386	1.00289	1.00279	0.998609	1.00383	0.990733	1.02182	0.997027	1.0101	1.01239	1.0152	1.01165	1.01413	0.999124	0.988556	1.00787	0.999064	0.995489	0.989746	1.00048	0.989854	1.00695	1.00034	1.01263	1.00203	1.00373	0.99515	1.01492	1.01749	1.01835	1.02425	1.01515	1.01021
	1.36983	1.00492	0.985586	1.00565	1.00283	1.02415	1.02771	1.0177	1.02292	1.01014	1.00297	1.02407	1.00251	1.01178	1.01377	1.01074	1.0084	0.999824	0.985717	1.01098	0.996771	0.98101	1.00414	0.999037	1.01344	0.98779	1.00207	1.01801	0.98945	1.00102	1.00105	0.991912	1.00032	0.997188	0.997992	1.0098	0.994619	1.0004	1.00273	1.00789	1.00653	1.01357	1.01178	1.0261	0.991988	1.03464	1.01903	1.02475	1.00466
	1.36971	1.01435	1.00687	0.984041	1.01451	1.02679	1.01023	1.0038	1.0189	1.00963	0.999814	1.0244	1.02071	1.00306	1.0004	0.997302	1.00555	0.994527	0.986618	0.99524	1.02015	1.0118	1.01436	0.993483	1.00415	0.995694	1.00906	1.01099	1.00316	1.01265	1.01225	1.00185	1.0057	0.997651	0.99842	1.00406	1.01686	1.02191	1.00321	1.00791	1.00275	1.01081	0.992566	1.01949	1.00108	1.02838	1.01174	1.02462	1.01933
	1.36959	1.01488	1.00362	0.99601	1.01071	1.0082	1.01656	1.01868	1.01896	1.01746	1.01152	1.02951	1.00674	1.00546	1.00675	1.00168	1.01628	1.01287	0.999137	0.994422	0.9957	0.999167	1.00924	0.994977	1.01056	0.994942	1.00754	1.01053	0.989746	1.01279	0.995661	0.990887	0.995778	0.993171	0.996114	1.00225	1.00074	1.00806	0.999284	1.00191	1.00917	1.01272	0.994459	1.02377	0.99153	1.02925	1.02523	1.02339	1.02318
	1.36947	1.00874	1.01183	0.98279	1.00009	1.01066	1.00359	1.00386	1.01823	1.01938	1.01478	1.02345	1.00243	1.0038	0.994788	0.997097	1.01557	1.00342	1.00512	1.00262	1.01443	1.00562	1.0211	0.982429	1.02067	0.986282	0.985416	0.996451	0.997555	1.001	1.00504	0.999331	1.00472	1.00966	0.998992	0.995167	0.989265	1.02293	0.996332	1.0023	0.995988	1.00392	1.00368	1.02996	1.01661	1.02564	1.00568	1.01831	1.01492
	1.36936	1.01439	1.00669	0.998145	1.00916	1.01026	1.00676	1.01367	1.02615	1.01115	1.02709	1.02179	1.01238	1.00349	1.00792	1.00768	1.00556	1.00468	0.997745	1.00051	0.996734	0.997582	1.00025	0.99675	1.00251	0.994126	1.00601	1.00959	1.00541	0.994456	0.989361	0.996727	0.981045	1.01073	1.00052	1.00017	1.00274	1.00482	0.992651	1.00558	0.99413	1.01177	1.00244	1.00875	1.00286	1.0257	1.0244	1.01598	1.02374
	1.36924	1.00914	1.0091	0.98927	1.01358	1.02624	1.02582	1.00765	1.01848	0.998188	1.0079	1.01147	1.01778	1.00282	0.997129	1.00902	1.00124	1.00194	0.998873	0.994153	0.991026	0.99972	1.01391	1.00603	1.01258	1.00568	0.998926	1.01172	1.01225	1.00514	0.991431	0.997108	0.999592	0.986773	0.982368	1.00493	1.00879	1.01352	1.00717	0.994502	1.0022	1.01559	1.00754	0.99788	1.00552	1.01952	1.01303	1.03418	1.01827
	1.36912	1.01626	1.00192	1.00244	1.01311	1.00957	1.0075	1.01363	1.00761	1.00405	1.00185	1.03608	1.01948	1.01185	1.01203	0.995671	0.994252	1.00448	1.00204	1.00263	1.00294	0.996215	1.01172	0.988611	1.00172	0.991107	0.990544	1.00817	0.993438	0.995709	1.00442	1.00417	1.01308	0.992713	0.992104	0.996795	1.00518	1.00875	0.993341	1.01159	1.00534	1.0006	0.994862	1.01745	1.00298	1.03499	1.01215	1.01141	1.03079
	1.369	1.00246	1.00596	0.997684	0.994356	1.01399	1.01354	0.999565	1.02375	1.00332	1.00988	1.02841	1.00976	1.01235	0.99623	1.00532	1.01282	1.00419	1.00265	0.995193	1.00528	0.991152	1.02191	1.00723	1.01056	1.00754	1.00178	1.01253	0.987832	0.994013	1.00557	0.992378	0.994221	1.00176	0.986276	0.998007	0.991336	1.0189	0.994643	1.00771	0.990009	1.00928	1.0095	1.02317	1.01474	1.01419	1.01111	1.02768	1.02376
	1.36888	1.00456	0.993966	1.00078	1.00901	1.01796	1.01936	1.00705	1.01991	0.994129	1.00493	1.01876	1.01842	1.00397	0.997567	1.00129	0.997992	0.99636	1.01449	1.00432	0.990314	1.00634	0.99896	0.998829	1.00188	0.98942	0.994063	0.998914	0.99277	0.999022	1.0052	0.993837	1.01209	1.00365	0.978032	1.01473	1.00717	1.01056	1.01414	1.01781	1.0044	1.00689	1.00294	1.01837	1.01165	1.02835	1.01882	1.03152	1.01633
	1.36877	0.99294	1.00882	1.00741	1.00668	1.00494	1.01097	1.02191	1.01279	1.02371	1.00999	1.01196	0.996928	1.00837	1.00918	1.00529	0.996452	1.0069	1.00847	1.00399	1.01059	1.01456	0.988578	0.997671	1.00535	0.988357	0.995069	1.00527	0.996178	1.00346	0.991364	1.00935	1.00076	1.00189	0.989426	1.00095	1.00115	1.00845	0.996788	1.00558	1.00536	0.999845	0.989306	1.00398	1.00049	1.02003	1.02164	1.02082	1.02246
	1.36865	1.00527	1.00846	0.997922	1.00536	1.01053	1.0181	1.00324	1.02153	1.0107	1.00236	1.01296	1.01386	1.00632	1.01266	0.989162	1.01868	1.00922	1.00272	0.985955	0.991555	0.991111	1.00785	0.984491	1.01023	0.997317	0.985839	1.00668	0.9894	1.00352	0.99353	0.995417	1.00146	1.00212	0.99528	1.00938	0.994383	1.01711	1.01262	0.994751	1.00677	1.00621	1.00737	1.02895	1.01024	1.02662	1.01979	1.02852	1.01308
	1.36853	1.0095	1.01617	1.00029	1.00864	1.01512	1.01232	1.02305	1.03666	1.00909	1.01593	1.01667	1.00604	1.01032	1.01155	1.00842	0.996539	1.00327	1.00778	0.99745	1.0171	0.984324	1.00423	0.993531	0.991891	1.0077	0.993092	0.994716	0.985937	0.997152	1.00803	0.996904	0.992801	0.980409	0.988167	0.998363	0.999765	1.01247	0.991299	1.00799	1.00797	1.01104	0.99532	1.00781	1.005	1.02864	1.01269	1.00909	1.02151
	1.36841	1.01305	1.00135	1.00614	1.00648	1.01865	1.00711	1.00693	1.02816	1.01047	1.00384	1.0117	1.01232	1.01557	1.01621	1.01298	0.996454	1.00418	0.996997	0.998237	1.00943	0.99415	1.00944	1.00812	0.999779	0.995882	1.0086	1.00374	1.00501	0.997264	0.98976	1.00051	1.00348	0.998092	0.999503	1.00547	0.995639	1.00714	0.995592	1.00776	1.00897	0.999609	1.01227	1.01909	1.01615	1.03721	1.01651	1.00453	1.01694
	1.3683	1.00171	1.0147	0.993668	1.01561	1.02256	1.02149	1.01215	1.02436	1.0146	1.00819	1.02734	1.01191	1.01522	1.01186	1.00349	1.00936	1.01191	0.997371	0.995368	1.00074	0.997667	1.00454	0.99664	0.992902	0.991087	0.993211	0.999358	0.995521	0.997438	0.989646	0.98229	0.993732	1.011	1.00463	1.0047	1.00227	1.0102	0.995045	0.993089	1.01885	1.00426	0.990319	1.02455	1.00227	1.00527	1.01241	1.01069	1.02664
	1.36818	1.01347	0.998875	0.997638	1.01157	1.00209	1.02375	1.00601	1.01656	1.02232	1.01714	1.01573	1.01041	1.00017	1.00948	1.00168	1.0149	1.00284	1.00624	1.00226	0.998676	1.00494	0.99305	0.990194	0.979005	0.994668	0.996482	1.00112	0.99848	0.996814	0.991235	1.00663	1.00175	1.00732	0.984396	1.00571	1.00134	1.00664	1.0023	1.01918	1.00096	1.00769	0.994557	1.02359	1.00074	1.02172	1.0164	1.01957	1.02058
	1.36806	1.02023	1.01028	0.994208	1.01262	1.02256	1.00777	1.01015	1.02457	1.0009	1.00378	1.02889	1.02742	1.01245	1.00577	1.00322	1.00762	0.997868	0.998087	0.990883	0.99799	0.997054	1.0076	0.991149	0.998395	0.985323	0.995769	0.995473	0.994301	0.988306	0.986692	0.990236	0.993834	0.995306	0.993939	1.00558	0.997803	1.00439	1.01443	0.992945	1.0106	1.00963	1.00292	1.02729	1.00515	1.01578	1.00924	1.01531	1.02436
	1.36794	1.01412	1.00833	1.00528	1.01053	1.01226	1.02599	1.00674	1.03298	1.00631	1.00562	1.01378	1.01222	1.0065	1.01452	1.00579	1.00948	1.00972	1.00802	1.00026	1.00603	0.991613	0.997408	0.98649	0.995599	0.989534	0.983288	1.00593	0.994181	0.991851	0.994284	0.990186	1.00459	0.997664	0.992599	1.00401	1.00032	1.00198	1.00141	1.00493	1.0026	0.999449	1.01073	1.01212	1.00763	1.01808	1.02087	1.02327	1.01377
	1.36783	1.01716	1.00502	1.0014	1.01313	1.02623	1.01333	1.00918	1.02047	1.01119	1.00994	1.00797	1.0177	1.00864	1.00267	1.0014	1.0084	0.999702	1.01112	1.00463	1.0108	1.00679	1.00228	0.995377	0.994451	0.991216	0.998476	0.993255	0.997943	1.0034	0.980107	1.00071	0.989131	0.998338	0.991025	1.00154	0.986553	1.00302	1.00593	1.00733	0.995895	0.997162	1.00162	1.02261	1.00976	1.02746	1.02319	1.00988	1.02476
	1.36771	1.02086	1.01424	1.00282	1.01641	1.02708	1.01149	1.01722	1.0271	1.00739	1.02202	1.01823	1.00545	0.999881	1.01266	0.994517	0.999912	0.995694	0.992426	0.999995	0.990882	0.996885	0.997264	0.992202	0.98733	0.997637	1.00359	1.00417	0.986105	0.996103	0.987893	0.997542	1.00971	0.997627	0.994471	1.00592	0.992357	1.01216	1.00849	0.997176	0.994062	1.0046	0.995363	1.01665	0.991746	1.02022	1.00627	1.01878	1.01486
	1.36759	1.01244	0.991282	0.991314	1.00361	1.01666	1.00238	1.01165	1.01839	1.01157	1.01073	1.02696	1.01427	1.00274	1.01121	1.0006	1.01688	1.00731	0.990796	0.995277	0.997675	0.99621	1.00435	1.00172	0.999827	0.98129	0.993495	0.986062	0.996707	0.980022	0.985965	0.994965	0.996549	0.998659	0.987643	0.999076	1.00227	1.00605	0.997154	0.993135	1.00032	1.001	1.00669	1.01939	1.00714	1.02244	1.0217	1.02097	1.02693
	1.36747	1.00276	0.996848	1.00303	1.01778	1.01814	1.02249	1.00768	1.02253	1.01922	1.01592	1.02609	1.00887	1.0197	1.00452	0.999044	1.00491	1.00409	0.993088	1.00268	1.01308	0.999425	1.00016	0.986036	0.989477	1.00305	0.998246	0.993904	0.995759	1.00784	0.984742	0.998048	0.989366	0.996354	0.991594	0.997711	1.00416	1.00454	1.00686	1.00479	0.994324	1.00491	0.999344	1.00583	0.998365	1.01397	1.00984	1.0208	1.01672
	1.36736	1.0144	1.00243	1.00968	1.01265	1.01829	1.01398	1.00147	1.03182	1.01858	1.00263	1.02017	1.02769	1.01799	1.01068	1.00333	1.00856	1.00329	0.994446	0.998678	0.996633	0.985653	0.993449	0.997272	1.00342	0.979673	1.00067	1.00253	0.985645	0.993311	0.982627	0.978177	0.996598	0.977415	0.990494	0.993351	0.995151	0.998489	1.00008	1.01282	1.00613	0.995914	1.01043	1.00557	1.00236	1.017	1.00376	1.01806	1.00461
	1.36724	1.01996	1.01063	1.00345	1.00773	1.01847	1.02577	1.01509	1.03083	1.00796	1.02389	1.02386	1.02114	1.00511	1.00081	1.00335	1.00671	1.0034	1.00298	1.00348	1.00536	0.999953	1.00261	0.981679	1.01313	0.988205	1.00419	1.01052	0.979943	1.00268	0.998845	1.00705	0.982076	0.987672	0.998552	1.00864	0.993813	1.00426	0.995465	1.00619	1.00137	0.998154	0.991737	1.03362	1.01063	1.02507	1.02126	1.00352	1.01712
	1.36712	1.01269	1.01587	1.00555	1.00834	1.01489	1.01566	1.01029	1.02431	1.01787	1.01233	1.01418	1.01629	1.00567	1.01582	1.00262	1.01304	0.996599	1.00091	1.00243	0.992979	0.986928	0.997188	1.00021	0.997512	0.998785	0.995905	0.99305	0.992661	0.994172	0.98869	0.995949	1.00542	0.98593	0.98901	0.998361	0.9837	0.994035	1.00393	0.997752	1.01719	0.986604	0.996228	1.0301	1.0216	1.03041	1.01812	1.01081	1.03463
	1.367	0.998657	1.00247	1.00598	1.02755	1.01369	1.02105	1.0079	1.03515	1.02414	1.01127	1.02267	1.01954	1.00851	1.0062	1.00496	1.00024	1.00022	1.00882	1.0003	1.00392	1.00089	0.999761	0.995538	0.995832	1	0.989609	1.00538	0.978254	0.993829	0.993525	0.998733	0.999391	0.990728	0.992934	1.00558	1.00043	1.00064	0.998828	0.999649	0.998021	1.00154	1.00161	1.00926	1.00886	1.03334	1.02123	1.00534	1.02074
	1.36689	1.01467	1.01586	1.01486	1.00525	1.01905	1.01885	1.00205	1.01326	1.00353	1.01376	1.01071	1.01296	1.01497	1.01404	0.997664	1.00406	1.00003	0.998638	0.989674	0.999523	0.98651	0.994635	0.984959	0.980373	1.00387	0.989741	0.984241	0.985626	0.991964	0.995501	0.98093	0.995255	0.977951	0.984345	0.99707	1.0006	1.00471	1.00523	0.999627	1.01356	0.993475	1.00805	1.01558	1.0009	1.02539	1.01225	1.00707	1.01999
	1.36677	1.01752	1.01348	1.00504	1.01258	1.01766	1.01434	1.01953	1.01799	1.01434	1.01477	1.02331	1.00276	1.02068	1.0087	0.999649	1.02229	1.0011	1.01902	0.989045	0.998787	0.990357	1.00674	0.98776	0.985602	0.991825	0.990617	0.991659	0.985557	0.983551	0.991714	0.975999	0.995366	0.989466	0.991239	0.998786	0.99332	1.00145	0.992291	1.0019	1.0027	1.00049	1.00681	1.02087	1.00103	1.02339	1.01914	1.02612	1.00787
	1.36665	1.02135	1.00745	1.00308	1.00971	1.01208	1.01994	1.01806	1.0322	1.01004	0.991859	1.0043	1.02531	1.00934	1.0107	0.997727	1.00645	1.01084	0.995713	0.985365	0.987424	0.979218	0.996099	0.991417	0.99741	0.988715	1.0065	0.984418	0.992777	0.990239	0.995065	0.990607	0.993117	0.998283	0.992099	0.998883	0.985735	0.998204	1.00142	1.00215	1.00339	0.995827	1.00725	1.01711	1.01063	1.02109	1.02555	1.00583	1.01567
	1.36654	1.00955	0.995796	1.00064	1.0112	1.02102	1.01533	1.0035	1.03157	1.01844	1.01776	1.01201	1.01277	1.00902	1.00004	1.00199	1.00364	1.00017	0.985409	0.993857	0.996993	0.989104	0.997029	0.982314	0.999213	0.984019	0.990286	0.98461	0.977011	0.981975	0.999833	0.986063	0.989893	0.9899	0.986467	1.0045	0.99993	1.00672	0.994306	1.0027	1.00218	1.00883	1.0031	1.02797	1.01431	1.03114	1.01682	1.01205	1.02628
	1.36642	1.02767	1.01042	1.00455	1.00918	1.01962	1.0133	1.01812	1.02084	1.01441	1.00667	1.02206	1.00155	1.00447	0.999315	0.996882	0.990003	1.00299	0.994656	0.989497	0.999127	0.993636	0.997135	0.995078	0.988175	0.99472	1.00091	0.993314	1.00549	0.988591	0.997652	0.993696	0.983723	0.984001	0.975544	0.993403	1.0107	1.00128	0.997438	1.0152	1.00162	1.01677	1.00657	1.01378	1.00689	1.02421	1.01681	1.01687	1.01161
	1.3663	1.00684	1.01892	0.991598	1.00575	1.01667	1.02396	1.01771	1.02389	1.00714	1.02017	1.01717	1.01833	1.02352	1.00576	0.994168	1.00324	0.9907	0.998454	0.994197	0.98995	0.980501	0.996657	0.983719	0.987571	1.00165	0.985865	0.98362	0.994826	0.997384	1.00064	0.9829	0.985246	0.97937	0.975061	0.998575	0.992635	0.995239	0.999552	1.01261	0.99575	0.993165	0.995975	1.00945	1.01227	1.02829	1.00623	1.02825	1.02101
	1.36618	1.0091	1.00415	1.00232	1.01533	1.01667	1.02189	1.01925	1.01304	1.01445	1.02475	1.01984	1.00941	1.00721	0.999738	1.00607	1.01392	0.996122	1.00171	0.995296	0.99871	0.998633	1.00495	0.989196	1.00149	1.00044	1.00137	0.997269	0.992896	0.987252	0.998667	0.995633	0.992579	1.00881	1.00318	0.996027	0.992016	1.01146	1.00625	1.00789	1.00201	1.01289	1.00757	1.01846	1.00145	1.02868	1.01555	1.02031	1.01359
	1.36607	1.00771	1.01551	0.994561	1.00687	1.02374	1.02292	1.01876	1.0284	1.01256	0.999122	1.01739	1.02059	1.01045	1.0133	1.00127	0.986521	0.994384	1.0042	0.983447	0.983051	0.983924	0.990283	1.00286	0.978375	0.991075	0.976157	1.00374	0.979557	1.00566	0.994184	0.98623	0.99305	0.978052	0.990465	0.991533	0.985775	0.978793	0.98008	1.00569	1.00536	0.995778	0.999841	1.01258	1.00466	1.04122	1.01375	1.01731	1.01912
	1.36595	1.00897	1.01337	0.999375	0.997261	1.01837	1.00613	1.02402	1.02509	1.01567	0.993145	1.01644	1.01211	1.01448	1.01552	1.00175	1.01083	0.987154	0.991109	0.981594	0.999709	0.979696	0.982097	0.985761	0.997741	0.993726	0.990028	0.98992	0.989341	0.992697	0.992277	0.998455	1.00006	0.996722	0.979988	0.995868	1.00455	0.990498	0.988149	1.00512	1.00015	0.993512	1.00813	1.01742	1.01402	1.02774	1.02214	1.00875	1.00466
	1.36583	1.00959	1.00792	1.01227	1.01432	1.00975	1.01136	1.01392	1.02574	1.01337	1.00207	1.00743	1.0066	1.00449	0.992976	0.999337	1.02504	0.996146	0.996864	0.997645	0.982084	0.984439	0.994173	0.989503	0.979125	0.96917	0.981228	0.999665	1.00279	0.988966	1.00646	0.992767	0.98383	0.996071	0.981471	0.984804	0.980262	0.993764	0.976232	1.00218	1.00253	1.01116	1.01736	1.01991	1.0011	1.02331	0.999677	1.02221	1.02063
	1.36572	1.0113	0.986946	1.01303	1.00764	1.01613	1.03725	1.01235	1.01646	1.00899	1.01784	1.00678	1.01366	1.01636	0.998421	1.00395	0.986841	0.986737	0.987215	1.00076	0.993299	0.989917	0.982907	0.997019	0.998206	0.981511	1.00279	0.994064	0.990377	0.988425	0.993302	0.98536	0.99468	0.996068	0.98974	0.981143	0.996001	0.993254	0.989833	1.00103	0.97984	1.00411	1.00409	1.02285	1.01146	1.01344	1.02629	1.01095	1.01494
	1.3656	0.993099	1.0118	1.0078	1.00195	1.01115	1.01006	1.01196	1.04323	1.00795	1.01185	1.0106	1.01935	1.01451	0.994463	0.987354	0.994773	0.994492	0.98134	1.00463	0.993755	0.992917	0.994031	0.975101	1.00126	0.982364	0.991666	0.992623	1.00661	0.97816	0.995956	0.987975	0.985401	0.981493	0.977807	0.985881	0.984978	1.00456	0.991897	1.00389	1.00416	1.00507	0.998617	1.00458	1.00427	1.03396	1.02391	1.01201	1.01164
	1.36548	1.01076	0.99843	1.01505	1.01274	1.02036	1.01496	1.02277	1.02723	1.01048	1.00031	1.02325	1.01012	1.0129	1.01363	1.00348	0.992277	1.00042	0.984591	0.99227	0.987028	0.987286	0.988183	0.97416	0.994623	0.99198	0.995189	0.985949	0.996844	0.987889	1.00706	0.997399	0.990928	0.985436	0.996564	0.995599	0.986404	1.00231	0.996266	0.990978	1.00334	1.00662	0.993629	1.0069	1.00869	1.03475	1.01848	1.01433	1.01947
	1.36536	1.01205	1.0078	1.00822	1.00556	1.01173	1.02063	1.01239	1.03835	1.02327	1.00371	1.01497	1.01407	1.00693	1.01621	1.0075	1.00438	0.989545	0.982805	0.987738	1.00414	0.979769	1.00912	0.998517	0.98355	0.990634	0.994706	0.98565	1.00112	0.989576	0.99649	0.99353	0.987536	0.995541	0.983146	0.988361	0.980083	0.994177	0.983372	1.01265	1.00181	1.0032	0.990614	0.996961	1.01702	1.04544	1.01264	1.01507	1.01491
	1.36525	1.01238	1.01156	1.01849	1.00875	1.02886	1.01851	1.00701	1.03076	1.01101	1.00421	1.01766	1.00576	1.0189	0.997594	1.00949	1.00245	1.00178	0.981045	0.983147	0.978988	0.996653	0.983598	0.981742	0.98311	0.99486	0.996411	1.00819	0.994031	0.992463	0.988096	0.999762	0.979808	0.991355	0.987937	0.992611	0.984936	0.993188	0.984044	0.982117	1.00656	0.989646	0.987332	1.00569	1.00072	1.03395	1.01913	1.02109	1.00719
	1.36513	1.01217	1.00364	0.996778	1.00919	1.02296	1.02135	1.00691	1.0105	1.0096	1.02004	1.01564	1.00849	1.00687	1.00588	1.00848	0.998752	0.995022	0.993759	1.00194	0.994936	0.987357	1.00631	0.984065	0.99538	0.982407	1.00176	0.989617	0.989548	0.993714	0.994047	0.993901	1.00373	0.996073	0.999671	0.987208	0.975868	1.00208	1.00743	1.00838	1.00741	0.997397	1.00968	1.01479	1.01591	1.01019	1.0251	1.01999	1.01611
	1.36501	1.01905	1.01395	1.01472	1.01325	1.00642	1.01476	1.01768	1.01899	1.00534	0.993908	1.01273	1.00897	1.01738	1.00848	1.00832	0.99329	1.00475	0.976298	0.994958	1.00223	0.979071	0.98588	0.960217	0.988241	0.987114	0.987136	0.989032	0.983573	0.993935	0.97925	0.992667	0.99878	0.980556	0.985333	0.980419	0.980236	1.01198	0.981813	0.991298	0.997938	0.997148	0.994077	1.01743	1.00669	1.01278	1.0113	1.01322	1.02038
	1.3649	1.00619	1.01092	1.00539	1.02664	1.02035	1.00581	1.01469	1.02509	1.01638	1.02346	1.02153	1.00419	1.00496	1.00297	0.988225	1.00692	0.990026	0.997549	0.984204	0.993724	0.977901	0.996905	0.986063	1.00699	0.992267	0.98844	0.986963	0.990275	0.993366	0.991717	0.984586	0.993757	0.975048	0.975603	0.99323	0.993445	0.991566	0.993853	0.996101	1.00286	0.999974	0.998877	1.01583	1.00006	1.02604	1.01268	1.01815	1.02819
	1.36478	1.01135	1.01146	1.00907	1.01871	1.01771	1.01484	1.01315	1.01683	1.01655	1.00782	1.01379	1.01305	1.00363	1.01232	1.00558	1.0024	0.998264	0.983408	0.976976	0.987827	0.98611	1.00641	0.98916	0.995055	0.998791	0.974934	0.990083	0.985502	1.00422	0.989684	0.986509	0.975353	0.988733	1.00002	0.982689	0.989859	0.996497	0.983602	0.985855	1.00258	1.00508	0.995717	1.02596	1.00015	1.02373	1.0159	1.01724	1.00664
	1.36466	1.00838	1.01476	1.00215	0.997583	1.02594	1.02547	1.00518	1.02319	1.01957	1.01284	1.00927	1.01044	1.01809	1.0112	0.989521	1.00458	0.994836	0.992776	0.981914	0.994326	0.99039	0.997903	0.976578	0.99147	0.980295	0.993564	0.998555	0.976646	0.992326	0.983291	0.981992	0.99505	0.989008	0.983234	0.984634	0.988398	0.988489	0.997857	0.998243	1.00953	1.01361	0.99679	1.02198	1.00744	1.01531	1.0085	0.995999	1.01189
	1.36455	1.02499	1.01611	1.0063	1.02285	1.02503	1.0256	1.01118	1.02624	1.00919	1.00511	1.00523	1.01037	1.00391	1.00031	0.989407	0.989563	0.991126	0.978138	0.997195	0.980446	0.993324	0.989193	0.981216	0.988993	0.991478	0.977705	0.999154	0.974769	0.980254	0.985788	0.994989	0.977332	0.991816	0.989001	0.992521	0.987011	0.998665	0.990816	1.00233	0.9986	1.00432	1.00165	1.00663	1.01139	1.02137	1.02105	1.0211	1.02611
	1.36443	0.998475	1.01756	0.999768	1.01894	1.00765	1.01153	1.0201	1.01536	1.02173	1.01016	1.00449	1.01011	1.01454	1.01246	1.00524	1.00724	1.00559	1.00187	0.98221	0.985199	0.969481	0.990085	0.99056	1.00906	0.988558	0.98763	0.98293	0.996904	0.990129	0.982859	0.983891	0.996735	0.995994	0.979918	0.990493	0.982161	0.996683	0.995234	0.980874	0.997985	0.99258	1.00438	1.01284	1.00433	1.03153	1.01484	1.0159	1.01676
	1.36431	1.01922	1.02474	1.00206	1.0161	1.01379	1.01869	1.01511	1.02066	1.02018	1.0097	1.00778	1.00743	1.00482	1.00846	1.0072	0.994374	0.991238	0.985942	0.973479	0.989575	0.986061	1.00095	0.980624	0.990576	0.987779	0.992552	0.994521	0.984886	0.990607	0.983391	0.997233	0.99903	0.977876	0.984776	0.992475	0.992312	1.00264	0.990579	0.997015	0.983174	1.00472	1.00233	1.01964	1.00122	1.03764	1.01497	1.00755	1.01904
	1.36419	1.01112	1.00308	1.00132	1.0136	1.01048	1.00932	1.01475	1.02865	1.01291	1.00451	1.01438	1.01132	1.00844	0.995471	1.00332	0.98893	0.987235	0.981573	1.0015	0.987519	0.99731	0.99025	0.994788	0.990533	0.979886	0.981482	1.00202	0.990984	0.999157	0.990992	1.00074	0.99118	0.987759	0.990675	0.991956	0.985621	0.997711	0.981456	1.00259	0.997455	0.999179	1.00915	1.00572	0.995802	1.0198	1.01637	1.01626	1.01212
	1.36408	1.01288	1.01625	1.00646	1.01928	1.02162	1.02539	1.01329	1.02615	1.01436	1.00422	1.00744	1.0096	1.01471	0.993153	0.990785	0.987348	1.00207	0.986032	0.987994	0.99889	0.991337	0.989049	0.980576	0.992826	0.994409	1.0055	1.00398	1.00848	0.992073	0.979508	0.993131	0.986663	0.987642	0.977834	0.987753	0.990625	0.987342	0.988973	1.00497	0.994662	0.999636	1.00772	1.00583	0.987889	1.01627	1.01594	1.01751	1.01176
	1.36396	1.00002	1.00038	0.992763	1.01207	1.0133	1.01664	1.01504	1.004	1.01249	1.0094	1.00454	1.00959	1.00817	1.00768	1.0022	0.994993	0.985938	0.98755	0.981942	0.991912	0.988694	0.995521	0.98662	0.99645	1.00103	0.99345	0.987348	0.989036	0.992148	0.989571	0.988551	0.992884	0.987762	0.987352	0.987501	0.998823	0.998689	0.989755	0.984434	1.0032	0.985766	0.991871	1.02148	1.00142	1.02149	1.02072	1.0047	1.0222
	1.36384	1.00841	1.01152	0.996371	1.01948	1.01219	1.02533	1.01541	1.03026	1.02573	1.01845	1.01253	1.00988	1.00948	1.00575	0.998236	0.9999	0.994791	0.991689	0.985877	0.993899	0.993441	0.993125	0.994743	0.980857	0.987293	0.989585	0.992628	0.992376	0.996529	0.976359	0.992566	0.997321	0.979658	0.994367	0.981744	0.986156	0.99648	0.983197	1.00665	0.995639	0.991488	1.00606	1.01139	1.00642	1.00829	1.01837	1.01059	1.01219
	1.36373	1.00549	1.01404	1.01342	1.01861	1.02635	1.03367	1.01064	1.02374	1.01447	1.00611	1.00977	1.01978	1.00318	1.01508	0.994197	0.989865	0.991752	0.985808	0.995481	0.992323	0.984996	0.9928	0.993595	0.989832	0.998374	1.01011	0.985124	0.985409	0.986753	0.987417	0.978383	0.986333	0.989773	0.984129	0.992683	0.989699	0.990743	0.989878	0.98305	0.988831	0.998891	1.00206	1.00557	1.0024	1.01975	1.00862	1.01297	1.01294
	1.36361	1.02187	1.00889	1.01278	1.01887	1.01009	1.01703	1.00856	1.0404	1.02371	1.02243	1.01658	1.01833	1.01464	1.00477	0.988783	0.991126	0.993879	0.988464	1.00056	0.97912	0.987297	0.987687	0.992593	1.00319	0.987976	0.981887	0.986674	0.989716	0.982256	0.989602	0.984426	0.987958	0.979114	0.987578	0.993616	0.992842	0.989653	0.997797	0.982263	1.00104	0.986679	0.993329	1.00255	1.00419	1.02703	1.02682	1.01455	1.02251
	1.36349	1.01648	1.01261	1.01156	1.01368	1.01845	1.01476	1.00418	1.02567	1.0041	1.00728	1.01728	1.00299	1.02041	1.00124	0.993363	0.998143	0.995258	0.97893	0.980059	1.00198	0.994197	0.990746	0.981143	1.00261	0.994824	0.989331	0.993114	0.982432	0.988849	0.989099	0.982254	0.980549	0.996234	0.99519	0.9913	0.993281	0.989315	0.984893	0.98851	0.988172	0.986895	0.996303	1.01755	1.00782	1.01024	1.01842	1.02197	1.01252
	1.36338	1.00196	1.01651	1.01155	1.02235	1.02189	1.0131	1.01259	1.02387	1.01509	1.01937	1.01977	1.00153	0.998442	1.00489	0.992621	1.00812	0.992242	0.98935	0.992233	0.98812	0.982583	1.00303	0.998516	0.998617	0.984969	0.987925	0.980264	0.98815	1.00519	0.983507	1.00649	0.995569	0.986946	0.987109	0.991767	0.982615	0.990171	0.997851	0.998844	0.993853	0.97984	0.989652	1.00992	1.00915	1.00627	1.01866	1.00757	1.00455
	1.36326	1.01866	1.00126	1.00659	1.00772	1.0213	1.01816	1.0192	1.0281	1.01468	1.01956	1.02582	1.00427	1.00903	1.01139	0.99987	1.00527	0.98853	1.00144	0.978057	0.99533	0.98073	0.990904	0.987524	0.986067	0.995627	0.998889	1.00189	0.988785	0.998995	0.998943	0.991429	0.971608	0.988533	1.004	0.982134	0.99501	0.983551	0.984743	0.993702	0.994734	1.00473	0.989267	0.995193	1.00008	1.01985	1.00729	1.00571	1.02828
	1.36314	1.00595	1.00984	1.01754	0.996789	1.02779	1.02724	1.00202	1.02608	1.01128	1.01382	1.01661	1.01215	0.99547	0.995458	0.993496	0.990906	0.984074	0.989863	0.986453	0.995374	0.984164	1.00583	0.977059	0.991085	0.990436	0.981666	0.990896	0.992419	0.990044	1.00153	1.00147	0.982481	0.976254	0.98123	0.987811	0.986885	0.993491	0.984352	0.993676	0.993603	0.985735	0.998471	1.01052	1.0014	1.02404	1.01349	1.01849	0.999339
	1.36303	1.01474	1.01702	1.01119	1.01999	1.02923	1.02736	1.00755	1.01949	1.01668	1.02182	1.00978	1.01659	1.01213	1.00109	1.00159	0.980032	0.981981	0.983172	0.982651	0.988575	0.980162	0.990639	0.999486	0.997505	0.997235	0.984719	0.995022	0.984388	0.984573	0.997345	0.998229	0.987253	0.987558	0.988023	0.99513	0.994082	0.992019	0.997696	0.98881	0.9804	0.991688	1.00072	1.00073	1.00495	1.02501	1.00044	1.00905	1.01689
	1.36291	1.01161	1.00917	1.01397	1.00361	1.02648	1.01708	1.01779	1.01966	1.00353	1.0102	1.00814	1.00013	1.00057	0.992046	0.995568	0.999215	0.990304	0.977973	0.981548	0.992637	0.985045	0.992921	0.990378	0.989792	0.975817	0.983616	1.00286	0.989473	0.998566	0.999318	0.979594	0.9747	0.978829	0.984588	0.997767	0.99097	0.985608	0.984253	0.978835	0.992477	0.993217	0.992436	1.01574	1.00362	1.01839	1.02665	1.02488	1.00736
	1.3628	1.00717	1.00708	1.00639	1.00786	1.00489	1.01827	1.01674	1.02737	1.0154	1.00192	1.01632	1.00226	1.00366	0.99915	0.996532	0.983901	0.99879	0.98704	0.990618	0.994295	0.996641	0.992603	0.979091	0.986108	0.995615	0.992167	1.00003	0.98422	0.985453	0.987981	0.994168	0.996988	0.988085	0.969758	0.990191	1.00344	0.990421	0.988914	1.00497	0.986089	1.00199	0.989345	1.00515	0.993543	1.01341	1.02751	1.01426	1.0214
	1.36268	1.00953	1.00312	1.00705	1.00555	1.01311	1.01943	1.0273	1.03735	1.01873	1.00218	0.996784	1.00099	1.01308	1.00885	0.986823	1.00384	0.99218	0.98118	1.01234	0.99197	0.993488	0.990853	0.999555	0.985991	0.972247	0.986652	0.989361	0.974343	0.985335	0.990901	0.988327	0.991789	0.991741	0.979857	0.992426	0.979694	0.981512	0.981069	0.981565	0.990413	1.00141	0.990764	1.00465	1.00586	1.02664	1.01496	1.0195	1.00866
	1.36256	1.01216	1.00309	1.01762	1.01015	1.02491	1.00646	1.01552	1.03183	1.0149	1.01484	1.01771	0.999611	0.998988	0.993246	0.992165	0.998216	1.00517	0.991397	0.988936	0.98686	0.995838	1.001	0.973633	0.984226	0.985903	0.986606	0.996051	0.996154	0.981014	0.974811	0.972251	0.992104	0.977401	0.980241	0.989805	0.976816	0.997217	0.98995	0.973335	1.00029	0.996791	1.00589	1.02944	1.00136	1.02804	1.00514	1.01285	1.00628
	1.36245	1.01732	1.01338	1.0152	1.01097	1.029	1.01481	1.01298	1.01822	1.0049	1.00098	1.00742	1.01637	1.00309	1.00719	0.993965	0.994128	0.997411	0.990733	0.983868	0.996507	0.991844	0.987515	0.997372	1.01246	0.970837	0.980862	0.986963	0.980991	0.989574	0.993606	0.984045	0.9933	0.997797	0.999616	0.983313	0.99892	0.977991	0.969717	0.99988	0.99266	0.99161	0.990154	1.00996	0.999831	1.01772	1.01262	1.016	1.03155
	1.36233	1.01094	1.00881	1.00115	1.01199	1.03066	1.02301	1.01087	1.02482	1.00893	0.999227	1.01467	1.00937	1.00891	1.0035	0.980606	0.991166	0.99176	0.981645	0.982065	0.984976	0.981969	0.987573	0.991234	0.988041	0.994729	0.99608	0.98516	0.989003	0.974913	1.01376	0.985985	0.991599	0.990487	0.991473	0.994647	0.996005	1.0017	0.99134	0.991671	0.991667	0.975442	1.00711	1.00354	1.01246	1.03071	1.01992	1.01115	1.02127
	1.36221	1.01529	1.01258	1.01309	1.00942	1.02866	1.02542	1.02368	1.03159	1.01722	1.01063	1.0164	1.00697	1.00419	1.01303	1.00039	0.993018	0.994989	0.998181	0.991193	0.99042	0.989674	0.996384	0.990811	0.995016	0.992924	0.993487	0.984598	1.00641	0.977809	0.973088	0.974909	0.992605	0.976104	0.985097	0.984405	0.987811	0.995096	0.98927	1.00049	0.980752	0.992311	1.00124	0.986007	0.997149	1.01936	1.00526	1.00066	1.01918
	1.3621	1.014	1.02113	1.01055	1.01582	1.00921	1.03075	1.01197	1.03265	1.0004	1.01941	1.00518	1.00234	0.998245	1.00413	0.990625	0.979749	0.985732	0.989712	1.00087	0.99278	0.983981	0.992948	0.968213	0.983962	0.984393	0.998066	0.983364	0.97482	0.980648	0.98739	0.985972	0.994726	0.996989	0.994371	0.978252	0.982695	0.996719	0.987267	0.974732	0.978833	0.98886	0.987125	1.01828	1.00853	1.01655	1.01428	1.00682	1.02359
	1.36198	1.01748	1.01725	1.01424	1.0157	1.01883	1.01023	1.00896	1.01505	1.0056	1.01249	1.01161	1.00662	1.0103	1.00973	0.98744	0.997839	0.99557	0.992603	0.997991	0.992267	0.980564	0.976593	0.984365	0.999052	0.986741	0.996905	0.996246	0.987804	0.98964	0.987494	0.979126	0.991684	0.984053	1.00492	0.983618	1.00827	0.994411	0.984465	0.99358	0.982155	0.999011	0.983673	1.0224	0.989802	1.02114	1.0083	1.01595	1.02409
	1.36186	1.00596	1.01085	1.00833	1.021	1.02611	1.00617	1.01964	1.02262	1.02319	1.01409	1.01823	1.00658	1.01033	1.00627	0.993454	0.999863	0.992601	0.989846	0.988468	0.993843	0.986247	0.995873	0.985634	0.995172	0.980926	0.994077	1.0081	0.998689	0.993763	0.984116	0.992185	1.00161	0.978768	0.99483	0.990675	0.984966	1.01136	0.995791	0.995117	0.99442	0.987863	0.990502	1.00446	0.998634	1.01093	1.01699	1.002	1.01214
	1.36175	1.00037	1.00833	1.00308	1.02391	1.03291	1.01793	1.00439	1.0257	1.00861	1.00468	1.01442	1.01063	1.0028	0.99292	1.00038	0.991784	0.989213	0.981974	0.981804	0.968394	0.977883	0.988959	0.982456	1.00367	1.00345	0.986393	1.01503	1.00052	0.9886	1.00629	0.994679	0.990206	0.97466	0.988302	0.982339	0.990968	1.00404	0.982109	0.992532	0.995512	1.00891	0.987876	1.01119	1.0113	1.00164	1.00427	1.01037	1.01539
	1.36163	1.00575	1.01105	1.00796	1.01948	1.01851	1.02952	1.02689	1.01696	1.01277	1.01137	1.01739	1.00937	0.99508	0.97918	0.988772	0.981496	0.989311	0.978057	0.986846	0.99155	0.972756	1.00603	0.989117	0.995344	1.00083	1.00891	0.995515	0.976228	0.989552	0.994688	0.986328	0.98286	0.98355	0.993166	0.989549	0.984912	0.988377	0.984768	1.00496	0.983207	0.999087	1.00881	1.01064	1.01246	1.02107	1.01349	1.02729	1.01667
	1.36152	1.01868	0.997357	1.00695	1.01287	1.02137	1.01214	1.0192	1.02311	1.02548	1.0196	0.999045	0.997822	1.00471	0.987041	0.982907	1.01187	0.992338	0.989585	0.983254	1.00041	0.986424	0.99762	0.981144	0.998728	0.992464	0.999376	0.993287	0.990982	0.989387	0.994233	0.986869	1.00407	0.97695	0.99171	0.986735	0.99528	0.997643	0.986115	0.982924	0.987357	0.985793	0.992178	0.996956	1.00129	1.01554	1.00764	1.01546	0.999981
	1.3614	1.0159	1.01172	0.999869	1.01163	1.02924	1.02267	0.992161	1.01777	1.01353	1.00604	0.999651	0.997744	0.999832	0.989763	0.989597	0.98082	0.984184	1.00231	0.980076	0.984609	0.981716	0.995098	0.983427	0.999943	0.996126	0.993074	0.995769	0.973067	0.983038	0.992823	0.991556	1.00313	0.992165	0.987722	0.989943	0.994257	0.988875	0.979314	0.991819	0.989029	0.983329	0.990339	1.00498	1.00045	1.0122	1.019	1.01102	1.01187
	1.36128	1.01753	1.00797	1.01238	1.01977	1.01581	1.01507	1.01572	1.02287	1.01395	1.00514	1.00116	1.00449	0.990581	0.996344	0.997686	0.996999	0.989964	0.988831	0.986457	1.00234	0.983203	0.998604	0.987149	0.998297	0.996445	0.99584	0.995954	0.991111	0.984376	1.01046	1.00294	0.999445	1.00417	0.993327	0.983269	1.00045	1.0001	0.982062	0.997529	0.988688	0.996185	0.978989	1.00042	1.00392	1.00294	1.01474	1.01364	1.01067
	1.36117	1.00429	1.01649	1.01466	1.01261	1.02702	1.02963	1.01439	1.01197	1.0009	1.00933	1.01188	1.0008	0.989841	1.00562	0.992897	0.990559	0.988668	0.990247	0.992063	0.987924	0.97082	0.993224	0.999599	0.995223	0.997406	0.997803	1.00149	0.982278	0.974787	0.984634	0.989951	0.999055	0.983831	0.983973	0.985109	0.989082	1.0024	0.997528	0.996701	0.979344	0.992736	1.00613	0.993981	0.998288	1.02467	1.01075	1.01151	1.02504
	1.36105	1.02099	1.00271	1.0061	1.00916	1.02019	1.01542	1.00849	1.01372	1.01803	1.0101	1.00756	0.999911	0.998654	0.997744	0.992543	0.991636	0.99421	0.997841	0.982623	0.977186	0.997335	0.996507	0.989356	0.978563	0.984522	0.978723	0.993323	0.971157	0.979098	0.971398	0.99755	0.987706	0.98951	0.975919	0.986065	0.983541	0.985127	0.988141	0.993045	0.991161	0.986284	0.990584	0.985908	0.993151	1.0046	1.0322	1.00942	1.03157
	1.36093	1.0118	1.02728	1.02362	1.01221	1.03285	1.02306	1.01218	1.0279	1.01343	1.02046	1.01336	0.999336	0.988817	1.00476	0.990121	0.995976	1.00823	0.997745	0.984694	0.977532	1.00656	0.988445	0.984578	0.986598	0.982821	0.984352	0.98705	0.992889	0.983216	0.989909	0.97908	0.98737	0.98577	0.983095	0.98569	0.974296	0.981781	0.998054	0.98192	0.986455	0.988756	0.988434	1.00789	1.00338	1.00614	1.01548	1.01473	1.00322
	1.36082	1.01599	1.0246	1.01741	1.01693	1.02574	0.999429	1.01551	1.02473	1.00952	1.01431	0.993618	1.00203	0.9964	0.985543	0.987803	0.996497	0.989503	0.985686	0.982546	0.992167	0.994774	0.986528	0.996955	0.992814	0.984781	0.979653	0.993118	0.983265	0.979984	0.98047	0.989634	0.985843	0.98834	0.995267	0.995742	0.989011	0.993408	0.981663	0.993395	0.984175	0.986083	0.991781	1.00087	0.999062	1.01476	1.00779	1.0179	1.00817
	1.3607	1.01481	1.01489	1.00139	1.02182	1.01645	1.01648	1.01341	1.01253	1.01613	1.00477	1.00058	1.0026	1.00854	1.0144	0.984639	0.998826	0.989318	0.990094	0.984633	0.990156	0.986971	0.990527	0.995499	0.99455	0.990906	0.986733	0.990232	0.988814	0.97416	0.972594	0.976295	0.977034	0.99229	0.987055	0.990258	0.986378	0.996125	0.98273	1.00259	0.998258	0.990745	0.986728	1.00436	0.98707	1.00698	1.0073	1.00596	1.01977
	1.36059	1.00928	1.01593	1.00094	1.01377	1.04237	1.00925	1.02465	1.0325	1.00967	1.01523	1.00332	0.99684	0.991513	0.998246	1.01031	0.986425	0.974035	0.992655	0.986961	0.99995	1.00373	0.987747	0.982566	0.996655	0.978012	0.994458	0.981484	0.980265	0.992793	0.979881	0.979076	0.981067	0.983615	0.993952	0.993775	0.991578	0.977975	0.991644	0.987808	0.97465	0.99445	0.977453	1.00508	0.994011	1.0132	1.00033	1.0043	1.0042
	1.36047	1.02549	1.0003	1.02006	1.01081	1.02547	1.02037	1.00901	1.01365	1.00819	1.0109	1.00274	1.00204	0.99758	0.994178	0.999348	0.998532	1.00157	0.985806	0.978444	0.991318	0.990724	1.00464	0.991895	0.984678	0.997897	0.982471	0.988574	0.984069	0.977897	0.987159	0.994363	0.983545	0.993263	0.979813	0.993342	0.988195	0.98055	0.991407	0.990755	0.973318	0.989447	0.989951	1.00265	0.996144	1.02059	1.00426	1.01168	1.01555
	1.36035	1.0175	1.01222	1.0062	0.997425	1.02222	1.01855	1.002	1.01763	1.00721	1.01678	1.00899	0.999417	0.993872	0.9991	0.987196	0.998021	0.98278	0.985892	0.993543	0.990985	0.990837	0.989306	0.98128	0.984806	0.989895	0.979811	0.984381	0.992125	0.991527	1.01088	0.975475	0.98443	0.987586	0.989057	0.996497	1.00137	0.989964	0.985414	0.980373	1.00073	0.997098	0.985503	1.00223	0.993696	1.00957	1.01686	1.0042	1.01626
	1.36024	1.01695	1.00122	1.01084	1.01408	1.01993	1.0024	1.01465	1.0235	1.01117	1.0107	1.00449	0.989104	0.989283	0.994979	0.998116	0.983384	0.994902	0.998715	0.981292	0.983289	0.993577	0.981745	0.992012	0.993128	0.981916	1.00359	0.998705	0.977414	0.999031	0.997126	0.988367	0.973262	0.98721	0.989606	0.990982	0.985531	0.98753	0.999634	0.989464	0.992403	0.992812	0.985388	1.02553	0.995424	1.00421	1.00426	0.996691	0.998491
	1.36012	1.01117	1.01439	1.01712	1.00757	1.01221	1.02671	0.998886	1.01261	1.01227	1.01108	1.00313	1.01611	0.996329	1.00186	0.998213	0.994185	0.993512	0.99436	0.966978	0.993349	0.992145	0.988116	0.974377	0.976135	0.992246	1.00469	0.989624	0.98511	0.999454	0.99686	0.987685	0.983437	0.975065	0.984341	0.988367	1.00014	0.994995	0.982875	0.995688	0.985671	0.987461	1.0003	1.00235	1.00036	0.999451	1.00526	1.00673	1.01333
	1.36001	1.00887	1.00965	1.00857	1.00104	1.01755	1.01511	1.01708	1.02659	1.01064	1.00278	1.00131	0.993348	0.989366	0.987067	1.0012	0.993006	0.986062	0.986809	0.97633	1.00147	0.978846	0.984422	0.976828	0.985201	0.995641	0.98991	0.996959	1.0007	0.992943	0.989814	0.991195	0.991865	0.986123	0.988981	0.991012	0.981555	0.987027	0.991612	0.982449	0.981198	0.996133	0.993214	1.00664	0.996413	1.01991	1.01132	1.00859	1.01073
	1.35989	1.00733	1.01638	1.00576	1.00861	1.0209	1.01408	1.01433	1.02358	1.01663	1.00701	1.00465	1.00375	0.992255	0.986791	0.989376	0.991135	0.984296	0.985302	0.99344	1.00096	0.977718	0.993697	1.00248	1.00751	0.993329	1.00289	1.00374	0.992738	1.00018	0.992255	0.991649	0.978585	0.976277	0.970146	0.981577	0.991964	0.995986	0.986425	0.991006	0.988848	0.982351	0.998837	0.991189	0.9985	1.009	1.0192	0.992858	1.02257
	1.35977	1.01364	1.00799	1.00857	1.01038	1.0179	1.00411	1.01782	1.01821	1.0078	1.01313	1.00481	0.998989	0.983459	0.985327	0.986006	0.985379	0.993085	0.98714	0.977073	0.988486	0.992031	0.993747	0.990781	0.994733	1.00328	0.990094	0.996361	0.997552	0.99136	0.989519	1.00852	1.00156	0.977693	0.9777	0.985675	0.99611	0.986162	0.977519	0.990521	0.998496	0.994558	0.976814	1.00159	0.999601	1.01074	1.00198	1.01231	1.0386
	1.35966	1.01293	1.0207	1.00001	1.01372	1.01739	1.01067	1.00572	1.01632	1.00485	1.00234	1.00167	0.997922	0.998268	0.996282	0.991768	0.982851	0.984651	0.988988	0.979784	0.993112	0.966331	1.00608	0.987488	0.999933	1.0034	0.995701	0.986557	0.988078	0.994552	1.00437	0.98328	0.983164	0.980858	0.975876	0.987248	0.982907	0.980588	0.978761	0.995846	0.988797	0.987396	0.988901	1.00491	0.994537	1.00525	0.997928	1.01199	1.02497
	1.35954	1.02038	1.01149	1.00427	1.02068	1.02529	1.02076	1.0153	1.01001	1.00354	0.997437	0.987441	1.00882	1.00224	0.9947	0.982096	0.983819	0.988891	0.992263	0.992409	0.997313	0.983176	0.985716	0.984321	1.00089	0.990646	0.994697	0.990451	0.988272	0.988306	0.996973	0.99246	0.979496	0.998	0.992252	0.99456	0.974101	0.995669	0.986987	0.993221	0.987643	0.989776	1.00419	0.994966	1.00333	1.01389	1.0013	1.00938	1.0211
	1.35943	1.0158	1.01356	1.018	1.0113	1.01521	1.00673	1.01197	1.01888	1.00712	1.00213	0.991171	0.996822	0.993343	0.993268	0.987587	0.987444	0.991897	0.989454	0.990338	0.981056	0.964949	0.991961	0.98548	1.00186	0.986293	0.99643	0.983661	0.987485	0.975534	0.994891	1.0012	1.00413	0.989276	0.989435	0.986658	0.973907	0.998788	0.995879	0.976316	0.984688	0.994697	0.988241	0.986713	1.00073	1.01049	1.00601	1.01347	1.02435
	1.35931	1.00996	1.02286	1.02193	1.01268	1.02511	1.01374	1.00225	1.01596	1.00758	1.01504	0.997705	0.992247	0.992428	0.993605	0.99882	0.998001	0.99125	0.998988	0.994617	0.979745	0.986546	0.985836	0.985771	0.986726	1.001	0.99846	0.99434	0.978504	1.004	0.993672	0.99993	0.992264	0.99049	0.997097	0.976354	0.975509	0.987784	0.981016	0.987109	0.978343	0.99262	0.983539	1.00048	0.99267	0.999435	1.00019	0.999613	1.0115
	1.35919	1.01115	1.01215	1.01055	1.01745	1.0197	1.03251	1.00315	1.03146	0.996428	1.00794	0.988144	1.00273	0.987367	1.00747	1.00699	0.989051	1.00263	0.997178	0.985437	0.976816	1.0066	1.00328	1.00155	0.994212	0.999784	0.996024	0.988769	1.00117	0.992161	0.982233	0.993862	1.00241	0.991715	1.00042	0.989046	0.977864	0.991224	0.982356	0.992927	0.981834	0.989379	0.99445	1.00225	0.989321	1.00282	1.0009	0.988886	1.01553
	1.35908	1.01132	1.01298	1.01258	1.01018	1.02888	1.01882	1.01669	1.01664	1.00924	1.00752	1.00647	0.999811	0.988439	0.992073	0.989981	1.00106	0.99599	0.993224	0.99203	0.998646	0.983635	1.00379	0.985829	0.996052	0.985682	0.994228	0.987695	0.995983	0.975213	0.998204	0.979681	0.97852	0.989071	0.988124	0.990181	0.979706	0.986584	0.982283	0.969842	0.9787	0.992747	0.977805	1.0026	1.00556	1.01362	0.995746	0.992172	1.0119
	1.35896	1.01868	1.01414	1.01105	1.0183	1.01984	1.01085	1.01317	1.02252	1.00648	1.00854	1.00136	0.998557	0.995235	0.998847	0.986576	0.990349	0.989488	0.989744	0.992408	0.997942	0.981687	1.00248	0.988764	0.993159	0.980193	0.987417	0.979588	0.973913	0.997087	0.994035	0.997181	0.990074	1.0002	0.990631	0.99212	0.981276	0.989093	1.00401	0.985041	0.984333	0.992271	0.9914	1.00174	0.990726	1.01752	1.01144	0.996817	1.00568
	1.35885	1.01721	1.01857	1.01285	1.00795	1.01752	1.01908	1.00797	1.0207	1.00598	0.990869	0.993177	0.997514	0.995244	0.994975	0.992156	1.00259	1.00024	0.989151	0.983364	0.99687	0.993704	0.994233	0.997156	0.98832	0.985187	0.995769	0.971833	0.981698	0.978588	0.979665	0.984632	0.982848	0.987134	0.987651	0.986676	0.987229	0.983714	0.993078	0.992369	0.989472	0.983835	0.978225	1.01561	0.999333	0.996253	1.01939	0.996769	1.02252
	1.35873	1.01084	1.0154	1.00442	1.02628	1.01596	1.02034	0.999932	1.02146	1.00944	0.989912	1.00474	0.990514	0.990873	0.99321	0.982117	0.991254	0.975012	0.988138	0.982793	0.983577	0.975822	1.00237	0.995775	0.988422	0.988168	0.991947	0.994254	0.98365	0.982768	0.975473	0.98563	0.992272	0.985876	0.99481	0.988603	0.98973	0.978426	0.986424	0.998941	0.974447	0.997858	0.985903	0.996609	0.988697	0.994496	0.988687	1.0001	1.00125
	1.35862	1.01679	1.01261	1.01719	1.01256	1.0311	1.02606	1.01147	1.02616	1.00228	1.00062	0.992939	0.9956	0.991249	0.99007	0.976127	0.992818	0.986259	0.984748	0.990585	1.00218	0.995678	1.00776	0.975522	0.976463	0.990018	0.984192	0.995207	0.969266	0.98339	0.982488	0.978054	0.97923	0.993697	0.991562	1.00231	0.992741	0.982662	0.993233	0.999351	0.990893	0.989752	0.982499	1.00405	0.988078	1.01733	0.995244	1.00008	1.00693
	1.3585	1.01106	1.00855	1.01476	1.01521	1.00833	1.01999	1.00939	1.01251	0.999069	0.999669	0.989406	0.995603	0.993969	0.9854	0.984256	0.984536	0.983129	0.986466	0.978747	0.991731	0.983967	0.979221	0.982535	0.979483	0.983233	0.969438	0.977251	0.96332	0.984703	0.989462	0.976551	0.968554	0.989608	0.981773	0.995631	0.991277	0.983941	0.99092	0.9971	0.985901	1.00376	0.997815	1.00146	0.986499	0.995947	0.996462	0.998076	1.01442
	1.35838	1.00603	1.02036	1.0162	1.01654	1.0211	1.00654	1.00607	1.02131	0.996899	1.00172	0.987208	0.994273	0.999439	0.985254	0.993438	0.98128	0.985753	0.9852	0.98227	0.981747	0.986006	0.985913	0.989241	0.989715	0.972148	0.969257	0.98362	0.980887	0.974182	0.976379	0.960249	0.972633	0.991682	0.98632	0.992791	0.986814	0.989271	0.985405	0.990664	0.980279	0.996083	0.993995	0.994769	1.00013	0.99813	0.991272	0.99597	1.00199
	1.35827	1.01936	1.01061	1.00738	1.00774	1.02108	1.02328	1.00792	1.02062	1.00509	0.998726	0.990007	1.00435	0.996561	0.998013	0.983841	0.994502	0.979404	0.979044	0.981847	0.985014	0.983913	0.994111	0.992067	0.967653	0.987964	0.977594	0.977854	0.990142	0.974153	0.974171	0.977482	0.965161	0.987341	0.996183	0.996767	0.998008	0.990172	0.99604	0.98678	0.981805	0.983283	0.983066	0.990026	0.989764	1.0181	1.00054	0.995031	1.0106
	1.35815	1.01652	1.01806	1.01231	1.01142	1.02056	0.997159	1.00852	1.01409	1.00815	1.00471	1.00235	0.988892	0.992639	0.993505	0.990897	0.971558	0.989598	0.981435	0.987663	1.00959	0.987283	0.983175	0.978599	0.993085	0.968472	0.985814	0.977533	0.978028	0.980394	0.985823	0.968123	0.978299	0.991064	0.974202	0.996328	1.00221	0.999796	0.976576	0.993571	1.00184	1.00375	1.00316	0.99599	0.996055	0.994619	1.00325	1.00505	1.00501
	1.35804	1.02063	1.01184	1.0077	1.01196	1.02518	1.01339	1.02145	1.01486	1.00567	1.00052	0.995972	1.00165	1.00361	1.0046	0.979673	0.998422	0.986207	0.978515	0.989274	0.985747	0.986705	0.998619	0.978163	0.972699	0.969498	0.981597	0.977656	0.982009	0.979846	0.994594	0.971806	0.983128	0.987778	0.98391	0.985038	0.992281	1.00624	0.984378	0.985996	0.985078	0.992877	0.975423	1.00025	1.00242	0.994912	0.998521	0.998389	1.00795
	1.35792	1.01448	1.00349	1.01637	0.993999	1.00183	1.01158	0.999312	1.0134	1.00545	1.00853	0.996225	0.98885	1.00166	0.989744	0.991356	0.980397	0.982383	0.991306	0.989533	0.988122	0.982193	0.98805	0.978843	0.980829	0.98713	0.985271	0.986309	0.991919	0.979321	0.979104	0.980316	0.977893	0.976813	0.97792	0.991809	0.986121	0.99343	0.981401	0.982647	0.99328	0.971797	0.994164	0.99736	1.00044	1.00035	1.00828	0.996091	1.01178
	1.35781	1.00421	1.02313	1.01904	1.00932	1.01624	1.00559	1.00299	1.01005	0.986166	1.0045	0.984309	1.00462	0.999088	0.996889	0.982651	1.00633	0.99105	0.988546	0.982981	1.00197	0.989459	0.996494	0.96672	0.975458	0.986882	0.988907	0.994747	0.983576	0.987558	0.992842	0.977574	0.969702	0.972427	0.974528	0.992749	0.993298	0.990216	1.00562	0.991452	0.993341	0.995492	0.993263	1.00219	0.985819	1.00168	0.997728	0.998377	1.00816
	1.35769	1.01278	1.01602	1.00422	1.01003	1.00967	1.01066	1.01051	1.01195	1.00802	0.99342	0.983967	0.992762	1.00165	0.993521	0.98588	1.00284	0.992144	0.994323	0.98976	0.991483	0.983449	0.973982	0.978972	0.990047	1.00133	1.00558	0.993023	0.998119	0.990802	0.991143	0.981362	0.976611	0.973331	0.973032	0.981209	0.986756	0.994425	0.988455	0.983723	0.990179	0.985135	0.997688	1.00427	0.99175	1.00531	1.00335	0.995258	0.992377
	1.35758	1.0223	1.01512	1.01737	1.00253	1.02502	1.00404	1.01346	1.00414	1.00138	1.00903	0.999262	0.997213	0.983368	0.9914	1.00026	0.983122	0.984265	0.998328	0.996411	0.990447	0.964836	0.997939	0.986675	0.990439	1.0058	1.00186	0.994787	0.996348	0.991921	0.995281	0.987925	1.00803	0.975521	0.97594	0.98354	0.995618	0.994626	0.982336	0.976943	0.970868	0.991563	0.997261	1.0067	0.992065	0.997616	1.00125	0.999082	1.00802
	1.35746	1.01206	1.00443	1.01906	1.011	1.0085	1.02317	1.00788	1.01977	0.996963	0.995282	0.987744	1.00236	0.991758	0.999044	0.99756	0.988155	0.985943	0.984796	0.98992	0.996392	0.985525	0.984835	0.970963	0.994551	0.997853	0.985033	0.999167	0.994677	1.01149	0.992524	0.991959	0.999267	0.985691	0.985165	0.980146	0.986904	0.991344	0.997894	0.985588	0.979521	0.997809	0.987358	0.993986	0.998904	1.00898	1.00188	0.985148	1.01739
	1.35735	1.01104	1.00652	1.01556	1.01623	1.01153	1.0204	1.00448	1.00566	0.993388	0.992803	0.982774	0.99178	0.989555	0.996249	0.987474	1.00065	0.992946	0.982607	1.00266	0.981452	0.970481	0.978498	0.976609	1.00431	1.01057	1.01471	0.99203	0.99703	1.00552	1.0001	0.991292	0.984621	0.991307	0.974614	0.975989	0.983681	0.990845	0.987384	0.981107	0.981195	0.991916	0.993648	1.00367	0.989178	1.00237	0.99917	0.997285	1.00187
	1.35723	1.0159	1.00756	1.00536	1.00698	1.02456	1.00758	1.00963	1.01254	1.00379	0.993	0.995511	0.987574	0.993338	0.996531	1.00531	0.991432	0.984475	0.995381	0.995254	0.976716	0.975673	0.988522	0.978844	1.00023	0.997702	1.00487	0.997005	0.98944	0.98362	0.992295	1.01047	0.998566	0.986959	0.972252	0.962064	0.977954	0.992378	0.988013	0.984768	0.977354	0.993088	1.0021	1.00006	0.991642	1.00176	1.00516	0.993895	1.00887
	1.35711	1.01229	1.01399	1.01769	1.01753	1.02522	1.00073	1.00293	1.0173	0.994765	0.986562	0.99297	0.998306	0.99242	0.995109	1.00295	0.976917	0.974187	0.993386	0.987827	0.98782	0.970509	0.975757	0.987071	1.0083	0.998493	0.994074	1.00277	0.996192	0.997868	1.00291	1.00258	0.996052	0.986317	0.986069	0.984829	0.972587	0.986876	0.993657	0.98649	0.986242	1.00944	0.985794	0.992499	0.975882	0.992362	1.00873	0.985176	0.995783
	1.357	1.01296	1.00518	1.00662	1.01169	1.0094	1.01171	1.01507	1.01691	1.02236	0.98518	1.01331	0.992211	0.99275	0.993925	1.00465	0.972299	1.00303	0.996779	0.979015	0.992275	0.987729	0.985869	1.00396	1.00185	1.00429	0.997214	1.00095	0.992579	0.997456	0.996988	0.989788	1.00739	0.992566	0.998838	0.982426	0.976185	0.986788	0.995848	0.99687	0.982084	0.998455	0.991044	0.996924	0.990849	1.0073	0.996558	0.99654	1.00392
	1.35688	1.00632	1.01078	1.01021	1.00562	1.02338	1.00732	1.0126	1.00277	0.99211	0.990133	0.992251	0.98863	0.97247	0.988881	0.994972	1.00378	1.00071	0.991525	0.986888	0.970885	0.982095	1.00165	0.994889	0.991944	1.00176	0.995269	0.982871	0.990706	0.972458	0.996601	0.987502	0.990337	1.00781	0.995106	0.976865	0.981996	0.977578	0.984644	0.985549	0.980304	0.990663	0.996158	1.00389	0.98519	0.999072	0.999079	0.98804	1.00177
	1.35677	1.01605	1.00421	1.01426	1.01088	1.02305	1.00557	1.00561	1.01262	1.01352	1.00087	0.99105	0.993081	0.98305	1.00016	0.982016	0.987829	0.983653	1.00192	0.993687	0.98711	0.978547	0.984458	0.997921	1.00662	0.995882	0.992328	0.993926	0.980053	0.994335	0.996036	0.98879	0.996434	0.985284	0.995249	0.981585	0.981355	0.970728	1.00184	0.978868	0.987815	0.977638	0.995357	0.99798	1.01307	1.00862	1.00631	0.985972	1.00861
	1.35665	1.01132	1.01987	1.00649	1.01618	1.00946	1.00671	1.00788	0.999285	1.00801	1.01019	0.996028	0.998169	0.989813	0.994451	0.989144	0.988824	0.996707	0.991326	0.976455	0.972502	0.989395	0.987312	0.998351	0.995104	0.977363	1.00426	1.00417	0.989537	0.988217	1.00356	1.00417	0.988564	0.98626	0.985398	0.993477	0.969902	0.986555	0.979811	0.993972	0.98238	0.990148	0.989353	0.997974	0.990351	0.994695	0.99431	1.00017	1.01276
	1.35654	1.00609	1.01518	1.01287	1.0133	1.02354	1.01242	1.01829	1.01626	0.998594	0.996596	0.99111	0.995974	0.988609	0.999331	0.990168	0.991944	0.989693	1.00024	0.988576	0.982398	0.992606	1.00083	0.997153	0.996325	0.992981	1.00391	1.00191	0.986604	0.987229	1.00022	0.993708	0.999602	0.997101	0.997957	0.987233	0.988558	0.983209	0.992946	0.98474	0.986869	0.992263	0.979828	1.01131	0.992564	1.00638	0.990998	0.988686	0.999556
	1.35642	1.00597	1.01136	1.00509	1.01079	1.02384	1.01612	1.00787	0.998305	1.00264	0.997916	1.00085	1.00266	0.993299	0.998672	0.982447	0.985246	0.986248	0.983969	0.974187	0.989374	0.988923	0.990683	0.994779	0.980949	1.00651	0.981589	0.99138	0.990867	1.0004	0.998717	1.00251	0.999998	0.993481	1.00208	0.994925	0.977176	0.986982	0.996984	1.00142	0.996431	0.983456	0.99097	0.995183	0.987188	1.00267	0.985113	0.988037	1.00639
	1.35631	1.01442	0.99971	1.01751	1.00368	1.01373	1.00975	1.00294	1.00567	0.994895	1.00488	0.983544	0.98437	0.987803	1.00096	0.987631	0.999322	0.98632	0.982673	0.974025	0.986321	0.993513	0.99585	0.978026	0.998092	0.998559	0.990694	0.994698	0.995435	0.995509	0.995331	0.992549	1.00622	1.00795	0.995587	1.00609	0.990508	0.969949	0.992783	0.991852	0.990116	0.984789	0.990761	0.989516	0.983266	0.997721	0.989654	0.995639	0.998279
	1.35619	1.00334	1.01262	1.01626	1.02369	1.01477	1.01167	0.998802	1.00909	0.989817	0.998425	0.976685	0.991629	0.989234	0.987455	0.992051	0.98849	0.986504	0.986574	0.986005	0.997086	0.990744	1.00449	0.985892	0.995246	0.983872	1.00286	0.992667	0.9934	0.995734	0.990998	0.979817	0.978612	1.00033	0.998517	1.00482	0.984903	0.978875	0.98489	0.993412	0.995884	0.981328	0.984865	0.995214	0.994549	0.995632	0.994653	0.990085	1.01151
	1.35608	1.00694	1.00355	1.01934	1.01518	1.02129	1.01295	1.00315	0.998389	1.00324	0.998761	0.991065	1.0054	0.991377	1.00164	0.989081	0.996622	0.984105	0.980359	0.978777	0.988022	0.998958	0.983349	0.988977	0.984261	0.997504	1.00155	0.991139	0.993426	0.994915	0.990522	0.983867	0.996983	1.00129	0.99972	0.986954	0.993577	0.991427	0.971657	0.99295	0.985663	0.992007	0.983599	0.989992	0.993593	0.995414	0.995327	0.998721	1.00544
	1.35596	1.00851	1.01429	1.00439	1.02104	1.02568	1.00379	0.999051	0.998123	0.996784	1.00081	0.978272	1.0045	0.997912	0.995333	0.990173	0.988004	0.981675	0.984494	0.997367	0.988552	0.998662	1.0035	1.00318	1.00463	0.99011	0.999821	0.990921	0.988853	0.995809	0.99796	0.992012	0.986542	1.0034	0.998943	0.993875	0.994934	0.983821	0.980815	0.982498	0.976772	0.971988	0.991991	0.994509	1.01446	1.00524	0.998562	0.991458	1.00462
	1.35585	1.01163	1.01712	1.00888	1.0085	1.01421	1.00723	1.00701	1.01244	1.00965	1.0017	0.98182	0.993577	0.996472	0.994446	0.981105	0.999739	0.982274	0.983001	0.98271	1.00222	0.992892	1.01088	0.993298	0.985111	1.00678	0.993316	0.988991	0.981531	0.988571	0.987412	0.985514	0.997454	0.990161	1.00235	1.00224	0.992417	0.98539	0.968381	0.993759	0.991274	0.994098	0.994486	1.00134	1.00062	1.0015	1.00688	0.987742	0.999733
	1.35573	1.01265	1.00478	1.00395	1.00537	1.01508	1.00897	1.00899	1.01011	0.991944	1.00295	0.99042	0.994128	0.988456	0.984918	0.988268	0.987943	0.974522	0.989559	0.983603	0.993177	0.993218	1.01047	0.99505	0.993936	0.993233	0.991902	1.00246	0.984858	0.974976	0.992143	0.994546	0.996775	0.988118	0.991451	0.993541	0.998093	0.996079	0.975699	0.985823	0.998222	0.995693	0.980686	1.00531	0.990854	0.999796	0.983018	0.990584	0.997064
	1.35562	1.01462	1.00788	1.00657	1.02054	1.01136	1.0001	0.989919	1.00187	0.99923	0.994009	0.984233	0.988501	0.993618	0.987716	0.993417	0.987871	0.98175	0.984349	0.986955	0.990382	0.997357	0.991228	1.00532	0.994658	0.990415	0.990736	0.997294	0.998598	0.982885	0.97929	0.990492	0.993115	1.00675	1.0004	0.989554	0.992855	1.00056	0.98646	0.982218	0.996876	1.01207	0.974573	0.996266	0.981886	0.997891	0.9858	1.00133	0.993384
	1.3555	1.00404	1.01371	1.01132	1.01126	1.0124	1.01416	0.996309	1.00667	0.998145	0.999436	0.98523	0.991961	0.997721	0.982845	0.9901	1.0008	0.981498	0.994513	0.992696	0.990392	0.996299	1.0065	0.986593	0.983344	0.972126	0.974759	0.992891	0.985744	0.981931	0.99111	0.979324	0.982584	0.994053	0.989996	0.988958	0.990667	0.986767	0.982002	0.990255	0.994182	0.992576	0.983498	0.994143	1.00017	1.00234	0.992261	0.999793	0.997438
	1.35539	1.00171	1.0153	1.01224	1.00935	1.01713	1.01031	1.00486	0.998633	1.00553	0.994285	0.998162	1.00266	0.995382	0.986096	0.994338	0.989995	0.979967	0.983479	0.991292	0.985671	0.991613	0.982191	0.993328	0.993593	0.96705	0.98156	0.978699	0.973989	0.966801	0.97661	0.984894	0.99039	0.998005	0.991576	0.99435	0.991345	1.00385	0.984746	0.98385	0.990426	0.985313	0.99184	1.00285	0.989694	1.0032	0.988767	0.991825	0.997083
	1.35527	1.01261	1.00997	1.01425	1.01096	1.01388	0.995352	1.00188	0.999377	1.00801	1.00458	0.986579	0.99028	0.996246	0.988803	0.998464	0.998391	0.979201	0.985762	1.00811	0.984783	0.992897	0.994699	0.988882	0.990941	0.975477	0.980959	0.977052	0.971089	0.983037	0.981378	0.982814	0.982187	0.982882	0.983954	0.99341	1.00063	0.997135	0.99871	0.989858	0.982349	0.994935	0.984074	0.992705	0.985843	0.992196	0.995926	0.988832	1.00847
	1.35516	1.01075	1.00917	1.01823	1.00737	1.00753	1.00631	1.00562	0.996766	1.00563	1.00856	0.987811	0.992921	0.99559	0.985544	0.985568	0.988438	0.98537	0.992768	1.00686	0.996446	0.987065	1.00181	0.975661	0.982901	0.984222	0.961602	0.978326	0.964744	0.97007	0.983942	0.990846	0.976444	0.991355	0.987716	0.994567	0.984518	0.993888	0.989919	0.979934	0.983199	0.989727	0.998481	0.993552	0.986814	0.995559	1.00209	0.988053	0.99464
	1.35504	1.01296	1.00323	1.00983	1.01464	1.00844	1.00871	0.996057	0.988507	0.990209	0.990927	0.982536	0.997171	0.992364	0.991577	0.988316	0.99436	0.980164	0.997971	0.99497	0.987352	0.992408	0.990152	0.970883	0.983808	0.976286	0.971609	0.973643	0.950763	0.976454	0.978337	0.978288	0.984827	0.984373	0.986882	0.989944	0.995188	0.979959	0.992384	0.96725	0.980103	1.00389	1.00182	0.988457	0.990349	0.993755	0.992139	0.989515	0.993438
	1.35493	1.00978	1.00689	1.0197	1.01045	1.01119	0.995416	0.998703	1.01137	1.00502	0.992716	0.981372	0.994537	0.986159	0.98929	0.985709	0.987527	0.980734	0.994516	0.996322	0.998957	0.993823	0.982176	0.977311	0.97916	0.968104	0.977828	0.960613	0.975542	0.965853	0.972868	0.973602	0.982645	0.995687	0.997116	1.00313	0.993271	0.99415	0.99567	0.982891	0.977595	0.994154	0.992447	0.988036	1.00654	1.00556	0.986313	1.00149	0.980467
	1.35481	1.00857	1.01585	1.01594	1.02	1.00726	1.00125	0.999462	1.00027	0.997754	0.9957	0.986273	1.00128	0.980062	0.986163	0.992286	0.981193	0.981955	0.989429	0.995632	1.00559	0.993449	0.990641	0.987043	0.979718	0.981129	0.966717	0.969079	0.964175	0.968375	0.959563	0.964701	0.972077	0.980493	0.986456	0.98805	0.987831	0.989266	1.00499	0.977565	0.984452	0.986722	0.999858	0.988977	1.00051	0.999615	0.989491	0.987855	0.999177
	1.3547	1.00329	1.01971	1.00671	1.00746	1.00943	1.00321	1.0008	1.0047	0.991767	1.00237	0.991222	0.99803	0.985229	0.996886	0.998434	0.990605	0.986884	0.9927	0.997617	0.977231	0.997132	0.985455	0.975656	0.969856	0.981956	0.975981	0.965614	0.970294	0.96373	0.963331	0.955884	0.974715	0.991796	0.997909	0.988449	0.997876	0.988039	1.00415	0.978845	0.973934	0.989381	0.980603	0.992899	0.993185	0.999651	0.994669	0.983502	1.00298
	1.35458	1.01077	1.00005	1.00933	0.999947	1.0095	0.997372	1.00327	0.991851	1.00965	0.983818	0.988596	0.998405	0.98904	1.0059	0.997164	0.970311	0.988485	0.995089	1.00612	0.99013	0.985535	0.982679	0.985508	0.959732	0.974853	0.9771	0.980979	0.970886	0.97745	0.985983	0.963395	0.957145	0.978565	0.989473	0.98746	0.989172	0.991926	1.0088	0.989928	0.968595	0.992228	0.981723	0.993992	0.992213	0.993969	1.00454	0.99205	1.00371
	1.35447	1.01049	1.01754	1.01777	1.00533	1.00759	1.0114	0.997096	1.01257	0.990772	0.991414	0.976742	0.992183	0.992859	0.985666	0.994467	0.979281	0.984946	0.993789	0.990557	0.993871	0.996595	0.962552	0.974457	0.96404	0.966591	0.990921	0.993502	0.97486	0.967146	0.973959	0.980499	0.966541	0.974741	0.985465	0.97392	0.990033	0.998893	0.9962	0.997387	0.975297	0.994959	0.994394	0.999714	0.996779	0.998259	0.990073	0.984484	0.988127
	1.35435	1.02611	1.00733	1.00664	1.00516	1.01437	1.00065	0.996298	0.995716	0.989626	1.00233	0.9936	0.989578	0.990005	0.996938	0.990148	0.978548	0.994343	0.986159	0.997479	0.986898	0.98749	0.969316	0.974814	0.962172	0.97211	0.991429	0.98275	0.985276	0.990536	0.979471	0.971426	0.966434	0.972213	0.979516	0.990477	0.987447	0.994925	1.00277	0.992146	0.988489	0.987225	0.989254	0.995385	1.00343	0.993321	0.99266	0.983217	0.995482
	1.35424	1.00974	1.00864	1.01374	1.01658	1.0177	0.998023	0.990109	1.00284	0.994129	0.999667	0.988361	0.993574	0.990551	0.992512	0.988976	0.970324	0.991109	1.00797	0.976958	0.982242	0.972226	0.983041	0.957241	0.98068	0.976979	1.00164	0.981563	0.998124	0.985791	0.988312	0.98569	0.977547	0.978975	0.979058	0.984051	0.993488	0.995483	0.98447	0.991772	0.981005	0.987006	0.994655	0.997107	0.981664	0.99598	1.00963	0.977128	0.994698
	1.35412	1.01531	0.994168	1.00901	1.01051	1.00493	1.01313	0.997296	0.999439	1.00709	1.00916	0.992578	0.997677	0.991471	0.993696	0.987617	0.994315	0.998015	0.99963	0.996491	0.988031	0.975693	0.97598	0.975351	0.979429	0.987813	0.992323	1.00193	0.985637	0.977374	0.990993	0.997242	0.980802	0.970985	0.969419	0.963403	0.990457	0.998282	0.987256	1.00607	0.972172	0.975869	1.00108	1.00892	0.989556	1.00108	0.9958	0.989077	0.98683
	1.35401	1.01467	1.01245	1.00244	1.00934	1.00701	1.00585	1.00099	1.00101	0.999157	1.00005	0.977593	0.988681	0.995115	0.992336	0.988577	0.992735	0.989495	1.00993	0.999374	0.983357	0.969889	0.968263	0.973538	0.992098	0.99792	1.00897	0.997976	0.995689	0.994203	0.981243	0.98269	0.988729	0.972242	0.965542	0.989581	0.982878	0.968831	0.990802	0.989084	0.998602	0.986084	0.993373	1.00328	0.973916	0.994686	0.997837	0.995176	0.999312
	1.35389	1.02	1.00409	1.01623	1.00369	1.01827	0.998427	1.00384	0.998693	0.995966	0.997178	0.989048	0.995295	0.999732	1.00358	0.977277	0.993448	0.99498	0.996045	0.991479	0.985652	0.964773	0.953956	0.983379	0.984013	0.986728	0.996105	0.99595	1.00134	1.00917	0.995912	1.00154	0.990345	0.965531	0.971463	0.979293	0.979121	0.98175	0.986416	0.993382	0.999066	0.980999	0.98663	1.00746	0.987022	1.00018	0.993556	1.00592	0.98999
	1.35378	1.01548	1.00894	1.01635	1.00892	1.00118	1.00068	1.00261	1.00492	0.996095	0.995504	0.997879	0.989695	1.0012	0.999599	0.983237	0.99558	1.01076	0.997376	1.00019	0.979537	0.979484	0.977086	0.988392	0.985371	0.996097	0.994956	1.0138	0.996802	1.00453	0.999457	0.991643	0.9895	0.980088	0.972488	0.972599	0.991667	0.985835	0.998211	1.01449	1.00635	0.985497	0.981122	0.992297	0.994017	0.999173	0.995524	0.984106	1.00647
	1.35366	1.00072	1.0114	1.01433	0.999437	1.01722	0.996964	1.0009	1.00291	0.994405	0.995029	0.995927	0.98454	1.0041	0.989406	0.999091	0.986323	0.99005	0.99337	0.99083	0.973755	0.974261	0.964469	0.974779	0.993831	0.997269	1.00765	1.00512	0.997714	0.999884	0.999011	0.989162	1.001	0.983286	0.962896	0.974523	0.970043	0.980195	0.981371	0.993465	0.991802	0.974297	0.976867	1.00408	0.997052	0.988129	0.987667	0.987991	0.997396
	1.35355	1.01648	1.01041	1.01577	1.00624	1.01007	0.985782	0.991955	1.01294	0.98009	1.0005	0.980265	0.995776	1.00216	0.984826	0.997472	0.984092	0.993888	1.00498	0.989905	0.981553	0.969581	0.988128	0.996791	0.985396	0.996804	1.00339	1.00577	1.00936	0.978489	1.00126	0.995244	1.00311	0.995344	0.978505	0.973931	0.972695	0.986953	0.995933	0.99655	0.98339	0.985863	0.985912	0.993111	0.997622	0.987736	0.978792	0.989442	0.997199
	1.35343	0.996656	0.99851	0.997717	1.00231	1.0158	0.999905	1.00368	1.00173	0.998537	0.996602	0.9887	0.977747	1.00144	0.983699	0.987441	0.980576	0.996552	0.989715	0.993996	0.969073	0.991703	0.98241	0.976918	0.992392	1.00503	0.997952	0.990731	0.991953	0.996251	0.997521	0.998431	0.99457	0.981231	0.992444	0.972585	0.974414	0.9841	0.997379	1.00311	0.990852	0.984858	0.976149	0.984598	0.992447	1.00439	0.987511	0.984218	1.00764
	1.35332	1.01163	1.00936	0.996059	1.00914	1.02163	1.00118	0.997072	0.999192	0.994887	0.987648	0.972291	0.984577	1.00282	0.989432	0.981616	0.993081	1.00622	0.99107	0.979028	0.970523	0.984637	0.992886	0.988056	1.01155	0.994148	0.996213	0.99899	0.99638	1.00839	0.996035	0.982343	1.00605	0.998832	0.99111	0.985698	0.986983	0.988746	0.993645	0.986897	0.992775	1.00191	0.984118	0.999525	0.980917	0.981254	1.00151	0.990149	1.00819
	1.3532	0.999046	1.00427	1.01492	1.00777	1.00555	0.999083	0.992185	0.992239	0.993461	0.982906	0.98261	1.00676	0.997078	0.992127	0.99212	1.00404	0.999771	0.984388	0.990023	0.976855	0.985381	0.996284	0.99056	0.992503	1.00556	0.996004	1.00714	0.997002	1.005	1.00646	0.99845	0.99174	0.986684	0.983732	0.976997	0.971318	0.978258	0.987744	0.996511	1.00131	0.996595	0.967963	0.993623	0.987043	1.01124	0.997909	0.991637	0.994836
	1.35309	1.00758	1.00532	1.01206	1.00592	0.997123	0.995835	1.00367	1.00363	1.00009	0.990181	0.981041	0.991823	0.995736	0.981298	0.988563	0.995422	0.990274	0.986387	0.964264	0.9694	0.989111	0.98293	0.995679	0.989661	0.991159	0.997103	0.990163	0.986554	1.00202	1.01107	1.00461	1.00688	0.998928	0.98856	0.993565	0.956544	0.966801	0.985174	0.982303	1.01007	0.986026	0.980953	1.00549	1.0046	1.00125	1.00177	0.987929	0.991141
	1.35298	1.01281	1.00204	1.01009	1.00483	1.00669	1.00691	0.989282	0.991927	0.995877	1.01741	0.980764	1.00418	0.988238	0.985739	0.987026	0.993767	0.9935	0.980396	0.964148	0.976744	0.993843	1.00077	1.00177	0.995089	1.00048	1.00818	1.00377	1.00074	0.996004	0.999891	1.00666	0.985333	1.00048	0.985086	0.97673	0.9737	0.974884	0.984246	0.981546	0.983746	0.998581	0.989326	0.984621	1.00148	0.985398	1.00391	0.989984	1.00238
	1.35286	0.997292	1.00166	1.00876	1.01194	1.00916	1.00622	1.00094	1.00393	0.990824	0.997071	0.973906	1.00149	0.992663	0.996002	0.992425	0.990184	0.992516	0.989594	0.97249	0.976138	0.993666	0.99148	1.00602	0.996116	1.00399	0.98409	0.988724	1.00154	1.00864	0.993509	1.00001	1.00328	1.01369	0.987116	1.00114	0.978267	0.966194	0.981458	0.988458	0.994508	0.99767	0.987568	0.979505	1.00334	0.976087	0.99894	0.987115	0.999536
	1.35275	1.00393	1.01589	1.00444	1.0035	1.001	1.00209	1.00284	0.991929	0.983778	1.00033	0.986754	0.990527	1.00039	0.998796	0.999112	0.989956	0.985336	0.980752	0.961313	0.992508	0.993924	0.996328	1.00397	1.00082	0.99423	1.00632	1.00215	0.997817	0.990775	0.991147	0.986424	1.00157	1.00045	0.99536	0.996096	0.974402	0.968015	0.967585	0.990226	0.998467	0.99861	0.990566	0.980981	0.986421	1.00179	0.989922	0.9804	1.00577
	1.35263	1.00035	0.997721	1.00668	1.01609	1.00062	1.00356	1.00065	1.00996	0.994862	0.999315	0.989135	0.994136	0.99028	0.986944	0.995766	0.999257	0.987027	0.984829	0.975425	0.992554	0.998209	1.00811	0.99093	1.00088	1.00444	1.01564	0.998674	1.00277	1.00377	1.00329	0.985911	0.980351	0.994797	0.989832	0.998964	0.987266	0.975422	0.989854	0.976791	1.00615	1.00482	0.994739	0.987477	0.994382	0.985805	0.989218	0.989258	0.998229
	1.35252	1.00779	0.998929	0.999371	0.995785	1.00142	1.0025	0.999374	0.990295	1.00618	0.985506	0.99515	0.995306	0.983999	0.999657	0.995587	0.995294	0.993122	0.959809	0.966012	0.983943	1.00205	1.01066	1.00986	0.993849	0.996532	1.00284	0.998288	0.99685	0.987586	0.994508	0.991884	0.991857	0.994141	1.00116	0.999591	0.985832	0.973941	0.960753	0.974555	0.979082	1.00166	0.981765	0.980692	0.99416	1.00191	0.994573	0.985823	0.999214
	1.3524	1.00495	0.991786	0.997105	0.999068	1.00077	1.00814	0.987283	0.990384	0.998314	0.99687	0.999794	1.00238	0.983992	0.987825	0.984742	0.993351	0.982556	0.970891	0.985515	0.992653	0.998253	0.994004	0.994555	0.990144	1.00487	1.00765	0.996706	0.992533	0.996902	1.00462	1.00287	0.997403	1.00641	1.00644	1.00142	0.98977	0.980101	0.963734	0.998587	0.992352	0.989154	0.998184	0.978009	0.992412	0.999067	0.996724	0.985874	0.99012
	1.35229	1.00473	1.00511	1.00099	0.99346	0.999672	1.00504	0.994725	0.987995	0.996041	1.00079	0.993162	0.985515	0.979249	0.996544	0.991801	0.997749	0.990013	0.977829	0.98123	0.99192	0.996159	1.00198	0.986722	1.00573	1.00068	1.00143	1.00318	0.998691	0.998164	1.00339	0.995034	0.988637	0.996703	1.00087	0.994567	0.991842	0.983703	0.970034	0.975854	0.990219	0.992275	0.99678	0.994931	0.999085	0.993873	0.992417	0.984849	0.994112
	1.35217	0.996498	1.00322	0.994756	0.999232	1.00882	1.00969	0.999011	1.0089	0.991184	1.00661	0.979084	0.993525	0.980519	0.994642	1.00118	1.00102	0.977602	0.969382	0.990704	1.00086	1.00971	0.995325	0.997688	0.997818	0.994718	0.988405	1.00095	0.997797	0.991671	0.997859	1.00474	0.995855	0.998597	1.01265	0.99891	0.995284	0.987022	0.971868	0.977949	0.977726	0.997377	1.00122	0.98993	0.985006	0.995992	0.986218	0.991894	0.995221
	1.35206	0.993096	0.998215	1.00849	0.998233	0.999741	0.995978	1.00457	0.998245	1.00521	0.99132	0.990629	0.99808	0.985002	1.00015	0.992747	0.986563	0.988829	0.980493	0.988029	0.998471	1.00706	1.01204	0.994644	1.00494	0.999915	0.994371	0.996786	0.983739	0.992355	1.00686	0.989324	0.994468	1.00452	1.00734	1.00692	0.993716	1.00034	0.968884	0.98238	0.988506	0.99718	0.994433	0.994556	1.00097	1.00166	0.98849	0.998763	0.991202
	1.35195	0.997467	1.0026	1.01281	1.00035	1.01102	0.997497	0.995045	0.993223	0.99728	0.987973	0.982413	0.988428	0.972868	0.994653	0.989288	0.987944	0.979659	0.983634	0.99529	1.00564	0.993053	0.989083	0.997216	0.983911	1.00175	0.985497	1.00373	0.99788	0.999925	0.988915	0.994158	0.991913	0.987637	0.993404	1.00563	1.00328	0.998152	0.978741	0.97753	0.986878	1.00734	0.989527	0.993503	0.986338	1.00053	0.980102	0.988628	0.991851
	1.35183	0.998273	0.998527	0.997922	1.00037	1.00066	0.995047	1.00289	0.993003	1.00207	0.989295	0.985696	0.988357	0.99131	0.996558	0.997514	0.984909	0.978975	0.996331	0.99913	1.00808	0.99585	0.988397	1.00812	1.00135	0.998507	0.989949	0.996092	0.989614	1.0081	0.997379	0.997843	0.994844	1.00031	0.995879	0.995801	0.999105	0.985767	0.984649	0.975805	0.979766	0.997928	1.00067	0.994827	0.978799	1.00265	0.98788	0.99505	0.995224
	1.35172	1.00007	0.999102	1.00253	1.00015	1.00965	0.988305	0.999469	1.00345	0.995447	0.994091	0.990149	0.984637	0.995136	1.00358	0.99718	0.982206	0.968938	0.978041	1.01099	1.01014	1.00432	1.01817	0.9987	1.00435	0.997389	0.992151	1.00012	0.983958	0.99613	0.993805	1.00054	0.994046	0.995566	0.997457	1.00545	0.999788	0.998016	0.988748	0.965294	0.974914	0.990134	0.987939	0.994864	0.99741	0.998868	0.988982	0.986821	0.987395
	1.3516	0.999822	1.00157	0.988926	0.994935	1.00221	1.00167	0.998118	0.992746	0.996099	0.991137	0.9971	0.972852	1.00192	0.997624	0.993174	0.985307	0.969382	0.985004	0.998923	0.994692	0.989279	0.989572	0.995633	0.988995	0.99448	1.00736	1.00092	0.993137	1.00706	0.9863	0.996924	0.992786	0.991335	0.997017	0.997668	0.995305	0.984951	0.993584	0.97161	0.983219	0.997297	0.989671	0.997099	0.989207	0.992566	0.987815	0.984294	0.998403
	1.35149	1.00356	0.993585	1.00049	0.996173	0.999558	1.01175	1.00373	0.993654	0.992164	0.997958	0.986158	0.974565	0.99681	0.99493	0.98386	0.991341	0.975194	0.996217	1.0035	0.995668	1.00164	1.01022	1.00166	0.99439	0.987306	0.988081	0.977338	0.987581	0.988466	1.00554	0.987655	0.996071	0.994363	0.991678	0.997849	0.996022	0.998627	0.990404	0.976232	0.96366	0.983411	1.00717	1.00082	0.993194	0.998216	0.99796	0.973882	0.98611
	1.35137	0.995857	1.00204	1.00109	1.00342	1.00735	1.00236	0.996153	0.995664	0.987031	0.990696	0.985473	0.988103	0.994666	1.01285	0.992192	0.97643	0.986686	0.993684	0.99052	1.00849	1.00109	0.993272	0.989726	0.997049	1.00757	0.99513	0.995826	0.991144	0.984986	0.995856	0.989028	0.993471	1.00364	0.983923	1.00109	1.00015	1.00341	0.993349	0.979396	0.969188	0.986804	0.997275	1.00346	0.986183	0.999558	0.997567	0.979014	1.00209
	1.35126	0.993081	0.993617	0.995022	1.00086	1.00735	0.993851	0.9879	1	0.996146	1.00041	0.97615	0.98556	0.999755	0.994685	0.990295	0.978974	0.983616	1.00131	1.02206	0.999499	1.0017	1.00147	0.987925	0.994816	1.00091	0.989072	0.9889	0.983146	0.979886	0.983797	0.988855	0.989281	0.99351	1.00902	1.00175	1.00324	1.00247	0.995875	0.979919	0.96925	0.989163	0.998088	1.00348	0.984085	0.9869	1.00717	0.973844	0.99225
	1.35115	1.00038	1.0044	0.996266	1.00146	1.00431	0.994323	0.988774	1.00011	0.992312	1.00014	0.988573	0.983464	1.00558	1.00957	0.982272	0.981167	0.986131	0.992169	1.00459	1.0041	0.99851	0.993396	1.00033	0.987324	0.983253	0.993393	0.984678	0.99274	0.999932	0.980021	0.987916	1.0082	0.997073	0.999042	0.992636	1.00557	0.999716	1.00266	0.976779	0.981464	0.993679	0.990169	0.996336	0.985318	0.988364	0.98789	0.983513	1.00097
	1.35103	1.00844	1.00281	0.992133	1.00261	1.01119	0.997885	1.00623	0.986466	0.992956	1.00759	0.980424	0.996237	0.999145	0.989722	1.00043	0.982106	0.99862	0.999445	1.00265	0.993433	1.00063	0.990259	0.988275	0.992022	0.980988	0.991505	0.982265	0.988925	1.00223	0.997616	0.982683	0.986543	0.989318	1.01239	0.998889	1.00406	1.00148	1.00053	0.98513	0.980955	0.992576	0.996372	0.995032	0.987428	0.989166	0.99198	0.985065	0.991303
	1.35092	1.00224	0.997883	1.00042	1.0032	1.00374	1.0044	0.984742	0.99044	1.00026	1.0075	0.983112	0.9885	1.00301	0.986598	0.980306	0.976398	0.994147	0.999177	0.997673	0.995869	1.00194	1.00231	0.99324	0.992896	0.97175	0.989046	0.998759	0.993282	0.98919	0.988821	0.996922	0.984118	1.00878	0.989338	0.994812	1.00865	0.996696	1.00347	0.986779	0.971119	0.979324	0.985251	0.998903	0.994192	0.989891	0.996406	0.968927	0.992141
	1.3508	0.998281	1.00443	1.00056	0.999861	0.993724	0.998316	0.989446	1.00427	0.998178	1.00537	0.980678	0.991117	0.995823	0.998641	0.972747	0.975798	0.988193	1.00581	0.994718	1.0011	0.999826	0.996559	0.982842	0.990657	0.996445	0.980962	0.981054	0.992273	0.980761	0.988711	0.9814	0.985827	1.00125	0.994036	0.991866	0.997776	1.00372	1.00168	0.978439	0.97933	0.963845	0.99688	0.991404	0.994225	0.986096	1.00455	0.979486	0.987135
	1.35069	0.999333	0.986131	1.00122	0.994378	0.98618	0.992651	0.997181	0.993221	0.987455	0.995634	0.977519	0.993772	1.00514	1.01051	0.984352	0.971599	0.994246	0.991141	1.00482	0.994575	1.0013	0.987824	0.986604	0.991125	1.00315	0.9804	0.989007	0.984649	0.994758	0.990347	0.986854	0.983948	1.00142	0.999137	0.983676	1.00262	1.00865	0.997149	1.00093	0.975148	0.973824	0.993187	1.00401	0.992844	0.988182	0.994809	0.978187	1.00007
	1.35058	0.992257	0.992194	1.00911	0.996556	1.00513	1.00156	1.00238	0.986332	0.984633	0.999665	0.988415	0.984628	1.00126	0.991804	0.984018	0.984603	0.999111	0.990587	0.994833	0.996715	0.988127	0.990097	0.989518	0.991554	0.998974	0.994852	0.991095	0.983071	0.991566	0.97955	0.987485	0.990131	0.989815	0.987276	1.00084	0.99656	0.98672	0.995902	1.00138	0.98216	0.969868	0.999202	0.999453	1.00406	0.981851	0.998964	0.990521	0.985019
	1.35046	0.99579	0.994926	1.12363	0.983584	1.00153	1.00525	0.998292	0.994616	0.999896	0.990239	0.977088	0.991938	0.990071	0.988427	0.968234	0.978898	0.997342	1.01197	0.996864	0.983177	0.995089	0.98366	0.992894	0.990041	0.996718	0.985107	0.974249	0.974571	0.992425	0.983323	0.981378	0.993485	0.99834	0.994202	0.99026	0.987261	0.995774	0.999973	0.988247	0.987298	0.978938	0.996506	0.996126	1.0155	0.983489	0.988961	0.992435	1.00109
	1.35035	0.992295	0.999848	1.00746	1.0041	0.995408	1.00621	1.00491	0.989362	0.992002	0.994978	0.980165	1.00026	1.00036	0.997059	0.984554	0.992016	0.995799	0.997584	1.00697	0.997366	1.00272	0.997641	0.988956	0.986315	0.979959	0.985217	0.974979	0.987448	0.98	0.987495	0.972042	0.977217	0.99652	0.994133	0.994733	1.00288	0.981551	1.00344	0.997288	0.996352	0.973823	0.989739	1.0057	1.00698	0.982282	0.991612	1.00169	0.99987
	1.35023	1.00805	1.01476	1.00048	1.00441	1.00898	0.9942	0.987336	0.99665	1.00429	0.990918	0.978072	0.990378	0.995919	0.990784	0.982994	0.986508	0.998977	0.99452	0.985647	1.00397	0.99673	0.997411	0.992757	0.988011	0.96603	0.982797	0.981317	0.970564	0.977293	0.990771	0.97418	0.971597	0.982894	0.973616	0.992209	1.01105	1.00468	0.980105	0.999407	1.00228	0.975271	0.987586	0.994799	0.990579	0.991336	0.989776	0.996721	1.00299
	1.35012	0.996297	0.993511	1.00125	1.00128	1.0053	0.99183	0.992945	1.00221	1.00786	0.996424	0.98434	0.993098	1.00285	0.984376	0.981523	0.999078	1.00141	1.00074	0.999811	0.986337	0.986362	0.983726	0.986218	0.976168	0.988909	0.985567	0.970356	0.992409	0.98093	0.97811	0.970905	0.982052	1.0009	0.97593	0.984144	1.0028	0.979473	1.00791	1.00517	1.00416	0.968744	0.990643	0.979265	0.984752	0.993381	0.991394	0.991407	0.979329
	1.35	0.986976	0.992566	0.988559	0.993004	0.996126	0.99583	0.995904	0.995539	0.991651	0.995707	0.996801	0.994626	0.99118	0.984164	0.970248	1.00396	0.999096	0.990023	0.998497	1.00225	0.988041	0.997671	0.979611	0.97472	0.970725	0.984588	0.985773	0.997159	0.97444	0.980378	0.966596	0.982307	0.98736	0.985339	0.996245	0.99461	0.991194	0.988468	0.992246	1.00269	0.982246	0.966544	0.995964	1.00769	0.99969	0.979839	0.972485	0.99226
	1.34989	0.996753	0.994699	0.999368	0.994142	1.00361	0.999695	0.998889	0.988865	0.998494	0.989121	0.981994	0.995622	0.99882	0.97777	0.976825	1.00057	1.00468	1.00241	0.999214	0.999386	0.991986	0.985464	0.984551	0.978678	0.986251	0.968147	0.980908	0.984599	0.981202	0.991794	0.980148	0.968222	0.984035	0.986734	0.997285	0.987741	0.998933	1.00503	0.999189	1.00556	0.984041	0.982853	0.991645	0.997534	0.987523	0.982288	0.986167	0.98512
	1.34978	0.997271	0.99649	1.00372	0.998893	0.997611	0.993177	0.998766	0.992024	1.00334	1.00177	0.985621	0.996348	0.990912	0.976865	0.980837	0.987695	1.00383	1.01074	1.00314	0.99715	0.9919	0.991953	0.990872	0.976486	0.971432	0.97657	0.96516	0.961116	0.97706	0.978063	0.976683	0.975586	0.988703	0.972661	0.986036	0.996468	1.00258	0.996138	0.991991	0.987196	0.988826	0.971312	0.99382	0.997567	1.00312	0.989413	0.975975	0.994675
	1.34966	0.995419	1.0006	1.00068	0.986804	1.0116	1.0016	1.00871	0.985741	0.999541	0.992222	0.981268	0.992178	0.995984	0.990942	0.990432	0.996406	1.00754	0.985612	1.00309	0.996669	0.983065	0.991933	0.981578	0.972084	0.979721	0.976809	0.976669	0.989056	0.977499	0.979492	0.975928	0.985706	0.983141	0.988845	0.98257	0.998678	0.988418	0.994837	0.993495	1.01144	0.994691	0.981976	1.00034	0.989198	0.984091	0.991797	0.9878	0.994159
	1.34955	0.997227	0.998451	0.99957	1.00277	1.0018	0.992386	0.994697	0.986618	0.999258	0.990283	0.990163	1.00207	0.988445	0.963759	0.992568	1.00123	1.00808	0.992957	0.996937	0.985722	0.990374	0.982054	0.963067	0.975657	0.966306	0.963534	0.971534	0.961194	0.967384	0.962932	0.980796	0.965064	0.98345	0.984067	0.989566	0.988747	0.99431	0.998124	1.01141	0.992529	0.992643	0.973813	0.985331	0.996235	0.993647	0.977085	0.987767	0.986941
	1.34944	1.00058	0.994129	1.00957	1.00488	1.0065	1.00058	0.993111	0.992749	0.997472	0.992646	0.983793	0.998645	0.991881	0.971449	0.993787	0.999469	0.997115	1.00315	0.990874	0.984318	0.988563	0.974821	0.978315	0.96003	0.973757	0.957939	0.96618	0.95283	0.961585	0.952902	0.969347	0.974447	0.985808	0.984895	0.998473	0.990142	1.00275	0.999971	1.00595	1.00814	0.996866	0.970376	0.99172	0.989537	1.00174	0.988536	0.990642	0.986791
	1.34932	0.989139	0.996905	0.995945	1.00651	1.00712	0.989471	0.984422	0.99346	0.993666	0.991958	0.977072	0.995514	0.987441	0.972051	0.999105	1.01107	1.00867	0.999272	0.986055	1.01098	0.979231	0.989041	0.978944	0.970998	0.960664	0.956745	0.968658	0.944618	0.957124	0.971305	0.976906	0.959202	1.00319	0.993519	0.988341	0.992743	0.994617	0.998025	0.987202	1.0106	0.991923	0.985612	0.988962	1.00472	1.00076	0.984075	0.983127	0.991053
	1.34921	1.00123	0.994729	1.00525	0.994208	1.00065	0.997571	1.00627	0.990552	1.0038	0.98882	0.99183	0.989748	0.981092	0.978154	1.00336	0.999181	1.01483	0.993948	0.988895	0.980456	0.983941	0.965236	0.991808	0.97214	0.960099	0.970447	0.963104	0.973157	0.958841	0.952366	0.97373	0.969288	0.986663	0.984149	0.975331	0.998946	0.993566	0.999652	0.999364	1	1.00533	0.989392	0.983589	0.986598	0.991986	0.989395	0.983655	0.985274
	1.34909	0.992309	0.996193	0.995045	0.994089	1.0001	1.00899	0.989638	0.992843	0.986593	0.995044	0.994563	0.990426	0.982795	0.986313	0.98889	0.988176	1.00436	0.998935	0.996899	0.996729	0.991357	0.983969	0.976681	0.955579	0.962143	0.954688	0.966517	0.961309	0.960647	0.961317	0.969615	0.966464	0.972629	0.977844	0.980035	0.988565	0.992544	0.993279	1.00505	0.998422	1.00304	0.991711	0.974838	0.994088	0.990369	0.988596	0.991174	0.999144
	1.34898	1.00229	1.00782	0.999564	1.00112	0.995722	0.983276	1.00087	0.992969	0.989219	0.990172	0.996003	0.996947	0.969083	0.98929	1.00805	0.992212	0.999174	0.994711	0.982035	0.981386	0.988531	0.97445	0.978015	0.958954	0.9788	0.968564	0.972991	0.962744	0.964471	0.976468	0.961112	0.968108	0.975218	0.971364	0.979381	0.985836	0.984711	1.00481	0.994259	1.00479	0.993025	0.978114	0.991402	0.969048	0.998496	0.995319	0.970706	1.00162
	1.34887	0.987346	0.998438	0.996049	0.991278	0.993746	0.990421	0.981387	0.98996	0.991319	0.989587	0.98843	0.995222	0.971336	0.991475	0.998231	1.00543	0.999221	0.998525	0.986032	0.98043	0.972332	0.970065	0.958267	0.962087	0.967805	0.961258	0.959588	0.974316	0.969153	0.969385	0.967097	0.956168	0.968403	0.979195	0.9706	0.985575	0.992956	0.988334	0.993321	1.01328	0.995709	0.993837	0.968309	0.98204	0.989284	0.996787	0.97538	0.989703
	1.34875	0.993132	0.994434	1.00204	0.998272	0.997071	1.00403	0.988671	0.987065	0.991301	1.00257	0.986829	0.98447	0.978388	0.999066	0.996022	0.995917	1.00361	0.985243	0.991581	0.976361	0.979036	0.962532	0.957628	0.952846	0.957781	0.969194	0.975256	0.984115	0.957685	0.968427	0.968934	0.965909	0.967094	0.97659	0.977281	0.981502	0.986984	0.97817	0.986301	1.00961	1.00416	1.00684	0.971134	0.9938	1.00201	0.999186	0.969631	1.00028
	1.34864	0.990527	1.00097	1.00122	0.989405	0.987934	0.999722	0.987546	1.00472	0.989006	0.994718	0.986248	0.995044	0.973434	0.996987	0.995215	1.00833	0.99576	0.999842	0.978882	0.977453	0.978134	0.984042	0.960764	0.959552	0.977275	0.970764	0.97126	0.957252	0.971664	0.952212	0.96762	0.966993	0.967289	0.969585	0.977295	0.980318	0.980179	0.983727	0.98805	0.998696	0.994427	1.00317	0.978361	0.987957	0.995932	0.991303	0.981264	0.999238
	1.34853	0.995995	0.998411	0.999506	0.996973	0.98964	1.00238	0.984833	0.993933	0.980172	0.997156	0.987611	0.997721	0.97569	0.992362	1.00202	0.994736	0.993345	0.981498	0.989748	0.971213	0.969025	0.967386	0.953632	0.963306	0.964139	0.975801	0.971788	0.979579	0.96775	0.965638	0.963689	0.977512	0.965822	0.965431	0.972661	0.98226	0.985908	0.999957	0.999223	0.993081	0.992628	0.992361	0.991492	0.993369	1.00339	0.989341	0.97723	0.999381
	1.34841	0.997875	0.993863	0.997609	0.996793	0.993474	0.998277	0.988919	1.0035	0.99311	1.00231	0.982633	0.986452	0.979588	1.00576	1.00404	1.0019	0.990453	0.978706	0.980771	0.975453	0.964492	0.973899	0.972305	0.966622	0.971834	0.978088	0.966131	0.985682	0.975493	0.97527	0.972319	0.97041	0.966721	0.968441	0.971777	0.985283	0.977571	0.999944	0.988914	1.00527	1.0149	1.00686	0.973674	0.995388	0.991637	1.00044	0.979028	0.998193
	1.3483	0.994108	0.997303	0.987249	0.995861	1.00693	0.989971	0.986835	0.997299	1.00145	1.01187	0.996554	0.988942	0.993168	0.999009	1.0016	0.98701	0.992868	0.989376	0.981329	0.969914	0.991434	0.960915	0.981607	0.983113	0.969111	0.985605	0.983494	0.984868	0.977216	0.977706	0.983229	0.976982	0.949159	0.970739	0.973874	0.974371	0.987516	0.985902	0.994684	1.00133	1.0027	0.997736	0.987023	0.980688	0.984328	1.00719	0.978667	1.00097
	1.34818	1.00029	0.997913	1.00016	1.0007	0.997702	0.996698	0.996336	0.986974	0.98066	1.00483	0.986708	0.979981	0.993126	1.00682	0.994665	1.00069	0.989887	0.98197	0.989765	0.966098	0.973649	0.978684	0.961591	0.973158	0.9746	0.983242	0.992275	0.992003	0.988265	0.972191	0.981762	0.974175	0.960083	0.965672	0.968991	0.978578	0.97559	0.991483	1.00009	1.00437	1.00103	0.994409	0.997308	0.97961	0.990471	0.995695	0.97658	0.982021
	1.34807	0.997103	1.00137	1.0094	0.997935	0.997197	0.988249	0.992032	0.99203	0.98485	0.999669	0.977479	0.990159	0.986836	1.00195	1.00448	0.99151	0.997749	0.981442	1.00063	0.984691	0.967698	0.978824	0.974221	0.975033	0.980127	0.981192	0.99071	0.996868	0.975486	0.981214	0.97315	0.971691	0.965305	0.971418	0.959431	0.972319	0.989446	0.987413	0.988883	0.996827	0.996992	1.00023	0.989824	0.986492	0.988071	0.993004	0.988653	0.99114
	1.34796	0.996032	1.00374	1.00426	1.00466	0.998201	0.986256	0.993917	0.986423	0.995585	1.00579	0.98295	0.979241	0.995253	1.00265	1.00111	0.981078	0.990514	0.989806	0.987813	0.967964	0.972695	0.965878	0.97305	0.963981	0.986133	0.986502	0.995713	0.983569	0.987464	0.988675	0.985876	0.975926	0.976693	0.974989	0.963703	0.965596	0.978174	0.990887	0.99907	0.995856	1.00343	0.996344	0.995423	0.979238	0.98837	1.00379	0.975972	0.978338
	1.34784	0.992865	0.99718	1.00987	0.991553	1.00172	0.999028	0.992885	0.990135	0.993874	1.00397	0.986701	0.982597	0.993338	0.995062	1.00351	0.995017	0.988218	0.994803	0.976927	0.971672	0.968383	0.978711	0.979015	0.970821	0.995787	0.982871	0.991692	0.978785	0.985758	0.990825	0.982475	0.99145	0.969619	0.974114	0.972121	0.973748	0.963862	0.982286	0.97573	0.991753	0.986114	1.01066	1.00431	0.977047	1.00035	1.00647	0.984532	0.986545
	1.34773	0.991808	0.996502	1.00447	1.00271	1.00287	0.993291	0.997408	0.992388	0.995712	0.996062	0.977	0.979588	0.982739	0.994212	1.00243	0.995342	0.982959	0.994159	0.965709	0.956114	0.976761	0.976408	0.973534	0.97307	0.993367	0.989914	1.00257	0.990985	0.999166	0.98336	0.982671	0.970589	0.977026	0.981056	0.962588	0.975009	0.968694	0.983202	0.979416	0.989055	0.989744	0.993669	0.999719	0.987912	0.986299	0.998866	0.982573	0.990211
	1.34762	0.993769	0.993926	1.00894	0.990906	1.00308	0.9954	1.00012	0.978522	0.997041	1.00252	0.97898	0.977186	1.00493	0.990356	0.993424	0.99432	0.998192	0.981288	0.98	0.966697	0.971194	0.967122	0.980023	0.978602	0.984131	0.987311	0.98995	0.997665	1.00359	0.994115	0.987921	0.98203	0.984988	0.970517	0.972291	0.969564	0.977787	0.998195	0.984345	1.00755	0.99832	0.999362	1.00159	0.981345	0.98436	0.991712	1.00082	0.985328
	1.3475	0.986121	0.986019	0.9949	0.991786	0.997089	0.980525	0.990545	0.986738	1.00513	1.00575	0.970385	0.983296	1.00818	1.00118	0.989058	1.00107	0.97878	0.984765	0.965382	0.966529	0.965476	0.976124	0.988744	0.987652	0.993561	0.998033	0.999219	0.988187	0.988111	0.985697	0.983891	0.991561	0.984553	0.9791	0.964593	0.967054	0.964576	0.987094	0.963269	0.989881	1.00654	1.00317	0.997819	0.985688	0.984469	0.994511	0.990454	0.986441
	1.34739	0.995866	0.997268	0.994505	0.99033	0.992616	0.994257	1.00438	0.977589	1.00661	0.985915	0.969474	0.992541	0.995635	1.01346	0.996909	0.997545	0.997651	0.980745	0.972607	0.974464	0.97737	0.980263	0.994934	0.98631	0.980215	0.985245	1.00673	0.990828	0.991726	0.986692	0.983681	1.00448	0.986032	0.966205	0.978283	0.974119	0.961976	0.980842	0.982494	0.991253	1.00232	0.999092	0.99942	0.998997	0.975231	0.994021	0.990695	0.982259
	1.34728	0.993717	0.998445	0.992309	0.994867	0.995964	0.987085	1.0049	0.980657	1.00738	0.997578	0.97643	0.993839	1.00633	1.00514	0.996512	0.996179	0.990495	0.97143	0.970643	0.980885	0.973777	0.990694	0.978203	0.989803	0.981369	1.00197	0.990074	0.99312	0.987349	1.00214	1.00785	0.991976	0.994628	0.976158	0.973075	0.982638	0.963646	0.982262	0.986287	0.991111	0.998529	1.00068	1.00084	0.993792	0.975134	0.99157	0.979248	0.979953
	1.34716	0.985582	0.997449	0.99041	0.995262	0.984481	0.99414	1.00519	0.987037	1.00264	1.00074	0.972345	0.97612	1.00225	1.00867	0.975116	0.985366	0.977517	0.985132	0.971273	0.97805	0.98098	0.987677	0.988434	0.987401	0.994073	0.988312	1.00701	0.995218	0.989055	1.00376	0.989417	0.998303	0.991681	0.972273	0.99263	0.962401	0.966927	0.987027	0.987423	0.984457	0.978985	1.00681	0.999605	0.999798	0.968742	0.991525	1.00053	0.984046
	1.34705	0.987268	0.991404	0.998768	0.990072	1.00334	0.989625	1.00576	0.98044	1.00063	1.00076	0.96918	0.985597	0.998593	0.988353	0.988798	0.973833	0.982719	0.967723	0.975461	0.979581	0.974138	0.997926	0.992022	1.00057	0.980706	0.996517	0.986801	1.00112	1.00067	0.996772	1.004	0.988941	0.985571	0.98944	0.980394	0.9771	0.964092	0.974111	0.989598	0.992584	0.988589	1.00645	0.999185	0.997432	0.980145	0.988071	0.999916	0.992124
	1.34694	0.988779	0.994616	0.999754	1.00188	0.993913	0.9991	0.995565	0.984382	0.994281	0.977961	0.96367	0.990698	1.0045	1.00705	0.997824	0.996315	0.986197	0.982823	0.97825	0.986238	0.983118	0.997624	0.990435	1.00402	1.004	0.994333	1.00018	1.00016	1.00809	1.00063	0.99396	0.98049	0.995074	0.996307	0.993159	0.965959	0.97248	0.975696	0.975747	0.982631	0.994009	1.00087	1.00678	0.999905	0.9767	1.00124	0.994553	0.99037
	1.34682	0.9855	0.991571	1.00316	0.995299	0.999647	1.00107	0.993186	0.990846	1.00449	0.990166	0.957806	0.990861	1.00669	1.00492	0.990473	1.00356	0.983926	0.975174	0.968382	0.971356	0.980309	0.990187	0.988297	0.996044	0.994544	0.991651	1.00361	0.993953	1.01277	0.997913	0.997114	0.995845	0.995399	1.00143	0.980599	0.976269	0.96025	0.968513	0.975125	0.982	0.987708	1.00091	1.00278	0.992914	0.97719	0.990372	0.984473	0.994963
	1.34671	0.995031	0.994379	0.994593	0.986495	0.992421	0.99407	0.978137	0.992256	0.990713	0.987616	0.972311	0.990663	1.01274	0.994059	1.00105	0.978274	0.976637	0.97381	0.972185	0.974206	0.98081	0.9858	0.993455	0.988129	0.998768	0.998516	1.00122	1.01639	0.985153	1.00442	0.993014	0.997163	1.00622	0.992225	0.998144	0.984424	0.963654	0.983809	0.977202	0.981017	0.990743	1.00014	1.0084	0.997678	0.996889	0.99981	0.991742	1.00699
	1.3466	1.00187	0.990746	1.00928	0.998394	1.00038	0.998634	0.994588	0.992994	1.00173	0.996665	0.973605	1.00389	1.01375	0.99915	0.999532	0.97058	0.985509	0.98262	0.974684	0.971921	0.979311	0.997024	1.00111	0.993447	0.998309	1.00146	0.999349	1.00462	1.00048	0.992176	0.992951	0.985989	1.00047	0.989741	0.990337	0.986206	0.965707	0.986295	0.991051	0.986589	0.987194	1.00621	0.994804	1.00637	0.98572	0.978514	0.984728	1.00056
	1.34648	0.988921	0.98808	0.989201	0.991051	0.991377	0.995013	0.99013	0.994051	0.991733	0.996451	0.973292	0.992388	1.00436	0.993341	0.988487	0.993875	0.978415	0.978418	0.973268	0.986239	0.993901	0.988773	0.989288	0.992196	1.00459	1.00931	1.00521	1.00677	1.00103	1.00552	0.994333	1.00158	1.00652	1.00152	0.993511	0.979106	0.974136	0.968253	0.976334	0.987283	0.995266	0.997849	0.995512	0.989685	0.984295	0.977495	0.988144	0.986612
	1.34637	0.992399	0.988931	0.997577	0.987667	1.00549	1.00842	0.987593	0.995498	0.996053	0.98879	0.975111	1.00403	0.998393	1.00045	0.994858	0.987083	0.9764	0.977811	0.977108	0.987444	0.992879	1.00491	0.986973	0.997077	1.00456	1.00136	0.991792	0.998763	1.0028	0.990713	1.00301	1.00458	0.99883	0.995129	0.983074	0.980872	0.989231	0.967211	0.974242	0.985364	0.984434	0.977277	1.00309	1.00752	0.999236	0.974544	0.989913	0.99221
	1.34626	0.9935	0.988267	0.996635	0.981659	1.00778	0.994145	0.988093	1.00192	0.991464	0.991006	0.993899	1.00353	0.99541	0.998818	0.998922	0.978906	0.973228	0.966059	0.976018	0.974749	0.993164	0.979493	1.0136	0.989716	1.00722	1.00967	0.994457	1.01724	0.992794	0.997556	0.981278	0.996358	0.999074	0.990801	0.989914	0.985818	0.976991	0.977786	0.960689	0.973752	1.00051	0.993222	0.988047	0.997123	0.986353	0.981982	0.980746	1.00315
	1.34614	0.994487	0.989374	1.0113	0.993745	0.996328	0.99735	0.976544	0.994689	0.998918	0.98433	0.986615	0.996336	1.00336	0.99284	0.992109	0.986944	0.976104	0.972272	0.975741	0.989284	1.0049	1.00337	1.0005	1.01132	0.996216	0.997429	0.996818	0.990872	1.01473	1.00923	1.01011	0.994956	0.994199	0.996965	0.993179	0.976752	0.96966	0.966403	0.962118	0.978148	0.987112	0.983752	0.995992	1.00748	0.99875	0.983333	0.968188	1.00462
	1.34603	1.00455	0.989948	0.99823	0.987763	0.99261	0.996757	0.983876	0.999224	0.990326	0.983318	0.983242	0.993972	1.00058	0.996508	0.991101	0.972198	0.965408	0.97887	0.981864	0.986575	0.998283	0.998116	0.998062	0.991678	1.00429	0.993308	1.00115	1.00039	1.00832	1.00163	0.999873	1.00047	0.999145	0.99896	0.996451	0.992134	0.968921	0.963912	0.967753	0.989667	0.984959	0.992648	1.0015	1.00944	0.990972	0.975256	0.984945	0.994969
	1.34592	0.990411	0.988722	1.00754	0.991737	0.99313	0.990009	0.982099	1.01039	1.00437	0.979051	0.980787	0.991125	1.00458	0.987981	0.986116	0.979214	0.976075	0.971209	0.973165	0.978879	0.999932	0.995013	0.985501	0.998069	1.02481	1.00369	1.01275	1.00449	0.99793	1.00986	1.01222	1.00041	1.00146	0.988541	1.0101	1.00056	0.988707	0.971153	0.963775	0.986417	0.991132	0.994064	0.994208	1.00248	1.00182	0.977548	0.982226	1.0087
	1.3458	1.01155	1.00492	0.995842	0.990548	0.99654	0.986625	0.995924	0.99706	0.987186	0.984168	0.996144	1.00692	0.999389	0.99114	0.992216	0.972343	0.982581	0.988199	0.991246	1.00123	0.998001	0.989668	0.996249	1.00707	1.00346	0.998947	0.997305	0.995114	1.00705	1.0139	1.00038	1.01615	0.998222	1.00306	1.00109	0.994487	0.99566	0.963185	0.963053	0.983856	0.985655	0.999202	1.00106	0.999255	1.00392	0.987681	0.978909	1.00277
	1.34569	0.991764	1.00361	0.998639	0.995789	0.986268	0.999731	0.985181	0.988898	0.984073	0.986828	0.989063	1.00835	0.998875	0.999167	0.988813	0.976936	0.965068	0.986931	0.991694	1.00533	1.00013	1.00583	1.01146	1.00463	1.00603	0.999383	0.982957	0.998653	1.00643	1.00942	1.0059	1.00153	1.00107	1.00566	0.993857	0.995274	0.984078	0.980085	0.962929	0.98187	0.983629	0.9908	1.0017	1.01554	0.995145	0.972683	0.987418	0.989343
	1.34558	0.989133	0.996522	1.02619	1.00299	0.993474	0.987661	0.996003	0.994896	0.990368	0.998251	0.996924	0.997481	1.00093	1.00676	0.986517	0.979204	0.971447	0.983458	0.99607	1.00492	0.993431	1.00725	1.01613	1.00762	1.00595	1.00143	1.01282	0.996872	1.02088	1.0042	0.997427	0.987505	1.00151	1.00927	1.00337	0.998573	1.00391	0.976586	0.972856	0.97231	0.984288	0.993587	0.9947	0.997647	0.991757	0.984188	0.989925	0.993851
	1.34546	0.986449	1.00016	1.00718	0.990557	1.00261	0.99431	0.992474	1.00421	0.984961	1.00139	0.999878	0.999093	0.989119	0.991752	0.9776	0.967274	0.973986	0.989085	0.998764	0.988948	1.00001	1.00998	0.999987	1.01435	1.00602	1.00581	0.997342	0.998079	1.00597	1.02035	0.99976	1.00939	0.995135	1.00513	0.992861	0.991582	0.987784	0.974487	0.96481	0.9799	0.976285	0.989133	0.992028	1.00881	0.994072	0.988429	0.961246	1.00181
	1.34535	0.990418	0.990997	1.00367	0.991649	0.990223	0.993253	0.999468	0.985994	0.986198	1.00275	0.986746	0.996001	0.997039	1.00258	0.978761	0.966944	0.968216	0.986383	1.0075	1.00708	0.997993	0.997947	0.997845	1.01493	1.00957	1.00287	1.00387	1.00046	1.00007	1.01537	0.993904	1.0091	1.01056	1.0073	1.01178	1.00532	0.996354	0.980069	0.968653	0.976346	0.972429	0.98504	0.995582	1.01561	1.00468	0.982945	0.974362	0.984076
	1.34524	0.996216	0.982922	0.998577	0.988002	1.00745	0.991687	0.992468	1.00098	0.976431	0.989471	0.995051	1.00425	1.001	0.991999	0.992413	0.975956	0.975828	0.987713	0.990833	1.00283	1.00261	0.999127	0.994958	0.994899	1.0077	0.9947	1.00393	1.00464	1.00595	1.00495	1.00468	1.01137	1.00714	1.00578	1.00426	1.00021	0.982457	0.988025	0.967314	0.980614	0.974469	0.993058	0.981279	1.00195	0.997098	0.996723	0.967438	0.992132
	1.34513	0.982088	0.992836	1.00523	1.00035	1.00298	0.989386	0.992362	0.989195	0.979903	1.00184	0.989256	0.996705	0.990917	0.987438	0.990539	0.978876	0.989237	1.00143	1.00614	0.995631	0.987261	0.993223	1.00398	1.00751	0.998574	0.998846	1.0011	1.02051	1.0071	1.01068	1.00772	1.00856	0.996023	1.00652	0.993003	1.00841	0.98187	0.984799	0.976615	0.966083	0.984148	0.983891	0.990066	0.997261	1.0052	0.996155	0.970162	0.994961
	1.34501	0.984547	0.985523	0.999105	0.98152	1.00252	0.9809	1.0061	0.98652	0.97946	0.996378	0.984703	0.99139	1.0026	0.976825	0.977399	0.972957	0.984613	0.993124	1.00648	1.00767	1.0023	1.00157	1.00574	1.01227	0.998021	1.00818	1.00085	1.00351	1.0126	1.01343	1.00143	1.00728	1.00368	0.998164	1.00418	0.990401	0.995808	1.0022	0.968818	0.978161	0.967611	0.988089	0.989485	0.996381	1.00392	0.990456	0.975517	1.00128
	1.3449	0.990752	0.992938	0.988673	0.992119	1.00468	0.994403	1.00861	0.99662	0.982997	1.00717	0.995479	0.999784	0.986575	0.989469	0.976914	0.974795	0.976093	0.979422	1.00723	0.993059	1.00713	1.00743	0.999723	1.00845	0.998301	1.0038	1.00789	1.02173	1.00703	1.01297	0.997526	0.994194	0.999395	1.0004	1.01124	1.00398	1.0001	0.987537	0.973915	0.970473	0.97292	0.976159	0.992339	1.00606	0.992943	1.00485	0.981148	0.996847
	1.34479	0.991063	0.991115	0.989562	0.990286	1.00177	0.98541	0.99496	0.994291	0.98494	1.00655	0.991537	1.00175	0.992754	0.976904	0.975664	0.974082	0.98532	1.00593	0.998606	1.0019	1.00533	0.998658	1.01349	1.01482	1.00248	0.998533	1.00267	1.01326	1.00004	1.02031	1.0082	1.00525	1.00214	1.00545	1.00004	1.00408	0.994729	0.987386	0.988963	0.979572	0.976442	0.974205	0.988323	0.989538	0.996493	0.995125	0.974104	0.987759
	1.34467	0.995869	0.988938	0.994509	0.993985	1.00511	0.989559	0.994302	1.00221	0.977265	0.990898	0.99784	0.996776	0.984132	0.986676	0.984415	0.979667	1.00065	0.993888	0.985775	1.00755	0.99829	1.00145	1.01706	1.00463	1.0055	1.00109	1.01422	1.00282	1.00512	0.991528	1.00418	0.998682	1.0067	1.00539	1.0221	0.998028	0.990257	0.995582	0.974895	0.974312	0.976043	0.985979	0.987746	0.999375	0.998292	1.0189	0.980052	0.989135
	1.34456	1.00023	0.996105	0.993408	0.981558	0.990866	0.98429	1.00118	0.992726	0.991986	1.01065	0.990335	0.99539	0.986601	0.978383	0.968212	0.971754	0.98428	0.997556	1.0063	1.00982	1.00954	0.999189	0.993518	1.01305	1.00921	1.0187	1.00809	1.01698	1.00083	1.01519	1.00548	0.99638	0.994934	1.0028	1.00198	1.00528	1.00671	0.986089	0.981203	0.978028	0.971801	0.986386	0.988081	1.00761	1.00221	0.999762	0.974702	0.989768
	1.34445	0.986608	0.980657	0.992014	0.990136	0.997401	0.995001	1.00268	0.980823	0.989141	1.00432	0.986212	0.992709	0.989528	0.975198	0.970136	0.97223	0.989514	0.996188	1.003	1.00882	0.99788	1.00669	1.00674	1.00676	1.00511	1.00854	0.988447	0.994023	1.01239	1.00709	1.00663	1.01171	0.995571	1.00893	1.01364	0.99502	0.993027	0.98908	0.98325	0.980064	0.960504	0.983792	0.987654	0.995443	0.995888	1.00375	0.974701	0.992885
	1.34433	0.991998	0.989488	0.988321	0.997681	1.00974	0.996694	1.00148	0.9852	1.004	1.01511	0.979879	0.989332	0.997463	0.987314	0.976014	0.981632	0.987948	1.00447	1.01591	0.993625	0.997591	1.00475	1.002	1.0188	1.01323	1.00086	1.02066	1.0039	0.988238	1.00515	1.00705	0.998597	1.00722	1.0109	1.00735	1.00041	1.00832	0.994945	0.978235	0.975747	0.96341	0.977697	0.987451	0.992855	0.991258	1.00002	0.977273	0.978113
	1.34422	0.993519	0.986533	0.989821	1.00049	0.992422	0.995011	0.99613	0.983732	1.00042	0.997054	0.999494	0.998985	1.00294	0.98333	0.96836	0.97595	0.988492	1.00308	0.999944	0.990757	1.00438	1.02713	1.00885	1.01047	1.01693	1.01183	1.00642	1.00435	1.0034	1.00703	1.00839	1.003	1.00712	1.02629	1.01247	1.01314	0.997728	0.998638	0.994579	0.983789	0.966389	0.961174	0.987328	0.989672	0.994249	1.0116	0.974436	0.976694
	1.34411	0.991218	1.00022	0.996244	1.00201	0.986702	0.992355	0.994804	0.982689	1.0002	1.0034	0.985747	0.992447	0.985701	0.97522	0.969122	0.979628	0.996287	0.999599	0.995937	1.00294	1.00574	1.00924	1.00244	1.00817	0.991401	1.01261	1.00608	0.994469	1.00606	0.991058	1.03055	1.00566	0.998891	1.00319	1.00939	1.01444	1.00014	0.994803	0.993904	0.990324	0.971656	0.9699	0.987473	0.988359	0.990831	0.991109	0.98994	0.978394
	1.344	0.993108	1.00375	1.00159	0.997548	0.994991	0.993848	1.00207	0.97795	0.990883	1.00846	0.977967	0.997052	0.977791	0.9755	0.983463	0.974149	0.997298	1.01261	0.997703	1.01361	1.02216	0.99723	1.01835	1.00983	1.00286	1.006	1.01925	0.998537	0.998812	1.01086	1.00463	1.00684	0.995801	1.00404	1.02151	0.998066	0.995235	1.00778	1.00136	0.983613	0.978608	0.977356	0.977575	0.995763	0.984262	1.00775	0.987153	0.97164
	1.34388	0.993835	1.00052	1.00619	0.99747	0.988951	0.996253	0.993905	0.980921	1.0026	1.01266	0.990814	0.991834	0.978977	0.98221	0.978178	0.982195	0.999637	0.997197	1.00652	1.00568	1.0034	1.00003	1.01036	1.00431	0.998764	1.0233	1.00797	1.00127	0.995783	1.01951	1.02275	1.01101	1.00742	1.01023	0.999661	0.999196	0.997264	1.01055	1.0048	0.982638	0.97568	0.963968	0.973565	0.984293	0.994484	1.00793	0.996547	0.992505
	1.34377	0.992019	0.991399	1.00746	1.00146	0.998588	1.01007	0.998442	0.97022	1.00163	1.00044	0.98642	0.991529	0.973271	0.983288	0.978798	0.991616	0.996712	1.00698	0.998102	0.998177	1.01043	0.99658	1.01038	1.0032	1.01573	1.01192	1.01075	0.999479	0.998893	1.00252	1.01172	0.99905	1.01878	1.01341	1.00603	1.01139	0.991943	0.993757	1.00515	0.976619	0.981988	0.96695	0.977237	0.989466	0.994584	0.996108	0.986259	0.967489
	1.34366	0.993768	0.995686	1.0096	1.00426	0.974905	0.999258	0.992126	0.984902	1.00684	1.00046	0.98218	0.9777	0.976038	0.98676	0.982993	0.995711	0.994352	1.01666	0.99595	1.0054	1.00448	1.01519	1.02287	1.01291	1.00566	1.00913	1.00246	0.99939	1.00816	1.01263	0.992945	1.01271	1.00771	1.02334	0.994693	1.01247	0.998969	1.01065	0.987609	0.981727	0.97173	0.967324	0.99265	0.988358	0.984654	1.01138	0.984637	0.978201
	1.34355	1.01392	0.995273	1.00441	1.00395	0.993889	1.00386	0.993735	0.982707	0.993953	0.995963	0.986073	0.990977	0.97793	0.972477	0.991462	0.980875	1.00776	1.00477	1.00224	1.00156	1.01012	0.998238	1.01553	1.0044	1.00587	0.997479	0.993077	0.996319	1.0039	1.00873	1.00592	1.00301	1.00871	1.00502	1.00716	1.00116	1.00364	0.998248	0.983945	0.98969	0.977544	0.95556	0.971238	0.987327	0.981614	1.01017	1.00688	0.9901
	1.34343	1.00336	0.995468	1.00127	1.00748	0.992892	0.993505	0.996062	0.982161	0.995356	0.996166	0.980871	0.99451	0.980492	0.973513	0.988755	0.982459	1.00224	0.998364	1.02218	1.00852	1.01271	1.01937	1.01281	1.01302	1.02526	1.00204	1.00373	1.00395	0.99303	1.01166	1.00472	1.01073	1.01735	1.00447	1.006	1.00216	1.00423	1.00345	0.993586	1.00274	0.98282	0.968409	0.9799	0.984436	0.996369	0.996075	0.985383	0.977702
	1.34332	0.993604	0.996131	0.989311	0.996479	1.00405	1.00658	0.99278	0.987145	1.00381	1.00484	0.996477	0.987259	0.9794	0.988714	0.975209	1.00342	0.998688	1.00432	1.0189	1.00999	1.00104	1.01824	1.01624	1.00284	1.0145	1.00982	1.02629	1.01443	0.997169	1.018	1.02749	1.00857	1.01253	1.00886	1.01637	1.00222	0.990841	0.992677	0.998347	1.00427	0.991739	0.969469	0.973787	0.976802	0.992216	0.993668	1.01067	0.980844
	1.34321	0.995356	0.991288	0.998433	0.99011	0.99099	1.00773	0.985646	0.981415	0.997334	1.00769	0.98464	0.989915	0.973761	0.980662	0.990325	0.999095	1.01158	0.991216	1.00365	0.997673	1.01172	1.0015	1.00242	1.00364	1.0088	1.00239	1.00038	1.01292	0.999371	1.0019	1.0079	1.00665	1.00895	1.01095	1.00446	1.00183	1.00751	1.00351	0.98991	1.00578	0.997179	0.979896	0.973535	0.999297	0.997799	1.00065	1.00309	0.981468
	1.34309	1.00691	1.00225	1.00503	0.989608	0.994627	0.997675	0.991942	0.993242	1.0108	1.00872	0.986683	0.988352	0.978695	0.986866	1.00408	0.981768	1.01322	1.00277	0.98976	1.01278	1.02334	1.01061	1.0106	1.00525	1.02022	1.0135	0.996901	1.0119	1.01275	1.00799	1.00405	1.00704	1.00634	1.02084	1.00755	1.01031	1.01204	1.00214	0.991993	1.00929	0.988865	0.976603	0.979576	0.98075	0.997638	1.00255	1.00318	0.982521
	1.34298	0.993294	0.986763	1.00956	0.988241	0.995142	1.00307	0.983583	0.980562	1.00459	1.01312	0.990116	0.981429	0.983451	0.98591	0.99995	1.00062	1.01119	1.00546	1.00816	1.01719	0.998554	1.00746	1.01876	1.01434	1.00122	0.999336	1.00814	1.00958	1.01785	1.00845	1.01734	1.01417	1.00021	0.997581	1.01215	1.0101	1.01882	1.01763	1.01722	1.00048	0.996326	0.982806	0.975363	0.986488	0.968433	0.99477	0.974861	0.997274
	1.34287	0.984374	0.992125	0.991686	0.994177	0.997006	0.99824	0.970609	0.998948	1.00542	0.991671	0.977167	0.985497	0.967001	0.966331	0.994484	1.0039	0.998388	0.998375	0.998599	1.00884	1.01741	1.01199	1.00126	0.994642	1.00992	1.01762	1.00035	0.998189	1.01125	1.00316	1.00377	0.997518	1.01271	1.01355	1.01376	1.01779	0.999647	1.01725	0.997463	0.993162	0.998457	0.983953	0.97247	0.977537	0.978763	1.00408	0.99919	0.992827
	1.34276	0.98758	0.985308	0.988763	1.00183	0.997505	0.980524	0.986949	0.983602	1.01114	1.00569	0.985638	0.986944	0.973661	0.981999	0.994853	1.00889	1.01263	1.00021	1.00625	0.997879	1.01186	1.00028	1.00958	1.00855	0.997904	1.00263	1.01019	1.01504	0.995049	1.00662	1.01115	1.00714	1.02276	1.01513	1.01451	0.98692	0.99385	1.00544	1.00464	1.00511	1.00244	0.997319	0.973098	0.979925	0.987541	0.987488	1.00339	0.982675
	1.34264	0.992305	0.990828	0.99331	0.983363	0.99452	0.997806	0.98088	0.994511	0.999375	0.997773	0.984672	0.969956	0.98545	0.987244	1.00273	0.999312	1.01141	1.00259	1.00724	1.0086	1.01387	1.00644	1.01575	1.02278	0.99636	1.00104	1.02179	1.00706	1.01235	0.992231	0.989036	1.0146	0.99213	1.0061	1.01254	1.01482	0.992929	1.00957	0.997628	1.00078	0.992201	0.984694	0.97431	0.981529	0.982751	0.993372	0.994269	0.985686
	1.34253	0.985105	0.985375	0.979224	0.987254	0.999092	0.982162	0.977477	0.99335	0.995172	0.993723	0.98297	0.976827	0.976343	0.989289	0.99094	0.992901	1.00101	1.01632	0.999486	1.02324	1.0164	1.01429	1.00587	1.00448	1.01883	0.997335	1.02914	1.0016	1.01241	1.00013	0.996743	1.02647	0.995204	1.01853	1.00843	1.01001	1.00365	1.01151	0.999701	1.00289	0.996971	0.990803	0.981779	0.983213	0.977378	0.996685	0.985468	1.00926
	1.34242	0.983015	0.993874	0.989228	0.984603	1.00012	0.99666	0.988143	0.995554	0.979454	1.00178	0.974596	0.973326	0.98158	0.983132	0.991143	0.996004	1.01701	1.01059	1.00644	1.00722	1.02506	0.998507	0.998577	1.01388	1.00564	1.0033	0.996987	1.01045	1.00227	1.0038	1.0075	1.00208	1.00069	1.01173	1.00754	1.01324	0.993945	0.998351	1.00445	0.997819	0.99483	0.979202	0.97881	0.983045	0.979879	0.992057	0.997179	0.990748
	1.34231	0.984092	0.982105	1.00159	0.995245	1.00057	0.983355	0.984374	0.996761	1.01029	0.989957	0.978011	0.978502	0.974294	0.997543	0.990384	0.997151	1.01532	1.01064	1.01299	1.00222	1.0135	1.01453	1.00659	0.993083	1.00371	1.00777	1.00513	0.994702	1.006	0.997596	1.00715	1.00044	1.0055	1.00957	1.00597	1.01525	1.00999	1.00761	1.00638	1.00208	0.99061	1.0011	0.979947	0.986196	0.981851	0.99097	0.992525	0.996369
	1.34219	0.989582	0.981105	0.995628	0.995685	1.00002	0.995933	0.991625	0.997762	0.997194	0.992689	0.9784	0.958371	0.97763	0.989734	1.00137	1.00005	0.999886	1.01507	1.0213	1.01508	1.03304	1.01809	1.00794	1.01633	1.00757	1.00409	1.00568	1.00588	0.999986	0.989803	0.991714	1.00047	1.0065	1.00339	1.00933	1.01269	1.0122	1.01004	0.996782	1.01319	0.993808	0.984005	0.985618	0.972683	0.987917	0.994248	0.988254	1.00524
	1.34208	0.991434	0.990746	0.991457	0.980622	0.997829	0.976566	0.99357	1.00119	0.995101	0.995797	0.972219	0.977408	0.980576	0.99677	1.00308	1.0013	1.00677	1.00876	1.01886	1.00911	1.00542	0.998132	1.01498	1.02079	1.00889	1.01015	1.00699	0.99377	0.995774	1.00152	1.00027	0.996783	1.00113	1.0114	1.01904	1.01086	1.01463	1.00889	1.00043	1.0026	1.00178	1.00164	0.982635	0.990253	0.965491	0.991559	0.991279	0.991319
	1.34197	0.990998	0.995829	0.993788	0.991047	0.998875	0.977878	0.988549	0.99061	1.00867	1.00255	0.969297	0.981745	0.985196	0.989314	0.995016	1.00694	1.00984	1.0179	1.0137	1.00577	1.01517	1.01268	0.996861	1.00838	1.0109	1.00478	1.00778	1.0025	0.999248	1.00772	1.00165	1.00823	0.99642	1.01106	1.00887	1.01188	0.989929	1.01046	1.00432	1.00915	0.997064	0.988145	0.989282	0.97547	0.985341	0.994021	0.985674	1.00033
	1.34186	0.991226	0.994603	0.99259	0.990488	0.99374	0.990349	1.00206	0.996994	0.996751	0.993441	0.982782	0.983153	0.973355	0.989219	0.996834	1.01401	1.01128	1.00929	1.00929	1.00089	1.00537	1.01093	0.995461	0.99642	1.00393	1.0032	0.999056	0.991852	1.00845	0.996501	0.992383	0.98879	1.00527	1.00629	1.00686	1.00231	1.01205	1.00296	1.0005	1.00149	0.997983	0.992415	0.994956	0.972955	0.964406	0.990492	0.996115	1.00214
	1.34174	0.995925	0.9858	1.00731	0.991332	1.00102	0.981813	0.99314	0.984186	0.998093	0.995421	0.962508	0.979044	0.982456	1.00038	1.01569	0.996934	1.00323	1.02117	1.0112	1.00321	1.00731	0.991258	1.02109	1.0029	1.00955	1.00578	1.00178	0.999216	0.998522	0.992525	1.00078	0.995273	0.998245	1.00302	1.01376	1.00686	1.01673	1.00932	1.00715	1.02436	1.0054	1.00299	0.983058	0.969981	0.979122	0.991978	0.992501	0.998613
	1.34163	0.993688	0.98355	0.999082	0.999324	0.999487	0.981882	0.986303	0.99646	0.994247	0.988154	0.969434	0.972901	0.978647	0.994842	1.00408	1.00571	1.00504	1.01683	1.01582	1.01499	1.02043	1.01013	1.01868	0.998663	1.0023	1.00155	1.00214	1.0059	0.991812	0.998291	0.996459	1.00159	0.991648	1.02369	1.01383	1.01067	1.00287	1.00367	1.00107	0.998952	1.00786	0.999863	0.983753	0.976422	0.974577	0.980061	0.987273	0.996394
	1.34152	1.00536	0.987519	1.00424	1.0022	0.997441	0.998528	0.992531	0.993463	0.994971	0.983093	0.969977	0.981163	0.986558	0.995812	1.0109	1.02211	1.01559	1.00934	1.01359	0.996216	1.00635	0.995574	1.0042	0.998777	0.998961	1.01042	0.992131	0.980513	0.997904	0.991709	1.00102	0.989595	0.993942	1.00593	1.00472	1.01663	0.995208	1.00295	1.01536	1.00482	0.998927	1.00233	0.989389	0.973239	0.982305	0.986126	0.980314	0.993577
	1.34141	0.997287	1.00055	1.0212	0.989958	0.98459	0.982514	1.00015	0.995161	0.993999	0.992614	0.974326	0.970563	0.979424	0.991372	1.01874	1.00396	1.01834	1.01054	1.02674	0.998688	1.004	1.00937	1.00837	1.00871	1.00768	0.983029	0.991542	1.00691	0.988867	0.999216	1.0112	1.00341	0.99703	1.0048	1.0204	0.996305	0.992849	1.01458	0.999307	1.01033	0.997039	1.008	0.985699	0.975483	0.974396	0.983906	0.980283	0.998925
	1.3413	0.989123	0.994567	1.00138	0.990953	0.989997	0.98052	0.996018	0.995824	0.996411	0.989221	0.958855	0.964386	0.990557	1.00064	1.00561	1.01265	1.01251	1.01994	1.0053	1.01903	0.996667	0.997716	1.00341	1.00591	1.00442	1.00129	1.01082	0.992191	0.998549	0.987221	0.998702	0.985682	1.00214	1.00647	1.00834	1.01133	1.00839	1.01615	1.001	1.00417	1.00754	1.00928	0.98122	0.977804	0.972771	0.99462	0.982672	1.00433
	1.34118	0.993273	1.00214	1.00509	1.00716	0.987251	0.991396	1.00907	0.98659	1.00911	0.981314	0.962192	0.973807	0.986052	0.993435	1.00416	0.997081	1.01144	1.01169	1.02484	0.997246	1.01325	0.997832	0.997524	0.997419	1.00164	1.00391	0.980679	1.00272	0.994113	0.999533	0.990562	1.00082	0.997032	1.0023	1.00577	1.01735	1.01262	0.999166	1.00843	1.01088	1.00327	1.00009	0.994816	0.988487	0.980655	0.995398	0.970551	1.00421
	1.34107	1.00263	0.981497	1.00444	1.00848	0.99452	1.00517	0.997293	0.99478	1.0002	0.979124	0.981734	0.982872	0.996807	1.00085	1.00988	1.01458	1.01227	1.02475	1.01303	0.999963	1.01934	0.995425	0.999468	1.00022	0.992106	0.988065	1.0006	0.983116	0.985243	0.995095	0.987037	0.989576	1.00478	1.00535	1.00287	1.00658	0.985654	1.00386	1.01117	1.00822	1.00642	1.0058	0.988991	1.00299	0.965126	0.987429	0.986492	1.00577
	1.34096	0.980755	1.00094	1.01391	0.994514	0.981502	0.989077	1.00904	0.996718	0.996167	0.979253	0.960119	0.985463	1.00607	1.01193	0.99402	1.00911	1.0163	1.00931	1.00048	1.01769	1.00925	1.00362	1.00027	0.986751	0.995422	0.990725	0.99339	0.986938	0.988415	0.99012	0.990627	1.00418	0.999868	1.00035	0.999928	1.0196	0.99702	0.998079	1.0117	1.00035	1.00371	1.00968	1.0023	0.995164	0.970833	0.986042	0.976725	0.993197
	1.34085	0.998265	1.00432	1.00425	0.999646	0.989999	0.992934	1.00047	0.99059	0.990411	0.989936	0.978269	0.97939	1.00547	1.00588	1.0223	0.99604	1.00542	1.01822	1.00154	1.0075	0.99927	0.991483	1.00747	0.988301	1.0047	0.982851	0.986893	0.995	0.991827	0.98884	0.994436	0.973794	1.00387	0.99633	1.01602	0.998223	0.998496	1.00569	1.01418	1.02512	1.00416	1.01492	0.987309	0.993201	0.971682	0.977882	0.976695	0.995696
	1.34073	0.988279	0.997482	0.999348	1.00292	0.981181	0.986371	1.0037	0.99781	0.991456	0.989094	0.972324	0.978263	0.997302	0.998958	1.00878	1.00663	1.00833	1.00618	1.02112	1.00879	0.994063	0.99592	1.00318	0.983062	0.988888	0.996646	0.987039	0.984858	0.98778	0.983918	0.997465	0.999219	1.00367	1.005	0.996555	1.02107	1.00469	1.01654	1.00459	1.00973	1.01068	1.00392	1.00707	0.977107	0.961543	0.987624	0.970701	0.993823
	1.34062	1.00456	1.00652	0.999536	0.997626	0.987181	1.00381	1.00275	0.992358	0.985841	0.982952	0.970561	0.991835	0.991358	1.0144	1.0175	1.00756	1.00377	1.00744	1.01922	1.00078	0.996483	0.990152	1.00941	0.983697	0.999658	0.994158	0.983861	0.981857	0.968619	0.994767	0.982798	0.981927	0.998334	0.995226	1.00294	1.00307	1.00614	1.00532	1.00021	1.00369	1.00426	1.01243	1.00096	0.997302	0.971539	0.977352	0.978446	1.00164
	1.34051	1.00079	0.997408	1.00591	0.99847	0.989968	1.00458	1.01537	0.984295	0.991795	0.984461	0.964827	0.999711	0.998912	1.00677	1.01075	1.01839	1.01041	1.00996	1.01131	1.00032	1.00797	1.00272	1.00405	0.992652	1.00263	0.985113	0.9819	0.991612	0.984231	0.986098	0.999449	0.986656	0.991814	0.994215	0.999477	1.0071	0.999106	1.01593	1.01974	1.00499	1.00975	1.00745	1.00186	0.984526	0.966518	0.976051	0.979711	0.994734
	1.3404	0.994725	1.00079	0.9862	0.996194	0.989374	0.990991	1.00611	0.991034	0.979043	0.98011	0.97164	0.989332	0.996516	1.01452	1.01079	1.01059	1.00172	0.998325	1.01458	1.00777	1.00473	1.00407	0.994113	0.980186	0.997928	0.982211	0.985295	0.9939	0.9769	0.969299	0.986407	0.985887	0.993693	0.998391	1.00635	1.00479	1.00212	1.00282	0.992587	1.01619	1.0153	1.0148	1.01093	1.00107	0.965637	0.976115	0.972429	0.988959
	1.34029	1.00245	0.99577	1.00974	0.990678	0.97902	0.998631	0.994309	0.999173	0.986073	0.977897	0.960533	0.995756	0.988443	1.0113	1.01121	1.00171	1.00903	1.02357	1.00222	0.999597	0.997873	1.0097	1.0037	0.988671	0.99377	0.981601	0.989687	0.982432	0.98758	0.986182	0.983906	0.982426	0.995312	1.00589	1.00004	1.00248	1.0001	0.99992	1.01464	1.0159	0.995921	0.999899	1.00272	0.991209	0.977789	0.976793	0.968532	0.986252
	1.34017	0.98844	1.00037	1.00493	0.995335	0.992818	1.00054	0.995024	0.996985	0.999507	0.985934	0.982845	0.986102	0.992554	1.00942	1.01367	1.01534	1.01421	1.00861	1.00946	1.00336	0.993696	0.986029	0.989612	0.992316	0.977602	0.980069	0.976119	0.975852	0.979455	0.978828	0.984451	0.990515	0.981217	1.00302	0.996152	1.00454	0.997675	0.996207	1.00276	1.01338	0.997162	1.02733	1.00209	0.995607	0.957381	0.972338	0.969116	0.994594
	1.34006	0.999185	0.998027	0.996191	0.998083	0.981223	0.997513	1.01095	0.993232	0.983658	0.983289	0.976779	0.992279	1.00459	1.01309	1.00444	1.01336	1.01436	1.01389	1.00665	0.999652	1.00498	1.00217	1.00111	0.998219	0.982727	0.974146	0.972161	0.990273	0.977333	0.989547	0.984475	0.982267	0.982695	0.993561	1.00696	1.01053	0.993159	1.00538	1.0106	1.01014	1.00451	1.00982	0.996764	0.986148	0.987609	0.975596	0.979405	0.980391
	1.33995	0.985713	0.986496	1.00313	0.998384	0.98008	0.990706	1.0004	0.986349	0.991965	0.98895	0.959598	0.998693	1.00308	1.0083	1.00569	1.01739	1.01138	1.01267	0.998731	0.996904	0.990346	0.979645	0.983233	0.984321	0.98215	0.973613	0.969818	0.968925	0.968101	0.961871	0.974094	0.981723	0.996398	0.990515	0.993478	0.987056	0.993459	0.9916	1.00667	1.01656	0.996913	1.01546	0.994487	1.00611	0.96643	0.979051	0.968177	0.987636
	1.33984	0.999528	0.985315	1.00437	0.994773	0.984499	1.00323	0.993133	0.990227	0.984907	0.967323	0.991141	1.01362	1.00283	1.00154	1.01333	1.00554	1.0096	1.00291	1.01123	0.992141	1.00433	0.974951	0.994631	0.982737	0.980859	0.958561	0.989002	0.982044	0.977312	0.970583	0.976204	0.979507	0.99323	0.986365	1.00321	0.997174	1.00145	1.01046	1.01117	1.01786	1.00949	1.01605	1.00326	1.01032	0.980986	0.982657	0.978173	0.980928
	1.33973	0.988803	0.979615	0.996963	0.985893	0.990172	1.00061	1.00039	0.991076	0.981713	0.988812	0.9698	1.00216	1.01233	1.00189	1.02123	1.00154	1.01206	1.00178	1.01413	0.992091	1.00002	0.983244	0.984057	0.975909	0.973304	0.977426	0.971057	0.959363	0.969054	0.97195	0.980595	0.982075	0.991888	0.993701	0.987273	1.00039	0.994557	1.0083	1.01572	1.00162	1.00184	1.01813	1.00508	0.999968	0.981512	0.976328	0.969212	0.981
	1.33961	0.991952	0.993775	0.996429	0.984728	0.999572	1.01165	1.00795	0.993648	0.977218	0.984046	0.972929	0.998941	1.00202	1.01495	1.02826	1.02696	1.01672	1.01152	1.00838	0.995868	0.985705	0.985811	0.994376	0.969407	0.957837	0.958991	0.970711	0.976417	0.954396	0.975775	0.959819	0.981775	0.970893	0.99145	0.994986	0.98369	1.00338	0.999614	0.996382	1.00765	1.00047	1.02168	1.01044	1.00819	0.980759	0.974968	0.973062	0.975644
	1.3395	0.987158	0.990213	1.00429	0.994728	0.997751	1.00481	1.00282	1.00016	0.992061	0.977424	0.98111	0.997705	1.00355	1.01042	1.01894	1.00585	1.01681	1.0102	0.999002	0.974265	0.998662	0.966947	0.985725	0.975712	0.98845	0.965176	0.96427	0.975832	0.9708	0.964257	0.985778	0.962831	0.958032	0.985343	0.995082	1.00001	0.990435	1.00544	0.999653	1.00932	1.00594	1.01542	1.0007	1.00726	0.996731	0.972392	0.99337	1.00609
	1.33939	0.987947	0.983411	0.989599	0.997362	1.00505	0.999652	0.999277	0.988084	0.989764	0.983915	0.972532	0.993842	1.00821	1.00951	1.00503	1.02224	1.01228	1.01709	1.00782	0.994264	0.991503	0.983115	0.973083	0.972563	0.976951	0.968788	0.953936	0.971628	0.973917	0.967343	0.969912	0.968742	0.964711	0.996607	0.977459	1.00625	0.990431	1.00859	1.00005	1.01126	1.01552	1.01741	0.990422	1.00868	0.984812	0.981881	0.964314	0.981794
	1.33928	0.969862	0.99105	0.984933	0.995134	0.980096	1.00361	0.989848	0.976618	0.98854	0.981847	0.981168	1.01467	1.00549	1.00736	1.00972	1.00349	1.01417	1.0054	1.0069	0.981485	0.99731	0.973648	0.988773	0.953406	0.969241	0.968125	0.962312	0.96843	0.968297	0.960509	0.965407	0.970824	0.987471	0.996589	0.982667	1.00276	0.998479	1.00421	0.997873	1.01149	1.01314	1.0023	1.01055	1.01244	0.986966	0.97367	0.968619	0.976112
	1.33917	0.975761	0.991899	0.985467	0.980625	0.976947	0.99885	0.991268	0.983654	0.982381	0.98305	0.979429	1.00417	1.01368	1.00675	0.995207	1.00892	1.01589	1.00572	1.00771	0.98622	0.980659	0.973575	0.958681	0.963569	0.967475	0.958844	0.948883	0.961481	0.962795	0.969817	0.956293	0.965052	0.971636	0.983456	0.994421	0.992491	0.997765	0.992149	1.00618	1.00955	1.01813	1.02149	1.00383	1.01272	0.985706	0.975953	0.961682	0.993148
	1.33906	0.988588	0.995885	0.991855	0.981864	0.992029	1.00951	1.00269	0.989118	0.97274	0.994003	1.00316	0.998548	1.00267	0.992628	1.01196	1.00955	1.00195	1.00136	1.00068	0.987719	0.988749	0.961837	0.974603	0.958531	0.964845	0.957581	0.956135	0.968837	0.950394	0.969323	0.963528	0.966509	0.974741	0.97273	0.975847	0.980245	1.01104	1.01882	0.995638	1.00235	1.0136	1.01955	1.00604	1.00704	0.985704	0.992225	0.96578	0.982414
	1.33894	0.984096	0.977349	0.979517	0.995348	1.00288	0.998491	0.990172	0.973596	0.96966	0.986509	0.988176	1.00577	1.00586	1.02265	1.01628	1.00242	1.01089	0.997601	0.996233	0.984282	0.991806	0.95434	0.959891	0.961784	0.956388	0.959583	0.956651	0.96234	0.953503	0.955631	0.966269	0.951899	0.964992	0.987193	0.969387	0.999201	0.982187	1.01771	1.00438	1.00742	1.0374	1.01385	1.01965	1.00416	1.00165	0.989309	0.967808	0.977514
	1.33883	0.979148	0.983788	0.988453	0.989037	0.996452	0.997282	0.989496	0.976492	0.978846	0.987053	0.98472	1.00699	1.01485	1.01678	1.00982	1.01249	1.00098	0.989606	0.99945	0.978892	0.976249	0.98048	0.97813	0.958503	0.962684	0.943731	0.948762	0.951876	0.953768	0.961653	0.95976	0.971005	0.968419	0.978888	0.972725	0.977524	0.989578	1.00963	1.00927	0.997517	1.00229	1.00989	1.00852	1.00191	0.997893	0.988834	0.970757	0.975808
	1.33872	0.98859	0.97811	0.982834	0.981251	0.986081	0.987965	1.00372	0.991359	0.971172	0.986602	0.995064	1.00399	1.00374	1.00099	1.0115	0.9965	1.01499	1.01324	0.991027	0.982434	0.995047	0.972521	0.978441	0.963055	0.95317	0.956735	0.950239	0.955277	0.942097	0.945033	0.969789	0.959162	0.979639	0.969339	0.967955	0.982926	0.979785	0.997183	1.01092	1.00699	1.01036	1.0048	1.01025	1.01787	0.98973	0.981989	0.9674	0.975473
	1.33861	0.98866	1.00453	0.993405	0.976162	1.0123	0.999492	0.997743	0.972706	0.986967	0.990861	0.994831	1.01003	1.01659	0.998664	1.01316	1.01908	0.999079	0.992407	1.00293	0.987366	0.986373	0.961716	0.965363	0.947627	0.948729	0.934778	0.947564	0.950744	0.953266	0.956227	0.95734	0.954162	0.962052	0.970741	0.97087	0.993239	0.991649	1.00856	1.0045	1.00976	1.01168	1.02296	1.00903	1.00926	0.984714	0.980015	0.951527	0.990187
	1.3385	0.998867	0.985039	0.984129	0.983579	0.998755	1.00849	0.996487	0.976979	0.974515	0.986888	1.00086	1.00743	1.00556	1.00325	1.00582	1.00314	0.992471	1.0095	0.999471	0.990282	0.98609	0.964815	0.975313	0.940206	0.949245	0.931867	0.92987	0.934717	0.944233	0.94566	0.952861	0.956757	0.954156	0.97404	0.975408	0.98489	0.986918	0.99319	0.989963	1.00396	1.00297	1.01144	1.01252	1.0262	1.00289	0.992942	0.969894	0.970971
	1.33838	0.998912	0.99497	0.986798	0.987925	1.00218	0.999333	0.997469	0.977875	0.972672	1.00313	0.995649	0.992554	1.01666	0.994464	1.00443	1.01101	1.00176	0.986006	0.988574	0.97752	0.985802	0.957514	0.977009	0.938256	0.944346	0.931482	0.928831	0.939797	0.948016	0.932618	0.952487	0.9375	0.95173	0.959259	0.967529	0.977925	0.972618	0.989957	0.997144	0.996163	0.99735	1.0118	0.997128	1.00556	1.00906	0.989136	0.970472	0.987319
	1.33827	0.978563	0.988366	1.01178	0.979481	0.996235	0.986822	1.00014	0.969305	0.971717	0.994414	0.981543	1.00312	1.01698	1.00669	1.01069	1.00217	1.00507	1.00533	0.983372	0.978535	0.959988	0.967601	0.947004	0.946787	0.92865	0.918882	0.931192	0.926843	0.926534	0.937965	0.931127	0.948514	0.974633	0.966913	0.96956	0.977221	0.980578	0.968303	0.995196	1.00478	1.0016	1.01207	1.00948	1.01809	0.998121	0.987457	0.971665	0.965333
	1.33816	0.978974	0.978829	0.994558	1.00267	0.998152	0.997571	0.995685	0.973186	0.971153	1.0078	0.990921	1.01179	1.01252	1.01758	1.02387	0.992497	1.00118	0.984731	0.982883	0.971767	0.9659	0.955308	0.941569	0.919822	0.935231	0.907263	0.911965	0.903907	0.9076	0.913708	0.930027	0.939709	0.955597	0.965559	0.960353	0.98754	0.966435	0.979053	0.988695	0.996639	0.995489	1.01483	1.01964	1.00624	1.00075	0.995465	0.972479	0.981041
	1.33805	0.992737	0.982615	1.00436	0.993257	0.996457	0.995747	0.991848	0.976909	0.999115	1.00506	0.998072	1.01298	1.00042	1.00222	1.00295	0.991909	1.01006	0.985033	0.976205	0.976526	0.965358	0.949258	0.943713	0.937928	0.916528	0.906023	0.92348	0.908211	0.913579	0.914699	0.918581	0.943401	0.953882	0.968097	0.954572	0.976006	0.971549	1.00106	0.99834	1.00327	1.00798	0.998518	1.01452	1.01594	1.00303	0.990655	0.966648	0.981264
	1.33794	0.988675	0.98804	0.995653	0.997292	1.00135	0.98427	0.983534	0.967181	0.985158	1.00043	0.996166	1.00644	1.01297	1.00426	1.0195	0.99687	0.985483	0.984695	0.976286	0.977431	0.967587	0.946083	0.9504	0.913393	0.913862	0.919739	0.910933	0.904443	0.90897	0.912873	0.927375	0.913286	0.945719	0.959821	0.964874	0.980719	0.965472	1.00184	0.977585	1.00776	1.01462	1.00818	1.01135	1.00945	0.996685	0.986962	0.977502	0.977641
	1.33783	0.993032	0.9966	0.999883	0.987014	1.00385	0.995649	0.999899	0.974599	0.986567	0.998473	1.00704	0.994828	1.01326	1.01243	1.00747	1.00281	1.00073	0.996073	0.981912	0.970858	0.955098	0.934193	0.937893	0.919548	0.902467	0.912781	0.909449	0.902308	0.921379	0.917784	0.895529	0.923924	0.946935	0.947504	0.958992	0.975453	0.964086	0.988503	0.997864	1.00299	0.991379	1.02449	1.02389	1.00856	1.00153	0.991388	0.967331	0.973426
	1.33771	1.00028	0.992324	1.00714	0.999676	0.99032	0.999606	1.00213	0.972502	0.977105	1.00103	0.986254	0.998698	1.00687	1.02077	1.00544	0.99981	0.99268	0.989541	0.972651	0.964262	0.960131	0.938812	0.942322	0.913028	0.915959	0.928656	0.918762	0.920299	0.919401	0.908777	0.902277	0.90836	0.937437	0.946454	0.947394	0.964782	0.973151	0.980579	0.994649	0.993526	1.00871	1.03014	1.00406	1.0194	0.989502	0.994468	0.977177	0.97433
	1.3376	0.99819	0.996588	0.997972	1.00598	0.998293	0.99691	0.983988	0.962412	0.987149	1.00551	1.0001	1.0065	1.01991	1.0109	1.00371	0.999842	0.991215	0.98799	0.985661	0.976427	0.956951	0.941755	0.931999	0.913981	0.911486	0.926169	0.914894	0.927851	0.927252	0.92515	0.908521	0.902338	0.924389	0.949956	0.94371	0.965562	0.960908	0.975176	1.00081	1.00137	0.991706	0.998485	1.01254	1.00991	1.00828	1.00266	0.973333	0.974013
	1.33749	1.00725	1.01813	1.0104	0.99166	1.00446	0.982612	0.985966	0.960903	0.990181	1.00011	1.00498	1.01334	1.00687	0.996265	1.00394	1.00791	0.995923	0.996875	0.96691	0.965492	0.95728	0.924195	0.9232	0.90438	0.926934	0.93368	0.921116	0.939445	0.937892	0.936607	0.921394	0.91916	0.930331	0.941371	0.939825	0.954952	0.961504	0.977759	0.984858	1.00626	0.985628	1.00755	0.992972	1.01303	1.00715	1.01145	0.99009	0.979371
	1.33738	0.989007	1.00489	1.01693	1.00373	0.996754	0.989654	0.981398	0.970613	0.984991	1.0106	1.00566	0.999517	1.01103	1.00071	1.01019	0.997647	0.977594	0.974639	0.972392	0.950461	0.94574	0.907792	0.918923	0.907531	0.930071	0.95373	0.933778	0.954715	0.939138	0.940249	0.938432	0.914301	0.911856	0.9242	0.941012	0.954852	0.963869	0.977123	0.98738	1.00589	0.995688	0.998588	1.00239	1.02194	1.00248	1.00732	0.987527	0.971754
	1.33727	0.999553	1.01114	1.00141	0.996039	1.00013	0.984381	0.974394	0.960478	0.993447	1.00353	1.00436	1.00708	1.0124	1.01396	1.01244	0.989455	0.974501	0.962994	0.973839	0.951655	0.935591	0.918048	0.914705	0.92038	0.93097	0.956098	0.955301	0.964152	0.939314	0.964392	0.930203	0.922138	0.911267	0.93467	0.94185	0.9564	0.957206	0.971931	0.976589	0.990638	1.01176	1.00118	1.00498	1.00809	0.996643	1.00637	0.987353	0.981454
	1.33716	1.00361	0.986369	0.999207	1.00179	0.996045	0.979912	0.976115	0.966292	1.00687	1.02268	1.00601	1.00389	1.00388	1.01809	0.995178	0.999472	0.990409	0.969418	0.955047	0.95477	0.92695	0.917393	0.913591	0.935475	0.93487	0.970866	0.96102	0.984749	0.964827	0.960002	0.948184	0.940879	0.915807	0.927656	0.910291	0.959093	0.943611	0.969379	0.98752	0.981547	1.00207	1.0035	0.992551	1.00763	1.00259	1.00922	1.00639	0.97731
	1.33705	0.997767	0.999873	1.01212	1.00303	0.991337	0.982854	0.966698	0.981656	0.999572	1.01117	0.99833	1.01325	1.00904	1.00745	0.996989	0.995495	0.97988	0.965572	0.972383	0.95362	0.934515	0.924572	0.9167	0.928443	0.964483	0.978927	0.967462	0.984382	0.963713	0.967212	0.955165	0.946791	0.915277	0.921359	0.921677	0.942773	0.957394	0.974039	0.989556	0.981695	1.00768	1.01368	0.995627	1.01647	1.00959	0.990502	0.998909	0.967116
	1.33693	0.996644	1.00197	1.01002	1.00531	1.00079	0.979346	0.989739	0.968069	1.00631	1.02033	0.990359	1.01102	1.01657	1.00652	0.996269	0.99586	0.97162	0.980182	0.972024	0.936957	0.907231	0.920393	0.915711	0.947059	0.970139	0.981565	0.972628	0.992726	0.988759	0.985086	0.953783	0.951766	0.929577	0.909503	0.924944	0.933041	0.942709	0.972565	0.974859	0.990955	0.998711	1.01233	1.00789	1.01137	1.00726	1.00449	0.981499	0.966709
	1.33682	0.999934	0.988082	1.0096	0.994699	0.9882	0.976491	0.977632	0.961975	1.00695	1.00362	1.00285	1.02271	1.00551	1.00687	0.99703	0.99673	0.980528	0.964002	0.957027	0.923587	0.907418	0.916065	0.936319	0.96455	0.979452	0.981103	0.981031	0.979075	0.989327	1.00728	0.978922	0.970817	0.930246	0.917346	0.910332	0.94877	0.946837	0.965318	0.968621	0.977272	0.98798	1.02129	1.01682	1.0199	1.00537	1.00762	0.994927	0.969347
	1.33671	1.00222	1.00486	1.01227	0.996165	0.994945	0.973455	0.975277	0.963146	1.02705	1.01329	0.992018	1.00985	0.99475	0.999386	1.0015	0.988334	0.966652	0.970294	0.946025	0.931502	0.91058	0.92004	0.937211	0.962247	0.991087	0.998175	0.974443	0.984064	0.985941	0.986085	0.985836	0.958078	0.935002	0.928588	0.91034	0.93158	0.950094	0.954738	0.968886	0.988261	0.981312	0.999157	1.0109	1.00664	0.998991	1.00475	0.983836	0.973756
	1.3366	0.998422	1.00337	1.00294	1.01086	0.990385	0.979743	0.986027	0.96307	1.01121	1.01405	1.00315	1.00196	1.01164	1.00831	1.00389	0.989817	0.973662	0.966823	0.94316	0.924264	0.909746	0.94502	0.959137	0.977993	0.983025	0.989436	0.997763	0.977878	0.992036	0.984979	0.986302	0.979978	0.954725	0.9185	0.912461	0.925455	0.941179	0.959	0.97256	0.971101	0.985731	1.00172	0.999388	1.01288	1.00526	0.999681	1.00231	0.992345
	1.33649	0.993542	1.00146	1.01567	1.00495	1.00197	0.990191	0.97828	0.974804	1.01648	1.02345	1.00547	1.00356	1.01388	1.00142	0.999204	0.978777	0.972237	0.967041	0.939271	0.914388	0.925489	0.947151	0.974369	0.984761	0.994848	0.979895	1.00595	0.991026	1.00241	0.995194	0.993613	0.988783	0.967829	0.949646	0.922343	0.918415	0.934506	0.962883	0.961758	0.979196	0.990068	1.00133	1.00101	1.02537	1.00305	0.994402	1.00528	0.97652
	1.33638	0.988134	0.999138	1.01165	0.987431	0.993917	0.978683	0.982519	0.98651	1.0082	1.02959	0.999311	1.00883	1.00266	1.0019	0.994487	0.979034	0.970572	0.94685	0.940355	0.91974	0.940189	0.957236	0.978672	0.982826	0.998631	0.990477	1.00422	1.01145	0.994053	0.999932	0.990718	0.993632	0.96476	0.95299	0.930927	0.908993	0.923452	0.957015	0.964797	0.992004	1.001	1.00729	1.00823	1.02201	0.997866	1.01406	0.992882	0.983527
	1.33627	0.998401	0.99143	1.00996	1.00537	0.991671	0.983769	0.979508	1.00786	1.00707	1.0113	1.01441	1.00815	1.00705	0.997342	0.975977	0.955928	0.963115	0.968188	0.948012	0.908244	0.946105	0.951789	0.990907	1.00267	1.01488	1.00287	0.991834	1.00939	1.00203	0.999335	0.998818	0.998161	0.973367	0.965973	0.934954	0.910611	0.920531	0.9463	0.966312	0.97905	0.974493	1.00685	1.01343	1.01341	1.00765	1.00737	1.00449	0.992085
	1.33616	1.00347	0.998633	1.01207	1.00252	0.991263	0.979835	0.959214	0.981335	0.992037	1.01363	1.00777	1.00726	1.01737	1.00295	0.993171	0.974348	0.968339	0.95833	0.929768	0.912453	0.94593	0.968325	0.984622	0.997475	0.997167	0.983735	1.00533	0.995614	0.996271	1.0021	0.987932	1.00366	0.979854	0.979818	0.948759	0.916448	0.912939	0.958383	0.961595	0.971946	0.99206	0.99708	0.989319	1.02508	0.996191	1.00092	0.991946	0.98652
	1.33604	0.997119	1.00082	1.00623	0.994072	0.99693	0.976696	0.967115	0.993337	0.999979	1.01344	1.00499	1.01803	1.01355	1.00398	0.979217	0.984728	0.960422	0.94873	0.915641	0.922796	0.957386	0.994042	0.999817	1.00567	0.996588	0.999385	1.00645	1.00965	0.997707	0.993213	1.00779	0.997533	0.980872	0.973578	0.963979	0.909357	0.916471	0.943494	0.970332	0.963656	0.982771	1.01411	0.999404	1.01823	1.01007	1.00422	1.00037	0.988578
	1.33593	0.990344	0.992012	0.996678	1.00444	0.998644	0.98886	0.979311	0.993532	0.993226	1.01323	0.996816	1.00775	1.01972	0.973998	0.98086	0.983527	0.963744	0.936208	0.922831	0.92568	0.963714	0.977667	0.996646	0.993728	1.00301	1.01065	1.00235	1.00867	1.00609	1.00349	1.00114	0.999203	1.01017	0.989441	0.978867	0.921946	0.907312	0.940326	0.953622	0.966778	0.991072	0.99461	0.996304	1.02557	0.994224	1.00953	1.00844	1.00329
	1.33582	1.00783	0.997511	1.02971	1.0019	0.984247	0.97262	0.988124	0.995401	1.00816	1.02081	1.0054	0.995755	1.00109	0.997438	1.00508	0.986468	0.965551	0.942117	0.910067	0.950914	0.974215	0.981998	1.00305	0.993415	1.01815	1.01443	0.994559	0.987837	1.01521	1.01044	1.01619	1.00248	1.00207	0.990454	0.972055	0.935549	0.899792	0.934009	0.957101	0.974013	0.992039	0.993841	0.995056	1.02524	1.00884	0.995712	1.01137	1.00571
	1.33571	0.985668	0.994889	1.00849	0.989533	0.978425	0.970018	0.980266	0.980678	1.00889	1.01236	1.01004	1.0021	1.0062	1.0024	0.97602	0.960659	0.953186	0.940815	0.912097	0.963863	0.98104	0.987979	0.994986	1.0056	1.02018	1.0117	1.01695	1.00548	1.01409	1.00538	1.00772	0.996312	1.00564	0.998695	0.991521	0.967908	0.921137	0.941625	0.959779	0.974167	0.967186	0.99497	0.996458	1.00229	0.984282	1.01395	1.00033	0.994657
	1.3356	1.00577	1.00735	1.00877	1.00585	0.991141	0.99149	0.972864	0.987439	0.99631	1.01859	0.998113	0.991198	0.995464	0.995803	0.991787	0.967539	0.952728	0.933008	0.921335	0.952063	0.989752	0.994843	0.997584	0.993771	0.991219	1.01654	0.999521	1.00941	1.01133	1.00331	1.00357	1.00477	0.99384	1.00329	1.0005	0.961505	0.918298	0.915887	0.968018	0.970788	0.984362	0.98776	0.977344	1.00615	1.01098	1.00626	1.00187	0.993814
	1.33549	0.991591	1.00138	1.00673	0.995732	0.979822	0.9648	0.984126	0.988029	1.01437	1.01403	1.0016	1.00889	0.98653	0.995071	0.971403	0.966784	0.950073	0.922363	0.929978	0.972084	1.00289	0.997178	1.00696	1.00014	0.991123	0.997058	1.00455	1.0095	1.01106	1.00359	1.00551	0.995731	1.00151	1.00508	0.994331	0.985297	0.930526	0.916415	0.945743	0.9735	0.96865	1.00713	0.993249	0.997155	1.00243	0.993383	1.00609	0.987006
	1.33538	0.990568	0.999318	1.01806	0.997856	0.985488	0.970775	0.988645	0.991607	1.01309	1.00787	1.00294	1.01412	0.995473	0.994435	0.966083	0.955892	0.927697	0.940677	0.937347	0.976827	1.0011	0.980218	1.00538	1.01057	1.00625	0.998499	1.00696	1.00566	1.00884	1.0106	0.99187	0.9918	0.988445	1.00949	1.00704	0.983312	0.930526	0.909435	0.9482	0.960518	0.962127	1.012	0.984199	1.00472	0.998352	1.00073	0.994384	1.0009
	1.33527	1.00406	0.976928	0.999528	0.997356	0.98878	0.964544	0.966753	0.980889	1.01075	1.00237	1.00901	1.02436	0.991754	1.00163	0.970181	0.965116	0.940572	0.911164	0.954452	0.991246	1.00918	1.01066	1.00585	1.00167	1.00163	1.00751	1.01419	1.02828	0.997797	1.01778	0.99828	0.995782	1.00655	0.978936	0.996252	0.987219	0.95761	0.927454	0.950203	0.96332	0.980703	0.990253	0.990395	1.00009	1.00473	1.01318	0.986026	1.00262
	1.33516	1.00518	1.00262	0.995866	1.00076	0.982813	0.968819	0.996192	1.01005	1.01819	1.02261	1.00006	1.01118	1.00665	0.982493	0.97401	0.957636	0.922825	0.919259	0.951623	0.99339	1.00431	1.03082	1.01621	0.988864	1.02601	1.01349	1.01288	1.00697	1.01176	1.01496	0.995549	0.989279	1.00396	1.0184	1.00271	0.986203	0.954996	0.91576	0.944635	0.962218	0.97404	0.986901	0.986997	1.02216	0.999883	1.01108	0.989484	1.00605
	1.33504	0.988355	0.981521	0.999264	0.996003	0.966957	0.96544	0.996679	0.996273	1.02031	1.0081	0.999532	0.999982	1.00294	0.991647	0.975333	0.961959	0.926884	0.926631	0.975928	0.984909	1.00062	1.0237	1.00567	0.999511	1.00555	1.00396	1.03318	1.01301	1.01529	1.01048	1.01592	1.00211	1.00041	1.00107	1.00874	1.00372	0.960846	0.909615	0.920207	0.951667	0.965733	0.996747	0.995324	1.01979	1.00688	1.01132	1.00931	1.01291
	1.33493	1.00529	1.00147	1.00768	0.981033	0.980659	0.96155	0.983588	0.997019	1.02659	1.01645	0.986509	1.00345	1.00131	0.960408	0.964365	0.951125	0.922677	0.917641	0.98579	0.991816	1.01665	1.011	0.997893	1.02845	1.01322	1.00716	0.999198	1.01162	1.00515	0.991832	0.995536	1.03786	1.00138	1.01709	1.00084	0.983436	0.978397	0.926617	0.923964	0.942603	0.96795	0.985267	0.986097	1.0025	0.998121	1.00811	1.00931	0.99712
	1.33482	1.0048	0.993028	0.999499	0.992505	0.975431	0.981362	1.01028	0.990102	1.02761	1.0285	1.00339	1.01606	0.998051	1.00414	0.97147	0.939291	0.911974	0.938984	0.973838	0.999222	1.01454	0.991612	1.02615	1.02574	1.00832	1.00119	1.00119	1.01431	1.00299	1.00964	1.0212	1.02664	1.01504	1.01572	0.997523	0.990331	0.963435	0.94525	0.926197	0.932895	0.95027	0.99304	0.975556	0.996909	1.00427	1.01384	1.01656	1.01554
	1.33471	0.97742	0.984436	1.0007	0.991134	0.974691	0.957451	0.996087	1.00514	1.01767	0.99727	0.998371	1.00219	0.993716	0.994014	0.973268	0.937399	0.918919	0.962746	0.982414	0.997174	1.00536	0.991453	1.01977	0.983482	1.00912	1.00793	1.00096	1.02105	1.00298	1.0054	1.00722	1.01475	1.01289	0.992795	1.00709	0.99586	0.988772	0.936318	0.905506	0.947933	0.963159	0.993626	0.992304	1.01285	1.00096	1.01071	1.00176	0.995273
	1.3346	0.992882	0.98906	1.00415	1.0018	0.970724	0.974939	1.00599	0.993183	1.00998	1.014	0.993631	1.00918	0.99204	0.984261	0.959219	0.944684	0.910533	0.968447	0.98671	0.998825	1.00288	1.00287	1.01204	1.01031	1.01777	1.01232	1.00643	1.01901	0.999007	1.00064	1.00098	1.01268	1.02036	1.01238	0.991766	1.00204	0.985323	0.968731	0.904984	0.919419	0.972596	0.979211	0.977443	1.00798	1.00642	1.0168	0.988434	0.988196
	1.33449	0.985474	0.997994	0.991203	0.987569	0.981181	0.995244	1.01226	0.999016	1.01346	1.01959	1.0122	0.996649	0.986013	0.96785	0.975096	0.934155	0.912264	0.992105	1.00808	1.00443	1.00473	1.02191	1.01224	1.01253	1.01338	1.01712	1.02194	1.01997	1.00561	1.0047	1.01112	1.01645	1.00058	1.01729	1.00051	0.986977	0.993135	0.970248	0.913931	0.93188	0.947876	0.956912	0.989519	1.00527	0.982483	1.01218	1.00132	1.01297
	1.33438	0.97926	0.979602	0.997728	0.986571	0.986827	0.97343	0.999206	0.998613	1.0264	1.00863	0.993778	0.987485	0.995717	0.971462	0.963599	0.925194	0.924327	0.990687	0.996324	0.986668	0.995843	1.01306	1.02369	1.00935	1.0257	1.0006	1.00743	1.0146	1.02454	1.02522	1.00376	1.01864	1.00052	1.01068	1.01505	0.995344	0.983641	0.975499	0.926326	0.915964	0.947123	0.974655	0.979031	0.997577	0.984825	1.02087	1.00563	0.992858
	1.33427	0.995698	0.997698	1.00785	0.991017	0.988624	0.991198	0.989517	0.984545	1.01001	1.01748	1.01592	0.99976	0.995382	0.966067	0.951482	0.922449	0.938904	0.987774	0.992487	1.01107	0.995051	1.00008	1.02235	1.02194	1.00749	1.00541	1.01268	1.02037	1.02239	1.00289	0.996684	1.00915	1.01452	1.0058	1.00886	1.00573	0.988233	0.979712	0.943035	0.916268	0.949552	0.969705	0.973781	1.00925	0.997694	1.0094	0.996625	1.0042
	1.33416	0.98109	0.985163	0.99773	0.998412	0.970359	0.985976	1.00189	0.99006	1.00898	1.00809	0.99699	0.996775	0.968541	0.967255	0.939559	0.924687	0.97408	0.996887	1.00342	1.0018	1.0262	1.01416	1.01141	1.00274	1.00891	0.999905	1.01879	1.02258	1.00905	1.02854	1.0116	1.0122	1.02537	1.00939	1.02265	1.00989	1.00834	1.00107	0.947899	0.907541	0.945247	0.978795	0.989478	0.9995	0.989665	1.00846	0.998792	1.00198
	1.33405	0.986505	0.985515	1.0074	1.00281	0.969065	0.979148	1.00666	1.00271	1.02682	1.00802	0.996526	0.976277	0.978532	0.978132	0.940861	0.922656	0.947418	1.0111	1.00851	0.997371	1.00728	1.0013	1.02458	1.00818	1.02238	1.0142	1.00386	1.02225	1.01699	1.00568	1.02318	1.0036	1.01327	1.03131	1.01889	1.01765	1.00534	0.993441	0.936608	0.899382	0.938176	0.975978	0.976302	1.01143	1.00116	0.992897	1.00102	1.01531
	1.33394	0.986693	0.982439	0.994194	0.974386	0.985092	0.988955	1.00689	0.983997	1.00966	1.02279	0.991609	0.989743	0.974892	0.950532	0.94036	0.909043	0.972385	0.999448	1.00004	1.02187	1.02175	1.01081	1.02608	1.01494	1.01628	0.996797	1.01447	1.01071	1.01517	1.00311	1.01446	1.00726	1.01846	1.01525	1.01341	1.01624	1.00433	0.985849	0.962695	0.92473	0.936659	0.965492	0.97165	0.995685	0.986654	0.98926	0.998126	1.01646
	1.33382	0.983619	0.993134	0.995639	0.99956	0.957674	0.982248	1.01191	1.00328	1.00443	1.01256	0.994016	0.980873	0.988743	0.97164	0.931505	0.925795	0.97428	1.00077	0.997829	1.01706	1.01496	1.01579	1.03104	1.02067	1.00648	1.00391	0.999816	1.00531	1.01053	0.9944	1.00148	1.01852	1.0067	1.01064	1.00781	1.00498	0.99024	1.00752	0.979176	0.918668	0.945185	0.960829	0.969511	1.00621	0.992242	0.9983	0.99424	1.00811
	1.33371	0.975958	0.985046	0.982724	0.979035	0.977233	0.999467	1.0071	0.999962	1.01159	1.01422	0.994385	0.984945	0.979561	0.978153	0.922493	0.916936	0.978291	1.01932	1.02074	1.0116	1.02764	0.991096	1.01265	1.00529	1.01886	1.02469	1.01084	1.02439	1.01228	1.02331	1.02495	1.00437	1.00716	1.00926	1.01599	1.01246	1.00075	1.00986	0.983941	0.949666	0.926862	0.953137	0.965751	0.992675	0.975436	0.997894	1.00685	1.00497
	1.3336	0.974913	0.982724	0.994753	0.985466	0.966393	0.987139	1.00518	0.992146	0.999993	1.02285	0.997993	0.984043	0.971573	0.94898	0.919663	0.921119	0.989118	1.00345	1.00841	1.01283	1.01771	0.989266	1.01436	1.00935	1.00643	1.0106	1.02701	1.00767	1.01466	1.01841	1.01208	1.01157	1.0204	1.01895	1.01131	1.01415	1.00724	1.00275	0.971253	0.967608	0.900962	0.950842	0.952296	0.976858	0.978986	0.99689	1.01175	1.00343
	1.33349	0.985132	0.982599	0.988894	0.986836	0.973264	1.00218	1.00865	0.996199	1.00886	1.0197	0.996079	0.984456	0.956918	0.955113	0.908964	0.929119	0.99794	1.01688	1.01523	0.995163	1.02423	1.0065	1.00205	1.01815	1.01524	1.00633	1.0231	1.01455	1.01778	1.016	1.02327	1.00548	1.01987	1.00681	1.00787	1.01906	1.00907	1.00367	0.993927	0.974344	0.913119	0.947558	0.950626	1.00167	0.987034	1.0257	1.00128	1.01098
	1.33338	0.973195	0.990927	0.991582	0.983347	0.974024	0.997454	1.01775	0.997514	1.02086	1.01515	0.977954	0.992162	0.965486	0.963023	0.917554	0.942746	0.986805	1.02623	1.01137	1.02213	1.02306	1.01006	1.02376	1.0078	1.0154	1.01808	1.0116	1.02327	1.01359	1.01018	1.01228	1.01801	1.023	1.02544	1.01354	1.0219	0.981199	1.00259	0.99493	0.972415	0.923053	0.943939	0.945121	0.999956	0.987018	0.988963	1.0218	1.00489
	1.33327	0.9887	0.986485	0.990264	0.980238	0.971341	1.00887	1.00476	0.994143	1.01468	1.00857	0.976694	0.967703	0.970129	0.935611	0.912132	0.964834	1.00123	1.01478	1.00362	1.01011	1.02606	1.00723	1.02733	1.00496	1.0074	1.02318	1.00914	1.02452	1.02214	0.995859	1.00868	1.00705	1.01453	1.00587	1.01937	1.02712	1.02164	1.00655	0.996202	0.970542	0.908067	0.95195	0.961216	0.994963	0.974943	1.00113	1.01012	1.006
	1.33316	0.97654	0.976073	0.983391	0.978719	0.964546	0.98982	1.0273	0.995682	1.02177	0.983303	0.971359	0.984255	0.970048	0.947038	0.915412	0.978381	0.981182	1.01372	1.02847	1.02418	1.01609	1.01021	0.996909	1.00386	1.01363	1.01591	1.01595	1.02948	1.01359	1.01059	1.00791	1.01358	1.01874	1.02798	1.00936	1.01854	0.999768	0.997954	0.994814	0.986775	0.922366	0.934437	0.954775	0.989036	0.992818	0.994909	1.00828	1.01532
	1.33305	0.983714	0.98236	0.986476	0.982765	0.980615	1.00424	1.01653	0.992526	1.01159	1.01264	0.978051	0.968513	0.959321	0.935451	0.940212	0.986378	0.995281	1.02435	1.00737	1.00554	1.00625	1.01035	1.01489	1.02762	0.995814	1.0054	1.01119	1.01304	1.01354	1.01858	1.01914	1.02244	1.03009	1.01497	1.00663	1.02694	0.98788	1.00532	1.0037	0.998864	0.931115	0.925336	0.960521	0.986646	0.985823	1.00046	1.0036	0.985922
	1.33294	0.971467	0.973697	0.992202	0.972086	0.969826	1.00054	1.00951	1.00062	1.02676	1.00542	0.986682	0.976349	0.944352	0.933135	0.938743	0.983063	1.01035	1.02155	1.019	1.01271	1.01897	1.02397	1.03205	1.01984	1.02713	1.03884	1.01028	1.01749	1.02305	1.01672	1.02239	1.01482	1.02317	1.01802	1.01573	1.01726	1.02356	1.00519	1.00225	0.983765	0.948546	0.92519	0.943958	0.977462	0.979343	0.994427	1.00658	1.00167
	1.33283	0.978939	0.985166	0.982862	0.96963	0.986964	1.00477	1.01387	0.996601	1.01486	0.996901	0.982136	0.971789	0.953592	0.927136	0.952034	0.987745	1.01107	1.00902	1.02274	1.03117	1.02457	1.01742	1.02607	1.01199	1.02777	1.00104	1.01492	1.02057	1.0155	1.0186	1.0128	1.02982	1.00144	1.01004	1.00809	1.01326	1.00843	1.0106	0.997815	0.998657	0.961623	0.918605	0.95158	0.971422	0.97043	1.01046	0.988979	0.987544
	1.33272	0.968416	0.976278	0.992726	0.978007	0.983973	0.988813	1.00868	1.01697	0.999577	1.01299	0.957694	0.962622	0.950366	0.908729	0.972834	0.997307	1.00611	1.01618	1.01497	1.00982	1.02459	1.00639	1.01178	1.01699	1.0234	1.01692	1.01312	1.02837	1.00713	1.0225	1.01285	1.01403	1.01806	1.02566	1.02736	1.01034	1.00648	1.01123	0.996095	1.00429	0.970574	0.921176	0.950011	0.97555	0.97417	1.00101	1.00497	1.01715
	1.33261	0.967731	0.983211	0.98603	0.986711	0.98872	1.00646	1.00348	1.01431	1.00545	0.987656	0.989701	0.962359	0.95103	0.912606	0.963377	0.997221	1.00222	1.02247	1.02295	0.998725	1.01005	1.0102	1.049	1.00835	1.01137	1.01742	0.996145	1.01567	1.01028	1.01382	1.01477	1.0206	1.01593	1.02842	1.01447	1.02098	1.01022	1.01251	1.00127	1.00744	0.971742	0.922342	0.94563	0.974783	0.961419	0.999728	1.00673	1.0082
	1.3325	0.982851	0.977032	0.987603	0.990027	0.9945	1.01334	1.01451	1.00459	0.995767	1.00672	0.972339	0.984356	0.937511	0.913879	0.969679	0.997247	1.00335	1.02223	1.00882	1.01565	1.01959	1.0084	1.01223	1.01273	1.01045	1.01493	1.01453	1.01564	1.02816	1.02124	1.02347	1.02064	1.00216	1.03769	1.02266	1.02153	1.02142	1.01252	1.01266	0.98795	0.984081	0.938955	0.935348	0.968676	0.95927	0.994918	0.982435	1.00463
	1.33239	0.979263	0.983259	1.00181	0.999532	0.979461	1.0129	1.00404	1.00058	0.996951	0.994267	0.979205	0.958741	0.930691	0.908564	0.994623	1.00537	1.00057	1.00086	1.01757	1.01567	1.02028	1.01621	1.0316	1.00508	1.01757	1.01685	1.00979	1.01768	1.00368	1.02196	1.01282	0.996668	1.03488	1.03885	1.02162	1.00936	1.00323	1.00555	0.988004	1.00244	0.982882	0.920154	0.922101	0.977787	0.973108	0.993205	0.994394	0.993145
	1.33228	0.972346	0.967809	0.972096	0.96258	0.990293	1.00712	1.00635	0.990884	0.996425	0.998255	0.976359	0.958551	0.918492	0.928416	0.98689	0.992048	1.01564	1.00084	1.02853	1.01391	1.02357	1.02028	1.00823	1.01024	1.01493	1.00135	1.01895	1.01562	1.00486	1.00078	1.02025	0.999061	0.990121	1.0221	1.01627	1.02597	0.999017	1.01572	0.991832	1.02673	1.00124	0.936561	0.918411	0.967052	0.959876	0.996126	1.00887	1.0142
	1.33216	0.968643	0.980615	0.978324	0.966419	0.986234	1.01073	1.02375	1.00394	1.01177	1.00561	0.96862	0.952787	0.935548	0.952156	0.988814	1.00171	1.00635	1.04163	1.00836	1.01961	1.02553	1.00928	1.0258	1.00534	1.02864	1.01145	1.0191	1.02787	1.02035	1.02475	1.01225	1.03026	1.0248	1.02157	1.0176	1.01768	1.02053	1.02273	1.00205	1.02146	0.980862	0.9594	0.910193	0.971094	0.958211	0.983814	0.978856	1.00798
	1.33205	0.976827	0.970724	0.979341	0.980629	1.00332	0.994672	1.00634	0.997926	1.00356	0.986266	0.971089	0.969512	0.931424	0.94864	0.995638	1.00362	1.02513	1.03102	1.01712	1.02186	1.021	1.0133	1.01998	1.011	1.00984	1.01064	1.01592	1.02378	1.01434	1.0248	1.00951	1.02697	1.01399	1.02906	1.0186	1.01088	0.998185	1.01263	1.00068	1.01233	1.00736	0.956741	0.89389	0.959336	0.966958	1.00154	0.993674	1.00983
	1.33194	0.95431	0.976098	0.990773	0.983262	0.97991	0.990096	1.01158	0.997611	1.01337	0.989576	0.961066	0.967055	0.904891	0.961655	1.00746	1.01344	1.01174	1.01971	1.03662	1.02785	1.01439	1.01472	1.01802	1.00447	1.01686	1.01252	1.01447	1.02585	1.01641	1.02763	1.01974	1.01593	1.00635	1.0217	0.995474	1.01991	1.01391	1.03105	1.00648	1.02522	0.999143	0.972252	0.919715	0.95803	0.959943	0.973078	0.974878	0.996424
	1.33183	0.983445	0.973199	0.972909	0.96883	0.990266	1.00366	1.01677	1.00212	0.98472	0.987779	0.966918	0.942246	0.911986	0.969687	1.0178	1.01851	1.00948	1.01424	1.02645	1.03345	1.00763	1.02155	1.03166	1.0177	1.02269	1.01558	1.00922	1.02229	1.01436	1.02072	1.02057	1.0208	1.03068	1.01908	1.00645	1.01826	1.01054	1.02582	1.00815	1.01182	0.978681	0.985654	0.909015	0.958248	0.95276	0.98477	1.00496	1.01808
	1.33172	0.97895	0.978059	0.966007	0.985225	1.00416	0.998124	0.997335	0.980042	1.01757	1.00127	0.972785	0.949951	0.909407	0.974209	1.01726	1.00306	1.01998	1.00282	1.0127	1.01101	1.02311	1.02591	1.01666	1.01101	1.02539	1.03581	1.0162	1.01583	1.02279	1.02646	1.03001	1.01219	1.01515	1.00696	1.00853	1.01515	1.02478	1.01678	1.01729	1.01604	1.00056	0.992343	0.905934	0.937045	0.960639	0.972165	0.99178	1.00374
	1.33161	0.977865	0.975351	0.984111	0.972736	1.00486	0.995056	1.01763	1.00265	1.01398	0.969426	0.958416	0.945324	0.924998	0.993192	1.00812	0.997833	1.02825	1.02178	1.00677	1.02054	1.02108	0.988779	1.02218	1.01923	1.0152	0.998576	1.01163	1.02658	1.02075	1.01233	1.03292	1.00878	1.01723	1.02613	0.9993	1.02537	1.00791	1.0209	1.01721	0.998238	1.00248	0.99851	0.916064	0.940312	0.946407	0.974125	1.00556	1.00427
	1.3315	0.985473	0.979168	0.969397	0.962802	0.98464	1.01726	1.00072	1.00017	0.99358	0.982857	0.957728	0.936931	0.941646	0.991317	0.993377	0.999023	1.00727	1.02613	1.01405	1.00568	1.0274	1.02103	1.01109	1.00081	1.01023	1.00817	1.01149	1.01543	1.03951	1.02075	1.01419	1.0261	1.02737	1.0227	1.0179	1.01553	1.00593	1.02033	1.00968	1.00994	0.991235	1.00429	0.905974	0.947411	0.947735	0.972431	0.984068	1.00522
	1.33139	0.973045	0.984051	0.998854	0.973824	0.982348	1.0023	1.02142	1.00185	1.01161	0.986434	0.967131	0.929069	0.924096	0.987351	1.01134	1.00792	1.00418	1.02212	1.03123	1.01325	1.01555	1.01475	1.01107	1.01109	1.03239	1.00555	1.00093	1.04082	1.03357	1.01201	1.02457	1.0149	1.02301	1.02214	1.01876	1.03051	1.02664	1.00936	1.0088	1.01864	0.999941	1.00204	0.947722	0.939102	0.947306	0.97188	1.00143	0.984277
	1.33128	0.993822	0.992867	0.990714	0.986585	0.986419	1.0016	1.02623	0.996481	1.00466	0.976685	0.961013	0.912251	0.947811	0.985089	1.00506	1.00593	1.02345	1.00286	1.03638	1.01197	1.01691	1.01644	1.0353	1.00549	1.01544	1.01199	1.00386	1.01389	1.01807	1.00746	1.02853	1.03369	0.994044	1.03182	1.03109	1.01957	0.998422	1.02442	1.00353	0.995195	1.00809	1.0072	0.954764	0.923741	0.945467	0.991566	0.989407	0.972748
	1.33117	0.994187	0.988121	0.993678	0.987174	0.985025	1.00884	1.01149	0.991302	0.986834	0.959729	0.958897	0.924683	0.957848	1.00007	1.00417	1.00456	1.0207	1.02734	1.03373	1.02153	1.04425	1.01458	1.02771	1.019	1.02675	1.02153	1.00644	1.02094	1.02364	1.01988	1.02039	1.02571	1.01986	1.01707	1.01328	1.00425	1.00758	1.0152	1.04116	1.00687	1.00458	1.00952	0.963198	0.935483	0.952373	0.978843	0.983756	1.0008
	1.33106	0.984287	0.984853	0.991895	1.00118	0.998548	1.00209	1.01291	1.01146	0.994189	0.976443	0.959778	0.890932	0.970304	0.990519	1.00834	1.02681	1.01492	1.01263	1.01914	1.02419	1.03703	1.02155	1.04241	1.01991	1.01775	1.02013	1.00967	1.02148	1.01335	1.00927	1.02791	1.00438	1.02057	1.0145	1.01187	1.01195	1.01831	1.02604	1.02262	1.00531	1.00022	0.9866	0.983041	0.916575	0.9451	0.977551	0.985823	1.00282
	1.33095	0.996454	0.978034	1.01274	1.00298	1.01121	1.00472	0.990466	1.00437	0.986874	0.975156	0.937212	0.910087	0.967807	0.995511	1.00654	1.01465	1.01048	1.00234	1.02248	1.02446	1.02765	1.00163	1.00274	1.02096	1.01604	1.01459	1.01066	1.00619	1.02093	1.00827	1.00863	1.01735	1.00826	1.02032	1.02323	1.01285	1.01886	1.00899	1.02164	1.02512	1.01838	1.00373	0.983968	0.920012	0.951178	0.967952	0.976805	0.986858
	1.33084	0.994138	0.999766	0.990297	1.00499	1.01839	1.00096	1.01466	0.982507	0.970055	0.975284	0.968462	0.912299	0.981913	1.00853	1.00929	1.01549	1.01241	1.02677	1.0429	1.02292	1.02722	1.01921	1.00863	1.00587	1.01849	1.01246	1.01033	1.02357	1.00064	1.01948	1.0147	1.00456	1.01499	1.04006	1.02514	1.01372	1.01881	1.01404	1.00291	1.00281	0.99895	1.01646	0.960861	0.926577	0.917267	0.961494	0.973484	0.985497
	1.33073	1.00329	0.98962	0.98701	0.988842	0.997612	1.02303	1.00518	0.984785	0.998812	0.964156	0.93657	0.908344	0.978845	1.00238	1.03009	1.02055	1.00936	1.02983	1.03342	1.01796	1.00967	1.00637	1.02681	1.02677	1.03163	1.02752	1.01181	1.01234	0.993656	1.01196	0.996858	1.0114	1.01711	1.00798	0.99817	1.00983	0.991515	1.01483	1.00547	1.00252	1.00574	1.0026	0.987437	0.911574	0.906674	0.963852	0.981273	0.999486
	1.33062	1.01355	0.997326	1.01059	0.987925	1.00581	1.01541	1.01305	0.970231	0.979977	0.963688	0.935201	0.931657	0.985479	1.00354	1.00907	1.01347	1.01305	1.0248	1.01881	1.02008	1.0254	1.01239	1.00638	1.02134	1.02823	1.01271	1.00688	1.01276	1.00653	1.02923	1.02941	1.01073	1.01631	1.02984	1.00757	1.02295	1.01516	1.00991	1.01783	1.01755	0.999649	1.01341	0.993125	0.937295	0.915835	0.96416	0.993765	1.00676
	1.33051	1.00182	1.00667	1.01115	1.01603	1.01088	1.00366	1.01305	0.973032	0.983299	0.97859	0.928057	0.94307	1.00581	0.997876	1.01431	1.01307	1.03081	1.01657	1.02282	1.04934	1.01554	1.02619	1.0197	1.00594	1.01041	1.01778	1.00025	1.02198	1.02201	1.01624	1.02453	1.03646	1.01617	1.02498	1.02498	1.0326	1.01219	1.00899	1.02291	1.0384	1.02171	1.01932	0.99495	0.962316	0.89435	0.96278	0.997555	0.993983
	1.3304	1.02625	1.0045	1.01271	1.00197	0.993955	1.0206	1.00735	0.999765	0.96194	0.970412	0.921168	0.966983	1.00292	1.01354	1.0211	1.00731	1.00947	1.00545	1.02745	1.05322	1.02296	1.02392	1.01715	1.026	1.02398	1.02501	1.01365	1.02911	0.994399	1.03075	1.02034	1.01444	1.01379	1.01968	1.01634	1.00353	1.00851	1.01343	1.00974	1.02204	1.00281	1.00089	1.01058	0.974124	0.925157	0.958904	0.969829	0.991401
	1.33029	1.00254	1.02383	1.00181	0.987538	1.01408	0.997456	1.01322	0.992489	0.97571	0.946492	0.923537	0.947574	1.00169	1.03105	1.02583	1.0155	1.00969	1.02861	1.01732	1.01948	1.03142	1.01023	1.03381	1.00638	1.02445	1.03708	1.01719	1.03804	1.02833	1.01361	1.0195	1.01318	1.02707	1.01591	1.01382	1.01599	1.01541	1.00789	1.02287	1.02047	1.01749	1.02126	1.00915	0.982104	0.905532	0.965106	0.991366	1.00739
	1.33018	1.01186	1.00364	1.00596	0.9954	1.00529	0.994722	0.998815	0.982974	0.979823	0.950801	0.906448	0.966819	1.00452	0.988055	1.01255	1.01996	1.02011	1.03777	1.02109	1.01038	1.04147	1.02175	1.0304	1.02605	1.02913	1.01894	1.02242	1.01611	1.00871	1.01831	1.02972	1.0159	1.00139	1.03577	1.00502	1.03554	0.990666	1.0234	1.03099	1.03029	1.02918	1.01839	1.01079	0.981835	0.90382	0.956793	0.964575	1.01113
	1.33007	1.01237	1.00827	1.01626	0.999953	1.00886	0.987556	1.01051	0.973728	0.975109	0.954484	0.899731	0.971575	0.995906	0.999612	1.01537	1.00482	1.04072	1.01179	1.02903	1.03317	1.03516	1.01235	1.01696	1.02449	1.01052	1.00496	1.00633	1.00691	1.0156	1.019	1.03161	0.996233	1.01993	1.02511	1.01983	1.00613	1.03123	1.01271	1.02219	1.02562	1.00384	1.03002	0.994726	0.996517	0.905805	0.926473	0.953976	0.98804
	1.32996	1.00028	1.00669	1.00777	1.01946	0.990317	0.990515	1.00912	0.974447	0.978306	0.945728	0.914971	0.969622	1.00732	1.00866	1.02325	0.989404	1.01667	1.0301	1.02151	1.02791	1.0253	1.01575	1.02525	1.01047	1.01598	1.01474	1.01606	1.01152	1.01667	1.02437	1.01881	1.00731	1.01073	1.02747	1.03332	1.01878	1.00664	1.01595	0.99723	1.02508	1.03077	1.03409	0.997842	0.987823	0.907045	0.938185	0.979091	1.00142
	1.32985	1.00915	0.999614	1.01501	1.00377	0.995961	0.997494	0.985248	0.971808	0.969458	0.944008	0.882547	0.985644	0.990908	1.0389	1.00921	1.01012	1.01035	1.01968	1.0218	1.01054	1.00574	1.02942	1.02671	1.03096	1.00184	1.01221	1.02054	1.02004	1.02471	1.00946	1.01318	1.02326	1.01154	1.02781	1.02629	1.00174	1.00924	1.01393	0.98409	1.01962	1.0086	0.998394	0.995637	0.997916	0.913275	0.943078	0.970032	0.998893
	1.32974	1.00582	1.00576	1.01054	1.00463	1.00358	0.996015	1.00825	0.977962	0.961916	0.925497	0.937386	1.01422	1.00452	1.00172	1.00793	1.01144	1.03327	1.01135	1.02311	1.01726	1.01329	1.00857	1.02469	1.02564	1.0091	1.01414	1.0183	1.03867	1.01786	1.02563	0.997174	1.01975	1.01625	1.02339	1.02883	1.0028	1.03131	1.02069	1.02378	1.02573	1.01205	1.01475	0.977809	0.995518	0.933536	0.941047	0.981996	0.983377
	1.32963	1.02734	1.0135	1.01479	0.998503	1.01515	1.00403	0.995208	0.988522	0.958551	0.925737	0.94309	1.00126	0.998106	1.00928	1.03384	1.00033	1.02098	1.01696	1.01427	1.01633	1.03041	1.02242	1.01785	1.01218	1.0303	1.03495	1.02579	1.00401	1.00257	1.01734	1.00479	1.01245	1.01479	1.01185	1.01313	1.02998	1.02902	1.03966	1.0179	1.02813	0.98177	1.01725	0.99917	0.994294	0.941215	0.937317	0.960761	0.989657
	1.32952	1.00513	1.03087	1.02483	1.00452	1.00251	0.987122	0.976513	1.00166	0.959881	0.93768	0.918109	1.00288	1.00892	1.03228	1.00099	1.00951	1.01178	1.03562	1.04456	1.02251	1.01752	1.01946	1.03336	1.01559	1.00556	1.02398	1.00884	1.03192	1.02541	1.01714	1.02903	1.02219	1.00231	1.02835	1.03108	1.03172	1.01958	1.01528	0.992448	1.03026	1.01779	1.00764	0.997982	1.01009	0.950422	0.91356	0.964376	0.975212
	1.32941	1.01615	1.0017	1.02083	1.02858	0.999401	0.996525	0.985881	0.98707	0.967403	0.916141	0.947113	1.00494	0.987677	1.01944	1.00331	1.02697	1.03021	1.03798	1.02937	1.05609	1.01176	1.00527	1.03568	1.00175	1.01531	1.0116	1.0146	1.01206	1.0217	1.02462	1.01177	1.03086	1.03454	1.01769	1.02636	1.01185	1.01611	1.00828	1.02826	1.00588	1.02528	1.00279	1.00181	1.00777	0.949432	0.929962	0.954094	0.985685
	1.3293	1.00524	1.00264	1.01727	1.03213	0.999376	0.994175	1.0045	0.970802	0.966342	0.915772	0.974519	1.01033	1.02231	1.0338	1.00878	1.00968	1.03285	1.01885	1.01898	1.05829	1.01761	1.02553	1.02874	0.980514	1.01843	1.02292	1.02355	1.02946	1.0142	1.02082	1.01538	1.00306	1.04405	1.00428	1.01828	1.05043	1.00647	1.03344	1.02097	1.0278	1.02154	1.0164	0.991353	1.00078	0.981993	0.899428	0.95247	0.978768
	1.32919	0.992811	1.02554	1.00918	0.996861	0.9902	0.996127	0.992669	0.971125	0.956135	0.903965	0.957563	0.999891	1.01571	1.02189	1.0063	1.00736	1.02671	1.01541	1.00951	1.01931	1.00658	1.01998	1.03731	1.01817	1.00609	1.01941	1.02113	1.02296	1.05027	1.01829	1.01286	0.987694	1.00056	1.01896	1.01723	1.02393	1.01605	1.01543	1.03185	1.02306	1.02663	1.01656	1.01002	0.999526	0.966839	0.911303	0.96963	0.956893
	1.32908	1.01372	1.00989	1.03079	1.01103	0.984984	0.994859	1.02028	0.970751	0.938218	0.921004	0.964122	0.990029	1.01191	1.00494	1.04355	1.01483	1.01784	1.02166	1.02402	1.00845	1.01495	1.01014	1.02786	1.0269	1.02309	1.03264	1.02225	1.01418	1.01052	1.01845	1.00786	1.03393	0.999183	1.00566	1.00784	1.01324	1.016	1.00948	1.02233	1.01693	1.01668	1.00789	0.993242	0.988039	0.980198	0.928043	0.948132	0.979431
	1.32897	0.992556	1.0165	1.01099	0.982135	0.974354	1.0132	1.0173	0.973626	0.938251	0.921521	0.995178	0.998594	1.01095	1.01829	1.01227	1.01995	1.02493	1.01684	1.04399	1.00849	1.00609	0.997899	1.02407	1.01707	1.03431	1.00991	1.02587	1.02957	1.03077	1.01598	1.03575	1.01332	1.02719	1.06034	1.0176	1.0251	0.999463	1.02022	1.0209	1.01833	0.998183	1.0354	0.9903	1.01825	0.968903	0.926264	0.937158	0.972055
	1.32886	0.994664	1.00129	1.02525	1.02264	1.0121	0.986544	0.992534	0.976587	0.947197	0.913107	0.992957	0.994656	1.02242	1.00411	0.991	1.01113	1.01222	1.02492	0.999197	1.03292	1.01763	1.02836	1.02152	1.02434	1.03305	1.01617	1.01786	1.01187	1.01439	1.03382	1.00689	1.02493	1.02343	1.02909	0.999694	1.0375	1.03506	1.03786	1.03066	1.03841	1.01046	1.0358	1.00207	1.01131	0.986612	0.900567	0.94093	0.950509
	1.32875	1.01322	1.00893	1.01458	1.0113	1.01348	0.979308	0.992719	0.956891	0.955422	0.938654	1.01318	1.00524	1.00716	1.01369	1.02564	1.00756	1.02549	1.0333	1.01221	1.00629	1.03699	1.01276	1.02031	1.01488	1.02826	1.00581	1.01574	1.0087	1.02083	1.0146	1.00658	1.03572	1.02993	1.02807	1.01175	1.02935	1.0145	1.03343	1.0085	1.01105	1.00267	1.02074	0.988872	1.00895	0.991862	0.927536	0.938807	0.948667
	1.32864	1.02509	1.00459	1.02115	1.0067	1.00177	0.977412	0.983012	0.97912	0.928433	0.940003	0.991123	1.0099	1.01575	0.983261	1.03751	1.01351	1.02226	1.02985	1.03957	1.04375	1.0057	1.02354	1.0155	0.998267	1.02351	1.00833	1.01359	1.03098	1.02854	1.01604	1.05217	1.02244	1.01304	1.04234	1.01773	1.0301	1.01472	1.04624	1.04059	1.02345	1.018	1.00073	1.00124	1.02127	0.970773	0.940165	0.915463	0.945065
	1.32853	1.02293	1.00348	1.02209	1.0237	0.979688	0.988742	0.991479	0.964888	0.930103	0.986137	0.994974	0.979606	1.00622	0.995757	1.02088	1.00888	1.01235	1.01469	1.03134	0.990949	1.02013	1.01532	1.02894	1.01261	1.02347	1.01857	1.02738	1.00774	1.02472	1.02116	1.02975	1.01985	1.01709	1.01803	1.01383	1.02803	1.00784	1.04075	1.02979	1.01589	1.0351	1.0237	0.991934	0.999556	0.967095	0.956367	0.915522	0.966812
	1.32842	1.0023	1.02448	1.02266	1.0113	0.984356	0.994446	0.992201	0.948357	0.913582	0.985539	1.01414	1.00228	1.01786	1.02109	1.01489	1.0266	1.0091	1.00178	1.00746	1.02224	1.03779	1.02167	1.01792	0.992108	1.0382	1.01626	1.02507	1.03102	1.04858	1.02632	1.00092	0.998523	1.01348	1.03485	1.01476	1.03089	1.00675	1.0269	1.01565	1.00809	1.01645	1.03239	1.01188	0.995367	0.991372	0.977643	0.910523	0.968383
	1.32831	1.00677	1.02202	1.01896	1.00104	0.984538	0.991132	1.00685	0.966561	0.913137	0.970108	0.99133	0.993603	1.00728	0.997091	1.03728	1.01021	1.01458	1.04621	1.02885	1.02195	1.0358	1.04055	0.998969	1.02352	1.02021	1.00839	1.02522	1.02978	1.02666	1.01444	1.02899	1.00814	1.01306	1.06719	0.999068	1.01874	0.995494	1.03571	1.01392	1.02233	0.996776	1.01425	0.989915	1.02147	0.984227	0.96234	0.923762	0.947468
	1.3282	1.00452	1.00895	1.01911	1.00227	1.00211	0.981099	0.986483	0.961522	0.907496	0.96752	0.988753	0.996264	1.00567	0.987658	1.02552	1.016	1.02142	1.01887	1.03503	1.00244	1.0329	1.01638	1.02142	1.03351	1.0164	1.01366	1.01163	1.02288	1.02532	1.0025	1.01018	1.00866	1.03416	1.0414	1.01065	1.02769	1.00854	1.03323	1.0212	1.01262	1.02447	1.00872	1.00955	0.999532	0.98709	0.971018	0.89352	0.947086
	1.32809	1.01709	1.01423	1.01531	0.99158	1.01479	0.988282	0.978077	0.946275	0.904763	0.992251	0.985109	1.01176	1.00155	1.00808	1.02744	1.01226	1.02384	1.03456	1.03318	1.02324	1.00973	1.02164	1.02462	1.02539	1.03745	1.03905	0.99341	1.02526	1.02869	1.0252	1.00822	1.01804	1.00678	1.04283	1.0225	1.03389	0.998192	1.02372	1.01916	1.00503	1.03133	1.01442	1.00216	1.01595	0.990905	0.975802	0.907333	0.956969
	1.32798	1.01439	0.999721	1.00637	1.01938	1.02551	0.993787	0.970474	0.940433	0.907596	1.00992	0.999217	1.02691	1.01102	1.01813	1.01611	1.01883	1.01311	1.02821	1.04224	1.03414	1.03604	1.02927	0.996651	1.0255	1.02553	1.03595	1.01029	1.01721	1.00603	1.01846	1.01035	1.01003	1.02269	1.05084	0.99588	1.02968	0.99852	1.03365	0.994539	1.01496	1.02456	1.01671	1.02093	1.00875	1.00416	1.00205	0.910448	0.934477
	1.32787	1.02297	1.01961	1.00132	1.0068	0.959247	0.984702	0.984176	0.945653	0.923763	0.991661	0.999682	1.0215	1.00402	1.01281	1.0216	1.01905	1.01224	0.9985	1.03598	1.02686	1.04071	1.00556	1.03047	1.01576	1.02329	1.01496	1.01416	1.02402	1.01852	1.01721	1.03603	1.00863	1.02035	1.03409	1.01092	1.03798	1.00836	1.01855	1.00364	1.03312	1.00742	1.01458	0.998228	1.01087	0.997695	0.987132	0.918416	0.954062
	1.32776	1.00418	0.998927	1.01412	0.993548	0.997582	0.973027	0.987091	0.931352	0.927314	1.00997	0.994719	1.01075	0.996259	1.00963	1.03038	1.0057	1.01729	1.02445	1.02069	1.0039	1.02838	1.00998	1.02476	0.998436	1.01464	1.01717	1.00065	1.0183	1.02676	1.01834	1.00795	1.02388	1.02982	1.03442	1.02889	1.01849	1.00789	1.02421	1.03226	1.01981	1.03892	1.02059	1.0324	1.02925	0.987718	0.980754	0.944823	0.937134
	1.32765	1.02026	0.99202	1.03326	1.01097	0.973732	0.980336	0.965936	0.941958	0.949161	0.998997	0.988365	1.01056	1.00931	1.01941	1.03319	1.00909	1.01041	1.02721	1.02767	1.03476	1.01239	1.00999	1.01925	1.04123	1.03686	1.01687	1.00835	1.02268	1.02587	1.00288	1.01969	1.03763	0.995378	1.029	1.03102	1.03178	1.01966	1.03269	1.01332	1.00702	1.01981	1.01726	1.01194	1.01657	1.00495	0.985512	0.947013	0.938706
	1.32754	1.01865	1.01391	1.01058	1.01951	1.00288	0.992496	0.947225	0.935832	0.968442	1.01731	0.994663	0.995552	1.02922	1.01936	0.997985	1.02809	1.02573	1.03949	1.01162	0.99628	1.03256	1.03496	1.01097	1.01812	1.02405	1.01442	1.03139	1.00187	1.04511	1.0343	1.02607	1.02403	1.01889	1.02207	0.990433	1.02489	1.01255	0.993681	1.00953	1.01061	1.00527	1.00268	0.994243	1.03622	0.988924	1.00117	0.947127	0.916986
	1.32744	1.01911	0.999572	1.02241	0.998243	0.997332	0.976838	0.972809	0.936293	0.958718	0.975316	1.0037	1.02261	0.995935	1.0169	1.03412	1.00694	1.01508	1.02124	1.02346	1.03732	1.01067	1.01489	0.990565	0.995693	1.0409	1.02013	1.02214	1.01982	1.02748	1.03444	1.02613	1.00383	1.02266	1.03416	0.999597	1.05018	1.01015	1.01914	1.00716	1.02408	1.02351	1.03531	1.01574	1.04355	0.98242	0.996674	0.961907	0.937834
	1.32733	0.992523	1.04233	1.03634	1.01599	0.977233	0.993835	0.968412	0.907237	0.976199	1.01295	1.00723	0.994926	1.00439	1.023	1.00904	1.03697	1.01188	1.00954	1.0311	1.03268	1.02541	0.983313	1.01197	1.00718	1.01385	1.01532	1.00008	1.0235	1.01233	1.00997	1.02637	1.02945	1.02788	1.02712	1.01774	1.01451	1.01537	1.03871	1.0184	1.02967	1.0235	1.02434	1.01051	1.01589	0.982321	1.00725	0.990341	0.901341
	1.32722	1.00126	1.00792	0.997749	1.00802	0.995803	0.979474	0.979639	0.908862	0.979957	1.03133	1.01295	1.0349	1.03028	0.998354	1.00662	1.01953	1.01305	1.0132	1.00899	1.01176	1.01549	1.00403	1.0332	1.00848	1.02253	0.998847	1.0045	1.03414	1.02396	1.02044	1.01603	1.04165	1.01112	1.02728	1.02653	1.02461	1.00801	1.02306	0.998267	1.02458	1.01585	1.01788	1.00672	1.01602	1.00619	0.995798	0.987107	0.894773
	1.32711	0.993414	1.01711	0.995585	0.996377	0.996712	0.979995	0.968234	0.905781	0.996251	1.02364	0.981518	1.01014	1.01241	1.01922	1.00885	1.00966	1.01334	1.02345	1.02401	1.01569	1.04293	1.02056	1.02325	1.01186	1.05104	1.03744	1.02056	1.00563	1.0161	1.02565	1.01188	1.03395	1.00772	1.01976	1.01188	1.03826	1.025	1.03628	0.998029	1.02661	1.02082	1.04863	0.995332	1.00767	1.01514	0.987448	0.985535	0.91072
	1.327	1.00128	1.00912	1.01975	1.00929	0.970333	0.961023	0.948433	0.909557	1.00378	1.01583	0.98853	1.00386	1.05116	1.00032	1.02168	1.02158	1.02444	1.01093	1.02149	1.00408	1.04025	1.0103	1.02992	0.996529	1.02088	1.00864	1.03687	1.00691	1.01607	1.0257	0.995688	1.0105	1.01431	1.02911	1.01468	0.998077	1.01959	1.00456	1.01063	1.03514	1.04584	1.01976	0.990537	1.03951	1.01617	0.99532	0.967787	0.920298
	1.32689	1.02594	1.01263	1.01313	0.986514	0.989278	0.950633	0.958137	0.89724	0.982691	1.00304	1.01481	0.993487	1.02117	0.99752	1.01791	1.02948	1.0222	1.0319	1.04148	1.00386	1.03797	0.997095	1.03709	1.04001	1.01166	1.01485	1.01143	1.0133	1.0342	1.02856	1.02578	1.01164	1.02404	1.01048	1.01898	1.01507	1.03019	1.02801	0.997142	1.0162	1.01084	1.01429	1.01177	1.01533	1.02252	1.00579	0.981893	0.903946
	1.32678	0.996517	1.00094	0.996857	1.01054	0.984	0.966705	0.947526	0.908275	1.00018	1.01355	1.00939	1.02135	1.03467	1.01524	1.02476	1.02222	1.02387	1.00441	1.03393	1.01606	1.04239	1.0063	1.02761	1.02668	0.992716	1.00808	1.00586	1.0144	1.00178	1.0101	1.0131	1.00687	1.03415	1.03095	1.02088	1.01942	1.03019	1.02978	1.02045	1.03395	0.995548	0.993974	1.00419	1.00236	0.983911	1.01268	0.994199	0.941906
	1.32667	1.01102	0.995964	1.01501	1.02716	0.960931	0.964352	0.923199	0.922666	0.984488	1.00022	1.0198	0.99861	1.01493	1.02478	1.02217	1.01276	1.01264	1.02356	1.03592	1.03316	1.02021	1.01183	1.00532	1.03973	1.0148	1.02659	1.00661	1.01829	1.04002	1.01084	0.999553	1.00349	1.03164	1.0372	0.993938	1.00687	1.03751	1.02934	1.01117	1.01799	1.03433	1.00697	1.02785	1.03036	1.01101	1.00718	1.01591	0.941219
	1.32656	1.00254	1.01683	1.00807	0.990407	0.984263	0.983275	0.953136	0.926627	1.02745	1.007	1.01073	1.00618	1.0283	1.03334	1.03496	1.03425	1.02926	1.02965	1.01911	1.00918	1.00699	1.00618	1.03109	1.0344	1.03588	0.996197	0.999195	1.03347	1.02507	1.01659	1.0235	1.04506	1.00711	1.04081	1.03757	1.01695	1.02005	1.05075	1.03177	1.02256	1.01585	0.996497	1.01882	1.01621	1.00802	1.00659	0.990446	0.946076
	1.32645	1.02362	0.979025	1.01494	1.01494	0.983738	0.962376	0.967375	0.928128	0.993534	1.01413	1.02372	1.00726	0.99245	1.01918	1.04042	0.993168	1.02538	1.03151	1.04161	1.00767	1.04144	1.02718	1.03898	1.01413	1.00949	1.03986	1.01785	1.02406	1.01122	1.0544	1.02824	1.039	1.02717	1.01533	1.01995	1.0141	1.00496	1.01085	1.0197	1.03524	1.04253	1.01926	1.00575	1.02206	1.02351	0.989246	0.967082	0.96844
	1.32634	1.023	0.981818	1.01732	0.998684	0.988431	0.968721	0.935139	0.938657	0.986416	1.00705	1.03626	1.01388	1.02532	0.991142	1.023	1.00591	1.03174	1.01135	1.01172	1.01976	1.0216	1.01509	1.02562	1.02774	1.02247	1.01671	1.02358	1.0001	1.0112	1.00705	1.00625	1.02312	1.00831	1.01069	1.02642	1.03263	1.03951	1.0289	1.00396	1.01374	1.0014	1.03399	1.0068	1.01198	1.00204	0.998211	0.972125	0.969616
	1.32623	1.01386	1.00268	0.998482	1.01274	0.950776	0.949903	0.941169	0.950519	0.990305	0.988931	1.01571	1.02281	1.02197	1.01138	1.0405	1.01672	1.03089	1.03146	1.03329	1.02481	1.04233	1.00904	1.01631	1.04734	1.02546	1.02706	0.998116	1.01374	1.02074	1.00173	0.999515	1.02315	1.0174	1.02301	1.02405	1.02964	1.00244	0.996	1.04285	1.00905	1.02358	1.02147	1.02556	1.02866	0.986823	1.01366	0.989883	0.9621
	1.32612	0.987346	1.00547	0.999935	0.992604	1.00982	0.965039	0.896976	0.962809	1.01459	1.0353	1.01196	1.0107	1.00924	1.00821	1.01087	1.01526	1.01638	1.00995	1.01932	1.03462	1.00086	1.01852	1.01945	1.02346	1.01595	1.03648	0.996381	1.03721	1.00607	1.01627	1.01578	1.03988	1.01907	1.01374	1.04982	1.02699	1.00189	1.04302	1.014	1.02693	1.02857	1.01498	1.01996	1.04848	1.01048	0.988539	0.974473	0.983827
	1.32601	1.01319	1.01709	0.995766	1.01907	0.974205	0.983241	0.901415	0.978893	0.994769	0.977138	1.01886	1.00386	1.02266	1.03349	1.03824	1.01079	1.02858	1.00518	1.01777	1.00262	1.04483	1.02876	1.04298	1.03015	1.04498	1.0115	0.998595	1.01493	1.00543	1.00726	1.0087	1.00587	1.01881	1.02481	0.997473	1.01293	1.014	1.01237	1.02502	1.01557	1.0304	1.00503	1.04265	1.0298	1.01547	0.981765	1.00826	0.981379
	1.3259	1.00281	1.01867	1.01045	0.991962	0.944294	0.95359	0.903814	0.980791	1.01854	0.999023	1.03822	1.00223	1.01058	1.02221	1.01398	1.02417	1.02768	1.03312	1.03597	1.04568	1.03156	1.03239	1.03973	1.02043	1.03017	1.01622	1.00439	1.00912	1.00528	1.01557	1.01042	1.02146	1.02045	1.0508	1.027	1.02303	1.04206	1.01404	1.03666	1.01912	1.03603	1.01519	1.03129	1.01397	1.00615	0.99438	0.969466	0.974835
	1.32579	0.981805	0.997812	1.01691	1.00705	0.982732	0.960255	0.911325	0.975468	1.0188	0.995886	1.01954	1.0196	1.01898	1.01563	1.00107	1.01929	1.01705	1.02488	1.03817	1.01752	1.02502	1.01074	1.03325	0.995162	1.01822	1.02747	1.03446	1.03058	1.01569	1.01385	1.01914	1.00902	1.04388	1.02507	1.0154	1.04041	1.02851	1.02073	0.988915	0.991686	0.997467	1.00474	1.03278	1.04242	1.00393	0.996828	1.01047	0.994702
	1.32569	0.984227	1.00534	1.00661	1.00867	0.976957	0.967286	0.919667	0.976529	1.02324	1.01931	1.01665	1.0246	1.05597	1.04506	1.00209	1.03054	1.02725	1.01697	1.01778	1.00375	1.02696	1.03035	1.03377	1.017	1.02661	1.01742	1.01602	0.988215	1.01192	1.00806	1.03004	1.00869	1.01848	1.02871	1.00524	1.02868	1.02495	0.992241	0.979865	1.02834	1.01632	1.02824	1.00548	1.04335	0.995651	0.996395	1.02668	0.962177
	1.32558	0.960747	1.01805	0.986434	0.986297	0.97341	0.954393	0.915884	0.972766	0.994573	1.01954	0.996657	0.982041	1.00631	1.0169	1.0245	1.01662	1.02766	0.99971	0.998452	0.998216	1.00527	1.00903	1.04515	1.0551	1.03558	1.002	1.0418	1.0364	1.01192	0.996799	1.02484	1.02526	1.03536	1.00384	1.03555	1.03641	1.02309	1.02477	0.988755	0.997929	1.02357	1.03234	1.02189	1.01778	1.02487	0.998482	1.02643	1.03166
	1.32547	0.975695	0.99701	1.02575	1.00026	1.01054	0.937649	0.906682	0.958371	1.01034	1.00909	1.02384	0.994157	1.03364	1.02412	1.0231	1.01701	1.02305	1.03583	1.05538	1.00697	1.0196	1.00533	1.02512	1.02073	1.02273	1.0297	1.05147	1.03879	0.988714	1.03029	1.0431	1.00957	1.06183	1.02551	1.04591	1.0299	1.02465	1.03626	1.03693	1.02764	1.01778	1.01373	1.02656	0.9987	0.997906	0.996734	1.00206	0.999573
	1.32536	0.996328	0.993455	0.984237	1.0175	0.996532	0.939712	0.949085	0.96925	1.01078	1.00001	1.03481	1.03228	1.01692	1.02228	1.02501	1.02863	1.0341	1.02493	1.02731	1.01644	1.01765	1.0166	1.00822	1.00215	1.01689	1.02072	1.00772	1.02078	1.00385	1.01869	1.00961	0.987778	1.03996	1.0314	0.988092	1.03978	1.00206	1.03672	1.00122	1.01241	1.03757	1.00411	1.02308	1.0023	1.01588	0.997047	1.0221	0.997329
	1.32525	1.01895	0.991202	1.00944	1.00178	0.98114	0.923772	0.972522	0.984894	1.05169	1.02629	1.0079	0.986558	1.02801	1.00733	1.00089	1.01946	1.00209	1.01396	1.00438	1.02052	1.02539	1.0206	1.00579	0.986917	1.03013	1.00572	1.04645	1.04107	1.01745	1.03251	1.04805	1.01936	1.04456	1.01794	1.0305	1.04295	1.01281	1.02398	1.01507	1.01042	1.02975	1.02206	0.991858	1.01323	0.989637	0.995969	1.00143	0.972864
	1.32514	0.990623	0.975171	0.992284	0.975888	0.976615	0.91745	0.955553	1.02168	1.00967	1.03516	1.01164	1.03305	1.01566	1.01838	1.02168	1.01575	1.01316	1.05527	1.00999	1.04614	1.02142	1.01892	1.02758	0.992064	1.00822	1.04185	1.01274	1.04592	1.01742	1.01627	1.01518	1.03207	0.981036	1.0094	1.01291	1.02383	1.01984	0.991097	1.02432	0.995599	1.01915	1.03761	1.00405	0.990215	1.00143	0.998156	0.995183	1.00141
	1.32503	0.997695	1.00692	1.01774	0.968051	0.96914	0.928392	0.971672	0.989683	1.0099	1.03622	1.01526	1.02312	1.03512	0.960851	1.01383	1.01805	1.03726	1.02848	1.02606	1.00043	1.02349	0.996784	1.01332	1.02932	1.02181	1.03054	1.02171	1.01531	1.02388	1.0421	1.01066	1.01693	1.02835	0.998166	1.03096	1.02894	1.00429	0.985561	0.999933	1.01674	1.03483	1.00721	1.02643	1.01799	1.03067	0.994174	0.99598	1.00096
	1.32492	1.01504	0.95734	1.01733	0.99495	0.950905	0.930443	0.976807	1.00196	0.98364	1.02037	1.02621	1.0211	1.00722	0.998672	1.03312	0.99308	1.00127	1.01658	1.00243	1.03068	1.04381	1.05323	1.00218	1.02111	1.0233	1.02023	1.00394	1.01476	1.01727	1.04525	1.03351	1.03769	1.02853	1.03835	1.01096	1.01832	1.01855	1.01705	0.999828	1.051	1.03067	1.00662	0.999211	1.03851	1.00474	1.06139	1.01508	1.0165
	1.32481	0.991192	1.01302	1.00995	0.974014	1.01363	0.919001	0.999068	1.00144	0.998232	1.04717	1.03636	1.01653	1.01466	1.00609	1.00902	0.987584	1.02913	1.03571	0.985338	1.02244	1.00486	1.00848	1.0102	1.04032	1.05667	1.01323	0.984605	1.01889	0.993338	1.03401	1.01705	1.03596	1.0238	1.03396	0.998864	1.02352	1.0157	1.04109	1.00549	1.03264	1.00792	1.04244	1.01781	0.994048	1.01501	1.01108	0.994785	0.994537
	1.3247	1.00568	1.00693	1.01484	1.005	0.956476	0.933023	0.959415	0.996498	1.04115	0.997885	1.0099	1.02813	1.04466	1.01978	1.02314	1.03008	1.01186	1.03812	1.02478	1.01536	1.00185	1.05771	1.03704	1.03351	1.00584	1.0057	0.99199	1.03614	0.99965	1.01666	1.02713	1.03376	1.0237	1.01468	1.00339	1.00865	1.03021	1.02744	1.04864	1.01207	1.00962	1.01419	1.03881	1.01939	1.00982	1.03681	0.982696	0.996429
	1.32459	0.969918	0.963945	1.01132	0.988718	0.969262	0.926512	0.99427	0.995476	0.96534	1.0323	1.02282	1.02105	1.03392	1.00494	0.991713	1.03446	1.00969	1.03502	1.02511	1.00554	1.02877	1.01838	1.00709	1.03158	1.00947	1.01486	1.00754	1.02277	1.02237	0.994267	1.0333	1.06301	1.02899	1.02481	1.02816	1.01105	1.0359	1.0286	1.00937	1.01766	1.01133	1.02913	1.00908	0.997256	1.0035	0.997156	1.02374	1.01413
	1.32449	0.994345	0.971899	0.99089	0.999788	0.949561	0.920313	0.993805	1.01152	1.0112	1.03389	0.972808	1.00821	1.01087	1.02471	1.01599	0.997673	1.00728	1.00204	0.988641	0.999814	1.02094	1.0377	1.01176	1.02946	0.992487	1.01953	1.05316	1.03101	1.03412	1.01272	1.01394	1.02367	1.04359	0.996608	1.01129	1.02281	1.03021	1.0295	1.04136	1.01783	1.01675	1.00818	0.975197	1.0048	0.971012	1.01052	1.00629	0.965567
	1.32438	0.964529	1.00442	0.985613	0.98217	0.973649	0.904569	0.993478	1.00366	1.00645	1.02149	1.04006	1.04593	1.00149	1.00554	1.04128	0.99457	1.00441	0.998581	1.04882	1.03645	1.05958	1.02789	1.03701	1.0272	0.990246	1.05285	1.02915	1.06935	1.00755	1.00503	1.00116	1.03969	1.01083	1.01914	1.03309	0.995747	1.01772	1.03676	1.00699	1.02769	1.01941	1.01116	1.02591	1.02544	1.02896	0.997538	1.01694	1.02954
	1.32427	0.98058	0.999267	0.947958	0.991419	0.953304	0.923107	0.992944	1.01385	1.01552	1.00757	1.01906	1.00375	1.0315	1.03081	1.02203	1.00246	1.00694	1.04984	1.0108	1.00094	1.00178	1.0105	1.04166	1.04343	1.04832	1.0217	1.032	1.03449	1.03652	1.00718	1.03974	1.05094	1.05362	1.01255	0.995504	1.04401	1.01396	1.02216	0.967725	1.02491	1.03596	1.01109	1.02818	1.03212	1.00765	1.00725	1.03253	0.992286
	1.32416	0.987424	0.99558	0.998031	1.01016	0.896001	0.944934	0.961054	0.996275	1.02258	1.02943	1.04901	1.01154	0.98635	1.00621	1.01921	1.05979	1.02532	1.00013	1.01049	0.993832	1.04714	1.00705	1.02639	1.04862	1.01588	1.02478	1.06441	1.04914	1.02332	1.04786	1.04046	1.00301	1.01599	1.00565	1.00826	0.98799	1.00405	0.977872	1.00521	1.0389	1.01225	1.0248	1.00836	1.01705	1.01956	0.977721	1.02259	0.992013
	1.32405	0.989605	0.952369	0.985946	0.982395	0.940215	0.980433	0.973404	1.00111	1.02103	1.04189	1.07074	1.0044	1.00237	1.04913	1.00595	1.078	1.00663	1.05137	1.02731	1.02014	0.98225	0.956053	1.01619	1.00805	0.977507	1.02824	1.06687	1.0534	1.00536	1.02329	1.00524	1.04234	1.04517	1.04387	1.03638	1.02476	1.03739	1.01948	1.05338	1.01872	0.99027	1.02191	1.03714	1.0042	0.954476	1.02865	0.984807	1.02765
	1.32394	0.9851	0.990934	0.98847	0.980859	0.932513	0.971947	0.98804	1.00027	1.00877	1.00765	0.990559	1.02444	1.005	1.03218	0.987918	0.994545	1.03411	1.03072	1.06089	0.999074	0.969709	0.9886	1.00506	1.02179	0.989296	1.03546	1.01146	1.01591	1.02379	1.05024	1.05813	1.00133	0.996245	1.03335	1.02266	1.03223	1.01591	1.04135	1.0462	1.00469	1.00392	1.02968	0.995084	1.02845	0.981652	1.01042	1.03577	1.00739
	1.32383	0.961677	1.00697	0.975194	0.980342	0.921735	0.938221	0.957536	0.952546	1.02026	1.01506	0.985753	1.02457	1.03333	0.988622	1.00876	1.03048	1.04623	1.00559	1.05432	1.01716	1.05085	1.03706	1.02357	1.02187	1.02897	1.07317	1.01754	1.00804	1.00049	1.02712	1.05146	1.0041	1.01104	0.996786	0.997334	1.05466	0.990729	1.02695	1.03157	1.06869	1.01462	0.984874	1.0191	1.01101	0.991017	1.02306	1.02192	1.04455
	1.32372	0.970072	0.967976	0.977063	0.946366	0.936376	0.97631	1.00121	0.994839	1.04067	1.04661	1.00302	0.990796	1.00461	1.04437	1.0275	1.02377	0.991843	1.02061	1.02824	1.0173	1.00407	0.98683	1.00786	1.02981	1.00165	1.00976	1.00621	1.05155	1.03581	1.01523	1.01171	1.06075	1.04299	1.02615	1.01923	1.0254	1.00853	0.987619	1.07327	1.03398	1.00367	1.02999	1.00066	1.00033	0.979976	1.02012	1.00116	1.00727
	1.32361	1.00148	0.967282	0.987425	0.966732	0.935635	0.9438	1.01627	1.00575	0.975925	1.01163	1.00652	0.994451	1.02768	1.03318	1.01242	1.04093	1.02869	1.02083	1.02444	1.04512	1.02785	1.02602	1.01978	1.00624	1.05293	1.01733	1.03235	1.07254	1.00446	1.01166	1.01215	1.01593	1.03448	0.996968	0.976446	1.02956	0.972982	1.03067	0.972503	1.0382	1.04555	1.03028	1.03026	1.01813	0.972011	1.04649	1.02142	1.00028
	1.32351	0.95631	1.02628	0.95379	1.00733	0.962728	0.98242	1.0049	1.02859	1.01036	1.00374	0.990075	1.06017	1.03103	1.00127	1.05315	1.06179	0.980998	1.00561	1.02838	0.997664	0.9959	1.00233	1.02773	1.01809	1.02476	1.01324	1.01343	1.02734	1.03601	1.04725	1.06058	1.02396	1.05087	1.03373	0.993432	1.06072	1.06074	1.05331	1.08561	1.03089	1.04232	0.999241	1.02607	1.02895	1.0259	0.992908	1.01401	0.999788
	1.3234	0.975042	0.973302	1.00211	0.933818	0.913575	1.00484	1.03178	1.02464	1.05083	1.01166	0.994634	1.02089	1.0015	1.01376	1.02406	0.98538	1.04669	1.01703	0.997529	0.986879	1.00039	1.00644	1.03556	0.987193	1.02487	1.02129	1.01003	1.01561	1.02817	1.03128	1.0358	1.0359	1.01491	1.04953	1.03958	1.02248	1.06216	0.998448	0.992264	1.0195	1.01822	1.01896	1.02636	0.978727	1.00413	1.00968	1.01736	1.01412
	1.32329	0.949955	0.954197	0.968396	0.975253	0.890421	1.00093	0.964124	0.997612	0.983122	0.999779	1.00515	1.00891	1.02837	0.981712	1.00447	0.993157	1.05252	0.993968	1.05788	1.07669	1.01586	1.03039	1.0447	1.03841	1.03289	1.061	1.05636	1.01907	0.979341	1.0399	1.02414	1.06582	1.00634	1.00717	1.02014	0.995229	1.00644	1.01283	1.03543	0.987921	1.01374	1.06538	1.01805	1.01494	1.02589	1.00125	1.02084	0.986241
	1.32318	0.932062	0.965203	0.968216	0.968924	0.896975	1.03633	1.01679	0.986376	0.971345	0.991647	1.02869	1.02896	1.02816	1.02144	1.00829	1.03767	1.05274	1.02979	1.06275	1.00561	0.999309	1.05588	0.986672	1.05165	1.03294	0.972179	1.017	1.02717	0.999194	1.06935	0.995286	0.99515	1.02684	1.00305	1.00842	0.980863	1.03417	1.00518	1.02751	1.01565	1.05508	1.03566	1.0111	1.02998	1.01883	0.992659	0.995615	0.965991
	1.32307	0.98978	0.999016	0.986866	0.944425	0.973169	1.01281	0.954454	1.05235	1.0529	0.999465	0.998704	1.02508	1.00431	1.06004	0.999864	1.04737	1.02176	1.0175	1.02491	0.984504	1.01975	1.01856	0.982691	1.03065	1.01207	0.997996	0.993234	1.04021	1.00763	0.990625	1.01181	1.00319	1.0312	1.03075	1.01237	1.04588	1.01869	0.990279	1.00812	1.07945	1.02244	1.01518	1.05264	1.03803	1.01069	1.01055	1.0317	0.978157
	1.32296	0.964122	0.977519	0.981573	0.972361	0.959721	1.01313	0.949756	1.03018	1.025	1.01677	1.02794	1.06043	0.990894	0.98567	1.04736	1.0402	1.02572	1.05959	1.05002	0.957212	1.02404	1.02278	1.054	1.00186	1.03722	1.01724	0.992834	1.0025	1.04941	1.05761	1.0079	1.00313	1.03955	0.987807	1.00463	1.00718	0.991048	1.00522	1.07232	1.0534	1.03062	1.04853	1.01425	1.01134	1.02588	1.03779	1.02391	0.991242
	1.32285	0.959799	0.928923	0.945632	0.914732	0.980396	0.95441	0.927753	1.0215	1.05076	0.987007	1.04982	1.02947	1.00785	1.0257	1.0208	1.02177	1.04074	1.02537	1.04937	1.00188	0.968715	1.02285	1.02817	0.990968	1.01693	1.01343	1.00485	0.933682	1.03285	1.02756	0.991151	1.00325	1.04809	1.0475	1.00459	1.03486	1.02623	0.970543	1.06427	1.0323	0.997728	1.00288	1.02598	0.996084	1.0221	1.04351	0.996789	1.00259
	1.32275	0.913401	0.96181	0.973597	0.940544	0.959445	1.01723	0.997178	1.03025	1.0278	1.00795	1.01116	0.967506	1.03506	1.03853	1.08599	1.00492	1.03836	1.0425	1.04171	1.02648	1.05911	1.0229	1.04114	0.986676	0.99228	1.04572	1.04093	1.0011	1.02034	1.00629	0.986352	1.01116	1.03578	1.01884	0.973517	1.02729	1.01437	1.03724	0.998252	1.06209	1.03913	1.00705	0.99882	0.99577	1.01022	0.984404	0.995453	0.994538
	1.32264	0.935051	0.935664	0.994574	0.953766	0.994007	1.04279	1.03376	0.953289	0.978128	1.04334	1.03193	1.01217	0.959482	1.05224	1.03374	1.00478	0.98621	1.00955	1.02101	0.996725	1.01127	1.03211	0.977764	1.03576	1.04181	1.04229	1.01622	1.00007	1.03381	1.01432	0.994097	1.05129	1.04483	1.02728	1.00853	0.994629	1.02602	1.04212	1.03985	1.00748	1.0396	0.998726	0.959946	1.02804	1.02993	1.01644	0.995169	1.01812
	1.32253	0.925126	0.934236	0.920738	0.956228	0.982004	0.976098	1.0012	1.00527	1.01162	0.978477	1.06273	1.0424	0.982586	1.01731	1.02915	1.00487	1.08498	1.02242	0.957244	1.04579	1.03752	1.00159	1.05651	1.01825	0.99862	0.982112	1.02009	1.01338	1.02042	1.00487	1.0574	0.997528	1.02248	1.0186	1.02129	1.01116	0.988849	1.0305	1.03128	1.04683	1.04484	1.04259	1.01974	1.03298	1.03421	0.980422	1.03593	0.9814
	1.32242	0.937354	0.935707	0.900167	0.918574	1.02405	1.03096	1.02241	1.01315	0.986147	0.999146	1.05399	1.03843	1.03428	1.03976	1.02101	1.03634	1.00227	1.0365	1.02111	1.03262	1.04705	1.00595	1.03832	1.03211	0.984469	1.01662	1.02855	0.989662	1.02516	0.995208	1.02506	0.986344	1.00357	1.02304	1.02195	1.01532	1.01291	1.01298	1.01781	1.0345	1.00822	1.03429	1.01492	1.04606	1.04744	0.970626	0.980032	0.971681
	1.32231	0.933947	0.947806	0.934835	0.95151	0.980924	1.0047	0.996914	0.991683	1.02581	1.03128	1.02616	0.985844	1.04256	1.05426	1.00761	1.02759	1.0323	1.02307	1.04448	1.01406	1.02421	1.01033	1.06674	1.02748	1.05217	1.02546	1.01965	1.00761	1.00612	1.03266	1.04953	0.99065	1.03695	1.01378	0.952081	1.0154	1.0037	0.964971	0.994554	1.02088	1.03627	1.05855	1.0411	1.01185	0.991158	1.00343	0.990874	1.02329
	1.3222	0.901846	0.926841	0.919001	0.930344	0.974977	0.973272	0.992523	1.01761	1.01264	0.985171	1.08423	1.02541	1.01134	1.00735	1.01664	1.02337	1.00628	1.02783	1.07446	1.04255	0.986132	0.964711	1.02465	1.01362	1.00975	1.03486	1.03773	1.03673	0.972168	0.970223	1.00079	0.999361	1.05214	1.02798	1.05624	1.0107	1.00187	1.05562	0.993268	1.07158	1.04665	1.03989	1.01745	1.05389	1.02102	1.00194	1.00832	0.995331
	1.32209	0.900095	0.921634	0.939392	0.902178	0.988034	1.0184	0.978641	1.03155	1.0329	1.01293	0.996199	1.01117	1.02829	1.01643	1.07176	0.99002	1.03914	1.0439	1.01622	0.994378	0.984104	1.02006	0.966553	1.01329	1.0078	0.986837	1.01359	1.02125	1.04743	0.975196	1.04702	1.02968	1.03255	1.01315	0.993627	1.02045	0.995555	0.993077	1.00504	1.05758	1.05295	1.03148	1.00182	1.07694	0.981865	1.02498	1.03789	1.04943
	1.32199	0.932667	0.959779	0.934855	0.940672	1.01142	0.972182	1.0443	1.04129	1.03814	0.99858	0.953144	1.08194	0.998691	1.02138	1.03143	1.02937	1.04973	0.999306	0.981272	1.01919	0.998693	0.995057	1.02	0.997581	1.03343	1.01042	1.09492	0.974203	1.00458	1.0777	0.978407	1.04076	1.00054	1.02322	0.964246	1.02069	1.02018	1.08129	1.00978	1.01637	0.95735	1.01073	1.01498	1.02711	1.00541	1.06619	1.00274	1.01411
	1.32188	0.911399	0.895168	0.926314	0.919498	1.00158	0.97478	1.00612	0.988571	1.04483	0.983209	1.05549	0.976304	1.02489	0.990369	1.04785	1.04567	0.9816	0.988476	0.995454	1.01427	1.06288	0.973799	1.02001	1.06725	1.03347	1.04634	1.00734	1.01466	1.03748	1.08544	1.00925	1.08847	0.98362	0.98557	1.01328	1.04793	0.993621	1.04576	1.0926	0.97756	1.04405	1.06182	1.03005	1.01768	1.02	1.02338	0.971773	1.01936
	1.32177	0.952256	0.961751	0.883828	0.930045	1.03277	0.998902	1.02172	0.987314	1.02538	0.956222	1.00181	1.04753	0.979682	0.98874	1.04821	0.993712	1.03798	1.02537	1.0434	1.01996	1.03574	0.982562	0.997482	1.00131	0.978543	0.99377	0.968434	0.972584	0.986667	1.00496	1.03223	0.97817	1.02738	1.05668	1.00269	1.03172	0.951385	1.01848	1.02446	1.07394	0.993392	1.02164	1.05708	1.01272	1.02518	1.0431	1.02195	0.976941
	1.32166	1.04034	0.921043	0.924222	0.959836	1.00623	1.00395	0.964298	0.976148	1.0495	0.99169	1.01615	0.981611	1.02604	1.0377	1.03364	1.02088	0.989715	1.02002	0.993108	0.991053	0.994951	1.01539	0.96758	0.994315	0.98788	0.992785	1.02748	1.07392	0.979187	1.05216	1.00901	0.976855	1.03958	1.01748	1.02489	1.01583	1.01897	1.00764	1.00681	0.993337	1.03285	1.05189	1.01277	1.02934	0.987538	1.0474	1.0052	0.971851
	1.32155	0.963914	0.943807	0.972634	0.985309	0.957059	0.972164	0.958805	1.00702	1.02752	1.04321	1.04517	1.02634	0.997094	1.01508	1.0398	1.0502	1.01666	0.975835	1.03355	0.973613	1.07439	1.00957	0.968186	1.01758	1.01025	1.00255	1.04522	0.994433	0.996318	1.0098	0.954601	0.999241	1.01501	1.00041	0.99009	1.03322	0.971694	1.03603	1.04175	1.01664	1.01495	1.04058	1.03468	1.0297	1.0249	1.0211	1.07505	1.04868
	1.32144	0.938687	0.964229	0.962636	0.927196	1.00633	1.02033	1.0518	1.00696	1.04527	1.032	1.03909	1.03812	1.04604	0.964848	1.00555	1.01557	0.989116	1.03782	1.05702	1.04414	1.00103	1.05664	1.03796	1.00054	1.00975	0.990805	1.00001	0.989248	1.03333	0.944998	0.990661	0.994258	1.0275	0.999514	1.01361	1.02179	1.06638	1.04226	1.00668	0.971265	1.06325	0.986965	1.1014	0.996174	1.05906	1.02169	1.05746	1.08404
	1.32133	0.943017	1.00159	0.916031	0.978978	0.99514	0.986899	0.995618	1.04668	1.0233	1.02599	1.05132	1.05795	1.02174	1.04474	1.03441	1.05776	0.966699	1.00256	1.0157	0.967339	1.01206	0.99738	1.01397	0.999099	0.991381	1.02581	1.00337	1.05126	0.996097	1.05349	1.04562	0.98801	1.04705	1.06666	1.05644	1.05191	1.01247	1.00146	1.01784	1.06044	0.995918	1.02878	1.0123	1.03688	1.03635	0.989899	0.986221	1.00821
	1.32123	0.990562	1.01266	0.905176	0.957514	0.989506	1.02663	1.00674	1.04103	0.987778	1.02688	1.03881	0.991433	1.04251	1.02669	1.02286	1.03996	0.977108	1.00867	1.02792	0.978978	0.999816	0.985473	1.03876	1.02994	1.02759	0.995859	1.01583	1.07808	1.04706	0.948733	1.05856	0.986919	1.04685	1.01099	1.0502	1.02794	1.01247	1.01319	1.0001	1.01684	1.04587	1.02869	1.04651	0.996101	0.990183	1.05643	1.01475	1.033
	1.32112	0.979377	1.00141	0.999405	1.00194	0.989334	1.03793	1.0069	1.02978	1.02268	1.05087	0.998052	0.997116	1.04161	0.967743	1.06537	1.01583	1.0228	1.02071	1.05234	0.984068	0.963908	0.980139	1.09024	1.02997	1.06569	0.989472	0.998471	1.02561	1.03444	0.958527	1.04081	0.973112	1.00225	1.06866	1.02004	1.0349	0.987812	1.00703	1.01088	0.985517	1.04662	1.04242	0.997918	1.05568	0.989546	1.00982	0.959749	1.03994
	1.32101	1.05498	0.990131	1.03473	1.0134	0.965889	0.986344	0.961129	1.04703	1.02355	1.03328	1.0132	1.02686	1.0279	1.05186	1.01697	1.02214	1.01731	1.08774	1.04133	1.03484	1.0182	0.977763	0.982108	0.991649	1.03383	1.03239	1.04004	0.966394	1.02096	1.00169	1.02084	0.997734	0.99473	1.07823	1.02737	1.04905	0.9916	1.0196	1.0425	0.990725	1.02716	1.04447	1.04018	1.04591	1.01232	1.04281	0.982663	0.989061
	1.3209	1.02536	1.04286	0.949804	0.990283	1.00639	0.992006	0.938243	0.949673	1.07639	0.978216	1.01996	1.01444	1.01161	0.985333	0.992791	1.01623	1.03678	1.04087	1.05503	1.01473	0.961731	0.996015	0.987232	0.98454	1.02716	0.937309	1.02749	1.02485	1.01381	0.978803	1.01369	0.974919	0.985475	1.02369	1.00739	0.978932	0.991358	1.00025	1.09642	1.05615	1.09096	1.0363	1.00727	1.07547	0.974667	0.976103	1.00744	1.02068
	1.32079	0.989941	1.04225	0.954375	1.01363	0.976383	1.01524	0.995213	1.03584	0.993293	0.995986	1.02551	1.01419	0.976136	0.99564	1.0232	1.04852	1.07167	0.988896	0.988941	1.02183	0.989767	0.944828	1.00682	0.984102	0.992286	1.01242	0.919717	1.03221	0.964706	0.985943	0.999036	1.02476	0.971436	1.02373	1.00748	1.00322	0.978724	1.00681	1.02913	1.00389	1.05464	1.0446	1.03344	0.99465	0.992775	0.988873	1.05553	1.02095
	1.32069	0.984089	0.995058	0.993543	1.0199	0.987408	0.997274	0.989109	0.987766	0.986509	1.00208	1.03132	1.04635	0.96567	1.06729	1.01707	1.01658	1.05163	1.01499	1.00166	1.02903	1.04614	1.03071	1.04142	1.00228	0.91908	0.999052	0.967669	0.983746	0.992911	0.978897	1.07312	1.01005	0.992105	1.03743	0.994683	1.06424	0.94547	1.04661	0.996081	1.04466	1.04098	1.00998	1.06073	0.988509	1.04424	1.02282	0.977662	0.993116
	1.32058	1.02081	0.970278	0.987076	0.970375	1.05219	0.943298	0.983076	1.05094	0.980868	1.00849	1.02499	1.00113	0.988942	1.02708	1.0171	1.0165	1.02437	0.96267	0.969263	1.00803	1.02468	1.01617	0.986624	0.990461	1.02712	1.04583	1.00732	0.969076	1.00684	1.00746	0.986729	1.04695	0.999674	1.07225	1.04924	1.00292	1.02332	1.06028	1.00756	0.989554	1.06325	1.0239	1.04037	1.00739	0.992654	1.04264	1.0051	1.04414
	1.32047	0.983573	0.994995	0.982058	1.02031	0.999589	1.04136	1.03895	0.981966	0.993438	1.00197	1.05818	1.00086	1.02875	1.05418	0.997568	0.984503	1.02434	0.995608	1.03517	0.981769	0.991217	1.01625	0.973214	0.991814	0.973623	0.956025	1.00772	1.00441	0.973817	0.960073	0.993246	1.03193	1.00661	1.00994	0.979375	1.02374	1.03024	1.02701	1.04342	1.06185	1.07986	1.12002	1.03335	1.04879	1.01118	1.01068	1.05874	0.984048
	1.32036	0.995991	1.00713	1.01131	0.978085	0.988542	1.00944	1.00117	1.00649	0.999682	1.02819	0.979682	1.03331	0.977808	1.00819	0.986148	1.05634	0.999094	0.989335	1.02875	1.01499	1.01786	0.983326	1.03372	0.97834	1.0341	0.993492	1.00761	1.02508	1.05874	0.978693	0.963135	0.989553	1.04239	1.00213	1.04384	1.03211	0.986398	1.0346	0.983815	0.987222	1.03519	1.00918	1.04721	1.00039	1.0312	1.04829	1.00453	0.991391
	1.32025	1.0254	1.03694	1.02332	1.0264	0.988906	1.03916	0.976747	1.01269	1.01237	1.06131	0.992439	0.975814	1.03569	1.02728	0.997753	1.04903	1.03173	1.002	1.05766	1.04324	1.0387	1.00949	1.06333	1.00375	0.973312	0.974253	0.981821	0.98876	1.02874	0.97874	0.984638	1.03989	1.01317	1.00901	0.991107	1.03972	0.955039	1.00607	0.997351	1.01743	1.05116	1.00907	0.961808	1.09133	1.07643	0.984275	1.0696	0.960316
	1.32014	1.00773	1.03098	1.03621	0.977579	1.0437	1.0462	0.982509	0.970228	0.986769	0.995151	0.979055	0.987737	0.982354	1.01426	1.01053	0.977209	1.05986	1.01534	1.02923	1.03669	0.988707	0.995735	1.0415	0.947795	1.03419	0.978361	0.946367	0.951874	0.983726	1.014	0.990889	0.994589	0.941734	0.979162	1.04606	1.01685	1.02231	1.00609	0.997939	1.03378	1.01143	0.969655	1.0398	1.0223	1.01659	1.01269	0.995206	1.02208
	1.32004	1.0017	1.05689	1.04958	0.948484	0.975843	0.936982	0.994745	1.03744	0.98697	0.942703	1.01693	0.993924	0.993612	1.0074	1.02399	1.02356	0.991494	1.02992	0.975506	0.986344	0.989962	1.02362	0.98433	0.916686	0.94151	1.02629	0.957945	1.03245	0.941065	1.02885	0.969384	0.973373	0.970928	0.985265	0.99883	1.01693	1.00647	1.01339	1.06052	0.9939	1.10524	1.03369	1.0553	1.02197	0.946027	0.970952	1.05225	1.00611
	1.31993	0.964609	1.03265	1.03328	1.0014	0.986841	1.10377	0.988074	1.01886	1.05537	0.995023	1.01625	1.00708	0.987719	1.04146	1.03103	1.04469	1.07289	1.01548	1.06614	1.01519	0.948159	1.01664	0.997927	0.996146	1.03428	1.04099	1.01311	0.935924	1.07077	0.959792	0.9898	1.00137	1.01986	1.00858	1.04529	1.08007	0.940655	1.05151	1.02828	1.02523	0.97224	1.00908	1.03227	1.03699	1.01649	1.06622	1.02695	1.04529
	1.31982	1.01472	0.994648	0.981476	1.01447	0.936607	1.0295	1.02066	1.03851	1.00675	1.0885	1.02298	0.992443	1.01183	1.02754	1.02419	0.989321	0.969667	1.0686	0.992532	1.04578	1.05524	0.987028	0.976557	0.972707	1.01167	0.983607	0.991618	1.0247	1.00555	0.989371	1.06876	0.963398	1.00458	1.0092	0.991786	1.01707	1.04585	0.99885	1.02836	1.04174	1.02761	1.11403	0.989854	1.04495	0.996178	0.990521	1.00271	0.91856
	1.31971	1.01465	1.03282	1.03338	1.04053	0.981878	1.02993	0.968441	0.99318	0.979489	0.981628	0.980804	0.986597	0.999285	0.978002	0.964494	0.937297	1.0331	1.06076	1.00793	1.00037	1.05527	0.964456	1.01274	0.94648	0.974837	0.94908	0.983124	1.01748	0.985207	1.00613	0.942185	1.03303	1.01293	0.979339	1.05309	1.01715	1.00801	0.956754	0.990734	1.02547	1.05119	1.00939	1.01823	1.02206	1.0033	1.002	0.988617	1.00646
	1.3196	0.976369	0.994501	1.05308	1.00148	1.0263	0.946528	1.03475	1.04533	0.960717	1.02255	1.06511	1.00639	1.03733	1.01397	1.01737	0.989562	1.04682	1.00159	1.06793	1.00799	0.981628	0.974499	1.01297	1.0321	0.983778	0.94266	0.999824	0.980593	0.984723	0.992029	0.991518	1.00217	1.05158	1.0094	1.04577	1.03999	0.972202	1.05046	1.05171	1.00275	0.996314	1.03318	1.01852	0.97994	1.04626	1.00865	1.0792	1.01409
	1.3195	1.01418	1.00096	0.981958	0.995466	0.96477	1.05275	1.02683	1.01288	1.06161	0.995312	1.00225	1.02035	1.02409	1.03446	1.00411	0.964585	1.05328	1.00185	1.0578	1.00849	1.07585	1.03127	0.925727	0.969884	0.978542	0.972819	0.981201	1.01788	1.04324	0.958122	0.958415	0.981529	0.992296	0.941794	1.0224	0.968849	1.08213	0.999605	1.0287	0.996238	1.0354	0.987648	1.02724	0.959378	0.99797	0.992858	1.02515	1.02103
	1.31939	0.989375	0.994971	0.964682	1.00155	0.97014	1.02885	0.994858	0.982538	1.03356	0.988879	1.09903	0.975419	1.00002	1.06812	1.01104	1.00374	0.992307	1.03671	1.02985	0.94684	0.989403	0.93061	1.02034	0.989644	0.984215	0.953681	0.940599	0.936921	0.993364	0.993899	0.980284	0.990315	0.987431	1.07519	1.00813	0.957126	1.01632	1.04127	0.995001	1.03902	1.04996	1.06978	1.00718	1.01401	0.991548	1.02113	1.06555	1.0552
	1.31928	1.02532	1.05898	1.05319	0.989753	1.01348	1.00363	1.03244	1.09245	1.04609	1.01533	1.05597	1.04683	1.00613	1.01495	1.00459	1.05685	1.01856	1.03609	1.00298	0.988602	1.01837	0.952729	0.979541	1.01823	0.962064	0.932102	0.96268	1.02586	0.955675	0.925627	0.969072	0.985531	1.0773	1.03112	0.988372	1.03074	0.964204	1.02669	1.00979	0.991413	1.04837	1.03123	1.0481	1.00734	1.01258	1.00282	1.02435	0.989046
	1.31917	0.978593	1.05459	1.03623	1.00205	1.02528	1.07093	0.995297	1.06174	1.00007	1.02161	0.972971	0.988819	1.00103	1.02156	1.00509	1.00419	1.05007	1.02221	1.02913	1.03496	1.01852	0.959604	1.00075	1.01233	1.00206	0.897516	0.960864	0.958968	0.926032	0.926319	0.942448	0.981489	0.966424	0.994117	1.009	0.968177	0.986539	1.05228	0.998305	1.01177	0.983985	1.04487	0.999993	1.06876	1.00239	0.999471	1.01137	1.01408
	1.31906	0.945483	1.01891	1.00034	1.04304	1.00206	1.02717	1.02416	1.01933	1.03626	0.997208	1.02338	1.00815	1.04869	1.06472	0.987949	0.940607	1.02367	1.00443	1.01086	1.03363	0.977401	0.909281	0.972082	0.995241	0.9805	0.951671	0.942337	0.939937	0.928252	0.910983	0.951483	0.976459	0.945191	0.988941	1.02774	0.963393	0.988073	1.03084	1.02996	1.0369	1.04067	1.06882	1.03061	1.01852	0.998994	0.996754	1.04295	0.973978
	1.31896	0.98034	1.02389	0.979104	0.996823	1.02486	0.983216	1.00642	1.01939	1.00014	1.05399	1.00246	0.987718	1.03129	1.03366	1.06872	1.05119	0.976066	0.9888	0.958546	0.955913	0.968472	0.936595	0.997596	0.986075	0.94259	0.905594	0.959825	0.95292	0.964939	0.983846	0.964816	0.99036	1.00495	0.956968	1.00378	1.07717	0.957061	0.997493	1.03626	1.04191	1.00431	1.05447	0.965597	1.00732	1.04811	1.02501	0.999595	1.02581
	1.31885	0.996664	1.03884	0.985653	1.00269	1.01381	1.02576	1.04119	0.993446	1.0321	0.998305	1.04107	1.00969	0.967253	1.06095	0.977684	0.984761	1.01733	1.02145	1.02286	0.999501	0.957143	0.944369	0.957618	0.967824	1.0075	0.934325	0.936634	0.955516	0.964976	0.974048	0.971365	0.951703	0.978191	0.976032	1.0156	1.00048	1.01861	1.0136	1.03046	1.01829	1.02214	0.98245	1.01652	1.00213	1.00638	1.01303	1.02866	0.991794
	1.31874	1.00178	1.03626	1.01964	0.997996	1.00414	1.02427	1.02545	1.01951	1.06523	1.07201	0.990784	1.01525	0.994756	1.06934	1.05288	1.05776	1.00253	1.01122	1.00741	0.995745	0.999408	0.942308	0.964583	0.960419	0.942565	0.962905	0.951227	0.978515	0.962622	0.943205	0.935614	0.941675	0.97982	0.951424	0.923811	1.01256	0.9522	0.993448	1.03082	1.05731	1.02243	1.0628	1.01739	0.992573	0.983654	1.05791	1.05981	1.05746
	1.31863	1.01952	0.984931	1.05664	0.989778	0.964837	1.01446	1.00565	0.996914	1.00488	1.01854	1.02114	1.00143	1.02916	1.0188	0.976208	0.996871	1.01709	0.988225	1.00339	0.985935	0.951616	0.97002	0.952734	0.952272	0.954854	0.960258	0.906834	0.920971	0.955065	0.917271	0.979984	0.974396	0.948692	0.988794	0.980213	0.987791	0.975237	1.05925	0.986012	1.039	1.02287	1.00739	1.04354	1.04137	1.00376	0.995029	1.03767	1.02976
	1.31852	1.01018	1.03748	1.01784	0.991012	1.00065	1.0312	1.01443	0.985212	0.986767	1.01826	0.998339	1.02022	1.00404	1.03299	1.02698	0.992663	1.03065	1.0164	1.03262	0.982788	0.97776	0.947303	0.982485	0.918378	0.978157	0.923265	0.932512	0.913185	0.938738	0.942464	0.922044	0.979981	0.9782	0.960966	1.00584	0.954327	1.02525	0.990192	1.0054	1.03377	1.03859	0.982495	1.03428	1.0119	1.02285	0.985728	1.02162	1.02378
	1.31842	0.993787	1.0113	1.06734	1.05555	1.02245	1.02244	1.00535	0.988315	1.01795	1.01342	1.02173	1.02462	1.01997	1.01533	1.00882	1.00218	1.01246	0.988995	1.02307	0.950672	0.956289	0.931401	0.956116	0.93587	0.912887	0.916234	0.941891	0.958489	0.904165	0.936877	0.927978	0.941663	0.927721	0.968082	1.00121	0.975407	1.00595	1.07673	1.01203	1.02854	1.03321	1.04321	1.0034	1.02529	1.01922	1.00096	1.00668	0.989701
	1.31831	1.02953	0.991614	0.985048	1.03198	0.982893	1.02202	0.993257	0.999754	1.00036	1.00065	1.01311	1.00347	1.01215	1.00328	1.07357	0.977636	1.01251	0.998625	0.991152	1.01597	0.993098	0.981615	1.00644	0.962768	0.935524	0.944254	0.92786	0.959581	0.946235	0.908505	0.974054	0.939652	0.990606	0.963963	0.982935	0.94868	1.00163	1.02727	1.03158	0.99033	1.04825	1.01323	1.00906	1.04311	1.00611	1.03496	1.02101	1.01888
	1.3182	1.0408	1.02285	1.01625	1.02412	1.0143	1.01775	1.02479	0.989367	1.06266	1.03915	1.02217	1.01593	1.04667	1.01188	0.997419	0.998626	1.03841	1.00341	0.969561	0.993638	0.967358	0.956192	0.962567	0.939986	0.910968	0.920591	0.89865	0.871639	0.916567	0.913732	0.924301	0.93315	0.938507	0.95098	0.988132	0.999656	1.035	1.01371	1.00801	1.01869	1.0234	1.03745	1.0312	1.02473	0.998284	1.00032	0.979157	1.00006
	1.31809	1.017	1.02216	1.00442	1.01933	0.981188	0.987476	1.00875	1.01231	1.04462	1.03373	0.983218	1.02016	1.06822	0.993671	1.05852	0.983617	1.00441	0.958104	0.945843	0.972832	0.972075	0.954071	0.951908	0.944348	0.899852	0.917124	0.895677	0.885504	0.943395	0.936968	0.94823	0.925295	0.933615	0.95451	0.956134	0.981713	0.970194	0.991789	1.02216	1.03324	1.07276	1.06248	1.00694	1.029	1.05839	1.02228	0.997542	1.00942
	1.31799	1.0278	1.02597	0.989752	0.989284	1.01821	1.00637	0.993493	0.962059	1.02039	1.00519	1.00203	1.04039	1.04124	0.990144	1.01001	1.02739	0.992402	0.982428	0.976187	0.968149	1.00754	0.962663	0.951631	0.916206	0.88174	0.81469	0.844273	0.870974	0.90949	0.926808	0.905383	0.925768	0.924588	0.937334	0.961083	0.97265	0.971253	0.992181	1.02702	1.03769	1.03792	1.03731	1.06261	1.02421	0.986551	0.98863	1.04333	1.00061
	1.31788	1.00183	1.02537	1.04536	0.989838	0.967946	1.00279	1.04752	1.03095	0.992557	1.05322	1.01474	1.02413	1.00521	1.02103	1.02174	0.96928	1.00463	0.948224	0.973214	0.956397	1.00349	0.950241	0.952788	0.909271	0.885474	0.896146	0.852989	0.850837	0.842475	0.874063	0.880257	0.94983	0.954125	0.942462	0.901953	0.996055	0.963644	0.943138	1.04113	0.996248	1.04722	0.99551	1.01102	1.02414	1.00425	1.02278	1.01999	1.02313
	1.31777	1.01636	1.01435	1.01855	1.05252	0.986252	1.01362	1.02389	1.04175	1.00851	1.04538	1.0067	1.00821	1.01586	1.00515	1.01407	1.01921	0.969236	0.967883	0.947894	0.985824	0.977832	0.947254	0.94076	0.918121	0.862647	0.850714	0.844069	0.873244	0.886718	0.808	0.936829	0.920824	0.949767	0.955828	0.946931	0.940118	1.00361	1.01801	1.01395	0.992259	1.00986	1.03242	1.03268	0.987208	1.02468	1.01447	1.0198	1.01407
	1.31766	0.98112	0.989773	0.997467	1.02216	1.04073	1.01715	1.01607	1.00937	1.03259	0.97482	1.01416	1.05161	0.998553	1.00626	1.00274	1.04321	0.989339	0.984418	0.971267	0.939954	0.941055	0.895921	0.887623	0.851199	0.827407	0.841445	0.837795	0.873274	0.846079	0.844967	0.86221	0.905537	0.897774	0.957019	0.922154	1.00105	0.983233	0.977599	1.06778	1.00601	1.00646	1.00106	0.975576	1.0271	1.03667	1.00136	1.04964	0.95982
	1.31756	0.995063	0.990478	1.03199	1.01865	0.952457	0.999652	0.983504	1.00633	1.03851	1.03263	1.02257	0.993932	1.00901	0.966015	1.00304	0.977815	1.00506	1.01303	0.968596	0.963265	0.924946	0.920431	0.928892	0.836936	0.83135	0.83507	0.828533	0.847699	0.861028	0.83557	0.841953	0.86443	0.940436	0.943438	0.964906	0.927141	0.92766	0.978596	0.959429	1.00597	0.972057	1.04098	1.04558	1.02253	1.02527	1.02971	1.01086	1.01823
	1.31745	0.998533	1.01396	1.03193	1.01152	1.01488	1.01697	1.00796	1.00361	1.03826	1.03188	0.979314	0.998369	1.01232	1.00703	0.996483	1.01517	0.968376	0.966635	0.939839	0.951589	0.919017	0.900183	0.875888	0.859927	0.801407	0.862743	0.830024	0.890354	0.859337	0.842393	0.838131	0.858976	0.870725	0.90503	0.918687	0.965282	0.971626	1.01384	0.935322	1.02768	1.01987	0.9772	1.00462	1.01833	1.02914	1.02478	0.978915	1.01407
	1.31734	1.02151	1.01056	1.06453	1.00136	1.0218	0.990253	1.01494	1.00729	1.00067	1.02362	1.01269	0.978423	1.01557	1.00448	1.02502	1.0115	0.979797	0.945327	0.992932	0.926859	0.913734	0.868725	0.883517	0.815224	0.845033	0.867882	0.839162	0.866412	0.853214	0.841703	0.769484	0.839291	0.887834	0.901414	0.93949	0.96702	0.974136	0.96206	1.00013	0.994663	1.0121	1.01461	1.0126	1.04349	0.997646	1.00968	0.954346	1.00621
	1.31723	1.00187	1.02647	1.00429	1.04106	0.970077	1.03955	1.02441	1.01395	0.983863	0.988379	0.998606	0.975395	1.00924	0.988908	0.997691	0.997648	0.980895	0.964497	0.959911	0.936832	0.906664	0.851194	0.82157	0.846031	0.847146	0.896256	0.850628	0.857229	0.894532	0.873199	0.851161	0.836757	0.865579	0.892716	0.930474	0.929045	0.914932	0.995646	1.0122	1.01538	1.03676	1.01478	0.995292	1.01072	1.00495	1.02069	1.02242	1.01018
	1.31713	1.00835	1.0296	1.02618	1.00156	0.995671	0.985828	1.02108	1.0204	0.993868	1.0383	1.02317	1.00297	1.00638	1.03946	1.008	1.03913	0.974883	0.949729	0.971781	0.900055	0.884262	0.855392	0.822871	0.802355	0.854597	0.872108	0.878052	0.894153	0.915148	0.897623	0.826639	0.853008	0.824077	0.862845	0.888397	0.919225	0.938682	0.959095	1.02072	1.01543	0.992891	1.05876	1.03573	1.01064	0.996246	1.0087	1.03758	1.02184
	1.31702	1.01721	1.04159	0.99528	1.03916	0.997084	1.0194	1.01042	1.00528	1.01072	0.996151	1.0367	1.02331	1.01828	0.977317	0.995417	1.03845	0.969047	0.919363	0.931315	0.920613	0.924865	0.850074	0.805073	0.824703	0.883213	0.908615	0.882012	0.920637	0.92016	0.883057	0.887181	0.824381	0.814788	0.823817	0.884839	0.90536	0.896644	0.933343	0.939783	1.01569	0.975534	1.01887	1.01928	1.04005	0.97551	1.00562	1.00346	1.02497
	1.31691	0.987204	1.03086	1.01874	0.999363	0.988733	1.02823	1.00112	0.988632	0.997649	1.03214	1.03979	1.02965	0.981924	0.994171	0.968629	0.93699	0.945601	0.946938	0.907093	0.912187	0.881998	0.859734	0.809271	0.844214	0.966729	0.942092	0.923683	0.952627	0.949408	0.916596	0.880222	0.866733	0.8559	0.85509	0.854952	0.888493	0.936273	0.956862	0.972799	0.954183	1.01711	1.05547	1.01956	1.02353	1.00065	0.999781	1.02531	1.04055
	1.3168	0.973519	1.02186	1.0042	0.982681	0.972354	0.992956	1.00715	1.01765	1.0039	1.03146	1.01402	1.01689	0.998702	0.978232	0.978545	1.01805	0.938601	0.917387	0.918856	0.889602	0.854738	0.793191	0.82951	0.878755	0.904078	0.934363	0.945853	0.960925	0.946226	0.947073	0.918376	0.89106	0.802496	0.822456	0.842182	0.909041	0.919878	0.964735	0.989385	0.948257	0.976385	1.01527	0.992151	1.0299	1.00823	1.03149	0.981002	1.01043
	1.3167	1.03568	0.993469	1.00697	1.00818	0.990004	1.02724	1.02554	0.998272	1.03807	1.04663	1.06483	1.01686	0.998798	1.01135	0.976403	1.03379	0.9463	0.947854	0.964467	0.921844	0.825815	0.798826	0.889755	0.893092	0.937746	0.969251	0.980963	0.980455	0.939329	0.973922	0.932578	0.906937	0.839988	0.846834	0.82207	0.895085	0.924981	0.960957	0.948382	1.01962	0.976758	1.03106	0.987865	1.00723	0.98286	1.02351	0.965202	0.964503
	1.31659	1.00191	1.04462	1.00147	1.03144	1.01554	1.0132	1.03379	1.03488	0.985571	0.991578	1.02337	1.00147	1.0125	1.04786	0.960052	0.960957	0.981723	0.949822	0.918951	0.846791	0.793199	0.804172	0.874444	0.920738	0.962377	0.973328	0.955575	1.00457	1.00845	0.981529	0.939801	0.912024	0.888843	0.799212	0.843378	0.864161	0.917872	0.943484	0.933804	0.958353	1.0051	0.992418	1.01004	1.01051	1.00789	1.01358	1.01734	1.02198
	1.31648	1.02656	1.02343	1.01808	1.0253	0.993305	0.991341	1.02762	0.990899	1.01295	0.997543	0.998865	0.998627	1.00701	1.02365	0.982952	0.970231	0.947456	0.91726	0.915717	0.889318	0.855379	0.874459	0.870438	0.941466	0.9597	0.959299	0.944478	0.974055	1.02998	0.998166	0.945949	0.957172	0.906606	0.824697	0.851011	0.828439	0.935919	0.937546	0.967362	0.993019	1.00139	0.976896	1.00691	1.00401	1.02706	1.0313	0.998451	1.01406
	1.31637	1.04734	1.00455	1.04659	1.0225	0.993508	1.03289	1.00688	1.0044	1.0221	1.00955	0.995876	0.986633	1.00389	0.965312	0.946789	0.970156	0.952068	0.924062	0.925741	0.864186	0.832002	0.88466	0.88818	0.977108	0.936353	0.983651	0.992355	1.00402	1.02994	0.980435	0.965095	0.924878	0.967396	0.819818	0.814749	0.843265	0.888418	0.930914	0.966334	0.972202	1.02892	1.00746	1.02085	1.06627	0.998468	1.03356	1.01683	1.00312
	1.31627	1.01901	1.01009	1.02132	0.98253	1.02737	1.03958	1.02524	1.00414	0.991902	1.04123	0.99508	0.989282	1.00978	1.01118	0.976274	1.00274	0.923922	0.923817	0.907755	0.855471	0.862785	0.891054	0.958397	0.955466	0.986946	0.982349	0.981512	1.00127	1.01206	1.01281	0.945497	0.965972	0.969354	0.908558	0.855536	0.80894	0.897696	0.934517	0.952919	1.0005	0.978863	0.999808	1.00388	1.01683	1.02385	1.01868	1.0421	1.01406
	1.31616	1.0361	1.04129	1.01551	0.988535	0.965502	1.00766	1.03408	1.00695	1.00415	1.0283	1.00144	1.03256	0.998908	0.978309	1.00307	0.984276	0.951964	0.919437	0.908553	0.81161	0.877423	0.921974	0.932999	0.97913	0.99337	0.967803	0.993762	0.957153	0.979801	0.972031	0.943652	0.996837	0.959502	0.903613	0.871778	0.803817	0.867021	0.943554	0.967932	0.982593	1.029	1.05846	0.984378	1.0398	1.01137	1.00073	1.05846	0.992482
	1.31605	1.0432	1.04227	1.00462	0.999495	1.00414	1.01635	0.986168	0.989802	1.01655	0.997359	1.03212	1.02621	0.985098	1.01148	0.991112	0.971736	0.934599	0.91156	0.871764	0.856462	0.910391	0.920993	0.962084	0.997534	0.960785	0.971002	0.985425	1.03376	0.967467	0.978799	0.981297	0.997282	0.951742	0.932203	0.892777	0.81012	0.851402	0.918294	0.933846	0.953737	0.962175	1.0012	0.97387	1.06933	1.04973	1.04564	1.03477	1.0213
	1.31594	1.04629	0.98972	1.03723	1.01435	0.986591	1.00183	1.00986	0.978037	1.03204	1.00345	1.03514	1.01987	0.987391	1.01176	0.94973	0.971659	0.93045	0.906067	0.85023	0.826607	0.943844	0.930148	0.962097	0.97525	0.978388	0.973073	0.968485	1.02306	0.990716	1.00559	1.0155	0.979411	0.959099	0.963854	0.929186	0.846287	0.84952	0.900344	0.946205	0.937764	0.982145	1.00146	1.00204	1.01667	1.00617	0.999867	1.0311	1.01774
	1.31584	1.01627	0.965256	1.03061	1.01724	0.984639	0.993629	0.992248	1.00132	1.03613	0.957197	0.991438	1.00426	0.995495	1.03965	0.970384	0.955961	0.912919	0.897191	0.828912	0.852303	0.927101	0.986388	0.954096	1.0073	0.987271	0.999901	0.987255	1.04101	0.988157	1.0032	1.01557	1.00434	0.976035	1.00514	0.942927	0.838795	0.878323	0.926923	0.931354	0.95043	0.947685	0.989831	0.97653	1.00409	0.986895	1.01294	1.03466	0.996326
	1.31573	0.999161	1.0188	1.01026	0.996942	1.04778	1.03586	0.998117	0.993728	1.01963	1.03794	1.03805	1.01669	1.03563	1.00848	0.976546	0.984384	0.930012	0.891807	0.844621	0.900243	0.907853	0.958562	0.98484	1.00497	1.02619	0.979659	0.997386	1.00222	1.01589	0.951278	0.9721	1.01926	1.00576	0.959721	0.934913	0.860825	0.810763	0.895399	0.949564	0.979851	0.97423	0.975652	0.986105	1.02881	0.979873	1.02228	1.02638	0.982905
	1.31562	1.00197	1.04373	1.04088	0.994654	1.03611	1.02446	0.998219	1.00507	1.04057	1.00974	0.998674	1.03792	1.00991	0.995212	0.959126	0.958701	0.926124	0.84805	0.861471	0.872403	0.935379	0.987988	0.952581	0.98656	1.0108	0.968852	0.998556	1.01025	1.01635	1.00375	1.01268	1.04726	1.00982	0.989433	0.942685	0.873248	0.857359	0.859353	0.949583	0.944037	0.981253	0.979528	0.955274	1.01642	0.997911	1.01802	1.03269	0.973625
	1.31552	1.00198	1.03466	0.996622	0.980855	1.01361	1.03256	1.01861	1.00258	0.986289	1.01881	1.04382	0.969261	1.01003	0.98186	0.955066	0.940672	0.937209	0.839215	0.842948	0.895358	1.00006	0.963697	1.01155	0.999799	1.01497	0.996383	0.992864	1.01346	1.03994	1.02079	1.03307	1.01262	1.00905	0.957384	0.947848	0.951773	0.839481	0.848281	0.882923	0.950466	0.951169	0.981117	0.98436	1.01924	0.995309	1.04295	1.01504	1.03748
	1.31541	1.02929	1.01817	1.00202	1.02239	1.00028	0.987047	1.0011	1.00259	1.00131	1.01581	1.01012	1.01376	0.997006	1.00581	0.958322	0.93903	0.901853	0.851789	0.842628	0.912114	0.981589	0.986323	0.975967	1.02474	1.0089	1.01087	0.99401	1.00366	0.99966	0.979103	1.00978	1.0431	0.999931	0.988624	0.992569	0.889528	0.855381	0.833832	0.910169	0.936194	0.947601	0.950778	1.00712	1.01281	1.00857	0.989242	1.01155	1.02995
	1.3153	0.999286	1.01814	0.991232	1.00286	1.00005	0.994699	1.03302	1.00299	1.01306	0.986273	0.991954	1.01369	1.02068	0.995405	0.960895	0.944353	0.888633	0.827933	0.824613	0.969719	0.97355	0.98122	1.02396	1.00686	0.974391	1.02226	0.977743	0.992648	1.01352	0.99342	1.01661	0.99434	0.988803	1.02609	0.971779	0.956784	0.881737	0.817089	0.897621	0.923297	0.986166	1.00681	0.994546	0.990656	1.02278	0.98606	1.00278	0.985565
	1.31519	1.02111	1.03181	1.02913	1.03876	1.00584	1.00262	1.03992	1.00828	1.02401	1.02707	1.0369	0.996973	1.02058	0.963561	0.968541	0.901836	0.87738	0.828528	0.868411	0.919856	0.99022	0.976601	0.968697	1.0222	1.00441	1.01434	1.01479	1.02789	0.987271	1.00321	0.986715	1.005	0.986352	0.999216	1.00645	0.948835	0.8955	0.810817	0.923468	0.937305	0.936357	0.9618	0.979523	1.01267	1.02597	0.999179	1.03244	1.02973
	1.31509	1.02272	0.994694	1.04071	0.990737	1.035	0.995478	1.00888	0.998723	1.02052	1.02342	1.02809	0.973641	0.995353	0.962464	0.937697	0.926595	0.834212	0.826402	0.897336	0.996987	0.980794	1.01158	0.995674	1.00042	1.02214	1.00948	0.982995	1.00779	1.04987	1.03113	1.0111	0.996554	0.979496	0.984698	1.01852	0.979373	0.89127	0.825069	0.885775	0.914653	0.943867	0.989154	0.965195	0.992012	1.01186	1.02645	0.998515	1.06222
	1.31498	1.00445	1.00739	1.00702	0.988528	0.994631	0.989426	1.04175	1.03616	1.03052	0.996859	1.03341	0.99097	1.00101	0.961001	0.953301	0.921228	0.847226	0.846626	0.947011	0.986645	0.968864	1.02573	1.02366	1.00929	1.00681	1.01018	0.996915	1.03693	0.98786	1.04244	0.964239	1.02363	0.983178	1.01584	1.00073	0.972021	0.949623	0.848528	0.840482	0.927654	0.919156	0.937696	0.96361	0.970362	0.999915	0.998421	1.01809	0.999731
	1.31487	1.03051	1.0236	0.988533	1.03023	1.03903	1.02002	1.00109	1.00329	1.05058	1.0174	0.983864	1.0074	0.974878	0.954257	0.950025	0.937896	0.825919	0.836512	0.925808	0.974151	1.00864	0.98162	1.03098	1.01369	1.01465	1.02364	1.01186	1.01362	1.01556	1.0542	0.995727	1.04451	1.01742	1.01443	0.980692	0.987447	0.946998	0.825336	0.83062	0.890704	0.954714	0.93761	0.972523	1.00927	1.00444	1.01572	1.0385	1.0004
	1.31477	1.01321	1.01854	0.997906	1.01988	1.00799	1.01307	1.00536	1.00432	0.999359	1.02121	0.992294	1.00837	0.989731	0.980547	0.959351	0.928666	0.827309	0.876804	0.95883	0.972338	1.01713	1.02038	1.01873	1.00859	1.0148	1.00558	1.01083	0.98505	1.04191	1.02898	1.01384	1.0361	1.01365	0.98848	1.00481	0.997633	0.954217	0.87463	0.811822	0.895869	0.916453	0.961221	0.957722	0.986797	1.01797	0.997675	1.01268	1.02493
	1.31466	1.00811	1.03228	1.01869	0.998063	1.00463	0.990962	1.03433	0.991899	1.02167	0.995821	1.00774	0.991136	0.959046	0.940419	0.913663	0.898682	0.808897	0.900409	0.953958	0.979635	0.992685	0.97836	1.01487	0.99428	0.981928	1.0114	1.00682	1.0274	0.988125	1.00274	1.02312	0.992691	1.01883	0.979066	1.02758	0.999147	0.963039	0.884842	0.81596	0.880678	0.939065	0.924606	0.995594	1.03625	1.00938	1.01806	1.03095	1.00988
	1.31455	1.02264	1.03422	1.00428	1.01419	1.00415	1.00712	0.984885	1.04433	1.00732	1.00043	1.01246	1.00206	0.990609	0.988956	0.939601	0.876024	0.821498	0.909116	0.965044	0.975111	1.0486	0.995602	0.985782	0.977391	1.04819	0.997442	1.01199	1.03862	1.01691	1.01872	1.00842	1.02448	1.02803	1.01462	1.01285	1.01266	0.977755	0.90534	0.818231	0.881067	0.907496	0.951816	0.969526	0.999915	0.98134	1.00622	1.03393	1.00047
	1.31444	1.0196	0.99699	1.00943	1.00301	1.01542	0.985126	1.0425	1.00971	1.03376	0.9855	0.984602	0.985543	0.953943	0.950726	0.905648	0.848888	0.841708	0.92184	0.983321	1.01176	0.995103	1.00539	1.01334	0.978204	0.991906	1.01943	1.01226	1.00184	1.00524	1.00529	1.03132	1.02056	0.989646	0.985258	1.01706	0.993721	0.98291	0.915274	0.799619	0.858857	0.89509	0.935927	0.958843	0.986257	0.990156	1.00645	1.0254	1.00065
	1.31434	1.01541	1.03077	1.01267	1.02418	0.990294	0.997812	1.01856	0.990637	0.985571	1.01566	1.00084	0.974285	0.960577	0.942514	0.939833	0.863029	0.85303	0.943727	0.971528	1.00072	1.01695	1.00093	1.04519	0.996333	1.01346	1.03356	0.996899	1.01702	0.994789	1.00872	1.02323	1.01905	1.01301	1.01004	1.0094	1.015	0.988228	0.944253	0.809671	0.837409	0.89008	0.940526	0.960388	0.972567	0.987054	0.988967	1.01361	0.995435
	1.31423	0.997228	1.02529	1.01878	1.01849	0.990004	1.00301	1.03284	1.01883	1.00866	1.01711	0.993116	0.995392	0.97897	0.912357	0.917362	0.833385	0.865547	0.950212	0.99162	0.996153	1.01554	0.996346	0.995292	1.00949	1.03491	1.01854	1.00524	1.04775	0.99391	0.986517	1.03816	1.01922	1.03029	1.01003	1.02307	1.02281	0.97676	0.949621	0.86593	0.839789	0.898076	0.951369	0.928274	0.982192	0.975727	0.993974	0.991008	1.00481
	1.31412	1.01926	0.999712	1.01955	1.0148	1.019	0.995746	1.01384	0.994899	1.02026	1.01687	1.01236	0.987855	0.952538	0.909483	0.900203	0.823459	0.922511	0.9586	1.01425	0.994597	1.04311	0.969034	1.01753	1.0167	1.0315	0.997811	1.01954	1.04764	1.00331	1.01298	1.00321	1.02677	1.02474	0.999684	1.01927	1.02096	0.971571	0.953963	0.876446	0.838023	0.880173	0.923641	0.962105	0.982632	0.981949	0.985863	0.99845	1.00477
	1.31402	0.990055	1.0288	1.02531	1.03514	1.00692	1.01697	1.02354	0.969189	1.02184	0.988411	0.993994	0.990806	0.95751	0.948771	0.902202	0.811726	0.911155	0.978871	0.997065	0.996523	1.01233	1.00554	1.01245	1.0151	1.00451	1.00933	0.98709	1.03443	1.0329	1.01143	1.04159	1.02307	1.01204	1.002	1.03247	1.02103	0.989516	0.997395	0.908036	0.832444	0.86722	0.925333	0.949199	0.998937	0.97021	1.03042	1.00563	0.995898
	1.31391	1.03931	1.04153	1.02877	1.03857	1.01306	0.997588	0.994725	0.991528	1.00516	0.996575	0.990544	0.974156	0.966878	0.958484	0.862857	0.795766	0.926077	0.973097	0.993864	0.995302	0.99914	1.00592	1.02789	1.01219	1.01543	1.01116	0.998383	1.03077	1.0181	1.02448	1.04888	1.01955	1.0033	1.0267	1.0304	1.03403	1.00641	0.981202	0.913135	0.821563	0.869792	0.9174	0.921566	0.991172	0.992254	1.01871	0.998604	0.999905
	1.3138	1.04686	1.05218	1.0177	0.992037	0.995187	1.01257	1.01985	1.01928	1.02972	0.990592	0.981386	0.975024	0.95801	0.927031	0.867837	0.845901	0.958761	0.969448	1.00977	1.00603	1.01797	1.02109	1.01613	1.00459	0.991969	1.03644	1.01922	1.01673	1.01475	1.02454	1.01819	1.00349	1.03406	0.994123	1.02854	1.02118	0.999824	0.962457	0.930451	0.874972	0.863304	0.904192	0.932323	0.96217	0.95157	0.998669	1.01414	0.996703
	1.3137	1.02303	1.02533	1.04045	1.01007	0.99566	1.01257	1.02288	0.99672	0.997027	0.994071	1.00581	0.972171	0.940436	0.920552	0.835049	0.829964	0.926314	1.00768	1.00345	1.01648	1.02146	1.00143	1.01619	1.01928	1.02083	1.00722	0.993872	1.01706	1.02534	1.05104	1.03042	1.03051	1.03757	1.00666	1.01076	1.00208	0.99831	1.01126	0.991296	0.888405	0.816666	0.933046	0.937475	0.961528	0.966879	1.01394	1.0241	1.01068
	1.31359	1.0021	1.02368	1.0232	1.00708	1.00624	1.01837	1.02994	1.01664	1.05388	1.02156	0.982464	0.958178	0.953948	0.908358	0.836302	0.841059	0.975759	0.999976	1.02885	1.00499	1.03155	1.0102	1.02913	1.01036	1.01657	0.997244	1.02433	1.0208	1.03399	1.01804	1.01496	1.03212	1.04444	1.02519	1.04223	1.01441	1.00085	0.989623	0.979375	0.879574	0.832947	0.886146	0.924448	0.983221	1.00259	1.01341	1.01861	1.00251
	1.31348	1.01356	1.00888	1.04181	1.01438	1.0151	0.997228	1.0275	0.99872	1.03111	0.997874	0.992898	0.974385	0.951748	0.89315	0.820025	0.894866	0.983439	1.01811	1.01409	1.01829	1.02658	0.9963	1.01494	1.00261	1.0073	1.03018	0.992052	1.01784	1.01383	1.02201	1.03828	1.03541	1.01082	1.00289	1.01156	0.986912	0.985849	1.00093	0.992811	0.931074	0.834498	0.878587	0.923304	0.979517	0.983551	1.02576	1.01005	1.01244
	1.31337	1.02901	1.01732	1.00572	0.995904	0.997001	1.0001	1.02153	1.00453	1.01113	0.983011	0.974931	0.961513	0.960863	0.885834	0.794946	0.914834	0.969966	1.01817	0.984861	1.01508	0.991486	1.01671	1.03208	0.983737	1.02937	1.02292	0.996582	1.01143	1.03031	1.01894	1.04028	1.03034	1.02397	1.00623	1.03321	1.02313	1.02027	0.98908	0.966379	0.943746	0.826113	0.884522	0.919691	0.966685	0.979314	0.999636	1.03766	1.02687
	1.31327	1.01197	1.0202	1.02733	1.01291	1.01812	1.00433	1.02723	0.990899	1.00957	1.01034	0.979479	0.94431	0.931444	0.91484	0.829542	0.912772	0.997738	0.987012	1.00181	1.00403	1.00932	0.988238	1.03668	0.990173	0.975195	1.02737	1.00392	1.02968	1.01403	0.999466	1.00583	1.02536	1.03066	1.01228	1.01994	0.996258	1.01501	0.996129	0.983492	0.978237	0.824089	0.866098	0.935723	0.963876	0.966294	0.996777	0.998382	1.01564
	1.31316	1.00627	1.01301	1.03362	1.01422	1.00171	1.02362	1.02121	0.99836	1.02931	0.998361	0.950665	0.936499	0.924826	0.871182	0.834957	0.941351	0.994235	0.996821	1.01336	1.03115	1.0328	1.0053	1.0182	1.00002	1.00375	1.03164	1.02127	1.01556	1.02698	1.00271	1.03465	1.01446	1.00272	1.04325	1.00035	0.993829	0.997053	0.980378	0.984399	0.970125	0.847356	0.847065	0.916365	0.96738	0.977598	0.985682	0.998393	1.02524
	1.31305	1.00901	1.02291	1.01274	1.00725	0.9827	0.992461	1.011	0.997071	0.993254	1.00891	0.958918	0.959052	0.922103	0.855269	0.845884	0.953612	0.983882	1.01539	0.988075	0.988273	1.01903	1.00094	1.02562	0.992335	1.02106	1.0275	1.01463	1.02172	1.02384	1.03689	1.03016	0.973782	1.0053	0.989153	1.00144	1.03186	1.01837	1.01147	0.981	0.970362	0.841325	0.844758	0.906103	0.941327	0.961907	0.999427	1.01712	0.995395
	1.31295	1.0176	0.997887	1.00861	1.01857	1.02397	1.00311	1.03391	0.984803	1.01412	0.992383	0.981521	0.957126	0.893429	0.830611	0.86906	0.96086	0.996776	1.02625	1.01799	0.999915	0.997436	1.04904	1.00329	1.01303	1.00929	1.01485	1.02404	1.01815	0.987374	1.0057	1.01718	1.02038	1.01068	1.00727	0.995511	1.00696	0.976151	1.01151	0.998811	0.989752	0.906606	0.836471	0.895642	0.97154	0.964561	0.9946	1.02988	1.01089
	1.31284	1.04277	1.03346	1.02486	0.991067	1.01845	1.00999	1.01118	1.00056	1.01431	1.00589	0.972991	0.953616	0.918031	0.826647	0.910104	0.955244	1.00427	1.00122	0.995287	1.02023	1.01241	1.02026	1.02896	1.00831	1.00374	1.01889	1.02509	1.02969	1.03388	1.03047	1.02714	1.04079	1.04268	1.00459	1.04332	1.01862	1.02049	1.00858	0.988428	0.979091	0.922004	0.798898	0.892507	0.92748	0.949638	0.989057	1.01057	0.996973
	1.31273	1.01615	1.02573	1.01977	1.00868	0.991081	1.0141	0.999583	0.988847	1.0022	1.01204	0.959847	0.921163	0.887329	0.815389	0.919678	0.980444	0.997821	1.02021	1.01133	1.0154	1.00316	0.988961	1.04023	1.01894	1.01151	1.01883	0.9952	1.00543	1.02396	1.00957	1.05153	1.02219	1.03087	1.01776	1.02688	1.00592	0.993381	1.01761	0.978552	0.964481	0.920461	0.796724	0.872374	0.937359	0.976426	0.993125	0.996296	1.01087
	1.31263	1.02622	1.00889	1.00051	1.02317	1.00301	1.01416	1.00866	0.991374	1.00381	0.991442	0.932576	0.943834	0.880681	0.813456	0.927664	0.960487	1.02297	0.998002	1.02432	0.995957	1.02521	1.02979	1.00893	0.99027	0.999422	0.990244	1.01821	1.01502	1.02564	1.00646	1.05216	1.05595	1.01468	1.03807	1.01247	1.02517	1.02382	1.01613	1.01274	0.982776	0.94408	0.844939	0.865764	0.929373	0.953499	1.00028	0.992419	1.00435
	1.31252	0.999258	1.01043	1.01791	1.01315	0.972528	1.00712	1.0073	0.996382	1.00067	0.989312	0.959603	0.936378	0.872888	0.806688	0.963381	0.981177	1.01675	1.00098	1.01108	1.00877	1.03185	1.00784	1.00395	1.00653	1.01366	1.00862	1.03094	1.02323	1.02898	1.02259	1.01417	1.01904	1.02438	1.0273	1.02549	1.02206	1.01213	1.02172	0.99607	1.00357	0.952184	0.850252	0.84949	0.930941	0.9569	0.97648	0.999811	0.989549
	1.31241	1.0206	1.02894	1.01634	1.03658	1.01457	1.02821	1.01165	0.981357	1.01989	0.98971	0.9669	0.918216	0.887762	0.84156	0.962805	0.986743	1.0152	1.01722	1.02605	1.01719	1.03641	1.02366	1.02128	1.02389	1.02536	1.03203	1.02275	1.02048	1.0225	1.00726	1.00993	1.01305	1.02155	1.0365	1.02061	1.00996	1.01108	1.03493	1.00905	0.992375	0.956837	0.888299	0.841904	0.947723	0.931044	0.97627	1.00485	1.01586
	1.31231	1.01741	1.01448	1.01319	1.01586	1.01329	1.00463	0.996824	0.997378	0.999353	0.989567	0.963087	0.929019	0.844727	0.839021	0.965666	0.995052	1.0168	1.00944	1.02135	1.02207	1.03642	1.00412	1.06482	1.00603	1.01543	1.03643	1.02165	1.00742	1.00836	1.00566	1.01773	1.00812	1.03583	1.00449	1.01516	1.01847	0.993167	1.02426	1.03185	1.01082	0.969189	0.904412	0.810671	0.946281	0.946472	0.993906	1.03089	1.01584
	1.3122	1.01739	1.01445	1.03538	1.00736	1.01341	1.00877	1.0295	0.976944	0.987509	0.962848	0.975647	0.924385	0.826665	0.865907	0.980398	0.992426	0.989106	0.986396	1.01983	1.00777	1.01446	1.02844	1.03828	1.00589	1.04509	1.02777	1.02159	1.01781	1.019	1.01906	1.004	1.02393	1.00404	1.04166	1.03975	1.03546	1.01701	0.988618	1.02222	0.997715	1.01467	0.936218	0.837553	0.909372	0.933965	0.956079	0.981277	1.01765
	1.31209	1.01497	1.00333	1.04082	1.01022	1.02475	0.999119	1.01589	0.970773	0.99021	0.957928	0.946831	0.918165	0.823072	0.894982	0.991781	0.989053	1.0012	1.03036	0.998737	1.01569	1.02536	1.00652	0.996486	1.01943	1.02226	1.00878	1.00815	1.03327	1.00278	1.03074	1.01702	1.03282	1.02033	1.02749	1.03916	1.01138	1.00086	1.0315	1.0301	1.01698	0.966856	0.951905	0.797484	0.912026	0.951159	0.970397	0.980152	0.982552
	1.31199	1.02176	1.01502	1.02005	1.00577	1.0015	1.01153	0.997898	0.97798	0.981227	0.97392	0.966674	0.902728	0.822101	0.921045	0.994428	1.01237	1.02746	1.03123	1.01225	1.03896	0.996127	0.992451	1.054	1.02204	1.03761	1.04194	1.0106	1.0239	1.01332	1.04367	1.0186	1.01631	1.0385	1.03626	0.995873	1.02243	1.01941	1.00995	1.01901	1.02625	0.974896	0.945529	0.784661	0.912615	0.931274	0.980576	0.985006	1.03006
	1.31188	1.01779	1.01525	1.00832	0.991691	0.984422	1.01156	0.999432	0.996635	0.979057	0.963296	0.936798	0.915468	0.811092	0.908633	0.983067	1.02055	1.02069	1.00489	1.02989	1.01017	1.0323	1.01744	1.01285	1.03377	1.03105	1.02618	1.011	1.05363	1.02247	1.02011	1.03843	0.993679	1.01856	1.004	1.00331	1.0459	1.01403	0.994076	1.01923	1.00796	0.986396	0.967873	0.795734	0.874876	0.915437	0.95307	0.993731	0.992086
	1.31178	0.990028	0.987752	1.03028	1.0135	1.00114	1.02503	1.04619	0.998465	0.99917	1.00229	0.96202	0.872001	0.797176	0.957525	1.0024	0.984202	1.04465	1.01914	1.02119	1.01567	1.02188	1.01115	1.02301	1.02554	1.01478	1.02163	1.00547	1.02112	1.01912	1.02746	1.03292	1.0186	1.03837	1.03625	1.03177	1.01384	1.00924	1.02449	0.984254	1.00631	0.997792	1.00364	0.822807	0.860287	0.909202	0.956208	1.01573	1.00242
	1.31167	1.00973	0.994128	1.00225	0.993691	0.997144	0.991292	1.03219	1.00016	0.99608	0.952441	0.925292	0.862962	0.831654	0.986293	1.01814	1.00325	1.0172	1.03431	1.03329	1.03296	1.01701	1.01785	1.03466	1.01473	1.00931	1.02488	1.00926	0.977991	0.987829	1.05419	0.987084	1.02396	1.03488	1.01928	1.02469	1.01072	1.01466	1.01643	1.02895	1.01383	1.01299	0.955221	0.83792	0.856868	0.929358	0.954361	0.946611	0.989096
	1.31156	1.0297	1.01892	1.02824	1.02939	1.00667	1.00611	1.00551	1.00276	0.977685	0.931504	0.92948	0.844748	0.854321	0.961241	0.986374	1.01713	1.02992	0.990874	1.02971	1.00464	1.03193	1.01804	1.01209	1.02588	1.00304	1.01783	1.00025	1.00337	1.01423	1.00952	1.00429	1.04139	1.04843	1.0103	1.0577	1.05776	1.04021	0.995531	1.0243	1.01945	1.002	0.968278	0.878504	0.85062	0.907021	0.960041	0.994485	0.984737
	1.31146	1.0107	1.00326	1.00526	1.03049	1.00555	1.01028	1.02873	0.986672	0.972745	0.927566	0.91905	0.845	0.883492	0.968821	0.971831	0.982841	1.00346	1.03499	1.00331	1.01296	1.00271	1.01379	1.06081	1.03067	1.01588	1.02808	1.00821	1.02872	1.00827	1.03606	1.0521	1.03922	1.01337	1.05551	1.02137	1.02918	1.01583	1.02651	1.01324	1.02289	0.999322	0.979523	0.900326	0.841027	0.9125	0.944112	0.964934	1.00341
	1.31135	1.00506	0.990647	1.0354	1.03983	1.007	0.995286	1.0166	0.991004	0.97692	0.947116	0.913193	0.810716	0.906492	0.979256	0.99919	1.01568	0.992736	1.01367	1.03701	1.02084	1.00341	1.02727	1.02142	0.996718	1.01709	1.02286	1.00484	1.00469	1.01679	1.02064	1.00919	1.00308	1.01912	1.03832	1.02304	1.03875	1.0303	1.01214	1.03286	1.00834	0.993037	0.981821	0.914054	0.809288	0.885074	0.950087	0.995183	1.00429
	1.31124	1.03849	1.03551	1.01223	1.03145	1.01692	0.99953	1.00511	0.985035	0.966392	0.917831	0.917931	0.820445	0.917027	0.996315	1.00896	1.02666	1.01997	1.03733	1.0223	1.02084	1.06551	1.02298	1.02702	1.01437	1.04069	1.02566	1.01835	1.03384	1.03969	1.02699	1.03921	1.02305	1.04955	1.02786	1.0366	1.0304	1.0303	1.03718	1.0285	1.00623	1.00012	0.999221	0.921562	0.810602	0.877225	0.944851	0.98069	1.0051
	1.31114	0.998333	0.998467	1.00009	1.02372	1.02372	1.00411	1.01401	0.984762	0.971945	0.939833	0.914228	0.785437	0.914841	0.986624	1.01474	1.01437	1.02273	1.0227	1.01528	1.00654	0.999154	1.01623	1.03107	1.00905	1.02851	1.02834	1.01754	1.01886	1.02306	1.03592	1.01725	1.02315	1.00505	1.02371	1.01475	1.01487	1.02343	1.0348	1.02789	1.0259	1.01671	1.01684	0.940783	0.806328	0.871744	0.940426	0.952373	0.982775
	1.31103	1.02682	1.03191	1.02212	1.0089	1.01505	0.9896	1.02248	0.964126	0.998814	0.924636	0.905528	0.817977	0.964829	0.979463	1.03845	1.00947	1.01316	1.0268	1.02401	1.0099	1.02452	1.01007	1.02802	1.00009	1.02507	1.00785	1.00902	1.03258	1.01354	1.01902	1.03148	1.02347	1.02451	1.03555	1.01668	1.02435	1.03925	1.03654	1.00936	1.01801	1.01261	1.01605	0.948409	0.810498	0.861881	0.931411	0.953435	0.968995
	1.31092	0.995133	1.02948	1.03797	1.01135	1.00572	0.998977	1.01593	0.980203	0.946528	0.943463	0.883974	0.831869	0.964492	0.992577	1.00058	1.01821	1.0083	1.02012	1.02812	1.01426	1.0416	1.02819	1.03264	1.00891	1.03068	1.00235	1.02654	1.02234	1.02592	0.985365	1.03865	1.02643	1.03158	1.03621	1.00638	1.01603	1.03763	1.02043	1.03658	1.01469	1.01843	0.997897	0.962774	0.819849	0.822729	0.930352	0.964651	0.97943
	1.31082	1.03239	0.989947	1.03881	1.01131	1.01067	0.992434	1.01541	0.986593	0.960808	0.945309	0.866687	0.849704	0.986693	0.981826	1.00309	1.03195	1.04139	1.00572	1.04184	1.01221	1.01753	1.02211	1.03311	1.01152	1.02779	1.01996	1.00203	1.03304	1.01154	1.02125	1.04257	1.02778	1.01847	1.03028	1.01951	1.04935	1.01601	1.02551	1.01258	1.00559	0.999105	1.00818	0.971288	0.853889	0.821306	0.931342	0.975418	0.979276
	1.31071	1.02635	1.01517	1.03288	1.00454	0.995578	0.990926	1.00434	0.979423	0.940703	0.90602	0.844382	0.845644	0.95658	0.968692	1.02537	1.02112	1.03182	1.02388	1.0187	1.01026	1.02849	1.02337	1.01601	1.0301	1.02732	1.02873	1.01793	1.02971	1.02131	1.03316	1.02342	1.03592	1.0237	1.03925	1.01849	1.02676	1.04687	1.03269	1.02826	1.00921	1.01309	1.00604	0.973579	0.885934	0.803402	0.919814	0.958099	0.963473
	1.31061	1.02202	1.0045	1.02605	1.02159	0.994851	0.989063	1.00851	0.966343	0.936417	0.911364	0.842688	0.881405	0.973598	0.998649	1.02205	1.01043	1.03834	1.01712	1.03039	1.0072	1.00094	1.03436	1.02152	1.02071	1.02211	1.01694	1.00345	1.02611	1.01551	1.01834	1.01889	1.03137	1.02358	1.02478	1.01852	1.02574	1.01747	1.01401	1.00201	1.00799	1.01994	0.991645	0.959645	0.897942	0.791427	0.917237	0.961512	0.972779
	1.3105	0.993467	0.99964	1.0213	1.00998	1.0065	1.01578	0.989707	0.9647	0.951682	0.919832	0.807255	0.884875	0.993269	1.00187	1.02101	1.02693	1.00734	1.02393	1.0214	1.02199	1.03073	0.998255	1.0237	1.00199	1.01309	1.03384	1.01134	1.03213	1.05855	1.01625	1.01108	1.03132	1.02833	1.02819	1.0233	1.03742	1.00816	1.03071	1.00167	1.01052	1.00096	0.996758	0.980508	0.927617	0.78621	0.894155	0.930964	0.984118
	1.31039	1.02002	1.02944	1.00238	1.01494	1.0009	1.00533	0.989855	0.945101	0.950086	0.903588	0.817269	0.916865	1.0041	0.989126	1.01003	1.01574	1.0314	1.01518	1.02151	1.02312	1.02522	1.01103	1.03527	1.02523	1.02793	1.00951	1.03576	1.04381	1.02482	1.02772	1.02023	1.00647	1.02267	1.01748	1.03598	1.01216	1.01437	1.03035	1.01348	1.02239	1.00405	1.00885	0.971949	0.935717	0.776231	0.894935	0.943933	0.954359
	1.31029	1.00623	1.00267	1.02319	1.01099	1.00676	0.995987	1.00724	0.957818	0.938208	0.899238	0.808117	0.932554	0.989662	1.00123	1.0271	1.01781	1.00864	1.0263	1.02712	1.01984	0.995074	1.03538	1.05021	1.03048	1.01071	1.02601	1.02806	1.01847	1.02038	1.00988	1.02807	1.01202	1.01835	1.02506	1.00981	1.01912	1.01211	1.02315	1.00576	1.00414	1.02063	1.00689	0.964207	0.946069	0.799831	0.880064	0.959483	0.975261
	1.31018	1.02293	1.01444	1.00444	1.01394	1.0099	0.992328	1.00204	0.97667	0.920501	0.870876	0.803656	0.963108	0.992804	1.0046	1.03308	1.02178	1.01732	1.01973	1.02606	1.01545	1.03181	1.02376	1.03746	1.02333	1.00288	1.03777	1.0117	1.02664	1.01166	1.01367	1.03037	1.01084	1.00487	0.998948	1.00426	1.02368	1.03031	1.02819	1.01716	1.0295	1.01035	1.01841	0.986327	0.981003	0.789153	0.872714	0.934282	0.973668
	1.31007	1.02602	1.03114	1.01432	0.979486	0.993586	0.98499	0.988884	0.941815	0.926737	0.858376	0.818267	0.958795	0.978578	1.00158	1.01118	0.994157	1.04251	1.03308	1.00664	1.03216	1.01776	1.01239	1.02684	1.02337	1.00414	1.02806	1.01575	1.02889	1.02719	1.03913	1.03498	1.00751	1.03762	1.0468	1.0366	1.02844	1.01185	1.01921	1.01763	1.00857	1.0169	1.00413	0.976891	0.954297	0.822061	0.877763	0.940359	0.95677
	1.30997	1.02952	1.00956	1.01627	0.985747	0.977551	1.01204	1.00505	0.939193	0.936254	0.857791	0.843834	0.941758	0.996526	0.999146	1.02898	0.988695	1.02608	1.00485	1.03174	1.01666	1.06065	1.05064	1.02479	1.01323	1.04469	1.02615	0.997728	1.02328	1.01596	1.00885	1.0204	1.036	1.01961	1.04468	1.02368	1.03797	0.992237	1.05907	0.995779	1.01447	1.03139	1.0173	0.97246	0.967767	0.825982	0.863322	0.923203	0.951767
	1.30986	1.0139	1.001	0.991347	1.01974	0.999091	0.989067	0.995997	0.956353	0.897568	0.835857	0.863763	0.958526	0.998507	1.01183	1.02608	1.02584	1.01311	1.03864	1.00024	1.01231	1.03085	1.01981	1.02792	0.996176	1.03228	1.02617	1.01883	1.03694	1.0116	1.03689	1.02814	1.03817	1.01651	1.01694	1.04201	1.03081	1.03146	1.01815	1.02175	1.02389	1.0184	0.999099	1.00285	0.969569	0.867685	0.820879	0.92902	0.94338
	1.30976	1.01207	0.998	1.01144	0.98584	0.997066	0.96924	1.0051	0.939835	0.928617	0.827479	0.892887	0.964152	1.02461	0.986988	1.01924	1.01007	1.02937	1.02221	1.00769	1.04032	1.0319	1.01047	0.998796	1.02879	1.02515	1.02531	1.01869	1.02477	1.01186	1.01535	1.02057	1.00931	1.02655	1.0422	1.02272	1.01625	1.01384	1.03504	0.990861	1.02283	1.01203	1.02225	0.987213	0.987275	0.89714	0.811926	0.928497	0.941799
	1.30965	1.02623	1.0162	0.993443	1.01579	0.995943	0.985798	1.00503	0.927764	0.922445	0.822696	0.921591	0.995173	1.00276	1.00932	0.995384	1.02874	1.02486	1.03183	1.03172	1.04188	1.02027	1.01807	1.01558	1.00608	1.01578	1.01707	1.01466	1.01624	1.02509	1.02836	1.02174	1.00772	1.02561	1.03991	1.01091	1.00787	1.02374	1.01425	1.02239	1.01628	1.02241	0.99997	1.00202	0.980449	0.897571	0.798902	0.92372	0.963939
	1.30954	1.00423	1.02095	1.00474	1.0196	1.00996	1.00668	0.999049	0.913045	0.912157	0.822129	0.948326	0.977406	1.00758	0.993161	1.03073	1.01994	1.01857	1.03181	1.03486	1.01074	1.02662	1.03121	1.00882	1.02218	1.02211	1.02092	1.0346	1.01111	1.04117	1.02423	1.04416	1.01225	1.02143	1.00414	1.03396	1.02857	1.00955	1.03648	1.02112	1.01958	1.01445	1.04084	0.98323	0.983311	0.925109	0.795856	0.903256	0.958749
	1.30944	1.01921	1.02284	1.01232	1.00153	1.00282	0.986222	0.96434	0.950185	0.874268	0.798737	0.948307	1.00062	1.01217	1.0148	1.00447	1.00386	1.03013	1.02137	1.02755	1.0373	1.04013	1.03443	1.0237	1.00582	1.02787	1.02466	1.02246	1.03046	0.994268	1.02413	1.02927	1.02603	1.0289	1.02143	1.00603	1.02079	1.01899	1.04676	1.04278	1.02645	0.987447	1.02359	0.996199	0.992173	0.921644	0.807377	0.926286	0.945651
	1.30933	1.00704	1.02075	1.01593	1.01194	0.994743	0.990044	0.98562	0.930418	0.892865	0.815256	0.952473	0.98029	0.99731	1.00029	1.01388	1.01709	1.01766	0.998445	1.0604	1.02565	1.01727	1.01128	1.0197	1.0292	1.01914	1.02284	1.01252	1.02616	1.02849	1.01152	1.03894	1.02823	0.984618	1.04468	1.02534	1.01066	1.03149	1.02618	1.008	1.01716	1.01501	1.02952	1.00603	0.977926	0.922404	0.822935	0.895342	0.927115
	1.30923	0.999594	1.01326	1.02097	1.01577	0.987008	0.988129	0.981216	0.932061	0.890967	0.841273	0.955245	0.997318	1.00102	0.996862	1.0156	1.00295	1.01458	1.02363	1.03512	1.02143	1.02357	0.997356	1.04416	1.01561	1.01828	1.02469	1.03473	1.01142	1.02525	1.01508	1.0163	1.01814	1.03225	1.00948	1.04096	1.02435	1.01963	1.01629	1.02253	1.01096	1.00004	1.02006	0.987161	0.982042	0.935284	0.828	0.886764	0.923545
	1.30912	1.01919	1.00116	1.01532	1.01664	0.986062	0.984609	0.957579	0.914864	0.865292	0.840311	0.976592	1.00059	1.0001	0.988744	1.02228	1.00867	1.01777	1.03427	1.01075	1.02256	1.03613	1.00851	1.03291	1.02344	1.01811	1.02851	1.02094	1.01757	1.02993	1.0282	1.02514	1.01085	0.995953	1.0158	1.03939	1.03176	1.03405	1.03168	1.00933	1.03698	1.02159	1.02632	0.984861	0.993397	0.960597	0.858436	0.868568	0.933974
	1.30901	1.03603	1.02236	1.04166	1.00817	0.995923	0.983307	0.979717	0.921532	0.852776	0.873706	0.978122	1.01138	0.99861	1.01514	1.02238	1.04267	1.02552	0.995448	1.03785	1.01935	1.01369	1.01	1.01546	1.00172	1.02123	1.01582	1.0009	1.03487	1.01221	1.03638	1.02875	1.00526	1.02635	1.05086	1.03111	1.01549	1.0277	1.04033	0.995312	1.00891	0.997757	1.00023	0.967121	1.00177	0.955243	0.873552	0.84361	0.935809
	1.30891	0.997406	0.989589	1.00103	1.00001	1.00668	1.01329	0.980952	0.896178	0.837495	0.900785	0.995511	0.98609	0.999889	1.01484	1.03813	1.02566	1.02137	1.02163	1.03485	1.02632	1.03692	1.00742	1.02937	1.01719	1.02504	1.03045	1.0223	1.0336	1.01657	1.01293	1.01283	1.00694	1.02855	1.01794	1.00358	1.02856	1.01149	1.02426	1.04375	1.03408	1.02351	1.0104	0.994513	0.998229	0.957162	0.912289	0.857848	0.907697
	1.3088	1.01466	1.00149	1.01127	1.0144	0.998339	0.978985	0.9618	0.89766	0.808759	0.904961	0.983789	1.01202	0.997512	1.02154	1.03635	0.980775	1.01922	1.03722	1.04614	1.02057	1.03742	1.00906	1.02177	1.01702	1.03109	1.01787	1.01257	1.01178	1.01889	1.00859	1.03679	1.01553	1.02854	1.03143	1.00557	1.00948	1.01742	1.02229	1.03956	1.00373	1.01325	1.03989	1.02459	0.989202	0.972169	0.906864	0.816516	0.910085
	1.3087	1.03077	1.00877	1.01276	1.00377	0.990209	0.981717	0.956648	0.898731	0.822607	0.946261	0.991767	1.00806	0.999814	1.03335	1.00837	1.01551	1.02446	1.01788	1.02918	1.03853	1.02912	1.01055	1.02777	1.04104	1.02171	1.03385	1.01444	1.01126	1.00452	1.00823	1.00329	1.02055	1.02715	1.00181	1.02356	1.03515	1.01347	1.03666	1.00076	1.01805	1.01317	1.02672	0.984068	0.998078	0.976601	0.941374	0.837073	0.927507
	1.30859	0.989352	1.0267	1.00737	1.01699	1.00361	0.989262	0.952151	0.90686	0.801157	0.935251	1.00009	1.01515	1.01876	1.01142	0.993519	1.02483	0.997971	1.0204	1.02282	1.01421	1.03045	1.04352	1.0428	1.03276	1.00013	1.01691	1.02375	1.00626	1.00616	1.02645	1.01642	1.04156	1.0299	1.04267	1.01977	1.05616	1.01601	1.03511	1.01743	1.03523	1.0119	1.02151	0.980707	1.01017	0.982651	0.944974	0.838549	0.93188
	1.30848	1.01861	1.01928	1.01915	1.01852	1.00283	0.957136	0.96474	0.904697	0.811813	0.947487	1.01734	1.00514	0.984179	0.994633	0.989413	1.02146	1.02195	1.02306	1.01289	1.02457	1.02296	1.01779	1.02181	1.01745	1.02031	1.01945	1.03735	1.03501	1.02553	1.03669	1.0081	1.017	1.04651	1.01066	1.01699	1.02487	1.03168	1.03281	1.00226	1.01401	1.02919	1.00642	0.9861	0.99381	0.959284	0.965394	0.81671	0.906504
	1.30838	1.01776	1.00887	1.01825	1.00568	0.968235	0.982305	0.960586	0.908447	0.840941	0.959662	1.01102	1.01134	0.997	0.992962	1.00359	1.02379	1.0329	1.02436	1.02808	1.02201	1.01838	1.01809	1.04073	1.03638	1.0061	1.02306	1.0045	1.00297	1.04494	1.01295	1.04704	1.02211	1.04686	1.03164	1.02781	1.03722	1.0317	1.01187	1.01625	1.0099	1.03767	1.03547	0.987093	1.00463	0.98222	0.957459	0.850891	0.906012
	1.30827	1.02004	0.995121	1.01827	1.00691	1.00392	0.968403	0.929016	0.897199	0.841425	0.971697	0.986409	0.969502	1.01205	0.997503	1.00081	1.03621	1.02078	1.03939	1.01818	1.04753	1.03043	1.02165	1.02184	0.995487	1.03461	1.03287	1.03101	1.00925	1.0519	1.01147	1.02931	1.02725	1.05104	1.02544	1.03573	1.03295	1.0398	1.04487	1.01806	1.0276	1.03753	0.996356	0.993477	1.01585	0.984022	0.965301	0.85	0.860141
	1.30817	0.994528	0.995365	1.00986	0.996703	1.00769	0.942378	0.958307	0.892603	0.854989	0.975135	1.00735	1.01031	1.01657	1.00424	1.01621	1.00784	1.0159	1.01685	1.01653	1.03389	1.03572	1.03384	1.02185	1.01756	1.00961	0.995812	1.02266	1.04167	1.03344	1.01499	1.02931	1.03123	1.0262	1.04378	1.01388	1.01007	1.0265	1.02675	1.03312	1.03274	1.00609	1.02704	1.00686	0.982404	0.978257	0.968465	0.871676	0.873851
	1.30806	1.03186	1.01101	1.01098	1.0375	0.96101	0.975494	0.937033	0.880924	0.878607	0.96938	1.00708	0.998077	0.998859	1.0245	1.0039	0.999743	1.02727	1.03343	1.02951	1.03374	0.996164	1.02894	1.03259	1.03314	1.02649	1.04894	0.9999	1.03768	1.02936	1.03075	1.02674	1.02987	1.03025	1.0339	1.03376	1.04358	1.00737	1.03278	0.99547	1.01644	1.01722	1.02696	0.990385	0.990711	0.99171	0.984773	0.896624	0.856643
	1.30796	1.03342	1.01791	0.995294	1.02756	0.97608	0.945404	0.954116	0.876647	0.898269	0.977072	1.00237	1.01394	1.01328	1.0167	1.03185	1.02036	1.02191	1.01872	1.0283	1.02697	1.03279	1.02094	1.01854	1.01556	1.02389	1.02977	0.997064	1.01891	1.0211	1.01627	1.01874	1.04285	1.0374	1.0271	1.03558	1.01046	1.01762	1.01756	1.04313	0.995053	0.999064	1.01161	0.993576	0.999973	0.989619	0.972699	0.909778	0.852123
	1.30785	1.00684	1.00117	0.994745	1.00378	0.98273	0.958575	0.932499	0.853317	0.915368	0.978883	1.00905	0.983688	0.996172	1.02637	1.0229	1.02798	1.02869	1.01898	1.02719	1.0268	1.03612	1.02224	1.03408	1.02902	1.03403	1.03187	1.01389	1.01753	1.028	1.03012	1.00828	1.03205	1.01748	1.01884	1.01765	1.00795	1.02812	1.03321	1.02498	1.0207	1.02765	1.01009	1.00202	1.00592	0.9748	0.97765	0.940296	0.821226
	1.30774	0.997408	1.01384	1.00558	1.01447	0.979456	0.971097	0.927305	0.846797	0.938032	1.01607	1.00683	1.00797	1.01338	1.01606	1.0347	1.012	1.02603	1.02908	1.04501	1.009	1.01754	1.00891	1.024	1.02013	1.03024	1.02605	0.998134	1.0311	1.02159	1.01471	1.04261	1.02765	1.06028	1.0314	1.04028	1.02012	1.02082	1.02847	1.02013	1.05119	1.0181	1.03338	1.00525	1.00596	0.990763	0.990561	0.947319	0.81855
	1.30764	0.979689	1.02629	1.00078	0.992925	0.991621	0.954794	0.921151	0.819682	0.940595	0.997457	1.00597	1.00641	1.01627	1.01123	1.04083	1.02175	1.02161	1.02152	1.02952	0.996854	1.03979	1.02566	1.02794	1.0176	1.02378	1.02241	1.0062	1.02057	1.0322	1.02105	1.02775	1.02031	1.01732	1.01894	1.02338	1.02134	1.02625	1.03076	1.03217	1.03161	0.993712	1.03095	0.982446	1.01275	0.999558	0.984413	0.959314	0.801859
	1.30753	1.00156	1.01053	1.03195	0.99991	0.967115	0.956007	0.92997	0.808915	0.974451	0.996374	1.01725	1.00416	1.01981	1.02063	1.01997	1.00173	1.02848	1.04902	1.02648	1.0222	1.02042	0.999221	1.03438	1.01857	1.03111	1.02831	1.02358	1.03458	1.03781	1.03564	0.999888	1.05091	0.996799	1.0213	1.01866	1.05035	1.0343	1.01982	1.02839	1.02338	1.01734	1.03594	0.994368	1.02314	0.996882	0.987948	0.98023	0.800466
	1.30743	1.01954	1.00328	1.02017	1.02034	0.953222	0.95079	0.924064	0.79327	0.945528	1.00534	0.995194	1.00935	1.02437	1.01167	1.03375	1.00831	1.01659	1.0219	1.03425	1.02125	1.03101	1.02404	1.01398	1.00567	1.02736	1.02271	1.0281	1.00799	1.02685	1.01923	1.02942	1.00939	1.01077	1.02778	1.02458	1.0468	1.04357	1.03363	1.03659	1.02449	1.01245	1.02677	0.993388	1.0375	0.996268	0.996485	0.961899	0.811015
	1.30732	1.00773	1.00426	0.999714	1.00155	0.958564	0.934749	0.894762	0.804574	0.96029	0.994061	1.00739	1.026	1.03719	1.00019	1.03427	1.02956	1.01402	1.0419	1.02771	0.999835	1.02382	1.02419	1.0505	1.03369	1.02523	1.02789	1.0172	1.01798	1.01443	1.00264	1.02668	1.00914	1.04108	1.04333	1.01309	1.02124	1.00775	1.02514	1.01635	1.04035	1.03054	1.03518	1.0112	1.01686	1.0035	1.00228	0.993348	0.824917
	1.30722	0.991781	0.992046	1.00252	1.00273	0.968418	0.939736	0.909234	0.806616	0.956326	0.999029	1.01557	1.01259	1.00826	1.01511	1.02415	1.03743	1.03247	1.02745	1.00085	1.00642	1.02829	1.03182	1.0386	1.02142	1.04291	1.03572	1.00712	1.02877	1.02686	1.03481	1.01643	1.043	1.03131	1.028	1.02563	1.0535	1.00567	1.0334	1.02496	1.02378	1.0297	1.0152	0.996726	1.009	0.995303	1.00324	0.969895	0.835669
	1.30711	0.999346	0.996667	1.00027	1.00215	0.944047	0.930139	0.906006	0.80397	0.979074	1.00776	1.02146	0.983111	1.01831	1.0058	1.02253	1.0178	1.02693	1.02569	1.02446	1.0062	1.03079	1.02929	1.03645	1.03384	1.04365	1.04861	1.00626	1.03072	1.02689	1.03743	1.01415	1.06107	1.02966	1.02071	1.01877	1.05163	1.02333	1.01872	1.0243	1.02385	1.01529	1.00814	0.998492	1.01912	1.00385	0.993618	0.994788	0.889218
	1.307	0.986141	1.0008	0.991208	0.986718	0.960526	0.916891	0.880426	0.852313	0.980701	0.987691	1.0107	1.01617	1.00264	1.00156	1.02628	1.00123	1.02946	1.01736	1.03383	1.02907	1.03165	1.03011	1.02043	1.01354	1.00664	1.02527	1.0277	1.02038	1.01393	1.02049	1.03272	1.03685	1.02969	1.03546	1.02757	1.02502	1.03033	1.03405	1.02226	1.02391	0.995792	1.03978	0.998522	1.01192	0.991541	0.993548	0.982914	0.881104
	1.3069	1.00478	1.00475	1.02125	0.996463	0.950057	0.947294	0.859338	0.856168	0.995191	1.00225	1.00813	1.01613	1.01757	1.00294	1.02855	1.02165	1.02283	1.019	1.0118	1.02758	1.02504	1.01978	1.0341	1.0188	1.0176	1.04028	1.00958	0.999223	1.02259	1.00326	1.02247	1.02541	1.03937	1.02978	1.01971	1.01885	1.03033	1.02032	1.03493	1.02395	1.00507	1.0252	1.00968	1.01494	0.991533	0.992008	0.987934	0.911842
	1.30679	0.982913	1.01083	0.996858	0.994073	0.949876	0.932361	0.843356	0.889105	0.990172	1.00046	1.01444	1.01859	1.0246	1.01484	1.02412	1.02022	1.02125	1.02855	1.01425	1.0303	1.02502	1.02136	1.02863	1.02031	1.03102	1.02899	1.01547	1.01981	1.0078	1.0385	1.02249	1.02006	1.01735	1.00847	1.02508	1.01889	1.01949	1.03056	1.0277	1.03312	1.02983	1.03079	0.983196	1.00311	0.993049	0.998521	0.98446	0.926162
	1.30669	0.994139	1.00471	0.986911	0.992407	0.950742	0.918099	0.822266	0.883268	0.974529	0.998779	1.00685	0.996163	1.02387	1.0224	1.02965	1.0273	1.01019	1.04185	1.03155	1.01306	1.00415	1.0272	1.01961	1.03009	1.02386	1.02371	1.01468	1.04321	1.02619	1.0254	1.01913	1.00945	1.0288	1.03661	1.01806	1.02345	1.02135	1.02343	1.01943	1.02591	1.0226	1.02714	0.992134	1.01418	0.986806	0.996969	1.0143	0.933791
	1.30658	0.981159	0.993905	0.98541	0.994676	0.937739	0.909662	0.820647	0.910711	0.999312	1.0079	0.99528	1.02524	1.02235	1.00809	1.01885	1.02426	1.04405	1.05154	1.03781	1.01734	1.03691	1.02728	1.01305	1.00443	1.02216	1.01848	1.01787	1.03869	1.04182	1.0164	1.03035	1.02821	1.03071	1.0023	1.01129	1.02176	1.04296	1.02488	1.04968	1.03972	1.00814	1.00468	0.991523	1.01408	0.969189	0.983861	1.00061	0.953587
	1.30648	0.97604	0.991358	0.993672	0.983594	0.950963	0.906498	0.795961	0.927229	1.00262	1.00454	1.00901	1.00926	0.999223	0.998776	1.0066	1.01811	1.02313	1.00966	1.02992	1.00514	1.01063	1.03655	1.02291	1.02695	1.02303	1.01758	1.02584	1.01079	1.03062	1.03344	1.02611	1.03442	1.05536	1.0308	1.03615	1.01472	1.01775	1.02746	1.02147	1.04174	1.00803	1.01187	1.01141	1.02314	1.00075	0.98787	0.997944	0.945199
	1.30637	0.971681	0.978381	0.998431	0.998544	0.929905	0.907092	0.809935	0.935864	0.973465	1.00634	1.01636	1.02936	1.01697	1.00877	1.00601	1.03586	1.01886	1.02192	1.0291	1.01744	1.01594	1.0299	1.0221	1.02088	1.00923	1.02003	1.02911	1.03612	1.02202	1.02668	1.02108	1.03264	1.00947	1.02593	1.01413	1.03685	1.0242	1.02878	1.01806	1.0217	1.02917	1.02197	1.00412	1.01476	1.00546	0.995076	1.01133	0.953496
	1.30627	0.997896	0.982295	0.988464	0.980483	0.933693	0.914549	0.818614	0.9252	0.984523	1.02474	1.01125	1.0144	1.01468	1.00232	1.02427	1.003	1.03088	1.04175	1.0164	1.02267	1.03775	1.009	1.0449	1.01859	1.02427	1.01953	1.02778	1.00944	1.01861	1.04223	1.03734	1.01276	1.02479	1.04589	1.03434	1.02289	0.99792	1.03829	1.02064	1.02889	1.00216	1.01837	1.01597	1.00244	0.995415	0.999077	0.990996	0.960338
	1.30616	0.97934	0.992287	0.986813	0.994592	0.929651	0.902725	0.81665	0.950241	0.995268	1.01301	1.01439	1.01933	1.00178	1.01455	1.03209	1.03221	0.998171	1.01033	0.998986	1.01931	1.04362	1.02758	1.03178	1.01474	1.02987	1.02853	1.02046	1.02122	1.02377	1.01303	1.01934	1.01869	1.03171	1.01302	1.01778	1.037	1.02146	1.01734	1.01561	1.01828	1.00268	1.01593	1.00691	1.02816	0.985099	0.996666	1.00239	0.951215
	1.30606	0.976107	0.988323	0.995492	0.985815	0.929317	0.882415	0.86233	0.951063	0.983389	1.02537	1.00627	1.02425	1.02002	1.0262	1.01756	1.03124	1.04344	1.03141	1.02082	1.03729	1.01968	1.02925	1.01664	1.02912	1.03935	1.02132	1.00412	1.03538	1.03334	1.05257	1.00968	1.0215	1.01647	1.02137	1.03957	1.05093	0.991989	1.03163	1.02915	1.01323	1.01612	1.03724	0.999163	1.0181	0.996828	1.00003	1.00153	0.961772
	1.30595	0.984564	0.991357	0.993105	0.965889	0.935642	0.882108	0.868353	0.951381	1.00285	0.998565	1.02238	1.00461	1.01549	1.00955	1.04171	1.02736	1.02567	1.02063	1.03099	1.01946	1.02454	1.00659	1.03158	1.01621	0.997697	1.03084	1.02386	1.01487	1.01381	1.02102	1.01542	1.01734	1.03611	1.03752	1.02314	1.00407	1.02332	1.03544	1.03611	1.01391	1.00257	0.998366	1.02863	1.01678	0.999762	1.00728	0.995364	0.962546
	1.30584	0.974736	1.00705	0.983161	0.985975	0.923848	0.844358	0.896803	0.95317	1.0029	0.986653	1.0198	1.00224	1.02449	1.00625	1.00525	1.01387	0.995403	1.01081	1.03695	1.03377	1.02213	1.03177	1.03724	1.02852	1.04411	1.03016	1.00899	1.03462	1.0023	1.01306	1.02885	1.0191	1.05076	1.04157	1.01791	1.02584	1.02678	1.01663	1.03158	1.02826	1.02567	1.00889	1.00679	1.01238	1.01384	1.02382	1.0092	0.979704
	1.30574	0.991182	0.985931	0.992205	0.966069	0.918424	0.827954	0.917427	0.961775	1.00779	0.999494	1.00617	1.01199	1.0275	1.01843	1.02286	1.0102	1.0233	1.03074	1.02352	1.01197	1.01976	1.03268	1.02457	1.01706	1.03248	1.02289	1.01198	1.02162	1.02054	1.03294	1.02555	1.01985	1.02847	1.03029	1.02593	1.01157	1.02488	1.03759	1.03697	1.03304	1.01012	1.03792	0.988212	1.00602	1.00063	0.992175	1.00817	0.983921
	1.30563	0.962982	0.976761	0.965079	0.955501	0.920281	0.824005	0.926648	0.977289	1.00622	1.0107	1.01709	1.02006	1.0208	1.00644	1.0267	1.02448	1.01256	1.04682	1.01869	1.0373	1.0476	1.0439	1.04365	1.02023	1.02803	1.02807	1.01708	1.01939	1.03371	1.01802	1.00836	1.03747	1.01437	1.04704	1.02149	1.02505	1.04228	1.03133	1.02306	1.01188	1.00808	1.0195	1.00036	1.03007	0.963446	1.00601	1.01286	0.985614
	1.30553	0.947233	0.968355	0.974158	0.977741	0.908663	0.797351	0.946067	0.971482	1.00381	1.01478	1.0194	1.00942	1.03047	1.02224	1.0141	1.02299	1.00238	1.00276	1.02866	1.02649	1.03801	1.03624	1.0336	1.01672	1.01973	1.04688	1.03489	1.0244	1.03397	1.02654	1.0337	1.04156	1.03464	1.0377	1.0121	1.00574	1.03991	1.04767	1.03504	1.03048	1.01955	1.02416	1.00057	1.01711	0.991677	1.01173	1.01064	1.00644
	1.30542	0.960741	0.964646	0.958165	0.955039	0.901515	0.796437	0.952401	0.997473	1.01302	1.00068	1.00103	1.01172	1.01406	1.00105	1.00845	1.02798	1.01493	1.01628	1.02868	1.0367	1.0429	1.01806	1.02223	1.017	1.01329	1.01868	1.01675	1.02971	1.02761	1.02348	1.03869	1.03134	1.02715	1.03228	1.0136	1.028	1.01659	1.04208	1.04191	1.04582	1.01222	1.02614	1.00617	1.00674	0.990275	1.00569	1.00579	0.999813
	1.30532	0.963052	0.963578	0.954279	0.951956	0.90108	0.8131	0.970298	0.974773	0.993508	1.02112	1.03481	1.00708	1.0311	1.00334	1.0191	1.02437	1.02843	0.999287	1.03793	1.02229	1.04229	1.02482	1.02831	1.02407	1.01643	1.0151	1.02188	1.02871	1.03046	1.02731	1.03777	1.0372	1.02052	1.01131	1.00011	1.0438	1.01859	1.03232	1.02396	1.02377	1.02515	1.03321	1.00056	1.00835	0.997993	1.00875	1.0259	0.992124
	1.30521	0.956069	0.962908	0.974032	0.964824	0.909942	0.822042	0.951386	0.97938	0.995868	0.992141	1.01196	1.00427	1.01659	1.01677	1.01343	1.03128	1.05386	1.03481	1.0374	1.02234	1.04286	1.0088	1.04666	1.03259	1.02306	1.02026	1.0351	1.01587	1.02771	1.03479	1.04604	1.03941	1.01273	1.01233	1.05174	1.02518	1.01324	1.03637	1.03894	1.02583	1.02191	1.03139	1.02398	1.01897	1.01558	1.01376	1.00593	1.00993
	1.30511	0.949862	0.970687	0.958097	0.940262	0.893703	0.824429	0.994547	0.987457	1.00102	1.0143	1.01434	1.03058	1.01492	1.00977	1.02328	1.02496	1.01859	1.00757	1.02479	1.02239	1.03854	1.0313	1.01764	1.01872	1.0424	1.02497	1.018	1.03641	1.02379	1.00933	1.02662	1.04062	1.03991	1.01282	1.03169	1.03669	1.01558	1.01867	1.02937	1.03014	1.02151	1.02634	1.0146	1.00425	1.00306	1.0052	0.996966	0.99122
	1.305	0.935854	0.95932	0.943838	0.945561	0.900684	0.834391	0.97188	0.992567	0.988414	1.01443	1.03341	1.01736	0.999717	1.00212	1.02426	1.02806	1.00566	1.01937	1.02576	1.05142	1.03869	1.01911	1.01386	0.989502	1.01743	1.02408	1.02946	1.03846	1.03374	1.02513	1.0199	1.02068	1.02896	1.03062	1.03841	1.03054	1.02065	1.02752	1.02476	1.03685	1.00459	1.03957	0.9943	1.02281	0.993022	1.01034	1.0182	0.994926
	1.3049	0.949922	0.959097	0.931945	0.944364	0.872009	0.884775	0.982726	0.989066	0.989066	0.991068	1.03668	1.01634	1.01679	1.03134	1.03807	1.02187	1.03813	1.02346	1.00571	1.01944	1.01906	1.00396	1.01011	1.03264	1.0248	1.00987	1.00368	1.01803	1.03295	1.02295	1.03162	1.03063	1.05027	1.00705	1.03197	1.03274	1.00776	1.03286	1.02912	1.0089	1.02562	1.02537	0.984562	1.02448	0.983748	1.00698	1.00911	0.991148
	1.30479	0.938789	0.935486	0.939228	0.946243	0.859979	0.867873	1.00778	0.980163	1.0009	1.01056	1.00877	1.02333	1.00413	1.02311	1.03167	1.02646	1.03179	1.01054	1.02991	1.0452	1.02505	1.03828	1.00359	1.03933	1.00602	1.02059	1.02795	1.02656	1.0289	1.03394	1.0307	1.03371	1.03401	1.02876	1.00732	1.01994	1.02383	1.02501	1.03241	1.01604	1.04132	1.02765	1.01674	1.01951	0.994602	1.002	0.997482	1.00875
	1.30469	0.947058	0.960412	0.940017	0.940779	0.839598	0.904687	0.973727	0.982785	1.00982	1.01061	1.01458	1.03114	1.02143	1.00448	1.04592	1.0292	1.0168	1.02666	1.01881	1.02767	1.03691	1.02598	1.02612	1.01865	1.03228	1.03828	1.0297	1.02399	1.02484	1.01749	1.01667	1.01816	1.033	1.02291	1.03011	1.02864	1.00618	1.0336	1.0356	1.05335	1.04022	1.01092	1.00189	1.00059	0.996803	1.00997	1.0004	0.998404
	1.30458	0.933644	0.934614	0.938075	0.926679	0.818048	0.920575	0.987337	0.9662	1.01499	1.0086	1.03642	1.02031	0.99967	1.02223	1.01446	1.0212	1.02308	1.03108	1.01522	1.01728	1.01663	1.02696	1.03652	1.02104	1.02503	1.0368	1.0151	1.02253	1.02914	1.01689	1.0311	1.02644	1.02663	1.02784	1.02575	1.03663	1.03707	1.04705	1.03681	1.01378	1.01179	1.01763	1.01322	1.02775	0.995164	0.980899	1.01069	0.995235
	1.30448	0.93274	0.944537	0.935259	0.930968	0.83713	0.927674	0.992866	0.991486	0.99989	1.02082	1.02028	1.00589	1.01797	1.04202	1.02929	1.03105	1.02973	1.03665	1.02788	1.00327	1.01961	0.9994	1.03443	1.00674	1.04181	1.02092	1.04682	1.02908	1.02915	1.02245	1.04803	1.01808	1.02352	1.04481	1.02247	1.02315	1.03035	1.01705	1.00535	1.00914	1.02889	1.01873	1.01347	1.01369	1.00825	0.995492	1.00133	1.00966
	1.30437	0.92375	0.923414	0.92881	0.927379	0.799104	0.921905	0.978642	0.979253	1.00817	1.01369	1.0171	1.01825	1.04103	1.03327	1.03613	1.03606	1.02436	1.03124	1.03344	1.02385	1.03015	1.02709	1.05766	1.03182	1.02383	1.02378	1.02028	1.01523	1.03875	1.03512	1.0489	1.02024	1.01726	1.03189	1.01582	1.01329	1.01672	1.0355	0.995859	1.03553	1.03475	1.03376	0.995444	1.02235	0.993616	1.00515	1.02593	1.00329
	1.30427	0.924554	0.932454	0.929442	0.927433	0.786489	0.945015	0.989589	0.983138	1.01357	1.00213	1.01802	1.01824	1.00921	1.01374	1.02761	1.01664	1.02226	1.02271	1.02358	1.02833	1.02484	1.02717	1.02138	1.02283	1.01889	1.03128	1.0223	1.03879	1.00817	1.02035	1.0217	1.02767	1.00187	1.00686	1.03164	1.04028	1.0123	1.04451	1.02086	1.00362	1.00824	1.03827	1.01551	1.00846	1.00601	0.989428	1.02504	0.98593
	1.30416	0.923113	0.925221	0.913371	0.936936	0.806088	0.935697	0.985738	0.995267	1.00304	1.00851	1.01891	1.02768	1.01124	1.01128	1.02472	1.02542	1.01581	1.02275	1.0194	1.04148	1.02595	1.02416	1.01445	1.03704	1.00938	1.01811	1.00874	1.03008	1.02929	1.032	1.02378	1.03969	1.01907	1.02277	1.02831	1.02135	1.04051	1.03455	1.03239	1.03544	1.02568	1.02583	1.00948	1.00849	0.998294	1.0034	0.999381	0.984331
	1.30406	0.916466	0.904936	0.938829	0.934281	0.81671	0.950778	1.00095	0.981436	1.00934	1.01484	1.02837	1.01502	1.00823	1.0325	1.01523	1.05328	1.02459	1.01848	1.015	1.01964	1.03025	1.02214	1.03911	1.02089	1.03597	1.02567	1.02352	1.01238	1.03267	1.02209	1.01948	1.02877	1.01773	1.01683	1.02619	1.03774	1.0403	1.02571	1.01825	1.02096	1.01369	1.01165	1.00997	1.02839	0.995042	0.993971	1.02884	1.01102
	1.30395	0.911092	0.909919	0.935131	0.905134	0.822298	0.964336	1.00095	1.00137	0.991525	0.998076	1.02287	1.01713	1.01224	1.02268	1.02483	1.02167	1.01914	1.01223	1.0172	1.02956	1.03985	1.03255	1.00822	1.0052	1.02709	1.01649	1.02001	1.02605	1.01157	1.00934	1.01464	1.01831	1.03649	1.02619	1.03925	1.00472	1.03685	1.03916	1.03479	1.01784	1.03043	0.996776	0.995769	1.01538	0.996831	1.01272	1.01604	1.00139
	1.30385	0.889758	0.912439	0.916472	0.914118	0.844764	0.978682	1.00502	0.985524	1.01449	1.00767	1.00213	1.02851	1.02579	1.01557	1.04476	1.02833	1.02443	1.03792	1.03039	1.00123	1.02819	1.01085	1.01759	1.02463	0.995413	1.0269	1.0379	1.0257	1.01721	1.03942	1.00259	1.03298	1.02934	1.01889	1.02746	1.02191	1.01145	1.00759	1.01915	1.0193	1.02949	1.00631	0.996504	1.01163	0.976594	1.01139	1.01422	0.983911
	1.30374	0.88209	0.910101	0.882372	0.89932	0.872677	0.974307	1.01239	0.998593	1.01596	1.03432	1.01238	1.03389	1.01613	1.03584	1.01227	1.01786	1.02229	1.02831	1.048	1.01901	1.03024	1.01147	1.0309	1.01621	1.0273	1.01852	1.01424	1.00686	1.01548	1.0178	1.03503	1.03598	1.04245	1.03212	1.04505	1.01406	1.03654	1.02572	1.04445	1.01759	1.03696	1.01797	1.01231	1.02375	1.01022	1.00702	1.01016	1.01925
	1.30364	0.864784	0.873359	0.893116	0.889729	0.877896	0.985817	1.01531	0.978189	1.00257	0.9931	1.01526	1.01815	1.01874	1.0242	1.02201	1.02976	1.03087	1.02539	1.0364	1.0086	1.01057	1.00444	1.03881	1.0126	1.02097	1.01246	1.01211	1.04462	1.01977	1.02231	1.0151	1.01578	1.04017	1.03034	1.01368	1.02641	1.02107	1.03538	1.03057	1.03074	1.01389	1.03114	1.00919	0.994289	1.00404	1.02056	1.00804	1.01065
	1.30353	0.860827	0.905239	0.890695	0.88714	0.89151	0.969099	1.01065	0.991943	1.00887	1.00402	1.01958	1.00833	1.04699	1.02539	1.01403	1.0253	1.03254	1.02643	1.03242	1.01576	1.05978	1.01559	1.04434	1.01851	1.01354	1.01256	1.01807	1.03325	1.02645	1.03005	1.01639	1.02073	1.02989	1.02875	1.01975	1.04647	1.01876	1.0326	1.0275	1.02344	1.03299	1.01389	1.01618	1.0126	0.995447	0.984847	1.0327	0.999741
	1.30343	0.853999	0.884584	0.865956	0.866917	0.903376	1.00208	1.02305	0.987678	1.00982	1.00583	0.995108	1.00294	1.00806	1.01897	1.0416	1.01555	1.02741	1.02031	1.03512	1.04502	1.03716	1.01056	1.03426	1.01932	1.01855	1.02037	1.01468	1.0433	1.01444	1.03661	1.01019	1.01684	1.02329	1.01827	1.04772	1.04755	1.03897	1.02424	1.03403	1.02106	1.02952	1.02129	0.984274	1.01345	0.996739	1.01102	1.02702	1.00392
	1.30332	0.845123	0.844535	0.858269	0.838519	0.946046	0.987684	1.00179	0.994456	1.00971	0.994861	1.03058	1.01377	1.01297	1.02354	1.01818	1.01646	1.041	1.02657	1.03933	1.03192	1.0203	1.02731	1.02734	1.01303	1.03342	1.04912	1.02154	1.02398	1.02419	1.05066	1.01451	1.02098	1.05629	1.0224	1.03369	1.03595	1.02535	1.04215	1.02409	1.03652	1.01366	1.01246	0.99321	1.02369	1.00952	1.00428	1.02539	1.00805
	1.30322	0.825604	0.832791	0.847351	0.818309	0.928148	0.990398	1.00913	0.990263	0.988921	1.00386	1.00023	1.02312	1.00234	1.0053	1.03347	1.02795	1.03989	1.03257	1.03667	1.0353	1.02213	1.02184	1.02018	1.03207	1.03122	1.02675	1.02413	1.02592	1.02749	1.03671	1.01787	1.03748	1.03464	1.0277	1.03443	1.03183	1.02056	1.01636	1.01049	1.03474	1.02739	1.03666	0.99443	1.02671	0.99639	1.00456	1.01423	0.995178
	1.30311	0.795028	0.817713	0.820696	0.807163	0.947408	0.989619	1.01115	1.00651	0.999839	1.0225	1.02182	1.03176	1.02133	1.01034	1.03671	1.03362	1.03695	1.05906	1.03408	1.03249	1.01676	1.01228	1.04178	1.01718	1.0077	1.01983	1.03242	1.0238	1.02439	1.03288	1.02507	1.03493	1.01046	1.00861	1.03271	1.05056	1.01263	1.03241	1.03376	1.02662	1.02529	1.02446	1.00326	1.00981	1.0143	1.00292	1.0104	1.00742
	1.30301	0.799885	0.806073	0.800631	0.811572	0.945202	0.972491	0.982148	0.988404	0.987767	1.00911	1.01536	1.03236	1.0161	0.994881	1.025	1.01607	1.03393	1.03638	1.02761	1.03392	1.03485	1.01436	1.03225	1.03099	1.04073	1.04095	1.03205	1.01811	1.0268	1.02619	1.04704	1.03096	1.02488	1.01613	1.0251	1.03182	1.01369	1.03339	1.02062	1.0244	1.0062	1.03389	1.01217	1.02839	0.995714	1.00916	1.02505	1.01537
	1.3029	0.817883	0.800294	0.796174	0.795388	0.945003	0.993047	0.999477	1.00483	1.01882	1.00933	1.02331	1.02179	1.00716	1.02033	1.04036	1.02233	1.02955	1.02761	1.04465	1.01969	1.02875	1.04286	1.03603	1.02856	1.02493	1.03406	1.02162	1.04433	1.01708	1.02871	1.02086	1.02415	1.02273	1.03085	1.01233	1.03416	1.03345	1.02423	1.0185	1.03222	1.04692	1.04407	1.00208	0.996312	0.99572	0.996085	1.01635	0.998163
	1.3028	0.815188	0.82092	0.801618	0.808799	0.978304	0.989762	1.01948	0.979024	0.988492	1.00806	1.02506	1.00728	1.01408	1.01403	1.0255	1.0309	1.02856	1.01665	1.04131	1.03025	1.03525	1.02586	1.03434	1.01151	1.02998	1.03152	1.01163	1.02015	1.00859	1.03317	1.02675	1.03857	1.03704	1.03579	1.01677	1.02736	1.02728	1.04751	1.0347	1.03543	1.02713	1.0317	1.0075	1.02493	0.994905	1.01062	1.0243	0.999422
	1.30269	0.839509	0.823594	0.824461	0.821801	0.959691	0.981251	1.00506	0.997729	1.01339	1.00959	1.01426	1.04486	1.01476	1.01567	1.02549	1.03321	1.01529	1.01518	1.02133	1.02063	1.01871	1.02179	1.02744	1.02283	1.0134	1.03219	1.02687	1.02995	1.02546	1.02744	1.04599	1.01398	1.05145	1.03376	1.02066	1.03522	1.03194	1.03464	1.03944	1.03167	1.02067	1.02313	0.99974	1.01821	1.00379	1.01545	1.02304	1.00592
	1.30259	0.85063	0.851915	0.852946	0.852527	0.960059	0.996519	1.01009	0.985444	1.0121	1.01811	1.012	1.01439	1.01147	1.02842	1.04181	1.02955	1.02931	1.03893	1.03252	1.02659	1.0225	1.03501	1.03568	1.00674	1.02079	1.0272	1.02589	1.03227	1.03517	1.02611	1.03047	1.03781	1.03341	1.03741	1.01352	1.01489	1.03275	1.00545	1.03297	1.02774	0.996884	1.02636	1.0142	1.0247	1.0155	1.00953	1.02902	0.992948
	1.30248	0.87703	0.868114	0.864736	0.866759	0.976021	1.01146	1.00712	0.99402	0.995821	0.999106	1.01751	1.00603	1.02018	0.995741	1.00326	1.0282	1.01762	1.02863	1.02364	1.02593	1.02599	1.0062	1.03789	1.03316	1.01621	1.03548	1.03078	1.02484	1.02034	1.03264	1.01519	1.04388	1.03719	1.0353	1.02465	1.04013	1.03036	1.02108	1.02274	1.02145	1.01434	1.02326	1.00839	1.01852	1.00158	1.02847	1.02192	1.03777
	1.30238	0.896324	0.8786	0.88355	0.881825	0.983292	0.989263	0.999543	0.987043	1.02812	1.01815	1.01666	1.02801	1.00602	1.01745	1.02175	1.02956	1.04091	1.02722	1.05379	1.02074	1.02026	1.02337	1.03731	1.03528	1.01314	1.01016	1.01588	1.03681	1.03234	1.02584	1.0404	1.02962	1.02134	1.03609	1.03656	1.0347	1.02329	1.04203	1.03232	1.039	1.01374	1.02016	0.997403	1.00849	1.01472	1.01931	1.02213	1.01393
	1.30228	0.914209	0.906322	0.904533	0.908681	0.961575	0.98821	1.0223	0.994355	1.00574	0.995542	1.02511	1.00651	1.02577	1.01237	1.03613	1.01856	1.02592	1.02878	1.01477	1.0238	1.0333	1.02548	1.04034	1.02914	1.02275	1.02914	1.01951	1.03307	1.00711	1.02245	1.04188	1.03421	1.03204	1.02118	1.04024	1.05739	1.02728	1.02566	1.02463	1.03109	1.01793	1.02581	1.00655	1.01094	1.0175	1.0075	1.02344	1.00325
	1.30217	0.925834	0.931882	0.921147	0.912745	0.978187	1.00344	1.01433	1.00353	1.01222	1.01822	0.998844	1.01148	1.01351	1.00206	1.00241	1.02449	1.0147	1.04179	1.02674	1.02011	1.02021	1.03263	1.02761	1.02435	1.02056	1.03368	1.02122	1.04147	1.01887	1.02602	1.04184	1.04574	1.02537	1.03047	1.02576	1.0362	1.02959	1.00484	1.03955	1.02491	1.02341	1.03287	1.01446	1.02272	1.00911	1.00572	1.03486	1.00542
	1.30207	0.939758	0.936198	0.948512	0.932928	0.980718	0.99698	1.01243	0.984755	1.01831	0.995128	1.0251	1.01866	1.0135	1.00084	1.03654	1.02338	1.02535	1.03282	1.03823	1.0308	1.02605	1.01571	1.03059	1.02493	1.04116	1.03307	1.02354	1.02769	1.02259	1.04259	1.0285	1.02062	1.03053	1.03265	1.0128	1.03174	1.0203	1.03928	1.04759	1.03604	1.04416	1.01579	1.00237	1.03588	0.997592	1.01698	1.0272	1.01759
	1.30196	0.958367	0.943737	0.939022	0.935641	0.989966	1.00353	0.999534	1.00262	1.00159	1.00544	1.03167	1.01648	1.00336	1.02884	1.02315	1.02132	1.02307	1.02525	1.03747	1.02846	1.03785	1.02294	1.03674	1.02529	1.0289	1.03896	1.00476	1.02211	1.03842	1.02929	1.01544	1.01852	1.03218	1.03198	1.0344	1.03025	1.03979	1.02699	1.0388	1.0235	1.01409	1.01039	1.00345	1.02651	1.00023	0.996054	1.0135	1.01322
	1.30186	0.952359	0.95478	0.946653	0.949347	0.995733	1.00178	1.00648	1.0005	1.01014	1.01543	1.01319	1.02218	1.00222	1.0153	1.02063	1.02197	1.02087	1.02464	1.04032	1.03302	1.05013	1.03982	1.04066	1.00936	1.03923	1.02553	1.03246	1.02871	1.02054	1.01614	1.04404	1.02451	1.01737	1.03203	1.01969	1.04455	1.02258	1.03301	1.02853	1.02274	1.02578	1.02764	1.02184	1.00347	0.994767	1.0018	1.02513	0.995443
	1.30175	0.967752	0.959024	0.961853	0.954602	0.975158	0.993369	1.0112	0.998366	1.0038	1.00563	1.00888	1.0193	1.0103	1.02851	1.02448	1.01816	1.02757	1.03584	1.03443	1.02333	1.00664	1.02046	1.02688	1.01572	1.02326	1.02491	1.02821	1.03179	1.02285	1.02271	1.03528	1.02391	1.01825	1.01803	1.02304	1.03277	1.02804	1.01532	1.02389	1.0386	1.02197	1.023	1.00677	1.01902	0.995492	1.01375	1.0268	0.994731
	1.30165	0.958931	0.968868	0.977509	0.9485	0.98395	0.986807	1.00573	1.00001	1.0207	1.02102	1.01087	1.02559	1.01227	1.03769	1.04409	1.03614	1.02543	1.04058	1.03078	1.03007	1.02339	1.01574	1.03812	1.01412	1.01836	1.00413	1.02213	1.01535	1.01985	1.03077	1.03306	1.02685	1.02032	1.0342	1.01861	1.04124	1.03266	1.02892	1.02723	1.0276	1.04338	1.02392	1.0085	1.02075	1.00101	1.00316	1.02892	1.01253
	1.30154	0.983194	0.971444	0.978584	0.966225	0.992433	1.0018	1.02061	0.992929	0.994138	1.0169	1.00722	1.02356	1.03699	1.02395	1.03034	1.02215	1.02998	1.02335	1.01603	1.03238	1.04071	1.04003	1.0353	1.01696	1.02262	1.02817	1.0287	1.02582	1.03188	1.02568	1.02501	1.02385	1.00852	1.0399	1.02324	1.02672	1.03655	1.03362	1.02406	0.998516	1.02132	1.02161	1.00685	1.01639	1.00333	1.01992	1.0115	0.991612
	1.30144	0.998121	0.972271	0.964814	0.980358	0.977222	0.994635	1.00508	1.01477	1.01604	1.02478	1.03031	1.01429	1.03416	1.01444	1.03225	1.02998	1.02927	1.03013	1.03163	1.02273	1.02701	1.02004	1.03939	1.0139	1.00632	1.02823	1.00561	1.02898	1.01714	1.02234	1.02509	1.02399	1.01272	1.03152	1.01524	1.02834	1.03571	1.02368	1.02598	1.03312	1.02387	1.03099	1.01965	1.02607	0.999741	1.01046	1.02628	1.0047
	1.30133	0.994837	0.982702	0.972365	0.993978	0.98911	1.00265	1.01828	0.990039	1.02594	1.01694	1.03289	1.01499	1.04069	1.02948	1.03103	1.02933	1.0435	1.01772	1.03986	1.02796	1.03206	1.00845	1.03455	1.01603	1.0321	1.01464	1.01735	1.00942	1.01297	1.03908	1.03459	1.02262	1.00984	1.03571	1.01988	1.02692	1.02962	1.03372	1.0259	1.03318	1.03708	1.04256	1.0165	1.00897	1.0154	1.00728	1.02566	1.00092
	1.30123	0.97261	0.987622	0.973616	0.997785	0.988664	1.01923	1.01553	1.00504	1.00893	1.01627	1.02497	1.01852	1.02528	1.00598	1.02526	1.04111	1.0408	1.02874	1.01703	1.03321	1.03849	1.02912	1.03036	1.0199	1.02748	1.0404	1.02721	1.03723	1.02897	1.01939	1.0266	1.02256	1.01929	1.03918	1.01603	1.00979	1.0174	1.03376	1.01502	1.01269	1.02549	1.00983	1.01256	1.03627	1.01415	1.00318	1.03077	0.991229
	1.30113	0.98488	0.983411	0.984598	0.978247	0.989202	0.999682	1.00091	0.992008	1.00544	1.03371	1.02602	1.0248	1.03037	1.03096	1.02527	1.01974	1.03	1.01294	1.02665	1.04044	1.02506	1.04502	1.03438	1.03291	1.03365	1.0221	1.00853	1.03437	1.02684	1.01708	1.03024	1.03004	1.02972	1.042	1.01824	1.03393	1.01502	1.03897	1.02489	1.03897	1.03645	1.01573	1.00568	1.00834	1.00212	1.00753	1.01427	1.00288
	1.30102	0.985531	0.99135	0.986731	0.96492	0.994832	0.976718	1.01545	0.997978	1.00199	1.01703	1.01282	1.01215	1.02313	1.01166	1.03229	1.02694	1.02712	1.02086	1.03257	1.03102	1.0258	1.01927	1.03426	1.02436	1.02644	1.03659	1.0179	1.03349	1.03054	1.02885	1.01498	1.01874	1.02362	1.02528	1.04186	1.02855	1.02318	1.02942	1.0333	1.03197	1.01523	1.02816	1.00454	1.01348	1.02044	1.01701	1.01458	0.999066
	1.30092	0.997591	0.988355	0.983739	0.982554	0.993065	1.01073	1.00972	0.993523	1.01825	1.00114	1.03196	1.0115	1.00969	1.0197	1.01477	1.03255	1.01536	1.03639	1.02075	1.01928	1.02646	1.02449	1.02079	1.01287	1.02691	1.02023	1.03238	1.03195	1.02606	1.02526	1.02744	1.04392	1.02206	1.02519	1.01453	1.01478	1.0312	1.02077	1.03482	1.01637	1.01068	1.02738	1.00296	1.02312	0.98767	0.991937	1.0346	1.01239
	1.30081	0.964711	0.997927	0.980704	0.988145	0.978435	1.0089	1.02187	1.00217	1.0006	1.0164	1.02234	1.01704	1.02086	1.00616	1.02539	1.01476	1.00976	1.01528	1.0335	1.03071	1.0234	1.03156	1.01786	1.02795	1.03752	1.03948	1.01194	1.02492	1.02762	1.01067	1.02445	1.03632	1.03872	1.02806	1.02339	1.01888	1.0279	1.03373	1.0264	1.03304	1.0175	1.03494	1.01581	1.00525	1.00203	1.01991	1.02763	1.00359
	1.30071	0.986724	0.990333	0.99726	0.986524	0.997026	0.98749	1.02139	0.999986	1.00553	1.01509	1.02282	1.01773	1.00373	1.01146	1.0109	1.02744	1.0175	1.01743	1.02729	1.01135	1.0301	1.03606	1.01708	1.03715	1.02315	1.04649	1.0324	1.01983	1.03077	1.01174	1.04213	1.01674	1.03801	1.01978	1.01402	1.02024	1.04755	1.05337	1.01331	1.06094	1.01712	1.02232	1.01975	1.0396	1.00682	1.00714	1.0253	1.00315
	1.3006	1.00222	0.982472	0.990735	1.00112	0.990127	0.992813	1.01428	1.00728	0.999549	1.00541	1.02351	1.02148	1.02561	1.00845	1.02087	1.02004	1.00458	1.04311	1.03288	1.04345	1.0357	1.01292	1.01541	1.03422	1.02474	1.03921	1.01085	1.023	1.03246	1.02771	1.04815	1.02932	1.03732	1.02441	1.03853	1.05004	1.01933	1.01955	1.04246	1.03579	1.00674	1.02156	1.01229	1.02699	1.00956	1.00308	1.02612	1.01392
	1.3005	1.00434	0.982192	1.00178	1.00028	1.00753	0.99965	1.01281	1.0057	1.01864	1.00311	1.02115	1.01617	1.02364	1.02003	1.0168	1.02708	1.01825	1.02109	1.02456	0.997422	1.02534	1.01707	1.03387	1.02349	1.0372	1.02438	1.03516	1.02481	1.04997	1.029	1.03078	1.01022	1.03657	1.02258	1.01469	1.02019	1.02256	1.0133	1.02324	1.0343	1.03868	1.0258	1.0127	1.02725	1.00156	0.995768	1.0254	1.00991
	1.30039	1.00293	0.980895	1.00015	0.996999	0.989195	0.990699	1.02175	0.974938	1.00638	1.02925	1.00508	1.02717	1.03172	1.02407	1.00636	1.00963	1.01997	1.02773	1.03046	1.02046	1.02686	1.02475	1.01666	1.01535	1.03327	1.04108	1.04022	1.02529	1.01518	1.01308	1.02506	1.04894	1.02404	1.02944	1.02582	1.03872	1.0331	1.03617	1.03621	1.02813	1.02039	1.02212	0.993273	1.02487	0.985511	1.01446	1.00251	1.02158
	1.30029	0.997591	1.01267	0.991677	0.999545	0.993197	1.00893	1.01434	1.00143	1.00324	1.01057	1.00794	1.01046	1.00886	1.015	1.03157	1.02753	1.03308	1.02173	1.04187	1.01612	1.01016	1.01587	1.04637	1.00078	1.02304	1.02785	1.02104	1.02247	1.01994	1.02524	0.998818	1.03278	1.02451	1.03437	1.01075	1.01531	1.02947	1.03872	1.03616	1.00899	1.02049	1.02853	1.00496	1.01865	0.999179	1.012	1.02493	1.01317
	1.30019	0.978621	0.999935	1.00029	1.00706	0.995247	1.01381	1.00663	1.00462	1.00814	1.02209	1.01175	1.02441	1.02015	1.02302	1.03133	1.01201	1.02995	1.02157	1.02237	1.04096	1.03804	1.00576	1.04626	1.02586	1.03225	1.04377	1.00683	1.04091	1.03216	1.01483	1.04317	1.00994	1.02614	1.01956	1.01347	1.0041	1.04035	1.03694	1.02714	1.03372	1.00003	1.02229	0.994618	1.00723	1.01174	0.996253	1.00305	0.996178
	1.30008	1.01211	0.999772	0.988479	0.999711	0.99231	1.01608	1.01016	0.996759	1.00649	0.998602	1.02595	1.02889	1.03564	1.0273	1.0384	1.02738	1.02553	1.02605	1.0044	1.0222	1.04349	1.02885	1.03566	1.00776	1.02047	1.03618	1.03459	1.01689	1.02423	1.03382	1.04419	1.02845	1.03857	1.02801	1.01947	1.01233	1.03124	1.03343	1.03646	1.03277	1.01607	1.0261	1.00643	1.01221	1.00287	1.01701	1.00538	1.02072
	1.29998	1.00381	0.998688	0.973806	0.993279	1.0038	1.00607	1.02443	0.987538	1.00916	1.01906	1.0184	1.00196	1.02537	1.01696	1.02232	1.03345	1.03694	1.02795	1.02591	1.03043	1.00659	1.02545	1.02383	1.02651	1.03521	1.02281	1.0321	1.03481	1.01748	1.02979	1.01684	1.02342	1.04716	1.02661	1.01665	1.03918	1.02052	1.02055	1.03829	1.03865	1.03362	1.05008	1.00624	1.02109	1.00863	1.01027	1.00776	0.993709
	1.29987	1.00037	1.01688	0.993503	1.0017	0.987651	0.99662	1.04441	0.993024	1.00832	1.00768	1.01918	1.02024	1.01109	1.02059	1.01362	1.02942	1.03204	1.00993	1.02608	1.01413	1.02259	1.0324	1.01636	1.0226	1.01834	1.02695	1.02172	1.04517	1.02208	1.0155	1.02776	1.01038	1.01623	1.02754	1.03071	1.04173	1.02302	1.04055	1.01524	1.03197	1.03032	1.0206	0.99912	1.0281	1.01184	1.00506	1.01625	0.987048
	1.29977	0.993501	0.998585	1.00597	0.992409	1.00128	0.992019	1.01458	1.00559	0.996178	1.00698	1.02666	1.00977	1.00517	1.01576	1.02858	1.01274	1.01773	1.00128	1.02992	1.01586	1.02069	1.01207	1.01987	1.02697	1.04364	1.02105	1.03055	1.03266	1.02475	1.03359	1.0091	1.01983	1.0434	1.04498	1.0225	1.02274	1.0085	1.03918	1.02116	1.04924	1.02427	1.03317	1.01475	1.0274	0.994882	1.00768	1.01448	0.99916
	1.29967	0.996183	1.01406	1.00173	1.01724	1.00432	1.00006	1.034	0.99197	0.998337	1.01388	1.01027	1.01174	1.01148	1.02283	1.03519	1.02508	1.01121	1.03995	1.03089	1.01609	1.03439	1.02553	1.01544	1.02293	1.01104	1.00876	1.00528	1.04345	1.028	1.01025	1.01512	1.03041	1.03277	1.02603	1.01606	1.0575	1.02512	1.03047	1.00433	1.0331	1.01766	1.02286	1.00293	1.03623	1.0098	1.02046	1.03322	1.01065
	1.29956	1.0071	1.01309	0.99391	1.0054	1.00977	1.00645	1.00721	0.986756	1.0107	0.988718	1.04242	1.01274	1.0146	1.02419	1.02537	1.02204	1.02286	1.00172	1.01873	1.03004	1.01798	1.04777	1.03124	1.01436	1.02983	1.02921	1.01115	1.01858	1.03551	1.0319	1.02381	1.02378	1.01708	1.02006	1.03552	1.02849	1.0204	1.03046	1.01714	1.0425	1.03455	1.03356	1.00108	1.01493	0.979352	0.991999	1.02305	1.00453
	1.29946	1.01027	1.01133	1.00068	0.983077	0.989125	1.00672	1.03143	1.00602	1.01229	1.02334	1.01787	1.03279	1.02374	1.03097	1.02396	1.02925	1.01961	1.04833	1.03018	1.02853	1.04397	1.03264	1.01698	1.03503	1.02894	1.02154	1.02626	1.01846	1.01017	1.00911	1.03634	1.04098	1.02575	1.02065	1.01749	1.03496	1.02219	1.03417	1.0448	1.03705	1.03269	1.03552	1.00666	1.03621	1.00458	1.01993	1.04134	1.00434
	1.29935	1.00868	0.989744	1.00056	1.00148	1.00062	0.997165	1.01786	0.986733	0.990492	1.01967	1.03512	1.03	1.02433	1.00669	1.01221	1.02439	1.03998	1.02756	1.03446	1.02878	1.03216	1.02544	1.04325	1.01961	1.02599	1.02309	1.01601	1.04125	1.03266	1.02953	1.03958	1.01661	1.01174	1.03316	1.04269	1.03425	0.997149	1.02832	1.0313	1.02675	1.01688	1.03393	0.997435	1.02023	0.999258	1.011	1.01616	1.005
	1.29925	0.99329	1.01383	1.00637	1.00798	0.992228	1.00811	1.01246	0.99068	1.01599	0.997489	1.02129	1.00577	1.00514	1.03204	1.02557	1.02153	1.02044	1.0257	1.02352	1.03185	1.02338	1.02518	1.01285	1.01458	1.03725	1.04053	1.03422	1.04719	1.01108	1.02927	1.02601	1.01979	1.02764	1.04035	1.02337	1.01689	1.03732	1.04174	1.01024	1.04487	1.0346	1.02318	0.9938	1.00492	1.00209	1.02118	1.00935	1.01948
	1.29914	1.00646	1.01243	1.02287	1.00178	1.00433	0.99846	1.01792	0.985393	1.00316	1.01581	1.01404	1.01842	1.0245	1.01325	1.0193	1.00858	1.0234	1.01954	1.05277	1.0195	1.03906	1.0229	1.0377	1.01836	1.02279	1.00999	1.02598	1.0174	1.02604	1.03374	1.0308	1.04254	1.02332	1.01146	1.01596	1.03566	1.02118	1.02713	1.02043	1.00728	1.02936	1.01564	0.996912	1.01845	1.01267	1.01131	1.00835	0.982429
	1.29904	1.00662	1.00724	1.02079	0.982694	0.978921	0.995573	1.00368	0.997028	1.00212	1.00935	1.02057	1.01942	1.044	1.02231	1.02254	1.05432	1.01634	1.02243	1.01569	1.02745	1.03253	1.01699	1.04194	1.03426	1.03771	1.02298	1.02109	1.02819	1.01902	1.03063	1.01893	1.02423	1.03633	1.02776	1.01898	1.00702	1.02521	1.03863	1.01154	1.02139	1.01765	1.0292	1.01763	1.02022	1.01306	1.00928	1.03877	1.00514
	1.29894	0.995923	0.998347	1.01971	0.997074	0.996977	0.996403	0.996236	1.00678	0.979825	0.994661	1.00831	1.01278	1.03142	1.00651	1.02341	1.01761	1.02557	1.02461	1.04214	0.998649	1.03936	1.02853	1.02776	1.02346	1.03232	1.02319	1.02342	1.02743	1.02212	1.00929	1.0153	1.03349	1.02247	1.02117	1.02319	1.04846	1.03249	1.0335	1.02342	1.02675	1.00218	1.01886	0.997874	1.0203	1.01575	1.01665	1.0311	1.02257
	1.29883	1.00303	1.01471	1.0089	1.00206	0.992635	1.01406	0.999922	1.01516	1.01374	1.01124	1.02152	1.02631	1.00051	1.02477	1.03127	1.03863	1.00537	1.02766	1.05249	1.01051	1.03552	1.03423	1.01853	1.02342	1.01897	1.02234	1.03086	1.03033	1.02002	1.03079	1.03397	1.01941	1.01927	1.03528	1.02738	1.03278	1.01374	1.03805	1.02643	1.03098	1.0094	1.04844	1.00071	1.0246	1.01401	1.0151	1.02105	1.02756
	1.29873	1.00582	1.0035	1.00614	0.992123	1.01338	1.01492	1.01815	0.984126	1.0089	1.01413	1.02233	1.00772	1.01912	0.989014	1.01142	1.03529	1.02882	1.04194	1.01195	1.00453	1.04145	1.01177	1.02968	0.998451	1.00581	1.03779	1.01744	1.02846	1.02918	1.02792	1.02703	1.02746	1.02944	1.05038	1.0255	1.01539	1.01796	1.03526	1.04992	1.01749	1.02622	1.0242	1.01971	1.02198	1.00732	0.986159	1.0308	1.00907
	1.29863	0.993917	0.998039	1.00809	1.01232	0.968545	0.996841	1.00087	0.995834	1.00025	1.00936	1.04152	1.02431	1.02392	0.994974	1.01574	1.04147	1.02371	1.04409	1.03412	1.01759	1.02388	1.02315	1.02975	1.03466	1.03511	1.0327	1.01555	1.04778	1.03828	1.02888	1.02806	1.02047	1.02349	1.02039	1.03795	1.01953	1.02624	1.02238	1.00228	1.04807	1.02321	1.03263	1.01431	1.01542	0.987065	1.01266	1.01887	1.00819
	1.29852	1.03091	0.998829	1.00071	0.989511	0.993406	0.997333	1.02095	0.993503	1.02548	1.01897	1.00308	1.01937	1.01163	1.01986	1.02525	1.03434	1.04337	1.02887	1.02206	1.02569	1.03267	1.01313	1.03525	1.01465	1.01733	1.02594	1.02251	1.01866	1.01845	1.02116	1.03103	1.03662	1.01959	1.02419	1.01523	1.03829	1.02932	1.03455	1.04898	1.01127	1.00939	1.04659	1.01614	1.04232	1.00963	1.01938	1.03458	1.02738
	1.29842	0.993897	1.02389	0.988834	1.01418	0.989203	1.00329	1.00087	1.00966	1.01657	1.00955	1.01883	1.01271	1.02006	1.01371	1.04229	1.03249	1.04894	1.02402	1.04315	1.02475	1.03169	1.02445	1.02411	1.03401	1.03991	1.02039	1.01969	1.03069	1.02049	1.03218	1.03597	1.02568	1.01893	1.0141	1.04014	1.04043	1.02935	1.04066	1.01298	1.05476	1.02642	1.0317	1.01285	1.02602	0.999589	1.01889	1.01804	0.986698
	1.29831	1.00853	1.01645	0.995335	1.00322	0.984998	1.00181	1.01464	1.00119	1.02336	1.00497	1.03536	1.01274	1.02568	1.01244	1.03968	1.03133	1.02781	1.03607	1.02332	1.03572	1.02694	1.02813	1.0305	1.01787	1.03105	1.03118	1.02147	1.02684	1.02637	1.02832	1.03111	1.03166	1.02482	1.02052	1.0435	1.01758	1.01268	1.05145	1.02655	1.04175	1.03491	1.03494	1.02852	1.01611	0.996499	1.01441	1.03884	1.00187
	1.29821	1.01585	1.00545	0.993809	1.00149	0.99015	1.0052	1.00918	0.996562	1.00059	1.01427	1.04012	1.01359	1.02501	0.992243	1.02445	1.02646	1.02389	1.02094	1.02224	1.01182	1.03656	1.03006	1.05118	1.03867	1.01682	1.02693	1.02532	1.03876	1.02739	1.0332	1.02526	1.04182	1.01295	1.02524	1.02901	1.03218	1.03865	1.02841	1.04454	1.01905	1.03074	1.00523	1.03031	1.02032	0.997811	1.0179	1.0038	1.01741
	1.29811	0.986913	1.01001	0.994737	1.00966	1.00653	1.00682	1.01123	0.997843	1.01675	1.00771	1.01927	0.999466	1.02304	1.00573	1.02617	1.01801	1.03431	1.01819	1.03641	1.02186	1.03566	1.01996	1.02232	1.01423	1.0159	1.02776	1.01803	1.04082	1.03335	1.02751	1.03599	1.00938	1.03181	1.02557	1.03216	1.05809	1.03825	1.03751	1.02654	1.02261	1.01816	1.00455	1.01355	1.01279	1.00482	1.01245	1.0199	1.00165
	1.298	1.00952	1.00728	1.0056	1.01057	0.980385	1.01428	1.00467	1.00362	1.00142	1.01336	1.0052	1.00966	1.00986	1.01625	1.02283	1.04167	1.02094	1.01822	1.04366	1.02595	1.02701	1.01816	1.02049	1.01359	0.990575	1.03549	1.02722	1.02137	1.03433	1.03634	1.01794	1.0386	1.04447	1.02404	1.02286	1.03424	1.01047	1.02054	1.0433	1.03347	1.02172	1.01767	1.00782	1.01337	1.01289	1.01509	1.01673	1.0084
	1.2979	1.00309	1.00542	0.994553	1.02657	0.992827	1.00511	1.01228	1.00908	1.01701	1.03937	1.01257	1.01636	1.02477	1.01545	1.03923	1.01464	1.05514	1.02639	1.03347	1.04796	1.03649	1.01154	1.03497	1.01444	1.01222	1.02309	1.01575	1.01828	1.04944	1.0093	1.02564	1.02621	1.01479	1.02871	1.00778	1.03522	1.02853	1.04076	1.01894	1.04592	1.04191	1.0282	1.00492	1.02785	1.01645	0.996359	1.02218	1.01626
	1.29779	1.00219	1.01284	0.986772	0.991652	1.01017	1.00038	1.02106	0.99215	1.01377	1.00709	1.00961	1.01083	1.01994	1.02297	1.03527	1.03997	1.01645	1.02199	0.999528	1.0279	1.01948	1.00172	1.02582	1.0282	1.03368	1.0223	1.02814	1.03551	1.01919	1.03335	1.03191	1.0327	1.02458	1.02731	1.02704	1.04251	1.02223	1.02562	1.0148	1.02255	1.01872	1.03196	1.00012	1.00926	1.00372	1.01639	1.01898	1.00474
	1.29769	1.01422	1.01165	1.01991	1.00207	0.994945	0.980292	1.0128	1.01245	0.994304	1.00087	1.02992	1.03808	1.02476	1.00728	1.04855	1.02692	1.02389	1.02349	1.02654	1.0164	1.01348	1.0308	1.0241	1.01699	1.0414	1.03106	1.0447	1.02912	1.02958	1.03282	1.02859	1.04451	1.03024	1.03861	1.03075	1.0601	1.04016	1.03673	1.02628	1.02819	1.02117	1.01709	0.996041	1.01248	0.998281	1.00968	1.03624	1.00792
	1.29759	1.00154	1.02334	1.01928	1.00667	1.00854	1.01307	1.00007	1.01748	1.0114	1.00171	1.00294	1.00765	1.01499	1.0211	1.02382	1.01573	1.04198	1.039	1.02862	1.03203	1.0414	1.04341	1.03253	1.02512	1.04992	1.02918	1.01339	1.03116	1.02962	1.02692	1.03254	1.0311	1.01646	1.02371	1.02929	1.03755	1.01977	1.02406	1.05827	1.03347	1.0346	1.02216	1.01892	1.02041	1.00767	1.01217	1.02287	1.01247
	1.29748	1.02456	1.00062	0.996057	0.989788	1.00113	0.998259	1.00475	1.00267	1.01057	1.01763	1.01996	1.00695	1.00819	1.01578	1.03021	1.02514	1.02385	1.01843	1.03368	1.0246	1.03646	1.03491	1.04208	1.0213	1.02437	1.02399	1.02198	1.03061	1.02263	1.04025	1.03715	1.02955	1.02844	1.03823	1.02426	1.03735	1.03744	1.02319	1.0397	1.02951	1.0277	1.02742	1.00737	1.03801	1.01391	1.00842	1.03807	1.00376
	1.29738	1.00826	0.995086	0.999484	1.00127	1.00433	1.00867	1.01603	1.0027	1.02218	1.0069	1.01873	1.02266	1.02032	1.02848	1.04313	1.02091	1.03347	1.02596	1.02664	1.01613	1.0147	1.01831	1.04146	1.01415	1.01936	1.04289	1.01951	1.02689	1.03507	1.01608	1.03555	1.03659	1.02476	1.03198	1.01527	1.02536	1.0349	1.02375	1.02836	1.0215	1.01905	1.0373	1.0169	1.01055	1.00457	1.00759	1.01649	0.989796
	1.29728	1.00526	1.00965	1.00915	1.00855	0.989121	1.01594	1.01655	0.993143	1.01986	1.01594	1.03088	1.02453	1.02803	1.02452	1.02776	1.04067	1.04236	1.02619	1.04446	1.00031	1.02674	1.0266	1.04063	1.02156	1.04946	1.03303	1.04021	1.0224	1.0195	1.03453	1.02381	1.0386	1.02394	1.04496	1.01625	1.03726	1.05123	1.02852	1.02621	1.04703	1.02383	1.02553	1.00373	1.01972	0.998032	1.01599	1.00335	1.00595
	1.29717	0.998314	1.01662	1.00577	1.00106	0.990523	1.02485	1.01677	1.00287	0.993734	1.04107	1.04958	1.01932	1.02141	1.01864	1.02149	1.02475	1.02533	1.03446	1.02074	1.02493	1.01461	1.02426	1.028	1.02543	1.04791	1.0185	1.01164	1.02923	1.03694	1.02692	1.01905	1.04071	1.0378	1.03084	1.02267	1.02927	1.0282	1.03808	1.03164	1.02248	1.03123	1.02927	1.00789	1.02999	1.00054	1.00827	1.01769	1.01726
	1.29707	1.01873	1.00892	0.98974	1.01611	0.98165	1.00687	1.01175	1.0045	1.00072	1.01592	1.0245	1.00704	1.012	1.01568	1.03611	1.01257	1.01815	1.03657	1.01975	1.03641	1.00305	1.02403	1.02079	1.03183	1.0245	1.02613	1.03421	1.02753	1.03683	1.02114	1.03997	1.04195	1.00724	1.03225	1.02292	1.02864	1.03481	1.03047	1.01526	1.02326	1.02976	1.01697	1.02133	1.0036	1.0008	0.998003	1.02203	1.00927
	1.29696	1.0139	1.00825	0.996686	1.00739	0.994845	1.0184	1.0215	0.99206	1.00826	0.987666	1.03822	1.02345	1.02469	1.01282	1.02888	1.04405	1.03688	1.03311	1.04538	1.03003	1.03593	1.01689	1.03045	1.02367	1.01539	1.03923	1.02545	1.01425	1.01745	1.03836	1.04204	1.02512	1.01435	1.03939	1.02379	1.02945	1.04658	1.02627	1.0346	1.03073	1.02398	1.02797	1.01361	1.00748	1.0059	1.01211	1.02987	1.01061
	1.29686	1.00045	1.0028	1.00806	1.00937	1.00286	1.00092	1.01235	0.994603	1.01587	1.01191	1.02104	1.03303	1.01404	1.01502	1.02645	1.03403	1.03478	1.02892	1.03759	1.02794	1.01851	1.02286	1.04273	1.01933	1.00805	1.0227	1.00128	1.0291	1.0292	1.03703	1.03106	1.01977	1.03444	1.033	1.01171	1.04996	1.01255	1.02336	1.0281	1.03447	1.0133	1.03167	1.00677	1.01024	1.01267	1.02132	1.01652	0.993567
	1.29676	1.00187	1.00305	0.995863	1.01658	1.00654	1.02131	1.01598	1.01001	1.01234	1.0107	1.01776	1.0132	1.02932	1.01573	1.03295	1.02775	1.05357	1.02414	1.0167	1.04928	1.02988	1.01925	1.0381	1.02767	1.02673	1.03572	1.03215	1.02289	1.03611	1.02965	1.02104	1.03146	1.02294	1.00948	1.02898	1.02173	1.03841	1.037	1.03698	1.01792	1.02785	1.02886	1.01909	1.01919	0.999741	1.00709	1.04439	1.00478
	1.29665	1.00317	1.01609	1.02333	0.999242	0.982017	0.995247	1.01399	1.0133	0.999054	1.00817	1.04453	1.01914	1.01741	1.03625	1.02703	1.02422	1.03198	1.02906	1.0405	1.03295	1.01853	1.02106	1.0318	1.02382	1.01921	1.02333	1.02796	1.02919	1.02311	1.00837	1.03655	1.02049	1.03661	1.0299	1.02681	1.01612	1.04579	1.02344	1.01992	1.01556	1.04264	1.02891	1.00691	1.01989	1.01011	1.01322	1.00436	1.026
	1.29655	0.990982	1.00632	1.00438	1.02122	0.978555	1.00274	1.01672	1.00552	0.999038	1.01867	1.03073	1.00527	1.02542	1.00705	1.03722	1.02969	1.05091	1.02702	1.03136	1.02319	1.03127	1.02638	1.03179	1.03412	1.02552	1.01474	1.0138	1.01625	1.03966	1.02307	1.01243	1.02118	1.02035	1.03058	1.01044	1.02181	1.02034	1.02827	1.02366	1.023	1.01679	1.01534	1.00915	1.00747	0.996608	1.02158	1.02422	1.00791
	1.29645	1.00382	1.00891	1.02001	0.995033	0.998015	1.01322	1.0015	1.00693	1.02053	1.01473	1.02402	1.01248	1.02011	1.0285	1.04365	1.02374	1.01633	1.02645	1.01956	1.03238	1.03867	1.04912	1.04296	1.02101	1.03253	1.0282	1.023	1.05301	1.02868	1.02508	1.04194	1.02538	1.01695	1.03187	1.02363	1.04274	1.03546	1.03121	1.03121	1.0225	1.03024	1.01005	1.01323	1.01083	1.0143	1.014	1.02187	1.01122
	1.29634	0.996825	1.0115	1.01426	1.00252	1.01133	1.00808	0.999521	1.00346	1.01187	1.01611	1.01476	1.0077	1.0141	1.02072	1.02419	1.02806	1.03749	1.0386	1.01359	1.02963	1.0382	1.02576	1.02937	1.0208	1.01812	1.0461	1.005	1.03057	1.03699	1.02312	1.03399	1.01379	1.02243	1.03256	1.0228	1.03498	1.03041	1.03801	1.01924	1.04363	1.04716	1.03058	1.02594	1.02002	1.01265	1.01808	1.01176	1.01388
	1.29624	1.00835	1.02054	1.02547	1.00577	0.994032	1.00353	1.01546	1.01488	1.02188	1.01679	1.03465	1.01372	1.0155	1.02967	1.04097	1.01607	1.0367	1.05081	1.02161	1.03747	1.03408	1.03632	1.03449	1.03621	1.03806	1.02354	1.01529	1.03553	1.03781	1.02575	1.03131	1.03161	1.01073	1.02611	1.03298	1.03582	1.02529	1.03025	1.03624	1.03047	1.03606	1.02549	1.00629	1.01482	0.990862	1.0183	1.05468	1.00979
	1.29614	1.00902	1.00376	0.992964	0.99677	0.996661	0.986517	1.01887	1.00619	1.00315	1.00819	1.01776	1.01978	1.01892	1.02201	1.02785	1.02574	1.03688	1.01794	1.03439	1.03191	1.04098	1.02322	1.03204	1.0279	1.04127	1.03296	1.02618	1.01747	1.04844	1.01963	1.04024	1.03026	1.01947	1.02998	1.02717	1.02174	1.02515	1.03461	1.01871	1.03576	1.02927	1.03516	1.01454	1.0293	1.02301	1.00968	1.03008	1.0098
	1.29603	1.01751	1.00436	1.0125	0.998598	1.00251	1.00919	1.0129	1.00929	1.01064	1.01821	1.01574	1.01502	1.01619	1.02005	1.03271	1.02704	1.01112	1.02438	1.0484	1.02839	1.0259	1.01663	1.04148	1.02453	1.0221	1.02936	1.02494	1.05076	1.02665	1.03031	1.01689	1.04252	1.02397	1.03331	1.03084	1.03837	1.03814	1.02133	1.02683	1.019	1.02163	1.03754	1.02835	1.03578	1.01514	1.00355	1.02557	1.01251
	1.29593	0.994857	1.01089	1.00927	0.999989	1.00129	1.01161	1.01285	1.01439	0.994518	1.01354	1.03214	1.00557	1.02031	1.01414	1.0255	1.02042	1.02952	1.04545	1.0189	1.0378	1.03007	1.03461	1.01388	1.02998	1.02354	1.02708	1.02519	1.02857	1.01361	1.03676	1.02249	1.02464	1.01463	1.0274	1.01556	1.02415	1.02966	1.01407	1.02553	1.04049	1.03237	1.02853	1.02016	1.01908	1.01316	1.00969	1.03688	1.01388
	1.29583	1.01107	1.01557	1.00544	1.01986	0.998971	0.994437	1.01418	1.00906	1.01683	1.01758	1.01749	1.0245	0.997434	1.01449	1.01721	1.03194	1.04292	1.02819	1.016	1.04345	1.01393	1.04195	1.02874	1.03713	1.0072	1.0224	1.04441	1.02767	1.01269	1.01729	1.0343	1.01824	1.03407	1.02808	1.03556	1.02109	1.02354	1.02951	1.01568	1.02381	1.05408	1.00865	1.00724	0.999919	1.01634	0.997145	1.03524	1.00444
	1.29572	1.00258	1.02536	1.01461	1.01217	1.00338	0.989841	0.995461	0.995615	0.992337	1.01022	1.02278	1.00824	1.01079	1.02067	1.01421	1.02658	1.02601	1.01963	1.03388	1.03574	1.02334	1.01636	1.04053	1.02617	1.03567	1.01878	1.01221	1.02687	1.03823	1.03611	1.03641	1.02531	1.03557	1.02146	1.02215	1.03022	1.03657	1.03546	1.01553	1.03609	1.01948	1.02639	1.01628	1.03139	0.985583	1.01112	1.02303	0.99982
	1.29562	1.01117	1.00897	1.02074	1.01416	0.996079	1.0005	1.01875	0.993112	0.992255	1.0014	1.00995	1.02185	1.02527	1.01544	1.0293	1.0193	1.03865	1.02687	1.02154	1.0072	1.01995	1.01163	1.02956	1.01293	1.02481	1.02891	1.02888	1.02502	1.03891	1.03345	1.0288	1.03536	1.02292	1.0228	1.04015	1.03035	1.03266	1.02562	1.04848	1.01821	1.0538	1.0221	1.01042	1.01443	0.995915	1.0198	1.03977	1.00918
	1.29552	1.00658	1.01165	1.00148	1.00894	1.00905	1.02231	1.0131	0.988788	1.01993	1.01361	1.01787	1.01907	1.01355	1.0226	1.0154	1.02182	1.0202	1.04005	1.03253	1.04102	1.03224	1.02561	1.02623	1.0109	1.00527	1.03501	1.03658	1.04792	1.02055	1.03062	1.03092	1.04114	1.0264	1.03959	1.01878	1.02671	1.01779	1.02138	1.03406	1.02711	1.02341	1.03628	1.01379	1.01144	0.996838	1.01345	1.02793	1.01319
	1.29541	1.00593	1.0359	1.00013	1.00959	1.00292	1.00982	1.00557	1.00298	0.997234	0.996188	1.02364	1.02796	1.03071	1.02147	1.01491	1.03523	1.02247	1.02771	1.0326	1.02153	1.03365	1.03833	1.04147	1.01317	1.00057	1.02061	1.02165	1.01878	1.01996	1.04049	1.0449	1.0262	1.02019	1.03562	1.0344	1.04176	1.04083	1.02876	1.02893	1.037	1.03563	1.02668	1.01935	1.00971	1.00662	1.00816	1.02646	1.00975
	1.29531	1.00663	1.00495	1.00882	0.998323	0.995703	0.984331	1.00833	1.0097	1.0228	1.02119	1.01625	0.997804	1.0095	1.0154	1.01671	1.02192	1.01957	1.04517	1.03409	1.02949	1.01925	1.04174	1.03288	1.02598	1.01992	1.0357	1.01709	1.02213	1.04115	1.03564	1.02071	1.02411	1.01418	1.01912	1.02856	1.02391	1.02298	1.01961	1.02497	1.03705	1.02744	1.03567	1.01215	0.999492	0.999989	1.02698	1.03431	1.01796
	1.29521	1.00799	0.990316	1.0055	1.015	0.999471	0.999209	1.00289	1.01419	0.997095	1.01302	1.0355	1.01833	1.03463	1.02089	1.02514	1.01091	1.02405	1.03591	1.0096	1.02882	1.05318	1.01136	1.0403	1.04474	1.03332	1.02191	1.03444	1.01924	1.0242	1.0224	1.03664	1.01921	1.04793	1.03437	1.02777	1.0359	1.04273	1.0264	1.03245	1.02644	1.01112	1.01244	0.995348	1.01092	1.00169	0.999873	1.0163	1.0292
	1.2951	1.01952	1.01375	1.00416	1.01028	1.00185	1.01768	1.02296	1.00659	0.997146	1.01102	1.03093	1.00253	1.01778	1.02588	1.02821	1.01895	1.02855	1.04394	1.03202	1.02093	1.02617	1.02539	1.03483	1.01129	1.01563	1.02376	1.02571	1.01476	1.02841	1.0215	1.02343	1.02194	1.00747	1.02051	1.03391	1.01879	1.04478	1.02696	1.03716	1.02513	1.02509	1.01784	1.01176	1.01205	1.00785	1.00421	1.02372	1.0214
	1.295	1.00993	1.00701	1.00566	1.0004	0.99798	1.00822	1.00764	0.998746	0.998638	1.01716	1.02951	1.03297	1.01994	1.01552	1.01737	1.02146	1.02565	1.02938	1.03425	1.03265	1.0125	1.02329	1.02766	1.03367	1.01776	1.04821	1.01712	1.0365	1.01973	1.03349	1.04896	1.02252	1.01499	1.02565	1.02347	1.02993	1.01529	1.01723	1.03637	1.01753	1.03116	1.01867	1.0223	1.02881	1.02345	1.01083	1.02049	1.0091
	1.2949	1.00395	1.01378	1.00704	1.00965	0.999044	0.996353	1.02255	0.994819	1.00479	0.996789	1.02003	1.02328	1.02141	1.0178	1.03323	1.01715	1.0434	1.03243	1.03354	1.02605	1.03245	1.0402	1.021	1.03499	1.03312	1.01058	1.02402	1.03795	1.03502	1.05391	1.03477	1.03422	1.03802	1.02179	1.02805	1.01732	1.0168	1.02891	1.02042	1.04113	1.01896	1.0292	1.02286	1.02729	0.998275	1.0122	1.0287	1.02004
	1.29479	1.01822	1.01039	0.994193	1.01634	0.99278	1.00213	1.01499	0.99963	1.02113	1.01168	1.01737	1.03989	1.02435	1.01459	1.02466	1.03159	1.04055	1.034	1.02313	1.03277	1.03105	1.01099	1.02776	1.01841	1.01424	1.01357	1.03132	1.03658	1.03506	1.03152	1.03766	1.03131	1.02801	1.03321	1.02666	1.02066	1.03492	1.02095	1.03722	1.03666	1.03815	1.03752	1.02025	1.01437	1.01258	1.00973	1.01951	1.00841
	1.29469	1.00261	1.02007	1.00292	1.01236	0.998106	1.00801	1.02211	0.994168	0.997056	1.01732	1.01798	1.02684	1.03328	1.01372	1.03347	1.03415	1.00811	1.03105	1.02526	1.02087	1.01615	1.04312	1.01895	1.03376	1.02369	1.02216	1.02794	1.03212	1.03218	1.04736	1.03553	1.02628	1.02867	1.03324	1.03962	1.0448	1.01894	1.04662	1.0348	1.02984	1.03512	1.01953	1.01102	1.01967	1.00488	1.02804	1.01869	0.996004
	1.29459	1.00261	1.0111	0.9995	1.00832	0.994845	0.995977	1.01136	1.00286	1.01551	0.994469	1.0136	1.03552	1.0009	1.00812	1.02038	1.03358	1.03041	1.04674	1.02852	1.04479	1.02973	1.03769	1.04738	1.01381	1.02771	1.02989	1.01644	1.01244	1.03798	1.01492	1.0166	1.03066	1.0367	1.02649	1.00418	1.03482	1.03506	1.03902	1.04186	1.02689	1.03129	1.0127	1.01273	1.03058	1.00279	1.01606	1.01858	1.00439
	1.29448	0.992988	1.01118	1.00206	1.01653	1.00556	1.01728	1.01218	0.991721	0.990755	1.00334	1.02192	1.019	1.01581	1.00127	1.03287	1.03966	1.03659	1.04162	1.0323	1.02187	1.03467	1.04115	1.02508	1.02103	1.03664	1.02554	1.02417	1.00656	1.04043	1.03373	1.02068	1.01157	1.0345	1.03606	1.02902	1.03802	1.04753	1.02788	1.04109	1.01988	1.04068	1.02252	0.995228	1.01795	1.01241	1.01994	1.03533	1.01522
	1.29438	1.01802	1.01186	1.00989	1.00695	1.00264	0.997664	1.02044	1.00729	1.01848	0.994452	1.00777	1.02324	1.00939	1.02528	1.01377	1.02675	1.03293	1.03507	1.01528	1.03972	1.03828	1.01944	1.03399	1.02791	1.01754	1.03357	1.02208	1.02541	1.03381	1.02938	1.01	1.00674	1.03896	1.03201	1.02309	1.02577	1.03431	1.02671	1.03484	1.0269	1.03286	1.0151	1.01332	1.02355	1.01107	1.00818	1.02498	1.00502
	1.29428	1.0193	1.00838	1.01135	1.01311	1.00235	1.01731	1.00778	1.00052	0.993205	1.01671	1.03471	0.997183	1.02012	1.01724	1.02791	1.01194	1.01099	1.02837	1.03612	1.0397	1.03827	1.02293	1.02311	1.02228	1.01667	1.02312	1.03459	1.03228	1.03593	1.02815	1.03782	1.04694	1.02879	1.02317	1.0346	1.03504	1.04728	1.04961	1.03572	1.04088	1.01772	1.03035	1.00936	1.02058	1.01422	1.0052	1.0227	0.991894
	1.29417	1.02997	1.00213	0.991919	1.00833	1.00851	1.00317	1.02282	0.98807	1.01351	1.02446	1.02892	1.01258	1.0009	1.02106	1.03286	1.02059	1.02611	1.03068	1.02273	1.03389	1.02837	1.02913	1.04307	1.0342	1.03609	1.03241	1.01738	1.0464	1.02945	1.02889	1.01506	1.0234	1.045	1.02455	1.02249	1.01455	1.03354	1.02429	1.03881	1.01083	1.02434	1.01963	1.0159	1.0205	1.01326	1.00997	1.0187	0.992129
	1.29407	0.991757	1.01661	0.989139	1.00438	1.00541	1.01553	1.01005	0.998826	1.01357	1.02025	1.02402	1.02821	1.00497	1.03688	1.03359	1.01506	1.04187	1.02397	1.04379	1.02273	1.03269	1.04158	1.0306	1.02684	1.03672	1.02933	1.01796	1.02274	1.02005	1.02099	1.038	1.02933	1.04057	1.01961	1.01182	1.02439	1.02733	1.02617	1.02294	1.02246	1.02678	1.00459	1.0131	1.03545	1.02096	1.01707	1.02487	1.02289
	1.29397	1.02506	1.02027	1.0129	1.00696	0.993867	1.02175	1.00222	1.00027	0.992255	1.01681	1.02331	1.02326	1.01374	1.01184	1.02366	1.02194	1.0277	1.01511	1.03327	1.03322	1.03412	1.00142	1.03315	1.0166	1.01341	1.02879	1.01279	1.02859	1.02228	1.02177	1.02654	1.03967	1.026	1.03086	1.02725	1.03062	1.04296	1.0242	1.02315	1.04118	1.00841	1.02737	1.0224	1.0074	1.00998	1.00879	1.04111	1.01107
	1.29387	1.00613	0.995204	0.999142	1.00767	0.993342	0.988959	1.01739	1.00644	1.01377	1.01614	1.01789	1.01604	1.01366	1.00666	1.03567	1.03154	1.03184	1.04082	1.03944	1.02125	1.02986	1.00644	1.03287	1.01852	1.0265	1.02865	1.02558	1.03465	1.02092	1.03268	1.04018	1.02941	1.01502	1.03706	1.01204	1.03768	1.02114	1.02633	1.0365	1.03038	1.02453	1.0229	1.0072	1.01046	1.01655	1.00782	1.00912	1.02161
	1.29376	1.01621	1.00061	1.01372	1.01535	0.999831	0.998776	1.01452	1.01046	1.01965	1.01046	1.03048	1.00884	1.01953	1.02098	1.03128	1.03355	1.01564	1.02195	1.02667	1.02736	1.02141	1.01189	1.03612	1.0246	1.03164	1.03507	1.03125	1.03612	1.02306	1.0312	1.03305	1.0398	1.02817	1.02815	1.01003	1.03385	1.04066	1.01995	1.02854	1.01787	1.01964	1.0252	1.013	1.0229	1.0065	1.01675	1.02729	1.00758
	1.29366	0.995634	1.00486	1.01376	1.00481	0.997119	1.00568	1.00883	0.988408	1.01683	1.01907	1.03868	1.03746	1.02037	0.999495	1.02756	1.02986	1.03435	1.03176	1.01963	1.01747	1.04381	1.04273	1.04262	1.02612	1.02327	1.0338	1.02074	1.02182	1.02519	1.0561	1.03311	1.03165	1.03553	1.01929	1.02497	1.02378	1.02102	1.04022	1.0341	1.03518	1.0244	1.02363	1.01071	1.00917	1.02546	0.999495	1.03709	1.00555
	1.29356	1.00265	1.02012	1.02552	1.00762	0.999109	1.01111	1.01565	1.01434	0.993102	1.00821	1.03075	0.998468	1.01742	1.02899	1.03217	1.044	1.02568	1.04026	1.0109	1.04584	1.03426	1.01773	1.02733	1.01976	1.03281	1.03639	1.026	1.01373	1.03937	1.04361	1.0288	1.02716	1.02811	1.02191	1.02736	1.04901	1.01943	1.03715	1.03807	1.02812	1.0182	1.02297	1.02056	1.01525	1.01212	1.01587	1.03294	1.02096
	1.29345	1.01283	1.00988	1.00804	1.01044	0.994534	0.998859	1.00751	0.997391	1.0239	1.01036	1.0264	1.03948	1.03099	1.03424	1.02571	1.04343	1.03454	1.0319	1.03192	1.02138	1.04765	1.03228	1.03229	1.02088	1.04429	1.03834	1.03037	1.04143	1.03493	1.01497	1.01726	1.04146	1.02964	1.02266	1.02588	1.03171	1.02261	1.02639	1.02145	1.04893	1.01277	1.02149	1.01591	1.02252	1.00795	1.02033	1.0268	1.01105
	1.29335	1.02336	1.00917	1.01473	1.00971	1.00874	0.994734	1.00599	1.01842	0.99985	1.01333	1.02577	1.03107	1.02664	1.0187	1.03038	1.02221	1.02826	1.02719	1.03664	1.04167	1.02769	1.02592	1.02743	1.04562	1.0359	1.03971	1.03515	1.03219	1.03352	1.03167	1.03179	1.02089	1.02868	1.03802	1.02983	1.04698	1.03768	1.03364	1.02829	1.01616	1.02832	1.02119	1.01108	1.01831	1.00632	1.02155	1.01674	1.00816
	1.29325	1.01065	1.00477	0.982743	1.01482	1.00822	1.01376	1.01687	0.998184	1.02114	1.00728	1.0133	1.03693	1.01672	1.04518	1.02579	1.03586	1.02835	1.0392	1.0122	1.03308	1.03069	1.04849	1.03108	1.02374	1.02683	1.02922	1.04427	1.0209	1.03958	1.03187	1.03109	1.02038	1.04175	1.02755	1.01425	1.04301	1.04905	1.03686	1.02835	1.02278	1.03558	1.03645	1.01548	1.01589	1.01288	0.998377	1.01947	1.00374
	1.29314	1.01419	1.01501	1.01911	1.01547	1.00278	1.00749	1.0207	1.01283	1.01791	1.00464	1.01659	1.00846	1.04007	1.01602	1.04697	1.01838	1.04566	1.04401	1.03834	1.03953	1.01961	1.02885	1.03107	1.00252	1.03323	1.03721	1.04374	1.02538	1.03975	1.03185	1.03038	1.03025	1.02509	1.01144	1.03869	1.04307	1.0249	1.02799	1.02699	1.02601	1.02135	1.01999	1.0029	1.03222	1.02567	1.00704	1.03841	1.0146
	1.29304	1.00413	1.01065	0.998674	1.0134	1.01361	1.01254	1.01654	0.994617	0.999877	1.02086	1.03071	1.02797	1.00309	1.01005	1.01541	1.03831	1.03649	1.02658	1.01387	1.03478	1.039	1.04919	1.04466	1.0206	1.01102	1.02684	1.00803	1.02897	1.02436	1.03779	1.04411	1.02945	1.03721	1.02388	1.03559	1.02072	1.03204	1.02933	1.02436	1.01003	1.04379	1.02545	1.02643	1.02906	1.00671	1.01769	1.0256	1.00997
	1.29294	1.01512	0.983777	1.01122	1.00691	1.00968	1.0054	1.00884	0.994628	1.00675	1.0193	1.0197	1.02031	1.03779	1.01909	1.04267	1.03411	1.02599	1.03692	1.03222	1.02701	1.02221	1.03131	1.03152	1.02602	1.02837	1.03916	1.05103	1.03371	1.0314	1.03093	1.04587	1.03022	1.03571	1.04124	1.0191	1.03019	1.0338	1.03967	1.03629	1.04079	1.04574	1.02678	1.01006	1.00993	1.00843	1.02692	1.03584	1.00992
	1.29284	0.998996	1.00475	1.01423	1.01779	0.996496	1.02104	1.00819	1.01204	1.01125	1.01056	1.01751	1.02636	1.01911	1.02945	1.0331	1.0408	1.02445	1.02524	1.02365	1.03091	1.01906	1.02707	1.02821	1.02788	1.0425	1.02626	1.00751	1.02548	1.03144	1.02763	1.01638	1.02054	1.01969	1.03381	1.03134	1.02824	1.02867	1.03513	1.03165	1.03052	1.02934	1.02568	1.01016	1.02225	1.01261	1.00823	1.03351	1.0021
	1.29273	1.01314	0.996643	0.996498	1.0283	1.01359	1.01781	1.03624	1.01761	0.987177	1.0083	1.02651	1.01962	1.02881	1.02459	1.02332	1.03452	1.03813	1.04393	1.03043	1.01648	1.03621	1.03413	1.02253	1.0432	1.01207	1.04076	1.03158	1.0297	1.01211	1.04012	1.00919	1.05244	1.01526	1.02329	1.04387	1.02986	1.03774	1.02189	1.02686	1.04319	1.04006	1.03711	1.02217	1.01389	1.00917	1.02102	1.01453	1.01226
	1.29263	1.00044	1.00174	1.01285	1.01942	1.00754	0.999447	1.00473	1.00962	1.00673	1.01808	1.0281	1.0103	1.03135	1.02031	1.04115	1.04405	1.02819	1.0562	1.01703	1.0235	1.03154	1.02127	1.03516	1.03068	1.03674	1.02583	1.02446	1.0138	1.03152	1.04185	1.02711	1.03786	1.02937	1.02164	1.02751	1.0456	1.02585	1.01903	1.02194	1.04718	1.01046	1.02442	1.01959	1.03026	1.02465	1.01153	1.02805	1.0047
	1.29253	1.00734	1.00371	1.00266	1.00974	0.983518	1.0138	1.0127	1.01215	1.004	1.00576	1.01778	1.01742	1.02579	1.03129	1.01511	1.0188	1.01602	1.02188	1.02152	1.03338	1.03153	1.02878	1.04489	1.01783	1.0395	1.03141	1.03238	1.03725	1.0237	1.03067	1.01856	1.06331	1.03373	1.02382	1.02007	1.04388	1.04562	1.04213	1.02804	1.03419	1.02707	1.02525	1.0027	1.0012	0.997595	1.00927	1.02138	1.01742
	1.29242	1.01001	1.01011	0.985594	0.994649	1.02898	1.00442	1.00873	1.00324	1.01182	0.998651	1.00523	1.02622	1.01586	1.0231	1.0353	1.03031	1.04025	1.02864	1.0382	1.00878	1.02379	1.04408	1.03818	1.01372	1.01322	1.01928	1.05392	1.0241	1.04124	0.993631	1.02885	1.03441	1.02251	1.03053	1.03029	1.03163	1.03813	1.03654	1.03283	1.04585	1.02868	1.03554	1.00483	1.02413	1.0116	1.01869	1.03492	1.02778
	1.29232	1.00597	1.0153	1.01043	1.0055	1.00429	1.01363	1.00708	1.01129	1.02841	0.99055	1.03102	1.02199	1.01501	1.02136	1.03469	1.03849	1.0342	1.03425	1.03275	1.03711	1.03421	1.0299	1.02405	1.02525	1.02426	1.03917	1.0219	1.01706	1.03075	1.02019	1.0271	1.03801	1.02063	1.02774	1.04701	1.03155	1.05045	1.01441	1.01688	1.03528	1.03244	1.02496	1.00566	1.02349	1.02736	1.01969	1.0126	1.01384
	1.29222	0.997473	1.01898	1.00619	0.991022	1.00286	0.996251	1.01056	1.003	1.00382	0.99911	1.0121	1.02282	1.01588	1.00875	1.03724	1.03294	1.04424	1.03338	1.01515	1.02146	1.03428	1.02725	1.04911	1.05188	1.02643	1.03458	1.01399	1.02928	1.0213	1.03086	1.0417	1.0173	1.02299	1.04762	1.04447	1.02921	1.02937	1.02346	1.03503	1.05018	1.02462	1.00189	1.02146	1.01501	1.01639	0.999	1.02834	0.99425
	1.29212	1.00607	1.00164	0.99738	1.00032	0.993527	1.00531	1.00078	0.996038	0.996648	1.01765	1.01718	1.01741	1.01016	1.02447	1.04437	1.04013	1.03483	1.02068	1.04433	1.04768	1.01692	1.02685	1.04545	1.03635	1.00934	1.04106	1.02126	1.03191	1.02578	1.02547	1.02764	1.03363	1.02045	1.05202	1.03608	1.03447	1.04474	1.04849	1.03718	1.02458	1.02644	1.01652	1.00743	1.01108	1.0254	1.01651	1.03808	1.0168
	1.29201	1.01619	1.00578	0.994103	0.993633	0.996563	1.00395	1.01262	1.00756	0.994685	1.01592	0.990895	1.02198	1.01876	0.995004	1.04309	1.01715	1.03125	1.05223	1.02523	1.02594	1.03645	1.02651	1.01763	1.03323	1.02815	1.02931	1.03143	1.02097	1.03481	1.03102	1.03156	1.03469	1.02086	1.03749	1.01741	1.04787	1.02708	1.02106	1.02142	1.02661	1.04304	1.02169	1.03448	1.02571	1.00739	1.0302	1.02034	1.03812
	1.29191	1.01575	0.989732	0.998219	1.00954	1.00995	0.994678	1.01691	1.01617	0.995026	1.02822	1.00121	1.0099	1.00742	1.02867	1.05899	1.01865	1.03143	1.03241	1.03981	1.00529	1.01865	1.03487	1.05301	1.03964	1.02964	1.02486	1.04241	1.03559	1.02137	1.02772	1.01537	1.03893	1.04028	1.04365	1.03621	0.999324	1.05336	1.03576	1.02338	1.03555	1.02941	1.00509	1.00908	1.033	1.00387	1.01118	1.02683	1.03107
	1.29181	1.02453	1.02577	1.01808	0.997405	1.01818	1.02432	1.01056	1.00798	0.999505	1.02378	1.03584	1.02233	1.03785	1.02093	1.03509	1.04728	1.00967	1.05095	1.01869	1.01133	1.0447	1.03493	1.02318	1.03394	1.00593	1.03531	1.03446	1.04412	1.0114	1.03508	1.01069	1.0442	1.03509	1.01307	1.02193	1.03462	1.03494	1.03205	1.01917	1.03899	1.03294	1.02842	1.01661	1.04554	1.02895	1.01731	1.0141	1.00784
	1.29171	1.00154	1.02632	0.994914	1.00274	0.995356	1.01331	0.995775	1.02139	1.00023	1.02826	1.02867	1.01543	1.01677	1.02078	1.00109	1.02905	1.02277	1.03033	1.03672	1.05201	1.03472	1.02703	1.02806	1.03851	1.04643	1.03263	1.0296	1.01049	1.03293	1.04439	1.04005	1.02309	1.03085	1.0257	1.04644	1.0732	1.02384	1.0295	1.03039	1.01124	1.01724	1.03508	1.01579	1.01578	1.01141	1.02063	1.03786	1.02497
	1.2916	1.01333	0.990748	1.00333	1.02132	1.00577	1.00536	1.01854	1.00191	1.02955	1.01087	1.03811	1.01748	1.02209	1.01349	1.00929	1.0066	1.0307	1.00881	1.05426	1.03901	1.03782	1.02418	1.0212	1.03875	1.02542	1.02101	1.0359	1.02916	1.04048	1.02869	1.02234	1.01581	1.03195	1.03171	1.03089	1.03256	1.036	1.05305	1.03829	1.019	1.00894	1.03072	0.996897	1.02531	1.00533	1.01189	1.02402	1.01286
	1.2915	1.00551	1.02191	0.984044	1.01949	1.00325	1.00517	1.03674	0.995029	1.01368	1.01709	1.01077	1.02806	1.01895	1.0243	1.03023	1.0247	1.01737	1.02607	0.999304	1.03582	1.04498	1.05214	1.02714	1.02306	1.01981	1.02634	1.0333	1.03883	1.04703	1.02565	1.0214	1.01987	1.02996	1.03575	1.02454	1.05598	1.02488	1.023	1.01717	1.02591	1.02074	1.0061	1.0129	0.99844	1.00461	1.00097	1.00837	1.01679
	1.2914	1.00249	0.996369	0.999194	1.02354	1.0048	0.984621	1.0164	0.991998	1.00848	0.994019	1.01056	1.01433	1.03287	1.01726	1.03292	1.02018	1.03187	1.02516	1.02403	1.04883	1.03478	1.0128	1.03395	1.0244	1.04849	1.01028	0.997995	1.02825	1.04795	1.04987	1.0256	1.01283	1.02994	1.01699	1.02458	1.02388	1.01815	1.04434	1.03261	1.00585	1.02874	1.04757	1.01159	1.02608	1.00775	0.999543	1.00597	1.05488
	1.2913	0.996492	1.01661	1.03091	1.00647	1.00463	1.00882	1.01391	0.988719	1.03043	1.03652	1.01325	1.01436	1.01584	1.00809	1.02395	1.01583	1.03617	1.03713	1.0274	1.03151	1.02075	1.03149	1.03484	1.04289	1.02031	1.03996	1.03736	1.01054	1.00411	1.02702	1.03184	1.02447	1.02911	1.02104	1.03347	1.03836	1.04383	1.00964	1.04512	1.04046	1.02553	1.03866	1.03616	1.019	1.00781	1.01779	1.02922	1.02577
	1.29119	1.01348	0.992818	0.993778	1.00557	1.00547	1.00472	1.01283	1.01885	1.0126	1.00641	1.04255	1.02854	1.02528	1.00857	1.02839	1.02746	1.03833	1.03505	1.02856	1.02625	1.01595	1.03158	1.03959	1.00719	1.02614	1.0285	1.02798	1.01211	1.04351	1.01524	1.04216	1.02058	1.02737	1.0271	1.04018	1.0082	1.03939	1.03476	1.02476	1.0417	1.03209	1.0332	1.01316	1.00951	1.0093	0.989628	1.01821	1.0022
	1.29109	1.00353	1.02253	1.01662	1.02231	1.01875	0.999484	1.00573	1.01416	1.0016	1.02113	1.02525	1.00249	1.01383	1.01297	1.02406	1.03805	1.01434	1.02766	1.00122	1.02528	1.04783	1.02308	1.03096	1.03354	1.03172	1.03737	0.998963	1.03182	1.02495	1.03451	1.03799	1.03807	1.00022	1.02812	0.998564	1.04399	1.03045	1.02849	1.02386	1.0428	1.01915	1.02459	1.01153	1.0206	1.00598	1.02301	1.02374	1.00542
	1.29099	1.01928	1.0105	1.01565	0.99806	1.01298	1.01259	1.02164	0.98827	1.01775	1.0123	1.01946	1.03224	1.02527	1.04063	1.00953	1.03186	1.03069	1.0331	1.04026	1.0142	1.02699	1.02801	1.04522	0.999058	1.05046	1.04001	1.00993	1.02262	1.02596	1.03246	1.03397	1.02779	1.03757	1.00719	1.04676	1.05359	1.02294	1.03821	1.05706	1.02756	1.02054	1.00831	1.02495	1.01372	1.01821	1.0193	1.03175	1.00581
	1.29089	1.02737	1.01849	1.0248	1.00271	1.00285	1.01785	1.01596	1.02599	0.985513	1.03333	1.03119	1.01834	1.02304	1.01726	1.0085	1.02143	1.03819	1.01477	1.04228	1.01847	1.02805	1.00816	1.03436	1.01352	1.01785	1.02646	1.02441	1.0444	1.02109	1.01007	1.02022	1.04944	1.02444	1.04181	1.01878	1.04584	1.04614	1.03938	1.02923	1.031	1.02556	1.03563	1.02999	1.02424	1.00289	1.02984	1.01327	1.02552
	1.29078	1.0163	0.995747	0.999733	1.00955	1.01041	0.993678	0.994803	1.0304	0.996952	0.998595	1.0349	1.01334	1.01503	1.03011	1.00612	1.02152	1.03595	1.00622	1.0352	1.04377	1.03195	1.02939	1.0306	1.02906	1.01686	1.03247	1.0367	1.04137	1.00693	1.02534	1.02534	1.04197	1.02132	1.04635	1.01629	1.00728	1.03763	1.02623	1.03362	1.01599	1.02179	1.02873	1.02177	1.02284	0.992613	1.01696	1.01926	1.01294
	1.29068	1.01136	1.00273	1.00107	0.997182	0.984169	1.00092	1.00558	1.01052	1.00306	1.01157	1.03313	1.03369	1.00577	1.02923	1.03349	1.04623	1.01066	1.02566	1.049	1.03448	1.02283	1.02298	1.03391	1.0263	1.02638	1.00621	1.02674	1.02315	1.04177	1.02604	1.03299	1.02352	1.02266	1.02545	1.01642	1.02444	1.03045	1.0534	1.03564	1.04046	1.01995	1.04186	1.02959	1.0092	1.0099	1.01554	1.01626	0.986282
	1.29058	1.02026	1.02463	1.0214	1.00245	1.0229	1.01053	1.02833	1.00283	1.02274	1.01184	1.01437	1.02357	1.01716	1.02151	1.03378	1.03549	1.02364	1.03643	1.0327	1.03342	1.04259	1.03375	1.04262	1.0371	1.00909	1.03603	1.03036	1.02634	1.02763	1.03818	1.02938	1.02574	1.03232	1.02081	1.03644	0.999707	1.04687	1.02778	1.02836	1.04056	1.04222	1.03683	1.02213	1.02345	1.01344	1.03035	1.0346	1.01925
	1.29048	1.02376	1.0042	1.01391	1.00813	1.02777	1.00719	1.01448	1.00218	1.00984	0.989178	1.03176	1.03255	1.00661	1.02001	1.05134	1.03632	1.04606	1.02398	1.03107	1.05568	1.02538	1.03972	1.02751	1.04722	1.03347	1.02055	1.02306	1.02257	1.03706	1.02724	1.02487	1.0221	1.0194	1.02289	1.0248	1.03386	1.03743	1.02527	1.04393	1.03153	1.04417	1.0428	1.01981	1.01462	1.02601	1.0147	1.02353	1.00963
	1.29037	1.01541	1.00019	1.00708	1.00327	1.00689	1.01191	1.0212	1.01324	0.992116	1.02136	1.02982	1.03763	1.02645	1.02976	1.04688	1.03798	1.04593	1.03191	1.04865	1.054	1.02778	1.03387	1.03868	1.02987	1.03309	1.03533	1.02819	1.02805	1.02204	1.01706	1.01444	1.02841	1.03223	1.02155	1.02541	1.02446	1.03915	1.05564	1.0177	1.01843	1.02766	1.01621	1.00522	1.01763	1.02546	1.01102	1.00602	1.01302
	1.29027	0.993564	1.00185	1.01316	1.00251	1.00452	1.01641	1.0034	1.00537	1.03861	1.01028	1.0171	1.01098	1.02589	1.02438	1.0268	1.01971	1.03579	1.04464	1.03259	1.03672	1.0312	1.03906	1.02168	1.01321	1.03147	1.01177	1.04233	1.01883	1.04486	1.03462	1.0276	1.01818	1.02863	1.02611	1.03311	1.02669	1.03703	1.02658	1.0371	1.03381	1.02317	1.02311	1.00981	1.02423	1.02458	1.01131	1.01439	1.01148
	1.29017	0.988709	1.0265	1.02262	0.998509	1.0011	1.00907	1.01447	1.01121	0.997292	1.01196	1.02367	1.03912	1.01352	1.01399	1.03162	1.02524	1.0307	1.03104	1.03754	1.02713	1.02056	1.02271	1.02693	1.02961	1.03621	1.02115	1.01717	1.03264	1.01031	1.05108	1.02966	1.04608	1.01359	1.0333	1.0335	1.02748	1.03932	1.03054	1.03745	1.03051	1.02496	1.03258	1.00777	1.03211	1.02513	1.01414	1.03781	1.02216
	1.29007	1.01132	0.999208	1.01064	1.02531	0.998077	1.01645	1.01404	1.00897	1.01622	1.0147	1.02278	1.01973	1.01556	1.03156	1.01763	1.02992	1.04333	1.02075	1.03223	1.03267	1.02803	1.0384	1.02679	1.0332	1.02292	1.04524	1.03506	1.02361	1.02597	1.03748	1.02591	1.02603	1.03027	1.03134	1.01881	1.01452	1.02366	1.03325	1.02064	1.01726	1.04449	1.02442	0.998438	1.0211	1.01129	1.01981	1.01744	1.0088
	1.28996	1.02289	1.0003	1.00661	1.01081	1.00818	0.998969	1.02256	0.996078	1.00834	1.0124	1.02279	1.03304	1.01739	1.0327	1.02468	1.01436	1.0293	1.03509	1.03268	1.04082	1.03941	1.0393	1.03263	1.03065	1.02185	1.03022	1.02666	1.02311	1.04036	1.03246	1.03387	1.025	1.02992	1.04183	1.02291	1.03577	1.02883	1.03603	1.03952	1.02632	1.02869	1.01145	1.00188	1.01733	1.02453	1.01241	1.0156	1.01312
	1.28986	0.993504	1.00228	1.00392	1.00933	0.994916	0.999975	1.01947	1.01238	0.991354	1.01189	1.00763	1.0248	1.00357	1.02932	1.00934	1.01982	1.03157	1.04315	1.02589	1.03708	1.04134	1.03221	1.03495	1.05044	1.03895	1.03062	1.04313	1.0245	1.02137	1.03655	1.03239	1.03811	1.03109	1.03537	1.01656	1.01204	1.0591	1.04082	1.00412	1.02138	1.02149	1.02171	1.01771	1.01571	1.02524	1.01261	1.02407	1.01242
	1.28976	1.01521	1.02341	1.00191	1.01846	1.00016	0.994419	1.00761	1.01552	1.00009	1.02405	1.02437	1.0346	1.0267	1.02368	1.0295	1.02397	1.02837	1.02596	1.02233	1.02013	1.02593	1.04162	1.02934	1.02881	1.04317	1.02498	1.0326	1.01219	1.0259	1.0381	1.03828	1.03588	1.02237	1.02564	1.03995	1.04231	1.03046	1.03227	1.03263	1.01834	1.02922	1.02338	1.02893	1.01996	1.00551	1.01692	1.02153	1.02375
	1.28966	1.01489	0.997374	1.01506	0.997021	0.990534	1.01143	1.00149	1.00746	1.01837	1.01148	1.01836	1.02653	1.01751	1.00496	1.03983	1.02146	1.0228	1.01979	1.01619	1.04349	1.03396	1.02541	1.04075	1.02479	1.02355	1.02761	1.03042	1.04201	1.03559	1.02147	1.04195	1.03294	1.03361	1.03552	1.04002	1.04156	1.04916	1.03805	1.04287	1.01617	1.02775	1.00543	1.01339	1.02955	1.01075	1.01138	1.01362	1.0124
	1.28956	1.00075	1.01891	1.01363	0.99814	1.00308	0.996416	0.994926	1.00304	0.997714	1.00296	1.01809	1.03533	1.01452	1.01725	1.02688	1.03439	1.02843	1.03239	1.031	1.03636	1.03182	1.02165	1.03487	1.02791	1.04877	1.0291	1.02998	1.03531	1.04232	1.02453	1.03251	1.02342	1.0292	1.04893	1.03232	1.03853	1.03753	1.03683	1.04931	1.02529	1.02517	1.02181	1.01714	1.01509	1	1.02197	1.02942	1.00115
	1.28945	1.01735	1.00283	1.02104	1.01957	0.998868	1.00855	1.00808	1.02382	1.00433	0.992558	1.01065	1.0183	1.00619	1.0071	1.03964	1.02224	1.03735	1.00671	1.02794	1.03185	1.03328	1.04182	1.03421	1.02251	1.02136	1.04901	1.04406	1.0246	1.04332	1.04566	1.03402	1.024	1.03055	1.03985	1.0331	1.03461	1.02565	1.04048	1.01629	1.01965	1.02351	1.03343	1.01373	1.01455	0.990988	1.02116	1.04248	1.01809
	1.28935	1.03838	1.01153	1.01152	1.02448	0.993192	1.00803	1.00436	0.999133	1.00367	1.00037	1.01981	1.02477	1.01607	1.01351	1.03324	1.03189	1.01354	1.0116	1.02641	1.03647	1.05372	1.01473	1.0272	1.03287	1.03128	1.01716	1.02424	1.02921	1.02311	1.03162	1.03111	1.02247	1.03284	1.02432	1.00528	1.04909	1.02807	1.03321	1.0324	1.02848	1.02059	1.00632	1.02273	1.01281	1.00256	1.02758	1.02597	1.01956
	1.28925	1.00365	1.00497	1.01599	1.01173	1.01636	1.02769	1.03166	0.995605	1.00055	1.02328	1.03769	1.01168	1.02463	1.01917	1.02059	1.02884	1.02378	1.04666	1.03096	1.01125	1.02309	1.03845	1.03581	1.05375	1.01865	1.03095	1.03168	1.02289	1.03206	1.03688	1.04695	1.02163	1.03501	1.02697	1.03158	1.02494	1.03371	1.0375	1.04546	1.01002	1.04209	1.013	1.01902	1.02792	1.01519	1.02699	1.0268	1.0059
	1.28915	1.02499	0.999835	0.981768	1.01319	1.01096	1.01231	1.00843	1.00804	0.996689	1.00705	1.02776	1.00845	1.01682	1.02366	1.01455	1.05111	1.03115	1.02227	1.03809	1.03915	1.04007	1.02766	1.02804	1.03623	1.00774	1.03748	1.03677	1.02567	1.04606	1.01859	1.02965	1.02452	1.03655	1.02983	1.02047	1.03319	1.03046	1.03086	1.0364	1.0228	1.02099	1.01602	1.02473	1.01988	1.00715	1.01026	1.01645	1.01818
	1.28904	0.994055	1.01013	1.00636	1.00447	1.02614	1.02139	1.00458	1.00398	0.992102	1.01297	1.02283	1.03595	1.01287	1.03363	1.02641	1.05199	1.03451	1.04062	1.03895	1.01183	1.02519	1.03931	1.04245	1.0333	1.02385	1.02415	1.02685	1.02341	1.02058	1.02607	1.02668	1.03851	1.02657	1.0278	1.02121	1.03318	1.04286	1.02027	1.02154	1.03335	1.02659	1.01752	1.03432	1.00229	1.01049	1.02888	1.04837	1.01015
	1.28894	1.00291	1.01794	0.981075	1.01025	0.999914	1.0028	1.00772	1.00648	1.0034	1.00321	1.03863	1.0223	1.02242	1.03631	1.02975	1.03116	1.02056	1.04314	1.03099	1.01713	1.02663	1.03283	1.03471	1.03543	1.0169	1.03822	1.0393	1.03983	1.03451	1.04368	1.03198	1.02606	1.0171	1.02403	1.04147	1.03004	1.03127	1.02569	1.03076	1.058	1.02058	1.00924	1.01349	1.03879	1.00721	1.02048	1.0155	1.02859
	1.28884	1.00672	1.00941	1.00094	1.027	1.01292	1.02634	1.01781	1.01112	1.00345	1.00688	1.03286	1.0207	1.0256	1.02681	1.03523	1.03324	1.00332	1.02952	1.03744	1.02825	1.04183	1.04972	1.02598	1.02769	1.02796	1.03028	1.03461	1.01786	1.02361	1.03445	1.03661	1.02917	1.0181	1.03651	1.03752	1.01789	1.04375	1.04318	1.04143	1.02299	1.02113	1.02423	1.01683	1.02335	1.0203	1.00242	1.01588	0.994216
	1.28874	1.01696	0.997155	1.00461	1.00574	0.98571	1.01346	1.01798	1.00874	1.0136	1.00469	1.0154	1.02071	1.00484	1.03014	1.02583	1.01286	1.01804	1.01563	1.01795	1.03966	1.03117	1.0343	1.03634	1.01798	1.04269	1.02477	1.04471	1.02563	1.01885	1.03674	1.0282	1.01904	1.03266	1.03951	1.03839	1.03504	1.04455	1.01834	1.01828	1.02616	1.01689	1.02814	1.0151	1.02267	1.01517	1.01582	1.02461	1.00645
	1.28864	1.00684	1.02423	1.01798	1.01181	1.01892	1.00806	1.01414	0.993438	1.01128	1.00833	1.02062	1.02228	1.02999	1.01556	1.03198	1.03348	1.03158	1.04179	1.04	1.03075	1.0412	1.03292	1.02899	1.01758	1.0399	1.0397	1.01926	1.01554	1.01697	1.02076	1.01801	1.01527	1.02298	1.02543	1.04589	1.05077	1.02389	1.02579	1.02985	1.03195	1.02335	1.00052	1.01146	1.00472	0.998794	1.02124	1.03348	0.995281
	1.28853	0.993721	1.00632	0.989479	1.02025	1.0077	1.00338	1.0164	1.00371	1.01764	1.00768	1.01132	1.02232	1.01609	1.02883	1.03962	1.03211	1.02997	1.01814	1.02628	1.02999	1.03509	1.02928	1.04098	1.03551	1.02429	1.03701	1.01887	1.02055	1.01349	1.04546	1.04065	1.02033	1.04065	1.04339	1.02703	1.0244	1.02714	1.044	1.01573	1.04284	1.04919	1.02817	1.02583	1.03029	1.0095	1.01659	1.01337	1.00627
	1.28843	1.01002	1.01024	1.01731	1.00564	1.00996	1.00052	1.02847	0.996452	0.996398	0.997585	1.03805	1.02067	1.02349	1.0229	1.02796	1.02876	1.04188	1.02961	1.0352	1.03985	1.03818	1.03299	1.03424	1.02391	1.03208	1.03706	1.03672	1.02623	1.03076	1.02037	1.02128	1.02757	1.02723	1.01895	1.02703	1.03685	1.06816	1.04034	1.04747	1.03621	1.01993	1.03561	1.02249	1.02915	0.998204	1.0124	1.01051	1.01074
	1.28833	1.00214	0.993838	1.00944	1.0058	0.989792	1.01022	1.03294	1.01318	1.0122	1.03109	1.02791	1.02465	1.00621	1.03375	1.0239	1.03295	1.02666	1.03124	1.01041	1.04248	1.03049	1.02403	1.03281	1.02975	1.02225	1.03708	1.0344	1.01671	1.01763	1.03104	1.03863	1.02495	1.03088	1.03516	1.01688	1.03858	1.04499	1.01908	1.02074	1.03111	1.01708	1.02548	1.01675	1.01187	1.00596	1.01307	1.02775	0.985205
	1.28823	1.02271	1.01968	1.0008	1.00954	0.992157	1.02659	1.01832	1.01891	1.00346	1.0115	1.01956	1.0311	1.00942	1.0301	1.03427	1.03796	1.04228	1.02873	1.04108	1.01857	1.0289	1.03383	1.02538	1.04442	1.03836	1.02609	1.0116	1.0333	1.02185	1.03125	1.03302	1.02913	1.03001	1.04206	1.02105	1.0421	1.05373	1.02048	1.02938	1.02513	1.02543	1.0433	1.02107	1.02641	1.0205	1.0165	1.02026	1.02378
	1.28813	1.022	1.0055	1.00786	1.02854	1.01207	1.00059	1.01533	1.02764	1.00413	1.00663	1.01533	1.01028	1.01109	1.01895	1.01905	1.02687	1.0383	1.02874	1.03445	1.02183	1.03367	1.03844	1.03151	1.02534	1.03458	1.03925	1.02905	1.02304	1.04333	1.01468	1.0347	1.03238	1.03414	1.01177	1.04231	1.04221	1.03835	1.04503	1.02652	1.032	1.0366	1.01217	1.03049	1.02512	1.02508	1.0049	1.03873	1.02389
	1.28802	1.00056	1.01433	1.00062	0.992203	1.01613	1.01353	1.00154	1.01943	1.01235	1.00347	1.01909	1.00305	1.01031	1.02775	1.03453	1.02761	1.00761	1.03308	1.04634	1.03107	1.01876	1.04007	1.05387	1.03535	1.02584	1.03859	1.02112	1.01813	1.03746	1.05083	1.04124	1.03662	1.02598	1.03601	1.03722	1.04315	1.04097	1.01985	1.03184	1.01593	1.03411	1.02995	1.00674	1.00798	1.00872	1.0268	1.02593	1.0138
	1.28792	1.02556	1.00949	0.999866	1.01973	1.02779	0.994967	1.01649	1.0037	1.02481	1.01142	1.01187	1.02657	1.02121	1.03426	1.02464	1.02485	1.03397	1.02205	1.01429	1.03538	1.05148	1.0355	1.02163	1.02991	1.04209	1.03652	1.02444	1.04003	1.0276	1.03601	1.02587	1.0292	1.01552	1.03138	1.03901	1.04063	1.01486	1.02412	1.01519	1.03999	1.01059	1.01017	1.03604	1.02017	0.998912	1.01137	1.03302	1.01538
	1.28782	0.997314	1.00139	1.01273	1.00949	1.00668	1.0057	1.0073	1.01839	1.00995	1.01461	1.0191	1.01179	1.0161	1.02983	1.05515	1.02053	1.04039	1.02101	1.02063	1.0158	1.02886	1.01285	1.02546	1.02373	1.03214	1.01306	1.03894	1.0108	1.03422	1.0244	1.02115	1.02749	1.02925	1.02505	1.03474	1.02523	1.02871	1.03511	1.02819	1.0348	1.02809	1.02403	1.00477	1.02173	1.01438	1.01931	1.01329	1.01299
	1.28772	1.01408	1.02492	1.0267	1.00726	1.01432	1.02272	1.01483	1.02907	1.02335	1.00981	1.01731	1.02666	1.0291	1.01831	1.0332	1.02494	1.02873	1.00677	1.03629	1.03379	1.0306	1.03799	1.02241	1.06506	1.01224	1.03515	1.03015	1.01948	1.03672	1.0378	1.02119	1.00714	1.04099	1.01808	1.03125	1.0399	1.03936	1.02708	1.02464	1.03127	1.03141	1.03775	1.03803	1.01752	1.0043	1.00844	1.01047	1.03334
	1.28762	1.01829	1.00952	1.00636	1.01115	1.01567	1.0257	1.00481	1.00408	1.01335	1.01469	0.999698	1.00369	1.01701	1.01308	1.02826	1.03287	1.04122	1.02812	1.02108	1.04502	1.01382	1.03496	1.03951	1.02729	1.02351	1.03732	1.0229	1.03319	1.01928	1.03681	1.02663	1.03761	1.03347	1.03062	1.01216	1.02578	1.03316	1.02287	1.04882	1.01983	1.03853	1.0109	1.02156	1.01692	1.00528	1.01191	1.02418	0.998165
	1.28752	1.01187	0.994905	0.998305	0.989261	1.00481	1.00096	0.999055	1.02091	1.00505	1.02538	1.02244	1.02256	1.01788	1.02262	1.01977	1.0382	1.03707	1.03324	1.04605	1.03394	1.02884	1.03407	1.01687	1.01671	1.02591	1.04694	1.02906	1.0253	1.02087	1.04439	1.03163	1.02998	1.02401	1.03617	1.02858	1.01666	1.04145	1.03096	1.03887	1.03032	1.02203	1.03611	1.01985	1.00937	1.02261	1.02366	1.01019	1.00828
	1.28741	1.01354	1.01936	1.01132	1.00639	1.00688	1.01082	1.00404	1.01517	0.995079	1.01229	1.02517	1.01335	1.01792	1.02411	1.03482	1.03533	1.05078	1.01598	1.03726	1.02794	1.0225	1.05258	1.02942	1.04411	1.02837	1.02433	1.03205	1.02708	1.03871	1.03015	1.02999	1.03087	1.03857	1.03546	1.04466	1.03394	1.03489	1.04127	1.02748	1.0439	1.03863	1.03195	1.00648	1.01624	1.01987	1.01331	1.02248	1.03053
	1.28731	0.997194	0.988878	0.994687	1.00955	0.989123	1.01217	1.01077	1.0176	1.01602	1.00905	1.00825	1.01499	1.02586	1.02443	1.01764	1.04119	1.02167	1.03517	1.04526	1.03405	1.03639	1.04383	1.04389	1.03711	1.02472	1.02872	1.04505	1.02897	1.02681	1.0303	1.02761	1.02491	1.0369	1.02694	1.03679	1.01792	1.04667	1.0279	1.03161	1.02699	1.03322	1.01013	1.01854	1.01822	1.0126	1.02696	1.03272	1.01541
	1.28721	1.01136	1.01295	0.987764	0.996353	0.989766	0.999161	1.00497	1.00079	1.00759	1.02311	1.0042	1.0158	1.01086	1.02676	1.01254	1.01998	1.02349	1.02359	1.02069	1.04294	1.03476	1.04808	1.01918	1.02753	1.04214	1.00022	1.03674	1.0255	1.03874	1.02384	1.03093	1.03435	1.03017	1.03399	1.01639	1.04117	1.01905	1.03862	1.00721	1.03606	1.03346	1.02075	1.03905	1.01677	1.02215	1.02488	1.01999	1.01297
	1.28711	1.01486	1.00873	1.02076	1.00871	1.01574	0.996853	0.999868	1.0134	1.01189	1.01477	1.02439	1.02604	1.02696	1.03578	1.0457	1.0128	1.02163	1.01671	1.02583	1.01928	1.04918	1.01892	1.03852	1.04337	1.03907	1.027	1.02111	1.02468	1.03366	1.02709	1.02682	1.03266	1.02854	1.03559	1.0211	1.01215	1.0395	1.03169	1.03171	1.04058	1.02088	1.04259	1.03874	1.02254	1.01481	1.01106	1.02004	1.00531
	1.28701	0.995165	1.02007	1.01211	0.986619	1.01498	1.02105	0.998193	1.0267	1.00339	1.01728	1.02387	1.01832	1.02332	1.02362	1.02922	1.03047	1.02823	1.01759	1.02503	1.04582	1.04151	1.04248	1.03933	1.02846	1.02894	1.02797	1.04212	1.02101	1.04069	1.03268	1.02835	1.01958	1.0248	1.01631	1.03023	1.02826	1.03997	1.03802	1.04553	1.02842	1.04251	1.03917	1.01257	1.01849	1.0179	1.01909	1.02241	1.01737
	1.28691	1.01572	1.00444	0.991601	1.00952	1.01431	1.01804	1.01528	1.0218	1.00594	1.02319	1.01626	1.02779	1.03172	1.02676	1.02707	1.03436	1.01428	1.03996	1.03112	1.02184	1.03146	1.02045	1.03053	1.02557	1.0302	1.04821	1.02919	1.02781	1.03287	1.04906	1.03864	1.04603	1.0248	1.01954	1.03001	1.01556	1.03537	1.0409	1.02791	1.01954	1.01714	1.02378	1.01782	1.01976	1.00963	1.01764	1.01364	1.0252
	1.2868	1.00897	1.00703	1.00541	1.02996	1.00135	1.01435	1.00243	1.02325	1.01631	1.0115	1.00701	1.01574	1.01429	1.02006	1.02783	1.04023	1.03705	1.04097	1.04306	1.02618	1.02701	1.03424	1.04157	1.03514	1.04124	1.03755	1.03644	1.01864	1.02575	1.03153	1.02921	1.04718	1.03427	1.03979	1.02667	1.0226	1.04485	1.03201	1.04267	1.02188	1.04778	1.01945	1.01491	1.03446	1.03532	1.02515	1.01314	1.01881
	1.2867	1.01931	0.996924	0.999455	1.02965	1.01322	1.01148	0.99107	1.00259	1.01473	1.00622	1.01566	1.00107	1.02287	1.02351	1.02488	1.02011	1.02746	1.03438	1.02983	1.02985	1.05056	1.04103	1.04224	1.03026	1.03591	1.02639	1.03636	1.0438	1.01512	1.04109	1.02808	1.03729	1.03762	1.04267	1.05449	1.03327	1.03687	1.01772	1.01488	1.03058	1.03107	1.01754	1.01369	0.99804	1.00399	1.00504	1.02651	0.997068
	1.2866	0.986678	1.01484	1.02382	1.00867	1.0193	1.00755	1.00609	1.01938	1.00764	0.993101	1.02145	1.02465	1.04591	1.02046	1.03728	1.01282	1.03162	1.03138	1.04146	1.03965	1.02296	1.0339	1.02398	1.04319	1.0356	1.01954	1.03859	1.0247	1.0439	1.04485	1.02676	1.05065	1.03344	1.04768	1.03409	1.05208	1.03048	1.03248	1.02595	1.0202	1.02857	1.03082	1.00697	0.991143	1.02285	1.01561	1.02892	0.996003
	1.2865	1.01666	0.99137	0.997176	1.01934	1.00201	1.02056	0.98491	1.01031	1.0198	1.01648	1.03555	1.02513	1.03128	1.0256	1.01989	1.02209	1.01816	1.01607	1.0457	1.05132	1.03699	1.03927	1.04154	1.02397	1.03268	1.04777	1.03395	1.00406	1.03069	1.04805	1.04533	1.04195	1.03614	1.03803	1.02882	1.02428	1.04016	1.04679	1.04395	1.02728	1.03481	1.01167	1.02404	0.996232	1.01904	1.02787	1.01012	1.01929
	1.2864	1.00576	1.01944	0.997446	1.0255	1.0148	1.00161	1.03473	1.02503	1.01129	1.01841	1.01133	1.0137	1.02327	1.03589	1.02722	1.03321	1.03655	1.02458	1.05594	1.02561	1.04521	1.05006	1.02489	1.04672	1.029	1.00925	1.02783	1.04052	1.02187	1.01349	1.02404	1.02554	1.02834	1.02307	1.03102	1.03846	1.04533	0.998222	1.05777	1.0503	1.03343	1.01247	1.01021	1.03118	1.0196	1.01566	1.02385	1.01269
	1.2863	1.01579	1.00377	0.991133	1.03889	1.03833	1.02432	1.02209	1.00676	1.02524	1.00501	1.03534	1.02206	1.0056	1.03026	1.0172	1.02914	1.03118	1.03516	1.0249	1.01639	1.03738	1.04533	1.02391	1.02859	0.997993	1.03928	1.0301	1.02316	1.0193	1.01287	1.03266	1.03436	1.01901	1.03701	1.01999	1.03475	1.05297	1.03851	1.03028	1.02705	1.00902	1.02649	1.04267	1.00121	1.01647	1.02699	1.02455	1.0049
	1.28619	1.02289	1.00461	0.984742	1.01934	1.01642	1.01641	0.987491	1.00322	1.00912	1.0066	1.04197	1.02811	1.01663	1.02943	1.01208	1.04125	1.02646	1.03623	1.03129	1.01898	1.03309	1.01949	1.04248	1.03358	1.03298	1.03124	1.03269	1.02942	1.05439	1.01937	1.01779	1.02243	1.02749	1.03129	1.02578	1.02835	1.02796	1.02982	1.03634	1.03815	1.01838	1.02278	1.02685	1.00883	1.04332	1.01365	1.00841	1.02072
	1.28609	1.01373	1.01983	1.01609	1.00567	1.006	1.00957	0.981191	1.01581	1.01258	0.99155	1.01061	1.01913	1.01664	1.02891	1.06214	1.02544	1.02648	1.01536	1.009	1.04556	1.00431	1.02564	1.00835	1.04203	0.996029	1.02908	1.05385	1.00983	1.05016	1.04269	1.02788	1.03067	1.04044	1.01976	1.0271	1.05022	1.04474	1.02373	1.04802	1.03948	1.04225	1.01998	1.0207	1.0099	1.02523	0.999465	1.01917	1.01964
	1.28599	1.0176	1.03185	1.00689	1.02346	1.01646	1.01228	0.99475	1.0091	1.01751	1.01521	1.02013	1.02529	1.02285	1.01219	1.03363	1.01806	1.05808	1.02992	1.01988	1.0235	1.02364	1.02754	1.04209	1.04095	1.0378	1.01847	1.02981	1.02168	1.0304	1.02587	1.03268	1.03313	1.04294	1.04523	1.03596	1.01457	1.06606	1.0464	1.04549	1.02916	1.03838	1.01743	1.0447	1.01697	1.02489	1.02105	1.03493	1.01494
	1.28589	1.01919	1.01705	1.00206	0.999637	0.988471	1.00104	1.03808	1.00457	1.0053	0.973083	1.00995	1.02174	1.00774	1.01708	1.03264	1.03837	1.05055	1.03629	0.998142	1.04865	1.03431	1.06023	1.02952	1.04084	1.03657	1.0373	1.04541	1.03518	1.00463	1.03661	1.02785	1.01445	1.03797	1.05121	1.01475	1.02836	1.06056	1.03589	1.01704	1.01246	1.02939	1.0225	1.03472	1.01199	1.01356	1.02913	1.03548	1.03762
	1.28579	1.01205	0.995925	1.01153	1.01334	1.01215	0.997039	1.01169	1.00164	1.01272	1.01168	0.988827	1.02047	1.01914	1.02284	1.03161	1.03302	1.03185	1.04923	1.04243	1.04993	1.01536	1.03915	1.02959	1.0353	1.00581	1.02791	1.04115	1.05046	1.03294	1.02554	1.02427	1.04569	1.02322	1.03348	1.04892	1.04894	1.05198	1.01849	1.01993	1.01836	1.01592	1.02048	1.00852	1.00993	1.01981	1.01495	1.01966	1.02149
	1.28569	1.00623	1.00761	1.01389	1.0251	1.0213	0.994755	1.03024	1.02836	1.00663	1.00681	1.03595	1.02042	1.01789	1.03232	1.04226	1.03199	1.02135	1.03017	1.03482	1.05417	1.0272	1.0392	1.03784	1.01677	1.04575	1.0471	1.02078	1.02136	1.04801	1.03048	1.03278	1.00481	1.04184	1.01413	1.0364	1.04519	1.02672	1.04209	1.01613	1.01618	1.0123	1.02074	0.997766	1.04054	1.01405	1.02274	1.00368	1.02916
	1.28558	1.01705	1.02199	0.998615	1.01456	0.994477	1.02259	1.01891	1.00187	1.03004	1.00351	1.02023	1.00359	1.02304	1.01534	1.03062	1.03838	1.02932	1.01765	1.03748	1.02231	1.01796	1.05326	1.03641	1.02285	1.03453	1.04062	1.03826	1.03549	1.02208	1.04659	1.03767	1.04316	1.0481	1.01797	1.03669	1.03426	1.03417	1.03426	1.02329	1.02885	1.02889	1.01889	1.0095	1.02874	1.00542	1.00858	1.00997	1.0192
	1.28548	1.00154	1.0112	1.00686	1.03712	1.00576	1.02791	0.997131	1.02432	1.01401	1.00378	1.0245	1.00962	1.01679	1.03143	1.02441	1.02153	1.04327	1.00884	1.05236	1.01208	0.998134	1.02956	1.02721	1.02421	1.05469	1.0334	1.03061	0.998168	1.02724	1.04423	1.026	1.0322	1.01851	1.05067	1.02379	1.0452	1.02088	1.03682	1.03433	1.02899	1.02809	1.03926	1.01808	1.01449	1.00786	1.00447	1.03193	1.02473
	1.28538	1.01783	1.01114	1.02233	1.00999	1.00323	1.01032	0.993701	1.00294	1.01989	1.00979	1.01883	1.02489	1.0121	1.00945	1.04996	1.00659	1.03179	1.01474	1.03067	1.05497	1.0212	1.03754	1.01442	1.04934	1.03763	1.04265	1.04423	1.02127	1.02523	1.01196	1.03187	1.03125	1.01705	1.02555	1.03216	1.02382	1.04137	1.03353	1.04905	1.00909	1.01967	1.01707	1.02815	1.02553	1.01427	1.01544	1.00221	0.998774
	1.28528	1.02979	1.026	0.995153	1.00129	1.01151	1.03341	1.00519	1.00501	0.987121	1.04068	1.01116	1.01329	1.00685	1.02989	1.02368	1.02786	1.04825	1.00936	1.0481	1.0225	1.04198	1.02861	1.03213	1.0454	1.04425	1.03214	1.01945	1.03748	1.01194	1.03881	1.0199	1.02678	1.0307	1.03748	1.0299	1.02008	1.02689	1.01475	1.03813	1.00536	1.0353	1.01831	1.00703	1.00584	1.02571	1.00116	0.999582	1.02252
	1.28518	1.01379	1.0179	1.01542	1.02103	1.0268	1.0117	1.01955	1.00946	0.997223	1.01777	1.01587	1.02542	1.02158	1.01021	1.03142	1.04257	1.03178	1.02677	1.02102	1.03935	1.03021	1.03687	1.03553	1.05162	1.03809	1.03687	1.03403	1.01196	1.0276	1.03759	1.05239	1.05109	1.01592	1.02646	1.04072	1.03345	1.03049	1.03686	1.03334	1.03171	1.03045	1.0276	1.01421	1.00105	1.00209	1.01539	1.02864	1.01378
	1.28508	1.00941	0.994807	1.01109	0.998343	1.00485	1.02138	0.991879	1.02196	1.01402	1.00805	1.03622	1.0144	1.03115	1.00729	1.03827	1.04072	1.04392	1.03475	1.02052	1.04882	1.0623	1.03574	1.03033	1.04015	1.04005	1.02217	1.02331	1.03736	1.0195	1.0149	1.03194	1.0359	1.00985	1.03086	1.04563	1.02505	1.02569	1.02888	1.02231	1.03288	1.01509	1.02886	1.03816	1.00293	1.00815	1.01741	0.998173	1.02726
	1.28498	1.0029	0.992367	1.01559	1.0123	0.992805	1.00764	1.00391	0.987259	0.996807	1.00101	1.00376	1.00903	1.02168	1.0269	1.03514	1.02797	1.03915	1.03482	1.01945	1.02802	1.0302	1.03578	1.04408	1.04331	1.02365	1.02894	1.04957	1.03267	1.02411	1.01978	1.02975	1.03479	1.04098	1.03979	1.02321	1.04316	1.04742	1.0338	1.03208	1.04265	1.02937	1.01031	1.04046	1.01728	1.01495	1.00694	1.01795	1.02811
	1.28488	1.01111	1.01396	1.01154	1.00929	0.994032	1.01858	1.00498	1.04096	1.01183	1.02103	1.01525	1.01117	1.01581	1.02244	1.03797	1.03751	1.03203	1.04663	1.02053	1.02809	1.03351	1.04446	1.01881	1.0476	1.05161	1.05185	1.02266	1.03059	1.02316	1.02781	1.01849	1.03143	1.0107	1.01822	1.03981	1.04682	1.03763	1.03161	1.05026	1.02842	1.01007	1.03037	1.02332	0.998329	0.996672	1.00714	1.00348	1.01593
	1.28477	1.01734	1.0078	1.01154	1.00527	1.01255	1.0043	0.991121	1.00723	1.01512	0.99807	1.02156	1.01332	1.01589	1.03201	1.02589	1.0489	1.0213	1.02343	1.00476	1.05719	1.0314	1.02875	1.01283	1.02932	1.03506	1.03401	1.04681	1.03073	1.03571	1.01182	1.03547	1.05333	1.02987	1.02926	1.04818	1.03974	1.06657	1.0295	1.01952	1.03332	1.04387	1.02468	1.01723	1.02458	1.03066	1.01677	0.999506	1.02009
	1.28467	1.05206	1.00365	0.993785	1.02263	1.00885	1.03425	1.01265	1.01855	0.983707	1.01258	1.02122	1.01004	1.02402	1.04058	1.0306	1.05439	1.03438	1.0479	1.02442	1.02487	1.02611	1.02995	1.01495	1.05202	1.03123	1.03127	1.0391	1.06058	1.03129	1.05699	1.02566	1.02827	1.04339	1.04953	1.03213	1.02389	1.02821	1.04212	1.02225	1.0278	1.03229	1.01949	1.01459	1.03165	1.01791	1.01047	1.02276	0.997977
	1.28457	1.02826	0.99944	1.01685	1.00208	1.0144	1.02429	1.02188	1.00717	1.01194	1.00929	1.02331	1.00774	1.01828	1.03278	1.02303	1.03888	1.0415	1.03982	1.0486	1.03288	1.0379	1.02723	1.0426	1.02966	1.04256	1.01925	1.02056	1.03899	1.03907	1.01685	1.01645	1.01858	1.04668	1.01959	1.04582	1.03788	1.04263	1.02257	1.03982	1.04382	1.02965	1.02067	1.01765	1.01742	1.04424	1.01753	1.02496	1.02049
	1.28447	1.02666	1.02381	0.98532	0.996964	1.00817	1.00853	1.00283	1.0045	0.997983	1.02007	1.02933	1.02182	1.01288	1.02852	1.03628	1.0301	1.05006	1.02915	1.02555	1.03933	1.0327	1.05368	1.03294	1.02497	1.0333	1.0254	1.04572	1.03403	1.01999	1.02411	1.02624	1.03186	1.03607	1.02347	1.05794	1.04953	1.05233	1.02962	1.03599	1.03247	1.03854	1.03593	1.02553	1.03073	1.0215	1.02016	0.999459	1.02719
	1.28437	1.00708	1.0047	0.995093	1.00934	1.02376	1.00885	1.00576	1.01001	1.03164	1.017	1.01799	1.02145	1.02787	1.00539	1.01212	1.03803	1.04266	1.02238	1.03758	1.03503	1.02496	1.02677	1.02896	1.02514	1.03407	1.04273	1.03374	1.02025	1.05911	1.03803	1.02281	1.04732	1.02732	1.02515	1.05272	1.02012	1.04845	1.03454	1.01461	1.04164	1.0047	1.02172	1.04618	1.01401	1.01722	1.01978	0.998064	0.997541
	1.28427	1.02549	1.02317	1.00781	1.01043	1.00737	1.01173	1.00554	1.01605	1.00226	1.01133	1.02745	1.02706	1.02551	1.0427	1.02365	1.02138	1.00924	1.04104	1.03082	1.03698	1.04508	1.04387	1.03784	1.04236	1.02603	1.03182	1.03655	1.02631	1.0146	1.04126	1.06045	1.01707	1.03472	1.02203	1.03908	1.02325	1.02666	1.01984	1.00459	1.02729	1.01585	1.02591	1.01809	1.01451	1.00769	1.02727	1.00895	1.02731
	1.28417	1.02357	1.00208	0.993378	1.01912	1.01514	1.00416	1.00721	1.00338	0.994282	1.0153	1.02269	1.02844	1.02239	1.02664	1.03688	1.02909	1.02577	1.05366	1.01277	1.01274	1.02771	1.04482	1.04415	1.03758	1.03209	1.03378	1.03655	1.03718	1.0246	1.02785	1.07096	1.04939	1.0295	1.00667	1.01849	1.03324	1.04073	1.0422	1.03012	1.03985	1.01944	1.02003	1.02588	1.00055	1.0171	1.02372	1.0301	1.01704
	1.28407	1.00304	1.02796	1.00365	1.00502	1.01276	1.02966	1.02002	1.00623	1.01212	1.01188	1.02731	1.00818	1.02236	1.01911	1.01533	1.02749	1.02684	1.02337	1.02326	1.04328	1.04455	1.0483	1.01535	1.03565	1.04002	1.02852	1.04085	1.04103	1.02483	1.03693	1.02837	1.00624	1.03607	1.03343	1.03859	1.02331	1.02865	1.02143	1.02734	1.01616	1.02969	1.01158	1.01671	1.02658	1.02606	1.00878	1.01123	1.00721
	1.28396	1.01498	0.989938	1.00337	1.0223	1.0073	1.00773	1.00067	1.00137	0.997828	1.00219	1.02201	1.03149	1.01862	1.01113	1.03501	1.03227	1.02882	1.04774	1.02812	1.0332	1.01421	1.04156	1.05987	1.04401	1.04665	1.02704	1.04575	1.02695	1.03758	1.03903	1.02687	1.00775	1.0508	1.0244	1.0324	1.03466	1.03693	1.03931	1.02755	1.01649	1.04183	1.01371	1.03379	1.01085	1.01354	1.02096	1.01828	1.01783
	1.28386	1.0066	1.02307	0.995284	1.0047	1.02307	1.01045	1.02008	1.00336	1.02102	1.01301	1.01021	1.01271	1.03454	1.02286	1.04316	1.03993	1.02983	1.0285	1.02622	1.02962	1.02628	1.03503	1.04785	1.04666	1.03932	1.04256	1.03277	1.03412	1.02431	1.03047	1.02696	1.03897	1.0163	1.03214	1.03147	1.02298	1.05071	1.03055	1.02679	1.05027	1.02367	1.03413	1.02457	1.0173	1.02387	1.01918	1.01679	0.999235
	1.28376	0.998013	1.00036	1.019	0.994203	1.01283	1.00626	1.01372	1.02053	1.03151	1.02071	0.995001	1.00932	1.01051	1.03319	1.03631	1.03219	1.0526	1.04494	1.02479	1.04586	1.02558	1.03521	1.02608	1.0355	1.03637	1.03726	1.05909	1.03142	1.03585	1.03845	1.03132	1.01191	1.02533	1.02279	1.03164	1.03922	1.04157	1.01841	1.0554	1.01468	1.02725	0.998112	1.02074	1.02048	1.01018	1.03059	1.01672	1.00486
	1.28366	1.00402	1.00465	1.02513	1.02932	1.0213	1.02417	0.996372	1.00915	1.00536	1.00325	1.01806	1.01358	1.01407	1.03191	1.04007	1.03989	1.02618	1.03135	1.03012	1.03878	1.04523	1.03857	1.02366	1.04353	1.02838	1.03504	1.03336	1.03585	1.02003	1.04456	1.0392	1.03547	1.02304	1.04127	1.03254	1.03009	1.03329	1.03964	1.01824	1.03647	1.01625	1.02506	1.03268	1.01914	1.00802	1.01775	1.01423	1.02604
	1.28356	1.02358	0.996223	1.00373	1.01497	1.00053	1.0035	1.00754	1.01304	0.998426	1.02582	1.00869	1.00768	1.01593	1.02873	1.03559	1.0375	1.03757	1.03049	1.02925	1.04071	1.01794	1.0411	1.04586	1.04442	1.06242	1.0335	1.02927	1.0332	1.02792	1.04287	1.04008	1.0373	1.04544	1.03529	1.04543	1.05235	1.02411	1.03174	1.03407	1.02551	1.03467	1.03786	1.03878	1.01621	1.03567	1.01718	1.02219	1.01048
	1.28346	0.999716	0.982476	0.997427	1.01504	1.00452	1.00611	1.01304	1.00753	1.02388	1.00627	0.993837	1.02483	1.02926	1.03312	1.01382	1.03162	1.00956	1.03015	1.03925	1.03346	1.02973	1.05062	1.03807	1.03505	1.02835	1.03253	1.03637	1.01988	1.03236	1.03098	1.02237	1.02725	1.03726	1.04137	1.02795	1.02259	1.03799	1.03106	1.05195	1.04409	1.02894	1.04248	1.02255	1.00576	1.01481	0.997597	1.02095	0.998802
	1.28336	1.01193	0.995027	1.02192	1.00141	1.01257	0.998627	0.999779	1.01894	1.00793	1.00435	1.0245	1.00735	1.03317	1.01927	1.03435	1.03558	1.01179	1.02842	1.02266	1.04004	1.01071	1.03771	1.04646	1.05708	1.02371	1.04125	1.03272	1.02382	1.03605	1.01702	1.02517	1.04104	1.02473	1.00798	1.02307	1.03285	1.03242	1.04577	1.02234	1.03663	1.05749	1.02675	1.02987	1.00275	1.01824	1.01925	1.01114	1.00127
	1.28326	1.03084	1.01249	1.0023	1.00813	0.999414	1.01513	0.997941	1.018	0.983591	1.01652	1.01709	0.99555	1.02844	1.01468	1.0282	1.03268	1.01842	1.02937	1.03377	1.01337	1.01923	1.04642	1.01604	1.02838	1.03525	1.03814	1.02496	1.02751	1.02327	1.01702	1.04217	1.0365	1.03556	1.01788	1.05435	1.02332	1.05673	1.02162	1.04046	1.00667	1.02878	1.0268	1.0377	1.00951	1.02394	1.02094	1.01743	1.00439
	1.28316	1.0141	1.01717	1.00734	1.01794	1.00566	1.01745	1.00158	1.01183	0.999529	1.02106	1.01017	1.00345	1.01198	1.03745	1.03302	1.02552	1.02624	1.01618	1.02149	1.04965	1.02889	1.03269	1.03658	1.04448	1.04187	1.02616	1.03572	1.02016	1.02054	1.0251	1.0368	1.01822	1.01918	1.02651	1.02756	1.0309	1.04114	1.02405	1.04636	1.0081	1.02959	1.03515	1.03027	1.01409	1.0113	1.02018	1.02237	0.995837
	1.28306	1.01859	1.00534	1.01761	1.00373	1.03053	1.01434	1.01926	0.99739	1.00788	1.02469	1.00314	1.01612	1.00266	1.02143	1.00655	1.0394	1.03222	1.02962	1.0291	1.03837	1.03514	1.03537	1.02367	1.04713	1.03274	1.02003	1.0469	1.03387	1.03897	1.03578	1.02966	1.02736	1.02829	1.02427	1.01941	1.03003	1.04421	1.0424	1.03368	1.02132	1.01627	1.02004	1.01975	1.01021	1.03132	1.00703	1.00402	1.01548
	1.28295	1.01884	1.00437	1.02327	1.02342	1.01077	1.0135	1.01176	1.02441	1.00882	1.01116	1.01374	1.01062	1.03643	1.01268	1.0275	1.02805	1.04628	1.04389	1.02545	1.0356	1.02364	1.05015	1.02539	1.01439	1.04786	1.02875	1.03669	1.04894	1.0494	1.0264	1.0233	1.01622	1.04487	1.04252	1.03328	1.02785	1.04841	1.04526	1.03847	1.02885	1.01487	1.03513	1.02855	1.0211	1.02173	1.00286	1.02403	1.00505
	1.28285	0.98541	1.01347	0.997725	1.01436	1.02511	1.00963	1.00157	1.01019	1.00616	1.00514	1.01481	1.01427	1.02572	1.01583	1.04895	1.02969	1.05153	1.03136	1.02425	1.00939	1.02984	1.03541	1.05071	1.03264	1.02196	1.03905	1.03175	1.02498	1.04286	1.00669	1.03605	1.03568	1.03557	1.02545	1.0471	1.01516	1.0285	1.0144	1.02534	1.04268	1.02264	1.02264	1.03926	1.01038	1.01376	0.99911	1.01658	1.01106
	1.28275	1.00317	1.01078	1.00665	1.02251	1.00933	0.997658	0.999739	1.01606	1.01073	1.00861	1.01872	1.01516	1.03469	1.01535	1.01898	1.02254	1.02538	1.03038	1.03958	1.03865	1.03251	1.03006	1.02368	1.04026	1.01731	1.04071	1.04928	1.05093	1.02708	1.04401	1.05945	1.01707	1.03842	1.04995	1.03929	1.0377	1.03545	1.0341	1.02841	1.04679	1.02628	1.03821	1.03469	1.02997	1.01984	1.02104	1.00483	1.01375
	1.28265	1.02467	1.00895	1.00092	1.00806	1.00823	1.02571	1.00912	1.03889	1.01169	1.0194	1.01172	1.01796	1.03507	1.03577	1.00598	1.04628	1.04504	1.03923	1.0485	1.02903	1.0325	1.05418	1.04143	1.04197	1.02302	1.02357	1.03694	1.01767	1.03152	1.04108	1.03234	1.04062	1.02947	1.02796	1.06924	1.03559	1.07261	1.0126	1.02506	1.02849	1.03418	1.02009	1.01182	1.02676	1.01379	1.00743	1.01975	1.01282
	1.28255	1.01614	0.9951	1.00566	1.00533	1.01332	1.01678	1.00644	1.00736	1.01171	1.01378	1.00303	1.01705	1.0229	1.01686	1.04002	1.02825	1.02434	1.03628	1.02005	1.02405	1.039	1.03804	1.02813	1.03384	1.0409	1.03745	1.02543	1.00512	1.03249	1.04294	1.01783	1.03071	1.03129	1.0419	1.02181	1.02709	1.0389	1.04818	1.0266	1.00365	1.03717	1.0137	1.03003	1.00898	1.02328	1.01663	1.01268	1.03249
	1.28245	1.01736	1.00612	0.996261	0.996275	1.02474	1.01189	1.03121	1.01716	1.00976	1.01274	1.00683	1.02982	1.01465	1.02861	1.03098	1.02914	1.02211	1.04754	1.02735	1.02894	1.01912	1.03245	1.0402	1.04997	1.01751	1.04084	1.03383	1.04532	1.03449	1.02223	1.0432	1.03879	1.04321	1.02761	1.05282	1.0314	1.02947	1.0335	1.03512	1.02944	1.04563	1.01806	1.03002	1.02817	1.02455	1.03495	0.998336	1.02495
	1.28235	1.02947	1.02559	1.00138	0.994001	1.00841	1.00338	1.03091	1.0019	0.994834	1.01371	1.00899	1.02504	1.01036	1.02989	1.01505	1.02748	1.03622	1.02148	1.01773	1.04767	1.02664	1.03879	1.02829	1.02342	1.02511	1.03133	1.03609	1.02771	1.03553	1.008	1.03835	1.02849	1.03107	1.04299	1.04556	1.06533	1.02629	1.05174	1.01819	1.03671	1.02989	1.03416	1.02668	1.02158	1.01287	1.02054	1.00692	1.02699
	1.28225	1.00122	1.01489	1.0131	1.01073	1.00753	1.00828	1.01473	1.02643	1.02707	1.0235	1.0282	1.032	1.00706	1.02026	1.01228	1.01711	1.01328	1.04152	1.0155	1.04138	1.0265	1.03517	1.01328	1.04341	1.03859	1.0365	1.0455	1.02686	1.05089	1.04202	1.01461	1.04904	1.02918	1.02659	1.0333	1.02939	1.04534	1.01587	1.01949	1.02955	1.0248	1.03634	1.04312	1.02244	1.0111	1.01335	1.03073	1.02784
	1.28215	1.01499	0.993075	0.990234	1.01074	1.01875	0.998813	0.997637	1.00452	1.02715	1.02058	1.01085	1.0211	1.02747	1.02181	1.02081	1.03199	1.02324	1.02297	1.045	1.03828	1.02759	1.03428	1.01803	1.05486	1.04427	1.02547	1.03024	1.03222	1.00126	1.05112	1.03639	1.02071	1.02323	1.02553	1.03725	1.03236	1.02624	1.03291	1.03278	1.04218	1.02882	1.05739	1.02819	1.01254	1.01818	1.01502	0.993233	1.00616
	1.28205	1.01904	1.02075	0.997385	0.981517	1.00843	1.00053	1.00165	1.01375	1.0088	0.999007	1.03172	1.01405	1.01573	1.0218	1.03646	1.03656	1.03526	1.03112	1.01585	1.02389	1.02255	1.04472	1.03684	1.04266	1.02655	1.03051	1.03432	1.03709	1.03058	1.03223	1.04347	1.02066	1.05064	1.03141	1.034	1.04419	1.04364	1.00873	1.02399	1.02697	1.0263	1.02987	1.03833	1.03494	1.02395	1.01878	1.02253	1.01948
	1.28195	1.01394	1.0298	1.00736	0.993579	1.01453	1.02197	1.01891	1.01814	1.02611	1.00607	1.01152	1.00522	1.03611	1.05124	1.02515	1.04522	1.02873	1.03642	1.02942	1.0426	1.01013	1.06614	1.04061	1.01321	1.02347	1.03147	1.0329	1.0392	1.01615	1.00669	1.03447	1.01434	1.03627	1.0514	1.03844	1.01846	1.01863	1.03961	1.03477	1.02401	1.02966	1.0194	1.01448	1.03035	1.0381	1.01603	1.02392	1.01563
	1.28185	1.00912	1.01301	1.02435	1.01863	1.01889	1.022	1.01094	0.993527	1.00057	1.02372	1.00689	0.998927	1.03859	1.02411	1.02775	1.03218	1.03432	1.03645	1.01961	1.02909	1.03154	1.02466	1.0303	1.02386	1.03963	1.04197	1.05466	1.01567	1.03363	1.02637	1.03967	1.0359	1.04879	1.04228	1.03103	1.03017	1.04807	1.0294	1.03702	1.01832	1.04051	1.01002	1.02995	1.0284	1.01384	1.03919	1.0133	1.03155
	1.28174	1.01533	1.02772	0.990672	1.00474	1.01921	0.998534	1.01321	1.03142	1.02033	0.997367	1.01724	1.01192	1.00778	1.01839	1.02239	1.04327	1.01529	1.0309	1.0487	1.01108	1.02943	1.02995	1.03048	1.05132	1.03066	1.03929	1.02939	1.02725	1.03791	1.01257	1.01293	1.0327	1.03712	1.02435	1.0266	1.01708	1.00905	1.03326	1.00523	1.02929	1.02623	1.00351	1.03947	0.998755	1.03058	1.03227	0.991915	1.01763
	1.28164	1.00519	0.991502	0.99943	0.998567	1.01027	1.00769	1.00911	1.03219	1.00554	1.00645	1.02355	1.00052	1.02344	1.03071	1.01343	1.03518	1.02545	1.02541	1.03117	1.0355	1.02323	1.04803	1.0385	1.03759	1.04805	1.04116	1.03904	1.0211	1.02015	1.03696	1.03355	1.0349	1.03506	1.00732	1.04618	1.03907	1.03932	1.04272	1.02382	1.0111	1.02523	1.03013	1.04134	1.01182	1.02684	1.01726	1.02246	0.994285
	1.28154	1.01055	1.01872	1.0044	1.01172	1.00589	1.02975	1.05044	1.01566	0.996569	1.00048	1.01321	1.02497	1.01319	1.03376	1.03729	1.04635	1.04301	1.02835	1.02438	1.03894	1.02398	1.02988	1.02559	1.03523	1.02628	1.04974	1.02494	1.01426	1.02728	1.04527	1.01461	1.03057	1.0254	1.04348	1.05065	1.03807	1.02832	1.02314	1.01612	1.02057	1.01568	1.04734	1.01242	1.01095	1.0144	1.02192	1.01242	1.01269
	1.28144	1.01838	1.00355	1.01512	1.02465	1.02272	1.0233	1.01482	1.02044	1.02426	1.02097	1.02773	1.02149	1.03168	1.04467	1.02222	1.03075	1.02891	1.03637	1.03323	1.02894	1.0136	1.03179	1.03795	1.02728	1.03314	1.02531	1.03218	1.02446	1.01943	1.03768	1.024	1.0272	1.03706	1.03734	1.03732	1.04237	1.03506	1.03265	1.03091	1.0324	1.03721	1.01553	1.03927	1.01006	1.03894	1.00911	0.986649	1.01374
	1.28134	0.999822	0.990416	1.00069	1.01493	1.01	1.01199	0.998427	1.02896	1.01199	0.997266	1.01752	1.02044	1.03167	1.02424	1.04415	1.04063	1.02779	1.03317	1.02883	1.03458	1.03458	1.03303	1.03166	1.04353	1.03811	1.03471	1.02495	1.01166	1.0236	1.02217	1.04232	1.04174	1.02791	1.04477	1.06922	1.02	1.02213	1.03619	1.02322	1.02254	1.01077	1.03502	1.04138	1.01403	1.01868	1.01333	1.0013	1.00181
	1.28124	1.00529	1.00903	1.00516	1.00957	1.02342	0.998891	1.01945	1.02886	0.996711	1.01136	1.01088	1.02156	1.02483	1.02749	1.03742	1.04829	1.0136	1.0195	1.04122	1.02791	1.02081	1.04531	1.01857	1.03938	1.03714	1.05465	1.04081	1.03861	1.02903	1.03477	1.02891	1.03124	1.0402	1.03924	1.0167	1.03725	1.0343	1.00793	1.0529	1.0226	1.01816	1.0334	1.0185	0.997738	1.01897	1.02728	1.00377	1.02643
	1.28114	1.00311	0.989626	1.0066	1.01175	1.02037	1.02338	1.01705	1.02653	1.01763	1.01569	1.00727	1.01384	1.01657	1.02749	1.03831	1.03184	1.03145	1.03051	1.01915	1.0243	1.03242	1.02834	1.02777	1.03806	1.04706	1.05116	1.04314	1.02965	1.02257	1.0464	1.0322	1.03473	1.03255	1.03696	1.03277	1.03089	1.04326	1.04054	1.01059	1.01408	1.03537	1.01621	1.02808	1.02867	1.04533	1.01067	1.00367	1.01247
	1.28104	1.03169	1.01014	1.02086	1.02039	1.04169	1.00531	1.00512	1.02445	1.00301	0.990548	1.01536	1.01491	1.01377	1.03978	1.02696	1.05292	1.03552	1.03087	1.02472	1.0423	1.03219	1.03271	1.03702	1.03929	1.02029	1.01634	1.0623	1.01311	1.03736	1.03864	1.02192	1.03985	1.05298	1.03029	1.05334	1.02779	1.04504	1.02619	1.02922	1.0219	1.03128	1.0244	1.02766	1.0024	1.03793	1.0034	1.0086	1.00748
	1.28094	1.01936	1.0149	1.00935	1.03227	1.01866	0.994825	1.01433	1.01475	1.01704	0.992443	1.01568	1.02477	1.03552	1.03641	1.05368	1.05417	1.03457	1.01964	1.0185	1.00612	1.00463	1.02106	1.02929	1.03119	1.03706	1.0437	1.03775	1.03338	1.04018	1.02242	1.03455	1.02897	1.0262	1.02041	1.05796	1.02586	1.02089	1.04654	1.00932	1.03196	1.03608	1.01416	1.03399	1.01142	1.01252	1.02101	1.01083	1.01625
	1.28084	0.982729	1.0001	0.996924	1.01536	1.03102	1.01746	1.01449	1.01435	1.00645	1.02032	1.01724	1.00412	1.00867	1.0394	1.01365	1.03878	1.0245	1.03825	1.02289	1.02775	1.01977	1.04928	1.04362	1.05663	0.997387	1.01204	1.04981	1.03447	1.02208	1.01982	1.04707	1.02589	1.03248	1.02497	1.03681	1.03223	1.04504	1.04512	1.03215	1.02288	1.0172	1.0225	1.04178	1.01175	1.05342	1.01327	1.02972	1.01117
	1.28074	1.00558	1.01461	1.02854	0.992851	1.03867	1.02331	1.03497	0.996751	1.02512	1.01475	1.015	1.01197	0.98551	1.00603	1.04306	1.02659	1.02581	1.03512	1.05634	1.03638	1.04439	1.06173	1.03241	1.03268	1.03679	1.00806	1.02702	1.00997	1.02741	1.05508	1.01163	1.05681	1.02372	1.02429	1.03815	1.00996	1.04107	1.00332	1.0212	1.01824	1.02531	1.01066	1.04866	1.03786	1.02766	1.00345	1.02404	1.01103
	1.28064	1.00694	1.00906	0.986016	1.02237	1.02007	1.01496	0.997736	1.00659	0.991456	1.01471	1.03448	1.00761	1.02817	1.02141	1.00982	1.01507	1.03367	1.04422	1.0321	1.04547	1.0532	1.04544	1.02163	1.02801	1.02308	1.02872	1.03414	1.03536	1.00821	1.02448	1.00866	1.01798	1.03512	1.04766	1.03798	1.04069	1.04577	1.03391	1.03147	1.02526	1.01337	1.02338	1.02811	1.00314	1.03824	1.02801	1.01042	1.00268
	1.28054	0.994432	1.02196	1.00159	1.00599	1.00384	0.987617	1.00794	1.01236	0.994629	1.00924	0.995071	1.00911	1.04866	1.02698	1.03675	1.028	1.04811	1.0172	1.00658	1.05173	1.02452	1.02068	1.03394	1.0352	1.02054	1.06105	1.03919	1.02257	1.02614	1.03634	1.03603	1.03012	1.0324	1.04619	1.03794	1.03011	1.04935	1.04307	1.01919	1.02954	1.0417	1.04114	1.0244	1.01307	1.01616	1.00441	0.999935	1.01513
	1.28044	1.00136	1.00326	1.0398	1.00305	0.995566	1.03007	0.991805	1.01282	1.00163	1.03378	0.986697	1.02065	0.991321	1.01759	1.01493	1.02672	1.0196	1.03053	1.01107	1.03201	1.02593	1.04143	1.02298	1.02707	1.05704	1.02634	1.05211	1.02395	1.04372	1.04361	1.01205	1.01391	1.01927	1.01332	1.03007	1.01551	1.04005	1.03897	1.0519	1.03069	1.04014	1.0018	1.02007	1.00562	1.03137	1.01997	1.01955	1.03386
	1.28034	0.991041	1.00325	0.998165	1.00162	1.01167	1.03147	1.01115	1.00893	1.01497	0.975228	0.992161	1.01626	1.0188	1.0238	1.02781	1.0399	1.0644	1.02613	1.01717	1.03967	1.02311	1.04708	1.02027	1.038	1.02213	1.04818	1.04191	1.01497	1.04073	1.02915	1.04042	1.0494	0.994524	1.03765	1.02857	1.03142	1.02581	1.02977	1.03427	1.01707	1.00923	1.02282	1.03133	1.02953	1.00869	1.01574	0.985154	1.02252
	1.28024	1.00858	1.01948	1.00875	1.02441	1.05346	1.00971	1.02473	1.00056	0.997253	1.0119	1.00203	1.01186	1.02197	1.02535	1.04094	1.03469	1.04371	1.05241	1.03046	1.0474	1.0257	1.02733	1.02998	1.03483	1.02968	1.03781	1.04551	1.00005	1.03486	1.03479	1.00729	1.02987	1.01008	1.03324	1.03631	1.0424	1.02735	1.03701	1.02315	1.0356	1.02625	0.996983	1.03143	1.00945	1.0098	1.00453	1.0179	1.02693
	1.28014	0.982699	1.00615	0.978445	1.04798	1.02144	1.01857	1.0036	1.02409	1.00606	1.00904	1.03082	1.0222	1.0188	1.03484	1.02392	1.04146	1.03564	1.03996	1.04297	1.02152	1.01868	1.05158	1.05137	1.03075	1.04044	1.03523	1.04938	1.00809	1.03181	1.03328	1.03468	1.00449	1.03071	1.02605	1.06347	1.03452	1.05153	1.02739	1.04244	1.03064	1.02133	1.05559	1.04278	0.99791	1.01245	1.02167	0.98767	0.995374
	1.28004	1.03366	1.02225	0.984351	1.01724	1.02687	1.0368	1.00656	1.0067	1.00913	0.986542	1.01565	1.03826	1.02204	1.02024	1.01496	1.04793	1.03562	1.02769	1.03533	1.04916	1.02147	1.04301	1.04848	1.05467	1.01737	1.03397	1.05104	1.04006	1.06758	1.04513	1.01997	1.03603	1.04727	1.06466	1.02714	1.03783	1.02581	1.03849	1.02811	1.0197	1.0324	1.04766	1.01987	1.00817	1.04992	1.02782	1.01778	1.00676
	1.27994	1.00281	1.01653	0.997006	1.01155	1.02544	1.0096	1.01577	1.0357	1.02584	1.02651	1.01015	1.02521	1.01549	1.03469	1.03709	1.04948	1.01095	1.04807	1.03991	1.03058	1.01675	1.01536	1.02013	1.05766	1.05466	1.01528	1.0374	1.02301	1.01973	1.01495	1.01368	1.02673	1.02899	1.02288	1.02416	1.02515	1.03853	1.0329	1.03605	1.0278	1.04351	1.02757	1.0098	1.01718	1.03822	1.00445	0.991708	1.03065
	1.27984	1.01168	0.976639	1.01029	0.994364	1.00921	1.02388	1.01135	1.04093	1.00599	1.00302	1.00306	1.02685	1.02542	1.0093	1.012	1.02963	1.04605	1.02903	1.0288	1.03538	1.01842	1.03597	1.04739	1.02921	1.03763	1.02454	1.03339	1.01175	1.03346	1.0271	1.03026	1.03147	1.01672	1.01029	1.02594	1.03634	1.04651	1.01662	1.02499	1.03429	1.03568	1.01424	1.03651	0.995291	1.02915	1.02162	0.979184	1.00396
	1.27973	0.999845	1.00759	0.987957	1.013	1.01866	1.00698	1.01111	0.981898	1.02139	1.00013	1.01766	1.02681	1.01386	1.004	1.02274	1.04589	1.05099	1.05786	1.04319	1.0323	1.05267	1.03745	1.0414	1.04768	1.04186	1.03126	1.04024	1.02305	1.02429	1.02733	1.02725	1.03304	1.01101	1.0364	1.05567	1.00315	1.0399	1.03288	1.02702	1.03138	1.01747	1.028	1.02452	0.999247	1.01619	1.02768	1.00371	1.01515
	1.27963	1.02087	1.0166	1.03312	1.01597	1.03758	1.01467	1.02056	1.0331	1.0215	1.01483	1.01364	1.00561	1.0238	1.02518	1.03741	1.01629	1.04574	1.02144	1.03073	1.04642	1.02729	1.04766	1.01041	1.04791	1.03516	1.01968	1.04054	1.02312	1.03201	1.04532	1.0172	1.01317	1.00678	1.01175	1.02806	1.04293	1.01812	1.02205	1.02853	1.03765	1.00818	0.998368	1.02826	1.04057	1.0385	1.02161	1.00687	1.01661
	1.27953	1.02366	1.02399	1.01035	1.02033	0.995741	0.993974	1.0219	1.02423	1.02919	0.993118	1.0027	1.02961	1.03524	1.03462	1.0163	1.03646	1.03931	1.03232	1.02163	1.01689	1.04653	1.05643	1.03153	1.05793	1.04354	1.03801	1.06885	1.01039	1.01472	1.0154	1.03496	1.00964	1.01494	1.01513	1.05261	1.01372	1.03997	1.02732	1.01777	1.01021	1.03151	1.01027	1.02311	1.03523	1.02271	1.0296	0.983409	1.01951
	1.27943	1.0132	0.985511	0.985567	0.990054	1.01493	1.01743	1.00357	1.01152	0.992924	0.973349	1.00237	1.02201	1.03819	1.02955	1.03471	1.03923	1.03918	1.02064	1.01483	1.02349	1.01897	1.03793	1.02177	1.03995	1.03155	1.02135	1.02703	1.02032	1.02936	1.03843	1.0379	1.03341	1.01145	1.02391	1.0497	1.02424	1.04496	1.04061	1.00814	1.01261	1.04214	1.02641	1.04044	1.01558	1.01633	1.01626	1.00447	0.99666
	1.27933	1.00283	0.979615	0.997144	0.988768	0.983622	1.0268	1.00359	1.01515	1.03183	1.03578	1.0035	1.00877	1.04324	1.035	1.02041	1.03656	1.03928	1.01773	1.00566	1.05255	1.02615	1.02972	1.03715	1.02639	1.02583	1.02534	1.03851	1.03154	1.0412	1.04706	1.02936	1.0128	1.01532	1.02239	1.01892	1.01804	0.991792	0.992051	1.01737	1.01159	1.03426	1.01471	1.03893	1.04157	1.01591	1.01415	1.00637	0.997993
	1.27923	1.0188	0.98299	1.00342	1.00591	1.02062	1.02532	1.04378	1.03101	1.00645	1.0023	1.00327	1.03216	1.02379	1.02645	1.04519	1.02732	1.01996	1.03446	1.02055	1.03721	1.0583	1.03526	1.03979	1.0346	1.02341	1.0253	1.01536	1.03145	1.05159	1.03557	1.03364	1.02167	1.03438	1.03106	1.03753	1.02626	1.03523	1.01946	1.00125	1.01185	1.03915	1.04048	0.989466	1.01829	1.03117	1.01831	1.01108	1.01231
	1.27913	0.999885	0.988597	0.997598	1.02312	0.995444	1.03477	1.02881	1.01155	1.00215	1.01512	1.01153	0.987627	1.02701	1.03039	1.02563	1.02735	1.03773	1.03137	1.00685	1.07348	1.03333	1.05382	1.02177	1.03173	1.03951	1.03691	1.04466	1.01649	1.03086	1.04715	1.019	1.03482	1.00875	1.04403	1.03151	1.02615	1.03366	1.04282	1.05716	1.01947	1.0217	1.03131	1.03001	0.996593	1.02693	1.00617	0.997784	1.01372
	1.27903	1.01916	1.01353	1.00928	1.01454	1.01515	1.01622	1.0126	1.01327	1.02298	1.00078	1.00348	1.02496	1.00037	1.01457	1.01782	1.01809	1.01854	1.02256	1.03132	1.06545	1.02044	1.03394	1.03989	1.03733	1.04521	1.03304	1.04108	1.03274	1.03236	1.04119	1.05311	1.00968	1.04923	1.01401	1.0149	1.03105	1.04147	1.01681	1.03331	1.04123	1.00742	1.06361	1.04115	1.00938	1.03338	0.9989	0.99036	1.01512
	1.27893	1.00433	0.988842	1.01971	1.01028	1.029	1.05174	1.03029	1.01351	1.01546	0.988258	1.01693	1.03222	1.01753	1.03819	1.03871	1.03399	1.03923	1.03323	1.02718	1.02083	1.03777	1.04118	1.03814	1.02689	1.04134	1.05407	1.03389	1.03461	1.0296	1.03006	1.04965	1.03792	1.04618	1.04124	1.03352	1.03742	1.05223	1.01435	1.00048	1.00954	1.03627	1.01563	1.03226	1.03966	1.061	1.0135	0.989891	1.01372
	1.27883	1.04094	1.00473	0.997459	1.01883	0.997288	1.00987	0.980528	1.01468	0.989175	0.994281	1.01226	1.02038	0.997717	1.0372	1.04753	1.01728	1.03295	1.0532	1.03164	1.00368	1.04929	1.05113	1.04529	1.02851	1.03889	1.02818	1.0544	1.02429	1.04424	1.04879	1.04384	1.04676	1.02604	1.02582	1.03808	1.03913	1.03508	1.02348	1.02143	1.01455	1.03049	1.0188	1.02757	1.0203	1.01466	1.01832	0.965423	1.00818
	1.27873	1.0159	1.02503	1.01689	1.01173	1.01973	1.01516	1.00634	1.0326	1.01842	1.00549	0.991416	1.03492	1.0408	1.03738	1.0182	1.04859	0.991947	1.03528	1.01765	1.03597	1.00487	1.04164	1.01398	1.04373	1.03646	1.0336	1.04453	1.01938	1.05144	1.01383	1.06527	1.01398	1.02226	1.02103	1.02941	1.0301	1.03806	1.03739	1.0277	1.0147	1.01859	1.01901	1.01694	1.00672	1.03159	1.02827	0.998054	1.0013
	1.27863	0.983598	1.00635	1.03739	1.01595	1.02714	1.02027	0.99073	0.998604	1.02125	1.02798	1.02119	1.01034	1.03134	1.04547	1.01465	1.05322	1.04838	1.02102	1.03221	1.02881	1.02002	1.02974	1.02206	1.02545	1.02627	1.03131	1.03484	1.03379	1.03701	1.03209	1.03262	1.03235	1.03211	1.02632	1.03842	1.02479	1.04821	1.02468	1.05194	1.03133	1.0308	1.0136	1.05823	1.01525	1.02054	1.01353	1.00865	1.01649
	1.27853	0.986396	1.01058	1.00139	0.996604	1.02892	1.01026	1.00338	1.00123	1.02273	1.021	1.00041	1.01454	1.04408	1.02759	1.03586	1.05586	1.04397	1.03541	1.03349	1.00312	1.02396	1.03229	1.01419	1.03068	1.01954	1.03115	1.04589	1.04232	1.05179	1.03026	1.03683	1.01365	1.03759	1.02048	1.02689	1.01575	1.06545	1.04048	1.03228	1.02829	1.03672	1.04993	1.02342	1.0253	1.02122	1.02421	0.994319	1.00958
	1.27843	1.00576	1.00917	0.98057	1.00764	1.01606	1.00059	1.02228	1.03433	0.99433	1.03508	1.007	1.02015	1.02234	1.04163	1.01601	1.03034	1.01617	1.0206	1.05435	1.06137	1.05059	1.07515	1.05462	1.04375	1.04844	1.00414	1.03316	1.01338	1.04	1.05045	1.0542	1.05876	1.01023	1.0276	1.02264	1.04108	1.04526	1.04552	1.01782	1.02857	1.00088	1.04123	1.02866	1.00312	1.02396	1.02908	0.987905	1.00294
	1.27833	1.01148	0.993602	0.999985	1.03154	1.0245	1.0342	1.01048	1.01358	1.00155	1.0169	0.997435	1.00757	1.01462	1.01413	1.00018	1.04041	1.02858	1.03545	1.04396	1.04943	1.05197	1.03501	1.03552	1.05877	1.02486	1.02757	1.03469	1.03383	1.0443	1.03903	1.03691	1.04102	1.03343	1.04852	1.02024	1.03548	1.04658	1.02856	1.01964	1.03051	1.00971	1.01607	1.01706	1.00909	1.03918	1.02993	0.993451	1.00445
	1.27823	1.00858	0.985448	1.00864	1.01042	1.02873	1.033	0.989579	1.01947	0.996196	1.01558	1.00246	1.01867	1.00283	1.02986	1.03223	1.04664	1.03018	1.04745	1.02678	1.0463	1.02558	1.04486	1.01959	1.03774	1.05519	1.04132	1.05492	1.01266	1.02872	1.03504	1.03281	1.02688	1.0323	1.03486	1.03359	1.03425	1.05808	1.02341	1.03013	1.04346	1.03994	1.01783	1.05312	1.01604	1.02294	1.01961	0.994267	1.01992
	1.27813	1.02103	1.01614	1.02294	1.00371	1.01321	1.03272	0.996548	1.0226	1.00887	1.00632	1.02536	1.00913	1.02383	1.03342	1.02863	1.03756	1.03623	1.04456	1.0341	1.03488	1.03524	1.02291	1.02993	1.00803	1.05135	1.02955	1.01846	1.00776	1.03449	1.02249	1.05044	1.02862	1.03162	1.03532	1.03816	1.0472	1.03897	1.03513	1.02495	1.02713	1.04149	1.00673	1.03351	1.02449	1.00114	1.02065	0.995629	1.02054
	1.27803	1.01534	0.99688	1.009	1.00784	1.00733	1.02044	1.01939	1.01935	1.02367	0.99406	1.03087	1.02646	1.02089	1.0324	1.04151	1.04719	1.04669	1.05877	1.01493	1.02945	1.02627	1.04131	1.02237	1.02992	1.04523	1.03102	1.02396	1.04152	1.03593	1.05185	1.01639	1.01973	1.03713	1.01823	1.04117	1.00576	1.02372	1.0419	1.00496	1.01544	1.00136	1.0311	1.04684	1.00764	1.02047	1.00853	0.966997	1.01592
	1.27793	1.01534	1.01327	0.999868	1.03354	1.05118	1.02166	1.00861	1.01855	0.96698	0.989933	1.02176	1.03167	1.02527	1.0453	1.02754	1.01785	1.02751	1.01983	1.01262	1.04332	1.00152	1.05416	1.02489	1.03632	1.03551	1.03804	1.03903	1.00587	1.03334	1.01321	1.02169	1.04623	1.04381	1.04439	1.03904	1.02003	1.04529	1.04619	1.04452	0.997538	1.02336	1.02412	1.04282	1.01304	1.01477	1.01499	0.998801	0.998909
	1.27783	1.00307	1.0092	1.02027	1.00801	1.02419	1.01101	0.995116	1.02364	1.01576	0.995993	1.00139	1.00226	1.02977	1.02236	1.00984	1.02947	1.01876	1.04478	1.02604	1.03364	1.01323	1.02208	1.01856	1.04626	1.01193	1.04391	1.02732	1.01704	1.05196	1.02658	1.00653	1.04353	1.02596	1.03593	1.03541	1.0513	1.03961	1.02216	1.03273	1.03362	1.02765	0.99414	1.02587	1.02033	1.03971	1.01767	0.985523	1.0312
	1.27773	1.00309	0.995853	1.02032	1.00155	1.01391	1.02169	1.00195	1.0412	1.02566	1.01575	1.00774	1.02809	0.999417	1.00176	1.03114	1.02227	1.03921	1.02939	1.05419	1.03651	1.03801	1.04796	1.03486	1.03043	1.02455	1.00602	1.02198	1.03921	1.02854	1.01676	1.0197	1.0153	1.02006	1.02789	1.02994	1.03246	1.03555	1.01894	1.03326	1.03377	1.03193	1.01675	1.03018	1.01874	1.02672	1.02347	1.01813	1.00818
	1.27763	1.00051	1.02099	1.00215	1.01587	1.00774	1.0105	1.01385	1.01992	1.03309	1.01986	0.993122	0.989916	1.01686	1.0327	1.01632	1.04351	1.03477	1.06237	1.01429	1.03008	1.03178	1.02676	1.0121	1.0448	1.03779	1.02002	1.05237	1.01832	1.01414	1.03354	1.0169	1.01467	1.01938	1.02854	1.02181	1.02785	1.04048	1.03577	1.03581	1.03172	1.01999	1.01362	1.0241	1.02136	1.03465	1.01025	1.00764	0.996132
	1.27753	1.00569	1.01428	1.01013	1.03971	1.03049	0.992103	1.00938	1.01532	1.00569	1.01259	0.996068	1.00456	1.00796	1.03089	1.03432	1.01042	1.02813	1.02226	1.02822	1.04285	1.03558	1.04486	1.02169	1.02254	1.05067	1.04181	1.01789	1.01916	1.04834	1.03053	1.0278	1.0287	1.02507	1.0422	1.04737	1.02457	1.03672	1.03455	1.04086	1.02455	1.02871	1.01617	1.03504	1.02807	1.06274	0.994217	1.01234	1.00266
	1.27743	1.00822	0.987171	0.992689	1.01454	1.03301	1.00327	1.00911	1.01351	1.02672	1.00001	1.02744	1.03002	1.02755	1.01705	1.03629	1.0413	1.04796	1.00679	1.02122	1.04898	1.01833	1.03158	1.04631	1.02376	1.02697	1.01426	1.02831	1.02653	1.01961	1.02966	1.02458	1.01231	1.00169	1.02276	1.0287	1.04009	1.00924	1.02113	1.02045	1.02674	1.00863	1.03136	1.03589	1.0124	1.03763	1.00592	1.02274	1.00357
	1.27733	1.02161	0.99953	1.00446	1.00499	1.02278	1.01851	0.992278	1.01258	1.01337	1.01074	0.999465	1.02144	1.01709	1.02828	1.04642	1.0434	1.03881	1.02383	0.989021	1.04417	1.02506	1.03241	1.00392	1.01784	1.02636	1.03249	1.03926	1.00848	0.998716	1.01078	1.04797	1.03968	1.04661	1.03153	1.02869	1.02895	1.04952	1.02436	1.02533	1.00925	1.02724	1.04611	1.03385	1.01371	1.02393	1.01701	1.0022	1.02401
	1.27723	1.02514	1.00802	1.03296	1.02641	1.00818	1.01751	1.01531	1.0026	0.988025	1.01051	1.01718	1.01435	1.00895	1.02755	1.03431	1.02362	1.02953	1.03612	1.03189	1.05583	1.02977	1.01749	1.02622	1.03116	1.0122	1.02102	1.03829	0.997985	1.02415	1.01217	1.04339	1.03973	1.03429	1.00974	1.04246	1.02994	1.01801	1.03946	1.04854	1.02915	1.02823	1.04872	1.02182	1.00648	1.02319	1.01277	1.00533	0.997701
	1.27713	1.03515	0.998182	1.02562	1.01934	1.01833	1.00811	1.00307	1.01774	1.01713	0.994826	1.01846	1.02418	1.0103	1.03799	1.0259	1.01607	1.01733	1.02461	1.01774	1.02284	1.02606	1.03803	1.01813	1.01241	1.01611	1.0322	1.04845	1.01955	1.01776	1.01459	1.02286	1.02846	1.04548	1.02903	1.0361	1.01862	1.0437	1.04093	1.02761	1.01981	1.02285	1.0425	1.03602	1.01787	1.04429	1.024	1.0386	0.992989
	1.27703	1.01539	1.0068	0.986697	1.02183	1.02178	1.0485	0.990726	0.990339	1.00476	0.996248	1.01993	1.03147	1.0116	1.02389	1.03549	1.04959	1.05112	1.00823	1.00068	1.02933	1.01439	1.04865	1.01039	1.00926	1.00446	1.02196	1.04434	1.01857	1.00822	1.01562	1.02058	1.01528	1.01966	1.02586	1.03494	1.02224	1.03948	1.02985	1.02265	1.02768	1.03459	1.01895	1.01616	1.01055	1.03035	0.999233	1.00189	1.0068
	1.27693	0.990972	1.00924	1.01061	1.00615	1.00471	1.00261	0.986881	1.01716	0.996009	1.00295	1.02356	1.01554	1.03644	1.02174	1.02378	1.03002	1.01214	1.01954	1.04343	1.00771	1.03816	1.03811	1.00785	1.02372	1.03062	1.01856	1.03679	1.01847	1.00603	1.00773	1.02289	1.02119	1.0175	1.00844	1.02659	1.0468	1.03322	1.04184	1.04876	1.0352	1.05276	1.0272	1.01706	1.00039	1.01712	1.01003	1.01579	1.00675
	1.27683	0.999484	1.02318	1.00164	0.99365	1.0091	1.00432	0.998033	1.00118	1.01986	1.01151	1.03753	1.01305	1.03527	1.01818	1.02165	1.03668	1.03241	1.02294	1.02628	1.02406	1.02103	1.02022	0.996987	1.01996	0.983457	1.01911	1.04862	0.999459	1.00426	0.988995	1.01097	1.02846	1.02944	1.02423	1.03338	0.997138	1.04129	1.05239	1.00768	1.0301	1.00359	1.04264	1.01768	1.0169	1.03016	1.01977	0.998934	1.01607
	1.27673	1.02326	1.02806	0.997208	1.02448	1.03287	1.02732	1.01867	1.01849	1.00581	1.04026	1.01209	1.01427	1.02118	1.03571	1.0335	1.0257	1.03801	1.04035	1.02785	1.03964	1.03093	1.03478	1.00919	1.01143	1.03598	1.02501	1.0031	1.0134	0.988476	1.00126	1.01325	1.01464	1.0157	1.01155	1.02468	1.02479	1.03851	1.03899	1.00938	1.03013	1.03967	1.02367	1.03048	1.00957	1.02078	1.00261	1.01733	1.01489
	1.27663	1.00576	1.01948	1.00921	1.00584	1.03815	1.02746	1.00317	1.01269	0.990715	1.01145	1.00232	1.01299	0.994879	1.01577	1.03028	1.03909	1.04371	1.02726	1.02385	1.03578	1.02221	1.02199	1.03347	1.03181	1.00786	0.987235	1.03414	1.01401	1.00766	1.00719	1.00428	1.01234	1.01794	1.02793	1.02444	1.02572	1.02655	1.00902	1.00895	1.01443	1.01352	1.02078	1.02993	1.01595	1.02643	1.00563	1.02385	1.0125
	1.27653	1.01094	0.971557	1.0158	1.0147	1.01968	1.01315	0.990303	1.02469	0.995801	1.01152	0.999722	1.01679	1.01016	1.04017	1.03359	1.028	1.04375	1.01398	1.01275	1.049	1.0284	1.01844	1.01226	1.03747	1.02005	1.03123	1.02314	1.03438	1.00111	1.00773	1.0165	1.00805	1.03052	1.00565	1.01105	1.02825	1.04698	1.02241	1.03518	1.02846	1.00702	1.00781	1.04962	1.00122	1.02523	1.02114	1.01076	1.01002
	1.27643	1.00191	1.00155	1.02751	1.02601	1.0289	1.013	1.0189	1.02446	1.01619	0.993937	0.995024	1.02063	1.01276	1.03107	1.01719	1.03915	1.02269	1.01097	1.01036	1.04121	1.02584	1.02835	0.995941	1.04079	1.0069	1.0233	1.03532	1.01271	1.00748	1.01283	1.01548	1.01575	1.02049	1.0377	1.02539	1.00701	1.04549	1.04631	1.03381	1.03927	1.0196	1.0139	1.04207	1.02133	1.04017	1.01099	0.999235	0.998749
	1.27634	1.0259	1.02264	1.01178	0.995776	1.00009	1.01865	1.00989	1.02193	1.01098	1.00488	1.0303	1.02737	1.01116	1.03377	1.02925	1.04064	1.02979	1.02941	1.02584	1.04541	1.0244	1.01204	1.02391	1.04063	1.01774	1.04108	1.01568	1.03148	1.00143	1.00792	0.987272	1.01911	1.02111	1.03118	1.01869	1.01163	1.04185	1.04216	1.03921	1.02118	1.03667	1.0121	1.04544	1.01411	1.04856	0.979415	1.00346	1.0279
	1.27624	1.01899	0.985927	1.02644	1.01861	1.02316	1.02885	1.01944	1.02214	1.02714	1.01003	1.01002	1.02863	1.04013	1.02148	1.0349	1.01197	1.01854	1.04458	1.03283	1.00291	1.00679	1.01366	1.01068	1.01223	1.00142	1.02551	0.995333	1.00892	1.00825	0.998713	1.03518	1.00556	1.00045	1.02169	1.0041	1.01758	1.03925	1.01668	1.03765	1.0362	1.02354	1.02333	1.03749	1.00431	1.03241	1.0046	0.992893	1.02016
	1.27614	1.0098	1.03053	0.999811	1.01607	1.02635	1.02556	0.996541	1.03214	0.989624	1.01897	0.996114	1.01954	1.04812	1.04306	1.03158	1.02805	1.01676	1.0418	1.01084	1.036	1.01663	1.03057	1.0313	1.01547	1.01601	1.03542	1.02232	1.00504	1.01907	1.02877	1.00918	1.0202	1.00727	1.02289	1.02824	1.02406	1.00737	1.02019	1.02441	1.00634	1.03936	1.02889	1.03977	1.02262	1.02757	0.998944	0.987977	1.02278
	1.27604	1.01666	1.00521	1.01026	1.01748	1.01866	1.01278	1.0075	1.02121	0.998664	0.994108	1.00809	1.00208	0.9933	1.0229	1.01096	1.01754	1.00755	1.02606	1.00286	1.03742	1.02656	1.02357	1.04299	1.02498	1.00913	1.00038	1.00944	0.987308	1.01074	1.01926	1.02985	1.02921	1.01483	1.01366	0.999236	1.00525	1.03926	1.02501	1.00394	1.0306	1.03223	1.02317	1.02734	1.02372	1.03004	1.02519	1.02132	0.998193
	1.27594	0.999249	0.999972	0.998696	1.0057	1.01541	1.01408	1.01985	1.01628	1.02335	1.01356	1.01766	1.01416	1.0259	1.03567	1.03988	1.0412	1.02683	1.02305	1.02085	1.04897	1.00625	1.01994	0.980037	1.00165	1.01869	1.02451	1.00956	1.0239	1.0175	1.04889	1.02294	1.00064	1.01861	1.01867	1.03107	1.01447	1.02181	1.01657	1.02731	1.03642	1.01513	1.00945	1.04269	1.01797	1.02502	1.00954	1.00949	1.00328
	1.27584	1.0073	0.995585	1.01849	0.996222	1.01454	1.01985	0.999161	1.01659	1.00809	1.02445	1.01565	1.00865	1.01524	1.02955	1.02815	1.02206	1.02984	1.01588	1.05722	1.01892	1.0089	1.0081	1.00344	1.02962	0.998163	1.02176	1.02289	1.00933	1.01842	1.00882	1.01469	1.00839	1.00037	1.00399	1.03113	1.00731	1.03354	1.02761	1.03611	1.04948	1.025	1.04592	1.05183	1.00541	1.02487	1.00217	1.03179	1.03481
	1.27574	1.00729	1.00654	1.0242	1.00411	1.01842	1.02464	1.02475	1.01342	0.995379	0.991967	1.00188	1.02675	1.02141	1.0205	1.02814	1.01608	1.03603	1.00733	1.02359	1.02341	1.01841	1.02018	1.00451	1.03177	1.00925	1.02453	1.02652	0.999612	1.01016	1.02101	1.01186	1.00578	1.01539	1.02764	1.0237	1.00939	1.02161	1.00564	1.00793	1.00684	1.0033	1.0229	1.02764	0.997314	1.01917	0.988331	0.999475	1.02427
	1.27564	1.0087	1.00793	1.00588	1.00545	1.02936	1.02473	1.02592	1.02439	1.00409	1.00417	1.01343	1.02931	1.01671	1.01407	1.01876	1.04033	1.01146	1.05687	1.01324	1.01877	1.01252	1.0213	1.02645	1.01109	1.00244	0.987055	1.01964	1.01672	1.00863	0.993288	1.00111	1.02208	1.01282	1.00502	1.00192	0.996018	1.00857	1.05786	1.01973	1.00334	1.03511	1.0231	1.04795	1.0218	1.02741	1.01215	1.02391	1.03612
	1.27554	1.01446	0.992397	0.999777	1.02338	1.01028	1.00055	0.997696	1.02159	1.00387	1.00544	1.01705	1.02963	1.02462	1.03654	1.01222	1.02571	1.01911	1.02572	1.02766	1.00339	1.02209	1.0203	0.992725	1.01903	1.00481	0.997502	1.0088	1.01194	1.00847	1.00481	1.01986	1.00224	1.00038	1.01695	1.0298	1.02702	1.02621	1.02273	1.03005	1.03214	1.01941	1.02489	1.04444	1.00892	1.02832	1.00829	1.00127	1.02709
	1.27544	1.00037	0.995396	1.00295	1.03578	1.03049	1.00776	0.990767	1.02915	0.991514	0.999979	1.00031	1.02514	1.02148	1.02577	1.00407	0.995505	1.02999	1.02861	1.01174	1.02626	1.00316	1.02704	0.989679	1.01353	1.00003	0.994127	1.01838	1.01662	1.01451	1.01985	1.01621	1.01265	1.0154	1.01608	1.00401	1.0359	1.03056	1.03751	1.01016	1.0439	1.01927	1.03471	1.03227	1.00768	1.0381	1.01197	1.01805	1.01368
	1.27534	1.01027	1.00643	1.00862	1.03747	1.01497	1.03489	0.987936	0.99213	1.00107	1.01504	1.01349	1.02101	1.02461	1.02493	1.03069	1.00998	1.02857	1.0258	1.03235	1.03345	1.01835	1.01141	1.00054	1.01948	1.01294	0.991867	1.01061	0.982758	0.996129	1.00659	1.00927	1.00939	1.00574	0.995037	1.01784	0.99912	1.05323	1.0154	1.03299	1.04841	1.0293	1.00874	1.03402	1.01585	1.02757	0.994386	1.00623	1.01368
	1.27524	0.979462	1.00221	0.991343	1.01362	1.02896	1.00021	0.999131	1.05382	1.02112	1.0219	1.03686	1.01128	1.01837	1.0173	1.04299	1.03446	1.00998	1.00305	1.00917	1.0393	1.01167	0.995012	1.01602	1.00505	0.996408	1.00985	1.02977	0.995537	1.01284	0.99448	1.0244	1.01922	1.00032	1.03878	0.989283	1.01623	1.04132	1.0005	1.06222	1.01404	1.0098	0.996169	1.03078	1.01979	1.03744	1.0297	0.997656	1.0109
	1.27514	1.00033	0.980258	1.00613	1.00814	1.0396	1.01634	1.02464	1.02713	1.0083	1.02055	1.02247	0.996104	1.02315	1.01167	1.01296	1.02345	0.994829	0.997798	0.989842	1.03203	1.02912	1.0487	1.01722	1.01747	0.970301	0.983944	1.01593	0.983281	1.00985	0.997741	1.02416	1.00945	1.01802	1.0104	1.02181	1.03111	1.03672	1.03794	1.02048	1.00912	1.03948	1.03603	1.02187	1.00538	1.00938	0.997989	0.997853	0.985167
	1.27504	1.01159	0.985474	0.998873	1.03485	1.01279	0.994285	1.03332	1.02928	1.0054	1.02058	0.998422	1.02402	1.00553	1.0256	1.03443	1.02585	1.03972	1.02253	0.996345	1.03194	1.00551	1.0199	1.01444	1.00006	0.997262	0.981815	1.00305	0.980394	1.00275	0.98615	1.03531	0.975354	0.995443	1.01331	1.00035	1.00517	1.01672	1.02286	1.04199	1.02887	1.01818	1.02563	1.01714	1.03275	1.03714	1.00814	1.01781	1.0007
	1.27494	1.02309	1.0341	1.02756	1.01646	1.0116	1.01139	1.0035	1.02687	1.03013	1.0149	0.997548	0.993874	1.02324	1.01168	1.03207	1.04378	1.03337	1.00525	1.02877	1.04718	0.979334	1.03019	1.03493	1.03622	0.987971	0.984853	0.99282	0.967312	1.00269	0.982488	1.01351	0.9892	0.990416	0.987578	1.00061	1.0006	1.02254	1.02423	1.0484	1.00912	1.0128	1.00529	1.01921	1.0116	1.01908	1.01459	1.01393	1.03329
	1.27484	1.01756	1.02801	1.00439	1.03057	1.01527	0.991709	1.02913	1.01479	0.986082	1.01777	1.00305	1.02703	1.0233	0.997348	1.03847	1.04126	1.02836	1.03243	0.999873	1.01141	1.00678	1.02267	0.993001	1.03565	0.98112	0.998512	0.979382	0.981726	0.990583	0.984082	1.00306	0.979639	0.981246	1.03569	1.0166	0.998159	1.00759	1.0189	1.01728	1.02299	1.02304	1.01194	1.05845	1.013	1.06246	1.00608	1.00191	1.02128
	1.27474	0.995986	1.00935	1.03226	1.0151	1.00599	0.995119	1.01285	1.01165	1.00631	1.00729	1.014	1.02159	1.01819	1.03025	1.03482	1.0362	1.02496	1.02116	0.997048	1.00378	1.01665	1.01116	0.986989	1.01781	1.01063	0.992396	1.00672	0.993689	0.986878	0.981444	1.01086	0.985505	0.991749	1.01448	1.0137	0.99318	1.03057	1.01887	1.01827	1.01935	1.02911	1.04997	1.04425	1.00927	1.03617	1.0236	1.00613	1.0167
	1.27464	1.01519	0.988578	1.0111	1.01516	1.01243	1.00952	0.988318	1.02845	1.00197	0.997396	1.00249	1.02007	1.04287	1.02347	1.01774	1.0677	1.04236	0.985762	0.996276	1.03016	0.998964	1.02952	0.98221	0.993412	1.00062	0.982153	0.983672	0.998996	0.973706	0.985171	0.987587	0.985536	1.00481	0.995634	1.01083	1.00638	1.03397	1.03738	1.0166	1.01572	1.02073	0.998517	1.0517	1.02152	1.0328	1.01063	1.01554	1.02285
	1.27454	0.995666	0.995641	0.997701	0.993525	1.03402	1.00076	0.998976	1.01679	1.00794	0.992573	1.01997	1.02757	1.00766	1.03789	1.04424	1.02039	1.01786	1.00766	0.994006	1.02839	0.994345	0.994274	0.997237	1.00277	0.97641	0.994627	0.998637	0.988153	0.963576	0.98707	0.999851	0.987492	0.978973	0.974511	0.996218	1.01471	1.0056	1.0047	0.996347	1.02234	1.04242	1.04021	1.03361	0.97731	1.04323	1.00746	1.01986	1.02587
	1.27445	1.00922	1.02029	1.03636	0.992825	1.01936	1.03937	0.991155	1.03069	1.00333	0.999917	1.00397	1.04215	1.00894	1.01274	1.03501	1.05017	1.01549	1.00967	1.00218	0.997563	1.00067	1.00983	0.994543	0.990931	1.00305	0.981363	0.973819	0.963147	0.990463	0.993198	1.00047	0.970442	0.994872	1.02733	1.00205	1.00211	0.999909	1.01884	1.00904	0.998235	1.03737	1.03873	1.0515	1.0301	1.00931	0.999349	0.991269	0.995103
	1.27435	0.998268	1.00937	0.994659	0.993803	1.03308	1.02285	1.01009	1.02365	1.01725	0.998059	0.998378	1.00005	1.00856	1.04036	1.02014	1.04792	1.01333	1.01195	0.98709	1.01238	0.977805	1.02341	0.990917	0.997823	0.976565	0.982744	0.970223	0.986403	1.00868	0.985921	0.969592	0.979191	0.994264	0.990287	0.979299	0.980946	1.02007	1.00322	0.995829	1.01857	1.01531	1.01023	1.01614	1.0026	1.00878	0.998045	0.995407	1.01828
	1.27425	1.04657	1.01896	0.996523	1.01219	1.02605	1.00088	0.973746	1.03596	1.00924	1.04269	1.00455	1.02826	0.995838	1.02778	1.00636	1.01589	1.03186	1.0088	1.00059	1.04015	0.983803	1.02632	0.981338	0.968269	0.981978	0.968775	0.970655	1.01706	0.970307	0.987955	0.960495	0.970945	0.99059	0.999005	0.979501	0.975335	1.02526	1.01884	1.00108	1.02132	1.03204	1.01505	1.04407	1.03723	1.04197	1.00423	0.982329	0.986152
	1.27415	1.00784	1.00613	1.00409	0.995052	1.01245	1.02009	1.02057	1.01643	1.02742	1.00654	1.02488	1.0401	1.02557	1.02848	1.02683	1.03689	1.00934	1.00515	1.02698	0.984233	1.01002	0.994117	0.97386	0.969003	0.949335	0.953003	0.965675	0.961252	0.949686	0.958312	0.987963	0.979735	0.999871	0.977193	1.00236	1.00922	1.00378	1.02029	1.01983	1.00876	1.01582	1.02426	1.04516	1.015	1.01568	1.01621	0.994665	1.00275
	1.27405	1.0272	1.00778	0.983825	1.00448	1.0391	1.00756	1.03608	1.0043	1.00401	1.02249	0.983278	1.00578	1.01628	1.03536	1.01814	1.0268	1.02644	1.01246	1.0102	1.01108	1.02155	0.989949	0.952043	0.977446	0.980739	0.957384	0.976956	0.966831	0.958578	0.950761	0.970337	0.972533	0.97713	0.987047	1.00869	0.999359	1.02339	1.03352	1.02744	1.02645	1.02155	1.01794	1.02765	1.00115	1.01709	1.02097	0.986834	1.03358
	1.27395	0.99494	1.01939	0.986401	1.0234	1.03014	1.03025	1.01421	1.02875	1.00897	1.0242	1.01394	0.995521	1.00135	1.04088	1.02224	1.00888	1.02089	1.0172	1.0009	0.988768	0.998535	0.991337	0.965566	0.979715	0.952815	0.952054	0.9624	0.959251	0.955984	0.963836	0.969954	0.983831	0.972539	0.997929	0.982817	0.988057	0.994444	1.02617	1.02435	1.00558	0.986514	0.998961	1.06744	0.999789	1.00931	1.012	0.997003	1.01976
	1.27385	1.0193	0.991577	1.01563	0.971566	1.0187	1.00451	1.01075	1.03883	1.00236	1.00795	1.01812	1.02717	1.02369	1.00924	1.01385	1.01824	1.03021	1.00767	0.994734	1.00237	0.981359	0.999449	0.975532	0.973827	0.956514	0.95722	0.944617	0.9499	0.932342	0.942927	0.964058	0.963506	0.973261	0.992311	1.01112	0.98944	1.04076	1.01194	0.997635	1.00953	1.06147	1.00483	1.07078	0.994592	1.02076	1.01437	0.985489	1.01677
	1.27375	0.990526	0.999881	1.00637	1.03127	1.03358	1.02302	1.02199	1.04041	1.01916	1.01773	1.01044	1.00904	1.0096	1.02345	1.03403	1.01009	1.00275	1.0192	0.985531	1.02358	0.992552	0.960774	0.967207	0.96654	0.962567	0.950884	0.957871	0.923623	0.959305	0.956551	0.967922	0.967002	0.973525	0.976699	0.996268	1.00832	0.99377	1.01339	1.04017	1.00168	1.04274	1.01171	1.02272	1.00006	1.04824	1.02205	1.00422	1.01064
	1.27365	1.02744	1.01425	0.987658	1.01857	1.0094	1.02023	1.0021	1.02524	0.993964	1.03014	0.973829	1.02484	1.02013	1.01617	1.03818	1.03141	0.995604	1.00673	1.00695	1.00431	0.989959	0.957488	0.969943	0.970921	0.945754	0.936793	0.993368	0.947667	0.968796	0.954745	0.948995	0.949205	0.947943	0.962848	0.995048	1.01015	1.00195	1.02883	1.01349	1.00844	1.02788	0.985276	1.04321	1.0348	0.990316	0.997858	1.0154	0.998285
	1.27355	0.993735	0.993837	1.00164	0.986282	1.03827	1.03717	1.00357	0.99799	1.01281	1.01646	1.00824	0.989558	0.994478	1.05095	1.00963	1.03838	0.987002	0.99632	0.996161	0.99388	0.995264	0.987394	0.942524	0.944773	0.93724	0.927984	0.943941	0.934719	0.930015	0.943871	0.935252	0.967401	0.977011	0.973553	0.992409	1.0005	1.01883	0.996218	1.03339	1.00806	1.03289	1.02767	1.04589	1.01363	1.00815	1.00755	0.981449	1.01209
	1.27345	1.0251	0.998532	1.00672	0.992709	1.04271	1.02584	1.01943	1.02696	1.00825	1.01205	1.00508	1.02144	1.02699	1.02756	1.0141	1.02207	0.990836	1.01431	1.0036	0.974963	0.978402	0.986548	0.972125	0.941288	0.946367	0.923805	0.952016	0.927291	0.93931	0.945623	0.942849	0.951087	0.982929	0.961291	0.960562	0.990555	1.00661	1.00866	1.02787	1.02466	1.02941	1.00916	1.06932	1.01373	1.04787	1.0253	0.996977	1.01208
	1.27335	1.00004	1.03161	1.01629	1.00473	1.03422	1.02998	1.00206	0.999224	1.02536	1.00306	0.999328	1.01226	1.00981	1.0428	1.01912	1.02338	1.03418	0.99878	0.991725	1.01115	0.969106	0.970751	0.947914	0.939085	0.930581	0.901636	0.916367	0.91734	0.926624	0.910119	0.920848	0.933681	0.94305	0.95917	0.981488	1.01078	0.986363	0.99344	1.00696	1.01916	1.00553	1.0226	1.03179	1.03373	1.03066	0.997498	0.993418	1.0415
	1.27325	1.0327	1.00482	1.00858	1.00788	1.02865	1.02999	0.991282	1.0157	0.995706	1.01499	0.997884	1.02296	1.02198	1.0441	1.01767	1.01929	1.01882	0.986362	0.995764	0.97117	0.962452	0.944978	0.949864	0.935909	0.95507	0.928083	0.92173	0.92529	0.889332	0.893202	0.929413	0.930102	0.938211	0.943607	0.966974	0.985209	0.99241	0.978381	1.03311	0.978953	1.01226	1.01126	1.06299	1.01374	1.04064	1.01011	0.995149	1.0006
	1.27316	1.03112	1.00943	1.01633	0.995852	1.03023	1.02315	0.99737	1.03409	1.0113	0.998182	1.00573	0.987435	1.01837	1.03383	1.02722	1.03023	0.990965	0.994579	0.989527	0.989423	0.959076	0.953594	0.933328	0.936371	0.938916	0.903411	0.894642	0.911987	0.926226	0.912944	0.916557	0.93146	0.93741	0.949682	0.982087	0.974767	1.00411	1.01444	1.02787	0.996215	1.02546	1.02739	1.03467	1.02364	1.05521	1.0088	0.98764	0.990661
	1.27306	1.00157	1.01105	1.0049	1.00608	1.02523	1.01619	0.992381	1.02969	1.02105	1.00836	0.978945	1.02993	1.03719	1.01888	1.02003	1.02449	0.991161	0.971309	0.97628	0.961939	0.97057	0.949474	0.942845	0.938946	0.900259	0.904186	0.899474	0.901148	0.882685	0.914514	0.885888	0.926851	0.930114	0.948049	0.973174	0.998512	1.01408	1.00385	0.977405	1.01109	1.00407	1.01633	1.03198	1.04485	1.04173	1.0118	1.02802	1.01716
	1.27296	1.02312	1.00775	1.01767	1.00736	1.0232	1.01151	1.00899	1.01594	1.01617	1.01122	0.985112	0.989152	1.0396	1.01662	1.02551	1.01211	0.981823	0.999467	0.980848	0.955543	0.942088	0.933838	0.927678	0.908025	0.89138	0.895709	0.9085	0.897456	0.876806	0.9087	0.934314	0.923051	0.918051	0.935827	0.948884	0.963791	0.991375	0.996548	1.01185	0.999366	1.03729	1.00907	1.04069	1.02112	1.05087	0.986209	1.02636	1.01896
	1.27286	1.021	1.00763	1.03025	1.0052	1.03201	1.0013	1.02321	1.04024	1.0127	0.9713	1.00504	1.01201	0.992869	1.02295	1.01036	0.989348	1.0287	1.01725	0.98542	0.973306	0.960497	0.942787	0.916722	0.922266	0.892143	0.880778	0.86727	0.895453	0.870472	0.89643	0.89864	0.877723	0.95164	0.930729	0.943768	0.946958	0.942193	0.99556	1.02746	1.01938	1.03106	0.992367	1.04032	1.01554	1.05825	1.01595	0.976934	1.01547
	1.27276	1.0122	0.996489	1.00958	1.04029	1.0451	1.02842	0.996886	1.01593	1.00725	1.01424	1.00878	1.00657	1.00997	1.01512	1.00792	0.998827	0.999356	0.997488	0.980111	0.973661	0.932956	0.954474	0.927774	0.885257	0.885378	0.878603	0.878694	0.857977	0.870982	0.864724	0.885394	0.888012	0.922121	0.913372	0.962697	0.965116	0.989606	1.00524	1.04353	1.00841	0.998802	0.99974	1.04037	0.98052	1.02776	1.01971	1.01542	1.00635
	1.27266	1.01598	1.01135	1.02487	0.98319	1.0246	1.0186	1.00237	1.01902	1.01441	0.996124	1.0086	0.990141	1.02644	1.0271	1.00908	1.02504	1.02185	0.975182	0.985524	0.94182	0.940933	0.899919	0.882915	0.903549	0.868763	0.866475	0.86458	0.885547	0.873662	0.877611	0.876286	0.895078	0.924988	0.936213	0.931748	0.954191	0.978639	0.963444	0.993147	0.997099	1.01758	1.00015	1.04223	0.997048	1.02479	1.02103	0.975949	1.01554
	1.27256	1.02968	1.0114	0.999563	0.988128	1.05042	1.01194	1.00051	1.02183	1.00483	0.999037	1.0155	1.00418	1.04465	1.03456	1.03497	1.01962	1.02796	0.964762	0.985817	0.957307	0.936371	0.912206	0.891588	0.885856	0.859202	0.846464	0.86603	0.864897	0.86622	0.859836	0.860183	0.862721	0.89585	0.915521	0.938559	0.947247	0.964026	0.98118	1.00236	1.04669	1.03393	0.989197	1.05287	1.00868	1.03688	1.01946	0.986423	1.01943
	1.27246	0.996928	1.01952	1.00502	1.02379	1.02007	0.984434	0.970249	1.01944	0.988397	1.02726	0.974823	1.01565	1.03591	1.02625	1.01429	0.998452	0.989949	0.973441	0.988811	0.938162	0.940051	0.919722	0.86864	0.878608	0.837787	0.838852	0.843571	0.842533	0.853879	0.871323	0.857189	0.863938	0.897558	0.896962	0.932117	0.901396	0.955124	0.978121	1.02131	0.993411	0.988651	1.01392	1.00447	1.00175	1.00525	1.02375	0.971461	1.01958
	1.27236	1.01086	1.01151	1.00234	1.00026	1.05425	1.0166	0.981746	1.01493	1.04591	1.00107	1.00767	1.00745	1.01263	1.02194	1.01183	1.01707	1.03232	0.958925	0.95678	0.936995	0.923154	0.904918	0.870868	0.8468	0.840743	0.820933	0.831951	0.826347	0.825205	0.830415	0.843404	0.845621	0.876088	0.894382	0.904759	0.951438	0.968261	0.966146	0.984703	0.98525	1.02482	1.03326	1.03315	0.989319	1.04729	1.00481	0.988043	0.988885
	1.27227	0.990214	1.01373	0.995201	1.03284	1.01249	1.01278	0.98986	1.00868	1.00125	1.01712	1.00276	1.01577	1.04684	1.01155	1.03542	0.981102	0.988029	0.983266	0.950073	0.936396	0.914815	0.8872	0.884878	0.843217	0.84152	0.815958	0.825035	0.793381	0.812925	0.8261	0.851537	0.854016	0.857697	0.887094	0.88744	0.930601	0.932327	0.977595	0.999039	0.976901	0.99297	1.00189	1.02718	1.01261	1.03571	1.0117	1.00052	1.01781
	1.27217	1.01141	1.01396	1.01865	1.0012	1.04031	1.01224	0.998264	1.0317	1.00985	0.989866	0.986366	0.996529	1.02223	1.01825	1.00915	1.01205	0.967256	0.971167	0.930521	0.919574	0.892732	0.89644	0.845376	0.835768	0.80052	0.785712	0.782867	0.772757	0.802125	0.782659	0.830201	0.858988	0.883161	0.888616	0.871707	0.904878	0.934185	0.956567	0.991816	0.994428	1.00178	0.990747	1.05214	1.0181	0.996861	1.00406	0.993423	0.985495
	1.27207	1.01153	1.00499	1.02554	1.00751	1.01585	1.03212	1.02546	1.06482	1.04819	0.995669	0.970063	1.0202	0.973575	1.00238	0.984489	0.987434	0.981151	0.952489	0.926241	0.933973	0.85539	0.874759	0.870282	0.831396	0.808567	0.779473	0.773816	0.774335	0.787764	0.774329	0.777921	0.831282	0.858223	0.864819	0.873976	0.902663	0.933004	0.959904	0.964065	1.0006	0.990202	1.00488	0.997785	1.02409	1.04879	1.01144	1.00487	1.04163
	1.27197	1.01169	0.996005	1.02097	1.01407	1.02741	1.01216	1.0075	1.03922	1.01653	0.983861	1.00152	1.02478	1.04856	1.019	1.01995	0.972528	0.979366	0.957034	0.880649	0.916762	0.874919	0.857505	0.836806	0.821763	0.779705	0.761017	0.749826	0.76407	0.771693	0.756443	0.789637	0.80753	0.860132	0.865754	0.872381	0.902065	0.92309	0.950164	0.979237	0.986069	1.01351	1.00805	1.03558	0.986474	1.0328	1.01887	0.963095	1.02217
	1.27187	1.02108	1.03309	1.00684	1.00041	1.03383	1.01004	1.01682	1.03913	1.00505	0.98252	0.993013	1.02045	1.0223	1.00673	0.991879	0.983649	0.954952	0.965231	0.934058	0.879908	0.850034	0.84026	0.821183	0.791259	0.765957	0.712988	0.711111	0.739771	0.75428	0.763326	0.752975	0.798622	0.820392	0.846188	0.86678	0.889869	0.936461	0.936681	0.9788	0.976276	1.02997	0.997783	1.00689	1.01294	1.02551	1.01421	0.96921	0.998774
	1.27177	1.00017	0.986137	0.994842	0.998178	1.02965	1.04075	1.00278	1.02708	0.993345	1.0306	0.988845	0.995442	1.00928	0.984322	0.99983	0.984557	0.942771	0.992555	0.933906	0.894219	0.856285	0.825627	0.808642	0.776331	0.773114	0.719873	0.704494	0.698699	0.734782	0.720096	0.75499	0.790732	0.797239	0.811279	0.842077	0.888824	0.899077	0.944681	0.953835	0.994341	0.97236	0.972383	1.01729	1.0168	1.0309	1.00328	0.982007	0.986138
[truncated: 48 more rows]
[truncated: 7 more columns]

## Sheet: b
μ0H (T)	Energy (eV)	ΔR/R0
-1.5	1.368	0.983935	0.998579	0.98647	1.00669	0.99231	1.00352	1.0044	1.00503	1.00824	0.996592	0.997413	1.00918	1.01153	0.997741	1.01834	0.995389	0.993204	1.00395	0.998421	0.999634	1.00858	1.0025	1.00598	0.987391	1.00329	1.00438	0.994052	0.99843	1.00483	1.01265	0.99985
[truncated: 1,023 more rows]

## Sheet: c
μ0H (T)	Energy (eV)	ΔR/R0
[truncated: 1,024 more rows]

[truncated: 6 more sheets: d, e, f, g, h, i]
