# Supplementary material for: Magnetically-dressed CrSBr exciton-polaritons in ultrastrong coupling regime
Source: Research Square preprint supplement (doi:10.21203/rs.3.rs-3164083/v1), 2023-07-26
Supplement: Supplementary file 17 [file Source data guide.docx]

The Source Data ZIP file includes four source data files (**Figure 1.xlsx, Figure 2.xlsx, Figure 3.xlsx and Figure 4.xlsx**).

- Legend for **Figure 1.xlsx** file**:**

This file includes source data for Figure 1 in the main text.

- Legend for **Figure 2.xlsx** file**:**

This file includes source data for Figure 2 in the main text.

- Legend for **Figure 3.xlsx** file**:**

This file includes source data for Figure 3 in the main text.

- Legend for **Figure 4.xlsx** file**:**

This file includes source data for Figure 4 in the main text.

Different sheets correspond to different panels.
